# Supplementary material for: An Integrative Developmental Genomics and Systems Biology Approach to Identify an In Vivo Sox Trio-Mediated Gene Regulatory Network in Murine Embryos
Source: Hindawi journal article supplement (doi:10.1155/2017/8932583), 2017-01-01
Supplement: f1 [file 8932583.f1.pdf]

Figure S1

A

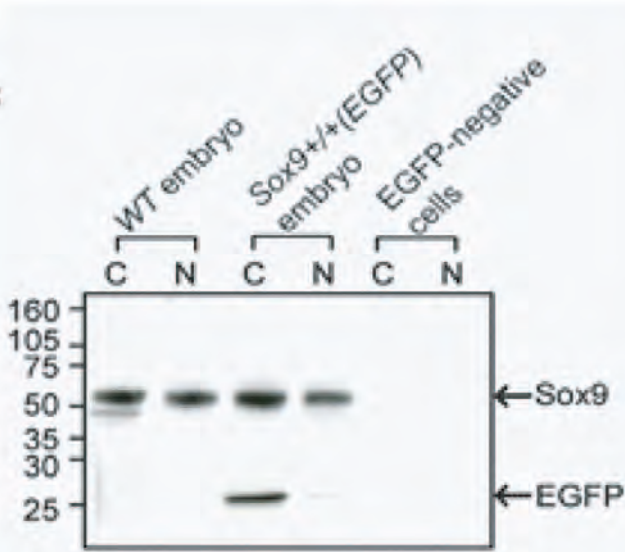

B

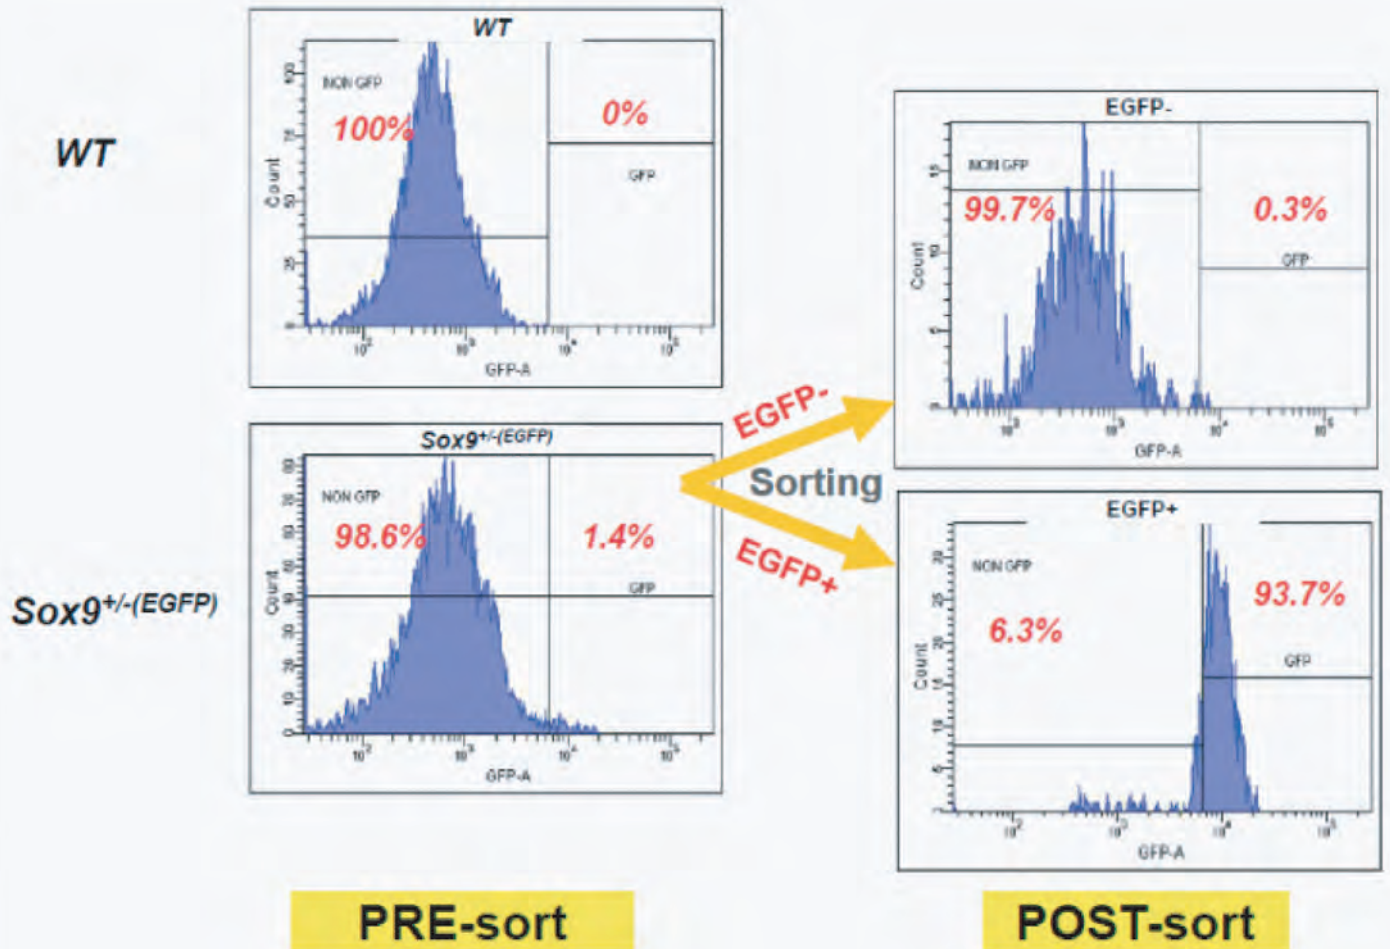

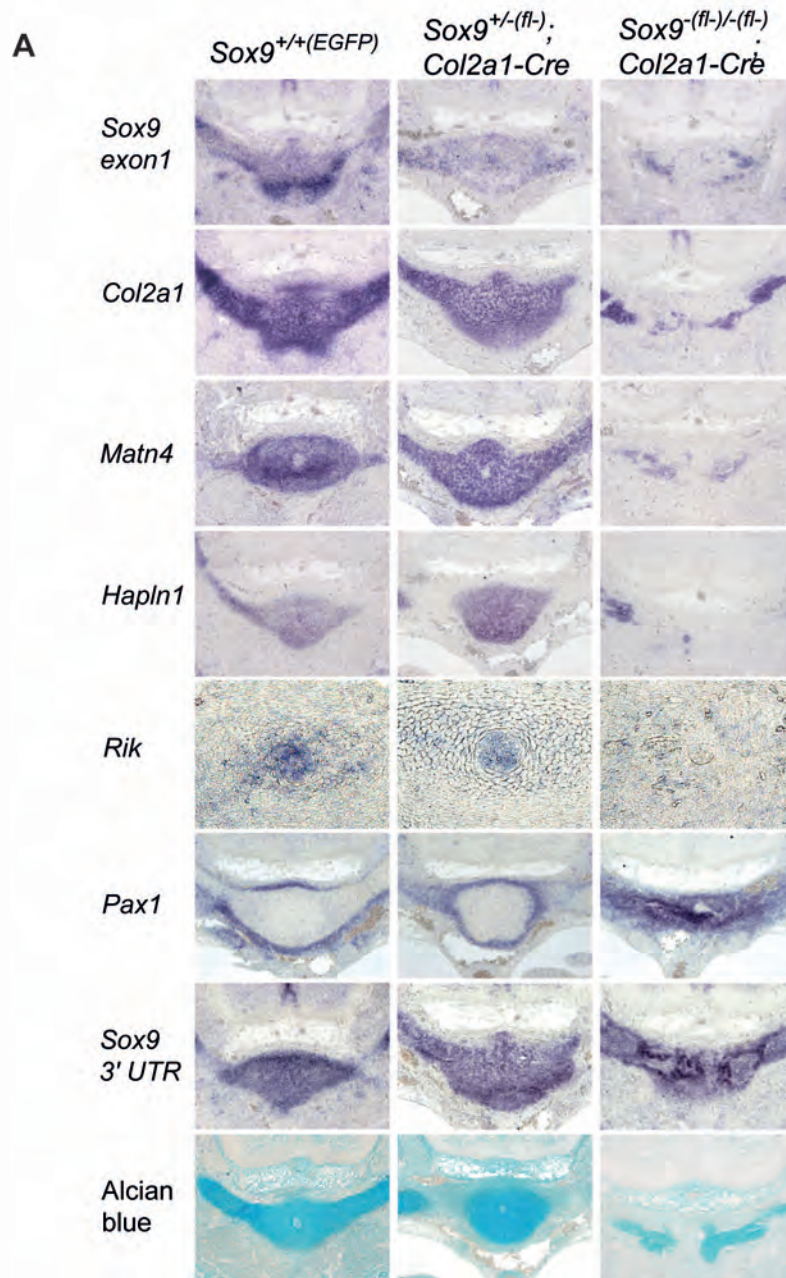

**B**

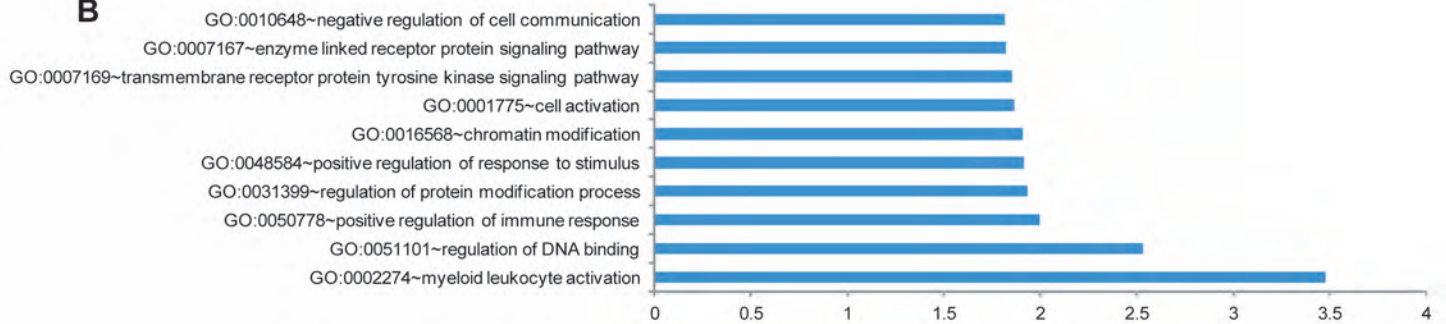

**C**

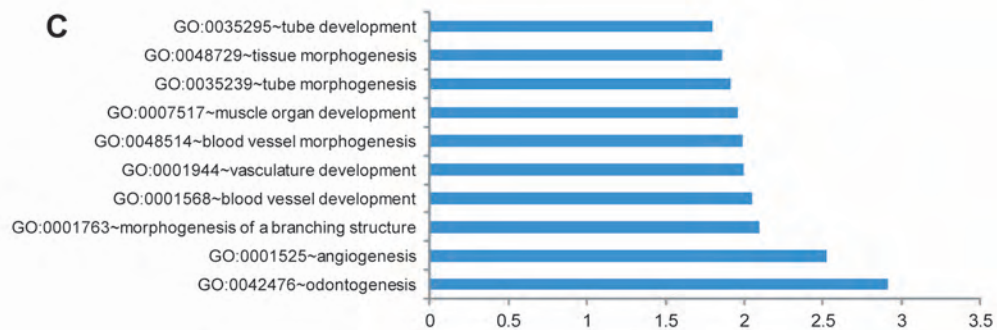

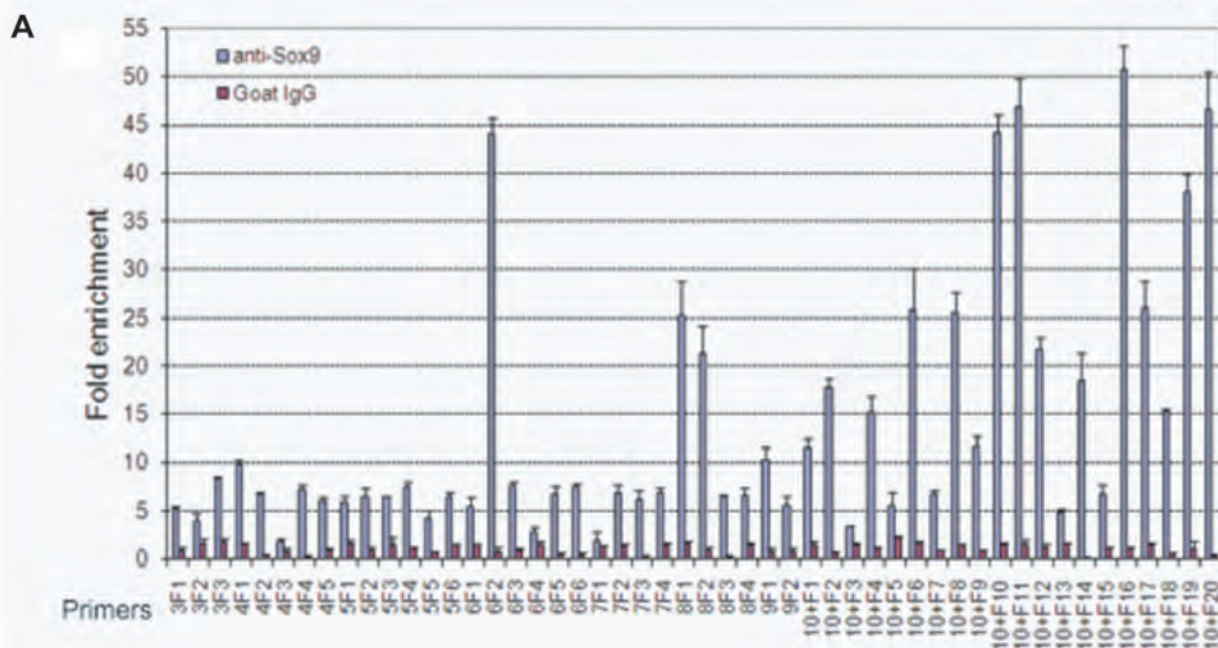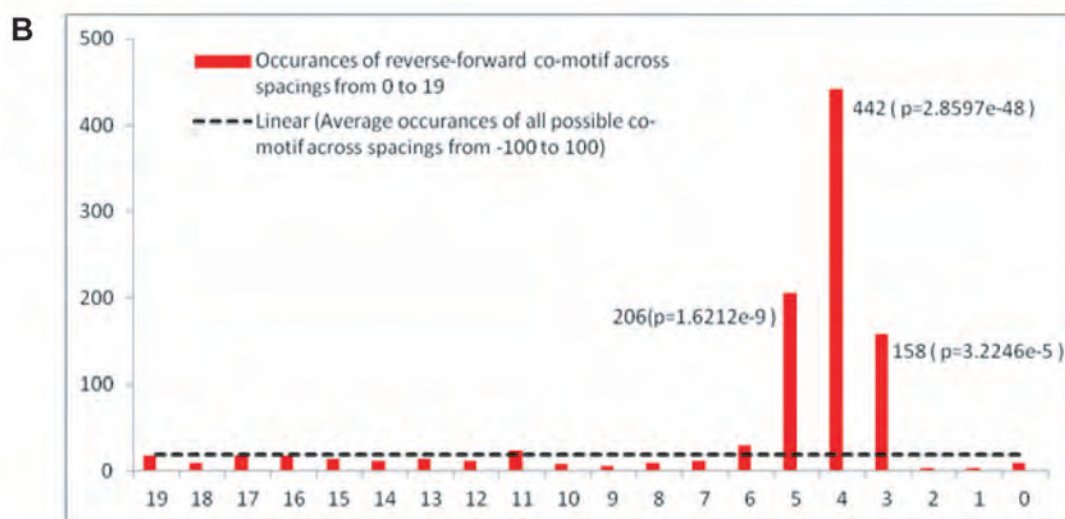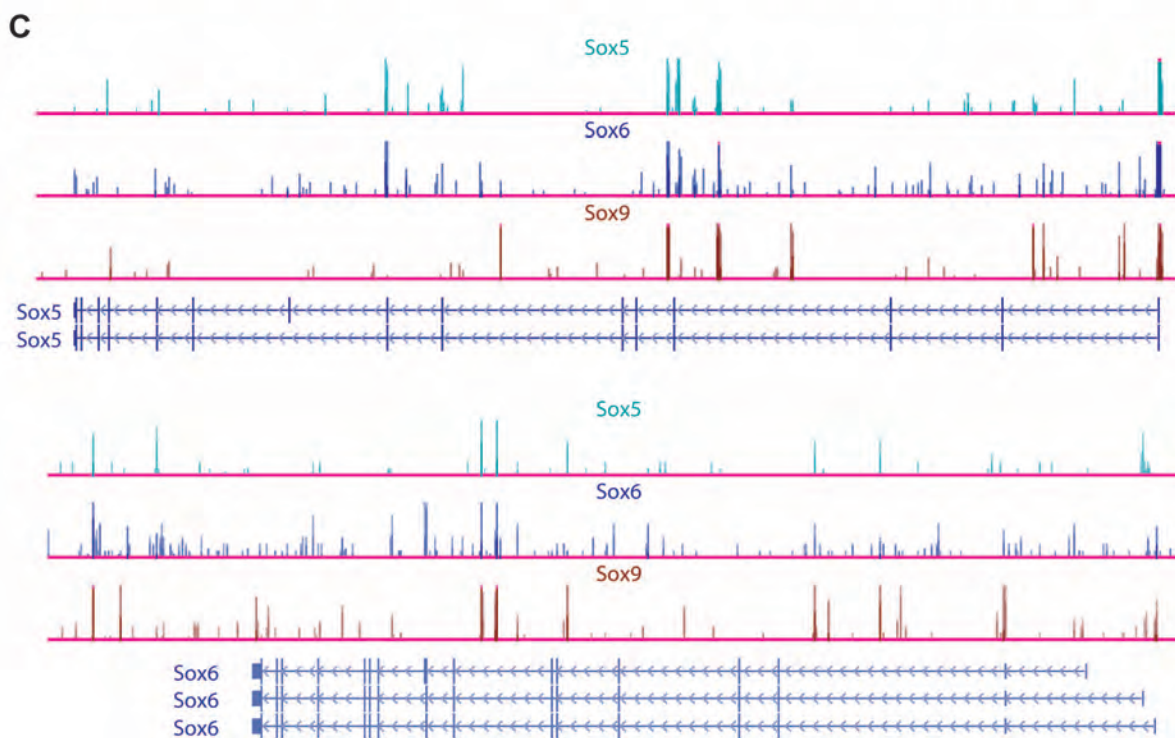

Figure S4

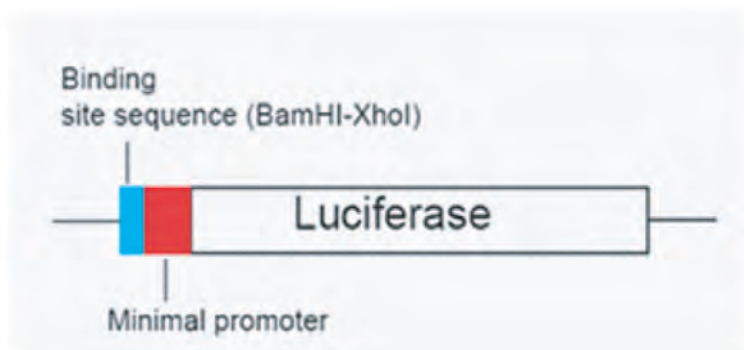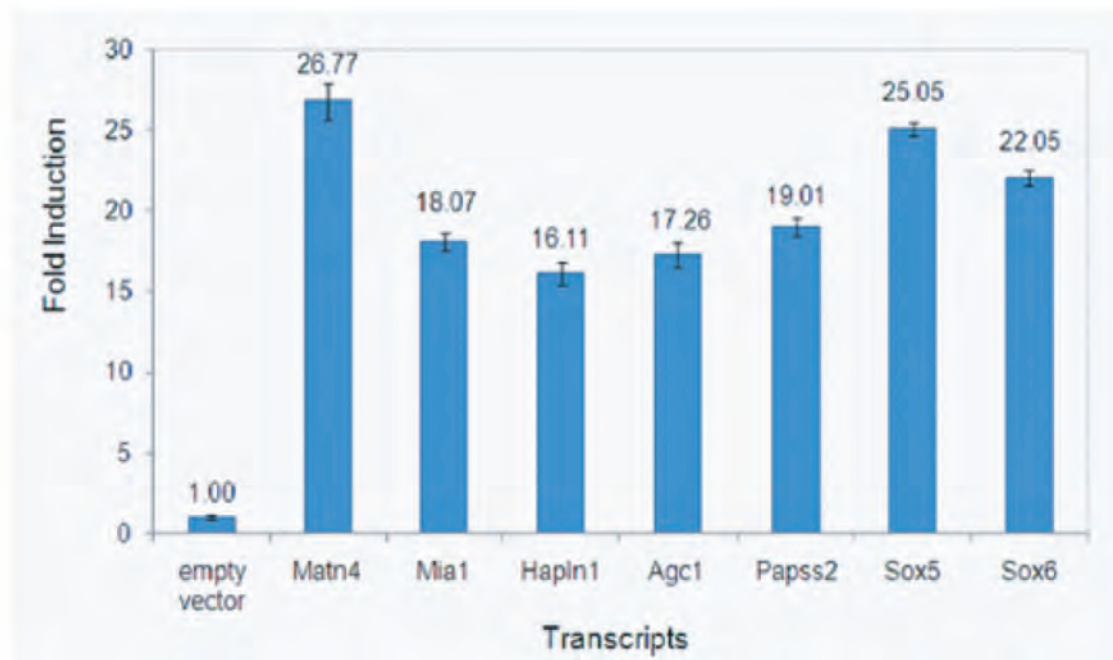

Figure S5

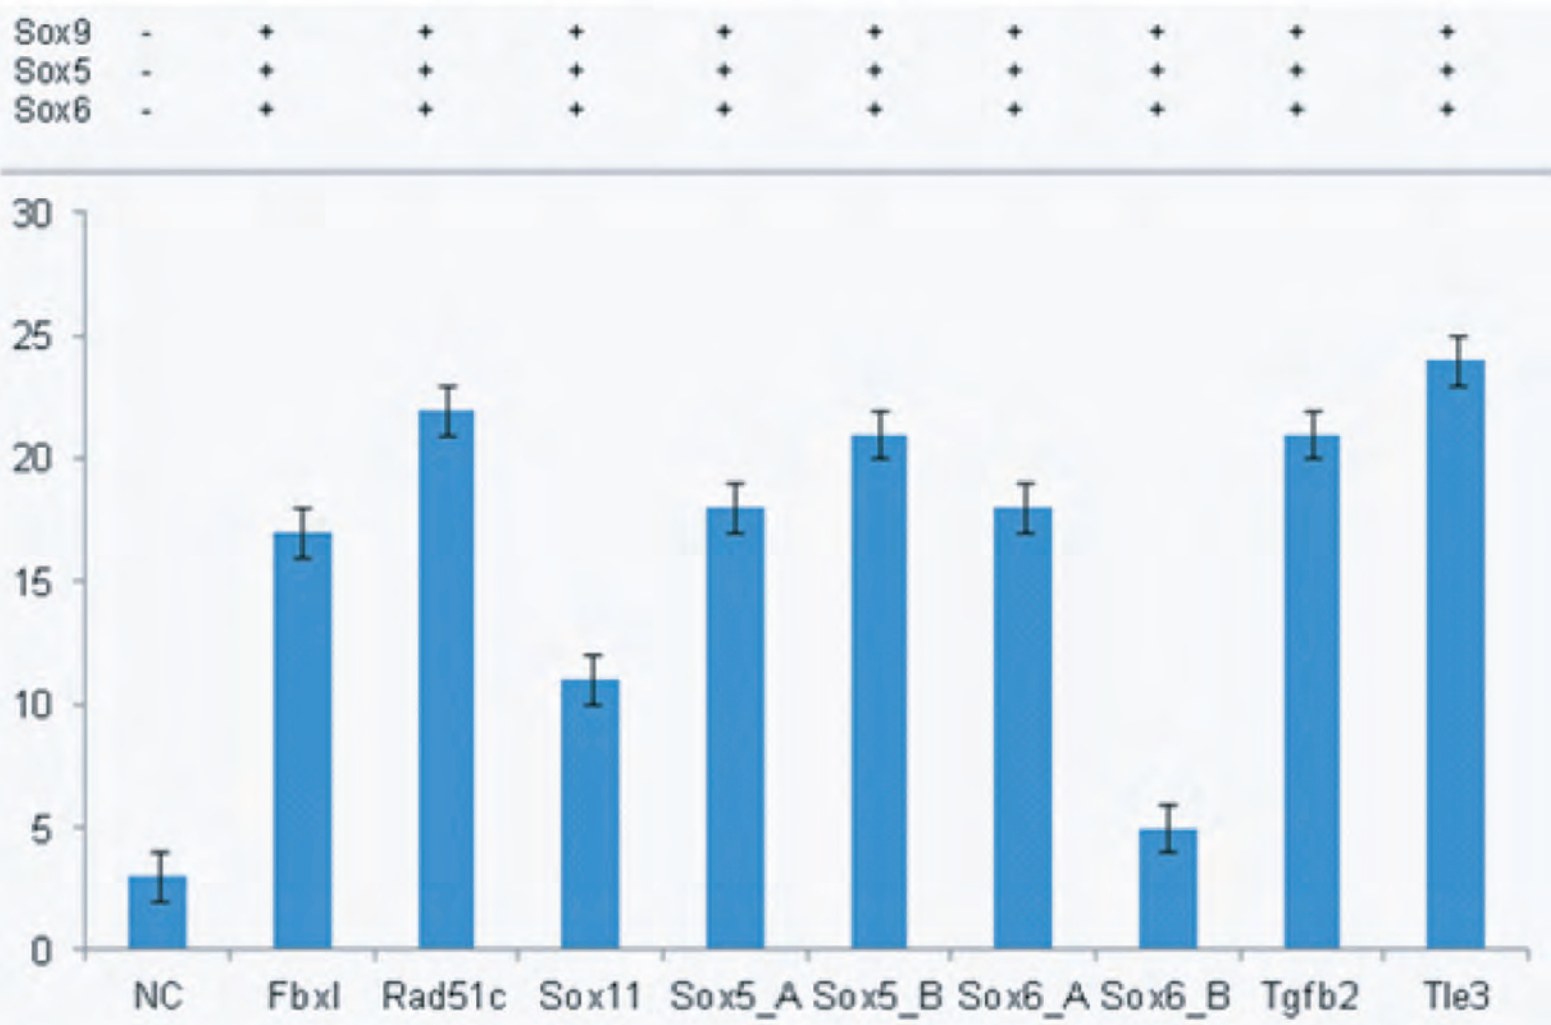

Table S1 Sox5 Sox6 (113 Pages)

| Symbol        | Corrected p-value | FCAbsolute  | Regulation |
|---------------|-------------------|-------------|------------|
| LOC100045241  | 0.000126          | 1.979569435 | down       |
| Whsc1         | 0.000126          | 3.392271519 | down       |
| Tssc8         | 0.00014           | 5.709008217 | down       |
| Hist1h2ah     | 0.000268          | 4.491474628 | down       |
| Masp2         | 0.000437          | 3.014621258 | up         |
| N4bp2         | 0.000437          | 2.461571693 | down       |
| Clcn3         | 0.000471          | 2.399149418 | down       |
| Csnk2a1-rs3   | 0.000471          | 5.857130528 | down       |
| Cort          | 0.000535          | 2.484235287 | up         |
| Rcor1         | 0.000677          | 3.296764374 | down       |
| Smchd1        | 0.000743          | 3.363729715 | down       |
| D030068E18Rik | 0.000835          | 4.346210957 | down       |
| Sema5a        | 0.000835          | 2.67321682  | up         |
| A130096D14Rik | 0.000835          | 2.049284935 | down       |
| Chic1         | 0.000835          | 4.537966251 | down       |
| Sfrs11        | 0.000835          | 3.639235735 | down       |
| Sec22c        | 0.000835          | 1.736928225 | down       |
| Tm7sf3        | 0.000835          | 10.5032444  | down       |
| Cenpf         | 0.000835          | 6.796654701 | down       |
| Srrm1         | 0.000856          | 1.515657187 | down       |
| Sox5          | 0.000856          | 6.362275124 | down       |
| Tmf1          | 0.000905          | 1.663706541 | down       |
| 2610305D13Rik | 0.000905          | 2.057766914 | down       |
| Tcfap2b       | 0.000905          | 5.2552104   | down       |
| 2810408P10Rik | 0.000905          | 3.362867355 | down       |
| Bclaf1        | 0.000905          | 1.719573617 | down       |
| Gpm6b         | 0.000905          | 2.81131506  | down       |
| Adam12        | 0.000905          | 2.027531862 | up         |
| 2700063P19Rik | 0.000905          | 4.18237114  | down       |
| 4933432B13Rik | 0.000905          | 2.330044508 | down       |
| B930006L02Rik | 0.000905          | 2.314308405 | down       |
| Ddx6          | 0.000905          | 3.059930563 | down       |
| 1110067B18Rik | 0.000905          | 1.937761426 | down       |
| Egr3          | 0.000905          | 2.336658955 | up         |
| C530036F05Rik | 0.000905          | 2.751230955 | down       |
| Lym2          | 0.000905          | 2.123450041 | down       |
| Pccb          | 0.000905          | 1.506727815 | up         |
| Anxa4         | 0.000905          | 1.867211223 | up         |
| 1110059G02Rik | 0.000905          | 3.253538132 | up         |
| Cdh10         | 0.000905          | 1.741377115 | up         |
| A730094H17Rik | 0.000905          | 1.949303627 | down       |
| Npal2         | 0.000905          | 1.52602005  | up         |
| Il16          | 0.000905          | 1.760058761 | down       |
| Sema5a        | 0.000905          | 2.359884501 | up         |
| Nrip1         | 0.000905          | 2.405695438 | down       |
| Cc1           | 0.000905          | 5.117405415 | down       |
| Hist1h2ad     | 0.000905          | 4.205818176 | down       |

|                    |             |             |      |
|--------------------|-------------|-------------|------|
| EG383436           | 0.000905    | 2.115112543 | up   |
| A730021C13Rik      | 0.000957    | 2.032049656 | down |
| Pcdh17             | 0.000957    | 1.946148992 | down |
| LOC100047419       | 0.000984    | 3.524956942 | down |
| Aoc3               | 0.000999    | 2.760412693 | up   |
| Cxxc6              | 0.000999    | 3.383396864 | down |
| Akap9              | 0.000999    | 3.478304148 | down |
| Tbl1x              | 0.000999    | 4.250277042 | down |
| Cntn2              | 0.001019442 | 7.897854805 | down |
| 5830407P18Rik      | 0.001019442 | 4.236233234 | down |
| LOC100045266       | 0.001019442 | 2.012479544 | down |
| OTTMUSG00000010673 | 0.001084496 | 3.460067511 | up   |
| Nhlrc2             | 0.001133001 | 2.536384344 | down |
| Fam107a            | 0.001133001 | 2.099262953 | up   |
| Atp7a              | 0.001188304 | 1.979646802 | down |
| C330023M02Rik      | 0.001207266 | 2.53552413  | down |
| A730036E13Rik      | 0.001207266 | 3.14649272  | down |
| B130047N10Rik      | 0.001236391 | 1.65657866  | down |
| Nrxn3              | 0.001236391 | 2.162994862 | down |
| Dct                | 0.001252045 | 7.746574402 | up   |
| Mgea5              | 0.001252045 | 1.750078559 | down |
| Abca8b             | 0.001252045 | 1.598145366 | up   |
| Ddx6               | 0.001252045 | 5.072891235 | down |
| Mlp                | 0.001252045 | 2.12168932  | down |
| Tcf4               | 0.001252045 | 1.630245209 | down |
| Mllt4              | 0.001252045 | 3.550232172 | down |
| D030017L14Rik      | 0.001252045 | 2.083675861 | down |
| Cryz               | 0.001252045 | 1.538257957 | up   |
| Pofut1             | 0.001252045 | 1.603772879 | up   |
| Pdcd4              | 0.001321057 | 8.171095848 | down |
| Twist1             | 0.001321057 | 1.775350571 | up   |
| Zdhhc21            | 0.001321057 | 2.122733355 | down |
| Cnot4              | 0.001346767 | 3.769899845 | down |
| Hnrnpk             | 0.001346767 | 1.691924214 | up   |
| Exosc10            | 0.001346767 | 3.312430859 | down |
| Casc5              | 0.001369625 | 2.576614142 | down |
| Zzz3               | 0.001384872 | 4.973208904 | down |
| Eif3a              | 0.001384872 | 2.08261323  | down |
| LOC386164          | 0.001387765 | 4.183255673 | down |
| Mfhas1             | 0.001387765 | 1.77922082  | down |
| Expi               | 0.001431931 | 2.290077686 | up   |
| Atp7a              | 0.001447044 | 3.527199984 | down |
| Gm1943             | 0.00146609  | 1.800988078 | down |
| Gpnmb              | 0.00146609  | 3.003995895 | up   |
| Masp2              | 0.00146609  | 4.408613682 | up   |
| scl0001118.1_0     | 0.001481147 | 4.556073189 | down |
| LOC381445          | 0.001481147 | 2.828824043 | down |
| B130065G19Rik      | 0.001481147 | 1.761445165 | down |

|                 |             |             |      |
|-----------------|-------------|-------------|------|
| B230339C08Rik   | 0.001481147 | 2.219897509 | down |
| 2410089E03Rik   | 0.001493363 | 2.022233725 | down |
| 4922502B01Rik   | 0.001505361 | 2.130442858 | down |
| LOC229810       | 0.001505361 | 3.544888496 | down |
| Slitrk5         | 0.00151972  | 1.690063119 | down |
| Catnb           | 0.00151972  | 4.65704155  | down |
| Slc4a7          | 0.001544275 | 3.262524128 | down |
| Casp8           | 0.001544275 | 1.512689591 | up   |
| C87860          | 0.001548931 | 2.352594614 | down |
| Tmod2           | 0.001548931 | 1.810086608 | up   |
| Sfrs11          | 0.001548931 | 4.205660343 | down |
| A230077110Rik   | 0.001548931 | 2.612783909 | down |
| Rn18s           | 0.001548931 | 28.15727615 | down |
| Cited2          | 0.001548931 | 1.61139214  | down |
| Adssl1          | 0.001548931 | 2.195277691 | up   |
| LOC636687       | 0.001548931 | 2.30185461  | down |
| 2600011E07Rik   | 0.001548931 | 4.089639187 | down |
| Nrxn2           | 0.001548931 | 3.475767374 | down |
| Hmox1           | 0.001548931 | 1.975618482 | up   |
| A530089A20Rik   | 0.001566832 | 3.25717783  | down |
| scl0001284.1_18 | 0.001566832 | 4.112894058 | down |
| Phf20           | 0.001566832 | 2.636844873 | down |
| D030064C08Rik   | 0.00158621  | 2.240285873 | down |
| Rai1            | 0.001596302 | 2.476820707 | down |
| 2210008N01Rik   | 0.001599585 | 1.590283632 | up   |
| Prpf40a         | 0.001622462 | 6.006502628 | down |
| 4833426J09Rik   | 0.001622462 | 3.022704125 | down |
| 4832404P21Rik   | 0.001622462 | 1.580677509 | down |
| Mll3            | 0.001622462 | 2.042486906 | down |
| Fgf10           | 0.001622462 | 2.72319746  | up   |
| Satb1           | 0.001622462 | 2.155455589 | down |
| Asxl3           | 0.001622462 | 3.112105608 | down |
| Thsd4           | 0.001622462 | 3.020121813 | down |
| C730009D12      | 0.001622462 | 2.332720518 | down |
| Mfap3           | 0.001622462 | 2.062714338 | down |
| 9530082I15Rik   | 0.001622462 | 2.436363936 | down |
| Cyfip1          | 0.001622462 | 1.673766494 | up   |
| 2310043D08Rik   | 0.001639069 | 2.310451031 | down |
| Nfic            | 0.001639069 | 2.677012205 | down |
| Pdpk1           | 0.001639069 | 2.793810844 | down |
| EG667728        | 0.001639069 | 4.284719467 | down |
| Tgs1            | 0.001639069 | 2.577982903 | down |
| Gcc2            | 0.001639069 | 2.556368351 | down |
| Uimc1           | 0.001649925 | 1.521978378 | down |
| Chd7            | 0.001654211 | 3.721209765 | down |
| Tcfap2b         | 0.001671571 | 5.70921278  | down |
| Gramd3          | 0.001699621 | 1.683848739 | up   |
| Hist1h2ai       | 0.001699621 | 3.275393248 | down |



|               |             |             |      |
|---------------|-------------|-------------|------|
| Grhl2         | 0.001699621 | 1.951004982 | up   |
| O610007P08Rik | 0.001699621 | 1.85313654  | down |
| D130078K04Rik | 0.001699621 | 2.518232822 | down |
| Cttnbp2       | 0.001699621 | 2.236723423 | down |
| Ctdsp2        | 0.001699621 | 1.619929195 | up   |
| 4930527B16Rik | 0.001699621 | 2.372690678 | down |
| Pqlc3         | 0.001699621 | 1.66099906  | up   |
| B230386D16Rik | 0.001699621 | 3.909979105 | down |
| Zswim6        | 0.001699621 | 3.327031136 | down |
| Bat2d         | 0.001699621 | 11.11145401 | down |
| Spag9         | 0.001699621 | 2.312184811 | down |
| Arl5b         | 0.001699621 | 1.976490736 | down |
| D230029K13Rik | 0.001699621 | 1.632989049 | up   |
| C130064E22Rik | 0.001699621 | 2.518179178 | down |
| Vmn2r-ps14    | 0.001699621 | 3.321276426 | down |
| Actb          | 0.001699621 | 2.419744492 | down |
| Hist1h2ah     | 0.001699621 | 3.9784832   | down |
| Gas7          | 0.001699621 | 2.229600668 | up   |
| Ntng1         | 0.001699621 | 2.279101133 | up   |
| Bach1         | 0.001699621 | 3.790873051 | down |
| Zfp553        | 0.001699621 | 1.862444997 | down |
| LOC386144     | 0.001699621 | 3.415578842 | down |
| Rif1          | 0.001699621 | 2.582983732 | down |
| 2310032M22Rik | 0.001699621 | 2.79638052  | down |
| Tshz1         | 0.001699621 | 2.919794083 | down |
| LOC668492     | 0.001699621 | 1.59711802  | down |
| A330049H05Rik | 0.001700977 | 6.968859673 | down |
| St8sia5       | 0.001700977 | 2.520494223 | up   |
| Trim33        | 0.001714952 | 2.696403503 | down |
| Col5a2        | 0.001714952 | 1.793847203 | up   |
| Rlf           | 0.001714952 | 2.288247347 | down |
| Gpr106        | 0.001714952 | 2.19508791  | up   |
| Rapgef5       | 0.001714952 | 4.095921993 | down |
| Zfp553        | 0.001714952 | 2.516846895 | down |
| D430007A19Rik | 0.001714952 | 3.118346214 | down |
| Hoxa7         | 0.001722037 | 2.206652403 | down |
| Ebf1          | 0.00172265  | 3.610209703 | down |
| 3110007F17Rik | 0.001776419 | 3.020109892 | down |
| 6430590A07Rik | 0.001800553 | 1.660326004 | down |
| A030010B05Rik | 0.001817547 | 1.777314305 | down |
| Pcylt1a       | 0.001817547 | 3.771603584 | down |
| Tns1          | 0.001817547 | 1.844639897 | down |
| B230323D24Rik | 0.001817547 | 1.872745156 | up   |
| Ubn1          | 0.001817547 | 1.646087647 | down |
| A430090G16Rik | 0.001817547 | 2.383386374 | down |
| Nkd2          | 0.001873706 | 2.789045095 | up   |
| C330006A16Rik | 0.001873706 | 1.781713247 | up   |
| Braf          | 0.001876352 | 1.763750553 | down |

|               |             |             |      |
|---------------|-------------|-------------|------|
| D230020C06Rik | 0.001876352 | 2.677211046 | down |
| Reep3         | 0.001902016 | 4.164883614 | down |
| Peg3          | 0.001906506 | 3.412580729 | down |
| D330022O09Rik | 0.001923039 | 2.995478153 | down |
| Cd55          | 0.00193676  | 1.56550014  | up   |
| Col20a1       | 0.001973813 | 4.662111282 | up   |
| Mki67         | 0.001973813 | 1.912924767 | down |
| C130022E19Rik | 0.001983357 | 2.944473267 | down |
| Rere          | 0.001993988 | 2.487741947 | down |
| D9Ert402e     | 0.001993988 | 2.257170439 | up   |
| LOC381891     | 0.001993988 | 1.665171385 | down |
| Tpm1          | 0.001993988 | 2.47113204  | up   |
| Atp10b        | 0.001993988 | 4.808668137 | up   |
| 1300010F03Rik | 0.001993988 | 1.556489348 | up   |
| Mfap2         | 0.001993988 | 1.812550783 | up   |
| Dcc           | 0.001993988 | 2.583023071 | down |
| Ube2b         | 0.001993988 | 1.501930594 | up   |
| Nvl           | 0.001993988 | 2.314384937 | down |
| Slco5a1       | 0.001993988 | 1.964363217 | down |
| LOC671878     | 0.001995887 | 6.171885014 | down |
| 2610319H10Rik | 0.002000658 | 2.309181452 | down |
| Srrm1         | 0.002000658 | 1.568955302 | down |
| B230208H17Rik | 0.002000658 | 3.07472229  | down |
| 2810408P10Rik | 0.002000658 | 2.048011303 | down |
| 9845300_5100  | 0.002000658 | 1.742226481 | up   |
| Hist1h2ak     | 0.002000658 | 3.852180481 | down |
| Bat2d         | 0.002000658 | 11.87066841 | down |
| Ppp1r14c      | 0.002000658 | 1.737563252 | down |
| B430201A12Rik | 0.002000658 | 3.403898001 | down |
| Rnf122        | 0.002000658 | 2.272558212 | down |
| B230213E18Rik | 0.002000658 | 2.527683497 | down |
| Rufy2         | 0.002000658 | 2.299056053 | down |
| 2010007K12Rik | 0.002000658 | 3.044680834 | down |
| Zfp148        | 0.002000658 | 2.152908802 | down |
| 2600005C20Rik | 0.002024822 | 2.9771595   | down |
| Rnf135        | 0.002067311 | 1.67632401  | up   |
| Rsrc2         | 0.0021475   | 2.5628438   | down |
| Rasip1        | 0.002152312 | 1.670943975 | up   |
| A930019L04Rik | 0.002152312 | 2.277096272 | down |
| LOC226017     | 0.002152312 | 1.719550371 | down |
| LOC100041569  | 0.002152312 | 2.351627588 | down |
| 4933417E08Rik | 0.002152312 | 2.430617333 | down |
| LOC100046781  | 0.002152312 | 2.830364466 | down |
| A930004J17Rik | 0.002152312 | 2.8519454   | down |
| Thsd1         | 0.002152312 | 1.963858008 | up   |
| Col28a1       | 0.002152312 | 2.050136805 | up   |
| Egr2          | 0.002152312 | 1.968085527 | up   |
| 6530443I23Rik | 0.002152312 | 2.353471518 | down |

|                  |             |             |      |
|------------------|-------------|-------------|------|
| Msi2h            | 0.002155256 | 2.21756196  | down |
| Psm11            | 0.002236816 | 2.703939676 | down |
| Bcor             | 0.00229542  | 1.938883066 | up   |
| scl0002975.1_346 | 0.002297732 | 6.940559864 | down |
| 1200016B10Rik    | 0.002344545 | 1.812214136 | down |
| Ddx26            | 0.002366696 | 2.24638629  | down |
| Peg3             | 0.002366696 | 3.523910761 | down |
| Csrp3            | 0.002366696 | 3.043993473 | up   |
| Klh15            | 0.002408065 | 1.673710585 | down |
| Stat3            | 0.002408065 | 4.546752453 | down |
| Mark3            | 0.002408065 | 2.442866087 | down |
| Znrf1            | 0.002408065 | 2.388609886 | down |
| Sfrs5            | 0.002424738 | 2.535691977 | up   |
| Them4            | 0.002424738 | 1.536995053 | up   |
| LOC676704        | 0.002424738 | 2.788088083 | up   |
| Msx1             | 0.002424738 | 2.461048126 | up   |
| Lgals4           | 0.002424738 | 1.728363872 | up   |
| Ift80            | 0.002424738 | 1.537944078 | up   |
| Grik1            | 0.002436229 | 1.907122612 | up   |
| Lhfp12           | 0.002439372 | 3.675370693 | up   |
| 2310007F21Rik    | 0.002439372 | 1.938352227 | down |
| Tecta            | 0.002439372 | 2.851201773 | up   |
| EG627022         | 0.002449249 | 1.757732272 | up   |
| Trim2            | 0.002516103 | 2.939060688 | down |
| LOC100043821     | 0.002520246 | 4.291506767 | down |
| Ezh2             | 0.002520495 | 3.44827652  | down |
| BC028528         | 0.002520495 | 1.583291173 | up   |
| Ddx21            | 0.00253616  | 2.607344866 | down |
| LOC100046483     | 0.002539726 | 2.432278872 | down |
| Gal3st2          | 0.002564475 | 1.659373522 | up   |
| LOC333917        | 0.002637185 | 1.822413206 | up   |
| Ap1g1            | 0.002644724 | 1.829310775 | down |
| 1810013B01Rik    | 0.002644724 | 1.71312809  | up   |
| Stard4           | 0.002678604 | 2.152586222 | down |
| Ppm1l            | 0.002678604 | 1.917000532 | down |
| LOC100048816     | 0.00269998  | 1.705911994 | up   |
| Nup188           | 0.00269998  | 1.950923562 | up   |
| Hoxb4            | 0.002712341 | 9.586476326 | down |
| Gm484            | 0.002712341 | 2.060320854 | up   |
| 2700055A20Rik    | 0.002747602 | 1.654114246 | down |
| LOC386298        | 0.002775091 | 8.970158577 | down |
| Stx4a            | 0.002784912 | 1.667314172 | up   |
| Zcchc17          | 0.002784912 | 2.049758911 | down |
| Syne2            | 0.002797721 | 3.046834946 | down |
| LOC100045679     | 0.002813986 | 2.550547361 | down |
| Alox12b          | 0.002833908 | 1.721888423 | up   |
| Appbp2           | 0.002839923 | 2.40660739  | down |
| Ncapg            | 0.002844835 | 1.8440516   | down |

|               |             |             |      |
|---------------|-------------|-------------|------|
| lqgap1        | 0.002852635 | 2.730445385 | down |
| Scrt2         | 0.002852635 | 3.080980301 | down |
| Efhd1         | 0.002852635 | 2.056644678 | up   |
| Trf           | 0.002852635 | 2.420217037 | up   |
| Xrn2          | 0.002852635 | 1.805908084 | down |
| Eif4ebp2      | 0.002852635 | 3.025116205 | down |
| Cbx3          | 0.002865495 | 3.409720898 | down |
| Pros1         | 0.002878058 | 2.084843397 | up   |
| LOC100046781  | 0.002878058 | 3.634115934 | down |
| 1700049G17Rik | 0.002886125 | 2.146261931 | down |
| A930007B11Rik | 0.0029021   | 2.288319111 | down |
| Camk2b        | 0.002968505 | 3.404276133 | up   |
| Sox5          | 0.002973807 | 4.62940979  | down |
| C8b           | 0.002977562 | 2.156763315 | up   |
| Blmh          | 0.003005815 | 1.692749858 | up   |
| Zfp668        | 0.003005815 | 1.656523585 | down |
| 2600009P04Rik | 0.003036049 | 2.49938345  | down |
| 2900083I11Rik | 0.003036049 | 2.954364061 | down |
| Gdnf          | 0.003044692 | 2.697883368 | up   |
| Igfbp4        | 0.003059143 | 2.211507082 | up   |
| 2010321I05Rik | 0.003059143 | 2.100106001 | down |
| LOC385653     | 0.003059143 | 1.824099422 | down |
| Rasal2        | 0.003085814 | 2.635222197 | down |
| Trappc3       | 0.003092976 | 2.015714407 | up   |
| LOC385063     | 0.003092976 | 1.538074255 | up   |
| Depdc6        | 0.003097231 | 2.535854816 | up   |
| Zbtb8os       | 0.003097231 | 2.524297953 | down |
| Clic4         | 0.003098282 | 1.885798574 | down |
| Fgfr1op       | 0.003100789 | 2.712619543 | down |
| Odz2          | 0.003101471 | 2.188945532 | down |
| Gad1          | 0.003101471 | 3.517460346 | down |
| Sox10         | 0.003101471 | 4.689880848 | up   |
| Cort          | 0.003101471 | 2.570096016 | up   |
| Fgf10         | 0.003101471 | 2.86425519  | up   |
| IGFBPL        | 0.003101471 | 2.645238161 | down |
| Cdc42         | 0.003105573 | 1.699200034 | up   |
| Grip1         | 0.003105573 | 1.532074928 | down |
| Golga5        | 0.003105573 | 1.562871337 | up   |
| Elovl6        | 0.003105573 | 3.462438345 | down |
| Aatk          | 0.003105573 | 2.335288048 | up   |
| 9030016H15Rik | 0.003105573 | 4.149542332 | down |
| Pdap1         | 0.003151634 | 5.496873379 | down |
| Nsd1          | 0.003151634 | 2.560655594 | down |
| Ctgf          | 0.003151634 | 5.581324577 | down |
| LOC234486     | 0.003196267 | 1.624858975 | up   |
| Cnot6l        | 0.003196267 | 1.637559295 | down |
| Adamts16      | 0.003196267 | 1.956285119 | up   |
| Mafg          | 0.003206996 | 2.137374401 | down |

|               |             |             |      |
|---------------|-------------|-------------|------|
| C730026O12Rik | 0.003226428 | 2.757518053 | down |
| Tnrc6b        | 0.003232072 | 1.850290775 | down |
| Krt23         | 0.003236658 | 2.035083771 | up   |
| St8sia1       | 0.003291511 | 1.859755993 | down |
| Ngfr          | 0.00330888  | 3.533227444 | up   |
| A230057M07Rik | 0.003358118 | 2.462555409 | down |
| Gbf1          | 0.003362038 | 2.705598354 | down |
| LOC386268     | 0.003362038 | 1.891545653 | down |
| LOC385985     | 0.003362038 | 1.871003985 | down |
| Syt9          | 0.003362038 | 1.731947303 | up   |
| Mx2           | 0.003362038 | 1.552976728 | up   |
| Socs2         | 0.003362038 | 2.229184389 | down |
| Slc30a3       | 0.003392438 | 3.175337076 | down |
| Sfxn5         | 0.003392438 | 1.69588387  | up   |
| C730037N04Rik | 0.003392438 | 1.883291602 | up   |
| LOC382128     | 0.003392438 | 2.909168959 | down |
| Dem1          | 0.003392438 | 1.932738781 | down |
| Nssr          | 0.003392438 | 3.501837015 | down |
| Rplp2         | 0.003392438 | 1.905174494 | down |
| LOC384806     | 0.003400741 | 1.686281681 | up   |
| 9430091F09Rik | 0.003424362 | 2.187004089 | down |
| Si            | 0.003476268 | 6.297748566 | up   |
| 3110045I18Rik | 0.003482583 | 1.833001494 | down |
| Thsd1         | 0.003494327 | 1.874257326 | up   |
| Pdgfrl        | 0.003520094 | 1.941183329 | up   |
| D330046C14Rik | 0.003520094 | 1.876979828 | down |
| Pigk          | 0.003565899 | 2.236676931 | up   |
| Sox5          | 0.003586253 | 1.902192593 | down |
| Zfp106        | 0.003587402 | 2.108716726 | down |
| Ccnd2         | 0.003587402 | 4.043251991 | down |
| Ophn1         | 0.003587402 | 1.766860843 | down |
| LOC100039590  | 0.003587402 | 1.735718012 | up   |
| LOC277385     | 0.003587402 | 1.559720755 | down |
| Ankhd1        | 0.003587402 | 4.114300728 | down |
| Emilin2       | 0.003587402 | 1.918661356 | up   |
| LOC332100     | 0.003593922 | 2.07954073  | up   |
| Cpne4         | 0.003619366 | 1.857071757 | up   |
| 6330408A02Rik | 0.003619366 | 1.517202377 | up   |
| LOC665047     | 0.003623013 | 1.717778564 | up   |
| Dynlt1        | 0.00364717  | 1.645379782 | up   |
| Tmem159       | 0.003718815 | 1.886527419 | up   |
| Mcoln3        | 0.003725343 | 2.695793152 | up   |
| Trfr2         | 0.003746883 | 1.591099858 | up   |
| C330013J21Rik | 0.003755712 | 1.60490334  | up   |
| 5730507C05Rik | 0.003784398 | 1.865052462 | up   |
| Hist1h2ag     | 0.003803332 | 4.092349052 | down |
| Sema3e        | 0.003851038 | 1.625473976 | up   |
| A430103B12Rik | 0.003851038 | 2.11023283  | down |

|               |             |             |      |
|---------------|-------------|-------------|------|
| Tdrd6         | 0.003851038 | 1.922942162 | up   |
| Phf20         | 0.003851038 | 2.595990419 | down |
| E330034G19Rik | 0.003851038 | 2.091925383 | up   |
| Wisp1         | 0.003851038 | 1.826170802 | up   |
| Mtmr11        | 0.003852484 | 1.810917616 | up   |
| Gprc5b        | 0.003852484 | 1.710953713 | up   |
| Slc45a2       | 0.003852484 | 1.913041115 | up   |
| Dio3          | 0.003852484 | 2.048040152 | up   |
| Olfml1        | 0.003852484 | 2.11557436  | up   |
| 4833426J09Rik | 0.003854741 | 3.128195763 | down |
| Usp1          | 0.003873624 | 2.097961426 | down |
| 4930565D16Rik | 0.00387948  | 1.980524778 | up   |
| Lysmd1        | 0.00387948  | 1.503440857 | down |
| Odc1          | 0.00387948  | 1.588709831 | down |
| Depdc6        | 0.00387948  | 1.628386498 | up   |
| Ddx31         | 0.00387948  | 1.615046024 | up   |
| LOC386218     | 0.00387948  | 2.067317009 | down |
| Slc26a4       | 0.00387948  | 1.762005448 | up   |
| D230019K20Rik | 0.00387948  | 2.04913044  | down |
| Golga2        | 0.00387948  | 3.592981577 | down |
| Prss12        | 0.003890534 | 3.801356077 | up   |
| Xkr6          | 0.003910657 | 1.549505115 | down |
| Hamp2         | 0.003910657 | 1.9332546   | up   |
| Gabarap       | 0.003955028 | 1.600666881 | down |
| Tkt           | 0.003988665 | 1.707558632 | up   |
| 2700069A02Rik | 0.003988665 | 1.632886529 | up   |
| Postn         | 0.003988665 | 2.306335211 | up   |
| Axl           | 0.003988665 | 1.744459152 | up   |
| 2310047A01Rik | 0.003988665 | 2.222008228 | up   |
| C330008K14Rik | 0.003988665 | 2.10133791  | up   |
| Ptbp2         | 0.003988665 | 2.669814825 | down |
| Mdk           | 0.003988665 | 1.70645988  | up   |
| Fmn2          | 0.003988665 | 1.803737402 | down |
| LOC386002     | 0.003989679 | 1.763634682 | down |
| Ctdsp2        | 0.003989679 | 1.791823387 | up   |
| Gs2na-pending | 0.003989679 | 1.732313633 | down |
| LOC100040573  | 0.003989679 | 1.949356914 | down |
| LOC628101     | 0.003989679 | 2.467933178 | down |
| Fmn2          | 0.003989679 | 1.898942232 | down |
| Fgfbp3        | 0.003996336 | 3.325478792 | down |
| Elmod2        | 0.00400336  | 1.708793163 | up   |
| Ccnd2         | 0.004006404 | 3.149492264 | down |
| Top2a         | 0.004030433 | 2.437822819 | down |
| Pkp2          | 0.00403371  | 1.564621568 | up   |
| Prss12        | 0.00403371  | 3.068991184 | up   |
| 4921506J03Rik | 0.004036784 | 2.013284206 | down |
| Eif5          | 0.004040268 | 2.383437872 | down |
| A130004B21Rik | 0.004042468 | 1.808148742 | down |

|                    |             |             |      |
|--------------------|-------------|-------------|------|
| Rhbdl3             | 0.004042468 | 2.234582424 | down |
| Dlx1               | 0.004042468 | 4.123897076 | up   |
| Rab3c              | 0.004064715 | 3.192802429 | down |
| Ets1               | 0.004064715 | 3.387423277 | up   |
| Hist1h2ad          | 0.004064715 | 3.079777718 | down |
| Afap1l1            | 0.004069591 | 1.846763253 | up   |
| B230345P09Rik      | 0.004103392 | 2.239587784 | down |
| A930010C08Rik      | 0.004103392 | 1.50810039  | up   |
| Pitpnm3            | 0.004104899 | 1.629771113 | up   |
| 9630055A16Rik      | 0.004105434 | 1.84425199  | down |
| Stk40              | 0.004106835 | 1.524536729 | down |
| OTTMUSG00000004551 | 0.004134541 | 2.317496061 | up   |
| Zfp445             | 0.004135276 | 6.528080463 | down |
| Palmd              | 0.004150326 | 2.123199225 | up   |
| LOC386179          | 0.004173989 | 3.148241043 | down |
| Plxnb3             | 0.004173989 | 2.010650873 | up   |
| D230034L24Rik      | 0.004173989 | 2.333503723 | down |
| Nasp               | 0.004173989 | 3.257022858 | down |
| Il28ra             | 0.004173989 | 2.330181122 | up   |
| Masp1              | 0.004173989 | 3.221175671 | down |
| 4930400K19Rik      | 0.004173989 | 1.715313435 | up   |
| Stag3              | 0.004197383 | 1.781137586 | up   |
| Raf1               | 0.00422702  | 2.488537073 | down |
| Adamts18           | 0.00424145  | 2.398599625 | up   |
| D930024N12Rik      | 0.00424468  | 2.204247713 | up   |
| Pdzd2              | 0.00424468  | 1.697885037 | up   |
| Hist1h2af          | 0.00424468  | 3.017111778 | down |
| Ndst1              | 0.00424468  | 1.687913656 | down |
| 6030408C04Rik      | 0.00424468  | 1.727607727 | down |
| B830007D08Rik      | 0.00424468  | 1.861119866 | down |
| Sipa1              | 0.00424468  | 1.815942884 | up   |
| Il15               | 0.00424468  | 1.798205018 | up   |
| C130040D06Rik      | 0.00424468  | 1.62017858  | down |
| 4931403I22Rik      | 0.00424468  | 1.816438913 | down |
| 3110007F17Rik      | 0.004260927 | 2.347302675 | down |
| Celsr2             | 0.004260927 | 3.531636953 | down |
| 2210018M11Rik      | 0.004279594 | 1.521722674 | up   |
| C030014C12Rik      | 0.00428007  | 2.566443443 | down |
| Lcn8               | 0.00428007  | 1.591693759 | up   |
| Hnrnpa2b1          | 0.00428007  | 1.727271676 | up   |
| Adssl1             | 0.00428007  | 2.078445435 | up   |
| scl0070954.1_214   | 0.00428007  | 1.957226753 | down |
| Rsrc1              | 0.00428007  | 4.078332424 | down |
| Slc45a2            | 0.00430863  | 1.967946529 | up   |
| Orc2l              | 0.00430863  | 1.668040276 | up   |
| Ypel5              | 0.004327614 | 1.505259752 | down |
| 1200008A14Rik      | 0.004333043 | 2.136365891 | down |
| Nnmt               | 0.004333043 | 2.223613977 | up   |

|                 |             |             |      |
|-----------------|-------------|-------------|------|
| HPBRII4         | 0.004333043 | 2.380132437 | down |
| D930014N22Rik   | 0.004333043 | 1.923139691 | down |
| Sep-03          | 0.004333043 | 3.362284899 | down |
| A230057G18Rik   | 0.004342289 | 2.102051497 | down |
| Nrxn3           | 0.004357657 | 2.003535509 | down |
| Psemb2          | 0.004357657 | 1.822611094 | up   |
| Mex3a           | 0.004363656 | 3.356859446 | down |
| LOC100043402    | 0.004363656 | 7.329141114 | down |
| Rufy3           | 0.004363656 | 1.619865298 | down |
| Ffar3           | 0.004363656 | 1.757079363 | up   |
| 3300001P08Rik   | 0.004363656 | 2.557412148 | down |
| Fnip1           | 0.004363656 | 1.972114444 | down |
| Nrxn3           | 0.004363656 | 3.034490824 | down |
| 2310057M21Rik   | 0.004363656 | 1.765078068 | up   |
| Casp2           | 0.004368847 | 1.834133387 | down |
| Nfe2l3          | 0.004368847 | 1.547719479 | up   |
| Klf12           | 0.004368847 | 1.812991619 | down |
| Dnajc7          | 0.004368847 | 1.837562919 | up   |
| Wdr6            | 0.004368847 | 1.67057097  | down |
| 9030612M13Rik   | 0.004381892 | 1.901643038 | down |
| Mrgprf          | 0.004392166 | 1.802424312 | up   |
| Ralb            | 0.004395306 | 1.624117613 | up   |
| Arhgap24        | 0.004425271 | 1.760208368 | up   |
| scl0002690.1_1  | 0.004434391 | 1.926185727 | up   |
| Nalcn           | 0.004438524 | 1.715703368 | up   |
| 4921518A06Rik   | 0.004442342 | 1.753007293 | down |
| LOC386360       | 0.004457909 | 2.948600054 | down |
| LOC386199       | 0.004457909 | 7.661334992 | down |
| Tnfrsf19        | 0.004457909 | 1.982052088 | up   |
| Lipf            | 0.004457909 | 3.143088102 | up   |
| Nlrp14          | 0.004460373 | 1.65374589  | up   |
| Hectd1          | 0.004460373 | 6.389221191 | down |
| Mll3            | 0.004460512 | 2.595492125 | down |
| Pten            | 0.00447098  | 2.432378292 | down |
| Ep300           | 0.004473693 | 2.288798809 | down |
| Chd4            | 0.00449493  | 2.537227631 | down |
| C030009J22Rik   | 0.00449493  | 1.791762471 | up   |
| scl0001259.1_60 | 0.004500159 | 1.783114553 | up   |
| H2afy2          | 0.00450229  | 1.929085732 | up   |
| 9030227G01Rik   | 0.00450229  | 1.633226037 | down |
| 6330404F12Rik   | 0.00450229  | 1.706807613 | down |
| Alx3            | 0.00450229  | 1.506923556 | up   |
| Rab7l1          | 0.00450229  | 1.946507812 | up   |
| Kif15           | 0.004538247 | 1.9450984   | down |
| Pdlim1          | 0.004565872 | 3.782613516 | up   |
| Eif4a2          | 0.004565872 | 1.96769321  | up   |
| Btn1a1          | 0.004571454 | 1.923624635 | up   |
| Rrp1b           | 0.0045816   | 2.953103781 | down |



|               |             |             |      |
|---------------|-------------|-------------|------|
| Meis1         | 0.0045816   | 2.1638093   | down |
| A930002H24Rik | 0.004586838 | 1.719869375 | up   |
| LOC100048413  | 0.004586838 | 1.599472284 | down |
| Usp33         | 0.004586838 | 3.03154397  | down |
| Stat6         | 0.004586838 | 1.68626821  | up   |
| Slco3a1       | 0.004586838 | 1.509677291 | up   |
| Fv1           | 0.004586838 | 1.869678617 | up   |
| LOC381151     | 0.004597899 | 1.573311806 | down |
| Fzd5          | 0.004597899 | 3.699457407 | up   |
| Angptl4       | 0.004597899 | 2.096686363 | up   |
| Fgfbp3        | 0.004597899 | 4.066598415 | down |
| Bach2         | 0.004597899 | 3.964662314 | down |
| Gpr17         | 0.004597899 | 3.242673874 | up   |
| Gfra3         | 0.004598572 | 3.552607775 | up   |
| Rbbp2         | 0.004598572 | 1.731868744 | down |
| Cd200         | 0.004601521 | 2.365979672 | up   |
| LOC381739     | 0.004603106 | 1.69522655  | down |
| Aldh1a3       | 0.004627538 | 2.671280623 | up   |
| Bcam          | 0.004627538 | 1.691012144 | up   |
| Mtap6         | 0.004627538 | 2.106295824 | down |
| Cyp39a1       | 0.004627538 | 1.605235815 | up   |
| Wdr5          | 0.004627538 | 1.588445306 | down |
| LOC100046883  | 0.004655968 | 2.968738556 | up   |
| 4933439C20Rik | 0.004655968 | 3.286760092 | down |
| Hist1h2af     | 0.004655968 | 4.633497238 | down |
| Snx27         | 0.004655968 | 2.50328517  | down |
| Gna13         | 0.004667085 | 2.552011967 | down |
| Ppp3ca        | 0.004671362 | 1.813813686 | down |
| A830092P18Rik | 0.004671362 | 1.51265657  | down |
| Smpx          | 0.004689072 | 1.57802403  | up   |
| Zbtb43        | 0.004705825 | 1.869483829 | down |
| Gab3          | 0.004711352 | 1.770696521 | up   |
| Stard5        | 0.004716454 | 1.91793406  | up   |
| 2310043I08Rik | 0.004716454 | 1.756198764 | up   |
| 1810043M20Rik | 0.004734241 | 2.402331591 | down |
| C730004I03Rik | 0.004734241 | 2.080106497 | down |
| Dhh           | 0.004734241 | 3.853497744 | up   |
| Usp37         | 0.004734241 | 2.824853897 | down |
| Tapbp         | 0.004734241 | 1.739006877 | up   |
| Auts2         | 0.004743735 | 3.004128218 | down |
| Ddx58         | 0.004751281 | 1.568745971 | up   |
| Adrb2         | 0.004757195 | 1.594719172 | up   |
| Meg3          | 0.004757195 | 2.333277702 | down |
| LOC236060     | 0.004776551 | 2.06487155  | up   |
| Adamts18      | 0.004776551 | 2.357272148 | up   |
| EG232599      | 0.004785434 | 1.530244112 | up   |
| Skap2         | 0.004795559 | 2.074286223 | down |
| A430037M23Rik | 0.004814238 | 1.548640847 | down |

|               |             |             |      |
|---------------|-------------|-------------|------|
| Efcab5        | 0.004824178 | 1.894885778 | up   |
| Srrp          | 0.004828567 | 1.715488672 | up   |
| Htra1         | 0.004829389 | 2.11162734  | up   |
| LOC100047261  | 0.004832887 | 2.417116404 | up   |
| Cthrc1        | 0.004832887 | 1.708385348 | up   |
| Hkdc1         | 0.004842994 | 1.629693627 | up   |
| Rttn          | 0.004842994 | 2.071027756 | down |
| Usp1          | 0.004850945 | 2.008660793 | down |
| Sox11         | 0.004870411 | 2.488309383 | down |
| A930006A19Rik | 0.004893755 | 1.86356926  | down |
| Pdcd5         | 0.004893755 | 1.530370951 | up   |
| C230075M21Rik | 0.004893755 | 1.976967335 | down |
| Phf21b        | 0.004893755 | 1.757664919 | down |
| Tmc6          | 0.004893755 | 2.202062845 | up   |
| Pscd3         | 0.004893755 | 1.602603078 | up   |
| Eif4e         | 0.004893755 | 2.347019672 | down |
| Pkig          | 0.004893755 | 2.022256851 | up   |
| Fmo1          | 0.004893956 | 3.091035128 | up   |
| Olig1         | 0.004897203 | 5.111002445 | down |
| Gatad2b       | 0.004900901 | 2.021556139 | down |
| 4632427E13Rik | 0.004912466 | 2.964967728 | down |
| Insc          | 0.004926327 | 6.45871973  | up   |
| 6030446B09Rik | 0.00494496  | 1.571084023 | up   |
| Robo1         | 0.004948861 | 1.873947024 | down |
| Sostdc1       | 0.004948861 | 2.06722784  | up   |
| Tcerg1        | 0.004948861 | 1.740078449 | down |
| Vsnl1         | 0.004948861 | 2.174836397 | up   |
| Cilp2         | 0.004948861 | 1.771610737 | up   |
| Gas5          | 0.004948861 | 1.75621593  | up   |
| 2810474O19Rik | 0.004948861 | 5.535286427 | down |
| Aldh3a2       | 0.004948861 | 1.929371238 | up   |
| Zfp326        | 0.004948861 | 2.000721216 | down |
| BC030863      | 0.004948861 | 1.570042849 | up   |
| Chpf          | 0.004948861 | 1.853567362 | down |
| 4833414E09Rik | 0.004948861 | 2.671931267 | down |
| Nipbl         | 0.004953511 | 2.361480951 | down |
| RbmX          | 0.004961778 | 1.734710574 | down |
| 1520401A03Rik | 0.004973099 | 1.746812582 | up   |
| Actl6a        | 0.004973751 | 2.658664465 | down |
| LOC384362     | 0.004981522 | 1.816571236 | up   |
| Nol3          | 0.004981522 | 1.722426415 | up   |
| Col6a1        | 0.004981522 | 2.340614796 | up   |
| Vwa2          | 0.004981522 | 1.675891042 | up   |
| LOC245668     | 0.004991073 | 1.703509927 | down |
| Gss           | 0.004998614 | 1.652871847 | up   |
| Pcdh19        | 0.005000604 | 1.512954831 | up   |
| Pole2         | 0.005042526 | 1.681133509 | down |
| Cldn2         | 0.005042526 | 1.802921772 | up   |

|               |             |             |      |
|---------------|-------------|-------------|------|
| LOC382362     | 0.005050725 | 1.586464882 | up   |
| Dscr3         | 0.005050725 | 1.569319129 | up   |
| Slc7a11       | 0.005050725 | 1.724648714 | up   |
| Adamts9       | 0.005050725 | 2.108854771 | up   |
| LOC383078     | 0.005050725 | 1.950703144 | up   |
| C130071C03Rik | 0.005050725 | 1.865056992 | down |
| B130018P07Rik | 0.005050725 | 1.690133095 | down |
| Ahnak         | 0.005093016 | 1.763386846 | up   |
| Klc1          | 0.005121896 | 2.019265175 | down |
| Ctf1          | 0.005124364 | 1.802195549 | up   |
| LOC100047583  | 0.005138603 | 2.430857182 | up   |
| D230021F18Rik | 0.005140017 | 1.867432475 | up   |
| Nfic          | 0.005145176 | 1.655638099 | down |
| Agtrap        | 0.005146599 | 1.963665724 | down |
| Mllt10        | 0.005146599 | 2.038018942 | down |
| BC031575      | 0.005168764 | 2.099843264 | down |
| Metap1        | 0.005185254 | 1.774073601 | down |
| Hoxb3         | 0.005185254 | 2.653430224 | down |
| A330078B09Rik | 0.005185254 | 1.544308305 | up   |
| 4930429B21Rik | 0.005185254 | 1.868144989 | up   |
| Lmo4          | 0.005185254 | 2.143743992 | down |
| Cgrrf1        | 0.005185254 | 1.553932667 | up   |
| Pdik1l        | 0.005185254 | 1.953572273 | down |
| Tcf12         | 0.005185254 | 2.977221966 | down |
| 1700094D03Rik | 0.005198562 | 1.54252398  | down |
| Zfp106        | 0.005198562 | 1.973884344 | down |
| Trhde         | 0.005198562 | 2.109780312 | up   |
| Mup2          | 0.005198562 | 1.523922443 | up   |
| Lrig1         | 0.005203011 | 1.621649146 | up   |
| LOC331507     | 0.005203011 | 2.20334053  | down |
| Rapef5        | 0.00520531  | 1.954174519 | down |
| A030011F13Rik | 0.00520828  | 1.653781176 | down |
| Slc35f4       | 0.005210541 | 1.797384501 | up   |
| Chl1          | 0.005226567 | 1.921963215 | down |
| Slc4a8        | 0.005226567 | 1.742372155 | up   |
| 6330505N24Rik | 0.005229767 | 2.759076119 | up   |
| 1200002N14Rik | 0.005237064 | 1.83902657  | up   |
| Sec22c        | 0.005247693 | 1.569401503 | down |
| Best1         | 0.005259762 | 1.740502596 | up   |
| Wbscr14       | 0.005262208 | 1.878883004 | up   |
| Parp14        | 0.005262208 | 3.012121201 | up   |
| Rtn4          | 0.005262208 | 1.835431218 | up   |
| Vamp8         | 0.005262208 | 1.797014237 | up   |
| Cdh19         | 0.005262208 | 2.516232729 | up   |
| A730098D12Rik | 0.005262208 | 1.594929934 | down |
| Uchl3         | 0.005262208 | 1.79935813  | down |
| LOC386117     | 0.005262208 | 2.390728474 | down |
| Neto1         | 0.005262208 | 1.735059023 | up   |

|                |             |             |      |
|----------------|-------------|-------------|------|
| Edg5           | 0.005262208 | 1.766367674 | up   |
| Afap1l2        | 0.005285901 | 1.825451851 | up   |
| Meis3          | 0.005285901 | 1.73090148  | down |
| Rem2           | 0.005285901 | 1.555891156 | down |
| D630043K02Rik  | 0.005285901 | 1.862826586 | up   |
| Zfp131         | 0.005293127 | 1.94246161  | down |
| Brd2           | 0.005293809 | 3.862645149 | down |
| Klf7           | 0.005293809 | 2.45822978  | down |
| Cck            | 0.005326394 | 1.699229956 | up   |
| Lmbr1          | 0.005326394 | 2.06909132  | down |
| Mtap2          | 0.005326394 | 2.897240162 | down |
| Csnk1g3        | 0.005331163 | 1.628932357 | down |
| 9430064K01Rik  | 0.005331163 | 2.687591076 | down |
| B230340J04Rik  | 0.005338991 | 1.56095326  | down |
| Kpna1          | 0.005357154 | 1.551834703 | down |
| Trp53i11       | 0.005358178 | 2.236171961 | down |
| 2610030H06Rik  | 0.005358178 | 2.189422607 | down |
| Plekha5        | 0.005381373 | 1.954667211 | down |
| Cnih4          | 0.005397065 | 2.013272047 | down |
| LOC383101      | 0.005399176 | 1.850438118 | up   |
| Snap23         | 0.005403684 | 1.558082461 | up   |
| A830009P14Rik  | 0.005412018 | 1.590291023 | up   |
| Zmiz1          | 0.005412018 | 2.562799931 | down |
| C430002P19Rik  | 0.00541515  | 1.639683843 | up   |
| scl0004190.1_3 | 0.005415535 | 5.637984276 | down |
| 2610034M16Rik  | 0.005427    | 2.208107948 | up   |
| Meis1          | 0.005427    | 1.565403462 | down |
| Mfap5          | 0.005427    | 2.247203112 | up   |
| Ryr3           | 0.005427    | 1.800640822 | up   |
| Ppfibp2        | 0.005427    | 1.914390922 | up   |
| Lin7a          | 0.005427    | 1.879538298 | down |
| Rnf135         | 0.005427    | 1.93558228  | up   |
| B230343A10Rik  | 0.005427    | 3.068618298 | up   |
| Tmc6           | 0.005427    | 2.330271721 | up   |
| Heph           | 0.005427    | 2.259020329 | up   |
| Rbm8a          | 0.005427    | 1.543013811 | down |
| Nktr           | 0.005431587 | 2.454688311 | down |
| C130023A14Rik  | 0.005506493 | 2.062721014 | down |
| 4921505C17Rik  | 0.005506493 | 1.628192067 | down |
| Zfp1           | 0.005506493 | 1.69206357  | down |
| Palmd          | 0.005506493 | 2.522102594 | up   |
| Ier3           | 0.005507129 | 1.763753891 | up   |
| Oxr1           | 0.005516001 | 1.74464941  | up   |
| Epb4.1l2       | 0.005516572 | 1.960246444 | down |
| Crybb3         | 0.005529006 | 1.63102138  | up   |
| A630064D23Rik  | 0.005544541 | 1.728334665 | up   |
| Trappc3        | 0.005557003 | 2.023467064 | up   |
| Srpk3          | 0.005565666 | 1.944763541 | up   |

|               |             |             |      |
|---------------|-------------|-------------|------|
| Rcn3          | 0.005565666 | 1.58309114  | up   |
| Gadd45g       | 0.005565666 | 2.253056765 | down |
| Eng           | 0.005565666 | 1.68507874  | up   |
| 2600011C06Rik | 0.005594803 | 2.700891972 | down |
| Pou4f1        | 0.005600505 | 3.066137791 | down |
| Metrn1        | 0.005602825 | 1.525995374 | up   |
| Edg7          | 0.005602825 | 1.699133992 | up   |
| Mbp           | 0.005602825 | 2.937065363 | up   |
| Gcs1          | 0.005602825 | 1.972009659 | down |
| Zfp820        | 0.005602825 | 1.56748879  | up   |
| Mapkapk3      | 0.005602825 | 1.707570195 | up   |
| Ndor1         | 0.005602825 | 1.804365635 | up   |
| Klhl30        | 0.005602825 | 2.35766077  | up   |
| Dnajc5b       | 0.005602825 | 1.910481453 | up   |
| 9630028G16Rik | 0.005605367 | 1.684952855 | up   |
| EG245651      | 0.005605367 | 1.52816689  | up   |
| Kif13a        | 0.005605367 | 1.524483919 | up   |
| Camk2d        | 0.005605367 | 1.736002922 | up   |
| Pgk1          | 0.005610062 | 1.874397755 | up   |
| Rbpms         | 0.005624093 | 1.854561448 | up   |
| LOC100045484  | 0.005636469 | 4.588802338 | up   |
| Phldb2        | 0.005636469 | 1.582591534 | up   |
| Enah          | 0.005636469 | 2.390565872 | down |
| Pou2f1        | 0.005640426 | 1.96668911  | down |
| LOC100047888  | 0.005640426 | 2.109181404 | down |
| LOC270589     | 0.005640426 | 12.62540245 | down |
| A230057E24Rik | 0.005640426 | 1.830949187 | down |
| Elavl3        | 0.005640426 | 1.840135336 | down |
| Fam20a        | 0.005640426 | 2.370486736 | up   |
| Vezt          | 0.005640426 | 1.987881064 | down |
| Aldh3b1       | 0.005640426 | 1.684391022 | up   |
| Lef1          | 0.005640426 | 1.844891191 | up   |
| Nme2          | 0.005657101 | 1.696917296 | up   |
| Sox6          | 0.005714556 | 2.446631193 | down |
| Leprel1       | 0.005714556 | 1.809220314 | up   |
| Tbc1d2b       | 0.005730511 | 1.600965858 | up   |
| Scg2          | 0.005730511 | 2.221801043 | up   |
| LOC381524     | 0.005730511 | 1.606394172 | up   |
| Bcl6b         | 0.005730511 | 1.802271843 | up   |
| 4932408C11Rik | 0.005730511 | 1.609389067 | up   |
| Tmprss2       | 0.005730511 | 2.118969917 | up   |
| Blvrb         | 0.005730511 | 1.588738442 | up   |
| Heph          | 0.005730511 | 3.076563358 | up   |
| Robo3         | 0.005730511 | 2.499913693 | down |
| Mtrr          | 0.005742189 | 1.570049286 | up   |
| Mtf2          | 0.005742189 | 2.279771328 | down |
| Sft2d2        | 0.005742346 | 1.930163026 | up   |
| Thsd7b        | 0.005742346 | 2.112111569 | up   |

|                 |             |             |      |
|-----------------|-------------|-------------|------|
| Lgr6            | 0.005742346 | 1.99344039  | up   |
| Lgi4            | 0.005742346 | 3.417974472 | up   |
| Abi3bp          | 0.005742346 | 2.414456606 | up   |
| Gmfb            | 0.005766725 | 1.870676756 | down |
| F8              | 0.005766725 | 1.691141486 | up   |
| Anxa4           | 0.005766725 | 1.544162273 | up   |
| Copg1           | 0.005766725 | 1.927163839 | up   |
| D6Wsu116e       | 0.005769094 | 1.81710422  | up   |
| Egfl8           | 0.005774987 | 1.952938795 | up   |
| Trim21          | 0.005780984 | 1.836067081 | up   |
| Zfp804a         | 0.005794081 | 1.961005211 | down |
| Gls2            | 0.005794081 | 1.619387507 | up   |
| Slc22a18        | 0.005794081 | 1.672028542 | up   |
| 5930437C20Rik   | 0.005794081 | 1.914514542 | down |
| Setd4           | 0.005794081 | 1.749804497 | up   |
| C230055K21Rik   | 0.005794081 | 2.029025555 | down |
| Acbd4           | 0.005794081 | 1.550271988 | up   |
| Megf10          | 0.005794081 | 3.052629471 | up   |
| 2210418G03Rik   | 0.005794081 | 1.695583224 | up   |
| Zfp185          | 0.005830702 | 2.167747736 | up   |
| Cenpf           | 0.005904581 | 2.440191984 | down |
| A330057G13Rik   | 0.00596557  | 2.619669676 | down |
| 1500034J01Rik   | 0.006068948 | 1.630295873 | down |
| C330006D17Rik   | 0.006077457 | 2.173792124 | down |
| Tnfsf12-tnfsf13 | 0.006077457 | 1.538737059 | up   |
| LOC243368       | 0.006077457 | 1.941149592 | up   |
| Cdh6            | 0.006077457 | 4.927514076 | up   |
| Col10a1         | 0.006091377 | 2.159101963 | up   |
| Lrrc15          | 0.006091377 | 1.567529798 | up   |
| Nudt7           | 0.006091377 | 1.800465822 | up   |
| Cdkn2b          | 0.006091377 | 1.740302086 | up   |
| Centd3          | 0.006091377 | 2.447141409 | up   |
| Lamc1           | 0.006091377 | 1.921959519 | up   |
| Rnase4          | 0.006091377 | 2.284752607 | up   |
| Aclp7           | 0.006120202 | 1.690021277 | up   |
| Olfir66         | 0.006123345 | 1.706213474 | up   |
| P2rx4           | 0.006133485 | 1.720799327 | up   |
| AV249152        | 0.006145213 | 1.651141524 | up   |
| C330018M05Rik   | 0.006152857 | 1.703523755 | up   |
| Sox5            | 0.006152857 | 2.341292381 | down |
| Snx27           | 0.006152857 | 2.400335074 | down |
| B130052F17Rik   | 0.006152857 | 1.904535532 | down |
| H2afy           | 0.006152857 | 1.844942689 | down |
| 2310043N10Rik   | 0.006152857 | 1.825740695 | down |
| Gzmd            | 0.006164147 | 1.56538713  | up   |
| 6430527G18Rik   | 0.006164147 | 2.4160676   | down |
| 9530095P18Rik   | 0.006164147 | 1.648895979 | up   |
| Mboat2          | 0.006164147 | 2.754043102 | down |

|               |             |             |      |
|---------------|-------------|-------------|------|
| Chmp1b        | 0.006170394 | 1.647567391 | down |
| Grm1          | 0.006170394 | 1.608059526 | up   |
| 2010001J22Rik | 0.006170394 | 1.755378485 | up   |
| Itgb6         | 0.006170394 | 1.661608934 | up   |
| Adam15        | 0.006170394 | 1.86102283  | up   |
| Abcc9         | 0.006183874 | 1.529268026 | up   |
| Sp6           | 0.006183874 | 1.741514564 | up   |
| Prss18        | 0.006187691 | 1.875510454 | up   |
| Twistnb       | 0.006196451 | 3.508275986 | down |
| Sfrs15        | 0.006210886 | 2.035793304 | down |
| Tapbp1        | 0.006210886 | 1.579133391 | up   |
| Tmsb10        | 0.006210886 | 1.593579888 | down |
| Unc5c         | 0.006210886 | 1.731092215 | down |
| Itih3         | 0.006210886 | 1.998142004 | up   |
| BC005624      | 0.006210886 | 1.732021689 | up   |
| S1pr3         | 0.006210886 | 1.749848127 | up   |
| Adamts13      | 0.006210886 | 2.042346239 | up   |
| LOC231620     | 0.006210886 | 1.805250645 | up   |
| 9630061B06Rik | 0.006220574 | 1.717678309 | up   |
| Acly          | 0.006220574 | 1.688016772 | down |
| 1110003F05Rik | 0.006271072 | 1.819800019 | up   |
| LOC245545     | 0.006271105 | 1.70277071  | up   |
| Arrdc1        | 0.006272468 | 1.702329874 | up   |
| 9030607L17Rik | 0.006280317 | 1.715411186 | up   |
| LOC674195     | 0.006280317 | 1.68887043  | up   |
| Txndc1        | 0.006280317 | 1.639881969 | up   |
| D030029G14Rik | 0.006280317 | 1.692007661 | up   |
| Atf3          | 0.006280317 | 1.596185684 | up   |
| 4930529M08Rik | 0.006280317 | 1.572241664 | up   |
| B130040C13Rik | 0.006280317 | 1.857302547 | up   |
| BC005624      | 0.006280317 | 1.620916247 | up   |
| 1300003B13Rik | 0.006285865 | 1.730767608 | up   |
| LOC380844     | 0.006314359 | 1.502296686 | up   |
| Hapln1        | 0.006314359 | 8.148877144 | down |
| Rpe65         | 0.006323306 | 1.505985856 | up   |
| LOC386288     | 0.00635571  | 8.322160721 | down |
| 3110050L10Rik | 0.006373179 | 2.385466099 | down |
| Rif1          | 0.006375426 | 1.705016971 | down |
| C430014K22Rik | 0.006376337 | 1.992624044 | down |
| Arpc5         | 0.006381696 | 2.671667814 | up   |
| LOC100044708  | 0.006383176 | 1.756627321 | up   |
| 2700046A07Rik | 0.006395905 | 1.586668968 | up   |
| Irf6          | 0.006396025 | 4.210696697 | up   |
| LOC333751     | 0.006401515 | 1.915848732 | down |
| LOC100048331  | 0.006401515 | 1.725289702 | up   |
| Nmu           | 0.006405504 | 1.700039864 | up   |
| B130018F13Rik | 0.006434305 | 2.144836903 | down |
| Abhd5         | 0.006434305 | 1.856976986 | up   |

|                 |             |             |      |
|-----------------|-------------|-------------|------|
| Hoxa13          | 0.006434305 | 1.560345769 | up   |
| Akap12          | 0.006434305 | 1.908554912 | up   |
| Olfra419        | 0.006434305 | 1.833456516 | up   |
| Lphn1           | 0.006434305 | 2.254355192 | down |
| Nfib            | 0.006436858 | 2.964277744 | down |
| E330013P04Rik   | 0.006436858 | 1.579671145 | up   |
| 1700029G01Rik   | 0.006436858 | 2.582047463 | up   |
| Prom2           | 0.006442905 | 1.61573267  | up   |
| Scara5          | 0.006442905 | 2.956916332 | up   |
| Hist1h2ai       | 0.006458707 | 2.9195292   | down |
| Dpf1            | 0.006460445 | 1.532499075 | up   |
| Snx30           | 0.006492721 | 1.611051083 | down |
| Tpm1            | 0.006495196 | 1.721640348 | up   |
| Rasd2           | 0.006505511 | 1.682884097 | up   |
| Sh3kbp1         | 0.006505511 | 1.640888691 | up   |
| Ndr3            | 0.006505511 | 1.535937429 | up   |
| Nktr            | 0.006518775 | 3.614581347 | down |
| Mcm7            | 0.006534044 | 3.058141708 | down |
| Krt18           | 0.006534044 | 1.778751135 | up   |
| Plcb3           | 0.006534044 | 1.722563744 | up   |
| 4930579E17Rik   | 0.006534044 | 1.539593458 | up   |
| Crym            | 0.006534044 | 2.929093599 | up   |
| Sep-11          | 0.006534044 | 1.5313164   | down |
| Ccdc47          | 0.006534044 | 1.832548142 | up   |
| LOC674706       | 0.006534044 | 1.549422741 | down |
| Atp6ap1         | 0.006534044 | 1.529991746 | up   |
| Cnp             | 0.006534044 | 3.567034721 | up   |
| 2610036L11Rik   | 0.006559932 | 1.65525651  | down |
| 1700019D03Rik   | 0.006559932 | 1.755156875 | up   |
| Hsd17b12        | 0.006583273 | 1.627995014 | down |
| Alox15          | 0.006584859 | 1.722136021 | up   |
| B230219J02Rik   | 0.006584859 | 1.635278344 | up   |
| Mll5            | 0.006584859 | 2.700719357 | down |
| Ppp2ca          | 0.006584859 | 1.536321878 | up   |
| Nell2           | 0.006600254 | 2.951565743 | down |
| Adamts1         | 0.006614545 | 3.106287241 | up   |
| 2410008K03Rik   | 0.006629752 | 1.837318778 | up   |
| D11Lgp2e        | 0.006629752 | 1.724197388 | up   |
| 2310014F06Rik   | 0.006629752 | 2.257092238 | up   |
| LOC666038       | 0.006629752 | 1.760875225 | up   |
| scl0003901.1_33 | 0.006629752 | 1.526523948 | up   |
| E2f2            | 0.006629752 | 1.762496948 | down |
| Atf7ip          | 0.006629752 | 3.180575371 | down |
| 4921513O20Rik   | 0.006629752 | 1.663370132 | up   |
| Sertad2         | 0.006629752 | 1.950149417 | down |
| Kcna6           | 0.006629752 | 1.818800926 | up   |
| Tnfaip2         | 0.006629752 | 2.049736977 | up   |
| Lpin2           | 0.006647016 | 1.651542187 | up   |



|               |             |             |      |
|---------------|-------------|-------------|------|
| Calr3         | 0.006692842 | 1.62598145  | up   |
| Hist2h2ab     | 0.006701651 | 6.196415901 | down |
| Cacna2d1      | 0.006717011 | 2.062205315 | down |
| Ctnnb1        | 0.006725502 | 1.81031704  | up   |
| Zfx3          | 0.006725502 | 2.569363833 | down |
| Zcchc8        | 0.006725502 | 1.553623915 | down |
| Ssh3          | 0.006725502 | 1.629922748 | up   |
| LOC383301     | 0.006725502 | 1.956738472 | up   |
| Hebp2         | 0.006725502 | 1.914132834 | up   |
| Zfp326        | 0.006725502 | 2.138542891 | down |
| Phyhipl       | 0.006725502 | 3.186303616 | down |
| Helz          | 0.00675097  | 2.73856616  | down |
| EG433144      | 0.006774929 | 1.598647475 | down |
| Tcfcp2l1      | 0.006782831 | 1.967756152 | up   |
| 5730455P16Rik | 0.006791696 | 1.612658024 | down |
| Capns2        | 0.006791696 | 1.841194511 | up   |
| 4932441P04Rik | 0.006791696 | 1.615100503 | down |
| Tub           | 0.006791696 | 1.646720886 | up   |
| Wnk4          | 0.006791696 | 2.388968945 | down |
| 5930429A15Rik | 0.00680544  | 1.631694913 | up   |
| Cd74          | 0.00680544  | 1.822950959 | up   |
| Fam19a4       | 0.00680544  | 1.991144896 | up   |
| Araf          | 0.00680544  | 1.668467164 | down |
| Papln         | 0.00680544  | 1.908900261 | up   |
| LOC278188     | 0.00680544  | 1.561708689 | up   |
| Klhl21        | 0.00680544  | 1.577566743 | down |
| C130002K18Rik | 0.00680544  | 1.701230407 | down |
| Sep-03        | 0.006808474 | 1.992466807 | down |
| Neurod2       | 0.006810492 | 3.529103756 | down |
| Cyfip2        | 0.006810492 | 2.251601219 | down |
| Ccdc116       | 0.006810492 | 1.669013143 | up   |
| Slc5a7        | 0.006810492 | 1.691467285 | up   |
| Moxd1         | 0.006810492 | 2.806173563 | up   |
| Rn18s         | 0.006810492 | 5.893964768 | down |
| Rad51c        | 0.006810492 | 1.950005174 | down |
| Abcc9         | 0.006818637 | 1.902769804 | up   |
| Xrn2          | 0.006818637 | 1.667892456 | down |
| Ssbp1         | 0.006818637 | 1.507613778 | up   |
| Phactr1       | 0.006820121 | 1.801604271 | up   |
| CKLF5         | 0.00682967  | 1.83629787  | up   |
| Hoxd4         | 0.006832071 | 4.644217968 | down |
| Fbxo30        | 0.006833334 | 1.701165438 | down |
| Nol3          | 0.00683459  | 1.77370882  | up   |
| Angpt2        | 0.006839463 | 1.679457068 | up   |
| Lmbr1l        | 0.006839463 | 2.864704847 | up   |
| Unc84a        | 0.006839463 | 1.602512956 | up   |
| Cds1          | 0.006839463 | 2.031857491 | up   |
| Maob          | 0.006839463 | 2.398277998 | up   |

|               |             |             |      |
|---------------|-------------|-------------|------|
| Rilpl1        | 0.006844088 | 1.89732337  | up   |
| C430017H16Rik | 0.006844088 | 1.687273145 | up   |
| Thsd4         | 0.006844088 | 2.118721247 | down |
| Theg          | 0.006844088 | 1.89477241  | up   |
| Ttbk1         | 0.006854275 | 1.811812997 | down |
| Gab3          | 0.006854275 | 2.066807032 | up   |
| Epha1         | 0.006854275 | 2.248092413 | up   |
| 4833424P18Rik | 0.006854275 | 1.800855041 | up   |
| BC040758      | 0.006854275 | 1.881813645 | up   |
| Camk2a        | 0.006857767 | 1.672849536 | up   |
| Zfp316        | 0.006887345 | 2.404848576 | up   |
| Cdh16         | 0.006887345 | 1.757674575 | up   |
| C730031B13Rik | 0.006887345 | 1.59008038  | up   |
| Arsj          | 0.006887345 | 2.018283606 | down |
| Trim34        | 0.006891481 | 1.660337687 | up   |
| Bcl2l11       | 0.006891481 | 1.717076063 | up   |
| B130005I07Rik | 0.006894814 | 1.776559472 | up   |
| LOC218476     | 0.006894814 | 1.954159975 | up   |
| LOC242235     | 0.006894814 | 1.599460244 | up   |
| Axud1         | 0.006900339 | 1.728597283 | up   |
| Fst           | 0.006900339 | 1.821462512 | up   |
| Abca8         | 0.006900339 | 1.695486903 | up   |
| Rffl          | 0.006902471 | 1.813576341 | up   |
| Sall3         | 0.006902471 | 2.016688347 | down |
| Pcolce2       | 0.006902471 | 4.951421261 | down |
| Casp4         | 0.006902471 | 1.708208203 | up   |
| Renbp         | 0.006902471 | 1.954621315 | up   |
| Gm428         | 0.006905012 | 1.682952523 | up   |
| Mapk13        | 0.006923934 | 1.829774261 | up   |
| Cdh3          | 0.006925982 | 1.991959691 | up   |
| 4932443E23Rik | 0.006941421 | 1.856648922 | up   |
| Bok           | 0.006944013 | 1.725970626 | up   |
| Hyal3         | 0.006974815 | 1.691222668 | up   |
| LOC331336     | 0.006974815 | 1.923565149 | up   |
| Svil          | 0.006974815 | 1.883203507 | up   |
| EG665806      | 0.006974815 | 1.538271427 | up   |
| Plaa          | 0.006974815 | 1.906274915 | down |
| Olfr437       | 0.006974815 | 1.75923121  | up   |
| Elf2          | 0.006974815 | 1.971977711 | down |
| Fmo5          | 0.006979238 | 1.681067348 | up   |
| Chrnbl        | 0.006979779 | 1.756003737 | up   |
| Atp6v1c2      | 0.006979779 | 1.659458637 | up   |
| D15Bwg0759e   | 0.006980874 | 1.640074372 | up   |
| Fem1c         | 0.006980874 | 2.018807888 | down |
| Styx1l        | 0.006983957 | 1.769035101 | up   |
| Cygb          | 0.006983957 | 2.201939583 | down |
| Ftsj1         | 0.007030493 | 1.663455963 | up   |
| Hes5          | 0.007030493 | 1.800835371 | down |

|               |             |             |      |
|---------------|-------------|-------------|------|
| S100a16       | 0.007030493 | 1.734155178 | up   |
| AA536749      | 0.007030493 | 1.6500386   | up   |
| Stat3         | 0.007030493 | 2.110694408 | down |
| Nhlrc2        | 0.007061729 | 1.710560799 | down |
| Prox1         | 0.007061729 | 1.736420631 | down |
| 2810468N07Rik | 0.007061729 | 1.82218039  | up   |
| Fhl2          | 0.007062017 | 1.584973693 | up   |
| A230060F14Rik | 0.007062017 | 1.656142712 | up   |
| Msrb2         | 0.007066617 | 1.665276408 | up   |
| Shisa3        | 0.00707235  | 2.274885893 | up   |
| 5830430H09Rik | 0.007092048 | 1.623436332 | up   |
| LOC100046895  | 0.007110078 | 1.836684942 | down |
| Zfp667        | 0.007124276 | 1.671773434 | down |
| 9330159N05Rik | 0.007150918 | 1.969331265 | up   |
| Pnpla1        | 0.007153324 | 1.512577653 | up   |
| Spcs3         | 0.007154265 | 1.514374852 | up   |
| Crhbp         | 0.007159021 | 1.597204566 | up   |
| Cxcl4         | 0.007159021 | 13.25275803 | down |
| 4931403M11Rik | 0.007188464 | 1.84330225  | up   |
| Nasp          | 0.007192605 | 2.297074795 | down |
| A430023D23Rik | 0.00719588  | 1.716188669 | down |
| Gdap1         | 0.00719588  | 1.61664021  | up   |
| Cyp4v3        | 0.00719588  | 1.596699596 | up   |
| Actr3         | 0.007201419 | 1.721425533 | up   |
| Dpysl3        | 0.007201419 | 3.517597914 | down |
| Olfr1012      | 0.007201419 | 1.837745905 | up   |
| Yod1          | 0.007206895 | 2.08818841  | down |
| Itch          | 0.00721038  | 1.991962671 | down |
| Rgs9          | 0.007252101 | 1.727088451 | up   |
| Hdac2         | 0.007252101 | 1.909250617 | down |
| Ddx24         | 0.007255989 | 2.493500233 | down |
| Shhrs         | 0.007255989 | 1.819928527 | up   |
| LOC384590     | 0.007255989 | 1.794127703 | up   |
| Cgnl1         | 0.007255989 | 1.691678286 | up   |
| Ctcf1         | 0.007255989 | 1.633858681 | up   |
| Mfap2         | 0.007255989 | 1.751133323 | up   |
| Vav2          | 0.007267179 | 1.586883783 | down |
| Mamdc2        | 0.007276483 | 1.944421411 | up   |
| St6galnac4    | 0.007279167 | 1.586206198 | up   |
| Abca8a        | 0.007279167 | 2.4294765   | up   |
| Nid2          | 0.007279167 | 2.354711771 | up   |
| Arap1         | 0.007279167 | 1.756273747 | up   |
| D330038K10Rik | 0.007279167 | 1.515064955 | up   |
| Sprn          | 0.007279167 | 1.790618658 | up   |
| 9830169C18Rik | 0.007279167 | 2.056295633 | down |
| Cyp2d22       | 0.007279167 | 1.703147292 | up   |
| Cast          | 0.007279167 | 1.640567184 | up   |
| Lpcat2        | 0.007279167 | 1.584900975 | up   |

|               |             |             |      |
|---------------|-------------|-------------|------|
| Sox12         | 0.007292023 | 1.672815085 | up   |
| Bdnf          | 0.007310998 | 1.615655899 | up   |
| Wnt6          | 0.007311164 | 2.307042122 | up   |
| LOC100044177  | 0.00732174  | 1.856105566 | down |
| 2410022M11Rik | 0.00732174  | 1.69636941  | up   |
| Bag3          | 0.00732174  | 1.983270645 | up   |
| 4930473A06Rik | 0.00732174  | 1.749178767 | up   |
| Slc1a2        | 0.00732174  | 1.705502272 | up   |
| Cntn6         | 0.00732174  | 2.016876459 | up   |
| Ccl11         | 0.00732174  | 1.968761802 | up   |
| Fa2h          | 0.00732174  | 1.655112386 | up   |
| Mecr          | 0.00732174  | 1.605198264 | up   |
| Wdfy3         | 0.00732174  | 1.845359206 | down |
| Mvk           | 0.00732174  | 1.720483065 | up   |
| D930016B10Rik | 0.007333499 | 1.795434833 | up   |
| 4930415O10Rik | 0.007334078 | 1.793777227 | up   |
| Serpinf1      | 0.007334078 | 2.480190516 | up   |
| 1500010G04Rik | 0.007348674 | 6.718616486 | down |
| Clstn1        | 0.007359137 | 3.314177036 | down |
| Fkbpl         | 0.007389454 | 1.572482348 | up   |
| Usp53         | 0.007401914 | 1.667365432 | up   |
| Cd40          | 0.007411639 | 1.74896884  | up   |
| Arf2          | 0.007411639 | 1.555084348 | down |
| LOC100046844  | 0.007411639 | 1.75037837  | up   |
| Gca           | 0.007411639 | 1.53303206  | up   |
| Tnrc4         | 0.007411639 | 1.768378377 | up   |
| Vax1          | 0.00741622  | 1.763728619 | up   |
| Rassf10       | 0.007422095 | 1.730568051 | up   |
| Eif4e3        | 0.007440148 | 1.622558117 | up   |
| C230040D17Rik | 0.007440148 | 1.909767866 | down |
| Zfp462        | 0.007440148 | 2.887309313 | down |
| Fam168a       | 0.007443503 | 2.017491341 | down |
| Dlx2          | 0.007443503 | 2.451479197 | up   |
| Sult1a1       | 0.007447255 | 1.99036324  | up   |
| Galr1         | 0.007447255 | 1.568322897 | up   |
| Tgfb1i1       | 0.007453127 | 1.581996679 | up   |
| A130081B01    | 0.00745955  | 1.580934048 | up   |
| Gtf2ird1      | 0.00745955  | 1.828932643 | up   |
| Pld2          | 0.00745955  | 1.680220246 | up   |
| Dncic2        | 0.00745955  | 1.769789934 | down |
| Vgll2         | 0.00745955  | 1.534909844 | up   |
| Cbr3          | 0.007459671 | 2.138172865 | up   |
| Col18a1       | 0.007466195 | 2.501227617 | up   |
| Rhbdf1        | 0.007466195 | 2.64759326  | up   |
| Fbxw4         | 0.007466195 | 1.767644286 | up   |
| Tptf-pending  | 0.007466195 | 1.530443311 | up   |
| Ctsr          | 0.007474311 | 1.632862806 | up   |
| Abhd14b       | 0.007474311 | 2.05855608  | up   |

|                |             |             |      |
|----------------|-------------|-------------|------|
| Fmo2           | 0.007484068 | 1.892902613 | up   |
| Car5b          | 0.007484068 | 1.63581562  | up   |
| Cd34           | 0.007484068 | 1.670154095 | up   |
| Asf1a          | 0.007484068 | 1.856505036 | down |
| 6820406G21Rik  | 0.007484068 | 1.692243815 | up   |
| Nat10          | 0.007509483 | 1.53066957  | up   |
| Pdcl3          | 0.007509483 | 1.602994084 | up   |
| Ky             | 0.007509483 | 1.5535568   | up   |
| LOC381727      | 0.007509483 | 1.716349363 | up   |
| Gkap1          | 0.0075322   | 3.127353668 | down |
| 2900024C23Rik  | 0.0075322   | 1.965977311 | up   |
| Ntsr1          | 0.0075322   | 1.598834753 | up   |
| D930030O05Rik  | 0.0075322   | 1.947984695 | down |
| Idi2           | 0.0075322   | 1.644993901 | up   |
| Snx22          | 0.007533087 | 1.846445441 | up   |
| Mgst1          | 0.007533087 | 1.981680512 | up   |
| 2010300C02Rik  | 0.007533087 | 1.583681583 | up   |
| Pdzrn4         | 0.007533087 | 1.714657188 | up   |
| LOC100047712   | 0.007549857 | 1.938086033 | down |
| 9030607L17Rik  | 0.007550064 | 1.810695887 | up   |
| LOC238726      | 0.007560236 | 1.6189574   | up   |
| 9626100_224_rc | 0.00757332  | 1.62882328  | up   |
| Figl1          | 0.007580963 | 1.58681941  | down |
| Cd44           | 0.007580963 | 1.650398016 | up   |
| Rasgef1c       | 0.007580963 | 1.714436173 | up   |
| Clspn          | 0.007580963 | 2.254021168 | down |
| LOC382157      | 0.007580963 | 3.274966478 | down |
| Nhlh1          | 0.007580963 | 1.535525203 | up   |
| Hist2h2ac      | 0.007580963 | 2.687710762 | down |
| Ddb2           | 0.007580963 | 1.699692726 | up   |
| Tdp1           | 0.007584044 | 1.513340592 | down |
| Irak4          | 0.007590463 | 1.620100856 | up   |
| Slc25a4        | 0.007590463 | 2.276545525 | down |
| Zfp429         | 0.007592386 | 1.922096849 | up   |
| Cpa6           | 0.007592386 | 1.919758916 | up   |
| D430020J02Rik  | 0.007592386 | 1.765411258 | up   |
| Rbm47          | 0.007598253 | 1.687064171 | up   |
| Slc35f4        | 0.007609872 | 2.122945547 | up   |
| Dgka           | 0.007609872 | 2.415873766 | up   |
| Kcna10         | 0.007609872 | 1.668903232 | up   |
| Npr3           | 0.007609872 | 1.855009079 | up   |
| Rab14          | 0.007610234 | 2.481125593 | down |
| Il13ra1        | 0.007610234 | 1.975075603 | up   |
| Cdkl2          | 0.007610234 | 1.730247855 | up   |
| LOC383293      | 0.007610234 | 2.054222584 | up   |
| Cdh3           | 0.007612692 | 1.725340486 | up   |
| Gpc5           | 0.007612692 | 1.679262877 | up   |
| Ugcgl2         | 0.007612692 | 1.9065516   | up   |

|               |             |             |      |
|---------------|-------------|-------------|------|
| Unc5h3        | 0.007612692 | 1.822271228 | down |
| Prkch         | 0.007612692 | 1.788521528 | up   |
| 3110006E14Rik | 0.007629851 | 2.25151825  | down |
| 2410002O22Rik | 0.007629851 | 1.671185613 | down |
| Arhgap21      | 0.007629851 | 2.339950562 | down |
| Anxa9         | 0.007653587 | 1.68926847  | up   |
| Fbn2          | 0.007673904 | 1.576816559 | down |
| Psen2         | 0.007673904 | 1.833816052 | up   |
| Traf1         | 0.007686668 | 1.651134849 | up   |
| 9430073L23Rik | 0.007689212 | 1.595974684 | up   |
| Ddx6          | 0.007691832 | 1.673915267 | down |
| Sh3tc2        | 0.007707933 | 2.7875247   | up   |
| 7330438C15Rik | 0.007717744 | 1.57926023  | up   |
| Jarid1a       | 0.007717744 | 1.509106159 | down |
| LOC100046343  | 0.007721309 | 5.954205513 | down |
| Ctgf          | 0.007721309 | 3.30226922  | down |
| Nnat          | 0.007727933 | 1.97736907  | down |
| Meox1         | 0.007727933 | 2.52753973  | up   |
| Ahnak         | 0.007727933 | 2.406894445 | up   |
| Cdgap         | 0.007727933 | 1.524498344 | up   |
| LOC328031     | 0.007727933 | 1.745523691 | up   |
| Ube2e3        | 0.007743188 | 1.698887825 | down |
| LOC382372     | 0.007752416 | 1.577971458 | up   |
| Tmc6          | 0.007752416 | 2.286953688 | up   |
| Cttnbp2       | 0.007752416 | 1.67754519  | down |
| Sord          | 0.007752955 | 1.748370409 | up   |
| Fas           | 0.007752955 | 1.665715337 | up   |
| LOC385923     | 0.007752955 | 12.18055344 | down |
| G3bp2         | 0.007752955 | 2.240312576 | down |
| Trim40        | 0.007752955 | 1.882770658 | up   |
| AI480653      | 0.007752955 | 1.83018291  | up   |
| BC057079      | 0.007752955 | 1.598837972 | up   |
| LOC665506     | 0.007752955 | 1.612027764 | up   |
| 3110001A05Rik | 0.007767999 | 2.145489216 | up   |
| 9030003C19Rik | 0.007807687 | 1.511081219 | up   |
| Hoxb2         | 0.007816674 | 1.67150557  | down |
| Alk           | 0.007825272 | 1.786246419 | up   |
| 2310015A05Rik | 0.007825272 | 1.740077615 | up   |
| Dlgap1        | 0.007825272 | 1.693743587 | up   |
| Glb1l2        | 0.007825272 | 1.642053604 | up   |
| Nthl1         | 0.007825272 | 1.699536085 | up   |
| C1qtnf1       | 0.007825272 | 1.724541187 | up   |
| Dnase1l2      | 0.007831065 | 1.528948069 | up   |
| AB182283      | 0.007854151 | 1.70322156  | down |
| Llph          | 0.007864648 | 1.773000598 | down |
| Tnfrsf12a     | 0.007868233 | 1.775237918 | up   |
| Tsc22d2       | 0.007868233 | 1.512153626 | down |
| 2010203O07Rik | 0.007868233 | 1.745176435 | down |

|               |             |             |      |
|---------------|-------------|-------------|------|
| Jarid2        | 0.007895046 | 2.334523439 | down |
| B2m           | 0.007902038 | 1.536436677 | up   |
| Tnk1          | 0.007904307 | 1.766756654 | up   |
| 4831403C07Rik | 0.007904307 | 1.660034657 | up   |
| Bbc3          | 0.007904307 | 1.583478689 | up   |
| Ttyh2         | 0.007904307 | 1.741921544 | up   |
| Arpc3         | 0.007929187 | 1.610699415 | up   |
| D230050J18Rik | 0.007929187 | 1.686151862 | down |
| Ptpre         | 0.007929187 | 1.711907625 | up   |
| Ugt8a         | 0.007929187 | 2.305081129 | up   |
| Sh3tc1        | 0.007929187 | 1.720714808 | up   |
| Bcl2l12       | 0.007929187 | 2.196415424 | up   |
| C630013B14Rik | 0.007929187 | 1.732495785 | up   |
| C130069I09Rik | 0.007929187 | 1.549565673 | up   |
| Epb4.1        | 0.007929187 | 2.568125486 | down |
| Mdga2         | 0.007929187 | 1.944506049 | down |
| Emid2         | 0.007929187 | 1.697889805 | up   |
| 4930523M17Rik | 0.007929187 | 1.730317593 | up   |
| 3321401G04Rik | 0.007929187 | 1.671618223 | up   |
| Gabrb3        | 0.007929187 | 2.091973782 | up   |
| 2610302F08Rik | 0.007929187 | 1.775606036 | up   |
| Relb          | 0.007958808 | 1.69336462  | up   |
| Cog4          | 0.007973351 | 1.84077239  | up   |
| LOC211591     | 0.007982783 | 1.802177072 | up   |
| H2-T23        | 0.007982783 | 1.835627437 | up   |
| 4933407C03Rik | 0.008013042 | 1.636318803 | down |
| Jam2          | 0.008013042 | 1.81919992  | down |
| BC030046      | 0.008013042 | 1.688476563 | up   |
| Slc17a7       | 0.008013042 | 1.624390841 | up   |
| Elavl4        | 0.008016469 | 5.826591492 | down |
| E130318A13Rik | 0.008045985 | 1.812476873 | down |
| LOC100042427  | 0.008045985 | 1.882529974 | down |
| Mst1r         | 0.008053708 | 1.614369988 | up   |
| Ktn1          | 0.008053708 | 1.746398807 | up   |
| D530005L17Rik | 0.008056264 | 1.705158114 | up   |
| Matn1         | 0.008056264 | 17.49271202 | down |
| Pdk4          | 0.008056264 | 1.632621765 | up   |
| 2010001M09Rik | 0.008066949 | 1.624148011 | up   |
| Bace2         | 0.008066949 | 1.819162846 | up   |
| Spon2         | 0.008066949 | 2.846888065 | up   |
| Nudt7         | 0.008073842 | 1.697523594 | up   |
| Nit2          | 0.008073842 | 2.124674082 | up   |
| C2            | 0.00808227  | 2.060898304 | up   |
| Camk2d        | 0.00808227  | 1.501883268 | up   |
| LOC100044736  | 0.008108694 | 2.259430885 | up   |
| Mag           | 0.008116387 | 1.843911767 | up   |
| 1700009P03Rik | 0.008131432 | 2.747610807 | down |
| Pramel3       | 0.008131432 | 1.899806261 | up   |

|               |             |             |      |
|---------------|-------------|-------------|------|
| Ash1l         | 0.008131432 | 1.631873131 | down |
| D230046H12Rik | 0.008131432 | 2.742769957 | up   |
| Myog          | 0.008146079 | 1.942202568 | up   |
| Dscr6         | 0.008158859 | 1.506543756 | up   |
| Il13          | 0.008158859 | 1.610215068 | up   |
| 1200008N06Rik | 0.008158859 | 1.67321372  | up   |
| Eef2k         | 0.008158859 | 1.51352334  | up   |
| A830033B12Rik | 0.008172254 | 1.663051128 | up   |
| Gucy1a3       | 0.008180053 | 1.522813916 | up   |
| Map3k5        | 0.008184159 | 1.780693173 | up   |
| Pear1         | 0.008188862 | 1.705453515 | up   |
| Itgae         | 0.008193313 | 1.626609445 | up   |
| Tnfsf13b      | 0.008194066 | 1.609321356 | up   |
| Ildr1         | 0.008194066 | 1.788333178 | up   |
| Kcnc2         | 0.008194066 | 1.71026814  | up   |
| 1810031K17Rik | 0.008194066 | 1.666445136 | up   |
| 0610007P22Rik | 0.008194066 | 1.894989491 | up   |
| Zap70         | 0.008194066 | 1.654173493 | up   |
| Gm1661        | 0.008194066 | 1.723530293 | up   |
| Il15          | 0.008194066 | 1.629272938 | up   |
| Slc44a1       | 0.008194066 | 1.802622199 | up   |
| Al427809      | 0.008194066 | 1.684773922 | up   |
| Crx           | 0.00820628  | 1.709802032 | up   |
| Laptm4b       | 0.008207075 | 1.735547662 | up   |
| Rbmy1a1       | 0.008207075 | 1.672153235 | up   |
| A130001G05Rik | 0.008207075 | 2.089229584 | down |
| A930033C23Rik | 0.008207075 | 1.590865731 | up   |
| Tgfb3         | 0.008219182 | 1.704247832 | up   |
| Gfap          | 0.008232384 | 1.728727818 | up   |
| Ephx1         | 0.008232384 | 1.981066227 | up   |
| Pou3f4        | 0.008255162 | 2.166515112 | down |
| 1810062O18Rik | 0.008255162 | 1.619299412 | up   |
| D330004O07Rik | 0.008266584 | 2.180675268 | up   |
| 1700007P14Rik | 0.008266584 | 1.613148332 | up   |
| Klk6          | 0.008266584 | 1.93628788  | up   |
| Scn1a         | 0.008266584 | 1.547603011 | down |
| Decr1         | 0.008266584 | 2.292868376 | up   |
| Cxcl12        | 0.008266584 | 2.093463182 | up   |
| E130113E03Rik | 0.008266584 | 1.747346163 | up   |
| Nid1          | 0.008266584 | 2.851094723 | up   |
| As3mt         | 0.008266584 | 1.656816363 | up   |
| Lgals1        | 0.008266584 | 1.780216098 | up   |
| LOC100046207  | 0.008266584 | 1.537519813 | down |
| Al317223      | 0.008266584 | 2.557655573 | up   |
| Ldb2          | 0.008266584 | 2.027406693 | up   |
| 3732409C05Rik | 0.008266584 | 1.727020264 | down |
| Acyp2         | 0.008266584 | 1.970337987 | up   |
| Tmtc2         | 0.008266584 | 1.857040048 | up   |



|                    |             |             |      |
|--------------------|-------------|-------------|------|
| LOC100046035       | 0.008266584 | 1.927466393 | up   |
| Rnu6               | 0.008266584 | 2.246017695 | down |
| Dgat2l4            | 0.008266584 | 1.606304765 | up   |
| 8430408G22Rik      | 0.008266584 | 1.553248644 | up   |
| Mrpl45             | 0.00826992  | 1.62528801  | up   |
| A130086G11Rik      | 0.008276437 | 1.595142365 | up   |
| Ubl4               | 0.008276437 | 1.597399592 | up   |
| scl0002066.1_0     | 0.00828695  | 1.799826026 | up   |
| Gclc               | 0.008306993 | 1.722256184 | down |
| Cnp1               | 0.008306993 | 1.889697194 | up   |
| Fer1l3             | 0.008322276 | 1.75781095  | up   |
| Tbc1d2             | 0.008324308 | 1.615794063 | up   |
| LOC100041722       | 0.008368284 | 1.764884234 | up   |
| Igf2bp1            | 0.008368284 | 3.780094385 | down |
| Nfib               | 0.008386457 | 3.720114231 | down |
| Mgmt               | 0.008426491 | 1.876641154 | up   |
| Hist1h2an          | 0.008426491 | 6.114239693 | down |
| Entpd2             | 0.008429697 | 2.361177445 | up   |
| Krt32              | 0.008429697 | 1.717882037 | up   |
| Acot3              | 0.008430935 | 1.656251311 | up   |
| D630026G14Rik      | 0.008430935 | 1.820043206 | up   |
| 9530026P05Rik      | 0.008430935 | 1.871360064 | up   |
| Fxyd5              | 0.008430935 | 1.842514753 | up   |
| Ube2v1             | 0.008430935 | 1.691733241 | down |
| LOC100041516       | 0.00843975  | 3.315711498 | down |
| Tspan7             | 0.00843975  | 2.516344547 | up   |
| Vmo1               | 0.008441206 | 1.792012215 | up   |
| Htra1              | 0.008443809 | 2.110677004 | up   |
| Arvcf              | 0.008453381 | 1.665472508 | up   |
| Plod2              | 0.008453381 | 1.915130138 | down |
| Sds                | 0.008464897 | 1.653308392 | up   |
| Dusp22             | 0.008476226 | 1.864755988 | up   |
| Gm239              | 0.008494746 | 2.181171656 | up   |
| Fancc              | 0.008497479 | 1.768537283 | up   |
| 4833412L08Rik      | 0.008497479 | 1.737890244 | up   |
| Gm603              | 0.00850749  | 1.703496695 | up   |
| C130067A03Rik      | 0.008513128 | 2.097831726 | down |
| Man2a1             | 0.008513128 | 1.847724199 | up   |
| Dnajc1             | 0.008513128 | 1.504798055 | down |
| D230017C05Rik      | 0.008513128 | 1.978462935 | down |
| Stard5             | 0.008545738 | 1.781101823 | up   |
| Unc13c             | 0.008549956 | 1.767547011 | up   |
| Stxbp5l            | 0.00855079  | 2.166321278 | up   |
| Trim66             | 0.00855079  | 1.791775823 | up   |
| Zfp759             | 0.008573219 | 1.723873377 | up   |
| Cbx6               | 0.008578933 | 1.60664022  | up   |
| ENSMUSG00000043795 | 0.008585238 | 2.958674192 | up   |
| Aard               | 0.008600202 | 1.796426177 | up   |

|                 |             |             |      |
|-----------------|-------------|-------------|------|
| Arhgef10l       | 0.008600202 | 1.61591661  | up   |
| Gyg             | 0.008610106 | 1.733781338 | up   |
| Ano4            | 0.008614907 | 1.943389058 | up   |
| Twistnb         | 0.008614907 | 3.384165525 | down |
| Sdk1            | 0.008632889 | 2.000249386 | up   |
| Nudt7           | 0.008632889 | 1.527867675 | up   |
| Abca9           | 0.008632889 | 1.87240243  | up   |
| Nudt21          | 0.008632889 | 1.905255437 | down |
| Klk8            | 0.008632889 | 1.878411293 | up   |
| Mapbpip-pending | 0.008632889 | 2.114540339 | up   |
| Tcfap2c         | 0.008632889 | 2.427585125 | up   |
| Twist2          | 0.008634337 | 1.793907762 | up   |
| Scg5            | 0.008642821 | 1.857169628 | down |
| 4930482J15Rik   | 0.008642821 | 1.642644048 | up   |
| F2rl1           | 0.008643521 | 1.919010401 | up   |
| Prkar2a         | 0.008643521 | 2.038744688 | down |
| C030032C09Rik   | 0.008644829 | 1.583710194 | up   |
| Opn1mw          | 0.008644829 | 1.705514789 | up   |
| D930049D19Rik   | 0.008662812 | 1.834710956 | up   |
| Timp3           | 0.00867389  | 1.833983421 | up   |
| Nit1            | 0.008690017 | 1.75846231  | down |
| 3632431M01Rik   | 0.008690017 | 2.012543917 | down |
| Dmrt2           | 0.008690017 | 1.751652598 | up   |
| A530017D24Rik   | 0.008690017 | 1.706673503 | up   |
| Fam115c         | 0.008690017 | 1.934285164 | up   |
| Cbfb            | 0.008690017 | 1.530669212 | up   |
| Rasgrf1         | 0.008690017 | 1.944167733 | up   |
| Anxa6           | 0.008690017 | 1.643191695 | up   |
| Cma1            | 0.008690017 | 1.626428604 | up   |
| Ppcs            | 0.008690017 | 1.688676357 | up   |
| Vcam1           | 0.008691782 | 1.600209951 | up   |
| Wisp1           | 0.008691782 | 1.771409392 | up   |
| Pja2            | 0.008692887 | 1.638751626 | down |
| 6430524C05Rik   | 0.008696577 | 1.834477663 | up   |
| Prpf40b         | 0.008696577 | 1.96666193  | down |
| Rsad1           | 0.008702136 | 1.844706655 | up   |
| 4921537F17Rik   | 0.008705314 | 1.577659965 | up   |
| Trpm3           | 0.008705314 | 1.723128915 | up   |
| LOC280097       | 0.008705691 | 5.131315708 | down |
| Vstm2a          | 0.008705691 | 1.9843961   | up   |
| F430201B04Rik   | 0.008705691 | 1.592969537 | up   |
| EG434168        | 0.008705691 | 2.421325207 | down |
| Cxcl16          | 0.008706657 | 1.801973343 | up   |
| Sobp            | 0.008708064 | 2.54166007  | down |
| Bnpl            | 0.008752538 | 1.981240034 | up   |
| Wnt5b           | 0.008765893 | 2.029637575 | up   |
| Ddx56           | 0.008765893 | 1.738734722 | up   |
| LOC100047645    | 0.008765893 | 1.882153153 | down |

|               |             |             |      |
|---------------|-------------|-------------|------|
| Parp4         | 0.008766856 | 1.571952105 | up   |
| Chrna1        | 0.008777285 | 1.515834332 | up   |
| Cbr1          | 0.008797905 | 1.87748456  | down |
| F8            | 0.008797905 | 1.519818425 | up   |
| Lgals8        | 0.008797905 | 1.729083657 | up   |
| Olfr1436      | 0.008816095 | 1.747491241 | up   |
| C330034C07Rik | 0.008816095 | 2.522972822 | down |
| A830021G05Rik | 0.008816416 | 1.785650253 | down |
| Nck1          | 0.008816416 | 1.675292373 | up   |
| Aplnr         | 0.008816416 | 1.82122314  | up   |
| Nrg1          | 0.008816416 | 1.679394722 | up   |
| Edil3         | 0.008819844 | 1.579653502 | up   |
| Spsb2         | 0.008819844 | 1.781366587 | up   |
| Alx4          | 0.008819974 | 1.694449902 | up   |
| Arl9          | 0.008819974 | 1.554883003 | up   |
| Ahnak         | 0.008828232 | 2.140681744 | up   |
| Megf6         | 0.008828232 | 1.756297708 | up   |
| Chmp2b        | 0.008828232 | 1.695015669 | up   |
| Tpcn2         | 0.008828232 | 2.939031839 | up   |
| 2700089E24Rik | 0.008830302 | 2.184946537 | down |
| Pcdh10        | 0.008830302 | 1.861829281 | up   |
| Cyp11b2       | 0.008853156 | 1.628949761 | up   |
| Gbbp1l1       | 0.008853156 | 1.726452112 | up   |
| Garnl3        | 0.008853156 | 1.759131193 | up   |
| LOC383085     | 0.008853156 | 1.618908882 | up   |
| AI593442      | 0.008853156 | 1.956992865 | up   |
| Adamts16      | 0.008856634 | 1.713822365 | up   |
| Lig1          | 0.008868489 | 1.777177453 | down |
| Tfpt          | 0.008868489 | 1.611630082 | down |
| Hic1          | 0.008868489 | 2.263477325 | up   |
| Zfp316        | 0.008897967 | 2.60804224  | up   |
| Lama3         | 0.008897967 | 1.753758192 | up   |
| Tnfrsf25      | 0.008897967 | 1.869071364 | up   |
| Cacna2d1      | 0.008897967 | 2.822113752 | down |
| Ube2g2        | 0.008907036 | 1.697912097 | up   |
| LOC234187     | 0.008931518 | 1.862615347 | up   |
| Doc2b         | 0.008934243 | 1.792932868 | up   |
| Htatif2       | 0.008934243 | 1.737832785 | up   |
| Usp42         | 0.008934243 | 1.578997731 | down |
| Epb4.1l4a     | 0.008934243 | 2.136504173 | up   |
| Cd82          | 0.008934243 | 1.639499545 | up   |
| Rgp1          | 0.008972336 | 1.638210297 | up   |
| Col7a1        | 0.008972336 | 1.732517362 | up   |
| Tesc          | 0.008972336 | 1.570125699 | up   |
| LOC666979     | 0.008983539 | 1.747996569 | up   |
| BC037594      | 0.008983539 | 1.669944406 | up   |
| Neurod2       | 0.008990856 | 2.692448854 | down |
| Npr3          | 0.008990856 | 1.937196493 | up   |

|                |             |             |      |
|----------------|-------------|-------------|------|
| Chrd           | 0.008990856 | 1.864286184 | up   |
| Hars           | 0.008999921 | 1.892925143 | up   |
| LOC241293      | 0.008999921 | 1.739557147 | up   |
| Trim29         | 0.009006418 | 2.351221323 | up   |
| Lxn            | 0.009009441 | 1.571093559 | down |
| Brsk2          | 0.009010558 | 1.788912416 | down |
| Acaa2          | 0.009010558 | 2.446219921 | up   |
| D630016P04Rik  | 0.009023962 | 2.351085186 | down |
| Csgalnact2     | 0.009024526 | 1.872832775 | up   |
| Cobl           | 0.009025703 | 1.632187724 | up   |
| Cd44           | 0.009026258 | 2.136491537 | up   |
| 2610008E11Rik  | 0.009029027 | 1.920101523 | down |
| Sepp1          | 0.009041655 | 2.628118753 | up   |
| Sf3b5          | 0.009043137 | 1.583710909 | down |
| Lox            | 0.009045014 | 2.739596367 | up   |
| B430320O11Rik  | 0.009049997 | 1.826068878 | up   |
| Rgnf           | 0.009049997 | 1.53875792  | up   |
| Pwwp2b         | 0.00905255  | 1.522789717 | up   |
| A930011E24Rik  | 0.009054946 | 1.627388954 | up   |
| Stk3           | 0.009054946 | 2.009322882 | up   |
| 5830434K11Rik  | 0.009054946 | 1.941124439 | up   |
| Prph           | 0.009054946 | 1.726447105 | up   |
| Rps6ka3        | 0.009057363 | 1.576730967 | up   |
| Gpmb           | 0.009057363 | 1.590310454 | up   |
| Pax1           | 0.009057363 | 1.705499768 | up   |
| A230065C20Rik  | 0.009059799 | 1.517260313 | up   |
| Btla           | 0.009061727 | 1.748383045 | up   |
| Pja2           | 0.009061727 | 1.559509635 | down |
| Trappc3        | 0.009061727 | 2.250225306 | up   |
| 6530404N21Rik  | 0.009061727 | 2.422698259 | down |
| Dennd5b        | 0.009076538 | 1.552022696 | up   |
| Cbx5           | 0.009076851 | 2.214555979 | down |
| LOC386146      | 0.009076851 | 1.50862205  | down |
| LOC234281      | 0.009125171 | 1.605422258 | up   |
| Col5a1         | 0.009160657 | 1.594780684 | up   |
| 6720453O12Rik  | 0.009167681 | 2.122038841 | down |
| Vmn2r42        | 0.009167681 | 1.694909096 | up   |
| Slc22a7        | 0.009179139 | 1.850149989 | up   |
| AI317223       | 0.009181267 | 2.754652977 | up   |
| 3930401K13Rik  | 0.009211071 | 1.629343033 | up   |
| Ap1m2          | 0.009213029 | 1.756723166 | up   |
| LOC382853      | 0.009222842 | 1.703528643 | up   |
| 4632427C23Rik  | 0.009232591 | 1.84664011  | up   |
| A730086L23Rik  | 0.009252652 | 1.637778044 | down |
| scl0003749.1_1 | 0.009258654 | 1.771020532 | up   |
| lqsec2         | 0.009260654 | 1.749108076 | up   |
| Pla2g4e        | 0.009274702 | 1.731672645 | up   |
| Dbc1           | 0.009296128 | 1.927104592 | up   |

|                  |             |             |      |
|------------------|-------------|-------------|------|
| Mesdc2           | 0.009309726 | 1.638982177 | up   |
| Kcnh1            | 0.009317075 | 1.685253739 | up   |
| Tectb            | 0.009317075 | 1.826779246 | up   |
| 2900056M20Rik    | 0.009323944 | 1.768056512 | down |
| Marveld1         | 0.009323944 | 1.905035377 | down |
| Rpap2            | 0.009350875 | 1.824938774 | up   |
| Krt82            | 0.009350875 | 1.685524821 | up   |
| Ky               | 0.009350875 | 1.556844831 | up   |
| Plac1            | 0.009350875 | 2.048282147 | up   |
| Efcab1           | 0.009350875 | 1.954356194 | down |
| Glce             | 0.00935186  | 1.682875991 | up   |
| Ankrd11          | 0.00935186  | 1.77718401  | down |
| L3mbtl3          | 0.009355946 | 1.790064216 | up   |
| Ccdc46           | 0.009356299 | 1.526793838 | up   |
| Asap3            | 0.009356299 | 1.729180336 | up   |
| Fas              | 0.009356302 | 1.652994633 | up   |
| Fmn2             | 0.009378376 | 1.58002758  | down |
| 5730521P14Rik    | 0.009378376 | 1.823807716 | down |
| Prpf4b           | 0.009378376 | 1.873102784 | up   |
| A930010I20Rik    | 0.009378376 | 1.576213956 | up   |
| 1700021K14Rik    | 0.009378376 | 1.734856129 | up   |
| Lgi1             | 0.009378376 | 1.720410585 | up   |
| Egfl7            | 0.009378376 | 2.257963657 | up   |
| Dct              | 0.009381647 | 5.408703327 | up   |
| Aim1             | 0.009382416 | 2.137357235 | up   |
| AW551984         | 0.009382416 | 2.160153389 | up   |
| 9430047F21Rik    | 0.009399107 | 2.200658083 | down |
| Tek              | 0.009403303 | 2.240086794 | up   |
| Rftn1            | 0.009403303 | 1.694047093 | up   |
| 2310014B11Rik    | 0.009403303 | 1.707872987 | up   |
| Ssbp3            | 0.009403303 | 1.716467619 | down |
| A230069A22Rik    | 0.009403303 | 2.012366772 | up   |
| Dcamkl1          | 0.009403303 | 2.415606022 | down |
| 2410187C16Rik    | 0.009403303 | 1.793356061 | up   |
| Thoc3            | 0.009423662 | 1.74524796  | up   |
| Csnk1e           | 0.009423662 | 1.974310756 | down |
| Stambpl1         | 0.009439745 | 1.552924633 | up   |
| 2610017I09Rik    | 0.009442161 | 2.153576136 | down |
| Mthfsd           | 0.009465211 | 1.579182625 | up   |
| Igf2bp1          | 0.009466274 | 4.299771309 | down |
| Car13            | 0.0094798   | 1.923994303 | up   |
| Polm             | 0.0094798   | 1.749252677 | up   |
| Ednrb            | 0.009485351 | 2.049070835 | up   |
| Gstt1            | 0.009485351 | 1.692538023 | up   |
| MJ-7000-176_2342 | 0.009506363 | 1.790103555 | up   |
| Lamc1            | 0.009507799 | 1.813621044 | up   |
| Cks2             | 0.009509658 | 1.66986084  | up   |
| Bclaf1           | 0.009511272 | 1.715369105 | down |

|               |             |             |      |
|---------------|-------------|-------------|------|
| M6a-pending   | 0.009511272 | 1.719253659 | up   |
| Chd2          | 0.009511272 | 1.681903601 | down |
| Spna1         | 0.009511272 | 1.511319161 | up   |
| Sgtb          | 0.009511272 | 2.044890881 | down |
| Olfr51        | 0.009511272 | 1.790260196 | up   |
| Polr2h        | 0.009511272 | 1.651274562 | down |
| Traf4         | 0.009511272 | 1.509787679 | down |
| Zcchc16       | 0.009511272 | 1.827062964 | up   |
| Slc32a1       | 0.009511272 | 1.809121847 | down |
| Tas2r143      | 0.009511272 | 1.756335616 | up   |
| H2-T18        | 0.009511272 | 1.576084495 | up   |
| LOC639396     | 0.009511272 | 2.553806782 | down |
| Rnf113a1      | 0.009511272 | 1.73279798  | down |
| A630040K04Rik | 0.009511272 | 1.715204954 | up   |
| A230021I18Rik | 0.009533898 | 1.677199125 | up   |
| Wnt3a         | 0.009533898 | 1.846368909 | up   |
| Rnf168        | 0.009533898 | 1.717544675 | down |
| Hrasls        | 0.009533898 | 1.888400435 | up   |
| Rnf32         | 0.009533898 | 1.609242559 | up   |
| 2310047K21Rik | 0.009543013 | 1.793278933 | up   |
| Med18         | 0.009543013 | 1.547109008 | down |
| Tmco5         | 0.009543013 | 1.612348199 | up   |
| Grik1         | 0.00955644  | 1.662040234 | up   |
| Nfib          | 0.009564897 | 2.907538176 | down |
| Grasp         | 0.009569681 | 1.795322418 | up   |
| 6430511F03    | 0.009575986 | 1.850068808 | down |
| 1500041B16Rik | 0.009575986 | 1.641217709 | up   |
| D530030K12Rik | 0.009575986 | 1.790443778 | up   |
| LOC329305     | 0.009575986 | 1.742141366 | up   |
| Smtnl1        | 0.009575986 | 1.797136784 | up   |
| Ang1          | 0.009575986 | 1.589321375 | up   |
| 9630031F12Rik | 0.009575986 | 1.63048625  | up   |
| Sh3pxd2b      | 0.009575986 | 1.673878074 | up   |
| 4930451E10Rik | 0.009575986 | 1.890608788 | up   |
| Arhgef15      | 0.009575986 | 1.632623673 | up   |
| Mtap7d2       | 0.009584787 | 1.686928392 | up   |
| Stag1         | 0.009584787 | 1.589204788 | down |
| Olfr1158      | 0.009585924 | 1.75974834  | up   |
| Plekha4       | 0.009585924 | 2.825376749 | up   |
| Osbpl3        | 0.009585924 | 1.779070735 | up   |
| Ap3b2         | 0.009585924 | 1.839215517 | down |
| Itsn2         | 0.009589402 | 1.550005555 | up   |
| Amdhd1        | 0.009592187 | 1.691668153 | up   |
| Bean          | 0.009618859 | 1.650404096 | up   |
| Ptch2         | 0.009618859 | 1.617135406 | up   |
| 2610042F04Rik | 0.009618859 | 1.627019048 | up   |
| 4933439F18Rik | 0.009618859 | 1.707402825 | up   |
| 4632428D17Rik | 0.009618859 | 1.684673429 | up   |

|               |             |             |      |
|---------------|-------------|-------------|------|
| Clasp1        | 0.009618859 | 1.849764943 | down |
| Rac1          | 0.009618859 | 2.171116591 | up   |
| Kank4         | 0.009618859 | 1.810952306 | up   |
| C030014I23Rik | 0.0096207   | 1.833017111 | up   |
| Dnahc2        | 0.00965141  | 1.718784094 | up   |
| Ibtk          | 0.009675338 | 1.689213276 | down |
| Zeb2          | 0.009684069 | 1.910193563 | down |
| Gls           | 0.009684069 | 1.872848392 | up   |
| Adamts2       | 0.00969049  | 2.20483923  | up   |
| Bcl2l1        | 0.00969049  | 1.635137916 | up   |
| LOC386486     | 0.00969049  | 2.146090508 | up   |
| Setd1b        | 0.00969049  | 1.837556601 | down |
| Snx22         | 0.009693194 | 1.624597073 | up   |
| C1galt1       | 0.009693194 | 1.780945063 | up   |
| Stat5a        | 0.009693194 | 1.863171816 | up   |
| Mfrp          | 0.009693194 | 1.697880507 | up   |
| Arid4a        | 0.009699852 | 3.754585743 | down |
| 4933402K11Rik | 0.009699852 | 1.772885919 | up   |
| Syn1          | 0.009699852 | 1.60662806  | up   |
| 9530081N05Rik | 0.009705481 | 2.117772341 | up   |
| Chrn2         | 0.009718569 | 1.82761991  | down |
| Ncor1         | 0.009718569 | 1.59107554  | up   |
| Zfp709        | 0.009718569 | 1.565183044 | up   |
| Ppap2a        | 0.009724128 | 1.914561749 | up   |
| 2610312E17Rik | 0.009726942 | 1.835261941 | up   |
| Syng2         | 0.009726942 | 1.786611199 | up   |
| Tnxb          | 0.009726942 | 1.727104425 | up   |
| Col2a1        | 0.009729158 | 2.52992034  | down |
| Gm1965        | 0.009748752 | 1.606631279 | up   |
| A330042I05Rik | 0.009748752 | 1.825091958 | up   |
| Tcf12         | 0.009768348 | 4.621706009 | down |
| F730047E07Rik | 0.009768348 | 1.615518808 | up   |
| Stra13        | 0.009768348 | 1.548165321 | up   |
| 2810409C01Rik | 0.009768348 | 1.822673321 | up   |
| Prodh         | 0.009776405 | 1.683742285 | up   |
| Hip1          | 0.009776405 | 1.915647626 | down |
| B430109P06Rik | 0.009791596 | 1.735945463 | down |
| Efcab4a       | 0.009791596 | 1.717207909 | up   |
| A730048K03Rik | 0.009791596 | 1.536135435 | up   |
| Tmem74        | 0.009791596 | 1.620414615 | up   |
| Actl6b        | 0.009791596 | 1.56866312  | up   |
| E2f2          | 0.009791596 | 1.546877265 | down |
| Ptpm          | 0.009791596 | 1.611815929 | up   |
| Trak1         | 0.009791596 | 1.625074744 | down |
| C1qtnf2       | 0.009791596 | 1.971712709 | up   |
| Abca9         | 0.009791596 | 1.729775071 | up   |
| 0710001D07Rik | 0.009804831 | 1.632119894 | down |
| 5430405G24Rik | 0.009808603 | 1.777567267 | down |

|               |             |             |      |
|---------------|-------------|-------------|------|
| Il17ra        | 0.009829191 | 1.719638467 | up   |
| Gamt          | 0.009842878 | 1.931936264 | up   |
| LOC245350     | 0.009845682 | 1.576711178 | up   |
| 9630028B13Rik | 0.009845682 | 1.894447446 | up   |
| 4930532M18Rik | 0.009847682 | 2.035574436 | up   |
| D830027H13Rik | 0.009847682 | 3.069585562 | down |
| H2-T23        | 0.00989536  | 2.005981445 | up   |
| 0610007P22Rik | 0.009906671 | 1.580251098 | up   |
| 9130014G24Rik | 0.009911442 | 1.707457423 | up   |
| Acad8         | 0.009915068 | 1.820392132 | up   |
| E330013M12Rik | 0.009915068 | 1.608363867 | down |
| Pbrm1         | 0.009915068 | 10.04542637 | down |
| Dhx58         | 0.009915068 | 1.88868928  | up   |
| 4930507C10Rik | 0.009941685 | 1.529292464 | up   |
| 4931408A02Rik | 0.009955286 | 1.687048078 | up   |
| Phf14         | 0.00996006  | 7.448523998 | down |
| 6030458C11Rik | 0.009961322 | 2.476020098 | down |
| Ssfa2         | 0.009961322 | 2.143637896 | up   |
| Plscr4        | 0.009961322 | 1.84641397  | up   |
| Rassf1        | 0.009961322 | 1.630946398 | up   |
| Map3k11       | 0.009961322 | 1.851284146 | up   |
| Elf3          | 0.009961322 | 1.655043244 | up   |
| Abcg5         | 0.009961322 | 1.60523212  | up   |
| Cacnb1        | 0.009961322 | 1.712791205 | up   |
| Dusp16        | 0.009961322 | 1.527858377 | up   |
| Bicc1         | 0.009961322 | 1.860623479 | up   |
| Rab13         | 0.009961322 | 1.957671285 | up   |
| Vit           | 0.009961322 | 2.304959536 | down |
| Sema3c        | 0.009967953 | 2.030423641 | down |
| Ntrk3         | 0.009967953 | 2.776690722 | down |
| Alg8          | 0.009967953 | 1.792995334 | up   |
| Snx21         | 0.009967953 | 1.751144052 | up   |
| 4921507O14Rik | 0.009967953 | 1.731690049 | up   |
| Col17a1       | 0.009967953 | 1.843631864 | up   |
| Hoxb9         | 0.009967953 | 6.184360504 | down |
| A730008L03Rik | 0.009967953 | 2.121744871 | up   |
| 9930033H14Rik | 0.009967953 | 1.52192843  | down |
| LOC638024     | 0.009967953 | 1.598380804 | up   |
| Qpct          | 0.009967953 | 2.19092536  | up   |
| Htr2a         | 0.009967953 | 1.957232952 | up   |
| Ttc5          | 0.009967953 | 1.716967344 | up   |
| Oxa1l         | 0.009967953 | 2.237709045 | up   |
| LOC385644     | 0.009967953 | 1.925369024 | up   |
| Tssc1         | 0.009968081 | 1.781689525 | up   |
| Egfl8         | 0.009977075 | 2.60512495  | up   |
| McpH1         | 0.009977075 | 1.624047279 | up   |
| Peg10         | 0.009983914 | 1.66422832  | down |
| Trps1         | 0.009986705 | 3.692302942 | down |



|               |             |             |      |
|---------------|-------------|-------------|------|
| Tnfrsf10b     | 0.010004637 | 1.596958637 | up   |
| Grn           | 0.010004637 | 1.63796401  | up   |
| Man1a2        | 0.010019645 | 1.686466217 | up   |
| Plcx3         | 0.010021418 | 1.775030851 | down |
| Oplah         | 0.010022948 | 1.667140842 | up   |
| Psmc5         | 0.010022948 | 1.638295174 | down |
| AW551984      | 0.010022948 | 1.863375545 | up   |
| Irf3          | 0.010022948 | 1.528971195 | up   |
| Eef1a1        | 0.010022948 | 2.054626703 | up   |
| Kcna6         | 0.010035668 | 2.52366209  | up   |
| D9Ert280e     | 0.010044813 | 1.673281074 | up   |
| Rc3h2         | 0.010047354 | 2.368113995 | down |
| 9930031P18Rik | 0.010047354 | 2.466335297 | down |
| D330037H01Rik | 0.010047354 | 1.654175878 | up   |
| 0610008C08Rik | 0.010047354 | 1.601561904 | up   |
| Slc44a1       | 0.010047354 | 2.06903863  | up   |
| Fv1           | 0.010047354 | 1.683701873 | up   |
| A230054D04Rik | 0.010047354 | 1.551310659 | down |
| Usp47         | 0.010059968 | 1.620498776 | down |
| Syng1         | 0.010059968 | 1.831097484 | up   |
| Rpp40         | 0.010059968 | 1.588795781 | up   |
| 4933404K08Rik | 0.010059968 | 1.799144387 | up   |
| Gtf3c5        | 0.010059968 | 1.67328465  | up   |
| Cldn1         | 0.010059968 | 2.176027298 | up   |
| 1810033B17Rik | 0.010059968 | 1.673642397 | up   |
| Ctsp2         | 0.010065473 | 1.531679392 | up   |
| Cybrd1        | 0.010065473 | 1.770406127 | up   |
| B230353J12Rik | 0.010065473 | 1.740118265 | up   |
| Ssb           | 0.010065473 | 1.570199251 | down |
| Arhgap20      | 0.010065473 | 1.94337976  | up   |
| Il7r          | 0.010065473 | 1.738043547 | up   |
| Adprt2        | 0.010065473 | 1.704805136 | up   |
| Cntrob        | 0.010065519 | 1.559865594 | up   |
| LOC100045688  | 0.010065519 | 1.638296366 | up   |
| Suclg2        | 0.01006832  | 1.683843017 | up   |
| 0610040J01Rik | 0.010098255 | 1.941571832 | up   |
| Camk2a        | 0.010098255 | 1.671045065 | up   |
| Bax           | 0.010098255 | 2.59913969  | up   |
| Dcc           | 0.010098255 | 1.855513096 | down |
| Doc2b         | 0.010100557 | 1.560938716 | up   |
| 4930438B07Rik | 0.010100557 | 1.82436502  | up   |
| Sfrp5         | 0.010100557 | 1.507822037 | up   |
| Gstp1         | 0.010101304 | 1.720479012 | up   |
| LOC240921     | 0.010104514 | 1.79729414  | up   |
| Olf1331       | 0.010104514 | 1.694071412 | up   |
| LOC384313     | 0.010108046 | 1.735565305 | up   |
| A930014I12Rik | 0.010111998 | 1.630590797 | up   |
| Stat4         | 0.010111998 | 2.192642212 | up   |

|                  |             |             |      |
|------------------|-------------|-------------|------|
| Bdnf             | 0.010111998 | 1.702487707 | up   |
| Lip1             | 0.010111998 | 1.640202284 | up   |
| 9530064J02       | 0.010111998 | 1.9157722   | up   |
| Pld5             | 0.010111998 | 1.620617271 | up   |
| A630012P03Rik    | 0.010111998 | 3.847237349 | down |
| Ccdc58           | 0.010111998 | 1.656779289 | up   |
| scl000981.1_40   | 0.010112815 | 2.174271584 | up   |
| Mab21l1          | 0.010112866 | 1.900460005 | down |
| 2310033K02Rik    | 0.010113706 | 1.728074551 | up   |
| 5430435G22Rik    | 0.010113706 | 1.874828219 | up   |
| LOC383456        | 0.010124582 | 1.912583947 | up   |
| Btbd11           | 0.010124582 | 2.153679848 | up   |
| Tacr3            | 0.010124582 | 1.636482    | up   |
| Fbxl18           | 0.010124582 | 1.584769487 | down |
| AK157302         | 0.010124582 | 1.736867666 | up   |
| 2610040L17Rik    | 0.010124582 | 1.710104346 | down |
| Vwa2             | 0.010124582 | 1.701166034 | up   |
| A530051J20Rik    | 0.010124582 | 1.544611812 | up   |
| Cd200            | 0.01013366  | 2.449304104 | up   |
| Wipi1            | 0.01013366  | 2.193827868 | up   |
| Rbpms            | 0.01013366  | 2.178504229 | up   |
| 5830417I10Rik    | 0.010154501 | 1.682996512 | down |
| Inhba            | 0.010167067 | 2.203859806 | up   |
| D630002J18Rik    | 0.010169013 | 1.919835687 | up   |
| Nkx2-2           | 0.010178126 | 2.26326251  | down |
| Nos3             | 0.01018383  | 2.211401463 | up   |
| Adamts7          | 0.01018383  | 1.656754255 | up   |
| Upp1             | 0.01018383  | 1.545446515 | up   |
| Mknk1            | 0.01018383  | 1.735313416 | up   |
| Padi1            | 0.01018383  | 1.597110868 | up   |
| Npc1             | 0.01018383  | 2.358113527 | up   |
| Cebpb            | 0.01018383  | 1.678616881 | up   |
| MJ-6000-172_3824 | 0.01018383  | 1.656733036 | up   |
| Txnrd3           | 0.01018383  | 1.578746557 | up   |
| 6330500D04Rik    | 0.01018383  | 1.766164661 | up   |
| Antxr2           | 0.01018383  | 1.697791338 | up   |
| Osbpl6           | 0.01018383  | 1.717961907 | down |
| Adam4            | 0.01018383  | 1.572851539 | up   |
| Mink1            | 0.010184122 | 1.607851982 | up   |
| Tmem79           | 0.010187298 | 1.647562146 | up   |
| Coq5             | 0.010196088 | 1.914298534 | up   |
| Baz2a            | 0.010199621 | 1.527067423 | down |
| LOC633360        | 0.010199621 | 1.744291663 | up   |
| 4932441K18Rik    | 0.010199802 | 1.581308961 | up   |
| Plekhg3          | 0.010199802 | 1.722677112 | up   |
| Cd44             | 0.010213082 | 1.831806302 | up   |
| Arhgap8          | 0.010213082 | 1.601900935 | up   |
| A730037C10Rik    | 0.010213082 | 1.595314503 | up   |

|                   |             |             |      |
|-------------------|-------------|-------------|------|
| Arhgef4           | 0.010213082 | 1.551455975 | down |
| LOC329240         | 0.010213082 | 1.819801927 | up   |
| 2410016F01Rik     | 0.010213082 | 2.466628552 | down |
| Gss               | 0.010217038 | 1.690559864 | up   |
| Jun               | 0.010224382 | 2.801584482 | up   |
| Sorcs2            | 0.010224382 | 1.928766966 | up   |
| scl0002993.1_1671 | 0.010224382 | 1.907090306 | up   |
| Abat              | 0.010224382 | 2.595728159 | down |
| Afg3l1            | 0.010243389 | 1.557559371 | up   |
| scl0003176.1_43   | 0.010243389 | 1.646537304 | up   |
| Cntd1             | 0.010259579 | 1.743093133 | up   |
| Bambi-ps1         | 0.010266212 | 1.516471863 | up   |
| LOC382153         | 0.010278828 | 1.966159701 | up   |
| Egfl7             | 0.010288999 | 1.650214195 | up   |
| B230107K20Rik     | 0.010289455 | 1.545329928 | up   |
| Ablim2            | 0.010302333 | 1.742497087 | up   |
| Foxk1             | 0.010323258 | 1.6241889   | up   |
| LOC229875         | 0.010323742 | 1.66113472  | up   |
| Ggn               | 0.01032668  | 1.521133542 | up   |
| A130093I21Rik     | 0.010338224 | 1.566944838 | up   |
| Eral1             | 0.010343298 | 1.503149867 | up   |
| 0610038D11Rik     | 0.010343298 | 1.62931037  | up   |
| Fancm             | 0.010348055 | 1.65803957  | down |
| Foxq1             | 0.010362607 | 1.986995697 | up   |
| Gstp1             | 0.010411408 | 2.557179689 | up   |
| Frmf8             | 0.010411408 | 1.641643882 | up   |
| Edaradd           | 0.010411408 | 1.752348661 | up   |
| Rchy1             | 0.010423307 | 1.690673351 | up   |
| LOC381359         | 0.010425204 | 1.837481856 | up   |
| Pcdhb6            | 0.010444157 | 1.606399894 | up   |
| Hif3a             | 0.010457199 | 1.68010354  | up   |
| Zfp187            | 0.010457199 | 1.760539413 | up   |
| Ebf2              | 0.010457199 | 1.842913866 | down |
| Pparg             | 0.010457199 | 1.60936296  | up   |
| Espn              | 0.010457199 | 1.580123186 | up   |
| Camk1g            | 0.010457199 | 1.87213552  | up   |
| Cnih3             | 0.010457199 | 1.655857921 | up   |
| Slc30a9           | 0.010457199 | 1.819581509 | up   |
| LOC100045491      | 0.010457199 | 1.745486736 | up   |
| LOC381362         | 0.010457199 | 1.538586736 | up   |
| LOC100041585      | 0.010457199 | 2.415282726 | down |
| Clmn              | 0.010457199 | 1.59999311  | up   |
| Shroom2           | 0.010457199 | 1.989614606 | up   |
| Nlrp6             | 0.010457199 | 1.617817998 | up   |
| BC004004          | 0.010463444 | 1.615346551 | up   |
| Fosl2             | 0.010464838 | 2.030889034 | up   |
| Slc7a11           | 0.010464838 | 1.922748923 | up   |
| 1700009P03Rik     | 0.010471516 | 1.873085976 | down |

|               |             |             |      |
|---------------|-------------|-------------|------|
| Fam118a       | 0.010503588 | 1.677536368 | up   |
| Gstm6         | 0.010515872 | 1.643243671 | up   |
| Whsc1         | 0.010515872 | 2.009817362 | down |
| Ednra         | 0.010515872 | 2.376912355 | up   |
| 2610042L04Rik | 0.010521354 | 1.583521843 | up   |
| Thnsl2        | 0.010523095 | 1.63825047  | up   |
| LOC382009     | 0.010527131 | 1.940844417 | up   |
| 9330179O15Rik | 0.01054594  | 1.590577841 | up   |
| Dpp4          | 0.010547425 | 2.14354825  | up   |
| LOC100047090  | 0.010547425 | 1.77200067  | up   |
| 4932442L11Rik | 0.01054912  | 2.323912859 | up   |
| Actb          | 0.010575866 | 2.425012589 | down |
| Hvcn1         | 0.010583269 | 2.098302364 | up   |
| Klf10         | 0.010596232 | 1.968455076 | up   |
| Hbb-b1        | 0.010596232 | 2.382575512 | down |
| Tspan8        | 0.010596232 | 1.7260077   | down |
| Prss29        | 0.010598878 | 1.732155323 | up   |
| Ube2t         | 0.010629043 | 2.584891558 | down |
| LOC280487     | 0.010656527 | 3.227423191 | down |
| Olfr503       | 0.010656527 | 1.650408387 | up   |
| Cdh19         | 0.010658056 | 1.980118632 | up   |
| B3galtl       | 0.010663029 | 1.861565471 | up   |
| Olfr1161      | 0.010663029 | 1.579416752 | up   |
| Prkar2b       | 0.010663029 | 1.91885066  | down |
| Shoc2         | 0.010665107 | 1.506416559 | up   |
| Tlr5          | 0.010668595 | 1.629420519 | up   |
| Rab9          | 0.010671971 | 1.627312064 | up   |
| Kif3c         | 0.010695607 | 2.409147978 | down |
| Shcbp1        | 0.010695607 | 1.849149823 | down |
| D16Ertd472e   | 0.010695607 | 1.583073974 | down |
| C030013C21Rik | 0.010700243 | 1.637208819 | up   |
| Gpr27         | 0.010707911 | 1.97866106  | up   |
| Trak2         | 0.010715419 | 1.622221828 | up   |
| Hdac4         | 0.010715419 | 1.53506124  | up   |
| Tnfaip2       | 0.010715419 | 1.799211144 | up   |
| Elf2          | 0.010715419 | 1.779895663 | down |
| Nek3          | 0.010722333 | 1.684841752 | up   |
| D330001F19Rik | 0.010725058 | 1.605007768 | down |
| Rwdd2         | 0.010725058 | 1.694927335 | up   |
| Lgals3        | 0.010732843 | 2.737843514 | down |
| Neurod6       | 0.010732843 | 1.713907242 | down |
| Eya2          | 0.010755229 | 1.58567214  | up   |
| Hlcs          | 0.010756576 | 1.835754395 | up   |
| Eif4e1b       | 0.010760221 | 1.676146388 | up   |
| 4631416M11Rik | 0.010760221 | 1.605516553 | up   |
| Wipi1         | 0.010760221 | 1.80566597  | up   |
| Defb36        | 0.010760221 | 1.562290192 | up   |
| 4631424J17Rik | 0.010761268 | 1.834288001 | down |

|               |             |             |      |
|---------------|-------------|-------------|------|
| Hdc           | 0.01076162  | 1.878775954 | up   |
| Sgcb          | 0.010763219 | 1.523356319 | up   |
| Arf4          | 0.010767346 | 1.944905996 | down |
| Hmcn1         | 0.010767346 | 2.41880703  | up   |
| BC049806      | 0.010775796 | 1.508741498 | down |
| Nagk          | 0.010775796 | 1.683791757 | up   |
| Plxnd1        | 0.01077733  | 1.647153854 | up   |
| Lpgat1        | 0.01077733  | 3.97980094  | down |
| Ifit2         | 0.01077733  | 1.608265281 | up   |
| 2310045L10Rik | 0.01077733  | 2.148965597 | up   |
| Mef2b         | 0.01078061  | 1.606473804 | up   |
| Tenc1         | 0.010784611 | 1.59923029  | down |
| 2610208M17Rik | 0.010784611 | 1.901391029 | up   |
| E330031M19Rik | 0.010821248 | 1.600414753 | down |
| A230050P20Rik | 0.010821248 | 1.616741896 | up   |
| Sfxn4         | 0.010821248 | 1.505086184 | down |
| 4732489I21Rik | 0.010821248 | 1.650205255 | up   |
| Rabggtb       | 0.010821248 | 1.624390602 | up   |
| A630029M15Rik | 0.010821248 | 1.617559314 | up   |
| Xkrx          | 0.010821248 | 1.51066339  | up   |
| Si            | 0.010821248 | 2.492833853 | up   |
| Rps13         | 0.010821248 | 1.508597493 | down |
| 4022450E19Rik | 0.010821248 | 1.548230887 | up   |
| D16Bwg1494e   | 0.010821248 | 1.797379851 | up   |
| 4732458O05Rik | 0.010847346 | 1.851853132 | up   |
| Nudt12        | 0.010860155 | 1.879082084 | up   |
| Ddx26         | 0.010860155 | 1.972530484 | down |
| Nsmaf         | 0.010861693 | 1.773298979 | up   |
| Tmem201       | 0.010866455 | 1.515426159 | up   |
| Tjp3          | 0.010879863 | 1.695411682 | up   |
| Kctd12        | 0.010882232 | 2.749942064 | up   |
| LOC100043609  | 0.010886484 | 1.598501802 | up   |
| D130092D14Rik | 0.010903551 | 1.723791242 | up   |
| Flrt3         | 0.010903551 | 1.648629069 | down |
| Pdlim3        | 0.010939837 | 2.682033539 | up   |
| Rhpn1         | 0.010960905 | 1.836043477 | up   |
| 1700072E05Rik | 0.010960905 | 1.87967062  | up   |
| Cp            | 0.010960905 | 1.718404055 | up   |
| Hoxb5         | 0.010960905 | 2.151054144 | down |
| Ube3a         | 0.010983762 | 5.17346096  | down |
| Slc7a8        | 0.010984358 | 2.080375433 | up   |
| 6530406M24Rik | 0.010993189 | 1.637717843 | up   |
| Mink1         | 0.010993189 | 1.634619474 | up   |
| Yod1          | 0.010993709 | 2.121422529 | down |
| F730003H07Rik | 0.011007063 | 1.864122152 | down |
| Meis1         | 0.011007063 | 1.549613714 | down |
| Msc           | 0.011011572 | 1.783364654 | up   |
| Dph2          | 0.011011572 | 1.525639892 | down |

|                 |             |             |      |
|-----------------|-------------|-------------|------|
| Kank3           | 0.011011572 | 1.58940959  | up   |
| Aqp11           | 0.011011572 | 1.727133036 | up   |
| 4930426D05Rik   | 0.01103376  | 1.927877069 | up   |
| Ptpu            | 0.01103376  | 2.411968231 | up   |
| 5530401J07Rik   | 0.01103376  | 1.547336459 | up   |
| Mthfs           | 0.011034815 | 1.594273329 | up   |
| Epb4.1l3        | 0.011035223 | 1.673310518 | up   |
| Eps8l1          | 0.011038736 | 1.747138858 | up   |
| Ush1c           | 0.011042186 | 1.809464455 | up   |
| Frk             | 0.011056833 | 1.541083217 | up   |
| Bmp1            | 0.011056833 | 1.860135555 | up   |
| scl0001416.1_21 | 0.011056833 | 1.683419824 | up   |
| Stoml1          | 0.011056833 | 1.722013474 | up   |
| Lynx1           | 0.011056833 | 1.686983228 | up   |
| A630072J24Rik   | 0.011056833 | 1.832256794 | down |
| 1700003B17Rik   | 0.011056833 | 1.528068423 | up   |
| Nek6            | 0.011056833 | 1.50329876  | up   |
| LOC100041388    | 0.011056833 | 2.745271683 | down |
| AV249152        | 0.011056833 | 1.850089669 | up   |
| Sc4mol          | 0.011056833 | 1.743438602 | down |
| Slc25a35        | 0.011056833 | 1.623518825 | up   |
| LOC331752       | 0.011056833 | 1.690129757 | up   |
| Gm1141          | 0.011056833 | 1.73587954  | up   |
| Col14a1         | 0.011059135 | 1.706919313 | up   |
| Dclk3           | 0.011059135 | 1.66853416  | up   |
| LOC100041504    | 0.011099011 | 1.78561306  | up   |
| 4932416G22Rik   | 0.011099011 | 1.541840434 | up   |
| A430083B19Rik   | 0.011099011 | 1.779715538 | up   |
| Tmem63b         | 0.011099011 | 2.38227582  | down |
| Rom1            | 0.011099011 | 1.533647656 | up   |
| Sult5a1         | 0.011101321 | 1.642968297 | up   |
| Stmn4           | 0.011101321 | 1.679844499 | up   |
| Dcn             | 0.011101321 | 1.504612088 | up   |
| Tsg101          | 0.011101321 | 2.23314023  | down |
| Mb              | 0.011101321 | 1.653795242 | up   |
| Ccdc62          | 0.011151237 | 1.583951712 | up   |
| Arpc1b          | 0.011152206 | 3.204498053 | up   |
| Dll3            | 0.011164614 | 3.92890954  | down |
| Klhd4           | 0.01116605  | 1.662284851 | up   |
| Pex13           | 0.011176942 | 1.754096985 | up   |
| Arhgap27        | 0.011206553 | 1.80379498  | up   |
| Cmtm7           | 0.011206553 | 1.633191705 | up   |
| 9830143E02Rik   | 0.011206553 | 1.969175935 | down |
| Rbbp7           | 0.01121337  | 1.541571498 | up   |
| Cabin1          | 0.01121337  | 1.713338733 | up   |
| Adamts2         | 0.011218472 | 2.847491264 | up   |
| Csrp3           | 0.011233195 | 1.636179805 | up   |
| 4833424O15Rik   | 0.011265426 | 1.593027949 | up   |

|               |             |             |      |
|---------------|-------------|-------------|------|
| 9430047L24Rik | 0.011267471 | 2.012345552 | down |
| 5430426F23Rik | 0.011267471 | 1.530526161 | up   |
| 4930422I07Rik | 0.011268648 | 1.743861914 | up   |
| Ptcd2         | 0.011283846 | 1.757236362 | up   |
| Asb7          | 0.011283846 | 1.58927846  | up   |
| 9030416H16Rik | 0.011288506 | 1.598853231 | down |
| Tom1l1        | 0.011288506 | 1.984600902 | up   |
| Tnfaip2       | 0.011288506 | 1.765173793 | up   |
| Adamtsl2      | 0.011290228 | 1.870079875 | up   |
| Grm8          | 0.011290228 | 1.525563598 | up   |
| Lcat          | 0.011290228 | 1.563041687 | up   |
| Stxbp1        | 0.011290228 | 1.580361486 | down |
| Efemp2        | 0.011290228 | 1.500731707 | up   |
| Slc41a3       | 0.011290228 | 1.578166723 | up   |
| Olfrc310      | 0.011292169 | 1.769384861 | up   |
| Atxn3         | 0.011297166 | 2.043799639 | up   |
| 2310045K21Rik | 0.011297987 | 2.006486654 | down |
| Rgl3          | 0.011307555 | 1.608974099 | up   |
| Apoc1         | 0.011327446 | 1.570577979 | up   |
| Supt16h       | 0.011337802 | 1.534345388 | up   |
| Ifngr1        | 0.011343291 | 1.574216843 | up   |
| Nsg2          | 0.01134892  | 1.534624696 | up   |
| 2700008B19Rik | 0.01134892  | 1.766015649 | up   |
| Pldn          | 0.011349508 | 1.753665328 | down |
| LOC668978     | 0.011353021 | 1.736880064 | up   |
| A730002K21Rik | 0.011353517 | 1.66293931  | up   |
| Dapk2         | 0.011353517 | 1.687832594 | up   |
| Slc45a2       | 0.011353517 | 2.087293148 | up   |
| Brd8          | 0.011353517 | 1.553807855 | up   |
| Ctbp1         | 0.011372117 | 1.546590805 | up   |
| Tgm1          | 0.011372117 | 1.680336237 | up   |
| Scrn1         | 0.011403981 | 1.710395575 | up   |
| Mmp11         | 0.011403981 | 2.377553701 | up   |
| Tspo          | 0.011403981 | 1.640835285 | up   |
| Acaa2         | 0.01141217  | 2.12840867  | up   |
| Lama5         | 0.011413309 | 1.59391427  | up   |
| Zfp366        | 0.011413309 | 1.672422528 | up   |
| Smtnl2        | 0.011423902 | 3.16843009  | up   |
| Alkbh8        | 0.011423902 | 3.524726868 | down |
| Asb4          | 0.011423902 | 2.067730427 | down |
| BC004728      | 0.011435959 | 1.598439455 | up   |
| Hist1h2ao     | 0.011440333 | 2.653503656 | down |
| LOC100047052  | 0.01145961  | 2.033623934 | down |
| Galc          | 0.011466484 | 1.791874766 | up   |
| Rdh5          | 0.011479498 | 1.650363207 | up   |
| 2610034E13Rik | 0.011479498 | 1.544367313 | up   |
| Calr3         | 0.011492014 | 1.521449924 | up   |
| A930024E05Rik | 0.011505215 | 1.513987064 | up   |

|                |             |             |      |
|----------------|-------------|-------------|------|
| Igf1           | 0.011505215 | 2.030432224 | up   |
| Tmem119        | 0.011510411 | 2.143751383 | up   |
| Dusp16         | 0.011510411 | 2.082497358 | up   |
| LOC385532      | 0.011510411 | 1.794663072 | up   |
| 6430598A04Rik  | 0.011510411 | 2.148559332 | up   |
| Ptprz1         | 0.011510411 | 1.955455542 | down |
| Pa2g4          | 0.011510411 | 7.276388645 | down |
| 2610507B11Rik  | 0.011510411 | 1.598342657 | up   |
| BC020535       | 0.011510411 | 1.756281138 | up   |
| Wdr31          | 0.011512122 | 1.515628338 | up   |
| Cd300a         | 0.011542867 | 1.574785948 | up   |
| 4930488F09Rik  | 0.011542867 | 1.620055795 | up   |
| 9330120H11Rik  | 0.011542867 | 1.512983203 | up   |
| Cyp2f2         | 0.011547794 | 2.035455942 | up   |
| Gcap14         | 0.011547794 | 1.821886778 | down |
| Mall           | 0.011547794 | 1.700117588 | up   |
| Il17rc         | 0.011550861 | 1.590351939 | up   |
| Cd274          | 0.011560827 | 1.644887447 | up   |
| Stx3           | 0.011567494 | 1.806425929 | up   |
| Smox           | 0.011577917 | 1.976448059 | up   |
| Spata19        | 0.011583062 | 1.591976285 | up   |
| Cldn15         | 0.01158365  | 1.727388144 | up   |
| Mcc            | 0.0115845   | 1.996290565 | up   |
| Bcl2l13        | 0.011597067 | 1.887636542 | down |
| Ccdc127        | 0.011597067 | 1.529310584 | up   |
| 2310046K01Rik  | 0.011597067 | 1.599696279 | up   |
| LOC384384      | 0.011597067 | 1.945411801 | up   |
| Arhgdig        | 0.011605384 | 1.661142945 | up   |
| Samm50         | 0.011617559 | 1.691869259 | up   |
| Hspg2          | 0.011617559 | 1.609863281 | down |
| scl0002377.1_1 | 0.011632521 | 1.640759945 | up   |
| Iqca           | 0.011632879 | 1.954819679 | up   |
| Cryz           | 0.011632879 | 1.898544669 | up   |
| Miox           | 0.011632879 | 1.738213658 | up   |
| Col14a1        | 0.011637186 | 2.206558228 | up   |
| LOC332788      | 0.011637186 | 1.530412436 | up   |
| Gatad1         | 0.011637186 | 1.754793286 | down |
| Scmh1          | 0.011637186 | 1.642729163 | down |
| A330009N23Rik  | 0.011637186 | 1.646012902 | up   |
| 2610020C11Rik  | 0.011640362 | 1.654411078 | down |
| Ppfibp2        | 0.011640362 | 1.640716553 | up   |
| Khsrp          | 0.01164239  | 2.094214678 | down |
| 1700028D13Rik  | 0.01164239  | 1.905315876 | up   |
| Itgae          | 0.011650023 | 1.50032568  | up   |
| Camsap1        | 0.011650193 | 6.284976959 | down |
| E430033B07Rik  | 0.011695062 | 7.471291542 | down |
| Adh1           | 0.011696849 | 2.213549376 | up   |
| Mospd1         | 0.01170554  | 1.53570044  | down |



|               |             |             |      |
|---------------|-------------|-------------|------|
| Zcchc11       | 0.01170554  | 1.990891933 | down |
| Adam32        | 0.01170554  | 1.6147753   | up   |
| 5031425D22Rik | 0.01170554  | 1.616536617 | up   |
| C330050A14Rik | 0.01170554  | 2.041301251 | up   |
| A830050C03Rik | 0.011714445 | 1.653364301 | up   |
| 9330134C04Rik | 0.011723714 | 1.896582842 | up   |
| Mtrr          | 0.01173574  | 1.65552938  | up   |
| Fbxo34        | 0.011739329 | 1.988857865 | up   |
| Zfp566        | 0.011740608 | 1.568594933 | down |
| Abhd14a       | 0.011749625 | 1.92773521  | up   |
| Herc1         | 0.011749625 | 1.824690461 | down |
| 4933427G17Rik | 0.011761366 | 1.761082768 | up   |
| 4932411N02Rik | 0.011763196 | 1.621507645 | up   |
| LOC384490     | 0.011770179 | 1.563772559 | up   |
| Acvr1b        | 0.011770179 | 1.574692726 | up   |
| Pold4         | 0.011771417 | 1.705862045 | up   |
| Lym1          | 0.011771417 | 1.564330816 | up   |
| Gprc5b        | 0.011771417 | 2.001590252 | up   |
| Rfesd         | 0.01180018  | 1.502003551 | up   |
| Bxdc5         | 0.011805233 | 2.002387524 | up   |
| 9530058B02Rik | 0.011808085 | 1.680402875 | up   |
| Tacr3         | 0.011808085 | 1.649571657 | up   |
| Hebp1         | 0.011810059 | 2.555747032 | up   |
| Timp2         | 0.011821125 | 1.572137356 | up   |
| Dusp6         | 0.011821125 | 1.823010564 | up   |
| Clcn3         | 0.011823925 | 5.63412714  | down |
| Vmn2r-ps14    | 0.011823925 | 1.542326212 | down |
| 4631433D01Rik | 0.011823925 | 1.662487745 | up   |
| LOC381211     | 0.011824336 | 1.778090715 | up   |
| Acan          | 0.011828069 | 4.83136034  | down |
| Col25a1       | 0.011830881 | 1.686721325 | up   |
| 1700020N15Rik | 0.011830881 | 1.690655351 | up   |
| Atrnl1        | 0.011830881 | 3.97765851  | down |
| Cd80          | 0.011830881 | 1.749535322 | up   |
| 1810019D21Rik | 0.011839077 | 1.565328002 | up   |
| Csrp1         | 0.011839273 | 1.954150319 | up   |
| Ttc28         | 0.011840531 | 3.188261271 | down |
| Lrrc50        | 0.011840531 | 1.704210043 | up   |
| Cyb5d2        | 0.011855832 | 1.692643166 | up   |
| 9030611K07Rik | 0.011855832 | 1.762512803 | up   |
| Snx2          | 0.011855832 | 2.040891409 | up   |
| Lrch1         | 0.011855832 | 1.595708489 | up   |
| Irak4         | 0.011855832 | 1.55948031  | up   |
| Dhrs4         | 0.011855832 | 2.075644732 | up   |
| E030010A14Rik | 0.011855832 | 1.676272988 | up   |
| Rap2b         | 0.011856477 | 1.678804159 | up   |
| Vamp4         | 0.011856477 | 1.706032634 | up   |
| Ch25h         | 0.011901325 | 1.531963229 | up   |

|                |             |             |      |
|----------------|-------------|-------------|------|
| 2810030E01Rik  | 0.011919791 | 1.580499411 | down |
| Fchsd1         | 0.011919791 | 1.565979362 | up   |
| Sirpa          | 0.011922749 | 1.617762208 | up   |
| A230057G18Rik  | 0.011937295 | 1.646129251 | down |
| D130012P04Rik  | 0.011946568 | 1.660106897 | up   |
| Tmem204        | 0.011946568 | 1.852750659 | up   |
| Nol5           | 0.011947446 | 1.735115767 | down |
| Osbpl1a        | 0.011951336 | 1.746912599 | up   |
| Gnai1          | 0.011951336 | 1.896371126 | down |
| Acot2          | 0.011951336 | 1.769756436 | up   |
| Lphn3          | 0.011957283 | 1.501995325 | up   |
| Lhfp           | 0.011957283 | 2.397145271 | up   |
| Fryl           | 0.011957283 | 1.656945348 | down |
| Cxcl12         | 0.011968267 | 2.090909004 | up   |
| B2m            | 0.011969728 | 1.702445984 | up   |
| Igf2bp1        | 0.011969728 | 5.167349815 | down |
| 9630015D15Rik  | 0.011970542 | 1.786219358 | up   |
| Trp63          | 0.011980224 | 3.432834864 | up   |
| Tspan13        | 0.012004233 | 2.623078585 | down |
| 3830406C13Rik  | 0.012004233 | 1.763822675 | up   |
| Cpz            | 0.012004233 | 1.823085785 | up   |
| Gpm6a          | 0.012004233 | 1.517501831 | up   |
| Mcm3ap         | 0.012004233 | 1.575897813 | up   |
| 1500035H01Rik  | 0.012020534 | 1.806617737 | up   |
| Scin           | 0.012042096 | 3.04027009  | down |
| Rfx4           | 0.012042096 | 1.924811006 | down |
| Hbegf          | 0.012042096 | 2.184522867 | up   |
| 9530048O09Rik  | 0.012042096 | 1.754866004 | up   |
| Flot2          | 0.012042096 | 1.732309699 | up   |
| Ahdcd1         | 0.012042096 | 1.549701452 | down |
| Cldn9          | 0.012042096 | 1.798755169 | up   |
| 3110047P20Rik  | 0.012042096 | 1.61097467  | up   |
| Hdac8          | 0.012048183 | 2.034495354 | up   |
| Bace2          | 0.012048183 | 1.835004568 | up   |
| D030069G17Rik  | 0.012052483 | 1.678161025 | down |
| Ubxn8          | 0.012054345 | 1.541211724 | up   |
| Slco1a5        | 0.012054752 | 1.770416856 | up   |
| Pigo           | 0.012054772 | 1.686749935 | up   |
| Phox2b         | 0.012066298 | 1.636369348 | up   |
| scl0003723.1_3 | 0.012080154 | 1.731036305 | up   |
| Srgap3         | 0.012080154 | 1.577518106 | up   |
| Col8a2         | 0.012080154 | 1.783504725 | up   |
| Svep1          | 0.012080154 | 1.949231148 | up   |
| AW146020       | 0.012080154 | 1.638059497 | down |
| Zmym1          | 0.012080154 | 1.515415788 | up   |
| 1810043G02Rik  | 0.012080154 | 1.733139515 | up   |
| Glt8d2         | 0.012092791 | 1.522481918 | up   |
| Hspb3          | 0.012104414 | 1.599420905 | up   |

|                   |             |             |      |
|-------------------|-------------|-------------|------|
| LOC386285         | 0.012106214 | 1.731864572 | up   |
| Gab1              | 0.012111018 | 1.867735624 | up   |
| Ela2              | 0.012111018 | 1.618599415 | up   |
| Lmna              | 0.012111018 | 1.75941813  | up   |
| Vgll2             | 0.012111018 | 1.748288512 | up   |
| Casp8             | 0.012111018 | 1.708166122 | up   |
| Tlcd2             | 0.012112362 | 2.037941217 | up   |
| Zfp50             | 0.012118196 | 1.973639727 | up   |
| Rasa1             | 0.012118196 | 1.679017305 | down |
| Igsf3             | 0.012118196 | 2.070895195 | down |
| Ncapg             | 0.012136094 | 2.25593853  | down |
| Chst11            | 0.012142859 | 1.832973957 | down |
| H2afj             | 0.012154991 | 1.823526502 | down |
| Suz12             | 0.012173476 | 1.758094192 | up   |
| Thsd7a            | 0.012173476 | 1.778657198 | down |
| Tdpoz2            | 0.012173476 | 1.694103122 | up   |
| H2-M3             | 0.012173476 | 1.616079927 | up   |
| Tspan17           | 0.012175052 | 1.734998941 | up   |
| Card10            | 0.012175052 | 1.886260033 | up   |
| Snx19             | 0.012175052 | 1.599865317 | up   |
| Col2a1            | 0.012175052 | 2.746902704 | down |
| Rreb1             | 0.012176498 | 1.613272786 | up   |
| Rasgrf1           | 0.012176498 | 1.806313515 | up   |
| Egfr              | 0.012176498 | 1.74305439  | up   |
| Ascl2             | 0.012195625 | 1.572358847 | up   |
| B430005K18Rik     | 0.012217346 | 1.512902379 | up   |
| 1110031I02Rik     | 0.012217346 | 1.559653163 | up   |
| Rdx               | 0.012217346 | 2.672815085 | down |
| Fusip1            | 0.012217346 | 1.528244495 | up   |
| scl0001849.1_2273 | 0.012217346 | 1.745334864 | down |
| 9430095K15Rik     | 0.01222843  | 1.762827516 | down |
| Pxt1              | 0.012228584 | 1.694844842 | up   |
| Gmcl1             | 0.012232078 | 1.608548164 | down |
| Gstm6             | 0.01223862  | 1.689009309 | up   |
| Acss2             | 0.01223862  | 1.701149583 | up   |
| Tacr1             | 0.012245439 | 1.642027021 | up   |
| Trim34            | 0.012245439 | 1.819759131 | up   |
| Lypd6             | 0.012245439 | 1.614569068 | up   |
| A830007N09Rik     | 0.012245439 | 1.547014117 | up   |
| H2afj             | 0.012245439 | 1.516836047 | down |
| Msi2h             | 0.012245439 | 1.569906712 | down |
| BC016495          | 0.012245439 | 1.574391484 | up   |
| 2810409K11Rik     | 0.012245439 | 1.585009575 | up   |
| LOC100048616      | 0.012257522 | 2.466482639 | down |
| E430021P16Rik     | 0.012264363 | 1.58927834  | up   |
| Stk3              | 0.012277322 | 2.437416554 | up   |
| Ctxn1             | 0.012277322 | 1.515300751 | down |
| 2010007L08Rik     | 0.012282359 | 1.555556417 | up   |

|                |             |             |      |
|----------------|-------------|-------------|------|
| Moxd1          | 0.012315157 | 2.676060677 | up   |
| B930059J09Rik  | 0.012326201 | 1.590711951 | up   |
| D030016E14Rik  | 0.012326201 | 1.598960757 | up   |
| A230107C01Rik  | 0.012326201 | 1.639726877 | up   |
| Metrn          | 0.012326201 | 2.639432669 | up   |
| Tcof1          | 0.012326201 | 5.537293911 | down |
| HPBR11-4       | 0.012326201 | 1.589234114 | up   |
| Adat1          | 0.012333787 | 1.708295822 | up   |
| LOC234582      | 0.012370657 | 1.859015703 | up   |
| Faah           | 0.012381743 | 1.539129734 | up   |
| Zcchc12        | 0.012381743 | 1.586298585 | up   |
| A730054J21Rik  | 0.01239005  | 1.878707051 | down |
| Ube2o          | 0.01239005  | 1.56218338  | down |
| Ric3           | 0.01239005  | 1.631143808 | up   |
| Uso1           | 0.01239005  | 1.944169879 | up   |
| Nab1           | 0.012399819 | 1.925327063 | up   |
| Sox7           | 0.012399819 | 1.825410008 | up   |
| Tgfb2          | 0.012404503 | 1.528139591 | up   |
| Nos3           | 0.012404503 | 1.930089355 | up   |
| Kars           | 0.012404503 | 1.650103092 | up   |
| 9626965_214_rc | 0.012404503 | 1.670157194 | up   |
| Sema3b         | 0.012404503 | 1.55468154  | up   |
| 5930403N24Rik  | 0.012404503 | 1.611163139 | up   |
| Vstm2b         | 0.012404503 | 1.874649525 | up   |
| LOC10047856    | 0.012406936 | 2.004663229 | down |
| A130094L10Rik  | 0.012411513 | 1.726833344 | up   |
| Efcab2         | 0.01241444  | 1.510913014 | up   |
| Ift140         | 0.012429806 | 1.821974278 | up   |
| Akap8          | 0.012429806 | 2.049084425 | down |
| Sesn1          | 0.012429806 | 1.625318408 | up   |
| Olfr1198       | 0.012429806 | 1.854960322 | up   |
| 6720469N11Rik  | 0.012429806 | 1.77593267  | up   |
| Col23a1        | 0.012429806 | 2.248467445 | up   |
| Ddc            | 0.012429806 | 1.98083055  | up   |
| Dgkb           | 0.012429806 | 1.706154347 | up   |
| A230067E15Rik  | 0.012429806 | 1.908667803 | up   |
| Tgif1          | 0.012434861 | 2.285291433 | up   |
| Gstp2          | 0.012456207 | 1.599606276 | up   |
| Gpr27          | 0.012456207 | 1.926563382 | up   |
| 5330431K02Rik  | 0.012456207 | 1.608683229 | down |
| 5330431N19Rik  | 0.012456207 | 1.510100365 | up   |
| Nos3           | 0.012456207 | 2.049824476 | up   |
| B130024G19Rik  | 0.012456207 | 1.804042935 | up   |
| Cmya1          | 0.012456207 | 1.798689008 | up   |
| Lifr           | 0.012458962 | 1.600601077 | up   |
| Slmo1          | 0.012469377 | 1.660951376 | up   |
| Itgb6          | 0.012495746 | 1.526900768 | up   |
| Tbc1d10a       | 0.012500916 | 1.637268424 | up   |

|                |             |             |      |
|----------------|-------------|-------------|------|
| 2410012H22Rik  | 0.012500916 | 1.506266356 | up   |
| Zfp26          | 0.012500916 | 1.586893439 | up   |
| A530064L23Rik  | 0.012505763 | 1.781459928 | down |
| Capg           | 0.012505763 | 1.580980301 | up   |
| D3ErtD300e     | 0.012516508 | 1.958466172 | up   |
| 5730409N16Rik  | 0.012526029 | 1.678104401 | up   |
| Tle3           | 0.012539485 | 1.613103151 | down |
| Clock          | 0.012541889 | 1.684468985 | up   |
| Ovol2          | 0.0125477   | 1.971618772 | up   |
| Hmgcs2         | 0.012549467 | 1.83754611  | up   |
| Bik            | 0.012559793 | 1.895194888 | up   |
| Stx3           | 0.012564512 | 1.710233808 | up   |
| E430002G05Rik  | 0.012564512 | 1.923956871 | up   |
| Arrdc4         | 0.012564512 | 1.847822547 | up   |
| Spag4l         | 0.012567148 | 1.828890324 | up   |
| Ryr3           | 0.012567453 | 1.513333321 | up   |
| Mapk13         | 0.012567453 | 2.042782068 | up   |
| Col4a1         | 0.012567453 | 2.682374954 | up   |
| Mogat2         | 0.012570755 | 1.589121342 | up   |
| Dnajc10        | 0.012570755 | 1.686121702 | up   |
| B130064M22Rik  | 0.012570755 | 1.721751452 | up   |
| Lrrk2          | 0.012586059 | 1.682609081 | up   |
| Tes            | 0.012587901 | 1.577889919 | up   |
| Cd247          | 0.012605749 | 1.833793163 | up   |
| Rpl4           | 0.012608816 | 1.899412274 | down |
| Rnf25          | 0.012617152 | 1.89558363  | up   |
| Gabra3         | 0.012658064 | 1.783182979 | up   |
| LOC383077      | 0.01266209  | 1.519384742 | down |
| Aptx           | 0.01266209  | 1.746626854 | up   |
| Rbm18          | 0.01266209  | 2.32854414  | up   |
| Tmprss5        | 0.01266209  | 1.838545561 | up   |
| Rsf1           | 0.012672777 | 2.011774778 | down |
| Zfp791         | 0.012673094 | 1.601089835 | up   |
| 1700037C18Rik  | 0.012673094 | 1.587375403 | up   |
| Wdr62          | 0.012673094 | 1.502382755 | up   |
| 9830134K01Rik  | 0.012673094 | 1.531498432 | down |
| Manba          | 0.012673094 | 1.667890787 | up   |
| Atp5s          | 0.012679826 | 1.554974794 | up   |
| Ankrd22        | 0.012679826 | 1.674831152 | up   |
| Gzmn           | 0.012695862 | 1.816921473 | up   |
| Btaf1          | 0.012695862 | 2.073349714 | down |
| Etl4           | 0.012695862 | 1.922305465 | up   |
| Tmem183a       | 0.012695862 | 1.510905027 | down |
| Trcg1          | 0.012695862 | 1.997215509 | up   |
| scl0002657.1_5 | 0.012695862 | 1.909353852 | up   |
| Gstcd          | 0.012695862 | 1.739566803 | up   |
| Zcchc18        | 0.012695862 | 1.741515279 | up   |
| Matk           | 0.012695862 | 1.540915251 | up   |

|                 |             |             |      |
|-----------------|-------------|-------------|------|
| LOC100047659    | 0.012708938 | 1.703507543 | up   |
| 5830415F09Rik   | 0.012708938 | 1.622027755 | up   |
| 2810406K13Rik   | 0.012709986 | 2.14847827  | down |
| 1300018J18Rik   | 0.012722744 | 1.787652731 | up   |
| Optrn           | 0.012722744 | 1.730549336 | up   |
| Gas7            | 0.012722744 | 1.828306913 | up   |
| 1700113I22Rik   | 0.012722744 | 1.693020344 | up   |
| Gpd2            | 0.012722744 | 1.948267102 | down |
| LOC385681       | 0.012722744 | 1.618152261 | up   |
| Rffl            | 0.01272374  | 1.875655532 | up   |
| Rprm            | 0.012748334 | 1.770799041 | up   |
| Cdc2l6          | 0.012748334 | 1.851906538 | up   |
| Tpm2            | 0.012748334 | 1.922654033 | up   |
| scl0002275.1_1  | 0.012777639 | 1.519159555 | up   |
| Tmem201         | 0.012789974 | 1.509128809 | up   |
| 9530096D07Rik   | 0.012789974 | 1.645857692 | up   |
| D330038K10Rik   | 0.012792939 | 1.648094177 | up   |
| Arhgap12        | 0.012792939 | 1.598216772 | up   |
| Slc9a2          | 0.012792939 | 1.539561272 | up   |
| Col4a2          | 0.012792939 | 1.961358666 | up   |
| D330037A04Rik   | 0.012810879 | 1.506274223 | up   |
| Tle2            | 0.012810879 | 2.246054649 | up   |
| Chd9            | 0.012811218 | 1.541359901 | down |
| Zbp1            | 0.012811218 | 1.652341247 | up   |
| Olfrc638        | 0.01282654  | 1.841046929 | up   |
| 2010205O06Rik   | 0.01282654  | 1.603883028 | down |
| 1700023B23Rik   | 0.01282654  | 1.738013268 | up   |
| Rtkn2           | 0.01282654  | 1.669357896 | up   |
| Myo1c           | 0.01282654  | 1.879260302 | up   |
| E430021A19Rik   | 0.01282654  | 1.5871737   | up   |
| 2700090O03Rik   | 0.01282654  | 4.646639347 | down |
| C130033H03Rik   | 0.012831846 | 3.533616543 | down |
| C1qtnf6         | 0.012831846 | 1.556827784 | up   |
| LOC240312       | 0.012831846 | 1.966213822 | up   |
| BC024659        | 0.012832207 | 1.630675435 | up   |
| Slc12a1         | 0.012832207 | 1.738138199 | up   |
| scl0001379.1_70 | 0.012832207 | 1.690096617 | up   |
| Rab43           | 0.012832207 | 1.514781714 | up   |
| Klhl31          | 0.012832207 | 1.611522913 | up   |
| Palld           | 0.012840713 | 1.622717738 | up   |
| 2610524G07Rik   | 0.012840713 | 1.849295616 | up   |
| Armcx6          | 0.012842964 | 1.744770885 | up   |
| Serpine2        | 0.012848096 | 1.963433266 | up   |
| Dtl             | 0.012848096 | 1.59987545  | up   |
| 6430526J12Rik   | 0.012849328 | 1.554057241 | up   |
| Osbpl10         | 0.012850302 | 1.558575511 | up   |
| Snhg11          | 0.01285346  | 1.722093344 | up   |
| 4933412E12Rik   | 0.012857186 | 1.580498338 | up   |

|               |             |             |      |
|---------------|-------------|-------------|------|
| Adam24        | 0.012857186 | 1.821695924 | up   |
| Purb          | 0.012857186 | 1.840871215 | down |
| Fxyd5         | 0.012857186 | 2.069130659 | up   |
| Trappc3       | 0.012857186 | 2.624509573 | up   |
| Zfx           | 0.012857186 | 1.662116885 | up   |
| Cyca          | 0.012857186 | 1.542874456 | down |
| Olfml3        | 0.012857186 | 2.854255676 | up   |
| 5730593H20Rik | 0.012868495 | 1.561411738 | up   |
| Pipox         | 0.012868495 | 1.723615646 | up   |
| Lrrc3         | 0.012883328 | 1.509327769 | up   |
| Asl           | 0.01288882  | 1.837278009 | up   |
| Traf1         | 0.01288882  | 1.561558366 | up   |
| Col17a1       | 0.012892193 | 2.151578903 | up   |
| Sos1          | 0.012893601 | 1.515380025 | up   |
| Tbx22         | 0.012895339 | 1.950731993 | up   |
| Gng2          | 0.012908777 | 1.860420585 | up   |
| mKIAA0515     | 0.012908777 | 1.528864622 | up   |
| Wdr13         | 0.012908777 | 2.114797115 | up   |
| Tmem49        | 0.012908777 | 1.716255188 | up   |
| Tnnc2         | 0.012908777 | 1.70280242  | up   |
| Nrbf2         | 0.012908777 | 1.756625056 | up   |
| Lix1          | 0.012908777 | 1.604478955 | up   |
| E330020K23Rik | 0.012908777 | 1.519379139 | down |
| Klh5          | 0.01292166  | 1.647059679 | down |
| Senp7         | 0.01292166  | 1.749804497 | down |
| Gria2         | 0.012924749 | 3.888768911 | down |
| Gpx8          | 0.012939198 | 1.822176814 | up   |
| Prei4         | 0.012959784 | 1.919138789 | up   |
| Ddhd2         | 0.012959784 | 1.815763116 | up   |
| Cog7          | 0.012980813 | 1.605686307 | up   |
| Megf11        | 0.012981579 | 1.626389742 | up   |
| Capg          | 0.012982037 | 2.307087421 | up   |
| Cxcl13        | 0.012996545 | 1.561014772 | up   |
| Senp5         | 0.013002073 | 1.610194445 | up   |
| 2610001E17Rik | 0.013002073 | 1.531848192 | up   |
| Ppp1r13l      | 0.013004345 | 1.629480481 | up   |
| Smyd2         | 0.013011406 | 2.191441298 | up   |
| H2-Q5         | 0.013017764 | 1.760607481 | up   |
| Erbp2         | 0.013017764 | 2.000452042 | up   |
| Ddc8          | 0.013030097 | 1.551798344 | up   |
| Homer1        | 0.013043122 | 1.878014684 | up   |
| Sort1         | 0.013048375 | 1.571092129 | up   |
| Omp           | 0.013052785 | 1.676357746 | up   |
| Usp12         | 0.013065291 | 1.800607562 | up   |
| Myh8          | 0.013082539 | 1.666018248 | up   |
| Mapre2        | 0.013082539 | 1.696675301 | down |
| Mobkl2c       | 0.013082539 | 1.58933425  | up   |
| 1700019N12Rik | 0.013083887 | 2.632347584 | up   |

|                 |             |             |      |
|-----------------|-------------|-------------|------|
| Stx1a           | 0.013083887 | 1.617613077 | up   |
| Mef2c           | 0.013083887 | 1.849823237 | down |
| Txnip           | 0.013083887 | 2.389566183 | up   |
| Gpr155          | 0.013084268 | 1.540424824 | up   |
| Slco3a1         | 0.013098188 | 1.675041556 | up   |
| Ret             | 0.013098188 | 1.752171278 | up   |
| Gm2a            | 0.013099621 | 2.049192429 | up   |
| Piwil1          | 0.013105671 | 1.564337134 | up   |
| E330027P06Rik   | 0.013114644 | 1.581228972 | down |
| EG545253        | 0.013133048 | 1.927534342 | up   |
| 4930579E17Rik   | 0.013141112 | 1.569415569 | up   |
| 1810049N02Rik   | 0.01314389  | 1.941341043 | up   |
| Nudt10          | 0.013150268 | 1.65554738  | down |
| Dbndd2          | 0.013150268 | 1.703242064 | up   |
| Wnt6            | 0.013176431 | 2.33391428  | up   |
| Tmem17          | 0.01317995  | 1.55810988  | up   |
| C130047K18Rik   | 0.01319913  | 1.60621047  | up   |
| Crat            | 0.01319913  | 1.761101842 | up   |
| LOC100043798    | 0.01319913  | 1.667848706 | up   |
| C330013E15Rik   | 0.01319913  | 1.556067944 | up   |
| Ccbp2           | 0.01319913  | 1.657898426 | up   |
| 3632413B07Rik   | 0.01321679  | 1.513736486 | down |
| Accn2           | 0.013218284 | 1.881206751 | down |
| D130007C19Rik   | 0.013218468 | 1.986842871 | down |
| Rassf1          | 0.013218468 | 2.214915991 | up   |
| LOC380741       | 0.013218468 | 1.574386716 | up   |
| Il15            | 0.013218468 | 1.812394142 | up   |
| 4930429A08Rik   | 0.013234877 | 1.798853636 | up   |
| Ttk             | 0.013237063 | 2.500431538 | down |
| Arhgef16        | 0.013237063 | 1.68380928  | up   |
| Trim16          | 0.013246129 | 1.743749976 | up   |
| Zmat4           | 0.013246129 | 1.88993454  | up   |
| Itm2b           | 0.013246129 | 1.63623178  | up   |
| Neurog1         | 0.013246129 | 1.684467912 | up   |
| scl0003949.1_31 | 0.013246129 | 1.526632071 | up   |
| Ly6g6d          | 0.013246129 | 1.887906909 | up   |
| Erbp2ip         | 0.013264354 | 2.249682903 | up   |
| Pfkip           | 0.013264354 | 2.039280653 | up   |
| Pnck            | 0.013266735 | 1.708408237 | up   |
| Rad23b          | 0.013269431 | 1.56151259  | down |
| 4732488M06Rik   | 0.013269613 | 1.664440393 | up   |
| Rapgef6         | 0.013269905 | 1.677681565 | up   |
| Olfir665        | 0.013269905 | 1.753969193 | up   |
| Mbc2            | 0.013269905 | 1.871707082 | up   |
| LOC381140       | 0.013269905 | 1.831867099 | up   |
| Gabarapl1       | 0.013269905 | 2.037134409 | up   |
| E130112L23Rik   | 0.013280982 | 1.592687845 | up   |
| Otog            | 0.01329397  | 2.109349489 | up   |



|                 |             |             |      |
|-----------------|-------------|-------------|------|
| 2610204M08Rik   | 0.013299095 | 2.319484711 | up   |
| Arc             | 0.013309997 | 1.530025601 | up   |
| Ina             | 0.013311707 | 2.131155491 | down |
| Ncam1           | 0.013311707 | 3.885772705 | down |
| Col6a2          | 0.013322825 | 1.604469419 | up   |
| Bcr             | 0.013346478 | 2.248598814 | down |
| Rspo3           | 0.013369494 | 1.756639481 | up   |
| Lypd6           | 0.013379875 | 1.807082057 | up   |
| Dusp6           | 0.013397329 | 1.53362     | up   |
| Slc13a3         | 0.013397329 | 1.656684756 | up   |
| 4921513J16Rik   | 0.013401387 | 1.581577659 | up   |
| Lrrc7           | 0.013402397 | 1.692220926 | up   |
| BC031781        | 0.01341891  | 1.589268327 | down |
| Nedd1           | 0.013449693 | 1.841316819 | down |
| LOC382237       | 0.013483062 | 1.889789343 | down |
| LOC100044862    | 0.013483062 | 2.049538374 | down |
| Hvcn1           | 0.013483062 | 1.953550935 | up   |
| Fgf7            | 0.013487279 | 1.610567689 | up   |
| LOC674960       | 0.013489854 | 2.695344448 | down |
| 4833413E03Rik   | 0.013491326 | 1.625584841 | up   |
| Svil            | 0.013491326 | 1.920827508 | up   |
| 2410091C18Rik   | 0.013491326 | 1.747476816 | up   |
| 1810035L17Rik   | 0.01350009  | 1.741219163 | down |
| Usp33           | 0.013511907 | 2.246424437 | down |
| scl0002368.1_75 | 0.013513994 | 2.23694396  | up   |
| Ski             | 0.013518501 | 1.679907203 | down |
| Tmem16j         | 0.013532957 | 1.684244871 | up   |
| Magee2          | 0.013533409 | 1.83665514  | up   |
| Ercc2           | 0.013533409 | 1.784334898 | up   |
| Kng1            | 0.013533409 | 1.873396277 | up   |
| Col27a1         | 0.013539515 | 1.62655139  | down |
| Klhc5           | 0.013544205 | 1.913423777 | up   |
| Cpt1c           | 0.013572304 | 1.640739441 | up   |
| Dctn1           | 0.013575318 | 1.785241962 | down |
| G430055L02Rik   | 0.013578988 | 1.522780657 | up   |
| Gipc1           | 0.013585857 | 1.569516063 | up   |
| Gad1            | 0.013609231 | 3.400148869 | down |
| Igfbp4          | 0.013611255 | 1.788637281 | up   |
| E230013M07Rik   | 0.013611255 | 1.680230022 | up   |
| Paccin1         | 0.013611255 | 1.596661806 | up   |
| Gm382           | 0.013611255 | 1.656086922 | up   |
| Clns1a          | 0.013611255 | 1.644989371 | up   |
| Pdgfra          | 0.013611255 | 1.561200857 | up   |
| Dom3z           | 0.013616579 | 1.575715065 | up   |
| Npat            | 0.013622694 | 2.451817513 | down |
| Hey2            | 0.013622694 | 1.967078209 | up   |
| Slc6a15         | 0.013626277 | 2.112127066 | up   |
| Sntb1           | 0.013626277 | 1.548276424 | up   |

|                    |             |             |      |
|--------------------|-------------|-------------|------|
| Plcb2              | 0.013626277 | 1.627833486 | up   |
| C130073O12Rik      | 0.013626277 | 2.107435465 | down |
| Mbd6               | 0.013634127 | 1.618043661 | up   |
| LOC381019          | 0.013634127 | 1.809211135 | up   |
| Asah2              | 0.013634127 | 1.868495584 | up   |
| Ift57              | 0.013634127 | 2.54534483  | down |
| Tsen34             | 0.013634127 | 1.633738399 | up   |
| 2810047L02Rik      | 0.013634127 | 1.50482142  | down |
| 1810011O10Rik      | 0.013634127 | 1.522880793 | up   |
| Sult5a1            | 0.013634127 | 1.795954108 | up   |
| Tead4              | 0.013634127 | 1.55796504  | up   |
| Fcgrt              | 0.013634127 | 1.703067899 | up   |
| Loxl1              | 0.013634127 | 1.638782024 | up   |
| Rnpepl1            | 0.013634127 | 1.562986255 | up   |
| Ahnak2             | 0.013634127 | 1.829839945 | up   |
| 1700001L05Rik      | 0.013651146 | 1.602116227 | up   |
| Txndc9             | 0.013651146 | 1.561188817 | up   |
| Glrx5              | 0.013654993 | 1.620049    | down |
| 1110032E23Rik      | 0.013654993 | 1.980955362 | up   |
| Hs3st3b1           | 0.013654993 | 1.7552495   | down |
| Col25a1            | 0.013654993 | 1.512342572 | up   |
| Frmd5              | 0.01365511  | 1.656143069 | up   |
| Tcea2              | 0.013658457 | 1.66322422  | up   |
| Rnf19a             | 0.013658782 | 1.513768196 | up   |
| E330031I04Rik      | 0.013658782 | 1.585134029 | up   |
| Msn                | 0.013665783 | 1.552477598 | up   |
| Rab11fip5          | 0.013665783 | 1.571208239 | up   |
| Arl4c              | 0.013665783 | 1.891957521 | down |
| 1600021P15Rik      | 0.013667509 | 1.7874192   | up   |
| OTTMUSG00000020946 | 0.013667509 | 1.590955973 | up   |
| 6030446N20Rik      | 0.01366932  | 1.664617658 | up   |
| 2810436B12Rik      | 0.013671587 | 1.894216299 | down |
| MacroD1            | 0.013682196 | 1.719940782 | up   |
| Nap111             | 0.013687552 | 1.707957149 | up   |
| Birc2              | 0.013707012 | 1.747507811 | up   |
| Foxo1              | 0.013707012 | 2.203903914 | up   |
| 9830144J08Rik      | 0.013707012 | 1.803768039 | up   |
| Syp                | 0.013726926 | 1.501088858 | down |
| 2700024D06Rik      | 0.013726926 | 1.62184     | up   |
| Acsl5              | 0.013729753 | 1.600696802 | up   |
| Sstr2              | 0.013730879 | 1.86632812  | down |
| LOC100048616       | 0.013791034 | 1.855272889 | down |
| Mad2l1bp           | 0.013791034 | 1.966350675 | up   |
| Zfp36              | 0.013797794 | 1.763923407 | up   |
| Repin1             | 0.013801619 | 1.642057657 | up   |
| B230387C07Rik      | 0.013803557 | 1.979465127 | down |
| B4galt6            | 0.01380568  | 1.585220337 | up   |
| Pdlim2             | 0.01380568  | 1.722751617 | up   |

|               |             |             |      |
|---------------|-------------|-------------|------|
| Dusp28        | 0.013809233 | 1.530064225 | up   |
| 4930544G21Rik | 0.013809233 | 1.634804606 | up   |
| Upf1          | 0.013820853 | 1.605972171 | down |
| Lcat          | 0.013834346 | 1.50973928  | up   |
| Pafah1b1      | 0.013835111 | 1.863887906 | down |
| Mcm7          | 0.013835393 | 2.914779425 | down |
| Abp1          | 0.013835393 | 1.619427919 | up   |
| 2410170E21Rik | 0.013835393 | 1.547989368 | up   |
| Eftud1        | 0.013850171 | 1.511290073 | up   |
| Rsrc2         | 0.013868733 | 1.75848186  | down |
| Heyl          | 0.013874807 | 2.174468756 | up   |
| Agpat2        | 0.013884665 | 1.629495025 | up   |
| Adh5          | 0.013902674 | 1.949717641 | down |
| D230007K08Rik | 0.013913746 | 1.551835418 | up   |
| Anxa6         | 0.013920775 | 1.625330448 | up   |
| 1110003E08Rik | 0.013923276 | 1.524046063 | up   |
| Pcdhb8        | 0.013923276 | 1.683185697 | up   |
| Tspo          | 0.013923276 | 1.532778502 | up   |
| Syng2         | 0.013923276 | 1.573250413 | up   |
| Usp10         | 0.013925021 | 2.52157855  | down |
| Fbxl21        | 0.013928648 | 1.700338483 | up   |
| Erc5          | 0.013952961 | 1.576063037 | down |
| Hnrpa1        | 0.013956532 | 1.902873397 | up   |
| P2rx4         | 0.013969489 | 2.36952281  | up   |
| Angpt1        | 0.013969489 | 2.204510689 | up   |
| Grhl1         | 0.013969522 | 1.689110994 | up   |
| Pno1          | 0.013969522 | 1.926160812 | down |
| Pum2          | 0.013969522 | 1.527429819 | down |
| Ybx2          | 0.013969522 | 1.764156342 | up   |
| Det1          | 0.013983971 | 1.675942421 | up   |
| Anapc11       | 0.013997621 | 1.650258422 | up   |
| Gimap6        | 0.014000086 | 1.667111635 | up   |
| D930020N02Rik | 0.014000086 | 1.678035498 | up   |
| Tbxa2r        | 0.014000086 | 1.663612247 | up   |
| Ctsw          | 0.014000086 | 1.725126505 | up   |
| Setd6         | 0.014000086 | 1.6902951   | up   |
| Phka2         | 0.014000086 | 1.793971777 | up   |
| 1810062G17Rik | 0.01400717  | 1.560486317 | up   |
| Tmtc2         | 0.014017923 | 1.687301159 | up   |
| 6330416G13Rik | 0.014028094 | 1.870222926 | up   |
| Nisch         | 0.014028094 | 2.552846432 | down |
| Adam23        | 0.014048461 | 2.003586531 | up   |
| Dpysl4        | 0.014058662 | 1.761554241 | down |
| 4930584N22Rik | 0.014058662 | 1.702664852 | up   |
| Eya4          | 0.014064595 | 1.789567709 | up   |
| Lce3c         | 0.014064595 | 1.551779747 | up   |
| Mfap4         | 0.014064733 | 2.381771803 | up   |
| D030020M24Rik | 0.014064733 | 1.570013762 | up   |

|               |             |             |      |
|---------------|-------------|-------------|------|
| LOC383099     | 0.014077373 | 1.788389921 | down |
| LOC380923     | 0.014086179 | 1.583407164 | up   |
| A1875142      | 0.014086179 | 1.770733833 | up   |
| Paox          | 0.014097165 | 1.672313929 | up   |
| Add3          | 0.014109118 | 2.550353766 | up   |
| Madd          | 0.014110732 | 1.632431388 | up   |
| LOC382421     | 0.014124274 | 1.661821961 | up   |
| LOC382102     | 0.01412527  | 1.555842519 | up   |
| 2810474019Rik | 0.01412527  | 4.609839916 | down |
| LOC383092     | 0.01412527  | 1.572983861 | up   |
| LOC277837     | 0.01412527  | 1.813723922 | down |
| C730029A08Rik | 0.01412527  | 1.71424365  | up   |
| Mapk10        | 0.01412527  | 2.018272877 | down |
| Eif2s2        | 0.01412527  | 1.508484244 | up   |
| Zfp703        | 0.01415264  | 1.685684443 | up   |
| Wdr31         | 0.01415264  | 1.564507008 | up   |
| Scml4         | 0.01415264  | 1.782431245 | up   |
| 2900011L18Rik | 0.01415264  | 1.886803865 | down |
| 1810064L21Rik | 0.014164309 | 2.083154202 | up   |
| Plekha4       | 0.014164309 | 1.899433494 | up   |
| Pcsk9         | 0.014164309 | 1.775391221 | up   |
| Myrip         | 0.014177469 | 1.641140223 | up   |
| Olfr166       | 0.0141776   | 1.747463226 | up   |
| B3galt1       | 0.014201336 | 2.86161685  | down |
| Prpf31        | 0.014210763 | 1.795861125 | up   |
| Dgka          | 0.014212452 | 2.297182322 | up   |
| Cyhr1         | 0.014218831 | 1.716747403 | up   |
| Nradd         | 0.014218831 | 1.98875165  | up   |
| Auh           | 0.014218831 | 1.553457499 | up   |
| Plxnd1        | 0.014218872 | 2.074588776 | up   |
| Tsc22d3       | 0.014218872 | 1.615373969 | up   |
| Htr3a         | 0.014220302 | 2.059222221 | up   |
| Alcam         | 0.014223813 | 3.924258232 | down |
| Casp7         | 0.014224262 | 2.180449009 | up   |
| Synj2         | 0.014240557 | 1.641053677 | up   |
| Sergef        | 0.014243893 | 1.677181482 | up   |
| Tmem62        | 0.014243893 | 1.811025262 | up   |
| C330006H24Rik | 0.014245119 | 1.736635566 | up   |
| Tmed4         | 0.014245119 | 1.775812268 | up   |
| Ica1          | 0.014245119 | 1.667012453 | up   |
| Egln1         | 0.014245119 | 1.546107292 | up   |
| Crls1         | 0.014245119 | 1.510665774 | up   |
| 2810403A07Rik | 0.014245119 | 1.660168648 | down |
| 1700041B20Rik | 0.014253892 | 1.544244885 | up   |
| Tnmd          | 0.014255907 | 1.557863236 | up   |
| Crry          | 0.014257797 | 1.596698523 | up   |
| Igfbp3        | 0.01428549  | 2.336178064 | up   |
| Pfdn2         | 0.014290274 | 1.936927915 | up   |

|                |             |             |      |
|----------------|-------------|-------------|------|
| Chrna4         | 0.014300482 | 1.716660023 | down |
| LOC433886      | 0.014306307 | 1.533434153 | up   |
| Itch           | 0.014318481 | 1.681077004 | down |
| 2310007H09Rik  | 0.014330474 | 1.752916455 | up   |
| Atg4c          | 0.014330474 | 1.544730544 | up   |
| Vrk2           | 0.014330474 | 1.834310412 | up   |
| Elmo1          | 0.014367481 | 1.722578287 | up   |
| Mtcp1          | 0.014367481 | 1.784079671 | up   |
| 4832408C21Rik  | 0.014367481 | 1.642045617 | down |
| Saal1          | 0.014367481 | 1.638142943 | up   |
| Olfr267        | 0.014370917 | 1.562190294 | up   |
| Snx19          | 0.014370917 | 1.590021849 | up   |
| Gga2           | 0.014374672 | 2.126532793 | up   |
| Rnf19a         | 0.014401651 | 1.563728333 | up   |
| Mbtps2         | 0.014413244 | 1.532248855 | up   |
| Ap4m1          | 0.014413244 | 1.759465694 | up   |
| Mapkapk3       | 0.014413244 | 1.81407094  | up   |
| Stx8           | 0.014414357 | 1.503189087 | up   |
| scl000528.1_16 | 0.014420311 | 1.554077268 | up   |
| Dcbld2         | 0.014420311 | 1.717579365 | up   |
| LOC241262      | 0.014420311 | 1.630625606 | up   |
| Gm960          | 0.014428946 | 1.647107601 | up   |
| 2900052M09Rik  | 0.014433549 | 1.657208085 | up   |
| 4833436C18Rik  | 0.014448089 | 1.631286502 | up   |
| 2310058D17Rik  | 0.014455225 | 1.558657765 | up   |
| Mllt3          | 0.014481396 | 1.572801113 | down |
| Il23a          | 0.014484429 | 1.766286612 | up   |
| 2010204N08Rik  | 0.014493306 | 1.709066033 | up   |
| 4931408A02Rik  | 0.014494159 | 1.554969788 | up   |
| Pkp3           | 0.014494159 | 1.582759023 | up   |
| Ptar1          | 0.014494159 | 1.687353253 | up   |
| Antxr2         | 0.014494159 | 1.591258168 | up   |
| A830007F21Rik  | 0.014494159 | 1.584760547 | up   |
| LOC623466      | 0.014512978 | 1.620241165 | up   |
| Lingo2         | 0.014517918 | 1.716675162 | up   |
| 5430405C01Rik  | 0.014530717 | 1.673426867 | up   |
| Slc38a2        | 0.014549396 | 1.7501899   | up   |
| 1700025G04Rik  | 0.014550493 | 2.360963821 | down |
| 2210419D22Rik  | 0.014564308 | 1.819339275 | up   |
| Pttg1ip        | 0.014580193 | 2.390427828 | up   |
| Mtap1b         | 0.014585038 | 2.097805023 | down |
| Gjb5           | 0.014594515 | 1.674165487 | up   |
| Ccdc114        | 0.014621565 | 1.693051457 | up   |
| Atp6v1c2       | 0.014628421 | 1.887662649 | up   |
| LOC100046746   | 0.014628812 | 3.623121738 | down |
| Sphk1          | 0.014646932 | 2.023423195 | up   |
| Clk4           | 0.014646932 | 1.539265275 | down |
| Pip5k1c        | 0.014647911 | 1.713070989 | up   |

|                 |             |             |      |
|-----------------|-------------|-------------|------|
| Pias2           | 0.014650574 | 2.012918711 | up   |
| 1700027A23Rik   | 0.014650574 | 1.573133707 | up   |
| Fgd5            | 0.014650574 | 1.583142996 | up   |
| Col2a1          | 0.014667247 | 2.265813828 | down |
| scl0003020.1_1  | 0.014667247 | 1.68411541  | up   |
| Megf9           | 0.014682405 | 1.756153822 | down |
| scl0001544.1_68 | 0.014688253 | 1.619564295 | up   |
| Olfr352         | 0.014724299 | 1.65255475  | up   |
| 2010311D03Rik   | 0.014730224 | 1.713189364 | up   |
| Tgfb2           | 0.014732455 | 4.134972572 | down |
| 4432404P07Rik   | 0.014732455 | 2.896472216 | down |
| Rasl11b         | 0.014732455 | 2.123251438 | up   |
| Igf1            | 0.014738426 | 2.360509396 | up   |
| AI507611        | 0.014739122 | 1.624577761 | up   |
| Arl2bp          | 0.014741469 | 1.97984755  | up   |
| Peli3           | 0.014745706 | 1.644215226 | up   |
| Olfr270         | 0.014745706 | 1.669532299 | up   |
| Prrg1           | 0.014750493 | 1.857349992 | up   |
| Rffl            | 0.014764269 | 1.621606946 | up   |
| mKIAA1686       | 0.014772357 | 1.645732403 | up   |
| 4632427K15Rik   | 0.014772357 | 1.523310423 | down |
| Gtf2h1          | 0.014772357 | 1.76902163  | up   |
| Sec22l3         | 0.014772357 | 2.232342005 | down |
| Sumo3           | 0.014779127 | 2.12762022  | up   |
| B130017M24Rik   | 0.014801525 | 1.729433656 | up   |
| Vim             | 0.014811567 | 1.553122878 | up   |
| Prrx2           | 0.014824606 | 1.711831927 | up   |
| 1110008J03Rik   | 0.014824606 | 1.766311765 | up   |
| Zfp111          | 0.014831599 | 1.600939274 | up   |
| 4631416L12Rik   | 0.014831599 | 2.401184797 | up   |
| B430110C06Rik   | 0.014833784 | 1.655187964 | up   |
| Nsmaf           | 0.014833784 | 2.10326004  | up   |
| 4833421E05Rik   | 0.014834432 | 1.561596274 | up   |
| LOC224532       | 0.014842451 | 2.562713623 | up   |
| Larp-pending    | 0.014843697 | 1.591766357 | up   |
| Bbs12           | 0.014863434 | 1.653618217 | up   |
| Rad51l3         | 0.014863434 | 1.548033953 | up   |
| Bbx             | 0.014863434 | 3.876441717 | down |
| LOC386112       | 0.014863434 | 4.158618927 | down |
| LOC627626       | 0.014863434 | 1.516692996 | up   |
| Foxred1         | 0.014863434 | 1.602311254 | up   |
| Zfp622          | 0.014875645 | 1.717239976 | up   |
| Lyzs            | 0.014875645 | 2.604290247 | down |
| Ptprv           | 0.014875645 | 1.889452219 | up   |
| Fnbp1           | 0.014880369 | 1.514274001 | up   |
| 1110034A24Rik   | 0.014903376 | 2.949354172 | down |
| Gls             | 0.01490956  | 1.942672491 | up   |
| H47             | 0.014909916 | 1.649338722 | down |

|               |             |             |      |
|---------------|-------------|-------------|------|
| Daglb         | 0.014912994 | 1.75685072  | up   |
| Rnf213        | 0.014913261 | 1.866276145 | up   |
| 2010015J01Rik | 0.014913261 | 1.633465767 | up   |
| Ptgis         | 0.014913261 | 1.936197639 | up   |
| 2610524H06Rik | 0.014915748 | 1.691795707 | up   |
| BC014795      | 0.014926729 | 1.511735797 | up   |
| Olfr1437      | 0.014926729 | 1.829902172 | up   |
| As3mt         | 0.014926729 | 1.978042603 | up   |
| Arhgap20      | 0.014926729 | 1.717409968 | up   |
| 2700060E02Rik | 0.014926729 | 1.762716532 | up   |
| Fn3k          | 0.014939282 | 1.660053372 | up   |
| Gabrp         | 0.014939282 | 1.616749406 | up   |
| D230040E23    | 0.014942837 | 1.51877892  | up   |
| Inadl         | 0.014942837 | 1.922322393 | up   |
| Thns12        | 0.014948658 | 1.639492273 | up   |
| 2210404O07Rik | 0.014964229 | 1.598262668 | up   |
| Fgf1          | 0.014990621 | 1.616851687 | up   |
| Tapbp         | 0.014990621 | 1.529372096 | up   |
| Gm784         | 0.014990621 | 1.597453356 | up   |
| Slc35a3       | 0.014990621 | 1.524765372 | up   |
| A730089E01Rik | 0.014990621 | 1.806908608 | down |
| Nif3l1        | 0.014990621 | 1.509633184 | up   |
| Prr12         | 0.014990621 | 1.5633111   | up   |
| Tle2          | 0.015003369 | 2.098104954 | up   |
| Sdf2          | 0.01504455  | 1.863868475 | up   |
| Stap2         | 0.015047802 | 1.619958282 | up   |
| 1190002H23Rik | 0.015052724 | 1.538797021 | up   |
| Sorl1         | 0.015059365 | 1.710558295 | down |
| LOC386186     | 0.015072259 | 1.60037303  | up   |
| Pax1          | 0.015082571 | 1.610585928 | up   |
| Rpl21         | 0.015082571 | 1.556022644 | up   |
| Tgfb3         | 0.015102916 | 2.167383194 | up   |
| Ccdc39        | 0.015135118 | 1.613043547 | up   |
| Rnf130        | 0.015140302 | 1.514383078 | up   |
| Myl6          | 0.015140302 | 1.684257507 | up   |
| Fermt1        | 0.015154142 | 2.125511169 | up   |
| Morn3         | 0.01515819  | 1.78691411  | up   |
| Ckmt1         | 0.015176937 | 1.796265841 | up   |
| Slc34a1       | 0.015176937 | 1.597052932 | up   |
| Pclo          | 0.015176937 | 1.637142658 | up   |
| Gsdmdc1       | 0.015176937 | 1.948074579 | up   |
| 2610001J05Rik | 0.015176937 | 1.686969757 | up   |
| BC024139      | 0.015182142 | 2.274022341 | down |
| Cdh15         | 0.015182142 | 1.886306167 | up   |
| Tcfap2c       | 0.015184633 | 2.369262219 | up   |
| LOC100047837  | 0.015190722 | 1.855508804 | down |
| Cdh3          | 0.015194433 | 1.588147759 | up   |
| lah1          | 0.015194433 | 1.873577833 | up   |

|                 |             |             |      |
|-----------------|-------------|-------------|------|
| EG545216        | 0.015194433 | 6.050276279 | down |
| LOC232974       | 0.01522027  | 1.582114935 | up   |
| Ddit3           | 0.01522027  | 2.218580246 | up   |
| Dhx58           | 0.01522027  | 1.726668596 | up   |
| Taf7            | 0.015235992 | 1.597987771 | up   |
| Dnahc9          | 0.015256922 | 1.635884285 | up   |
| Faim            | 0.015256922 | 1.587582946 | down |
| Edg3            | 0.015256922 | 1.722615957 | up   |
| LOC668047       | 0.015256922 | 2.542768002 | down |
| Hoxd13          | 0.015256922 | 2.149003744 | up   |
| Dagla           | 0.015261078 | 1.714764834 | up   |
| Pld1            | 0.015264832 | 1.599910617 | up   |
| LOC381375       | 0.015265875 | 1.604890108 | up   |
| Trrp1           | 0.015265875 | 1.674335241 | up   |
| Cpa3            | 0.01527503  | 1.761353493 | up   |
| Wdsof1          | 0.01527503  | 2.105128288 | down |
| 2410008A19Rik   | 0.015280085 | 1.567484379 | up   |
| Eps8l2          | 0.015300641 | 1.649840236 | up   |
| C330036H15Rik   | 0.015301053 | 1.631038308 | up   |
| Serpinb6a       | 0.015301053 | 2.102301598 | up   |
| Gja5            | 0.015301053 | 2.181316137 | up   |
| Hspb8           | 0.01530246  | 2.084914208 | up   |
| Dysf            | 0.015305009 | 1.529547811 | up   |
| Irf1            | 0.015305009 | 1.827239752 | up   |
| Rfx1            | 0.015324852 | 1.734866142 | up   |
| Cux1            | 0.015335555 | 1.760463476 | down |
| Aqp1            | 0.015336008 | 2.098461151 | up   |
| 1110035H17Rik   | 0.015359527 | 1.737440944 | up   |
| Rfc1            | 0.015359527 | 1.612091661 | up   |
| Upk2            | 0.015359527 | 1.896573186 | up   |
| Nrbp2           | 0.015359527 | 1.794901729 | up   |
| Tspan15         | 0.015377536 | 1.526413918 | up   |
| Ptpn11          | 0.015380763 | 1.648685455 | up   |
| Dgkb            | 0.015382416 | 1.540017366 | up   |
| Nqo2            | 0.01538295  | 1.760188937 | up   |
| AW124722        | 0.015386781 | 1.768404603 | up   |
| Ncstn           | 0.015386781 | 1.897603989 | down |
| Decr2           | 0.015399882 | 1.796769381 | up   |
| Ing4            | 0.015399882 | 1.761608839 | up   |
| Mst1            | 0.0154318   | 1.615269184 | up   |
| Slc25a11        | 0.015435619 | 2.4178195   | up   |
| 6230412O07Rik   | 0.015445104 | 1.684808135 | up   |
| Pabpc1          | 0.015449311 | 1.883055449 | up   |
| scl0002223.1_98 | 0.015460342 | 1.510006428 | down |
| Crb1            | 0.015477028 | 1.519437194 | up   |
| Gas2l1          | 0.01549784  | 1.680579901 | up   |
| Prmt6           | 0.01549784  | 1.552326798 | up   |
| Mxra8           | 0.015513633 | 1.585093021 | up   |



|               |             |             |      |
|---------------|-------------|-------------|------|
| A930011O12Rik | 0.015522184 | 2.90604043  | down |
| LOC100044468  | 0.015523958 | 1.84954071  | down |
| Junb          | 0.01555189  | 1.767952919 | up   |
| Klhl13        | 0.01555189  | 4.878860951 | down |
| 9629514_325   | 0.015555255 | 1.536189318 | up   |
| Ggcx          | 0.015566977 | 1.810103059 | up   |
| Kif16b        | 0.015566977 | 1.816019297 | up   |
| Poli          | 0.015570754 | 1.531311512 | up   |
| AI987944      | 0.015570754 | 1.702910543 | up   |
| Smek2         | 0.015570754 | 3.407826662 | down |
| Kcnj10        | 0.015570754 | 1.558370829 | up   |
| Abcc6         | 0.015570754 | 1.665177465 | up   |
| A830019P03Rik | 0.015584946 | 1.749596238 | up   |
| Fdxr          | 0.015611158 | 1.543902755 | up   |
| Sdccag33l     | 0.015611158 | 1.75575757  | down |
| Tuft1         | 0.015611158 | 1.694327235 | up   |
| Arhgap28      | 0.015611158 | 1.562302589 | up   |
| Kcnmb1        | 0.015623871 | 1.640515566 | up   |
| D14Ertd668e   | 0.015634487 | 1.620386243 | up   |
| Stac3         | 0.015634487 | 1.654299259 | up   |
| 2210010B09Rik | 0.015634487 | 1.71366787  | up   |
| 1300011L04Rik | 0.015672548 | 1.864464402 | up   |
| Llg12         | 0.015672548 | 1.54646492  | up   |
| G3bp1         | 0.015702609 | 1.583943844 | up   |
| Ttn           | 0.015709428 | 1.53362596  | up   |
| Slc14a2       | 0.015712598 | 1.54462719  | up   |
| Rpgr          | 0.015712598 | 1.589429617 | up   |
| Col17a1       | 0.015712598 | 1.66506803  | up   |
| 0610010E21Rik | 0.015712598 | 1.702003598 | down |
| Hopx          | 0.015712598 | 2.21042347  | down |
| Pwwp2b        | 0.015712598 | 1.738709688 | up   |
| LOC100039175  | 0.015712598 | 1.738140464 | up   |
| Il18bp        | 0.015718319 | 1.725533962 | up   |
| Dnajc19       | 0.0157797   | 1.548030853 | up   |
| Dek           | 0.0157797   | 6.360548019 | down |
| Spin2         | 0.015788345 | 1.793452263 | up   |
| Ifitm1        | 0.01579231  | 1.962481976 | up   |
| LOC670044     | 0.015807653 | 1.5104146   | up   |
| 6030408C04Rik | 0.015809959 | 1.69873476  | down |
| Vegfc         | 0.015812602 | 1.64735055  | up   |
| Pdgfb         | 0.015815824 | 1.928518772 | up   |
| Pi16          | 0.015815824 | 1.572577477 | up   |
| Lims2         | 0.01582339  | 1.615815043 | up   |
| 1190005I06Rik | 0.01582339  | 1.753389835 | up   |
| Ube2e1        | 0.015824881 | 1.688503385 | up   |
| Gpr1          | 0.015824881 | 1.725373387 | up   |
| Zfp277        | 0.015824881 | 1.588775158 | up   |
| Sfrs5         | 0.015855072 | 2.319268465 | up   |

|                 |             |             |      |
|-----------------|-------------|-------------|------|
| Slc24a3         | 0.0158576   | 1.602561235 | up   |
| Krt14           | 0.015859652 | 5.577585697 | up   |
| Cyp2j9          | 0.015859652 | 1.525645852 | up   |
| C330006P03Rik   | 0.015868926 | 1.683944106 | down |
| Kat5            | 0.015886607 | 1.606329083 | up   |
| scl0002337.1_39 | 0.015895378 | 1.860794783 | up   |
| E130001F20Rik   | 0.015895378 | 1.699567795 | up   |
| Ezh1            | 0.015895378 | 1.571545243 | up   |
| Ppap2a          | 0.015900277 | 1.625725627 | up   |
| Clec11a         | 0.015901094 | 1.841278553 | up   |
| Colec12         | 0.01591206  | 1.744508863 | up   |
| Olfir748        | 0.015924279 | 1.878022671 | up   |
| Pkn2            | 0.015924279 | 1.831421852 | down |
| Ndrp2           | 0.015924279 | 2.341609716 | down |
| Tmem176a        | 0.015924279 | 1.56439805  | up   |
| 1700030J22Rik   | 0.015924279 | 1.529548526 | up   |
| Rhov            | 0.015924359 | 1.705793262 | up   |
| Bag4            | 0.015926981 | 1.54095614  | up   |
| Dnajc28         | 0.015952224 | 1.623480201 | up   |
| Syap1           | 0.015976781 | 1.50850904  | up   |
| 1810046K07Rik   | 0.015976781 | 1.597674608 | up   |
| Abca2           | 0.015976781 | 1.623272419 | up   |
| Ndst1           | 0.015976781 | 1.568942547 | down |
| Ankrd11         | 0.015976781 | 1.871367455 | down |
| Sorcs1          | 0.015976781 | 1.559650183 | up   |
| Fam102a         | 0.015976781 | 1.700731516 | up   |
| Rarres2         | 0.015976781 | 2.030186653 | up   |
| Ptpru           | 0.015983593 | 2.041645289 | up   |
| Steap2          | 0.015986154 | 1.779416561 | up   |
| Dll4            | 0.01599353  | 1.669487715 | up   |
| Atp8b1          | 0.016004279 | 1.733767867 | up   |
| Cnot4           | 0.016018091 | 2.203994751 | down |
| Klf4            | 0.016032334 | 1.602704167 | up   |
| LOC330134       | 0.016032873 | 1.597900987 | up   |
| 3110035E14Rik   | 0.016032873 | 1.559252024 | down |
| 4732462B05Rik   | 0.016043887 | 1.77134347  | down |
| Wdr59           | 0.016043887 | 1.597825289 | up   |
| D430020J02Rik   | 0.016043887 | 1.59990859  | up   |
| Ccdc82          | 0.016051238 | 1.595047355 | up   |
| Ino80           | 0.016054813 | 1.616994739 | up   |
| Mks1            | 0.016075429 | 1.507858634 | up   |
| Psmc4           | 0.016090656 | 1.606945515 | up   |
| Sbsn            | 0.016090656 | 1.549102068 | up   |
| Copb2           | 0.016118703 | 1.599265814 | down |
| Setd6           | 0.016118703 | 1.633074284 | up   |
| Svop            | 0.016118703 | 1.900954962 | down |
| Epha7           | 0.016131142 | 2.36863327  | up   |
| Pex26           | 0.016149512 | 1.788718343 | up   |

|               |             |             |      |
|---------------|-------------|-------------|------|
| Cited1        | 0.016149512 | 1.599921107 | up   |
| Magmas        | 0.016153956 | 1.532277346 | down |
| Fbxw17        | 0.016172359 | 2.030739546 | up   |
| Emilin3       | 0.016210258 | 1.661230207 | up   |
| Mtap2         | 0.016215332 | 2.891719818 | down |
| Col6a3        | 0.016216913 | 1.879945278 | up   |
| LOC333459     | 0.016224878 | 1.674965859 | up   |
| Zc3h18        | 0.016224898 | 2.65169549  | down |
| Pnlcd1        | 0.016224898 | 1.581427336 | up   |
| Heca          | 0.016224898 | 1.738848686 | up   |
| Sgip1         | 0.016224898 | 1.610694766 | up   |
| Gins1         | 0.016224898 | 2.134769678 | up   |
| Lsr           | 0.016254855 | 1.807268739 | up   |
| Chrm3         | 0.016258748 | 1.576372027 | up   |
| Terf2         | 0.016258748 | 1.684105873 | down |
| Mar-10        | 0.016261362 | 1.589142799 | up   |
| LOC100045522  | 0.016272966 | 1.563743115 | up   |
| Cbfa2t3h      | 0.016272966 | 1.518231273 | down |
| Nnmt          | 0.016272966 | 1.736355305 | up   |
| Cops5         | 0.016274514 | 1.505086184 | down |
| 4930402124Rik | 0.016274979 | 2.281369448 | down |
| Gldn          | 0.016274979 | 1.729434252 | up   |
| Parva         | 0.016275929 | 2.095227003 | up   |
| LOC677144     | 0.016275929 | 1.549839497 | up   |
| Dysf          | 0.016276673 | 1.574743271 | up   |
| B130008O17Rik | 0.016278623 | 1.681232572 | down |
| Klhdc8b       | 0.016278623 | 1.614795566 | up   |
| Kcnj5         | 0.016278623 | 1.514858723 | up   |
| 0610010E21Rik | 0.016278623 | 1.796568394 | down |
| Rassf2        | 0.016278623 | 1.706613541 | up   |
| Slc24a2       | 0.016309332 | 1.517876148 | up   |
| 3000003G13Rik | 0.016329374 | 1.69746232  | down |
| Prss8         | 0.016329374 | 1.644970894 | up   |
| LOC100040505  | 0.016350823 | 1.567203522 | up   |
| C530044C16Rik | 0.016366422 | 1.522976637 | up   |
| Pthr1         | 0.016374717 | 1.626769424 | up   |
| Usp46         | 0.016374717 | 1.752451301 | up   |
| Shisa2        | 0.016377427 | 1.638281584 | up   |
| Phlpp         | 0.016379349 | 1.530176282 | down |
| Acbd4         | 0.016387666 | 1.589290977 | up   |
| 9130213B05Rik | 0.016400479 | 1.882205248 | up   |
| C030026E19Rik | 0.016400479 | 1.640537381 | up   |
| Fv1           | 0.016405623 | 1.695414066 | up   |
| 1110049N09Rik | 0.016421571 | 1.575163722 | up   |
| D11Bwg0280e   | 0.016426234 | 1.613652825 | up   |
| Eya1          | 0.016426234 | 2.043495178 | up   |
| Pla2g10       | 0.016432229 | 1.551245809 | up   |
| Dynll2        | 0.016462905 | 2.353850842 | up   |

|                |             |             |      |
|----------------|-------------|-------------|------|
| Asph           | 0.016462905 | 1.914113045 | up   |
| 1810022O10Rik  | 0.016462905 | 1.738990545 | down |
| Myeov2         | 0.016462905 | 1.703793526 | down |
| Serpina1a      | 0.01646312  | 1.673175216 | up   |
| Ppap2c         | 0.016507382 | 1.577884793 | up   |
| E130309F12Rik  | 0.016513169 | 1.818326473 | up   |
| LOC670356      | 0.016520541 | 2.187096119 | down |
| Hey2           | 0.016543159 | 1.881920815 | up   |
| Aebp2          | 0.016550323 | 1.62104094  | up   |
| Mrg1           | 0.016588008 | 2.256049633 | down |
| Muc2           | 0.016588008 | 1.506180763 | up   |
| 9630025H16Rik  | 0.016588008 | 1.662733913 | down |
| 1300007L22Rik  | 0.016588008 | 1.778340697 | up   |
| Ogn            | 0.016588008 | 2.169056892 | up   |
| Il28ra         | 0.016599085 | 1.824501157 | up   |
| Hel308-pending | 0.016599085 | 1.662665963 | up   |
| Hoxd11         | 0.016620832 | 1.634416461 | up   |
| 6430514E13Rik  | 0.016634196 | 1.502450347 | up   |
| Ppapdc1b       | 0.016652731 | 1.798686862 | up   |
| Clcn3          | 0.016652731 | 1.885497212 | down |
| Gucy1a3        | 0.016652731 | 1.521927595 | up   |
| Prkcbp1        | 0.016670641 | 1.705720425 | down |
| Doc2g          | 0.016683295 | 1.547374487 | up   |
| Glipr2         | 0.016683295 | 1.686236024 | up   |
| Scnm1          | 0.016684104 | 1.854778171 | up   |
| Srd5a3         | 0.01673205  | 2.019578457 | up   |
| Relt           | 0.01673205  | 1.751316428 | up   |
| AA407270       | 0.01673205  | 1.708680868 | up   |
| Ssh3           | 0.016733609 | 1.650605798 | up   |
| Cpne8          | 0.016733609 | 1.792655706 | up   |
| Mylpf          | 0.016768323 | 1.605014205 | up   |
| Rnf144a        | 0.016773403 | 1.957864404 | down |
| LOC382002      | 0.016773403 | 1.553564549 | up   |
| Atp9a          | 0.016777998 | 1.946009755 | up   |
| E130112N23Rik  | 0.016797269 | 1.626826763 | up   |
| Terf2          | 0.016807623 | 4.621348858 | down |
| D130027H15Rik  | 0.016833093 | 1.618040681 | up   |
| 9430088F20Rik  | 0.016833093 | 1.616253495 | up   |
| Tarsl2         | 0.01683775  | 1.814433694 | up   |
| Elac1          | 0.01683775  | 1.687741518 | up   |
| Fat1           | 0.01683775  | 1.527489185 | up   |
| Tilz3c         | 0.01683775  | 1.779049635 | up   |
| Odf4           | 0.016844142 | 1.561619043 | up   |
| 9330177P20Rik  | 0.016844656 | 1.803807378 | up   |
| Il17rc         | 0.016849209 | 1.577741861 | up   |
| AI593442       | 0.016849209 | 1.768951058 | up   |
| Egfr           | 0.016849209 | 1.669088602 | up   |
| Map3k5         | 0.016851207 | 1.551097274 | up   |

|               |             |             |      |
|---------------|-------------|-------------|------|
| B230312L03Rik | 0.016861562 | 1.542481303 | down |
| Nsun5         | 0.016861562 | 1.694179654 | up   |
| Cpsf4l        | 0.016861562 | 1.634483099 | up   |
| Arl4a         | 0.016861562 | 1.618903995 | up   |
| Rgs6          | 0.016863013 | 1.59399128  | up   |
| Cd151         | 0.016887652 | 2.299678087 | up   |
| 4930544G11Rik | 0.016887652 | 1.847041011 | up   |
| Bmp4          | 0.016909976 | 2.180193901 | up   |
| 1190003J15Rik | 0.016909976 | 1.527339935 | up   |
| 6330562C20Rik | 0.016909976 | 1.713461995 | up   |
| 4930403O06Rik | 0.016909976 | 2.34967041  | down |
| Acta2         | 0.016941633 | 2.341049433 | up   |
| 0610031J06Rik | 0.016946133 | 1.553770065 | up   |
| 5430434G16Rik | 0.016946133 | 1.592814326 | down |
| Asah3         | 0.016946133 | 1.565306902 | up   |
| Man1a         | 0.016946133 | 1.514261127 | up   |
| 8430419L09Rik | 0.016946133 | 2.374649286 | up   |
| Tbc1d2b       | 0.016946133 | 2.312612295 | up   |
| Mpdz          | 0.016946133 | 1.739132762 | up   |
| Chrng         | 0.016946133 | 1.60495317  | up   |
| Fhod1         | 0.016946133 | 1.772767901 | up   |
| Hist1h3f      | 0.016946133 | 1.787804365 | down |
| Rrm1          | 0.016946133 | 2.613793373 | down |
| Usp48         | 0.016946133 | 1.625525951 | up   |
| Olfir725      | 0.016946133 | 1.622147203 | up   |
| 1600021P15Rik | 0.016988386 | 1.906464338 | up   |
| 2010100O12Rik | 0.016992521 | 1.561709404 | up   |
| Pfas          | 0.017002273 | 1.503924131 | up   |
| 2310036D04Rik | 0.017002273 | 1.642930627 | up   |
| Fibp          | 0.017004967 | 1.897043705 | up   |
| LOC232606     | 0.017030537 | 2.191022635 | down |
| Ermp1         | 0.017030537 | 1.627520919 | up   |
| Nol3          | 0.01704221  | 1.528957605 | up   |
| Foxj3         | 0.01704221  | 1.540936589 | up   |
| Hoxa4         | 0.017079974 | 1.69625628  | down |
| BC002216      | 0.017079974 | 3.583628893 | up   |
| Zdhhc14       | 0.017080702 | 1.819124103 | up   |
| Mylk          | 0.017088102 | 2.00488019  | up   |
| Rxrg          | 0.017100141 | 1.762061358 | up   |
| Gls2          | 0.017103985 | 1.783101201 | up   |
| Wdr13         | 0.017110249 | 1.66203475  | up   |
| Coro2a        | 0.017116696 | 1.79226923  | up   |
| Siat7b        | 0.017116696 | 2.866936445 | down |
| LOC385952     | 0.017116696 | 1.502984166 | up   |
| Pbrm1         | 0.017116696 | 1.555051923 | down |
| Chd5          | 0.017124495 | 1.799323916 | up   |
| Slmap         | 0.017130984 | 1.559376121 | up   |
| Calr4         | 0.017130984 | 1.616881728 | up   |

|                 |             |             |      |
|-----------------|-------------|-------------|------|
| Tmem54          | 0.017147914 | 1.836074352 | up   |
| Ilvbl           | 0.017151028 | 1.759037256 | up   |
| A430106G13Rik   | 0.017166771 | 1.965897083 | down |
| Acaa2           | 0.017168785 | 2.013747454 | up   |
| Etv1            | 0.017182538 | 1.515308499 | up   |
| Ghr             | 0.017182538 | 2.060193062 | up   |
| Sema6d          | 0.017207995 | 1.892050147 | up   |
| Crmp1           | 0.017221388 | 1.67746222  | down |
| D10Ert610e      | 0.017231699 | 1.93592155  | up   |
| Obrgrp          | 0.017236836 | 1.924490452 | up   |
| P140            | 0.017236836 | 1.722195268 | up   |
| Mst1r           | 0.017239882 | 1.682134748 | up   |
| scl0001487.1_50 | 0.017248849 | 1.911684394 | up   |
| Nrsn2           | 0.017251032 | 1.601861954 | up   |
| Nufip2          | 0.017251032 | 1.586651802 | down |
| Olf982          | 0.01725944  | 1.690323234 | up   |
| A330021D07Rik   | 0.017264539 | 1.56759584  | down |
| 5430432N15Rik   | 0.017272055 | 1.839270115 | up   |
| Pkp4            | 0.017276937 | 1.990332007 | up   |
| Zfp281          | 0.017276937 | 2.413378    | down |
| Pcdhga4         | 0.017283516 | 1.61386168  | up   |
| ORF34           | 0.017299729 | 1.591590524 | up   |
| Slc7a3          | 0.017302141 | 1.533806324 | up   |
| 1700065O13Rik   | 0.017307157 | 1.884607196 | up   |
| Slc9a6          | 0.017308209 | 1.627861142 | up   |
| Plekha7         | 0.017308209 | 1.545806408 | up   |
| Hbp1            | 0.017312452 | 1.762895346 | up   |
| Tyk2            | 0.017318981 | 1.578006864 | up   |
| D130017N08Rik   | 0.017318981 | 1.503252387 | down |
| Tgif1           | 0.017371154 | 1.705920577 | up   |
| Plek            | 0.017371154 | 3.714321613 | down |
| 5830415F09Rik   | 0.017371154 | 1.678330898 | up   |
| Tle6            | 0.017371154 | 1.832705855 | up   |
| LOC381134       | 0.017374128 | 1.74949038  | up   |
| Pcdh10          | 0.017374128 | 2.201182365 | up   |
| Sort1           | 0.017386068 | 1.556075573 | up   |
| Tbxa2r          | 0.017386563 | 1.70928371  | up   |
| Nxph4           | 0.017419066 | 2.202250958 | down |
| Thbs3           | 0.017426914 | 1.538815856 | up   |
| Avil            | 0.017441306 | 1.523539305 | up   |
| Slc39a7         | 0.017477715 | 1.568816781 | up   |
| Lifr            | 0.017486943 | 1.614066362 | up   |
| Nup37           | 0.017507335 | 1.745683432 | up   |
| Neu2            | 0.017507335 | 1.667151451 | up   |
| Thy1            | 0.017507335 | 1.66460228  | up   |
| Oprs1           | 0.017507335 | 1.626602054 | up   |
| Nfrkb           | 0.017507335 | 1.554434538 | up   |
| Rffl            | 0.017507335 | 1.590759277 | up   |

|               |             |             |      |
|---------------|-------------|-------------|------|
| Hpcal1        | 0.017516965 | 1.623110533 | up   |
| Col4a5        | 0.017525455 | 1.772486687 | up   |
| C2cd2l        | 0.017536944 | 1.941580057 | down |
| Rad23b        | 0.01754104  | 1.756997824 | down |
| Mtfmt         | 0.017565804 | 1.533189416 | up   |
| Slc14a1       | 0.017571062 | 1.913003087 | up   |
| LOC383873     | 0.017584661 | 1.695057988 | up   |
| G630007B09Rik | 0.017584661 | 1.543118596 | up   |
| LOC386094     | 0.017588949 | 2.268827438 | down |
| Pnmal1        | 0.017588949 | 1.550006747 | up   |
| Mcf2l         | 0.017598696 | 1.55270195  | up   |
| 1700087I21Rik | 0.017602705 | 1.600924373 | up   |
| A930002I21Rik | 0.017610809 | 1.626118541 | up   |
| Marcksl1      | 0.017610809 | 1.63034296  | down |
| 2010111I01Rik | 0.017610809 | 1.647946477 | up   |
| Cpxm1         | 0.017610809 | 2.043609619 | up   |
| Inha          | 0.017610809 | 1.801936984 | up   |
| Clca3         | 0.017617293 | 1.826119542 | up   |
| Mina          | 0.017636214 | 1.515146375 | up   |
| LOC385583     | 0.017644007 | 1.588102102 | up   |
| Icam2         | 0.017661203 | 2.001645088 | up   |
| Zc3h14        | 0.017703872 | 1.662815332 | up   |
| Sh2d3c        | 0.017708598 | 1.79164958  | down |
| 6030470M02Rik | 0.017719222 | 3.118816376 | down |
| Nedd4         | 0.017721515 | 1.531288147 | up   |
| Pacsin3       | 0.017725209 | 1.818226814 | up   |
| Kcnab1        | 0.017725209 | 1.682526231 | up   |
| Mbnl          | 0.017725209 | 1.739828706 | up   |
| Ephb6         | 0.017725209 | 1.591968179 | up   |
| Mppe1         | 0.017725209 | 1.542050719 | up   |
| Anks6         | 0.017736709 | 1.587164044 | up   |
| Stfa1         | 0.01774041  | 1.737041831 | up   |
| 2610507B11Rik | 0.01774041  | 1.554041505 | up   |
| 1200009I06Rik | 0.01774041  | 1.580189824 | up   |
| Vgll3         | 0.017746802 | 1.692026377 | up   |
| Slc20a2       | 0.017746802 | 1.564995647 | up   |
| Mrgpra2       | 0.017746802 | 1.640662432 | up   |
| A830054H12Rik | 0.017746802 | 1.759100437 | up   |
| Cmya5         | 0.017746802 | 1.676169157 | up   |
| Ppt1          | 0.017748324 | 1.9413445   | up   |
| Plxna4        | 0.017756783 | 6.065916538 | down |
| Seh1l         | 0.017774912 | 1.68353653  | up   |
| Slc35b1       | 0.017793    | 2.897785187 | down |
| Col6a1        | 0.017793    | 1.927818418 | up   |
| Fgfr1op2      | 0.017793    | 6.043513298 | down |
| Mtmr11        | 0.017807081 | 1.623983622 | up   |
| Nrn1l         | 0.017817088 | 1.598055244 | up   |
| Kif26a        | 0.01782793  | 1.76064384  | up   |

|               |             |             |      |
|---------------|-------------|-------------|------|
| LOC100045542  | 0.01783796  | 2.050422192 | up   |
| A130090K04Rik | 0.017841084 | 1.515704513 | up   |
| Klk7          | 0.017859813 | 1.512227535 | up   |
| Csnk1g1       | 0.017885832 | 2.190920591 | down |
| 4930432K21Rik | 0.017887132 | 1.884579778 | up   |
| Epb4.1l4b     | 0.017916821 | 1.772772312 | up   |
| 6430573H23Rik | 0.017917058 | 1.621554613 | down |
| Sh3md4        | 0.017917069 | 1.545723915 | up   |
| Lonrf2        | 0.017931627 | 1.935533762 | up   |
| Dlg2          | 0.017931627 | 1.799797654 | up   |
| AV273951      | 0.017931627 | 1.500017166 | up   |
| Slc16a6       | 0.017931627 | 1.603480697 | down |
| Styx          | 0.017931627 | 1.584901691 | down |
| Epb4.1l3      | 0.017931627 | 1.582636118 | up   |
| Snx2          | 0.017940605 | 2.141568184 | up   |
| 1700111D19Rik | 0.017940605 | 1.520380139 | up   |
| Rfc2          | 0.017940605 | 1.726641178 | down |
| Cntnap4       | 0.017940605 | 1.501362324 | up   |
| Spata2L       | 0.017940605 | 1.837315202 | up   |
| Qars          | 0.017944405 | 1.589814186 | up   |
| B230209C24Rik | 0.017953733 | 1.805113912 | up   |
| LOC100038993  | 0.017954553 | 1.915179372 | up   |
| Sema4f        | 0.017957036 | 1.874284148 | up   |
| Galm          | 0.017977804 | 1.981630206 | up   |
| LOC385877     | 0.017987138 | 2.17973733  | down |
| LOC100044411  | 0.017987138 | 1.711489081 | up   |
| 8030404L10Rik | 0.018000597 | 1.597732067 | down |
| 1700080G18Rik | 0.018000597 | 1.53419447  | up   |
| Timeless      | 0.018019052 | 1.771934152 | down |
| Cova1         | 0.018028304 | 1.854526758 | down |
| Larp-pending  | 0.018046448 | 1.56851089  | up   |
| Galnt10       | 0.018046448 | 1.869497895 | up   |
| Ripk4         | 0.018046448 | 2.464329481 | up   |
| Pcp4l1        | 0.018059416 | 2.00957036  | up   |
| 1600017E01Rik | 0.018059416 | 1.624910235 | up   |
| Magi1         | 0.018068826 | 1.938788414 | up   |
| Srpx2         | 0.018068826 | 1.873832703 | up   |
| E030038G15Rik | 0.018068964 | 1.732204914 | down |
| Il17d         | 0.018070715 | 1.535343528 | up   |
| Ube2q1        | 0.018070728 | 1.695650458 | down |
| Mpst          | 0.018101076 | 2.012371302 | up   |
| Mre11a        | 0.018132227 | 1.593019128 | up   |
| Psmb5         | 0.018176934 | 1.981876135 | down |
| Rabif         | 0.018176934 | 2.049121618 | up   |
| Ltb4r1        | 0.018199939 | 1.560956717 | up   |
| Tmem111       | 0.018227374 | 1.872704864 | up   |
| Bcl11b        | 0.018227447 | 1.740461111 | down |
| Arl2bp        | 0.018232346 | 1.997327089 | up   |



|               |             |             |      |
|---------------|-------------|-------------|------|
| Foxp2         | 0.018240303 | 1.948508143 | up   |
| Gad1          | 0.018246351 | 4.026839256 | down |
| Prss36        | 0.018246351 | 1.539316893 | up   |
| Cd97          | 0.018246351 | 1.944955826 | up   |
| LOC666676     | 0.018255321 | 1.783014298 | up   |
| Mrc2          | 0.018262032 | 1.662971735 | up   |
| Tnrc6c        | 0.018262032 | 1.673379421 | down |
| 4930515G13Rik | 0.018262032 | 1.834805727 | up   |
| D11Wsu99e     | 0.018272938 | 1.643987894 | up   |
| Slmap         | 0.018280786 | 2.184310198 | up   |
| Cnksr3        | 0.018285697 | 1.523344159 | up   |
| Dncl2a        | 0.018285697 | 1.727690816 | down |
| Luc7l         | 0.018285697 | 1.792991281 | up   |
| LOC674997     | 0.018285697 | 1.743226409 | up   |
| 1700106J16Rik | 0.018299839 | 1.589351893 | up   |
| Pkp1          | 0.018305644 | 2.543884277 | up   |
| Stx18         | 0.018307459 | 1.50829339  | up   |
| Scml2         | 0.018307459 | 1.662477732 | up   |
| Nfatc1        | 0.01830828  | 2.385699749 | up   |
| Ripk4         | 0.018316345 | 1.717285276 | up   |
| Apobec3       | 0.018316345 | 1.546275139 | up   |
| EG626367      | 0.018316345 | 1.793059588 | down |
| Akr1b8        | 0.018321302 | 1.755342364 | up   |
| Angptl2       | 0.018321302 | 1.627439618 | up   |
| Kcnk2         | 0.018326594 | 1.952589035 | down |
| Pds5a         | 0.018326594 | 1.643751979 | up   |
| Laptm4a       | 0.018326594 | 2.131327391 | up   |
| Morn2         | 0.018355195 | 1.85149312  | down |
| Uaca          | 0.018355195 | 1.759548187 | up   |
| Actn2         | 0.018408369 | 1.730874062 | up   |
| Cpeb4         | 0.018409768 | 2.556651115 | down |
| Pak1ip1       | 0.018409768 | 1.760069728 | down |
| Lasp1         | 0.018409768 | 1.632334471 | up   |
| 4930565B19Rik | 0.018412946 | 1.743886113 | up   |
| Hspa4l        | 0.018440392 | 1.973282814 | down |
| Ctsc          | 0.018440392 | 1.798335791 | up   |
| Foxred1       | 0.018454129 | 1.520336628 | up   |
| Kif20b        | 0.018462252 | 3.039420605 | down |
| LOC100043257  | 0.018473985 | 2.056152582 | up   |
| Slc7a7        | 0.018473985 | 1.505616546 | up   |
| 9430077D24Rik | 0.01848428  | 1.6399194   | up   |
| Eln           | 0.018489299 | 2.773694277 | up   |
| 382044        | 0.018501489 | 1.546400785 | up   |
| LOC333405     | 0.018515199 | 1.749730349 | up   |
| Epyc          | 0.018515514 | 2.602643728 | down |
| Col22a1       | 0.01851595  | 1.713129163 | up   |
| Stx17         | 0.01851595  | 1.600913525 | up   |
| Cartpt        | 0.018528407 | 1.640872955 | up   |

|               |             |             |      |
|---------------|-------------|-------------|------|
| Asph          | 0.018531429 | 1.620009184 | up   |
| LOC386246     | 0.018531429 | 2.770797968 | down |
| Ube2j2        | 0.018544886 | 1.550761223 | up   |
| Ftsj          | 0.018544886 | 1.537119865 | up   |
| Ift81         | 0.018546728 | 1.550028563 | up   |
| LOC269919     | 0.01855175  | 1.501199484 | up   |
| Cntnap4       | 0.018580405 | 1.730726719 | up   |
| Prmt2         | 0.018592948 | 1.630178094 | up   |
| 8030453O22Rik | 0.018596754 | 1.599879384 | up   |
| Irak4         | 0.018605145 | 1.560069084 | up   |
| Pxn           | 0.018605145 | 1.657881379 | up   |
| 1200014J11Rik | 0.018605145 | 1.666870475 | up   |
| Spag5         | 0.018605145 | 1.768015385 | down |
| Prkcdbp       | 0.018605145 | 1.842539907 | up   |
| Slc30a7       | 0.018605145 | 1.856644154 | up   |
| Rab25         | 0.018605145 | 2.317437649 | up   |
| Rxrb          | 0.018605145 | 1.658181667 | up   |
| Col11a1       | 0.018626818 | 2.961684942 | down |
| Bard1         | 0.018627707 | 1.500862002 | up   |
| Farsb         | 0.018642658 | 1.514271975 | up   |
| Tnip1         | 0.01866921  | 1.568222761 | up   |
| Comtd1        | 0.018673882 | 1.623176098 | up   |
| Wdr4          | 0.018686699 | 1.544607997 | up   |
| Nfkb1         | 0.018686757 | 1.526234984 | up   |
| Pip5k1a       | 0.018687887 | 1.764115572 | down |
| LOC381431     | 0.018710595 | 1.536129952 | up   |
| Trrp2         | 0.018710595 | 1.75210321  | up   |
| Galt          | 0.018763412 | 2.111257792 | up   |
| Csnk2a1       | 0.018772544 | 1.672163248 | up   |
| Bcl11b        | 0.018772544 | 4.278352261 | down |
| Il1rap        | 0.018772544 | 1.638616681 | up   |
| Nsmaf         | 0.018782882 | 1.606626153 | up   |
| 1700065A05Rik | 0.018785477 | 1.742350578 | up   |
| Agtr1a        | 0.018788563 | 1.549103022 | up   |
| Yipf5         | 0.018788563 | 2.609052897 | down |
| Sox2          | 0.018788563 | 4.030270577 | down |
| Ret           | 0.018788563 | 1.627711773 | up   |
| Zc3h14        | 0.018801935 | 2.140615463 | up   |
| Jazf1         | 0.01887276  | 1.949540854 | up   |
| Fes           | 0.018873638 | 1.656446934 | up   |
| Mpzl1         | 0.018873638 | 1.752617836 | up   |
| Znrf2         | 0.018876877 | 1.567787528 | down |
| LOC245305     | 0.018892689 | 1.56282413  | up   |
| 9430015L11Rik | 0.018904449 | 1.698910713 | up   |
| LOC100047675  | 0.018904449 | 1.861332536 | up   |
| Vps39         | 0.018904449 | 1.600494981 | up   |
| Slc25a45      | 0.01890545  | 1.86148417  | up   |
| Gstcd         | 0.018916216 | 2.100327969 | up   |

|               |             |             |      |
|---------------|-------------|-------------|------|
| Smox          | 0.018921141 | 1.809186101 | up   |
| Invs          | 0.018946121 | 1.556851029 | up   |
| 2610035D17Rik | 0.018946121 | 1.550805688 | down |
| 9530068E07Rik | 0.018946121 | 1.569489718 | up   |
| Ptcd2         | 0.018947847 | 1.771337509 | up   |
| Hbp1          | 0.018949969 | 1.848447442 | up   |
| Ptgfrn        | 0.018949969 | 1.705863476 | up   |
| Kctd5         | 0.018949969 | 1.717784882 | up   |
| Ctdspl2       | 0.018949969 | 1.746198177 | up   |
| Olfr100       | 0.01895364  | 1.598871589 | up   |
| Acan          | 0.018957976 | 2.910867214 | down |
| Thbs2         | 0.018977318 | 2.531825304 | up   |
| Bahcc1        | 0.019014407 | 1.869986296 | up   |
| 2310047M10Rik | 0.019018065 | 1.690625787 | up   |
| Ccdc93        | 0.019018065 | 1.533792257 | up   |
| Taok1         | 0.019022422 | 1.614958406 | down |
| 5830405N20Rik | 0.019022422 | 1.6229105   | up   |
| Fus           | 0.019024855 | 1.859306812 | up   |
| Zfp526        | 0.019028571 | 1.63176477  | up   |
| Nfkbia        | 0.019037595 | 1.601578713 | up   |
| Slc4a8        | 0.019045835 | 1.590860844 | up   |
| 1700016J18Rik | 0.019046893 | 1.521749139 | up   |
| Golga7        | 0.019047411 | 1.911085486 | up   |
| Apobec1       | 0.019047411 | 1.563542962 | up   |
| 4833408A19Rik | 0.019057207 | 1.689747334 | up   |
| LOC545208     | 0.019057207 | 1.587709785 | up   |
| Tyms          | 0.01906701  | 1.540188313 | up   |
| Hs3st1        | 0.01909117  | 1.711952686 | up   |
| Prkcbp1       | 0.01909117  | 1.601651907 | down |
| A430073A17Rik | 0.01909117  | 1.539066434 | up   |
| Ankmy2        | 0.01909117  | 1.569953919 | down |
| Ece1          | 0.019136557 | 2.07595396  | up   |
| LOC100044699  | 0.019136557 | 1.665133715 | up   |
| LOC100039728  | 0.019150907 | 1.566990852 | up   |
| Gigyf1        | 0.019152992 | 1.500017285 | down |
| 1110012D08Rik | 0.019152992 | 1.915297866 | up   |
| 6130401L20Rik | 0.019152992 | 1.591998339 | up   |
| 1700027N10Rik | 0.019152992 | 1.521033526 | up   |
| Cdk2          | 0.019152992 | 1.665256023 | up   |
| Nr1h3         | 0.019153344 | 1.587687135 | up   |
| Tnfsf13b      | 0.019168587 | 1.764905214 | up   |
| Notch4        | 0.019172888 | 2.045795679 | up   |
| Zmpste24      | 0.019172888 | 1.803760052 | up   |
| 4930546H06Rik | 0.019172888 | 1.604742765 | up   |
| Arsg          | 0.019187808 | 1.923086882 | up   |
| 6430548M08Rik | 0.019187808 | 1.660259128 | down |
| Acad10        | 0.019215489 | 1.611324072 | up   |
| Tlcd2         | 0.019223901 | 1.53439188  | up   |

|               |             |             |      |
|---------------|-------------|-------------|------|
| Kifc2         | 0.019241247 | 1.704722166 | up   |
| Tpd52         | 0.019248843 | 1.818713784 | up   |
| C8g           | 0.019248843 | 1.574211359 | up   |
| 6330416L11Rik | 0.019265076 | 2.140543938 | up   |
| Gnpat         | 0.019265076 | 1.632168293 | up   |
| Zfp750        | 0.019272536 | 1.831043005 | up   |
| 0610007P14Rik | 0.019272536 | 1.584949851 | up   |
| A830081I21Rik | 0.01931783  | 1.559014678 | up   |
| MacroD2       | 0.019318473 | 1.506709218 | up   |
| Phtf1         | 0.019337624 | 1.58409822  | up   |
| LOC386330     | 0.019364636 | 5.670508385 | down |
| Cln3          | 0.019365735 | 1.785495997 | up   |
| Asb4          | 0.019371817 | 5.664105892 | down |
| Slc27a4       | 0.019380923 | 1.590130091 | up   |
| Tmco4         | 0.019380923 | 1.670428515 | up   |
| Fbxl12        | 0.019390566 | 1.704402566 | up   |
| C230091E20Rik | 0.01941031  | 1.540088534 | down |
| Manba         | 0.019445384 | 1.523487091 | up   |
| Lpcat2        | 0.019452056 | 1.648693323 | up   |
| Pard3         | 0.019468626 | 1.587090254 | up   |
| 6430578G21Rik | 0.019495532 | 1.536979079 | down |
| Tekt1         | 0.019516265 | 1.640228748 | up   |
| 6430537F04    | 0.019517733 | 1.56843245  | up   |
| D530033A12Rik | 0.019517733 | 1.686513901 | up   |
| 1700025H01Rik | 0.019517733 | 1.664431453 | up   |
| D330027H18Rik | 0.019530708 | 1.723230958 | down |
| Pter          | 0.019530708 | 1.612497807 | up   |
| Zfp641        | 0.019539241 | 1.799044251 | up   |
| LOC329506     | 0.019539241 | 2.016060829 | up   |
| Cuta          | 0.019545576 | 1.827519774 | up   |
| Galntl2       | 0.019545576 | 1.778004289 | up   |
| 4930402H24Rik | 0.019545576 | 1.629089117 | down |
| Gtf3c5        | 0.019545576 | 1.655191898 | up   |
| Rnf8          | 0.019545576 | 1.738879561 | up   |
| Mbd3l2        | 0.019545576 | 1.880525589 | up   |
| Eef1b2        | 0.019545576 | 1.817223549 | up   |
| D030070I18Rik | 0.019566519 | 1.534617543 | up   |
| Myo9b         | 0.019566519 | 2.033993959 | up   |
| Olfml2a       | 0.019579794 | 1.589794517 | up   |
| Hsd17b11      | 0.019579794 | 1.58490479  | up   |
| Masp2         | 0.019601461 | 1.59989953  | up   |
| Dst           | 0.019620908 | 1.986138701 | up   |
| C920027I18Rik | 0.019621775 | 1.936953425 | down |
| LOC100045678  | 0.019641917 | 1.620488524 | down |
| Egfr          | 0.019685267 | 1.636463761 | up   |
| 2810405K07Rik | 0.019685267 | 2.502218962 | down |
| C630016N16Rik | 0.019705122 | 1.573440433 | up   |
| 0610012D14Rik | 0.019705122 | 1.600484848 | up   |

|                |             |             |      |
|----------------|-------------|-------------|------|
| 1700047117Rik1 | 0.019709148 | 1.913920283 | up   |
| Pbbp           | 0.019769434 | 3.933816433 | down |
| LOC624662      | 0.019769434 | 1.875378609 | up   |
| Csf2ra         | 0.019769434 | 1.566088319 | up   |
| Gsta4          | 0.019791061 | 2.21587038  | up   |
| Neu3           | 0.019808099 | 1.607979894 | up   |
| Lpcat4         | 0.019814968 | 1.509519458 | up   |
| 4632411B12Rik  | 0.01981649  | 1.805941463 | up   |
| Srpk2          | 0.01981649  | 1.759709477 | up   |
| R74862         | 0.01985397  | 1.972116828 | up   |
| 6330406I15Rik  | 0.019856818 | 1.697691321 | up   |
| D030067L12Rik  | 0.019880369 | 1.68990016  | down |
| Mobkl2c        | 0.019887889 | 1.5072577   | up   |
| Bcl2l11        | 0.019895401 | 2.099246025 | up   |
| 6030408B16Rik  | 0.019902388 | 1.747760296 | up   |
| Smek2          | 0.019910645 | 3.201736927 | down |
| Depdc5         | 0.019922899 | 1.676931262 | up   |
| Adcy3          | 0.019945916 | 1.940603852 | up   |
| Rab38          | 0.019945916 | 1.532924414 | up   |
| Otud7b         | 0.019945916 | 1.671985984 | up   |
| Cxcl16         | 0.019946849 | 1.745026112 | up   |
| Ppm1f          | 0.019952619 | 1.617442846 | up   |
| Msn            | 0.019952619 | 1.935514569 | up   |
| Ythdc2         | 0.019952619 | 1.631167531 | up   |
| Ttll4          | 0.019952619 | 1.584427357 | up   |
| Mef2c          | 0.019952619 | 1.64749217  | down |
| Polr3d         | 0.019965924 | 1.57905829  | up   |
| Rhob           | 0.019981235 | 2.576362133 | down |
| Gulp1          | 0.019981235 | 1.82683444  | up   |
| Mvp            | 0.019993104 | 1.699517965 | up   |
| Zc3h12a        | 0.019996004 | 1.607051253 | up   |
| Hexim2         | 0.019996004 | 1.728829384 | up   |
| Car15          | 0.019996004 | 1.514352918 | up   |
| Ube2i          | 0.019996004 | 1.527671099 | up   |
| LOC380854      | 0.019996004 | 1.524170518 | down |
| Nadsyn1        | 0.019996004 | 1.636990905 | up   |
| Ptprm          | 0.020007389 | 1.672431231 | up   |
| Sertad3        | 0.02002774  | 2.51334405  | up   |
| Crk            | 0.02002774  | 1.567750692 | up   |
| Plekhg2        | 0.02002774  | 1.619399309 | up   |
| Pknox2         | 0.02002774  | 2.066895723 | down |
| Txnip          | 0.020034289 | 2.000159264 | up   |
| Rapgef5        | 0.020037541 | 1.586317897 | down |
| Prdx2          | 0.020037541 | 2.441828966 | down |
| Ifnar2         | 0.020052493 | 1.557979584 | up   |
| 2900056M07Rik  | 0.020052493 | 1.669989467 | down |
| Rgs11          | 0.020052493 | 1.60239768  | up   |
| Cabyr          | 0.020067066 | 1.641574979 | up   |

|               |             |             |      |
|---------------|-------------|-------------|------|
| Fbxl11        | 0.020067066 | 1.554006815 | down |
| LOC385822     | 0.020067066 | 1.643773794 | up   |
| Mdga2         | 0.020067066 | 1.596553206 | down |
| Slc46a3       | 0.020067066 | 1.502277136 | up   |
| Rad51l3       | 0.020102821 | 1.593988299 | up   |
| Col18a1       | 0.020129181 | 2.608283281 | up   |
| 2700062C07Rik | 0.020129181 | 1.990626335 | up   |
| Dock6         | 0.020129181 | 1.790713787 | up   |
| 1700082G03Rik | 0.020169903 | 1.814059138 | up   |
| Pcmt1         | 0.020174058 | 2.676912308 | down |
| Trpm6         | 0.020175999 | 1.524550438 | up   |
| Plcz1         | 0.020176793 | 1.522794366 | up   |
| St6galnac6    | 0.020198923 | 1.534910202 | up   |
| Nup88         | 0.020206871 | 1.874432564 | up   |
| Zfp212        | 0.020231422 | 1.533407688 | up   |
| Dnahc11       | 0.020231422 | 1.538279057 | up   |
| Ildr1         | 0.020249326 | 1.650166154 | up   |
| Nr5a2         | 0.020249326 | 1.584414005 | up   |
| Eefsec        | 0.020251149 | 1.600026965 | up   |
| Phka2         | 0.020254023 | 1.675261259 | up   |
| Cpsf3         | 0.020283788 | 2.64977026  | down |
| Khdrbs3       | 0.020312212 | 1.813898087 | up   |
| Mis12         | 0.02032567  | 2.050075293 | down |
| Aof1          | 0.020327551 | 1.623465657 | up   |
| 5730409G15Rik | 0.020331061 | 1.540131569 | up   |
| Stard13       | 0.020331061 | 1.853927612 | up   |
| Cdk2          | 0.020349132 | 1.997962952 | up   |
| A530079D03Rik | 0.020370152 | 1.503989816 | up   |
| Ankrd27       | 0.020374037 | 1.578647733 | up   |
| H2-Ab1        | 0.020376839 | 1.633212209 | up   |
| Xrcc6         | 0.020376839 | 1.554399371 | up   |
| Dusp11        | 0.020384604 | 1.866850615 | up   |
| Slc11a2       | 0.020393895 | 1.672279    | up   |
| 2210010N04Rik | 0.020393895 | 1.621187687 | up   |
| Kbtbd7        | 0.020399446 | 1.873059869 | up   |
| Aipl1         | 0.020400038 | 1.658350945 | up   |
| Rab11fip3     | 0.020411616 | 1.526675224 | up   |
| Cyp4f13       | 0.020411616 | 1.668002963 | up   |
| BC006965      | 0.020411616 | 1.501077652 | up   |
| Cobll1        | 0.020426372 | 1.781957388 | up   |
| Ppl           | 0.020426372 | 2.220977068 | up   |
| Arhgdig       | 0.020427963 | 1.735333562 | up   |
| 3230401L03Rik | 0.020427963 | 1.623861074 | down |
| Scn8a         | 0.020427963 | 1.608902454 | up   |
| 3110079O15Rik | 0.020427963 | 5.158185005 | down |
| Atp2c1        | 0.020427963 | 1.673639298 | up   |
| Micall2       | 0.020436537 | 1.729387164 | up   |
| Chchd3        | 0.02044363  | 1.594190598 | up   |

|                 |             |             |      |
|-----------------|-------------|-------------|------|
| Dnaja2          | 0.020455549 | 1.651825547 | up   |
| Pou4f2          | 0.020455549 | 1.656441689 | up   |
| Il3ra           | 0.020464836 | 1.611567378 | up   |
| 9330104G04Rik   | 0.020467071 | 1.573187232 | up   |
| Vegfb           | 0.020493534 | 1.550295949 | up   |
| LOC386205       | 0.020509731 | 1.727622628 | up   |
| Rad51           | 0.020515097 | 1.847840071 | up   |
| Galntl4         | 0.020522121 | 1.817670822 | up   |
| Ndfip1          | 0.020522121 | 1.962070584 | up   |
| Tbx2            | 0.020522421 | 1.751884937 | up   |
| Ggt7            | 0.020527292 | 1.516577125 | up   |
| 2810453I06Rik   | 0.020531317 | 1.689994812 | up   |
| Amhr2           | 0.020533517 | 1.585989475 | up   |
| Slc11a1         | 0.0205436   | 2.14029789  | down |
| Ei24            | 0.0205436   | 1.6140939   | up   |
| Cdh3            | 0.0205436   | 1.704200745 | up   |
| Rnf8            | 0.020556936 | 1.532548547 | up   |
| B830045N13Rik   | 0.020556936 | 1.912617445 | up   |
| Dok5            | 0.020584293 | 1.709348679 | up   |
| 2300006M17Rik   | 0.020584293 | 1.811195493 | down |
| Krt5            | 0.020586362 | 2.158652544 | up   |
| Gm609           | 0.020616418 | 1.836810947 | up   |
| Edem1           | 0.020622162 | 1.60655725  | up   |
| Lep             | 0.020626465 | 1.846356869 | up   |
| 1520402A20Rik   | 0.020641664 | 1.55072844  | up   |
| Il6ra           | 0.020655325 | 1.864237309 | up   |
| Ric8b           | 0.020671457 | 2.12016654  | down |
| LOC380986       | 0.020687413 | 1.566044927 | up   |
| Chic2           | 0.020693155 | 1.564494252 | up   |
| scl0002050.1_27 | 0.020716788 | 1.552209616 | up   |
| Wdr90           | 0.02071951  | 1.675659537 | down |
| Gnpda1          | 0.020736147 | 1.529057264 | up   |
| LOC382555       | 0.020763814 | 6.83583355  | down |
| Actr1a          | 0.020770241 | 1.69549489  | up   |
| Mkrn1           | 0.020776117 | 1.732840061 | down |
| Tm2d3           | 0.020779649 | 1.517449737 | up   |
| BC006779        | 0.020783709 | 1.524500847 | up   |
| Plch2           | 0.020783709 | 1.546811104 | up   |
| Klf6            | 0.020783709 | 1.616447687 | down |
| Pdpk1           | 0.020805543 | 1.717574596 | down |
| Pik3ca          | 0.020807648 | 2.848953486 | down |
| C85492          | 0.020814469 | 1.771116018 | up   |
| Pigs            | 0.020817675 | 1.539017439 | up   |
| Tmem132e        | 0.020818476 | 2.019565582 | up   |
| Stmn4           | 0.020818476 | 2.048155069 | up   |
| Zfp288          | 0.020850908 | 1.895069122 | down |
| Il4i1           | 0.020853834 | 1.516913533 | up   |
| Ramp1           | 0.020853834 | 1.611636877 | up   |

|               |             |             |      |
|---------------|-------------|-------------|------|
| B3galt4       | 0.020861516 | 1.649116874 | up   |
| EG432681      | 0.020861516 | 1.558766246 | down |
| 6720480F11Rik | 0.020887401 | 1.501701117 | down |
| 3110001P07Rik | 0.020889109 | 1.538215756 | down |
| Ggta1         | 0.020943923 | 1.651818872 | up   |
| Dazap1        | 0.020950966 | 1.567214131 | up   |
| Aldh1a2       | 0.020951601 | 1.605857968 | up   |
| Fabp7         | 0.020987548 | 5.064826012 | down |
| Lbxcor1       | 0.020987548 | 1.517209172 | down |
| Rbms2         | 0.020987548 | 1.594272733 | up   |
| Ttc19         | 0.02099626  | 1.550361991 | up   |
| St5           | 0.02099688  | 1.537122846 | up   |
| Slc37a4       | 0.021032162 | 1.787099719 | down |
| Syng1         | 0.021064593 | 1.836171627 | up   |
| Hs2st1        | 0.021065243 | 1.738355517 | up   |
| Ctnnd2        | 0.021099117 | 1.884401202 | up   |
| Mylk          | 0.021102142 | 1.819881797 | up   |
| Nab1          | 0.021140594 | 1.537516475 | up   |
| Epb4.1        | 0.021140594 | 1.884973764 | down |
| mKIAA1090     | 0.021140594 | 1.57806778  | up   |
| St6galnac3    | 0.021146337 | 1.525290251 | up   |
| D830030K20Rik | 0.021148397 | 1.529114246 | up   |
| Gstk1         | 0.021153895 | 1.935761571 | up   |
| C430049K18Rik | 0.021179311 | 1.532276034 | up   |
| Rxfp3         | 0.021179311 | 1.524842739 | up   |
| Smad3         | 0.021179311 | 1.546805143 | up   |
| Stoml2        | 0.021179311 | 1.661239624 | up   |
| Lima1         | 0.021179311 | 1.978877544 | down |
| Greb1         | 0.021179311 | 1.583178043 | up   |
| E330034L11Rik | 0.021179311 | 1.558530211 | up   |
| Flot1         | 0.021179311 | 1.589307427 | up   |
| Sirt4         | 0.021179311 | 2.099212885 | down |
| Mylk          | 0.021179311 | 1.5818367   | up   |
| Ccl25         | 0.021179311 | 1.951863527 | down |
| Sil1          | 0.021211697 | 1.600662828 | up   |
| Nme7          | 0.021215862 | 1.547311306 | down |
| Car2          | 0.021216676 | 1.550095081 | up   |
| D4Ert681e     | 0.021239903 | 2.287807465 | down |
| Cdkn1b        | 0.021243591 | 1.570105076 | down |
| Gdf1          | 0.021243591 | 1.551178575 | up   |
| Thsd2         | 0.021243591 | 1.529016018 | up   |
| Abca15        | 0.021246577 | 1.542894125 | up   |
| Slc26a6       | 0.021246577 | 1.767056584 | up   |
| Ank3          | 0.021250289 | 2.969679833 | down |
| Gsc           | 0.021276303 | 2.027689219 | up   |
| Gpsm3         | 0.021276303 | 1.547520876 | up   |
| BC068157      | 0.021279801 | 3.287061453 | down |
| C78339        | 0.021303391 | 1.605430007 | up   |



|               |             |             |      |
|---------------|-------------|-------------|------|
| Wrn           | 0.021303391 | 1.769755602 | up   |
| Fstl5         | 0.021303391 | 4.335448742 | down |
| Tmprss5       | 0.021310216 | 1.589292526 | up   |
| Idb2          | 0.021319006 | 1.550766587 | down |
| Prkcdbp       | 0.02133303  | 1.972087622 | up   |
| Lefty1        | 0.021346349 | 1.564576626 | up   |
| Cobll1        | 0.021372603 | 1.749427795 | up   |
| Tlk2          | 0.021372603 | 1.80414927  | down |
| Ndel1         | 0.021419523 | 1.547183991 | up   |
| Plcg2         | 0.021480626 | 1.661407828 | up   |
| Brd3          | 0.021528855 | 2.717964172 | down |
| D130046C19Rik | 0.021528855 | 2.021287203 | up   |
| Tmem132c      | 0.021528855 | 1.72615552  | up   |
| Hsf2          | 0.021535965 | 1.519537687 | down |
| Rnaset2b      | 0.021549933 | 1.563409925 | up   |
| Cryab         | 0.021555008 | 1.600483537 | up   |
| Rbms2         | 0.02155583  | 1.65386641  | up   |
| LOC384887     | 0.02155583  | 1.537421346 | up   |
| Echdc2        | 0.021560969 | 1.587525249 | up   |
| Srd5a3        | 0.021561157 | 1.662363052 | up   |
| Pi4k2b        | 0.021573726 | 1.681227088 | up   |
| Gm1587        | 0.021574479 | 1.520992518 | up   |
| Mnat1         | 0.021574479 | 1.602127791 | up   |
| Ccdc3         | 0.021598799 | 2.054102659 | up   |
| C530008M17Rik | 0.021598799 | 3.264620781 | down |
| Efr3a         | 0.021598799 | 2.16063714  | up   |
| Prim2         | 0.021627683 | 1.696676493 | up   |
| Ntrk3         | 0.021638358 | 1.626795888 | down |
| Auh           | 0.021639856 | 1.594566107 | up   |
| D830014E11Rik | 0.021639856 | 1.508249283 | up   |
| Prkd2         | 0.021656668 | 1.667649865 | up   |
| Trip6         | 0.02166483  | 1.731377482 | up   |
| Mfsd3         | 0.02166483  | 1.551036835 | up   |
| Ptrh1         | 0.021680325 | 1.55980444  | up   |
| D330050I23Rik | 0.021680325 | 1.676500797 | down |
| Mtss1         | 0.021691643 | 1.642255783 | up   |
| Lrmp          | 0.021697888 | 1.515024781 | up   |
| Rab11fip2     | 0.021702031 | 1.938655257 | up   |
| D030005B14Rik | 0.021740791 | 1.505499363 | up   |
| Nek1          | 0.021740791 | 1.817376852 | up   |
| Inadl         | 0.021740791 | 1.53197968  | up   |
| A1428936      | 0.021740791 | 1.596413255 | up   |
| Sos2          | 0.021740791 | 2.000430107 | down |
| Col24a1       | 0.021790117 | 1.610278606 | up   |
| BC021919      | 0.021808773 | 1.54728508  | up   |
| A230050P20Rik | 0.021813124 | 1.5283072   | up   |
| Tes           | 0.021813562 | 1.631334186 | up   |
| Pogz          | 0.021814093 | 2.138189554 | up   |

|                 |             |             |      |
|-----------------|-------------|-------------|------|
| Jam2            | 0.021819953 | 2.400185823 | down |
| Bcl11a          | 0.021835379 | 2.041830063 | down |
| Myo5b           | 0.021845812 | 1.77299726  | up   |
| Rimbp2          | 0.021845812 | 1.59570837  | up   |
| Trip10          | 0.021872154 | 1.618603349 | up   |
| Vps35           | 0.02188685  | 1.514089108 | up   |
| Egln1           | 0.021903884 | 1.659017444 | up   |
| Gja5            | 0.021903884 | 2.117199421 | up   |
| Cacna2d3        | 0.021903884 | 1.594289899 | up   |
| Mical1          | 0.021946779 | 1.595190167 | up   |
| Nfatc1          | 0.021946779 | 2.159632921 | up   |
| Dhx9            | 0.021946779 | 1.600957274 | up   |
| Pex10           | 0.021946779 | 1.834176183 | up   |
| Susd2           | 0.021958865 | 1.653440595 | up   |
| Eef1e1          | 0.021958865 | 1.677147627 | down |
| Rab26           | 0.02196043  | 1.932594061 | up   |
| D230005E09Rik   | 0.021976218 | 1.941574216 | down |
| scl0004010.1_24 | 0.021976218 | 1.581531048 | up   |
| LOC100048332    | 0.021976218 | 1.680161595 | up   |
| 2310036I02Rik   | 0.021983109 | 1.648163676 | up   |
| Mpv17           | 0.021984389 | 1.551789999 | up   |
| Narg1           | 0.021984389 | 1.971160889 | down |
| Actg2           | 0.021996483 | 2.055608511 | up   |
| Mscp            | 0.021996483 | 1.649073839 | up   |
| Cdh8            | 0.02201118  | 1.718152165 | up   |
| E130114P18Rik   | 0.022015598 | 3.115866661 | down |
| Wfdc10          | 0.022038236 | 1.570064902 | up   |
| Ccdc71          | 0.022038912 | 1.612516642 | up   |
| Mllt4           | 0.022042671 | 1.815965772 | down |
| 2310046M24Rik   | 0.022045812 | 1.55982244  | up   |
| Prmt5           | 0.022112366 | 1.651705265 | up   |
| Pip4k2b         | 0.02212848  | 1.613613844 | up   |
| LOC626309       | 0.022130856 | 2.09135747  | up   |
| Asb2            | 0.022133796 | 1.587048531 | up   |
| LOC675567       | 0.022161042 | 1.589429736 | up   |
| 3110004L20Rik   | 0.022191562 | 1.882207155 | up   |
| Lonrf3          | 0.022203172 | 1.767793417 | up   |
| Rasl11b         | 0.022211712 | 1.523000121 | up   |
| Btrc            | 0.022216052 | 1.599065304 | down |
| Nrn1            | 0.022216052 | 1.510068417 | down |
| Zbtb40          | 0.022224484 | 1.660732865 | up   |
| 1810015C11Rik   | 0.022224484 | 1.775437951 | up   |
| Klc1            | 0.022231374 | 1.524459362 | down |
| 5730593F17Rik   | 0.022231374 | 1.600599647 | up   |
| Sec63           | 0.022246111 | 1.722755909 | down |
| Zfp62           | 0.022246111 | 1.545906782 | down |
| LOC384842       | 0.022253875 | 1.75547874  | up   |
| Npy             | 0.022259386 | 1.670900345 | up   |

|               |             |             |      |
|---------------|-------------|-------------|------|
| Spast         | 0.022271477 | 2.048665524 | down |
| Gusb          | 0.022280375 | 1.816432238 | up   |
| Tirap         | 0.022286011 | 1.842573404 | up   |
| P2ry13        | 0.022287119 | 1.505988598 | up   |
| Dnajb11       | 0.02229788  | 1.507345796 | down |
| Ajap1         | 0.022307318 | 1.863787413 | up   |
| LOC100047670  | 0.022312582 | 1.604246497 | up   |
| Lias          | 0.022312582 | 3.216734886 | down |
| Limk2         | 0.022323865 | 1.603653193 | up   |
| Fblim1        | 0.022333605 | 2.173412561 | up   |
| Accn3         | 0.022333907 | 1.655033469 | up   |
| 2400003C14Rik | 0.022334963 | 2.138006926 | up   |
| Zfp365        | 0.022380251 | 1.525925994 | up   |
| Aifm3         | 0.022380251 | 1.57817471  | up   |
| Tnrc15        | 0.022380251 | 1.602196813 | up   |
| LOC100044376  | 0.022388142 | 1.593915939 | down |
| Lrrk1         | 0.022388142 | 1.701816559 | up   |
| Becn1         | 0.022399722 | 1.993611932 | up   |
| Dnmbp         | 0.022410052 | 1.64814353  | up   |
| Arl3          | 0.022429289 | 2.178170204 | down |
| Crip3         | 0.022429289 | 1.524590492 | up   |
| Zbtb9         | 0.022432169 | 1.556682229 | up   |
| Ramp3         | 0.022432752 | 1.684131265 | up   |
| D6Wsu176e     | 0.022432752 | 1.580286741 | up   |
| Dek           | 0.022432752 | 6.341698647 | down |
| Scrn1         | 0.022459136 | 1.55444026  | up   |
| 1810022C23Rik | 0.02247211  | 1.533457995 | up   |
| D4Wsu114e     | 0.022479946 | 1.681880117 | down |
| LOC244495     | 0.022480419 | 1.55705142  | up   |
| Ugt1a10       | 0.022528546 | 1.567747712 | up   |
| Mzf1          | 0.022528546 | 1.608070016 | up   |
| Hcfc2         | 0.022528546 | 1.668494701 | down |
| Ttl           | 0.022541963 | 1.659464002 | up   |
| Pik3c3        | 0.022541963 | 1.652829647 | up   |
| Paox          | 0.022582641 | 1.856645346 | up   |
| Tmub1         | 0.022582641 | 1.527398825 | up   |
| Nxph2         | 0.022582641 | 1.577316999 | up   |
| Rnf186        | 0.022582641 | 1.598333716 | up   |
| Ctsh          | 0.022582641 | 1.71374166  | up   |
| Reep4         | 0.022588424 | 1.658675551 | up   |
| Niban         | 0.022604272 | 1.511819124 | up   |
| Tssc1         | 0.022620894 | 1.842508674 | up   |
| Sox4          | 0.022620894 | 1.783293724 | down |
| Fastkd2       | 0.022622502 | 1.568434835 | up   |
| Glrb          | 0.022630373 | 1.672539115 | up   |
| Foxp3         | 0.02263473  | 1.628240347 | up   |
| Ttn           | 0.022642314 | 1.648602247 | up   |
| C030003D03Rik | 0.022662357 | 1.633996368 | up   |

|               |             |             |      |
|---------------|-------------|-------------|------|
| Atp12a        | 0.022680193 | 1.53197968  | up   |
| Tor1b         | 0.022684358 | 1.570459366 | down |
| LOC669168     | 0.022684358 | 2.294208288 | down |
| Coq10a        | 0.022684358 | 1.695808411 | up   |
| Wtip          | 0.022695728 | 1.727808833 | up   |
| 1700037C18Rik | 0.022697877 | 1.607562184 | up   |
| Cxcl12        | 0.022697877 | 1.714631081 | up   |
| Scly          | 0.022734879 | 1.608123064 | up   |
| LOC100045877  | 0.022741614 | 1.578719258 | up   |
| 4931403I22Rik | 0.022741614 | 1.79199779  | down |
| Itgb4         | 0.022741614 | 2.070733547 | up   |
| Mrpl10        | 0.022741614 | 1.524195671 | up   |
| 6330442E10Rik | 0.022755973 | 1.594863772 | up   |
| B930097H17Rik | 0.022762269 | 1.542278647 | up   |
| Vps8          | 0.022766646 | 1.594685435 | up   |
| Gas6          | 0.02277375  | 1.773910284 | up   |
| 9030409G11Rik | 0.022777239 | 1.598408818 | up   |
| Dhrs1         | 0.022828376 | 1.789581418 | up   |
| EG434907      | 0.022830237 | 1.586091518 | up   |
| Nde1          | 0.022832707 | 2.13058877  | up   |
| Rrp7a         | 0.022833409 | 1.528066397 | up   |
| Pla2g4b       | 0.022873538 | 1.782537818 | up   |
| A230020C19Rik | 0.022873538 | 1.814780951 | down |
| Plekhg5       | 0.022873538 | 1.780961394 | up   |
| Ptprk         | 0.022873538 | 1.602407932 | up   |
| Cd248         | 0.022873538 | 2.008024216 | up   |
| Snora65       | 0.022887066 | 1.664454937 | up   |
| Glt8d2        | 0.022894763 | 1.711622596 | up   |
| Rab34         | 0.022928283 | 1.829192758 | up   |
| LOC641366     | 0.022943756 | 2.390524387 | down |
| 9530027K23Rik | 0.022949552 | 1.856426597 | up   |
| Cacna1h       | 0.022983547 | 1.644453049 | up   |
| Hhat          | 0.022988441 | 1.552055717 | up   |
| LOC100047009  | 0.022996048 | 1.652647853 | down |
| Dgat1         | 0.022996048 | 1.595440269 | up   |
| Prpf31        | 0.022996113 | 1.722579956 | up   |
| LOC100047579  | 0.022996113 | 1.598755717 | up   |
| LOC545487     | 0.023002705 | 3.931880474 | down |
| Frrs1         | 0.023008572 | 1.740227461 | up   |
| Sulf2         | 0.023008572 | 2.155371189 | down |
| Coq6          | 0.02307003  | 1.615132213 | up   |
| Tnks          | 0.023080926 | 1.661463022 | down |
| Slc43a1       | 0.023088943 | 1.548285723 | up   |
| LOC100047264  | 0.023117075 | 1.900161505 | up   |
| Rps19         | 0.023119031 | 1.515654564 | up   |
| D430023I21Rik | 0.023119031 | 1.620405436 | up   |
| Adam15        | 0.023120472 | 1.826420546 | up   |
| Clta          | 0.023125744 | 1.79290092  | up   |

|               |             |             |      |
|---------------|-------------|-------------|------|
| Papss2        | 0.023125744 | 2.034782171 | down |
| Plscr3        | 0.023125744 | 1.514851689 | up   |
| Slc7a2        | 0.023133865 | 1.593890786 | up   |
| Fvt1          | 0.023141012 | 1.590964317 | up   |
| D230048N11Rik | 0.02314801  | 1.796143413 | up   |
| Snn           | 0.023168709 | 1.511974692 | up   |
| Dgke          | 0.023168709 | 1.510702014 | up   |
| Ephb2         | 0.023169875 | 1.642067432 | down |
| Oxt           | 0.023182906 | 1.528424501 | up   |
| Zscan20       | 0.023207942 | 1.565991044 | up   |
| Efna5         | 0.023245871 | 1.599610806 | up   |
| Snhg11        | 0.023266332 | 1.806068659 | up   |
| LOC381981     | 0.023266332 | 1.520785093 | up   |
| Rhoc          | 0.023277732 | 1.640039682 | up   |
| 2610016A17Rik | 0.023277732 | 1.520070195 | up   |
| Dhcr24        | 0.023277732 | 1.623161435 | down |
| Sh3md4        | 0.023277732 | 1.657510042 | up   |
| Rnf121        | 0.023277732 | 1.608963132 | down |
| Klhl26        | 0.023277732 | 1.548696876 | up   |
| Prdx5         | 0.023282845 | 2.447168112 | down |
| Ppa2          | 0.023296118 | 1.507208467 | down |
| Khk           | 0.023296118 | 1.691097617 | up   |
| Tia1          | 0.023301015 | 1.673606753 | up   |
| Pcdh21        | 0.023301015 | 2.120504856 | up   |
| Dync1i1       | 0.023307001 | 1.557070732 | up   |
| H2-Q7         | 0.023314515 | 1.657483101 | up   |
| Slc29a3       | 0.023327082 | 1.84835577  | up   |
| Tsc22d1       | 0.023327265 | 2.271643877 | up   |
| Fbxo3         | 0.023327265 | 2.7089746   | down |
| 5330439J01Rik | 0.023348827 | 2.089283228 | down |
| Ccdc65        | 0.023368228 | 1.611338258 | up   |
| Kcnq5         | 0.02338283  | 2.125079393 | down |
| Eif4enif1     | 0.02338283  | 1.791041136 | up   |
| 5430406J06Rik | 0.02339516  | 1.775479794 | down |
| Tmprss4       | 0.023409253 | 1.544905782 | up   |
| Col11a1       | 0.023426889 | 2.004609585 | down |
| 1110018J18Rik | 0.023446994 | 1.536654949 | up   |
| 1110018J23Rik | 0.02344949  | 1.574401498 | up   |
| LOC384104     | 0.023465941 | 2.113748312 | down |
| MGC41689      | 0.023536885 | 1.823236585 | up   |
| 1700019G17Rik | 0.023537116 | 1.714512825 | up   |
| Dnajc13       | 0.023544507 | 2.327007532 | up   |
| C80913        | 0.023546703 | 1.702159762 | down |
| Akap2         | 0.023546703 | 1.625469327 | up   |
| 6230425C21Rik | 0.023557546 | 1.824457288 | up   |
| Ppargc1b      | 0.023582641 | 1.516608834 | up   |
| Mapre3        | 0.023589345 | 1.673989296 | down |
| 2810021B07Rik | 0.023624774 | 1.736855626 | down |

|                    |             |             |      |
|--------------------|-------------|-------------|------|
| LOC271505          | 0.023631707 | 3.971617699 | down |
| Fahd2a             | 0.023648931 | 1.603322625 | up   |
| Gemin7             | 0.023668733 | 1.771687985 | up   |
| Sel1l              | 0.023694467 | 3.993265629 | down |
| C130057N11Rik      | 0.023694467 | 1.556792498 | up   |
| 1810058I24Rik      | 0.023733042 | 3.318252325 | down |
| BC008163           | 0.023749603 | 2.872507334 | down |
| 4933401P20Rik      | 0.023750432 | 1.675714493 | up   |
| Trpm5              | 0.023750432 | 1.525869846 | up   |
| LOC386270          | 0.023750432 | 1.92858398  | down |
| Tmem9b             | 0.023750432 | 2.020874262 | up   |
| Ankrd6             | 0.023788381 | 1.752595902 | up   |
| Zfp212             | 0.023788381 | 1.551650167 | up   |
| 2810021O14Rik      | 0.02379065  | 1.523215175 | up   |
| Zpld1              | 0.023792507 | 1.533877492 | up   |
| LOC223653          | 0.023792507 | 1.754093289 | up   |
| Mdm4               | 0.023792507 | 1.684967756 | up   |
| Acy3               | 0.023806425 | 1.578506351 | up   |
| Zfp275             | 0.023806425 | 1.649734855 | up   |
| A130047F11Rik      | 0.023806425 | 1.588010311 | down |
| Pde3a              | 0.023811156 | 1.607645631 | up   |
| Golgb1             | 0.023812143 | 1.563291907 | up   |
| 9130213B05Rik      | 0.023820758 | 1.559818626 | up   |
| Myl9               | 0.023820916 | 2.611768007 | up   |
| Ate1               | 0.023823107 | 1.598100185 | up   |
| 6330415B21Rik      | 0.023832373 | 1.670081615 | down |
| Mizf               | 0.02383608  | 1.876211047 | up   |
| Atp6ap2            | 0.023844006 | 1.978302479 | up   |
| Ubox5              | 0.023857005 | 1.654751301 | up   |
| Pcdhga10           | 0.023868516 | 1.606812477 | up   |
| Ptbp1              | 0.023880256 | 1.554322958 | up   |
| Rnf135             | 0.023880256 | 1.578371644 | up   |
| Epb4.9             | 0.023900524 | 1.571344495 | up   |
| Ehd1               | 0.023900524 | 1.636761189 | up   |
| Sumo3              | 0.023900524 | 2.002801895 | up   |
| OTTMUSG00000000421 | 0.023903871 | 1.591713429 | up   |
| Lamp1              | 0.023907052 | 1.815142393 | up   |
| Npr3               | 0.023911178 | 1.580506921 | up   |
| LOC381525          | 0.023911178 | 1.576633692 | up   |
| Mrpl15             | 0.023911178 | 1.657515287 | up   |
| LOC100046608       | 0.023925681 | 1.590238571 | up   |
| Snx14              | 0.023932144 | 1.564789772 | up   |
| Odf3l1             | 0.023945196 | 1.682940722 | up   |
| Agfg1              | 0.023953376 | 1.663761973 | up   |
| Igfbpl1            | 0.023953376 | 1.91601491  | down |
| Abcf1              | 0.023955768 | 1.522230983 | up   |
| Ltbp2              | 0.024025012 | 1.659017682 | up   |
| Trdmt1             | 0.024051283 | 1.582988262 | up   |

|               |             |             |      |
|---------------|-------------|-------------|------|
| Popdc3        | 0.024061745 | 1.537994146 | up   |
| Slc25a2       | 0.024095271 | 1.589147568 | up   |
| Plec1         | 0.024100356 | 1.604737997 | up   |
| Nol4          | 0.0241067   | 3.287555695 | down |
| 1700008H02Rik | 0.024122192 | 2.490914345 | down |
| 1810063B05Rik | 0.024122192 | 1.856878996 | down |
| 2900024O10Rik | 0.024148388 | 1.703561902 | up   |
| Nagpa         | 0.024164081 | 1.571860433 | up   |
| Mbtps2        | 0.024165578 | 1.51530087  | up   |
| 2310016C08Rik | 0.024176354 | 1.670640349 | up   |
| Hrmt1l2       | 0.024176354 | 2.043538094 | up   |
| Apoc2         | 0.024176354 | 1.662402511 | up   |
| 2810405K02Rik | 0.024176354 | 1.770153046 | up   |
| Aamp          | 0.024186686 | 1.546469212 | down |
| Adsl          | 0.024186686 | 1.793107987 | up   |
| Eral1         | 0.024186686 | 1.823162675 | up   |
| C77080        | 0.024186686 | 1.512732506 | up   |
| Abhd10        | 0.024186686 | 2.023592711 | up   |
| Fam120b       | 0.024208803 | 1.600319147 | down |
| Actn3         | 0.024220793 | 1.540004253 | up   |
| lpmk          | 0.024220895 | 1.672956586 | up   |
| Hspa9         | 0.024249226 | 1.525951982 | up   |
| LOC676974     | 0.024260305 | 1.531931639 | up   |
| Amotl1        | 0.024260338 | 1.862997174 | down |
| Tmem161b      | 0.024260338 | 2.033568144 | down |
| Tsn           | 0.024260338 | 4.40406847  | down |
| Brd8          | 0.024288654 | 1.827092886 | up   |
| Cnp           | 0.024289805 | 1.800862432 | up   |
| Slc25a15      | 0.024290664 | 1.734380007 | up   |
| Tgs1          | 0.024290664 | 2.016076088 | down |
| Copg2as2      | 0.024302702 | 1.893936753 | down |
| Dusp22        | 0.02432132  | 1.761821628 | up   |
| Pbx2          | 0.024321504 | 1.587426662 | up   |
| Clint1        | 0.024321504 | 2.272943258 | down |
| Tm9sf2        | 0.024328524 | 2.36627388  | down |
| Pde6d         | 0.024338225 | 1.723430872 | up   |
| Ttpal         | 0.024338225 | 1.538209915 | up   |
| Trim2         | 0.024366964 | 3.839619875 | down |
| Clic6         | 0.024366964 | 1.562488794 | up   |
| Myst3         | 0.024371266 | 1.679836869 | down |
| Qars          | 0.024401613 | 1.783143997 | up   |
| Dcun1d4       | 0.024401613 | 1.65478456  | up   |
| Nup54         | 0.024405032 | 1.577212215 | up   |
| LOC385256     | 0.024421034 | 1.634436607 | up   |
| Ppid          | 0.024446977 | 1.511601687 | down |
| Tipin         | 0.024446977 | 2.504835129 | down |
| Pik3ip1       | 0.024446977 | 1.815788627 | up   |
| Art4          | 0.024448287 | 1.582185507 | up   |

|                 |             |             |      |
|-----------------|-------------|-------------|------|
| Sar1a           | 0.024453528 | 1.637433529 | up   |
| BC027344        | 0.024459502 | 1.884385228 | up   |
| Mtap            | 0.024463318 | 2.11685133  | up   |
| LOC381255       | 0.024497351 | 1.722620368 | up   |
| Pde2a           | 0.024540091 | 1.623135567 | up   |
| Tnip2           | 0.024565756 | 1.520159125 | up   |
| 5430440L12Rik   | 0.024565756 | 2.565839052 | down |
| Rnaset2         | 0.024571283 | 1.512865543 | up   |
| Sh3gl2          | 0.024594786 | 1.622609735 | up   |
| BC021438        | 0.024594786 | 1.686490417 | up   |
| Smad6           | 0.024594786 | 1.611704707 | up   |
| Dock1           | 0.024606509 | 1.668456078 | up   |
| Rnmt1           | 0.024610108 | 1.867081404 | up   |
| Coq6            | 0.024613494 | 1.565078378 | up   |
| 4930528A17Rik   | 0.024613494 | 1.534745932 | up   |
| Acadl           | 0.024641054 | 2.07760644  | up   |
| 2600001B17Rik   | 0.024641054 | 2.794253111 | up   |
| Gpr85           | 0.024641054 | 2.229593277 | down |
| BC004728        | 0.024675852 | 1.708168387 | up   |
| scl0002720.1_68 | 0.024678361 | 1.53012836  | up   |
| Bex4            | 0.024678361 | 1.611734152 | up   |
| Atp9a           | 0.024678361 | 1.845288873 | up   |
| Zdhhc13         | 0.024678361 | 1.633460999 | up   |
| Dlk2            | 0.02472619  | 1.664902329 | up   |
| Rbbp7           | 0.024752462 | 2.38526535  | up   |
| Tarsl2          | 0.024752462 | 1.836077333 | up   |
| Robo4           | 0.024752462 | 1.980917573 | up   |
| Cenpk           | 0.024752462 | 2.191295385 | down |
| St5             | 0.024752462 | 1.883800745 | up   |
| Pin4            | 0.02477007  | 3.59882474  | down |
| Exosc2          | 0.02477007  | 1.750701308 | up   |
| Ndr1            | 0.024785008 | 1.729287267 | up   |
| EG667410        | 0.024785008 | 1.553994179 | up   |
| Scp2            | 0.024789129 | 1.795739889 | up   |
| Dsp             | 0.024789129 | 3.034396887 | up   |
| A730058G16Rik   | 0.024789129 | 1.501344919 | down |
| Phf12           | 0.024821799 | 1.738739848 | up   |
| Csnk2a1-rs4     | 0.024823898 | 1.59814918  | down |
| Lgals3bp        | 0.024831537 | 1.609948516 | up   |
| Ddx19b          | 0.024833541 | 1.514054775 | up   |
| Barx1           | 0.024833541 | 1.983679891 | up   |
| Mamdc4          | 0.024835633 | 1.786732793 | up   |
| Lrrn1           | 0.024838448 | 1.575416923 | down |
| Zfp239          | 0.024850052 | 1.93827045  | up   |
| Kist            | 0.024850916 | 1.575038075 | up   |
| Mat2b           | 0.024903977 | 1.663796783 | up   |
| Rara            | 0.024949867 | 1.639087081 | up   |
| LOC100044190    | 0.024953106 | 1.638198495 | up   |



|                 |             |             |      |
|-----------------|-------------|-------------|------|
| Rhoj            | 0.02495648  | 1.530031443 | up   |
| Pet112l         | 0.024982216 | 1.854303718 | up   |
| scl0004175.1_57 | 0.024997147 | 1.761688471 | up   |
| Crk             | 0.025018156 | 1.630154014 | up   |
| Slc35e3         | 0.025018156 | 2.007858038 | up   |
| Rnaseh2c        | 0.025030997 | 1.73447597  | up   |
| Myl9            | 0.025097314 | 1.679783702 | up   |
| Mcph1           | 0.025101082 | 1.53249979  | up   |
| 2610528B01Rik   | 0.025101082 | 1.738859057 | down |
| Def6            | 0.025114    | 1.623725414 | up   |
| Ascc3           | 0.025126007 | 1.722253919 | up   |
| Pcdhb17         | 0.025128463 | 1.805248141 | down |
| Wnt3            | 0.025136031 | 1.793203712 | up   |
| Lpar3           | 0.025136031 | 1.631058812 | up   |
| Cxxc4           | 0.025136087 | 1.547854066 | down |
| Hsf2            | 0.025145717 | 2.529181719 | down |
| Etv4            | 0.025146311 | 1.609756589 | up   |
| Arpc1a          | 0.025154928 | 1.645087481 | up   |
| Tmem164         | 0.025163205 | 1.568869829 | up   |
| Nedd4b          | 0.025164926 | 1.538226128 | down |
| Kctd10          | 0.025174495 | 1.677629113 | up   |
| 9130020K20Rik   | 0.025177149 | 2.746968508 | down |
| Fbxo27          | 0.025178876 | 1.653633595 | up   |
| Slc10a7         | 0.025231214 | 1.626215696 | up   |
| Chi3l1          | 0.025231214 | 1.596438646 | down |
| Freq            | 0.025231214 | 1.559261322 | up   |
| Mfsd10          | 0.025231883 | 1.553831816 | up   |
| Ankrd50         | 0.025239116 | 1.767619491 | up   |
| Nt5dc3          | 0.025239116 | 1.59585011  | up   |
| Thns1           | 0.025239116 | 1.586515665 | up   |
| Ddx10           | 0.025239116 | 1.509826541 | up   |
| A630007B06Rik   | 0.025241843 | 1.511982322 | up   |
| LOC100043906    | 0.025313072 | 4.887526989 | down |
| Sra1            | 0.025313072 | 1.999520302 | up   |
| 6030446N20Rik   | 0.025313072 | 1.531085014 | up   |
| Akap2           | 0.025333304 | 1.990472913 | up   |
| Dnajc19         | 0.025349712 | 1.51751399  | up   |
| Rapgef4         | 0.025403667 | 1.735148907 | up   |
| Plekhg2         | 0.025416916 | 1.719652534 | up   |
| Sema4f          | 0.025416916 | 1.563287735 | up   |
| LOC381105       | 0.025416916 | 2.001013279 | down |
| Hecw1           | 0.025416916 | 1.857788563 | down |
| Sgk3            | 0.025429606 | 1.639897585 | up   |
| Col6a2          | 0.025434684 | 1.888553977 | up   |
| Cart            | 0.02544588  | 1.606099963 | up   |
| Cdh5            | 0.025475081 | 2.108512402 | up   |
| 4732415M23Rik   | 0.025485471 | 1.595445871 | up   |
| Rabggtb         | 0.025492046 | 1.670616269 | up   |

|               |             |             |      |
|---------------|-------------|-------------|------|
| LOC385959     | 0.025497114 | 2.51709652  | down |
| Dok5          | 0.025520928 | 1.511301041 | up   |
| Tmed4         | 0.025520928 | 1.571489215 | up   |
| LOC329575     | 0.025520928 | 2.877915621 | down |
| Rbmxrt        | 0.025520928 | 1.749711752 | down |
| Ints9         | 0.025538733 | 1.551462174 | up   |
| Pigb          | 0.025543677 | 1.531557202 | up   |
| MacroD2       | 0.025543677 | 1.518496275 | up   |
| Chmp6         | 0.025597274 | 1.510669947 | up   |
| D430004H20Rik | 0.025597274 | 1.594581246 | up   |
| Zfp322a       | 0.025605898 | 3.740749121 | down |
| Mtbp          | 0.025626093 | 1.509504795 | up   |
| Tyw1          | 0.025656398 | 1.565536022 | up   |
| D630011N09Rik | 0.025687009 | 1.539307118 | up   |
| 2310047C04Rik | 0.025691306 | 2.365804195 | up   |
| A930024F17Rik | 0.025711713 | 1.55544889  | up   |
| 4631422C13Rik | 0.025711713 | 1.520938516 | up   |
| Rhbd17        | 0.025711713 | 1.599536896 | up   |
| Tmem134       | 0.025711713 | 1.792229056 | up   |
| Accn3         | 0.025711713 | 1.692849755 | up   |
| Spg20         | 0.025711713 | 1.628908157 | up   |
| Lias          | 0.025718255 | 1.530318379 | down |
| Pi4k2b        | 0.025720315 | 1.549804926 | up   |
| 9430001M03Rik | 0.025742406 | 1.604554176 | up   |
| Rbm12         | 0.025754886 | 1.520947218 | down |
| 3830408P04Rik | 0.025754886 | 1.718554735 | up   |
| Itrip         | 0.025754886 | 1.958350062 | up   |
| Wbscr27       | 0.025754886 | 1.643675447 | up   |
| Foxn4         | 0.025754886 | 1.533078671 | up   |
| Cldn6         | 0.025774211 | 2.557539463 | up   |
| Ywhaz         | 0.025782675 | 2.540822029 | down |
| Mtx2          | 0.025789164 | 1.664726734 | up   |
| Atpaf2        | 0.025823472 | 1.623954177 | up   |
| Mpdu1         | 0.025823472 | 1.503123879 | up   |
| Ltbr          | 0.025823472 | 1.537944913 | up   |
| Lyst          | 0.025823472 | 1.550898194 | up   |
| Abcg4         | 0.025823472 | 1.742854118 | up   |
| Bbs7          | 0.025831513 | 1.578111529 | up   |
| Lingo2        | 0.025840325 | 1.55466485  | up   |
| Calu          | 0.025844796 | 1.555542827 | up   |
| Krt7          | 0.025844796 | 1.59222734  | up   |
| Gpbp1         | 0.025847625 | 1.555667758 | down |
| Dleu2         | 0.02586331  | 1.781032801 | up   |
| Prnt1         | 0.02586857  | 1.604215026 | up   |
| C030033M19Rik | 0.025881652 | 1.563244462 | down |
| Il20rb        | 0.025886897 | 1.710139871 | up   |
| Armc10        | 0.025886897 | 1.664206386 | down |
| St18          | 0.025907263 | 7.775743008 | down |

|               |             |             |      |
|---------------|-------------|-------------|------|
| Echdc2        | 0.025907263 | 1.528123021 | up   |
| Ubp1          | 0.025907263 | 1.568852067 | up   |
| Ptpn1         | 0.025908377 | 4.380230427 | down |
| Gnb4          | 0.025913963 | 1.696318626 | up   |
| C330018D20Rik | 0.025941892 | 1.516558051 | up   |
| Tnnc1         | 0.025961159 | 1.618737221 | up   |
| C030033M12Rik | 0.025970075 | 1.879036427 | down |
| Ifitm2        | 0.025970075 | 1.698155522 | up   |
| Pou5f1        | 0.026018338 | 1.68230176  | up   |
| Slit3         | 0.026018338 | 1.676242232 | up   |
| Mbtps1        | 0.026021894 | 2.323622465 | up   |
| Scarf1        | 0.026026081 | 1.534888983 | up   |
| Npepl1        | 0.026026081 | 1.636174917 | up   |
| Adar          | 0.026026081 | 2.49283123  | down |
| Cdc26         | 0.026026081 | 2.101592779 | down |
| Mylc2b        | 0.026026081 | 1.584136009 | down |
| Snx33         | 0.02603413  | 1.812818289 | up   |
| Pet112l       | 0.026034968 | 1.548941016 | up   |
| A230106M20Rik | 0.026044812 | 2.00133419  | up   |
| Ap4m1         | 0.026062368 | 1.707808256 | up   |
| Spin2         | 0.026075995 | 1.658396363 | up   |
| Ctps2         | 0.026082985 | 1.601388574 | up   |
| Ndufa11       | 0.026089588 | 1.790784597 | up   |
| Dach1         | 0.026124049 | 1.558477759 | up   |
| Elavl4        | 0.026133543 | 3.793795586 | down |
| Hoxb3         | 0.026133543 | 5.049030304 | down |
| Tbc1d10a      | 0.026133543 | 1.881717444 | up   |
| D10Ertd322e   | 0.026133543 | 1.562223434 | up   |
| Rspry1        | 0.026133543 | 3.558865786 | down |
| Cdc25b        | 0.026133543 | 1.504012466 | up   |
| LOC383897     | 0.026133543 | 1.587224364 | up   |
| Mreg          | 0.026141685 | 1.93051517  | up   |
| Scnm1         | 0.026170461 | 1.553744078 | up   |
| B3gnt8        | 0.026170461 | 1.587229967 | up   |
| B3gat2        | 0.026185624 | 1.510452867 | up   |
| Cc2d1a        | 0.026200419 | 1.768219352 | up   |
| Faim          | 0.026202936 | 2.411091566 | down |
| Map4k5        | 0.026226556 | 1.645509005 | up   |
| 5930434B04Rik | 0.026226556 | 1.681369305 | up   |
| Abhd4         | 0.026226556 | 1.838956833 | up   |
| Thnsl1        | 0.026226556 | 1.570795536 | up   |
| Pparbp        | 0.026226556 | 1.654484034 | up   |
| Ifna1         | 0.026226556 | 1.745050073 | up   |
| Mcam          | 0.02622674  | 2.467596769 | up   |
| Zfc3h1        | 0.026250646 | 1.54704237  | up   |
| Als2cr13      | 0.026262827 | 3.567935944 | down |
| Pmp22         | 0.026262827 | 1.897400498 | up   |
| Nphp1         | 0.026262827 | 2.021710157 | up   |

|               |             |             |      |
|---------------|-------------|-------------|------|
| Haghl         | 0.026270641 | 1.563119054 | up   |
| Txndc11       | 0.026275797 | 1.518350482 | up   |
| Zdhhc24       | 0.026277332 | 1.620695353 | up   |
| Itfg3         | 0.026287865 | 1.783935905 | up   |
| Gdf5          | 0.026287865 | 1.501856208 | up   |
| Emcn          | 0.026325403 | 1.786376    | up   |
| Ift52         | 0.026327802 | 1.582767367 | up   |
| 4632434I11Rik | 0.026351381 | 1.592755079 | up   |
| Nrd1          | 0.026353965 | 1.675454736 | up   |
| Lass5         | 0.026353965 | 1.966161013 | up   |
| LOC100047915  | 0.026358072 | 1.863041878 | down |
| Lonrf1        | 0.026361981 | 1.627084255 | up   |
| Gdap10        | 0.026367342 | 1.916637421 | down |
| Tcf3          | 0.026367342 | 1.614472389 | up   |
| Nme2          | 0.026367342 | 1.52468586  | up   |
| Acss1         | 0.026367342 | 1.537099481 | down |
| Ppbp          | 0.026367342 | 3.029294968 | down |
| Mbnl1         | 0.026367342 | 1.676026583 | down |
| Lypd1         | 0.026370244 | 2.41830349  | up   |
| Polr1d        | 0.026381962 | 1.628500342 | up   |
| LOC383836     | 0.026393026 | 1.60314846  | up   |
| LOC100047427  | 0.026393026 | 1.639779925 | up   |
| Emilin2       | 0.026393026 | 1.836941123 | up   |
| D11Bwg0414e   | 0.02640174  | 1.660576701 | up   |
| Prmt8         | 0.026403844 | 5.58437109  | down |
| Tgm2          | 0.026413081 | 1.707795024 | down |
| 2700055A20Rik | 0.026415721 | 4.811782837 | down |
| Sec31l1       | 0.026417017 | 1.637033701 | up   |
| 100041294     | 0.026417017 | 1.742833376 | up   |
| Raly1         | 0.026419994 | 1.511092424 | up   |
| 2810039B14Rik | 0.026430406 | 1.559926748 | up   |
| Ptprd         | 0.026440425 | 1.909022689 | down |
| 2410004N11Rik | 0.026462166 | 1.872613311 | up   |
| Arl8b         | 0.026463216 | 1.552140713 | up   |
| LOC545472     | 0.026497282 | 2.392857552 | down |
| Cyp2s1        | 0.026497282 | 1.530257344 | up   |
| Itga11        | 0.026497282 | 1.655565023 | up   |
| a2ld1         | 0.026497282 | 1.657340646 | up   |
| Eif2ak2       | 0.026497282 | 2.079792976 | up   |
| Wdr51b        | 0.026510926 | 1.612763643 | up   |
| Cd59a         | 0.026510926 | 1.830264568 | up   |
| Chrna1        | 0.026525114 | 1.568944335 | up   |
| 6330406I15Rik | 0.026531929 | 1.596174359 | up   |
| Bcl9l         | 0.026561642 | 1.735089421 | down |
| Mknk1         | 0.026579022 | 1.606302977 | up   |
| Rps9          | 0.026588827 | 1.560705304 | up   |
| Txndc11       | 0.026603427 | 1.503304601 | up   |
| D2Bwg1423e    | 0.026627649 | 1.615328789 | up   |

|               |             |             |      |
|---------------|-------------|-------------|------|
| Mfng          | 0.026661895 | 4.273496151 | down |
| Maf           | 0.026681554 | 1.702198863 | up   |
| Nufip2        | 0.02671833  | 1.509658575 | down |
| Zfp212        | 0.02671833  | 1.538157225 | up   |
| Ctnna2        | 0.02671833  | 3.798143148 | down |
| Adamts3       | 0.02671833  | 1.551538229 | up   |
| D830014B20Rik | 0.026737785 | 1.852300167 | up   |
| Mertk         | 0.026746687 | 2.09731698  | down |
| LOC382465     | 0.026746687 | 1.600940466 | up   |
| Wars2         | 0.026746687 | 1.775277972 | down |
| LOC674004     | 0.02676554  | 4.925053597 | down |
| Ptbp1         | 0.026770931 | 1.555795074 | up   |
| Pdia5         | 0.026770931 | 1.963066936 | up   |
| Apg5l         | 0.026784021 | 1.504658341 | up   |
| Tug1          | 0.026786363 | 2.389960527 | up   |
| Rab8a         | 0.026787756 | 1.678788185 | up   |
| P4hb          | 0.026812084 | 1.65703547  | up   |
| Rab11fip5     | 0.02682505  | 1.798027277 | up   |
| Erc8          | 0.026826236 | 1.857405901 | up   |
| Rgs7          | 0.026829358 | 1.654751658 | up   |
| Gstm2         | 0.026842535 | 1.79594624  | up   |
| Slc30a10      | 0.026847303 | 1.596513391 | up   |
| Glrx2         | 0.026854638 | 3.083699942 | down |
| 4933433P14Rik | 0.026855594 | 1.562795878 | up   |
| Sfxn3         | 0.026855594 | 1.560568929 | up   |
| Clspn         | 0.026869539 | 1.504998803 | down |
| S100pbp       | 0.026869539 | 1.500028968 | up   |
| Asph          | 0.026869539 | 1.519088864 | up   |
| Stx8          | 0.026869539 | 1.527396083 | up   |
| 2900073G15Rik | 0.026869539 | 1.808086157 | up   |
| Timm44        | 0.026869539 | 1.574966073 | up   |
| Fam122b       | 0.026879098 | 1.590674639 | up   |
| Prkg2         | 0.026879098 | 2.101173639 | down |
| Ogfod1        | 0.026921377 | 1.606532216 | up   |
| Abhd11        | 0.026935844 | 1.530041218 | up   |
| Afap1         | 0.026935866 | 1.59734416  | up   |
| Meis2         | 0.026946327 | 1.503676415 | down |
| Tmem38b       | 0.026946327 | 1.543681145 | up   |
| Sln           | 0.026946327 | 1.605552316 | up   |
| Ube2d1        | 0.026946327 | 1.53482914  | up   |
| Zfp521        | 0.026946327 | 1.588275909 | up   |
| Polm          | 0.026946327 | 1.638597131 | up   |
| Snx6          | 0.026946327 | 1.84070313  | up   |
| 2610024G14Rik | 0.026946327 | 1.672836423 | up   |
| Rps6kl1       | 0.026946327 | 1.659649253 | up   |
| 3110035E14Rik | 0.026950484 | 1.558245421 | down |
| Krt17         | 0.026951646 | 2.959543943 | up   |
| Pcm1          | 0.026964886 | 3.300732374 | down |

|                |             |             |      |
|----------------|-------------|-------------|------|
| Zfp113         | 0.02700972  | 2.708885908 | down |
| Glt8d1         | 0.027012231 | 1.665601492 | up   |
| Chrna4         | 0.027013289 | 4.589321137 | down |
| Dtnb           | 0.027023206 | 1.528187871 | up   |
| LOC100045644   | 0.027036538 | 1.736202836 | up   |
| 4833420G11Rik  | 0.027056256 | 1.55401969  | up   |
| Ppnr           | 0.02705715  | 1.9111408   | down |
| Map3k7         | 0.027112283 | 1.872915387 | down |
| Fbxw7          | 0.027112544 | 1.574082971 | down |
| A2bp1          | 0.027112544 | 1.828560233 | down |
| Faah           | 0.02712548  | 1.591732025 | up   |
| Htra3          | 0.027149113 | 1.771133304 | up   |
| Rilpl1         | 0.027229013 | 1.512639761 | up   |
| Spin1          | 0.027229013 | 2.070182562 | up   |
| Ptcd3          | 0.02725338  | 1.683154821 | down |
| F11r           | 0.027272388 | 1.647493362 | up   |
| 2010001H16Rik  | 0.027284723 | 1.550769568 | up   |
| Slc9a6         | 0.027284723 | 1.606795669 | up   |
| LOC674427      | 0.027284723 | 1.690324664 | up   |
| Zadh2          | 0.027298875 | 1.724560499 | up   |
| Acta2          | 0.027349493 | 2.663325548 | up   |
| Mtfmt          | 0.027360603 | 1.568965554 | up   |
| Tax1bp1        | 0.027360603 | 1.91344583  | down |
| Capzb          | 0.027360603 | 1.712669969 | up   |
| Pdlim3         | 0.027360603 | 1.562441349 | up   |
| BC026590       | 0.027360603 | 1.891112447 | up   |
| Aebp2          | 0.027429499 | 1.723865151 | up   |
| Zdhhc1         | 0.027447149 | 1.519811034 | up   |
| scl0002547.1_9 | 0.02746857  | 1.590014458 | down |
| Fam131a        | 0.027507545 | 2.021424055 | down |
| Usp52          | 0.027507644 | 1.517469764 | up   |
| Dscr1          | 0.027546672 | 1.523755431 | up   |
| Afg3l1         | 0.027546672 | 1.888124943 | up   |
| Jagn1          | 0.027591392 | 1.611032486 | up   |
| Dcx            | 0.027594112 | 3.346492767 | down |
| Uchl5          | 0.027613277 | 1.796848655 | down |
| Cyp27a1        | 0.027642926 | 1.542849898 | up   |
| Aebp2          | 0.027657917 | 1.849905491 | up   |
| Ganc           | 0.027672447 | 1.544990182 | up   |
| 1200016D23Rik  | 0.027687056 | 1.628642678 | up   |
| Fam13c         | 0.027693685 | 1.620222092 | up   |
| Ncoa4          | 0.027700804 | 1.569239855 | up   |
| Sin3b          | 0.027702345 | 1.504166246 | up   |
| Mcm10          | 0.027702345 | 1.603678584 | up   |
| Dorz1          | 0.027708128 | 2.552302599 | up   |
| Sim2           | 0.027708622 | 1.803269506 | down |
| Ccbl2          | 0.027722266 | 1.580010414 | up   |
| E230020D15Rik  | 0.027722266 | 1.615412712 | down |

|                 |             |             |      |
|-----------------|-------------|-------------|------|
| Fbxw4           | 0.027734825 | 1.662856817 | up   |
| Ppp1r14b        | 0.027737975 | 1.524020553 | down |
| 5730409K12Rik   | 0.027737975 | 1.809856296 | up   |
| 4632404H12Rik   | 0.027787799 | 1.588802099 | up   |
| Mpg             | 0.027799141 | 1.551888585 | up   |
| Mrpl18          | 0.02780522  | 2.807289124 | down |
| Lamp2           | 0.02783915  | 1.607890725 | up   |
| Trim69          | 0.027860686 | 1.613491774 | up   |
| Senp5           | 0.027873479 | 1.628500462 | up   |
| Timm8a1         | 0.027875032 | 1.638612986 | down |
| Osbp            | 0.027882962 | 2.718029976 | down |
| Mxd4            | 0.027882962 | 1.636723161 | up   |
| Myo1b           | 0.027882962 | 2.869684696 | down |
| Arl10c          | 0.027882962 | 1.541435838 | up   |
| Ric8b           | 0.027885396 | 2.201886177 | down |
| 4931406P16Rik   | 0.027891882 | 1.822182775 | up   |
| Rpap3           | 0.027906688 | 1.705803156 | up   |
| 2610024H22Rik   | 0.027939865 | 2.055477858 | down |
| Camk2d          | 0.027955076 | 1.716328144 | up   |
| Gm1008          | 0.027967297 | 1.513813376 | up   |
| Seh1l           | 0.027967297 | 1.811846376 | up   |
| Tmem101         | 0.028001213 | 1.706711412 | up   |
| Igk-V1          | 0.028001213 | 1.65182507  | up   |
| Akr1c19         | 0.028001213 | 1.610110879 | up   |
| Clptm1l         | 0.028016031 | 1.930399776 | up   |
| Zfp312          | 0.028045975 | 1.586424828 | up   |
| 0610031J06Rik   | 0.028061399 | 1.720502973 | up   |
| 2310040B03Rik   | 0.028064515 | 1.511780143 | up   |
| LOC100046841    | 0.028082036 | 4.019485951 | down |
| Foxp2           | 0.028164564 | 1.624937177 | up   |
| Wdr40c          | 0.028182847 | 1.794133663 | down |
| Orai3           | 0.028195217 | 1.530039907 | up   |
| Trim37          | 0.028239388 | 2.207437515 | down |
| Uncx            | 0.028250525 | 1.661578298 | down |
| E430002G05Rik   | 0.028250525 | 1.525925756 | up   |
| Mxd4            | 0.02827296  | 1.524269223 | up   |
| Mett11d1        | 0.02827296  | 2.105715752 | up   |
| Arhgap22        | 0.028290734 | 1.752790451 | up   |
| A730008L03Rik   | 0.028290734 | 1.877373695 | up   |
| 1700020O03Rik   | 0.028293982 | 2.101079941 | down |
| Aim1l           | 0.028293982 | 1.70334363  | up   |
| B230365C01Rik   | 0.028298996 | 2.474878073 | down |
| 2810484G07Rik   | 0.028372543 | 2.946617842 | down |
| Olfir538        | 0.028377615 | 1.737084508 | up   |
| Lrrc8           | 0.028377615 | 1.525708199 | up   |
| Adamts12        | 0.028402144 | 1.665921211 | up   |
| B930095G15Rik   | 0.028402144 | 1.635040402 | down |
| scl0001534.1_16 | 0.028427808 | 1.860778689 | up   |

|               |             |             |      |
|---------------|-------------|-------------|------|
| Ing4          | 0.028427808 | 1.596772075 | up   |
| Sidt2         | 0.02843078  | 1.842948318 | up   |
| Al464131      | 0.028441729 | 1.597222328 | up   |
| Fmnl3         | 0.028441729 | 1.78928411  | up   |
| Gjb6          | 0.028444422 | 2.173983812 | up   |
| Rgag4         | 0.028461123 | 1.550311446 | up   |
| 6330439K17Rik | 0.028471073 | 1.916797161 | down |
| Mtrf1l        | 0.028473882 | 3.169497013 | down |
| Pgp           | 0.028492704 | 1.510418057 | down |
| Grb7          | 0.028551078 | 1.983660221 | up   |
| Sfrs16        | 0.028590983 | 1.658891201 | down |
| 9330134C04Rik | 0.028590983 | 1.581057668 | up   |
| BC023151      | 0.028594459 | 1.51757896  | up   |
| Mff           | 0.028621918 | 1.713010311 | up   |
| Serpini1      | 0.028621918 | 1.629582048 | down |
| Slc38a3       | 0.028625395 | 1.742062211 | up   |
| Pkp4          | 0.028657824 | 2.417450666 | up   |
| Gm114         | 0.028665807 | 1.667310357 | up   |
| Tshz3         | 0.028670009 | 1.775392175 | up   |
| Mcm6          | 0.028670009 | 11.24821663 | down |
| Pdha1         | 0.028678687 | 1.565930843 | up   |
| Rap2c         | 0.028678687 | 1.886301637 | down |
| LOC676640     | 0.028678687 | 1.958680272 | down |
| Srr           | 0.028696263 | 1.622927189 | down |
| Cacnb3        | 0.028703176 | 1.682098389 | up   |
| 2700094K13Rik | 0.028703176 | 1.525568724 | down |
| 2810417K24Rik | 0.028703176 | 1.687769175 | down |
| Pum1          | 0.0287535   | 1.548317313 | down |
| Refbp2        | 0.0287535   | 2.306913853 | down |
| LOC100047184  | 0.028754348 | 1.614117384 | down |
| LOC100047173  | 0.028808892 | 1.571497202 | up   |
| Oc90          | 0.028808892 | 4.068250179 | up   |
| Taf12         | 0.028810173 | 1.681245565 | up   |
| Mcart6        | 0.028845165 | 1.543673396 | up   |
| Pcnx          | 0.028860036 | 1.622799873 | up   |
| 0610030E20Rik | 0.028867669 | 1.571699858 | down |
| Gstm2         | 0.028901044 | 1.609073877 | up   |
| Plekhf1       | 0.028949276 | 1.631626129 | up   |
| Mpdz          | 0.028957715 | 1.740692735 | up   |
| Smg6          | 0.028957715 | 1.917463899 | up   |
| Cd248         | 0.028963585 | 1.562383294 | up   |
| Mtap7         | 0.028974792 | 1.66708076  | up   |
| Cib2          | 0.028988212 | 1.696259022 | up   |
| Txndc4        | 0.02900986  | 2.04467535  | down |
| 0610031J06Rik | 0.029018952 | 1.570447445 | up   |
| Akp2          | 0.029024579 | 1.531524062 | up   |
| Mtmr14        | 0.029024579 | 1.545539022 | up   |
| Mrg1          | 0.029024579 | 1.733362079 | down |



|               |             |             |      |
|---------------|-------------|-------------|------|
| Prmt2         | 0.029036792 | 1.519814611 | up   |
| Notch3        | 0.029068582 | 1.56441009  | up   |
| Ubqln1        | 0.029087836 | 1.717883945 | up   |
| Insl6         | 0.029089032 | 1.516557336 | up   |
| Lonrf2        | 0.029110663 | 1.598227024 | up   |
| Wdr43         | 0.02913104  | 1.884290338 | up   |
| A430024H01Rik | 0.02913104  | 1.626386285 | up   |
| 1700085B03Rik | 0.029166685 | 1.592478037 | up   |
| Zdhhc16       | 0.029187497 | 1.628306866 | up   |
| Anks3         | 0.029209739 | 1.694904804 | up   |
| Mfsd10        | 0.029255815 | 1.567563772 | up   |
| 9230112G11Rik | 0.029256797 | 1.514317751 | down |
| Med9          | 0.029275071 | 1.729164958 | up   |
| D11Wsu99e     | 0.029311631 | 1.70733428  | up   |
| Scoc          | 0.029328078 | 3.418934822 | down |
| Zfp364        | 0.029344112 | 1.855145931 | down |
| Thbs3         | 0.029344924 | 1.543448329 | up   |
| Hspb1         | 0.029363191 | 1.815460086 | up   |
| Acta2         | 0.029363191 | 1.711580515 | up   |
| Ethe1         | 0.029363191 | 1.768212557 | up   |
| Aig1          | 0.029369617 | 1.540420175 | up   |
| LOC381200     | 0.029395932 | 1.582753539 | up   |
| 9330152L17    | 0.029408539 | 1.907881737 | down |
| Prim1         | 0.02944392  | 2.214730978 | down |
| Bcas1         | 0.029475207 | 1.657806397 | down |
| 2310016C16Rik | 0.029531336 | 1.718999267 | up   |
| Atp13a3       | 0.029543078 | 1.529669285 | up   |
| Papss2        | 0.029543078 | 1.707736969 | down |
| Mcam          | 0.029544398 | 1.807081103 | up   |
| Ensa          | 0.029572913 | 1.713445067 | up   |
| Lmna          | 0.029575888 | 1.600558281 | up   |
| A930029B02Rik | 0.029606462 | 1.538309097 | up   |
| Pnpla2        | 0.029620072 | 1.741575718 | up   |
| 2700033B16Rik | 0.029639551 | 1.681651235 | up   |
| Senp6         | 0.029646043 | 1.570310593 | up   |
| Fzd8          | 0.029646043 | 1.668245792 | up   |
| Zfp664        | 0.029646043 | 1.841240764 | up   |
| 4732442E24Rik | 0.029647617 | 1.538217902 | up   |
| Heatr5a       | 0.029654384 | 1.947371602 | down |
| LOC208166     | 0.029660752 | 1.696879864 | up   |
| Mkrn1         | 0.029687297 | 1.699000955 | down |
| Mapk9         | 0.029738369 | 1.527712703 | up   |
| 2310007H09Rik | 0.029745437 | 1.540451527 | up   |
| Acacb         | 0.029752836 | 1.592097521 | up   |
| Myo9b         | 0.029752836 | 1.646127701 | up   |
| Foxa3         | 0.029752836 | 1.894910812 | down |
| Ifi30         | 0.029768894 | 1.513687849 | up   |
| Ltbp4         | 0.02977672  | 2.141326904 | up   |

|                       |             |             |      |
|-----------------------|-------------|-------------|------|
| Ilvbl                 | 0.029818041 | 2.052839518 | up   |
| Cdh5                  | 0.029818041 | 1.843039036 | up   |
| Cd97                  | 0.0298404   | 1.604313612 | up   |
| Mtbp                  | 0.029844366 | 1.640318275 | up   |
| Gabarapl2             | 0.029846137 | 1.961745739 | down |
| Afmid                 | 0.029884238 | 1.736949205 | up   |
| Dbx1                  | 0.029888662 | 1.643950105 | down |
| Mid2                  | 0.029888662 | 1.558360934 | up   |
| Frzb                  | 0.029888662 | 1.877044559 | down |
| Dicer1                | 0.029889222 | 2.214615822 | down |
| Ddx28                 | 0.02989126  | 1.641943336 | up   |
| Skil                  | 0.02994547  | 1.511991978 | down |
| Mfsd9                 | 0.029947968 | 1.503466129 | up   |
| Anxa3                 | 0.02996574  | 2.279321671 | up   |
| Rpl10a                | 0.029969674 | 2.108971834 | down |
| Rabl2a                | 0.029986566 | 1.631922603 | up   |
| Mbtps1                | 0.03003272  | 1.896953344 | up   |
| V00785_lg_heavy_const | 0.03003272  | 1.58356154  | up   |
| Aco1                  | 0.030056078 | 1.642617703 | down |
| Smarca2               | 0.03007333  | 1.595980644 | up   |
| Trappc1               | 0.030094326 | 1.562215686 | up   |
| Cxcl14                | 0.030094326 | 1.5744313   | up   |
| Gpx7                  | 0.030105149 | 1.595425248 | up   |
| Hmga2                 | 0.030112024 | 2.009763241 | down |
| Mtrf1                 | 0.030113114 | 1.602805853 | up   |
| Asb9                  | 0.030119075 | 1.501103878 | up   |
| Fip1l1                | 0.030146644 | 3.076507092 | down |
| Opa1                  | 0.030152256 | 1.507286549 | up   |
| Etfb                  | 0.030229777 | 1.889317751 | up   |
| Stub1                 | 0.030252883 | 1.602163792 | up   |
| Ctsa                  | 0.030253775 | 1.51715827  | up   |
| A130038H09Rik         | 0.030253775 | 1.535893798 | up   |
| scl000292.1_12        | 0.030303821 | 1.765047669 | up   |
| Map4k2                | 0.030307576 | 1.85468936  | up   |
| Gmpa                  | 0.030309053 | 1.682019949 | up   |
| Nrxn1                 | 0.030316748 | 1.507935166 | up   |
| Tmem120b              | 0.030339377 | 1.507872343 | up   |
| Asph                  | 0.030348077 | 1.633422256 | up   |
| Mcm3                  | 0.030363364 | 1.743076801 | up   |
| Ssbp2                 | 0.030363364 | 1.765969753 | up   |
| Nt5c3l                | 0.03036668  | 1.889875889 | up   |
| Gabbr1                | 0.030368153 | 1.589981437 | up   |
| Rplp0                 | 0.030368153 | 2.356648207 | down |
| A630084D02Rik         | 0.030382408 | 2.963712692 | down |
| 1600002H07Rik         | 0.03042924  | 1.976994515 | down |
| A1837181              | 0.03042924  | 1.509674668 | down |
| Oaz2                  | 0.030499885 | 1.513807893 | up   |
| Tbx15                 | 0.030504221 | 1.590451598 | up   |

|               |             |             |      |
|---------------|-------------|-------------|------|
| Abi1          | 0.030504221 | 1.873409629 | down |
| lars2         | 0.030504221 | 1.589694977 | up   |
| Nrp2          | 0.030513294 | 1.503936052 | up   |
| Rnf25         | 0.030513294 | 1.867015362 | up   |
| Rbms3         | 0.030513294 | 2.295167208 | down |
| LOC383860     | 0.030513294 | 1.764351845 | up   |
| LOC380888     | 0.030551158 | 1.667047262 | up   |
| Ypel4         | 0.0305607   | 1.553146243 | up   |
| Lgtn          | 0.0305692   | 1.84411788  | up   |
| Zfp263        | 0.03057191  | 3.186406136 | down |
| Eya1          | 0.030628974 | 1.579699397 | up   |
| 1110021L09Rik | 0.030671848 | 2.676906824 | down |
| Decr2         | 0.030671848 | 1.764048815 | up   |
| Ncoa6         | 0.030671848 | 1.7943151   | up   |
| Arid1a        | 0.030740051 | 1.668958545 | down |
| Acta2         | 0.030757951 | 2.90301919  | up   |
| Smox          | 0.03077961  | 1.851334691 | up   |
| Trex2         | 0.030830206 | 1.538734675 | up   |
| Osbpl8        | 0.030830698 | 1.515735984 | up   |
| Asah2         | 0.030835558 | 1.529835701 | up   |
| Usp7          | 0.030843636 | 1.533867955 | up   |
| Tulp1         | 0.030843636 | 1.618751407 | up   |
| Nucb1         | 0.030851699 | 1.576314688 | up   |
| Ccdc98        | 0.030851699 | 1.53328681  | down |
| 9330151L19Rik | 0.030873148 | 1.807281137 | up   |
| Fancc         | 0.030883692 | 1.574878931 | up   |
| Cldn5         | 0.030898245 | 2.271008253 | up   |
| Hbp1          | 0.03089829  | 1.503505707 | up   |
| Glyctk        | 0.03089829  | 1.877753735 | up   |
| Atp6ap2       | 0.03089829  | 1.710296631 | up   |
| Hsd17b4       | 0.030900534 | 1.559193134 | up   |
| Evi1          | 0.030902976 | 1.77359283  | up   |
| Tpm4          | 0.030904748 | 1.678726554 | up   |
| C230060D12Rik | 0.030922763 | 1.507926583 | up   |
| Slc44a2       | 0.03095465  | 1.523117781 | up   |
| Dek           | 0.031024393 | 2.914137125 | down |
| B230322F03Rik | 0.031049334 | 1.533273697 | up   |
| Cnga1         | 0.031052679 | 1.521505237 | up   |
| Atox1         | 0.031058217 | 1.594394684 | up   |
| Ddhd1         | 0.031058217 | 1.912640452 | up   |
| LOC386021     | 0.031058217 | 1.901959539 | down |
| Caskin1       | 0.031066457 | 1.753399253 | up   |
| Clip2         | 0.031073825 | 1.578637362 | down |
| Lypd3         | 0.031084012 | 1.906809449 | up   |
| Pop7          | 0.031108018 | 1.62401104  | up   |
| Ndufs2        | 0.031108018 | 1.610663772 | up   |
| AI851790      | 0.031115254 | 1.57173574  | up   |
| Cd63          | 0.031120822 | 1.798962355 | up   |

|                  |             |             |      |
|------------------|-------------|-------------|------|
| Vapb             | 0.031120822 | 1.67388463  | up   |
| Smurf1           | 0.031182999 | 1.509688258 | up   |
| EG624138         | 0.031205697 | 1.560395122 | up   |
| St6galnac4       | 0.031209065 | 1.592423916 | up   |
| Fbxl10           | 0.031219957 | 1.52978003  | up   |
| LOC270491        | 0.031219957 | 1.547472596 | up   |
| Acy1             | 0.031220693 | 1.551064611 | down |
| Cdc25a           | 0.031263851 | 1.586982369 | down |
| Vps41            | 0.031263851 | 1.923785567 | up   |
| Dgkh             | 0.031263851 | 1.518365383 | up   |
| Egln1            | 0.031292979 | 1.570744515 | up   |
| Psap             | 0.031294793 | 1.519998908 | up   |
| Nudt19           | 0.031304129 | 1.604734182 | up   |
| 2810002D19Rik    | 0.031329934 | 1.994616389 | down |
| EG434280         | 0.03133573  | 1.868241072 | up   |
| Fgfr2            | 0.031341277 | 1.534162521 | down |
| 3110001A13Rik    | 0.03136462  | 1.868430734 | up   |
| Nme7             | 0.031372234 | 4.946968556 | down |
| Papd4            | 0.031372234 | 1.833988071 | up   |
| Micall2          | 0.031372234 | 1.692086935 | up   |
| Prosc            | 0.031372476 | 1.551361799 | up   |
| 8430415N23Rik    | 0.031402595 | 1.786611915 | down |
| 9530077C05Rik    | 0.031433292 | 1.731611013 | up   |
| Rnpc3            | 0.031433292 | 1.966447353 | down |
| Pdia3            | 0.031437375 | 1.771489024 | up   |
| Slmo2            | 0.031446952 | 1.659236312 | down |
| Tmem199          | 0.031469733 | 1.627209306 | down |
| scl00238693.1_37 | 0.031506244 | 1.564427137 | up   |
| Trpc3            | 0.031538252 | 1.71190989  | up   |
| Gm962            | 0.031586733 | 1.549809814 | up   |
| Crim2            | 0.031595808 | 1.725671172 | up   |
| Pex19            | 0.031607453 | 2.831524611 | down |
| Tmem32           | 0.031651683 | 2.048749685 | down |
| Golph3l          | 0.031651683 | 1.944182396 | down |
| Wwtr1            | 0.031651683 | 1.71940124  | up   |
| Rusc1            | 0.031651683 | 1.652538657 | up   |
| Zcchc14          | 0.031655647 | 1.690110087 | up   |
| 4933421E11Rik    | 0.031690516 | 1.576277137 | up   |
| Mrps22           | 0.031711131 | 1.586488128 | up   |
| LOC100043822     | 0.031720564 | 1.976833701 | down |
| 3110056O03Rik    | 0.031734686 | 1.537610412 | up   |
| Cox6b1           | 0.031750556 | 1.503103733 | up   |
| Shq1             | 0.031750556 | 1.644196034 | up   |
| Nap1l5           | 0.031769957 | 2.706310034 | down |
| Zic3             | 0.031785309 | 2.627598286 | down |
| Gnb1             | 0.031785309 | 1.949632049 | up   |
| Rps26            | 0.031785309 | 1.664353252 | up   |
| Abcd4            | 0.031785309 | 1.645703673 | up   |

|               |             |             |      |
|---------------|-------------|-------------|------|
| Pfdn4         | 0.031786639 | 4.021124363 | down |
| Cnot4         | 0.031786639 | 2.910654545 | down |
| 5430437P03Rik | 0.031786639 | 1.62628293  | up   |
| Id2           | 0.031794488 | 4.620919704 | down |
| Trim45        | 0.03182929  | 1.639558554 | up   |
| Gck           | 0.031830173 | 1.524319291 | up   |
| Usp29         | 0.031834714 | 1.547872663 | up   |
| Mtus1         | 0.031834714 | 1.759315252 | down |
| Cenpj         | 0.031853035 | 2.299944878 | down |
| Lmx1a         | 0.031853035 | 1.600459933 | up   |
| Srebf2        | 0.031859011 | 1.6712358   | up   |
| Uchl5         | 0.031911381 | 2.00066638  | down |
| Ehbp1l1       | 0.031951223 | 1.636701345 | up   |
| Rtl1          | 0.031957787 | 1.698897958 | up   |
| Tiam1         | 0.031993203 | 1.507913351 | up   |
| 1110005A23Rik | 0.031995587 | 5.427640915 | down |
| 1700040I03Rik | 0.031995587 | 1.502797604 | up   |
| Zbtb33        | 0.032002442 | 1.975539208 | down |
| A930038D23Rik | 0.032022722 | 1.605605245 | up   |
| Akr1a4        | 0.032032557 | 1.564214706 | up   |
| Ccndbp1       | 0.032050192 | 1.562249661 | up   |
| 2310043J07Rik | 0.032063741 | 1.500001788 | up   |
| Aldh2         | 0.032073207 | 1.549734712 | up   |
| LOC382096     | 0.032120287 | 3.824896336 | down |
| Rhod          | 0.03213818  | 1.561836958 | up   |
| Mdh2          | 0.032179292 | 2.325920582 | down |
| Rab3d         | 0.032286231 | 1.617559314 | up   |
| Sez6l2        | 0.032286231 | 1.523634195 | up   |
| Mpeg1         | 0.032302115 | 1.955189943 | down |
| LOC100044008  | 0.03230812  | 3.193525314 | down |
| Zfp236        | 0.03230812  | 1.918269157 | down |
| 1500003O22Rik | 0.032315016 | 2.810074091 | down |
| Rabgta        | 0.032369256 | 1.836091638 | up   |
| Sema3f        | 0.032382228 | 1.584920287 | up   |
| Ikbkg         | 0.032408483 | 1.664376855 | up   |
| Bid           | 0.032438874 | 1.51270771  | up   |
| Slc10a7       | 0.032438874 | 1.511489272 | up   |
| Tnc           | 0.032438874 | 1.676503539 | up   |
| Hnrnpf        | 0.032438874 | 1.809911728 | up   |
| Znf512b       | 0.03245138  | 1.577176929 | up   |
| Rab31         | 0.032474648 | 1.548935175 | up   |
| Plp1          | 0.032486331 | 2.875418901 | up   |
| Snrk          | 0.032491464 | 1.784790635 | up   |
| Wars          | 0.032500491 | 1.604062557 | up   |
| Smox          | 0.032506835 | 1.748138428 | up   |
| Eya1          | 0.032506835 | 1.542437673 | up   |
| 2900002G04Rik | 0.032525931 | 1.506278396 | up   |
| Prdx2         | 0.032525931 | 1.892920137 | down |

|               |             |             |      |
|---------------|-------------|-------------|------|
| A930005L06Rik | 0.032553282 | 1.547621489 | up   |
| Plekhg3       | 0.032553282 | 1.756416917 | up   |
| Ccdc111       | 0.032646313 | 1.732067227 | up   |
| Zbtb8b        | 0.032715716 | 1.73449862  | up   |
| Fbxo18        | 0.032719791 | 2.497284174 | down |
| 9430065L19Rik | 0.032753333 | 1.579486847 | down |
| BC002199      | 0.03277047  | 1.544176102 | up   |
| 2610209M04Rik | 0.032800529 | 2.104150534 | down |
| 4732418C07Rik | 0.032800529 | 1.741468072 | up   |
| Pnpla7        | 0.032827478 | 1.582681418 | up   |
| 1110008L16Rik | 0.03290125  | 1.641346216 | up   |
| Pbx1          | 0.032902844 | 1.512648821 | up   |
| LOC212963     | 0.032902844 | 1.824072242 | up   |
| Sema3f        | 0.032906845 | 1.528925896 | up   |
| Gbx2          | 0.032907192 | 1.973621488 | down |
| LOC381986     | 0.032927413 | 1.534062862 | up   |
| Cog1          | 0.032938287 | 1.938012719 | up   |
| Ccdc6         | 0.033014499 | 3.392610073 | down |
| Ppox          | 0.033032745 | 1.538250327 | up   |
| Tmem168       | 0.033033256 | 1.642778516 | up   |
| Lman1         | 0.033042196 | 2.043184996 | down |
| Tbx1          | 0.033042196 | 1.628616214 | up   |
| Frs2          | 0.033042196 | 1.629254341 | up   |
| Sumf2         | 0.033042196 | 1.79304421  | up   |
| Uba52         | 0.033042196 | 1.668511868 | down |
| Pgm5          | 0.033044465 | 1.562931538 | up   |
| Rabep2        | 0.033044465 | 1.599362612 | up   |
| Ttc8          | 0.033058006 | 1.641539812 | up   |
| Ankfy1        | 0.033060767 | 1.592227697 | up   |
| Sipa1l2       | 0.033071749 | 1.600637078 | up   |
| 9830166G06Rik | 0.033083174 | 1.521059513 | up   |
| Gng8          | 0.033083174 | 1.809063554 | up   |
| Dhrs7b        | 0.033095315 | 1.523376942 | up   |
| Spag4         | 0.033095367 | 1.524130464 | up   |
| Amn           | 0.033102788 | 1.532149077 | up   |
| Zfp607        | 0.033105552 | 1.604794741 | up   |
| 6030405A18Rik | 0.033115994 | 1.609917402 | up   |
| 2810423A18Rik | 0.03314019  | 1.867673993 | down |
| Rnpep         | 0.033176668 | 1.511849284 | up   |
| Myo10         | 0.033186309 | 1.700320125 | up   |
| Eif2s3x       | 0.033186309 | 1.568044424 | down |
| Zmpste24      | 0.033186309 | 1.504839659 | up   |
| Ccdc40        | 0.033186309 | 1.533145547 | up   |
| Abcf1         | 0.033228066 | 1.551396012 | up   |
| BC003331      | 0.033252131 | 4.39692831  | down |
| Asphd1        | 0.033330958 | 1.619994044 | up   |
| Tbrg4         | 0.033331171 | 1.51945293  | up   |
| LOC100040919  | 0.033331171 | 1.843165636 | up   |

|               |             |             |      |
|---------------|-------------|-------------|------|
| Trim8         | 0.033338793 | 1.562320828 | down |
| Dync1li2      | 0.033344671 | 1.710753679 | up   |
| Mospd1        | 0.033344671 | 2.053426027 | down |
| Cadps         | 0.033384834 | 1.605071545 | down |
| LOC214111     | 0.033391587 | 1.513002634 | up   |
| Gtf3c4        | 0.033420928 | 1.56583786  | up   |
| Mpv17l        | 0.033452768 | 1.500830293 | up   |
| 4732441L20Rik | 0.033453584 | 1.664955139 | up   |
| Btd           | 0.033466302 | 1.662049055 | up   |
| B930067C07Rik | 0.033483211 | 1.580323219 | down |
| AI593442      | 0.033489529 | 1.749751449 | up   |
| D230037D09Rik | 0.033496514 | 1.546057224 | down |
| Arf5          | 0.033505805 | 1.649889112 | down |
| Fam173a       | 0.033544868 | 1.778350115 | up   |
| Srbd1         | 0.033544868 | 2.141215324 | down |
| Ankrd6        | 0.033544868 | 1.827680707 | up   |
| Psmg2         | 0.033544868 | 1.707842231 | up   |
| Rgs10         | 0.033643276 | 2.614722729 | down |
| Srpx2         | 0.033643276 | 1.712261438 | up   |
| Rsph1         | 0.033681937 | 1.518684149 | up   |
| Tacstd2       | 0.033731688 | 2.791885853 | up   |
| Lgi3          | 0.033732034 | 1.712386608 | up   |
| 1500010G04Rik | 0.033732034 | 2.609591484 | down |
| Memo1         | 0.033732034 | 2.160106421 | down |
| Cpt2          | 0.033790402 | 2.466161728 | down |
| Atp11c        | 0.033835169 | 1.644250631 | up   |
| Bccip         | 0.033847004 | 2.243093491 | down |
| 3110003A17Rik | 0.033847138 | 1.683123589 | down |
| 2900060N12Rik | 0.033925876 | 1.689997673 | up   |
| Kpna6         | 0.03395528  | 1.569957137 | up   |
| Pecam1        | 0.03396596  | 1.752328038 | up   |
| Rbm41         | 0.034003049 | 1.561410546 | up   |
| Aldh1a2       | 0.034003049 | 2.144871235 | up   |
| Aqp1          | 0.034003049 | 1.992206931 | up   |
| Ubr1          | 0.034012083 | 1.774479032 | up   |
| Lmcd1         | 0.034028444 | 1.525070906 | down |
| Rbm41         | 0.03406236  | 1.504709601 | up   |
| Sfi1          | 0.034139879 | 1.638821125 | up   |
| Fads2         | 0.034148116 | 1.6228019   | up   |
| Itga10        | 0.034175087 | 1.845992923 | down |
| Nudcd2        | 0.034187533 | 4.132079125 | down |
| Fam149b       | 0.034199666 | 1.645675421 | up   |
| 5330408N05Rik | 0.034201585 | 1.554896951 | down |
| Traf3ip1      | 0.034206677 | 1.588404775 | up   |
| Tex264        | 0.034222692 | 1.683625221 | up   |
| Cnr1          | 0.034222692 | 1.51412046  | up   |
| LOC100046025  | 0.034238298 | 1.517375469 | up   |
| Snx2          | 0.034261242 | 2.244595051 | up   |

|               |             |             |      |
|---------------|-------------|-------------|------|
| LOC100039346  | 0.034273893 | 2.467739105 | down |
| Skd3          | 0.03428087  | 1.522257328 | up   |
| 1110008F13Rik | 0.034299959 | 1.902320027 | down |
| LOC100048726  | 0.03431765  | 2.183740139 | down |
| Fbxo32        | 0.034351312 | 1.528366208 | up   |
| 1110003P22Rik | 0.03435418  | 2.448050261 | down |
| Apex1         | 0.034356151 | 1.767712712 | down |
| 2310035C23Rik | 0.034406379 | 2.121509075 | up   |
| Map2k6        | 0.034418076 | 1.981641054 | up   |
| 6430411K18Rik | 0.034424644 | 1.839274287 | up   |
| Mpz           | 0.034433715 | 2.334480763 | up   |
| LOC385651     | 0.034433715 | 1.64594996  | up   |
| 9030025P20Rik | 0.034433715 | 1.769819617 | up   |
| Ppfia1        | 0.034433715 | 1.931825757 | up   |
| Tpr           | 0.034497909 | 1.73875773  | up   |
| 2410016O06Rik | 0.034497909 | 1.525724769 | up   |
| Mmrn2         | 0.034514349 | 1.787147522 | up   |
| 6030458A17Rik | 0.034516972 | 1.518116236 | up   |
| Rasgrp3       | 0.03452136  | 1.540870428 | up   |
| 9030425E11Rik | 0.03452136  | 2.027069807 | down |
| Shroom3       | 0.03452136  | 1.598723769 | up   |
| Galnt1        | 0.03452136  | 1.563987374 | up   |
| Creg1         | 0.03452136  | 1.725657105 | up   |
| Sh3glb1       | 0.034547325 | 3.307876825 | down |
| 2810017I02Rik | 0.034547325 | 1.576373816 | up   |
| Ctdspl2       | 0.034547325 | 1.532184362 | up   |
| Fahd2a        | 0.034547325 | 1.541128039 | up   |
| Sidt2         | 0.034553971 | 1.82403326  | up   |
| AI314180      | 0.034553971 | 2.497552633 | down |
| Anp32a        | 0.03459812  | 1.64906764  | up   |
| Funcd1        | 0.03459812  | 1.525100708 | up   |
| Asap3         | 0.03459812  | 1.577381969 | up   |
| Ppp1r12a      | 0.03459812  | 2.00460577  | down |
| Lrp12         | 0.03460487  | 1.565947413 | down |
| Ddrk1         | 0.034610983 | 1.554594398 | up   |
| Mrgpra2       | 0.034661915 | 1.728336692 | up   |
| D15Mit260     | 0.0346676   | 1.707399488 | down |
| Ppm1b         | 0.0346676   | 1.824744344 | up   |
| 2010009J12Rik | 0.034670036 | 1.669093013 | down |
| LOC100047353  | 0.034672879 | 1.701561689 | up   |
| Pde4d         | 0.034672879 | 1.502422571 | up   |
| LOC100047260  | 0.03473866  | 1.80736053  | up   |
| Neto2         | 0.03473866  | 2.341834784 | down |
| Ela1          | 0.03473866  | 1.588070631 | up   |
| Nsun5         | 0.034756098 | 1.722378492 | up   |
| Fam168a       | 0.034756098 | 4.676870346 | down |
| Fnip1         | 0.034756098 | 2.116612673 | down |
| Mme           | 0.03476052  | 2.044068337 | up   |



|               |             |             |      |
|---------------|-------------|-------------|------|
| Tprkb         | 0.034775864 | 1.776126981 | up   |
| Mtap2         | 0.034798268 | 1.541220665 | down |
| Zmym1         | 0.0348043   | 1.587408304 | up   |
| Tspan18       | 0.034861762 | 1.70498836  | up   |
| Ubiad1        | 0.034890041 | 1.51559782  | up   |
| Apaf1         | 0.034907445 | 1.563602924 | up   |
| Fibp          | 0.034907445 | 1.590910673 | up   |
| Cmtm7         | 0.034934394 | 2.043777943 | up   |
| Ggnbp1        | 0.0349392   | 1.717003942 | up   |
| Rps6          | 0.034941975 | 1.546259165 | up   |
| Mterfd3       | 0.034941975 | 1.645665646 | down |
| Irx3          | 0.035015184 | 1.56071341  | up   |
| LOC100044159  | 0.035020355 | 1.555500507 | up   |
| Tmed4         | 0.03502826  | 1.778216362 | up   |
| Lrrc14        | 0.03502826  | 2.005975008 | down |
| Slc25a37      | 0.035043716 | 1.675470829 | up   |
| Nme7          | 0.035147682 | 3.791926384 | down |
| Slc15a4       | 0.035147682 | 1.574252129 | up   |
| Mbnl2         | 0.035147682 | 2.915253401 | down |
| 5730601F06Rik | 0.035147682 | 1.770135999 | up   |
| 6030429G01Rik | 0.035156418 | 1.525359154 | up   |
| Mtif2         | 0.035210613 | 1.629735112 | down |
| Rab3a         | 0.03524873  | 2.826663971 | down |
| Tdrd3         | 0.03524873  | 1.917447448 | up   |
| Cdh1          | 0.0352493   | 2.49124527  | up   |
| 9430028L06Rik | 0.0352493   | 1.688407064 | down |
| Krr1          | 0.035278715 | 1.633091927 | up   |
| Fam129a       | 0.035286501 | 1.504360437 | up   |
| Tubd1         | 0.035286501 | 1.658228636 | up   |
| Nfib          | 0.035310119 | 2.002110958 | down |
| Flnc          | 0.035310119 | 1.799526095 | up   |
| Eapp          | 0.035323944 | 2.082078219 | down |
| LOC386123     | 0.035357311 | 2.196273804 | down |
| 2700007P21Rik | 0.035377596 | 1.626297951 | up   |
| Prkab1        | 0.035395283 | 1.552347422 | up   |
| Egln3         | 0.035409197 | 1.56449306  | down |
| Pmm1          | 0.03540922  | 1.522615314 | up   |
| Dact2         | 0.035442121 | 1.580868363 | up   |
| D1Bwg0212e    | 0.03546064  | 1.576556087 | up   |
| Emr1          | 0.035486233 | 1.973137856 | down |
| Rab5c         | 0.035495304 | 3.106201172 | down |
| Bpnt1         | 0.035508171 | 1.588183522 | up   |
| Cstf2         | 0.035512004 | 1.530222535 | down |
| 2210021J22Rik | 0.03560156  | 1.667471051 | up   |
| Mpped1        | 0.035615992 | 1.53749311  | up   |
| Epha7         | 0.035615992 | 1.909336686 | up   |
| Col9a1        | 0.035713706 | 1.630497336 | down |
| LOC637353     | 0.035730612 | 1.693844676 | up   |

|               |             |             |      |
|---------------|-------------|-------------|------|
| Dtx2          | 0.035730612 | 1.573862076 | up   |
| Terf2ip       | 0.035730612 | 1.532993317 | down |
| Lims1         | 0.035730612 | 2.461640596 | down |
| Ppa2          | 0.035785299 | 2.438605547 | down |
| Rorb          | 0.035785299 | 1.580135465 | up   |
| Nme4          | 0.035823058 | 1.649847627 | up   |
| E2f6          | 0.035823058 | 1.755440831 | up   |
| Adck5         | 0.035836484 | 1.563684106 | up   |
| Ercc4         | 0.035836484 | 1.837912321 | down |
| Cox11         | 0.03591612  | 2.099522114 | down |
| Slc45a3       | 0.035939794 | 1.782197952 | up   |
| Fah           | 0.035939794 | 1.577612996 | up   |
| EG630499      | 0.036019906 | 1.809317827 | up   |
| Zfhx3         | 0.036063239 | 1.584697604 | down |
| Pitx2         | 0.036096945 | 1.852009296 | up   |
| Slc35f5       | 0.036118332 | 1.898015976 | down |
| 4930579E17Rik | 0.0361466   | 1.65117991  | up   |
| Rasl12        | 0.036150459 | 1.698372841 | up   |
| Mmp2          | 0.03616247  | 1.528495312 | up   |
| Rabgap1       | 0.036163107 | 1.551641464 | up   |
| Sf3b2         | 0.036163107 | 1.502104759 | up   |
| Tsc1          | 0.036181167 | 3.493497133 | down |
| 4933407C03Rik | 0.036242291 | 5.307877064 | down |
| LOC331139     | 0.036270168 | 1.737972379 | up   |
| Bag5          | 0.036311816 | 1.797182441 | down |
| Prkcq         | 0.036317211 | 1.553976417 | up   |
| Top3b         | 0.036322031 | 1.837668777 | up   |
| Dpp6          | 0.036336653 | 1.501231313 | up   |
| Mbtps1        | 0.036336653 | 1.617158175 | up   |
| LOC330267     | 0.036338519 | 1.662921548 | down |
| BC011248      | 0.036338519 | 1.580245972 | up   |
| Smc4          | 0.036338519 | 2.181024551 | down |
| Cdc42ep4      | 0.036338519 | 1.637778044 | up   |
| Ptn           | 0.036350459 | 1.604098082 | up   |
| Ift88         | 0.0363761   | 1.605382919 | up   |
| LOC381947     | 0.0363761   | 1.625520349 | up   |
| 1700013A01Rik | 0.036377128 | 1.637412667 | down |
| Zfp28         | 0.036377408 | 1.759431243 | up   |
| 2310040A07Rik | 0.036377408 | 1.95963347  | down |
| Eif3eip       | 0.036377408 | 1.6255548   | up   |
| Crabp2        | 0.036407188 | 1.784733057 | up   |
| Atf2          | 0.036436088 | 1.594232082 | up   |
| 5330401F18Rik | 0.036477301 | 2.578150988 | down |
| Iqsec3        | 0.036477856 | 1.64064467  | up   |
| Hip1          | 0.036479339 | 2.011731386 | down |
| Skz1-pending  | 0.036479339 | 1.556569815 | down |
| Spc25         | 0.036532957 | 2.154967547 | down |
| Pdcd2l        | 0.036534417 | 1.523199439 | down |

|               |             |             |      |
|---------------|-------------|-------------|------|
| LOC381801     | 0.036620941 | 1.560330629 | up   |
| Afg3l1        | 0.036662836 | 1.98920095  | up   |
| Shcbp1        | 0.036662836 | 1.658955574 | down |
| Myl1          | 0.036662836 | 1.598588586 | up   |
| Plaa          | 0.036677048 | 3.3327384   | down |
| Atxn10        | 0.036677446 | 1.682330012 | down |
| Glipr2        | 0.03668325  | 1.803641558 | up   |
| Fbxo36        | 0.036834471 | 1.634528279 | up   |
| Rbm4b         | 0.036967732 | 1.659240723 | down |
| Ppp2r3a       | 0.036990497 | 1.553857327 | up   |
| Rnf219        | 0.037019253 | 2.326157332 | down |
| Hsd3b7        | 0.037019253 | 1.61200738  | up   |
| Nfib          | 0.037044019 | 1.540476203 | down |
| Mrps31        | 0.037054565 | 1.585889101 | up   |
| Cxcr4         | 0.037061397 | 1.727725983 | down |
| Mfge8         | 0.037061397 | 1.573057294 | up   |
| 4930570C03Rik | 0.03706396  | 1.562776804 | up   |
| EG633640      | 0.037071191 | 1.595697165 | up   |
| Col12a1       | 0.037111823 | 1.905227065 | up   |
| Elp2          | 0.037161671 | 1.50028801  | down |
| Fbxo32        | 0.037161671 | 1.561836124 | up   |
| Atg4d         | 0.037161671 | 1.72950089  | up   |
| 2010007L18Rik | 0.037261438 | 4.025471687 | down |
| Rad51ap1      | 0.037276078 | 1.509172916 | up   |
| Tusc2         | 0.037310872 | 1.56485951  | up   |
| Cd97          | 0.037332725 | 1.552051663 | up   |
| Fbln1         | 0.037370987 | 1.885430932 | up   |
| Dvl2          | 0.037400603 | 1.563253045 | up   |
| Clip3         | 0.037414525 | 1.519509435 | down |
| Idh3g         | 0.037431967 | 1.502750397 | up   |
| Mbtd1         | 0.03743697  | 2.740798235 | down |
| Jmy           | 0.03743697  | 1.639730692 | up   |
| Trim41        | 0.03743697  | 1.625254154 | up   |
| Slc17a5       | 0.03743697  | 1.812611342 | up   |
| St8sia3       | 0.03743697  | 1.785185814 | down |
| Med8          | 0.03743697  | 1.757070065 | up   |
| Krba1         | 0.037448753 | 1.796358585 | down |
| Mll1          | 0.037448753 | 2.11644125  | down |
| 9330159F19Rik | 0.037448753 | 2.938209534 | down |
| Kcnmb4        | 0.03748446  | 1.544195771 | up   |
| Lrp11         | 0.037486024 | 1.557338238 | down |
| Tspan17       | 0.037535992 | 1.854019165 | up   |
| Rbbp7         | 0.037587646 | 2.172591448 | up   |
| 4930438D12Rik | 0.037587646 | 1.546450853 | up   |
| 2310004I03Rik | 0.037596233 | 2.176558971 | down |
| Hbs1l         | 0.037627328 | 1.552370071 | up   |
| Fbxo9         | 0.037686452 | 1.588924289 | up   |
| Rgs16         | 0.037719477 | 1.761289358 | up   |

|               |             |             |      |
|---------------|-------------|-------------|------|
| Zfp386        | 0.037725352 | 1.507188082 | up   |
| Hsp105        | 0.037770353 | 2.052255392 | down |
| LOC100044576  | 0.03777628  | 1.621023655 | up   |
| AI553587      | 0.03777628  | 1.595452786 | up   |
| Wdr33         | 0.03778382  | 1.52545476  | up   |
| Als2          | 0.03778382  | 1.610647678 | up   |
| Xpc           | 0.03781268  | 1.749504209 | down |
| Smpd4         | 0.037819598 | 1.635833502 | down |
| Tssk4         | 0.037824281 | 1.535773397 | up   |
| Ankra2        | 0.037847899 | 1.563921094 | up   |
| D930038J03Rik | 0.037890673 | 1.716406703 | up   |
| BC024868      | 0.037898604 | 1.517678022 | up   |
| Cdc123        | 0.037898604 | 3.020993233 | down |
| Noxo1         | 0.03790085  | 1.587154269 | up   |
| Abce1         | 0.037915066 | 4.658296108 | down |
| Lrrc1         | 0.037953708 | 1.831821084 | up   |
| 1810055E12Rik | 0.037968125 | 1.563848972 | down |
| Tomm34        | 0.038007841 | 1.550408244 | up   |
| LOC674707     | 0.038014811 | 3.214371204 | down |
| Phf20         | 0.038014811 | 4.161310196 | down |
| Atl2          | 0.038026899 | 1.616796136 | up   |
| Calm2         | 0.038047757 | 1.928426981 | down |
| Tmem147       | 0.038047757 | 1.614418268 | up   |
| Nefm          | 0.038047757 | 1.673852325 | down |
| 5031436O03Rik | 0.038052075 | 1.541813135 | up   |
| Glul          | 0.038052075 | 2.877321482 | down |
| Rnf10         | 0.038052075 | 1.905380726 | up   |
| AU014645      | 0.038075812 | 1.80367589  | up   |
| Dync1h1       | 0.038076181 | 2.124534369 | up   |
| Rexo4         | 0.038116224 | 1.988161326 | up   |
| Pdia6         | 0.038116224 | 2.126909971 | down |
| Col9a1        | 0.038123295 | 11.82479382 | down |
| 9330171B01Rik | 0.038143937 | 1.620916128 | down |
| Elovl1        | 0.03818078  | 1.882636309 | up   |
| Zfp39         | 0.038184948 | 1.590619206 | up   |
| C330002I19Rik | 0.038184948 | 1.841724038 | down |
| 9430077D24Rik | 0.038249642 | 1.890314817 | up   |
| Maea          | 0.038249873 | 1.905144692 | up   |
| Hagh          | 0.038268242 | 1.548351884 | up   |
| Siglech       | 0.038315766 | 1.943838    | down |
| Slc38a4       | 0.03836365  | 1.964632154 | down |
| Rnf10         | 0.038364749 | 1.524564982 | up   |
| Myl4          | 0.038376294 | 1.67110002  | up   |
| Akr7a5        | 0.038408671 | 1.610565782 | up   |
| Ube2j1        | 0.038464468 | 2.660007    | down |
| LOC665237     | 0.038464468 | 2.139510393 | up   |
| Mknk1         | 0.038464468 | 1.59507072  | up   |
| E030038D23Rik | 0.038480278 | 1.609140039 | down |

|               |             |             |      |
|---------------|-------------|-------------|------|
| Acpl2         | 0.03851977  | 1.507196546 | down |
| Ppp2r1b       | 0.038614959 | 1.505588412 | up   |
| Ints3         | 0.038625814 | 1.898773432 | up   |
| Snhg10        | 0.038723655 | 1.571330786 | up   |
| A930009E05Rik | 0.038744293 | 1.94148171  | down |
| Lama4         | 0.038744293 | 1.517658472 | up   |
| Tnnt1         | 0.038744293 | 2.21926713  | up   |
| 5430433G21Rik | 0.038755804 | 1.624912024 | down |
| Psemb2        | 0.038785659 | 1.554743052 | up   |
| Vgll3         | 0.038829807 | 1.569160223 | up   |
| Nek1          | 0.038839541 | 1.677017689 | up   |
| Ttll1         | 0.038875029 | 1.539525986 | up   |
| St8sia4       | 0.03890568  | 3.115969658 | down |
| Tubb2c        | 0.038912468 | 1.750983715 | down |
| Mcam          | 0.038941573 | 1.855166197 | up   |
| Lrrn3         | 0.039021805 | 1.840212226 | down |
| Ubfd1         | 0.03902809  | 1.921609998 | down |
| Oprl1         | 0.039039973 | 1.900141478 | up   |
| Adcy4         | 0.039054859 | 1.56166184  | up   |
| 2610016F04Rik | 0.039054859 | 3.460516214 | down |
| Emp3          | 0.03910007  | 1.871018648 | up   |
| Ppm1e         | 0.039124407 | 1.522260547 | down |
| Tbc1d20       | 0.03917658  | 1.618924379 | down |
| Sez6          | 0.039188579 | 1.700114965 | up   |
| Trove2        | 0.039188579 | 2.791873217 | down |
| Serpina1b     | 0.039188579 | 1.608806372 | up   |
| Phox2a        | 0.039191656 | 2.039249659 | up   |
| Actr10        | 0.039212421 | 1.843064904 | down |
| Wdr45l        | 0.039262526 | 1.757350922 | up   |
| 6330407J23Rik | 0.039268054 | 2.838205576 | down |
| Prpf3         | 0.039293747 | 1.823522449 | up   |
| Wapal         | 0.039310508 | 1.597291231 | up   |
| Sfrs2         | 0.039320778 | 1.666710615 | up   |
| Ppp3r1        | 0.039353088 | 1.889593482 | up   |
| E230027K01Rik | 0.039355617 | 1.62140882  | up   |
| Taf11         | 0.039361734 | 1.502123833 | up   |
| Urm1          | 0.039384525 | 1.527867794 | up   |
| Ppp1r10       | 0.039396197 | 1.944948435 | down |
| Asph          | 0.039411657 | 1.554145455 | up   |
| D12Wsu95e     | 0.039444111 | 2.877092362 | down |
| Necap1        | 0.039449677 | 1.63934505  | up   |
| Lasp1         | 0.039449677 | 1.619863749 | up   |
| Utx           | 0.039491713 | 1.597622991 | down |
| Taf6l         | 0.03949922  | 1.505701065 | up   |
| Dusp10        | 0.039502278 | 1.548292041 | up   |
| Coq5          | 0.03958289  | 1.503633499 | up   |
| Rreb1         | 0.039586    | 1.629484773 | up   |
| Taf1          | 0.039586    | 2.118201971 | down |

|               |             |             |      |
|---------------|-------------|-------------|------|
| Frmd4b        | 0.039591182 | 2.866351605 | down |
| Kremen        | 0.039608404 | 1.516552806 | up   |
| Atp6v1a       | 0.039646652 | 3.656881571 | down |
| Ydjc          | 0.039652214 | 1.979972601 | down |
| LOC665235     | 0.039686009 | 5.708820343 | down |
| Yy2           | 0.039707761 | 1.666549683 | up   |
| Gemin7        | 0.039718639 | 1.775089979 | up   |
| Reep1         | 0.039768819 | 1.611571431 | down |
| B230312I18Rik | 0.039775152 | 1.635258913 | up   |
| Gtf2f1        | 0.039777316 | 1.786022782 | up   |
| Plp2          | 0.039819136 | 1.705309033 | up   |
| A630036P20Rik | 0.039819136 | 1.795637846 | down |
| 5430437P03Rik | 0.039854094 | 1.837265372 | up   |
| Sugt1         | 0.039871227 | 2.872573614 | down |
| Pla2g4b       | 0.039884802 | 1.812785864 | up   |
| Gpr23         | 0.039888471 | 3.774223805 | down |
| Ctsh          | 0.039894439 | 1.76351583  | up   |
| Nit1          | 0.039894439 | 2.277081251 | down |
| Rnf111        | 0.039894439 | 1.66894114  | up   |
| Cdk9          | 0.039894439 | 1.674052119 | up   |
| Mrps15        | 0.039894439 | 1.716216207 | down |
| Gabrb3        | 0.039934386 | 1.954173803 | up   |
| Idi1          | 0.039934393 | 3.186533451 | down |
| Elovl1        | 0.039934393 | 1.52536428  | up   |
| Numa1         | 0.03994076  | 1.515494943 | up   |
| Tcea3         | 0.03994076  | 1.639083862 | up   |
| LOC100046143  | 0.039943885 | 1.5993191   | down |
| Cnot10        | 0.039981227 | 1.846111417 | up   |
| A130049L09Rik | 0.040069927 | 1.594388962 | up   |
| Pcbp3         | 0.040072151 | 1.509883404 | up   |
| Josd2         | 0.040100403 | 1.928955078 | up   |
| Tmem2         | 0.040107153 | 3.613222599 | down |
| LOC383872     | 0.040268526 | 1.503664017 | up   |
| Nelf          | 0.04027224  | 1.926457167 | up   |
| Ormdl3        | 0.040316697 | 1.509365559 | up   |
| Gatc          | 0.04032224  | 1.657716274 | up   |
| 3100003M19Rik | 0.040328294 | 1.838279247 | up   |
| Cycs          | 0.0403722   | 3.634145975 | down |
| Gja4          | 0.040374443 | 2.194069386 | up   |
| Herpud2       | 0.040379122 | 1.715319872 | up   |
| Tshz2         | 0.04039197  | 1.758626103 | down |
| LOC100044696  | 0.040404126 | 3.881947041 | down |
| E2f3          | 0.040453829 | 1.648246527 | down |
| Tcf12         | 0.040509388 | 1.750166893 | down |
| Dmtf1         | 0.040535189 | 3.018440008 | down |
| Cul4a         | 0.040569056 | 1.608663082 | up   |
| Thoc4         | 0.040576208 | 1.734910965 | up   |
| Slc25a27      | 0.040576208 | 1.652027369 | up   |

|               |             |             |      |
|---------------|-------------|-------------|------|
| Cd93          | 0.040576208 | 1.532142758 | up   |
| Dnmt1         | 0.040659122 | 2.134157419 | down |
| A1314976      | 0.040690474 | 1.689166188 | down |
| Ptprs         | 0.040708423 | 1.642102122 | down |
| 1810022K09Rik | 0.040708508 | 2.546657324 | down |
| 2310079P03Rik | 0.040718015 | 2.01312089  | down |
| Klf16         | 0.040727887 | 1.552788138 | up   |
| 732482        | 0.040737804 | 1.595599294 | up   |
| Apbb1ip       | 0.040755771 | 1.507820606 | up   |
| Rab8a         | 0.04075896  | 1.757183313 | up   |
| Bmp1          | 0.040793464 | 1.738113046 | up   |
| Myh10         | 0.040793464 | 1.665982604 | up   |
| Nup133        | 0.040794734 | 1.659139156 | down |
| Shprh         | 0.040802702 | 1.506545067 | up   |
| Syt4          | 0.040802702 | 1.826842308 | down |
| Elmod3        | 0.040802702 | 1.549108028 | up   |
| Dcps          | 0.040821273 | 1.618342876 | up   |
| LOC100046298  | 0.04085651  | 3.672389269 | down |
| Plk2          | 0.040903006 | 1.823985696 | up   |
| Ascc3l1       | 0.040969335 | 2.43304348  | down |
| ORF19         | 0.040979084 | 2.761018753 | down |
| Mapk1         | 0.040983804 | 1.745192647 | up   |
| Wdr76         | 0.041046664 | 1.913261175 | down |
| 2700062C07Rik | 0.041053575 | 1.610464335 | up   |
| Sh3kbp1       | 0.041053575 | 1.810052514 | up   |
| Repin1        | 0.041053575 | 1.731721878 | up   |
| Psen1         | 0.041141644 | 1.591003895 | up   |
| Mia1          | 0.041160375 | 1.953158498 | down |
| Srfbp1        | 0.041201122 | 2.233648777 | down |
| Rbms1         | 0.04121146  | 1.739798307 | up   |
| Mrps15        | 0.041259822 | 2.963686705 | down |
| Nsmce2        | 0.041276231 | 1.582140684 | down |
| Stxbp2        | 0.041276231 | 1.785886049 | up   |
| Sfmbt1        | 0.041289363 | 1.642952085 | up   |
| Tssc4         | 0.041307986 | 1.562817335 | up   |
| Dhx29         | 0.041307986 | 1.712465286 | up   |
| Srd5a3        | 0.04133039  | 1.591461539 | up   |
| Ccdc59        | 0.041421294 | 2.562474012 | down |
| Reep5         | 0.041425061 | 1.620755076 | up   |
| Wfdc6a        | 0.041425061 | 1.577238202 | up   |
| Znfx1         | 0.041454848 | 1.620736718 | up   |
| Snpc3         | 0.041493386 | 1.591758251 | up   |
| Fance         | 0.041513957 | 1.676932693 | up   |
| 2310022K01Rik | 0.041571476 | 1.518654585 | up   |
| Vegfa         | 0.041598231 | 1.605612993 | up   |
| Cldn12        | 0.041632406 | 1.782491326 | down |
| Nudt13        | 0.041632406 | 1.582317472 | up   |
| Slc9a3r2      | 0.041632406 | 1.523306727 | up   |

|               |             |             |      |
|---------------|-------------|-------------|------|
| Tmtc4         | 0.041632406 | 1.573067308 | up   |
| Pogk          | 0.041632406 | 1.70642376  | up   |
| Chchd4        | 0.041632406 | 1.543181181 | up   |
| Kremen2       | 0.041632406 | 1.681076527 | up   |
| 6230415M23Rik | 0.041655634 | 1.573527813 | down |
| Vac14         | 0.041688055 | 1.616160274 | up   |
| 1810030N24Rik | 0.041736014 | 1.533046484 | up   |
| lqwd1         | 0.041782945 | 1.672563314 | up   |
| Ccdc85b       | 0.041796345 | 1.804696798 | up   |
| Itgb4         | 0.041810986 | 1.925690413 | up   |
| C79407        | 0.041841988 | 1.791411877 | down |
| Papd4         | 0.04185677  | 1.77568388  | up   |
| Zfand2b       | 0.041870873 | 1.628444076 | up   |
| Kcnab2        | 0.04187768  | 1.633401513 | up   |
| Kctd20        | 0.041882433 | 1.508466244 | up   |
| Pcdha7        | 0.041890327 | 1.561352015 | down |
| D1Ert471e     | 0.041890327 | 1.63830483  | down |
| Bmf           | 0.041896135 | 1.800726652 | up   |
| Sfrp1         | 0.041909836 | 1.593710661 | down |
| Pdcd4         | 0.041910682 | 2.215114117 | down |
| Adam22        | 0.041920077 | 1.505896688 | up   |
| Cxcl14        | 0.041943714 | 1.843580723 | up   |
| A430041B07Rik | 0.041954558 | 1.52143085  | up   |
| Cyb561        | 0.041954558 | 1.611446261 | up   |
| Epb4.9        | 0.041964803 | 1.590167403 | up   |
| Pde4dip       | 0.041964803 | 1.555087447 | up   |
| Map3k7ip1     | 0.041997369 | 1.608697891 | up   |
| 2810452K22Rik | 0.042017404 | 1.589414954 | up   |
| Foxred1       | 0.042032335 | 1.593425393 | up   |
| LOC100048858  | 0.042040724 | 2.377880096 | down |
| Cdc42se2      | 0.042105962 | 3.283918381 | down |
| LOC677317     | 0.042178225 | 2.444622994 | down |
| AW551984      | 0.042184871 | 1.561046243 | up   |
| Mki67         | 0.042188063 | 2.990350723 | down |
| Dnajc27       | 0.042257574 | 1.611613393 | up   |
| Rps4y2        | 0.042289194 | 1.633862019 | up   |
| Rras          | 0.042289998 | 1.515535235 | up   |
| Zfand2b       | 0.042300306 | 1.512717962 | up   |
| Apc           | 0.042303242 | 1.718425632 | up   |
| Megf10        | 0.042333972 | 2.129940748 | up   |
| Prnp          | 0.042333972 | 1.532065153 | up   |
| Robo2         | 0.042389616 | 1.518780828 | up   |
| Ftsj3         | 0.042409144 | 1.734473825 | down |
| Tmem136       | 0.042420104 | 1.62801981  | down |
| Rab7          | 0.042486277 | 1.687840939 | up   |
| Rps6ka1       | 0.042517297 | 1.511804819 | up   |
| Tirap         | 0.042537488 | 1.606068492 | up   |
| Ctsk          | 0.042537488 | 1.548027396 | up   |



|               |             |             |      |
|---------------|-------------|-------------|------|
| Zfp329        | 0.042592812 | 2.204562426 | down |
| Ccnb1         | 0.042607497 | 2.72508049  | down |
| LOC386005     | 0.042616036 | 2.025693655 | down |
| Lin7a         | 0.042655177 | 1.608685613 | down |
| Cpsf1         | 0.042684291 | 1.671303153 | up   |
| Psmc11        | 0.042755745 | 2.798700094 | down |
| D1Erttd396e   | 0.042767074 | 3.044498205 | down |
| Nfia          | 0.042795286 | 1.942586541 | up   |
| Blcap         | 0.042850994 | 1.613950133 | up   |
| Tardbp        | 0.042869546 | 1.589760065 | up   |
| Tgif2         | 0.042869546 | 1.563896537 | up   |
| LOC100041864  | 0.042915124 | 1.896019697 | down |
| Snap29        | 0.04294651  | 2.2523489   | down |
| Wdr89         | 0.043007191 | 4.202586651 | down |
| 2900001A12Rik | 0.043012966 | 1.939251304 | down |
| Dguok         | 0.043109439 | 1.570461392 | up   |
| Mapk1         | 0.043142095 | 1.77041018  | up   |
| Rbm3          | 0.043162394 | 1.782150388 | up   |
| Rnf41         | 0.043181725 | 1.573591232 | up   |
| 0610010F05Rik | 0.043221951 | 2.544930458 | down |
| 1110005A23Rik | 0.043235108 | 3.571550608 | down |
| LOC384943     | 0.043237388 | 1.580131888 | up   |
| Msl2l1        | 0.043281447 | 1.533810854 | down |
| Rbm9          | 0.043282382 | 1.515487909 | up   |
| Vkorc1l1      | 0.043292563 | 1.763584137 | up   |
| 2310047013Rik | 0.043316066 | 1.775619984 | down |
| Olfir724      | 0.043347713 | 1.584443212 | up   |
| Ulk2          | 0.043349467 | 1.937405109 | down |
| Kctd5         | 0.043485053 | 1.724708796 | up   |
| Fn1           | 0.043486372 | 2.97982192  | down |
| Abhd12        | 0.043512426 | 1.517980576 | up   |
| Msl2l1        | 0.043576159 | 3.342426062 | down |
| Ndfip2        | 0.043576159 | 3.606239796 | down |
| Prep          | 0.043594528 | 2.69943285  | down |
| BC023744      | 0.04362144  | 1.847045302 | up   |
| Smo           | 0.043641176 | 1.552044272 | up   |
| Arfgap2       | 0.043719001 | 1.599322915 | up   |
| Napg          | 0.043741513 | 1.552349567 | up   |
| Nfat5         | 0.043781508 | 1.719042063 | up   |
| Gm129         | 0.043781508 | 1.519572616 | up   |
| Sqle          | 0.043781508 | 1.873963237 | up   |
| AA407526      | 0.043781508 | 1.723120928 | down |
| Aatf          | 0.043781508 | 1.794566512 | up   |
| 3110001O07Rik | 0.043782413 | 1.654144287 | up   |
| Tuba1a        | 0.043790069 | 1.930386066 | down |
| 2500002L14Rik | 0.043803461 | 1.652361155 | up   |
| Tnpo2         | 0.043815579 | 1.509243727 | up   |
| Rnf26         | 0.043815579 | 1.627982259 | up   |

|                |             |             |      |
|----------------|-------------|-------------|------|
| Ppp1ca         | 0.043867454 | 1.659392119 | up   |
| AA536717       | 0.043893706 | 1.560150623 | up   |
| A030009H04Rik  | 0.043917391 | 2.949975967 | down |
| Syne2          | 0.043928571 | 1.561118126 | down |
| Slain2         | 0.043931734 | 3.133173466 | down |
| Eml3           | 0.043931734 | 1.599015594 | up   |
| Chmp2a         | 0.043932241 | 1.603190899 | up   |
| Zc3hc1         | 0.043962576 | 1.598521352 | up   |
| Ndufc2         | 0.043962576 | 2.711074114 | down |
| Rabl4          | 0.043970857 | 1.565464973 | up   |
| Atf7ip         | 0.043970857 | 1.804197907 | down |
| scl0003067.1_7 | 0.044005249 | 1.54697609  | up   |
| Rnf138         | 0.044037737 | 1.682035804 | down |
| AA408296       | 0.044098403 | 1.650300622 | up   |
| Krt15          | 0.044098403 | 2.829380751 | up   |
| Pick1          | 0.044107813 | 1.694794178 | up   |
| Msx3           | 0.044146866 | 1.967513681 | down |
| 2700029M09Rik  | 0.044247638 | 1.626795292 | down |
| Rrn3           | 0.044271417 | 3.851872683 | down |
| 1110018J18Rik  | 0.044272628 | 1.635349631 | up   |
| Acad10         | 0.044272628 | 1.52994895  | up   |
| Ndufa1         | 0.04427458  | 1.566951275 | down |
| Zfp385c        | 0.044319805 | 1.506323218 | up   |
| Ift172         | 0.044405732 | 1.681596756 | up   |
| BC027246       | 0.044415895 | 1.611726522 | up   |
| Dhcr24         | 0.044462081 | 2.892962456 | down |
| Pld4           | 0.044481047 | 1.522917628 | up   |
| LOC100047016   | 0.044486493 | 1.649328709 | up   |
| Ndn            | 0.044486646 | 1.609985113 | down |
| Nol4           | 0.044508033 | 1.791897178 | down |
| Cacybp         | 0.044573195 | 4.869083405 | down |
| Tmem178        | 0.044591058 | 2.772071838 | down |
| Tor2a          | 0.04463543  | 1.541945696 | down |
| Prr11          | 0.04472002  | 1.541226268 | up   |
| Emp1           | 0.04474083  | 1.530421853 | up   |
| Atp5b          | 0.044746712 | 1.504917979 | up   |
| LOC666053      | 0.044756111 | 1.688090444 | down |
| Ctps           | 0.044756111 | 1.560593605 | up   |
| D930005D10Rik  | 0.044756111 | 1.521612406 | up   |
| Schip1         | 0.044815421 | 2.091172457 | down |
| Irx2           | 0.044840399 | 1.736776829 | up   |
| E030040G24Rik  | 0.044840477 | 1.937999964 | up   |
| 2610024G14Rik  | 0.044884946 | 1.685945988 | up   |
| EG665378       | 0.044904415 | 1.609692335 | down |
| Ints3          | 0.044907905 | 1.585018158 | up   |
| 2510002D24Rik  | 0.044909865 | 1.503829598 | up   |
| Hs1bp3         | 0.044947673 | 1.551209569 | up   |
| Panx1          | 0.044952855 | 1.931941986 | down |

|               |             |             |      |
|---------------|-------------|-------------|------|
| Polr2a        | 0.044968978 | 1.547062993 | down |
| 1810022O10Rik | 0.045012709 | 1.613938093 | down |
| Efna4         | 0.045035712 | 1.507464409 | up   |
| Clk2          | 0.045119248 | 1.571323037 | up   |
| Zfp191        | 0.045119248 | 1.782525182 | up   |
| Spc25         | 0.045134753 | 2.297004461 | down |
| Tyw1          | 0.045142017 | 1.65341568  | up   |
| EG624866      | 0.045186788 | 1.574350119 | up   |
| BC003993      | 0.04519375  | 1.595288634 | up   |
| D330001F17Rik | 0.04519375  | 1.682675123 | up   |
| 2610019N13Rik | 0.045205791 | 1.504050016 | down |
| Fdxr          | 0.045205791 | 1.51813817  | up   |
| 6430550H21Rik | 0.045233809 | 2.900570869 | down |
| Bmp1          | 0.045236804 | 1.995870352 | up   |
| Psmc9         | 0.045311436 | 1.72971046  | down |
| Kat5          | 0.045313828 | 1.622348547 | up   |
| 1700011J10Rik | 0.04532906  | 1.705316782 | down |
| Sdf2          | 0.04532906  | 1.542481661 | up   |
| B930044G13Rik | 0.04532906  | 1.75112772  | down |
| Pde6d         | 0.04532906  | 1.674471498 | up   |
| Kif21b        | 0.045335036 | 4.306611061 | down |
| Tsr1          | 0.045367807 | 2.420409441 | down |
| Rbbp7         | 0.045383625 | 1.951814175 | up   |
| Arhgap8       | 0.045383625 | 1.514266491 | up   |
| Yap1          | 0.04554674  | 1.573176146 | up   |
| Pole3         | 0.045608342 | 1.514801145 | up   |
| Jak1          | 0.045614041 | 1.616309404 | up   |
| Tfrc          | 0.045631029 | 1.614941835 | up   |
| Efna4         | 0.045632884 | 2.024995565 | up   |
| C430048L16Rik | 0.045650616 | 2.14329505  | down |
| Ung           | 0.045652077 | 1.714624524 | up   |
| H2afy2        | 0.045685496 | 1.901653528 | up   |
| C230004L04    | 0.045686554 | 2.225656748 | down |
| Kctd20        | 0.045686554 | 1.829118729 | up   |
| Tmed10        | 0.045686554 | 1.824732423 | up   |
| Mtmr12        | 0.045686554 | 2.528917551 | down |
| Lrrc45        | 0.045701459 | 1.674571872 | up   |
| Eps8          | 0.045701459 | 1.565937281 | up   |
| Asph          | 0.045701459 | 1.518949151 | up   |
| Ccna2         | 0.045707922 | 1.643437266 | down |
| 2010004N17Rik | 0.045716822 | 1.539157748 | up   |
| Med11         | 0.045950092 | 1.523451805 | up   |
| Cyr61         | 0.045953054 | 2.024758816 | down |
| Brd4          | 0.045968633 | 1.697463751 | up   |
| Nbr1          | 0.04599157  | 1.665898562 | up   |
| Dnd1          | 0.045991756 | 1.53112495  | up   |
| LOC100043527  | 0.046030201 | 3.223002672 | down |
| Camk2n1       | 0.046030201 | 1.771095872 | down |

|               |             |             |      |
|---------------|-------------|-------------|------|
| Prosapip1     | 0.046052773 | 1.565313458 | up   |
| Cyba          | 0.046149857 | 1.730954647 | up   |
| Zfp397        | 0.046176747 | 1.554591537 | up   |
| Nudt2         | 0.046181265 | 1.64345181  | up   |
| Cited2        | 0.046197835 | 1.539243817 | down |
| Bglap2        | 0.046206947 | 1.561390162 | up   |
| Gtf3a         | 0.046245862 | 1.86926043  | up   |
| Spg21         | 0.046265062 | 1.709075213 | up   |
| Cep110        | 0.04628763  | 1.570485711 | down |
| Ergic3        | 0.04628763  | 1.748751283 | up   |
| Trmt1         | 0.046318419 | 1.576895714 | up   |
| Dhx38         | 0.046330575 | 1.535974026 | up   |
| Csda          | 0.046330575 | 3.899050474 | down |
| Sorbs1        | 0.046397738 | 3.83799386  | down |
| Fh1           | 0.046397738 | 4.688094139 | down |
| B930095G10Rik | 0.046473369 | 1.629758835 | up   |
| D130027K14Rik | 0.046473369 | 1.526666641 | down |
| Prelp         | 0.046514008 | 1.568042874 | down |
| Fxr2          | 0.046559513 | 2.407452345 | down |
| Dgcr2         | 0.046614908 | 1.579515696 | up   |
| Abcd3         | 0.04667072  | 1.503739834 | up   |
| Epha4         | 0.046758242 | 1.533346653 | up   |
| Cald1         | 0.046800658 | 2.376091242 | down |
| Gli3          | 0.046828698 | 1.722111464 | up   |
| Smarce1       | 0.046829943 | 1.618265748 | up   |
| Psg23         | 0.046869643 | 1.703472614 | down |
| Cyr61         | 0.046914451 | 1.985097051 | down |
| Rnf20         | 0.046938404 | 2.823944092 | down |
| Coq9          | 0.04694929  | 1.583897233 | up   |
| Ghitm         | 0.046957102 | 2.268934965 | down |
| Zfp639        | 0.046985906 | 1.605192184 | down |
| 1110033C18Rik | 0.046996091 | 1.509202838 | up   |
| Ncapg2        | 0.046996091 | 2.070360184 | down |
| 6030458C11Rik | 0.047014143 | 2.817769766 | down |
| Mageh1        | 0.047040835 | 1.528167605 | up   |
| Agap1         | 0.047097869 | 1.561980009 | down |
| Asxl1         | 0.047188308 | 3.117561579 | down |
| LOC632667     | 0.047188308 | 2.608660936 | down |
| 1700052N19Rik | 0.047188308 | 1.691929579 | up   |
| Gp5           | 0.047213323 | 2.465470791 | down |
| Zc3h13        | 0.047225397 | 1.66297245  | down |
| Gsk3b         | 0.047235537 | 1.857083082 | down |
| 1200003C05Rik | 0.047253672 | 1.604827762 | down |
| LOC100039751  | 0.047264375 | 5.133409023 | down |
| Uchl5         | 0.047422584 | 3.453968525 | down |
| Gnaq          | 0.047436904 | 2.459468603 | down |
| Qsox1         | 0.047464076 | 1.525249481 | up   |
| Ncaph2        | 0.047464076 | 1.565834999 | up   |

|               |             |             |      |
|---------------|-------------|-------------|------|
| Cln6          | 0.047464076 | 1.633901715 | up   |
| 5830415L20Rik | 0.047464076 | 3.780449867 | down |
| Aspm          | 0.047514413 | 2.961087942 | down |
| Bbs1          | 0.047522485 | 1.576906443 | up   |
| Mrgprg        | 0.04758421  | 1.512146831 | up   |
| Garnl1        | 0.04758421  | 2.604614258 | down |
| 1300006C19Rik | 0.047614522 | 1.657463312 | up   |
| Bmyc          | 0.047614522 | 2.085510254 | down |
| Bcl11b        | 0.0476331   | 1.591125727 | down |
| 1110031B06Rik | 0.047673501 | 1.709198117 | up   |
| Armcx6        | 0.047698923 | 1.572029233 | up   |
| Epm2aip1      | 0.047698923 | 5.14840889  | down |
| Zdhhc15       | 0.047760572 | 1.61785531  | up   |
| Ahctf1        | 0.047765739 | 1.875687957 | down |
| Yipf6         | 0.047791574 | 1.623640895 | up   |
| 9430052C07Rik | 0.047795691 | 2.694894314 | down |
| Exoc7         | 0.047805186 | 1.881109238 | down |
| Trem1         | 0.047830489 | 2.249850988 | down |
| Mrpl44        | 0.04784672  | 1.56663239  | up   |
| Lypla1        | 0.047851659 | 1.651063442 | up   |
| Psmc6         | 0.047880087 | 2.955043793 | down |
| 1110007L15Rik | 0.04790986  | 1.5016464   | up   |
| Tial1         | 0.04795358  | 2.964385033 | down |
| Nfu1          | 0.047986947 | 2.798967123 | down |
| 8030402P03Rik | 0.047986947 | 1.679128289 | down |
| Dnajb9        | 0.04810521  | 4.439086437 | down |
| 6720456B07Rik | 0.048186306 | 1.556939125 | up   |
| Sep-15        | 0.048253268 | 1.571727395 | up   |
| Tox3          | 0.048272651 | 5.636298657 | down |
| Rfc4          | 0.04834811  | 2.769906998 | down |
| Drbp1         | 0.04842443  | 2.473812103 | down |
| Smek1         | 0.048454452 | 3.159136534 | down |
| Wdr60         | 0.048558105 | 1.820384145 | down |
| Capzb         | 0.048681296 | 1.548209906 | up   |
| Unc45a        | 0.048742175 | 1.914470673 | up   |
| Inpp1         | 0.048769519 | 1.53313446  | up   |
| Map1lc3b      | 0.04877251  | 5.538018704 | down |
| Pdlim7        | 0.04877251  | 1.598556638 | up   |
| Tmem25        | 0.048773546 | 1.80103612  | up   |
| Luc7l2        | 0.048800197 | 2.829208851 | down |
| LOC100043209  | 0.048826642 | 1.657682061 | down |
| Ube2n         | 0.048871927 | 3.194690466 | down |
| LOC381561     | 0.048917007 | 2.65517807  | down |
| Gmps          | 0.048948206 | 1.572574258 | down |
| Upf3a         | 0.048987888 | 1.775831699 | up   |
| Sfrs12ip1     | 0.048987888 | 1.824899554 | down |
| B3gat3        | 0.049001496 | 1.655320168 | up   |
| Trim59        | 0.049037885 | 3.624661446 | down |

|               |             |             |      |
|---------------|-------------|-------------|------|
| LOC433955     | 0.049045999 | 1.868902803 | down |
| LOC672274     | 0.049047958 | 7.474191189 | down |
| Hectd3        | 0.04905716  | 2.102703333 | down |
| Rxrb          | 0.049133807 | 1.510391116 | up   |
| E2f5          | 0.049141314 | 1.763564467 | down |
| Mxi1          | 0.049173378 | 4.718586445 | down |
| Irgq          | 0.049189415 | 1.544440866 | down |
| Akr7a5        | 0.049189415 | 1.557494283 | up   |
| Pla2g12a      | 0.049227577 | 1.516431689 | up   |
| Thoc1         | 0.049227577 | 1.621263027 | up   |
| Srpx          | 0.049241252 | 2.213653088 | up   |
| Cdyl          | 0.049255759 | 1.588329315 | up   |
| Efha1         | 0.049387131 | 1.696015954 | up   |
| Map4k4        | 0.049401984 | 1.657858253 | down |
| Ugt1a10       | 0.049403165 | 1.688376308 | up   |
| 1200003I07Rik | 0.049482178 | 1.600456357 | down |
| Spag9         | 0.049519125 | 2.197977543 | down |
| Rangrf        | 0.049601477 | 1.659832597 | up   |
| Kif23         | 0.049606953 | 2.474379063 | down |
| Tagln2        | 0.049606953 | 1.654120445 | up   |
| 2310003C23Rik | 0.049721658 | 1.868865371 | up   |
| LOC386082     | 0.049725164 | 2.323030949 | down |
| Slc25a33      | 0.049727015 | 1.513374448 | up   |
| Bbs2          | 0.049759805 | 1.559252262 | down |
| St3gal5       | 0.049773734 | 1.786075234 | up   |
| D2Wsu81e      | 0.049792573 | 1.653146982 | up   |
| Prpsap2       | 0.049874988 | 4.381533623 | down |
| Tarbp2        | 0.049915534 | 1.526001215 | up   |
| Phka2         | 0.049941957 | 1.565676451 | up   |
| Sas           | 0.049945593 | 1.506925583 | up   |
| Rab21         | 0.04996042  | 1.559420466 | up   |
| Prpf38a       | 0.049970407 | 2.950079203 | down |
| Mcl1          | 0.049976468 | 1.694028497 | down |
| Dhrs7b        | 0.049980972 | 1.625535369 | up   |
| Elavl2        | 0.049980972 | 2.052917719 | down |
|               |             |             |      |

Table S1 Sox9 (123 Pages)

| Symbol         | Corrected p-value | FCAbsolute  | Regulation |
|----------------|-------------------|-------------|------------|
| Snurf          | 2.43E-07          | 16.28224373 | down       |
| Snurf          | 2.57E-07          | 10.4280653  | down       |
| Ahcyl1         | 2.88E-07          | 2.944601536 | down       |
| G3bp1          | 5.99E-07          | 17.03670883 | down       |
| Sqle           | 5.99E-07          | 11.19085312 | down       |
| Cttn           | 9.85E-07          | 5.365588188 | down       |
| Mela           | 9.85E-07          | 193.5155029 | up         |
| Atp6v1a        | 9.94E-07          | 11.08010292 | down       |
| Btg1           | 9.94E-07          | 16.80504227 | down       |
| Klh19          | 9.94E-07          | 5.711296558 | down       |
| Barx1          | 1.03E-06          | 5.78196907  | down       |
| Clic4          | 1.03E-06          | 4.74880743  | down       |
| Mia1           | 1.03E-06          | 12.40242386 | down       |
| Ogn            | 1.03E-06          | 8.761684418 | down       |
| Pea15a         | 1.03E-06          | 7.083482742 | down       |
| Fcer1g         | 0.000001069       | 6.75583458  | up         |
| LOC381215      | 0.000001069       | 3.708198786 | up         |
| scl000963.1_12 | 0.000001069       | 27.45366478 | down       |
| Sh3glb1        | 0.000001069       | 1.921491623 | up         |
| Tpm3           | 0.000001069       | 12.23949337 | down       |
| Wdr45l         | 1.08E-06          | 3.462718725 | down       |
| Fgfr3          | 1.16E-06          | 5.09095192  | down       |
| LOC209281      | 1.16E-06          | 7.462760925 | down       |
| Rbm6           | 1.16E-06          | 3.783868313 | down       |
| D10Ert610e     | 1.24E-06          | 4.498394013 | down       |
| Mela           | 1.24E-06          | 7.264508247 | up         |
| Rnf14          | 1.24E-06          | 3.462059498 | down       |
| 9626100_15     | 1.25E-06          | 8.96787262  | up         |
| Angpt1         | 1.25E-06          | 3.246338844 | down       |
| LOC224732      | 1.25E-06          | 4.148701668 | down       |
| Calu           | 1.48E-06          | 13.70756626 | down       |
| LOC546090      | 1.55E-06          | 8.179782867 | down       |
| Pmp22          | 1.55E-06          | 12.38402176 | down       |
| Matn4          | 1.62E-06          | 25.97351456 | down       |
| Rab9           | 1.66E-06          | 3.348532677 | down       |
| Ctbp2          | 1.76E-06          | 6.877697468 | down       |
| Xlr3a          | 1.96E-06          | 5.381691933 | up         |
| LOC269859      | 1.97E-06          | 9.448865891 | down       |
| Prkar2b        | 1.97E-06          | 2.270573378 | down       |
| Recql          | 1.97E-06          | 2.369452715 | down       |
| Sec23a         | 1.97E-06          | 11.70175171 | down       |
| 2310008I22Rik  | 2.00E-06          | 3.89390111  | down       |
| 2310035C23Rik  | 2.00E-06          | 2.845045567 | down       |
| 2810438F06Rik  | 2.00E-06          | 2.042603016 | up         |
| Atp6ap2        | 2.00E-06          | 6.724124908 | down       |
| Clic4          | 2.00E-06          | 3.674860239 | down       |
| Cugbp1         | 2.00E-06          | 4.875402927 | down       |
| Cxadr          | 2.00E-06          | 2.025967121 | down       |
| E130306F01Rik  | 2.00E-06          | 5.990415573 | down       |
| lfi27          | 2.00E-06          | 4.797798157 | up         |
| Kdelr2         | 2.00E-06          | 8.655071259 | down       |

|                |          |             |      |
|----------------|----------|-------------|------|
| LOC333331      | 2.00E-06 | 5.009912491 | down |
| Mapk1          | 2.00E-06 | 5.47116375  | down |
| Mest           | 2.00E-06 | 8.560221672 | down |
| scl0001905.1_3 | 2.00E-06 | 10.18041611 | down |
| Sec61a2        | 2.00E-06 | 7.059074402 | down |
| Wrnip1         | 2.00E-06 | 4.550052166 | down |
| Cthrc1         | 2.08E-06 | 7.363954544 | down |
| Elp2           | 2.08E-06 | 9.949894905 | down |
| 9626953_200    | 2.12E-06 | 5.303401947 | up   |
| Atp6ap2        | 2.12E-06 | 6.21543026  | down |
| Eef2           | 2.12E-06 | 11.13695908 | down |
| Scin           | 2.12E-06 | 11.84676552 | down |
| Spop           | 2.15E-06 | 1.968521237 | up   |
| Xist           | 2.15E-06 | 4.769120216 | up   |
| LOC100047353   | 2.16E-06 | 16.09091377 | down |
| Tpm4           | 2.19E-06 | 11.63345242 | down |
| Zfp467         | 2.19E-06 | 1.528747797 | up   |
| Hspd1          | 2.26E-06 | 26.63630295 | down |
| LOC623031      | 2.26E-06 | 8.619883537 | down |
| Tmed2          | 2.26E-06 | 15.25777626 | down |
| Trappc5        | 2.26E-06 | 2.098404884 | up   |
| 2310022M17Rik  | 2.33E-06 | 5.095258713 | down |
| Gdi2           | 2.46E-06 | 11.7765274  | down |
| B130052P14Rik  | 2.59E-06 | 2.191059828 | up   |
| 2700088M07Rik  | 2.60E-06 | 4.098806858 | up   |
| 1700021K14Rik  | 2.67E-06 | 1.773165345 | up   |
| Dars           | 2.71E-06 | 8.645347595 | down |
| Smc2           | 2.71E-06 | 2.254477501 | down |
| Atl2           | 2.84E-06 | 3.026691914 | down |
| Bmi1           | 2.84E-06 | 7.92621088  | down |
| lft122         | 2.84E-06 | 2.446288109 | up   |
| Nrp            | 2.84E-06 | 3.627279997 | up   |
| Rab12          | 2.84E-06 | 3.008924007 | down |
| Sfrs12         | 2.84E-06 | 2.5010252   | down |
| Tpm4           | 2.84E-06 | 5.901847839 | down |
| Sox10          | 2.85E-06 | 6.190069199 | down |
| Tatdn3         | 2.90E-06 | 2.010156393 | up   |
| Efr3a          | 2.98E-06 | 3.849843025 | down |
| Cdc45l         | 3.09E-06 | 5.877048492 | down |
| Has2           | 3.09E-06 | 2.12053895  | down |
| Pus10          | 3.09E-06 | 3.560310125 | down |
| Minpp1         | 3.12E-06 | 7.255403996 | down |
| Msh2           | 3.14E-06 | 1.977584004 | up   |
| LOC100047252   | 3.15E-06 | 9.643625259 | down |
| LOC672474      | 3.15E-06 | 2.250611305 | up   |
| D7Ertd715e     | 3.18E-06 | 6.354035378 | down |
| Tcp1           | 3.27E-06 | 10.78222847 | down |
| Ube2v1         | 3.27E-06 | 3.053926945 | down |
| AW822216       | 3.40E-06 | 2.000539064 | up   |
| E430024F02Rik  | 3.42E-06 | 2.296355009 | down |
| Mboat2         | 3.42E-06 | 4.328363895 | down |
| Smox           | 3.42E-06 | 4.023831844 | down |



|               |             |             |      |
|---------------|-------------|-------------|------|
| Rab1b         | 3.43E-06    | 4.572256565 | down |
| 2310014G06Rik | 3.43E-06    | 3.220025778 | down |
| Calu          | 3.43E-06    | 5.714842796 | down |
| EG623867      | 0.000003518 | 11.96581936 | down |
| Asb3          | 3.57E-06    | 7.99809885  | down |
| Slc4a1        | 3.63E-06    | 6.088127136 | up   |
| 1700029J07Rik | 3.67E-06    | 2.406618357 | up   |
| Mtdh          | 3.67E-06    | 1.778023362 | down |
| Plxna4        | 3.68E-06    | 4.854547024 | up   |
| Akap1         | 3.76E-06    | 2.008526325 | down |
| Herpud2       | 3.76E-06    | 3.54115653  | down |
| Psmc2         | 3.76E-06    | 6.272919178 | down |
| Rab6          | 3.76E-06    | 13.71080399 | down |
| Ptcd2         | 3.77E-06    | 4.998456478 | down |
| Akap2         | 3.77E-06    | 5.325752258 | down |
| Btbd2         | 0.000003773 | 4.857840061 | down |
| LOC100044314  | 0.000003773 | 4.464912415 | up   |
| Tmpo          | 0.000003773 | 4.254616261 | down |
| Aif1          | 3.90E-06    | 4.060036659 | up   |
| Cldn5         | 3.90E-06    | 4.535059929 | up   |
| LOC100048832  | 3.90E-06    | 6.488455296 | down |
| 9626100_224   | 3.94E-06    | 21.01912117 | up   |
| Usp8          | 4.03E-06    | 3.155760288 | down |
| Trim23        | 4.08E-06    | 3.059520483 | down |
| Tram1         | 4.13E-06    | 9.069438934 | down |
| H2afy2        | 4.13E-06    | 8.006081581 | down |
| 9626962_229   | 4.15E-06    | 4.103837967 | up   |
| Ptpn12        | 4.16E-06    | 5.469593525 | down |
| 1300006C19Rik | 4.30E-06    | 3.872225285 | down |
| 4732415M23Rik | 4.30E-06    | 1.610247612 | up   |
| Atad2         | 4.30E-06    | 2.804745674 | down |
| LOC100039786  | 4.30E-06    | 5.608729363 | down |
| LOC100046775  | 4.30E-06    | 5.361951351 | down |
| Nxf1          | 4.30E-06    | 3.640837431 | down |
| P4ha3         | 4.65E-06    | 2.543177605 | down |
| Rnf167        | 4.65E-06    | 2.689976931 | down |
| Tmem49        | 4.65E-06    | 3.617798567 | down |
| Rec8          | 4.67E-06    | 6.115628243 | up   |
| Slc35b2       | 4.67E-06    | 5.981288433 | down |
| Cd53          | 4.76E-06    | 6.751580238 | up   |
| Rnf13         | 0.0000048   | 5.99867487  | down |
| Cstf3         | 4.91E-06    | 2.267512322 | down |
| LOC333744     | 0.000004997 | 7.278337956 | down |
| Ppap2b        | 0.000004997 | 4.089593887 | down |
| Armc8         | 5.04E-06    | 5.477164745 | down |
| 9626958_317   | 5.13E-06    | 10.43560219 | up   |
| A930019L04Rik | 5.13E-06    | 2.81422925  | up   |
| Unc119b       | 5.13E-06    | 3.685203075 | down |
| Jarid1d       | 5.18E-06    | 4.988981724 | up   |
| LOC213411     | 5.24E-06    | 18.34956932 | down |
| Gli3          | 5.60E-06    | 3.173316717 | down |
| Eef2          | 5.62E-06    | 12.79270744 | down |

|                |             |             |      |
|----------------|-------------|-------------|------|
| Vps16          | 5.67E-06    | 3.360454083 | down |
| Gdpd3          | 5.68E-06    | 2.35029006  | up   |
| Gtf3c6         | 5.74E-06    | 1.66050005  | up   |
| LOC269365      | 5.74E-06    | 2.545342684 | up   |
| Srm            | 5.74E-06    | 8.38906765  | down |
| Ubqln1         | 5.74E-06    | 3.357088804 | down |
| Nup155         | 5.75E-06    | 2.335738897 | down |
| Rnf4           | 6.01E-06    | 5.546492577 | down |
| Rnf8           | 6.12E-06    | 3.67894268  | down |
| Papss2         | 6.25E-06    | 6.537036419 | down |
| Tmem214        | 6.28E-06    | 2.80851984  | down |
| 9626962_211_rc | 0.000006281 | 13.76020813 | up   |
| Tmem49         | 6.42E-06    | 5.131297112 | down |
| Grid2          | 0.000006474 | 2.567212582 | up   |
| Col9a1         | 6.49E-06    | 19.59921646 | down |
| Hsd11b2        | 6.49E-06    | 2.732875347 | up   |
| Tank           | 6.49E-06    | 1.960616708 | down |
| Pou3f4         | 6.58E-06    | 2.28909874  | down |
| LOC380888      | 6.60E-06    | 2.474255323 | down |
| Snx2           | 6.60E-06    | 5.240269661 | down |
| Prpsap2        | 6.84E-06    | 2.040724993 | down |
| LOC667609      | 6.87E-06    | 2.895514965 | down |
| Dbc1           | 6.89E-06    | 3.628328562 | up   |
| Hmgcr          | 6.89E-06    | 3.791461468 | down |
| Hsp90ab1       | 6.92E-06    | 5.004231453 | down |
| Slc25a36       | 6.94E-06    | 5.999230862 | down |
| 1110004P21Rik  | 7.19E-06    | 3.858745813 | down |
| Ola1           | 7.21E-06    | 4.827047825 | down |
| Zfp558         | 7.21E-06    | 1.616594911 | down |
| LOC100045971   | 7.23E-06    | 2.366033077 | down |
| Csnk1g2        | 0.000007409 | 3.149769068 | down |
| Col6a3         | 7.47E-06    | 1.872129917 | down |
| Hoxa11s        | 7.52E-06    | 3.320790768 | up   |
| Tmed4          | 7.56E-06    | 5.147822857 | down |
| 1110038B12Rik  | 7.58E-06    | 2.310216904 | down |
| Gorasp2        | 7.59E-06    | 5.674937725 | down |
| Elovl1         | 0.000007712 | 3.125793219 | down |
| Maea           | 0.000007712 | 4.912212849 | down |
| Xrcc6          | 0.000007712 | 5.7110672   | down |
| Prelp          | 7.95E-06    | 11.84494877 | down |
| Ubqln1         | 7.95E-06    | 2.729489088 | down |
| Cdk2           | 7.96E-06    | 5.984936714 | down |
| LOC100044622   | 8.01E-06    | 6.554626942 | down |
| Ccnyl1         | 8.03E-06    | 3.299476624 | down |
| BC038881       | 8.07E-06    | 1.766301632 | up   |
| Hdhd2          | 8.13E-06    | 4.419561386 | down |
| Oc90           | 8.13E-06    | 4.306143761 | down |
| Tmed7          | 8.13E-06    | 7.199827671 | down |
| Itm2a          | 8.44E-06    | 20.30648041 | down |
| Plxnd1         | 8.49E-06    | 2.984797239 | up   |
| 1700065O13Rik  | 8.54E-06    | 2.390968323 | down |
| Aifm1          | 8.54E-06    | 3.607730627 | down |

|               |             |             |      |
|---------------|-------------|-------------|------|
| Got2          | 8.54E-06    | 6.931339741 | down |
| Rbbp7         | 8.54E-06    | 17.42933273 | down |
| Gmppa         | 0.000008692 | 4.846647263 | down |
| 1200015F23Rik | 8.85E-06    | 2.735702276 | down |
| C78339        | 8.85E-06    | 2.311928272 | down |
| Ncoa4         | 8.85E-06    | 3.41334939  | down |
| 9230108I15Rik | 8.95E-06    | 2.198386192 | up   |
| Slc37a3       | 9.05E-06    | 2.924352408 | down |
| Adk           | 9.09E-06    | 3.20015502  | down |
| 9626096_327   | 9.15E-06    | 5.376810551 | up   |
| Shisa5        | 9.15E-06    | 2.831512213 | down |
| Ap1s1         | 9.23E-06    | 3.702727556 | down |
| A830080H07Rik | 9.24E-06    | 1.565250874 | up   |
| Vps41         | 9.24E-06    | 3.322981596 | down |
| 9629514_325   | 9.47E-06    | 5.342110634 | up   |
| Igfbp3        | 9.52E-06    | 5.452507973 | down |
| Mtmr14        | 9.69E-06    | 2.83305788  | down |
| Tollip        | 9.75E-06    | 3.288922787 | down |
| Kbtbd7        | 9.88E-06    | 3.826936007 | down |
| Zdhhc13       | 9.88E-06    | 2.961416245 | down |
| Gnpda1        | 1.00E-05    | 3.111648083 | down |
| Insig1        | 1.00E-05    | 3.88476634  | down |
| Cryz          | 1.02E-05    | 4.563667297 | down |
| 4921504I02Rik | 0.000010238 | 4.941533566 | up   |
| Frmd6         | 0.000010238 | 1.692186475 | up   |
| Rbpjl         | 0.000010238 | 2.951968432 | down |
| 1300014I06Rik | 0.000010243 | 2.328416109 | down |
| Sct           | 0.000010243 | 2.291469574 | up   |
| LOC100047915  | 1.05E-05    | 4.770830631 | down |
| Acan          | 1.08E-05    | 6.213802338 | down |
| Syradb        | 1.08E-05    | 2.403548241 | down |
| LOC100047696  | 1.11E-05    | 4.953800678 | down |
| Scp2          | 1.11E-05    | 2.886713743 | down |
| Pja1          | 1.11E-05    | 2.872586489 | down |
| Slc44a2       | 1.11E-05    | 2.969364405 | down |
| Hpcal1        | 1.12E-05    | 1.939287782 | down |
| Prei4         | 1.12E-05    | 2.491890669 | down |
| St3gal6       | 1.12E-05    | 2.495745421 | down |
| Wwp2          | 1.12E-05    | 5.120452404 | down |
| Exoc4         | 1.12E-05    | 1.859408855 | down |
| Ibtk          | 1.12E-05    | 2.420808315 | down |
| Tpm3          | 1.12E-05    | 4.65392971  | down |
| Asah1         | 1.13E-05    | 6.742412567 | down |
| Cep57         | 1.13E-05    | 4.318086147 | down |
| Prosc         | 1.13E-05    | 4.061861992 | down |
| EG623133      | 1.14E-05    | 3.179880858 | down |
| Mkrn3         | 0.00001142  | 6.613668442 | down |
| 2700089E24Rik | 0.000011457 | 3.30083251  | down |
| Rbbp7         | 1.17E-05    | 15.93036461 | down |
| 9630025I21Rik | 1.17E-05    | 1.767906904 | up   |
| Msr3          | 1.17E-05    | 2.706700563 | down |
| Atf4          | 1.18E-05    | 3.893290997 | down |

|               |             |             |      |
|---------------|-------------|-------------|------|
| Col11a1       | 1.18E-05    | 3.070882559 | down |
| Efha1         | 1.18E-05    | 3.982237577 | down |
| Ppp2r2a       | 1.18E-05    | 6.375761509 | down |
| 2410014A08Rik | 1.18E-05    | 2.083367586 | down |
| Vars          | 1.19E-05    | 1.957713485 | down |
| Etnk1         | 1.23E-05    | 3.267770767 | down |
| Stk3          | 0.00001239  | 4.311697006 | down |
| Mia3          | 1.25E-05    | 3.627288818 | down |
| Acan          | 1.26E-05    | 3.726875544 | down |
| 4933411D12Rik | 0.000012829 | 3.839246273 | up   |
| Trem1         | 0.000012829 | 3.888500691 | up   |
| Umps          | 0.000012829 | 7.797474861 | down |
| Cul4a         | 1.30E-05    | 3.606418371 | down |
| Prnpip1       | 1.30E-05    | 4.535410404 | down |
| 4930504E06Rik | 1.30E-05    | 2.830984354 | down |
| Actc1         | 1.30E-05    | 2.089511871 | up   |
| Alas2         | 1.30E-05    | 3.438703537 | up   |
| LOC100044411  | 1.30E-05    | 6.985604286 | down |
| Ndrp2         | 1.30E-05    | 2.594526529 | down |
| Paip2b        | 1.30E-05    | 4.85147047  | down |
| Pecam1        | 1.30E-05    | 4.577373505 | up   |
| LOC100045081  | 1.30E-05    | 3.047186613 | down |
| LOC100047759  | 1.30E-05    | 1.631498098 | down |
| Kih19         | 1.30E-05    | 5.928988457 | down |
| 2010004N17Rik | 1.34E-05    | 2.486142159 | down |
| 4933433P14Rik | 1.37E-05    | 2.907008886 | down |
| Ctnn          | 1.37E-05    | 3.056124687 | down |
| Nt5c2         | 1.38E-05    | 4.751771927 | down |
| Mtch1         | 1.38E-05    | 7.152193546 | down |
| Mtbp          | 1.40E-05    | 3.607527256 | down |
| Acat3         | 1.40E-05    | 7.240067959 | down |
| Caprin2       | 1.40E-05    | 2.33762145  | down |
| Chmp2a        | 1.40E-05    | 2.305363894 | down |
| Cyp51         | 1.40E-05    | 3.651641369 | down |
| LOC674427     | 1.40E-05    | 2.086430073 | down |
| 9930021J03Rik | 1.41E-05    | 1.895258188 | up   |
| LOC100048832  | 1.41E-05    | 1.708787084 | down |
| Ppm1b         | 1.41E-05    | 2.718099833 | down |
| Mpzl1         | 1.42E-05    | 2.614463806 | down |
| Zfp449        | 1.42E-05    | 2.853039026 | down |
| Apaf1         | 1.43E-05    | 4.611181736 | down |
| LOC225468     | 1.43E-05    | 2.575030565 | up   |
| Rbm6          | 1.44E-05    | 2.153254986 | down |
| Xpnpep1       | 1.44E-05    | 5.149816513 | down |
| Atg2a         | 1.45E-05    | 2.390595436 | up   |
| 4930511J11Rik | 1.45E-05    | 3.008134604 | up   |
| Rgs3          | 1.45E-05    | 1.874791026 | down |
| Ptx3          | 1.45E-05    | 2.150045157 | down |
| Ccne2         | 1.48E-05    | 4.694009304 | down |
| Chd3          | 1.50E-05    | 3.354319334 | up   |
| Rab7          | 1.50E-05    | 4.727404594 | down |
| Skp2          | 1.55E-05    | 9.29180336  | down |

|                 |             |             |      |
|-----------------|-------------|-------------|------|
| Crtap           | 1.55E-05    | 3.247110605 | down |
| D8Erttd82e      | 1.55E-05    | 2.100708962 | up   |
| Myo9b           | 1.56E-05    | 2.652628422 | up   |
| Rnf167          | 1.56E-05    | 3.185821533 | down |
| Spin            | 1.58E-05    | 3.923149109 | down |
| Etv1            | 1.58E-05    | 4.297760963 | down |
| Asb4            | 1.59E-05    | 3.994550705 | down |
| LOC100046320    | 1.59E-05    | 6.290267944 | down |
| Calu            | 1.60E-05    | 5.472316742 | down |
| Lin28b          | 1.60E-05    | 2.55594039  | up   |
| Chmp7           | 1.60E-05    | 2.793775082 | down |
| D0Kist3         | 1.60E-05    | 2.104086399 | up   |
| Etv1            | 1.60E-05    | 3.938217402 | down |
| lah1            | 1.60E-05    | 1.688607693 | up   |
| Kars            | 1.61E-05    | 5.208313942 | down |
| LOC434200       | 1.61E-05    | 4.22437048  | down |
| Rabl3           | 1.61E-05    | 3.038547039 | down |
| 2600002B07Rik   | 1.63E-05    | 2.618479013 | up   |
| Mat2a           | 1.63E-05    | 5.996403217 | down |
| scl0002130.1_20 | 1.63E-05    | 3.74867034  | down |
| Ptbp2           | 1.63E-05    | 2.011176109 | down |
| Hadh            | 1.64E-05    | 5.792607307 | down |
| Gse1            | 1.65E-05    | 1.679089785 | up   |
| Mospd1          | 1.65E-05    | 4.566000938 | down |
| scl0004085.1_27 | 1.65E-05    | 4.085368633 | down |
| Prei4           | 1.65E-05    | 2.493928909 | down |
| Krit1           | 1.67E-05    | 3.371637583 | down |
| Spcs3           | 1.67E-05    | 4.002120495 | down |
| Adam11          | 1.67E-05    | 1.94789505  | up   |
| Fndc3a          | 1.67E-05    | 3.297939777 | down |
| Papss2          | 1.67E-05    | 3.08749795  | down |
| Tarsl2          | 1.67E-05    | 2.547206879 | down |
| Rab23           | 1.68E-05    | 4.180167198 | down |
| Mospd1          | 1.68E-05    | 3.877674341 | down |
| Vps26a          | 1.68E-05    | 2.7923069   | down |
| Napa            | 1.69E-05    | 4.319627285 | down |
| Tsc22d1         | 1.69E-05    | 2.117260933 | down |
| 0610007P14Rik   | 1.73E-05    | 8.547762871 | down |
| EG633692        | 1.73E-05    | 6.53498745  | down |
| Tyro3           | 1.73E-05    | 2.08830595  | up   |
| Alg6            | 1.74E-05    | 2.485656261 | down |
| Bri3bp          | 1.74E-05    | 1.567324281 | down |
| Snai3           | 1.74E-05    | 2.162145853 | up   |
| Asxl2           | 1.74E-05    | 2.471994638 | up   |
| Cacna1g         | 1.74E-05    | 2.106597185 | up   |
| Zfp811          | 1.74E-05    | 2.148871183 | up   |
| Fkbp1a          | 1.75E-05    | 1.817640781 | down |
| LOC100046136    | 0.000017593 | 12.50759029 | down |
| Mical1          | 1.77E-05    | 2.097376823 | up   |
| Cops7a          | 1.80E-05    | 2.400217056 | down |
| B3galnt2        | 1.80E-05    | 5.006847858 | down |
| Snx14           | 1.80E-05    | 3.882187605 | down |

|               |             |             |      |
|---------------|-------------|-------------|------|
| Extl1         | 1.81E-05    | 3.756691933 | down |
| LOC433749     | 1.81E-05    | 4.241154671 | down |
| Zfp422-rs1    | 1.81E-05    | 6.653063297 | down |
| EG384596      | 1.82E-05    | 2.411724091 | up   |
| Pcmt1         | 1.82E-05    | 4.647210121 | down |
| 4931428F04Rik | 1.83E-05    | 1.665858388 | up   |
| Bst2          | 1.83E-05    | 3.539474964 | up   |
| LOC545208     | 1.83E-05    | 10.7373724  | down |
| Dock6         | 1.83E-05    | 2.06994915  | up   |
| 1110057K04Rik | 0.000018377 | 3.0881989   | down |
| 2610015J01Rik | 0.000018377 | 2.612410307 | down |
| 9230111I22Rik | 0.000018377 | 3.087126017 | up   |
| Ipmk          | 0.000018377 | 1.925785184 | down |
| Car10         | 1.84E-05    | 1.700924516 | up   |
| Pfn1          | 1.84E-05    | 2.536902905 | down |
| Tssc1         | 1.84E-05    | 4.981688023 | down |
| Bmpr1a        | 1.84E-05    | 4.158643246 | down |
| 2410014A08Rik | 1.84E-05    | 2.12929678  | down |
| 4930503L19Rik | 1.84E-05    | 4.866831303 | down |
| Gpr125        | 1.84E-05    | 2.239007235 | down |
| Fbxl12        | 1.85E-05    | 2.775398493 | down |
| 4933433P14Rik | 1.88E-05    | 2.382874727 | down |
| C030002B11Rik | 1.88E-05    | 1.840402603 | up   |
| Mpeg1         | 1.88E-05    | 12.81386948 | up   |
| BC002199      | 1.89E-05    | 3.518777847 | down |
| Tmem9b        | 1.89E-05    | 2.921584129 | down |
| Sep-10        | 1.89E-05    | 1.895076871 | down |
| 2410003P15Rik | 1.89E-05    | 3.252454758 | down |
| Acvr1b        | 1.89E-05    | 2.186805487 | down |
| Ctgf          | 1.89E-05    | 4.026652813 | down |
| Fstl1         | 1.91E-05    | 30.46147919 | down |
| Myo1b         | 1.91E-05    | 2.122879982 | down |
| Mkks          | 1.91E-05    | 2.561979294 | down |
| Snx27         | 1.92E-05    | 1.875513554 | down |
| 4833426H15Rik | 1.92E-05    | 2.979052544 | down |
| Wapal         | 1.92E-05    | 2.248007536 | down |
| Crebbp        | 1.92E-05    | 2.316209078 | up   |
| Necap1        | 1.92E-05    | 3.76947999  | down |
| Kat5          | 1.93E-05    | 2.21811986  | down |
| Tgoln1        | 1.94E-05    | 2.579447985 | down |
| Wnt5a         | 1.94E-05    | 3.874965906 | down |
| Islr          | 1.96E-05    | 17.02267647 | down |
| Acot7         | 1.96E-05    | 4.576246262 | down |
| Clint1        | 1.97E-05    | 3.635176659 | down |
| Col27a1       | 1.99E-05    | 4.319157124 | down |
| Amotl1        | 1.99E-05    | 2.031495333 | up   |
| Tmem51        | 2.01E-05    | 1.853325009 | up   |
| Nupl1         | 2.01E-05    | 2.275214911 | down |
| Slc31a1       | 2.03E-05    | 2.899451971 | down |
| Bnip2         | 2.04E-05    | 2.457861662 | down |
| Chka          | 2.04E-05    | 1.859719396 | up   |
| Foxred1       | 2.04E-05    | 3.15153718  | down |

|               |             |             |      |
|---------------|-------------|-------------|------|
| Glt8d2        | 2.04E-05    | 1.654757619 | down |
| Ube2q2        | 2.04E-05    | 3.231334448 | down |
| Snrk          | 2.04E-05    | 2.067819834 | down |
| Tmed2         | 2.05E-05    | 9.661296845 | down |
| Unc119b       | 2.05E-05    | 4.320408344 | down |
| Lrrk2         | 2.05E-05    | 1.88201201  | up   |
| Kcns1         | 2.06E-05    | 2.092708826 | down |
| Tnfrsf11b     | 2.06E-05    | 2.316004276 | down |
| A830029A02Rik | 2.09E-05    | 3.166808128 | up   |
| Map4k5        | 2.09E-05    | 1.932198763 | down |
| Acd           | 2.13E-05    | 2.198358774 | down |
| Clec4n        | 2.13E-05    | 8.130173683 | up   |
| Chpt1         | 2.14E-05    | 3.158918142 | down |
| C430010C01    | 0.000021497 | 2.339282036 | up   |
| Atg9a         | 2.16E-05    | 2.526178122 | up   |
| Bdh1          | 2.16E-05    | 2.179454565 | down |
| LOC380906     | 2.17E-05    | 4.781121254 | up   |
| Trip6         | 2.17E-05    | 1.987746    | down |
| Gnal          | 2.18E-05    | 2.386161327 | down |
| Gnpda1        | 2.18E-05    | 2.365849018 | down |
| Hyal2         | 2.18E-05    | 6.069654942 | down |
| I7Rn6         | 2.18E-05    | 2.182899237 | down |
| Mboat2        | 2.18E-05    | 4.121282101 | down |
| Slc25a30      | 2.18E-05    | 2.348610163 | down |
| Tbc1d14       | 2.18E-05    | 3.995583773 | down |
| Uros          | 2.18E-05    | 3.532380581 | down |
| Ergic3        | 2.19E-05    | 5.783002853 | down |
| EG623818      | 2.19E-05    | 1.969997287 | down |
| Gpr108        | 2.19E-05    | 2.545031309 | down |
| LOC382050     | 2.19E-05    | 1.687505722 | up   |
| Mgl1          | 2.20E-05    | 5.579555512 | up   |
| LOC382237     | 2.20E-05    | 1.810676694 | up   |
| Polr1c        | 2.20E-05    | 1.782086372 | up   |
| Tmpo          | 2.21E-05    | 5.473426819 | down |
| Arf5          | 2.23E-05    | 3.409604311 | down |
| Arfgap1       | 2.23E-05    | 4.403191567 | down |
| Heca          | 2.23E-05    | 1.8897264   | down |
| Thbs1         | 2.23E-05    | 5.464723587 | down |
| Tmtc4         | 2.23E-05    | 2.423789501 | down |
| LOC100043982  | 2.25E-05    | 3.860621214 | up   |
| Mtmt2         | 2.25E-05    | 3.86826539  | down |
| E330018D03Rik | 2.26E-05    | 1.895284414 | up   |
| LOC633016     | 2.26E-05    | 21.21012306 | down |
| Smpd13b       | 2.26E-05    | 1.969936967 | down |
| Ptpn12        | 2.27E-05    | 3.96179533  | down |
| Anks3         | 2.28E-05    | 3.442865372 | down |
| Csde1         | 2.28E-05    | 6.921939373 | down |
| LOC100045963  | 0.000022956 | 1.98790288  | down |
| LOC382262     | 2.31E-05    | 2.096614361 | down |
| Col14a1       | 2.32E-05    | 2.242420435 | down |
| Osbpl1a       | 2.33E-05    | 1.919828653 | down |
| Wars          | 0.00002363  | 3.663579941 | down |

|                 |             |             |      |
|-----------------|-------------|-------------|------|
| Wisp1           | 2.37E-05    | 2.730303288 | down |
| 1110012F10Rik   | 2.38E-05    | 1.65092063  | up   |
| Gatad1          | 2.40E-05    | 2.695825577 | down |
| Rab7            | 2.40E-05    | 3.20967865  | down |
| Sec22a          | 2.40E-05    | 5.233076572 | down |
| Slc46a3         | 2.40E-05    | 1.976843119 | up   |
| Tmed4           | 2.40E-05    | 3.844161034 | down |
| Trub1           | 2.40E-05    | 2.430801392 | down |
| 1500002C15Rik   | 2.41E-05    | 1.634621263 | down |
| LOC383775       | 2.41E-05    | 3.01973486  | up   |
| Ndn             | 2.42E-05    | 5.251294136 | down |
| Cd109           | 2.44E-05    | 1.82360971  | down |
| Unc119b         | 2.44E-05    | 2.544879913 | down |
| Gatc            | 2.45E-05    | 3.157745838 | down |
| Mar-07          | 2.48E-05    | 4.280188084 | down |
| D030041N04Rik   | 2.48E-05    | 2.50186491  | up   |
| Tep1            | 2.48E-05    | 2.25101471  | up   |
| 2510002D24Rik   | 2.49E-05    | 2.415004015 | down |
| 4932441P04Rik   | 2.49E-05    | 1.885864019 | up   |
| G630097J24Rik   | 2.49E-05    | 1.787307024 | up   |
| Klhl10          | 2.49E-05    | 2.165116549 | up   |
| LOC627317       | 2.49E-05    | 2.867682695 | up   |
| Hnrnpd          | 2.49E-05    | 2.492981672 | up   |
| Paip1           | 2.49E-05    | 5.300552368 | down |
| A730008H23Rik   | 2.49E-05    | 2.572934628 | down |
| Gnas            | 2.49E-05    | 6.219718933 | down |
| Pdia5           | 2.49E-05    | 2.353853941 | down |
| Wnk3            | 2.52E-05    | 1.740400434 | down |
| LOC218060       | 2.53E-05    | 3.266451836 | up   |
| Cep120          | 2.55E-05    | 2.166876555 | up   |
| Eraf            | 2.58E-05    | 3.987465382 | up   |
| Nol3            | 2.58E-05    | 3.042418957 | up   |
| scl00065.1_3086 | 2.59E-05    | 2.145645142 | up   |
| Man2b1          | 2.61E-05    | 3.427057982 | up   |
| Metap2          | 2.61E-05    | 4.677306652 | down |
| Psmc5           | 2.61E-05    | 3.978257418 | down |
| Ranbp3          | 2.61E-05    | 2.679462671 | down |
| Lepre1          | 2.62E-05    | 3.086449862 | down |
| scl000408.1_6   | 2.62E-05    | 4.554535866 | down |
| Tubgcp3         | 2.63E-05    | 2.060122728 | up   |
| Ggcx            | 2.64E-05    | 1.750491977 | down |
| Otud1           | 2.64E-05    | 1.665085912 | down |
| Klk8            | 2.65E-05    | 3.280446053 | up   |
| LOC100047009    | 2.65E-05    | 3.624681234 | down |
| EG668300        | 2.65E-05    | 3.491343498 | up   |
| LOC100045864    | 2.66E-05    | 3.138421059 | up   |
| Tmtc4           | 2.66E-05    | 2.443422556 | down |
| 5730446D14Rik   | 2.69E-05    | 2.450055122 | up   |
| Ruvbl1          | 2.69E-05    | 6.580038548 | down |
| scl000215.1_14  | 2.71E-05    | 2.171081305 | down |
| LOC381468       | 0.000027511 | 2.32368803  | down |
| Zfp326          | 0.000027511 | 2.246153832 | up   |



|                 |             |             |      |
|-----------------|-------------|-------------|------|
| 9830166E18Rik   | 2.75E-05    | 4.97649765  | up   |
| Zfp110          | 2.75E-05    | 2.602319241 | down |
| 2700060E02Rik   | 2.77E-05    | 4.437078953 | down |
| 2700086A05Rik   | 2.78E-05    | 2.162735224 | up   |
| Serpina3n       | 2.78E-05    | 1.593630314 | down |
| Capzb           | 2.79E-05    | 2.569545031 | down |
| Zfp276          | 2.79E-05    | 1.735865235 | up   |
| Cyth4           | 2.80E-05    | 9.690379143 | up   |
| Anapc5          | 2.80E-05    | 5.241995812 | down |
| Cnpy3           | 2.80E-05    | 2.935933113 | down |
| 1700024K14Rik   | 2.81E-05    | 1.537546992 | up   |
| Rangap1         | 2.81E-05    | 3.907580376 | down |
| Myl4            | 2.81E-05    | 2.878082514 | up   |
| Sdc1            | 2.81E-05    | 3.508153439 | down |
| Gpr108          | 2.81E-05    | 1.836807251 | down |
| LOC432730       | 0.000028144 | 3.928883314 | down |
| E230020D15Rik   | 2.82E-05    | 3.314997673 | up   |
| Prkar2b         | 2.83E-05    | 1.900593281 | down |
| Adk             | 2.83E-05    | 6.292619705 | down |
| C80879          | 2.83E-05    | 1.891337514 | up   |
| Nsdhl           | 2.83E-05    | 4.994202614 | down |
| Thbs1           | 2.84E-05    | 5.315876007 | down |
| Traf7           | 2.84E-05    | 2.057048321 | up   |
| Ctss            | 2.84E-05    | 7.732981682 | up   |
| LOC382091       | 2.84E-05    | 2.05813098  | down |
| Lpar2           | 2.84E-05    | 2.406290531 | up   |
| Psip1           | 2.84E-05    | 5.23514986  | down |
| Hp              | 2.85E-05    | 1.688666344 | up   |
| LOC100038993    | 2.85E-05    | 3.241112471 | down |
| Ctsa            | 2.86E-05    | 3.247160435 | down |
| Csnk1e          | 2.86E-05    | 2.344733954 | down |
| Usp1            | 2.87E-05    | 2.713627338 | down |
| Atp5l           | 2.87E-05    | 1.816922784 | down |
| Pcnt            | 2.88E-05    | 1.886447549 | up   |
| scl0002906.1_58 | 2.88E-05    | 3.952043057 | down |
| Tmed4           | 2.88E-05    | 4.630799294 | down |
| Tpi1            | 2.88E-05    | 4.450827122 | down |
| Gtpbp10         | 2.91E-05    | 4.138234615 | down |
| Clns1a          | 2.92E-05    | 5.645679951 | down |
| 9530068E07Rik   | 2.93E-05    | 3.322604418 | down |
| Slmap           | 2.93E-05    | 3.331158161 | down |
| Slc35b3         | 2.95E-05    | 3.153701067 | down |
| Cdc37l1         | 2.95E-05    | 2.378768444 | down |
| Nfatc3          | 2.96E-05    | 2.062367678 | up   |
| Pnpla8          | 2.97E-05    | 3.094823122 | down |
| Sec62           | 2.97E-05    | 2.038259029 | up   |
| B4galt3         | 2.97E-05    | 2.832778454 | down |
| LOC545750       | 2.97E-05    | 2.744885922 | down |
| Mat2a           | 2.97E-05    | 11.0291481  | down |
| Slc38a2         | 2.97E-05    | 1.672430515 | up   |
| Ptpra           | 2.99E-05    | 1.886648774 | up   |
| scl0001487.1_50 | 2.99E-05    | 5.337049484 | down |

|               |             |             |      |
|---------------|-------------|-------------|------|
| LOC100046025  | 3.01E-05    | 3.741459608 | down |
| Smarcc1       | 3.01E-05    | 1.68176949  | down |
| LOC667005     | 3.01E-05    | 9.028515816 | down |
| Arl13b        | 3.03E-05    | 2.598559856 | down |
| Tyw1          | 3.05E-05    | 2.425904274 | up   |
| Mlx           | 3.05E-05    | 2.359501362 | up   |
| Fhl1          | 3.05E-05    | 1.621378303 | down |
| Golt1b        | 3.05E-05    | 2.930775166 | down |
| Cmtm5         | 3.09E-05    | 4.380111694 | down |
| Wipi1         | 3.09E-05    | 3.950438023 | down |
| LOC667269     | 0.000030934 | 2.614979267 | up   |
| Trappc3       | 3.11E-05    | 5.257313252 | down |
| LOC226486     | 3.13E-05    | 3.338392019 | down |
| Wdr82         | 3.14E-05    | 5.608211517 | down |
| Alox5ap       | 3.16E-05    | 2.468556643 | up   |
| Mtap1b        | 3.17E-05    | 1.969672322 | down |
| Hapln1        | 3.19E-05    | 6.735909462 | down |
| Mrpl53        | 3.19E-05    | 2.2627213   | down |
| Atp6v1c1      | 0.000032318 | 1.885682225 | down |
| Dchs1         | 3.24E-05    | 3.529207468 | up   |
| Nt5dc3        | 3.25E-05    | 2.013053179 | down |
| Insig1        | 3.31E-05    | 3.23274374  | down |
| Atg2a         | 3.33E-05    | 2.355898142 | up   |
| Ctdsp2        | 3.33E-05    | 2.632240772 | up   |
| Drg1          | 3.33E-05    | 4.585217953 | down |
| LOC100046087  | 3.33E-05    | 5.201648712 | up   |
| 3110047M12Rik | 3.34E-05    | 3.145421982 | down |
| AI593442      | 3.35E-05    | 2.21384573  | up   |
| Ccnc          | 3.35E-05    | 2.133722782 | down |
| Elovl1        | 3.35E-05    | 2.906730413 | down |
| Gabarapl2     | 3.35E-05    | 3.902710199 | up   |
| Khdrbs1       | 3.35E-05    | 3.750445128 | down |
| Ms4a6c        | 3.35E-05    | 1.980038524 | up   |
| S100a9        | 3.35E-05    | 2.608605862 | up   |
| Myef2         | 3.36E-05    | 4.044755459 | down |
| B3gnt8        | 3.37E-05    | 1.630660534 | up   |
| EG382843      | 3.37E-05    | 1.865279794 | up   |
| E2f6          | 3.38E-05    | 3.362100363 | down |
| Mbnl1         | 3.38E-05    | 1.567408085 | down |
| Exoc1         | 3.39E-05    | 2.457518816 | down |
| Sgk3          | 0.000034189 | 2.827445507 | down |
| Pex11c        | 3.42E-05    | 1.514232874 | up   |
| Clk4          | 3.43E-05    | 11.9104557  | down |
| 1300018117Rik | 3.43E-05    | 2.145716429 | up   |
| Aspscr1       | 3.47E-05    | 1.595929027 | down |
| Tnc           | 3.47E-05    | 1.869061589 | down |
| Adra2a        | 3.48E-05    | 2.713639736 | up   |
| D10Ert610e    | 3.50E-05    | 4.690755367 | down |
| LOC674888     | 3.50E-05    | 1.599556923 | up   |
| Pgam2         | 3.50E-05    | 3.395617724 | up   |
| Dok1          | 3.52E-05    | 2.811432123 | down |
| LOC380637     | 3.52E-05    | 2.693228722 | up   |

|                 |             |             |      |
|-----------------|-------------|-------------|------|
| Ms4a6d          | 3.53E-05    | 9.758406639 | up   |
| LOC382061       | 0.000035331 | 2.40476656  | up   |
| Wdr45l          | 0.000035331 | 3.310341358 | down |
| Plekhg5         | 0.000035504 | 2.338508606 | up   |
| A830007P12Rik   | 3.55E-05    | 2.419266701 | up   |
| Zc3hc1          | 0.000035933 | 4.774459839 | down |
| Flot1           | 3.60E-05    | 2.07884407  | down |
| Rc3h2           | 3.60E-05    | 1.902869225 | up   |
| Cd9             | 3.62E-05    | 2.94108367  | down |
| LOC100048526    | 3.62E-05    | 1.679495454 | up   |
| Ranbp3          | 3.62E-05    | 3.120012283 | down |
| Parp12          | 3.67E-05    | 1.8640939   | up   |
| 2610101N10Rik   | 3.68E-05    | 5.288698196 | down |
| Edg8            | 3.68E-05    | 1.852172494 | down |
| Mtmr2           | 3.68E-05    | 4.74108696  | down |
| P2ry1           | 3.68E-05    | 2.169948816 | down |
| Akap12          | 3.71E-05    | 1.613247156 | down |
| EG229879        | 3.71E-05    | 1.767364025 | up   |
| Sumo3           | 3.71E-05    | 7.512158871 | down |
| Tle2            | 3.71E-05    | 2.872522831 | up   |
| BC030863        | 3.72E-05    | 2.173691511 | up   |
| Fcgr4           | 3.73E-05    | 5.048808575 | up   |
| D330001F17Rik   | 3.73E-05    | 1.832918167 | up   |
| scl0002124.1_39 | 3.73E-05    | 1.514492869 | down |
| LOC381996       | 3.75E-05    | 2.130673409 | down |
| Trmu            | 3.75E-05    | 2.42283392  | down |
| Srd5a3          | 3.81E-05    | 2.024572849 | down |
| 3930401E15Rik   | 3.84E-05    | 3.820165634 | down |
| Prkd2           | 3.84E-05    | 2.045428753 | up   |
| 5730508B09Rik   | 0.000038552 | 2.213041544 | down |
| Ptx3            | 0.00003861  | 2.430686712 | down |
| Snx24           | 0.00003861  | 1.611333132 | down |
| 2010205J10Rik   | 3.86E-05    | 2.520755291 | up   |
| A230106M15Rik   | 3.88E-05    | 2.823865414 | up   |
| 5730453I16Rik   | 3.88E-05    | 3.522815466 | down |
| LOC627985       | 3.89E-05    | 2.091299772 | down |
| Rab6            | 3.89E-05    | 4.517389774 | down |
| Arnt            | 0.000039093 | 2.264725447 | up   |
| Ppm1a           | 3.92E-05    | 4.354636669 | down |
| LOC100043209    | 3.93E-05    | 2.027000427 | down |
| Rfc2            | 3.95E-05    | 2.749675274 | down |
| Sec24d          | 3.95E-05    | 3.02913022  | down |
| Anapc1          | 3.96E-05    | 1.925601721 | up   |
| Glr3            | 3.96E-05    | 1.531902909 | up   |
| Npr3            | 3.96E-05    | 2.042585135 | down |
| Rock2           | 3.96E-05    | 2.284775257 | down |
| C130066G14Rik   | 0.000039703 | 1.663102508 | up   |
| Cluap1          | 3.98E-05    | 2.32538867  | down |
| 9830167H18Rik   | 3.98E-05    | 1.837395668 | down |
| Naca            | 0.000040091 | 4.634916306 | down |
| AU020206        | 4.01E-05    | 2.06699872  | up   |
| C1qa            | 4.01E-05    | 6.321131229 | up   |

|                 |             |             |      |
|-----------------|-------------|-------------|------|
| 2610202C22Rik   | 0.000040234 | 2.063946009 | up   |
| Nfkbia          | 4.04E-05    | 2.009624243 | up   |
| Sgk3            | 4.05E-05    | 2.786330223 | down |
| Gnas            | 4.05E-05    | 5.683738709 | down |
| C130086J11Rik   | 4.06E-05    | 1.635486603 | up   |
| Zc3h14          | 4.06E-05    | 4.442071915 | down |
| Bfar            | 4.12E-05    | 3.680678129 | down |
| Hectd2          | 4.12E-05    | 1.818490744 | down |
| Lypla1          | 4.12E-05    | 4.616435051 | down |
| Smarca4         | 4.12E-05    | 2.639749765 | up   |
| Uhrf2           | 4.12E-05    | 5.452251911 | down |
| Prg4            | 4.13E-05    | 1.597024322 | down |
| Sfrs10          | 4.14E-05    | 12.64330864 | down |
| Asph            | 0.00004143  | 2.169843674 | down |
| Fn1             | 0.00004143  | 3.997449637 | down |
| Nubp2           | 0.00004143  | 2.860342741 | down |
| Chd1l           | 4.15E-05    | 1.556504011 | down |
| Moxd1           | 4.15E-05    | 3.239943504 | down |
| 2810408A11Rik   | 0.000041518 | 2.954569817 | up   |
| Bex1            | 0.000041518 | 1.90403223  | up   |
| Lrrfip2         | 0.000041518 | 2.232184649 | down |
| Zfp592          | 0.000041518 | 1.821945787 | up   |
| Fyco1           | 4.15E-05    | 1.911411285 | up   |
| Mfap2           | 4.15E-05    | 3.709034443 | down |
| Igf2bp2         | 4.17E-05    | 1.925333619 | down |
| 2410042D21Rik   | 4.19E-05    | 3.766563654 | down |
| Al480653        | 4.19E-05    | 1.903862119 | down |
| Csnk2a2         | 4.19E-05    | 1.895500898 | up   |
| Obsl1           | 4.19E-05    | 1.735131741 | up   |
| Thyn1           | 4.19E-05    | 1.776072979 | up   |
| Tox             | 4.19E-05    | 4.584356308 | down |
| scl0001419.1_32 | 0.000042008 | 2.267399073 | down |
| Matn4           | 4.25E-05    | 21.17943192 | down |
| LOC100039227    | 4.25E-05    | 1.774461389 | down |
| Tsc22d1         | 4.27E-05    | 16.97862816 | down |
| D7Ertd715e      | 4.28E-05    | 2.690426111 | down |
| Ppp1cc          | 4.29E-05    | 3.024160624 | down |
| 1190002N15Rik   | 4.29E-05    | 4.486179829 | down |
| Bptf            | 4.29E-05    | 3.892836094 | up   |
| Alg3            | 4.32E-05    | 1.955567122 | down |
| Ddx26b          | 4.32E-05    | 2.138787985 | down |
| 9030625A04Rik   | 4.33E-05    | 2.277412415 | down |
| 1700030C10Rik   | 4.36E-05    | 2.162940025 | up   |
| Gna12           | 4.37E-05    | 2.485063076 | down |
| Myo1e           | 4.37E-05    | 2.609994412 | up   |
| 9430088P09Rik   | 4.38E-05    | 2.260219574 | down |
| B230339C08Rik   | 4.38E-05    | 2.283774853 | up   |
| C8b             | 4.38E-05    | 3.325871229 | down |
| Dcn             | 4.38E-05    | 6.7773633   | down |
| Dedd2           | 4.38E-05    | 1.955394745 | up   |
| Gtpbp10         | 4.38E-05    | 3.97743988  | down |
| Polh            | 4.38E-05    | 2.805636644 | down |

|               |             |             |      |
|---------------|-------------|-------------|------|
| Camk1g        | 4.42E-05    | 2.216525078 | down |
| BC005764      | 4.46E-05    | 2.138457537 | up   |
| Tbxas1        | 4.47E-05    | 6.862919331 | up   |
| S100a8        | 4.49E-05    | 2.954621077 | up   |
| Al848100      | 4.50E-05    | 3.528762817 | down |
| Cep170        | 4.50E-05    | 2.833632231 | down |
| Rps6kb1       | 4.50E-05    | 2.721683979 | down |
| Ednra         | 0.000045378 | 1.612930536 | up   |
| Fem1c         | 0.000045378 | 1.696869135 | down |
| LOC269251     | 0.000045378 | 2.250858784 | up   |
| Tes           | 0.000045378 | 5.683325291 | down |
| Ift140        | 4.58E-05    | 2.298628807 | up   |
| Saps3         | 4.58E-05    | 2.561685085 | up   |
| 2810401C09Rik | 4.58E-05    | 1.798041463 | up   |
| Ubr1          | 4.58E-05    | 2.174515486 | down |
| Smcx          | 4.60E-05    | 4.660027981 | up   |
| B3gnt9        | 4.62E-05    | 1.84432447  | up   |
| Sfxn2         | 4.62E-05    | 1.836755395 | down |
| Clasp2        | 4.63E-05    | 2.483433247 | down |
| Pex3          | 4.66E-05    | 2.427631855 | down |
| Baz2a         | 0.000046618 | 1.844004154 | up   |
| Nkx6-2        | 0.000046618 | 1.737278938 | up   |
| Tmem168       | 0.000046618 | 2.116677046 | down |
| E130014J05Rik | 4.69E-05    | 2.303111315 | up   |
| Sepx1         | 4.69E-05    | 2.113198042 | up   |
| Ccl3          | 4.70E-05    | 2.247771263 | up   |
| Cyp20a1       | 4.70E-05    | 2.879655123 | down |
| Zmynd11       | 4.71E-05    | 3.239306688 | down |
| Sfrs10        | 4.76E-05    | 22.50256729 | down |
| Slc12a4       | 4.80E-05    | 1.859230638 | up   |
| Ube2e1        | 4.80E-05    | 3.91310215  | down |
| Atxn7l3       | 4.81E-05    | 2.88219285  | up   |
| Nudt19        | 4.81E-05    | 3.006002665 | down |
| Bat4          | 4.84E-05    | 2.089825153 | down |
| Mpv17         | 0.000048466 | 2.256426573 | down |
| Mobkl3        | 4.86E-05    | 4.701019764 | down |
| Snx2          | 4.90E-05    | 6.765829086 | down |
| Fsd1          | 4.91E-05    | 1.707734466 | up   |
| Ttc9c         | 4.93E-05    | 2.534919977 | down |
| AK157302      | 4.94E-05    | 1.885556102 | down |
| Ccndbp1       | 4.94E-05    | 5.522270203 | down |
| Fgfr1op       | 4.94E-05    | 3.044998169 | down |
| LOC100047012  | 4.94E-05    | 6.42723465  | down |
| Tnrc6c        | 4.96E-05    | 1.789737582 | up   |
| B430305P08Rik | 4.97E-05    | 1.688486457 | up   |
| Icam2         | 4.97E-05    | 2.936601162 | up   |
| 1110007L15Rik | 4.97E-05    | 1.652600288 | down |
| Actn4         | 5.05E-05    | 2.610746384 | down |
| Tgif1         | 5.07E-05    | 3.366029501 | down |
| Acad8         | 0.000050798 | 3.806711912 | down |
| Naalad2       | 5.09E-05    | 2.319501638 | up   |
| 9430087C24Rik | 5.10E-05    | 2.248124361 | up   |

|               |             |             |      |
|---------------|-------------|-------------|------|
| Peci          | 5.10E-05    | 3.512191534 | up   |
| Tprgl         | 5.10E-05    | 3.196787596 | down |
| Brd2          | 5.11E-05    | 1.940654516 | down |
| Cbfb          | 5.11E-05    | 3.276631594 | down |
| Tbx1          | 5.11E-05    | 2.809188366 | up   |
| Ylpm1         | 5.11E-05    | 1.884726048 | up   |
| Brd8          | 5.12E-05    | 1.978004575 | down |
| Cdk8          | 5.17E-05    | 1.871616602 | down |
| Adcy7         | 5.21E-05    | 1.924390674 | up   |
| 1700041B20Rik | 5.27E-05    | 1.850744247 | down |
| Mr1           | 5.27E-05    | 2.353144884 | up   |
| Bsdc1         | 5.29E-05    | 2.169983625 | up   |
| E330011120Rik | 5.29E-05    | 3.363369465 | down |
| C330006D17Rik | 0.000052935 | 2.935462952 | up   |
| BC021381      | 5.31E-05    | 2.085487843 | up   |
| Mapk9         | 5.31E-05    | 4.267343521 | down |
| Mfsd11        | 5.31E-05    | 2.42723465  | down |
| C030040A22Rik | 5.32E-05    | 2.208784342 | up   |
| Ctbp1         | 5.32E-05    | 1.905156732 | up   |
| EG668830      | 5.32E-05    | 1.673520804 | up   |
| Sbno2         | 5.36E-05    | 1.640567541 | up   |
| LOC100047223  | 5.38E-05    | 2.176020622 | down |
| A330021D07Rik | 0.000054138 | 4.292908669 | down |
| Acot2         | 0.000054138 | 2.404225349 | down |
| Cln6          | 0.000054138 | 2.33219409  | up   |
| Epha3         | 0.000054138 | 4.076158524 | down |
| LOC100045882  | 0.000054138 | 1.634979725 | up   |
| LOC619973     | 0.000054138 | 2.362172365 | down |
| Mfsd2         | 0.000054138 | 2.035990238 | down |
| Pin1l         | 0.000054138 | 2.027514219 | up   |
| Rps4y2        | 0.000054138 | 2.743528128 | down |
| Sepp1         | 0.000054138 | 6.204881191 | up   |
| Ascc3l1       | 0.000054269 | 2.214868546 | up   |
| LOC100048313  | 0.000054269 | 1.877420306 | up   |
| Xpo4          | 0.000054269 | 2.114598036 | down |
| Cdc20         | 5.45E-05    | 6.218059063 | down |
| Stard9        | 5.46E-05    | 2.167569161 | up   |
| Mtap1s        | 5.47E-05    | 2.235272646 | up   |
| Zcchc3        | 5.47E-05    | 3.209930658 | down |
| Zfp1          | 5.48E-05    | 2.283190489 | up   |
| Eftud2        | 5.49E-05    | 1.82590878  | up   |
| Gtl3          | 5.50E-05    | 2.00747633  | up   |
| LOC639554     | 5.50E-05    | 2.82462883  | down |
| Melk          | 5.50E-05    | 3.728048325 | down |
| Rab18         | 5.50E-05    | 3.119390249 | down |
| Ctps2         | 5.52E-05    | 7.574419975 | down |
| E2f6          | 5.52E-05    | 3.237102509 | down |
| Pdcd5         | 5.52E-05    | 2.408194065 | down |
| Ranbp6        | 5.52E-05    | 2.431586504 | down |
| Rspry1        | 5.52E-05    | 2.347830057 | up   |
| A430088C08Rik | 5.54E-05    | 2.430822134 | up   |
| Pspc1         | 5.54E-05    | 1.834138274 | up   |

|                 |             |             |      |
|-----------------|-------------|-------------|------|
| Nsun5           | 5.57E-05    | 2.757062674 | down |
| Calcoco1        | 5.60E-05    | 2.164650917 | up   |
| Acad8           | 5.60E-05    | 3.208378077 | down |
| 8030401N12Rik   | 5.60E-05    | 1.867398381 | up   |
| Cbll1           | 5.61E-05    | 2.064683437 | up   |
| Rsrc2           | 5.61E-05    | 3.153092146 | down |
| Tnrc6c          | 5.62E-05    | 2.169309616 | up   |
| Wtap            | 5.62E-05    | 2.442561626 | up   |
| Skp2            | 5.62E-05    | 6.384583473 | down |
| Snap23          | 5.62E-05    | 2.974595785 | down |
| Gale            | 5.63E-05    | 3.049463987 | down |
| Hsd17b10        | 5.63E-05    | 2.501660109 | up   |
| Mrpl52          | 5.63E-05    | 2.060772419 | up   |
| Cdc37l1         | 5.64E-05    | 2.50075531  | down |
| Dynll2          | 5.64E-05    | 5.332748413 | down |
| Zdhhc1          | 5.64E-05    | 2.072454929 | up   |
| LOC100047936    | 0.000056458 | 1.831988096 | up   |
| Fcrls           | 5.65E-05    | 17.65731239 | up   |
| 4933407L23Rik   | 5.66E-05    | 2.682318687 | up   |
| Blvrb           | 5.66E-05    | 2.11733222  | up   |
| Ggcx            | 5.67E-05    | 2.449159384 | down |
| Nras            | 5.69E-05    | 2.501082182 | up   |
| Ndufs3          | 5.74E-05    | 3.196403027 | down |
| Dmxl1           | 5.74E-05    | 2.709820271 | down |
| M6pr            | 5.77E-05    | 2.128665686 | down |
| Fndc5           | 5.82E-05    | 2.160599947 | up   |
| 2700033B16Rik   | 5.84E-05    | 1.644810796 | up   |
| 9630032J03Rik   | 5.84E-05    | 1.774509311 | up   |
| Aytl2           | 5.86E-05    | 2.303926706 | up   |
| A930007F16Rik   | 5.86E-05    | 2.026841164 | up   |
| Fgf13           | 5.86E-05    | 2.250362873 | down |
| Rfxank          | 0.000059228 | 2.077599526 | up   |
| scl0002177.1_17 | 5.95E-05    | 1.711463332 | down |
| Dcn             | 5.96E-05    | 3.202011585 | down |
| Trpc4ap         | 6.00E-05    | 3.307366371 | down |
| C730026O12Rik   | 6.02E-05    | 1.731827378 | up   |
| LOC234360       | 6.03E-05    | 4.393483639 | down |
| LOC100047963    | 6.04E-05    | 2.117429018 | up   |
| Pak2            | 6.04E-05    | 2.433626175 | down |
| Srebf2          | 6.04E-05    | 2.878751755 | up   |
| 1810007M14Rik   | 0.000060634 | 3.691850185 | down |
| Bai2            | 0.000060634 | 2.246994257 | up   |
| Pdzd11          | 0.000060634 | 3.380865574 | down |
| Rabggtb         | 0.000060634 | 2.747635126 | down |
| 2610524N02Rik   | 0.000060671 | 2.638593197 | down |
| Ube2j2          | 0.000060671 | 2.159637451 | down |
| scl000171.1_4   | 6.09E-05    | 2.088298798 | down |
| Gorasp2         | 6.13E-05    | 3.213990212 | down |
| Ubl5            | 0.000061343 | 2.463537931 | down |
| D830012I16Rik   | 6.19E-05    | 3.561058521 | up   |
| Rab5b           | 6.20E-05    | 1.733808637 | down |
| Armc8           | 6.22E-05    | 3.523648739 | down |

|               |             |             |      |
|---------------|-------------|-------------|------|
| Fdx1l         | 6.23E-05    | 2.453845024 | up   |
| Gas5          | 6.25E-05    | 2.00115037  | down |
| 3110003A17Rik | 6.27E-05    | 3.366592646 | up   |
| LOC666025     | 6.27E-05    | 3.047303438 | down |
| Mrpl22        | 6.27E-05    | 1.610602021 | down |
| Pfkm          | 6.27E-05    | 4.260520458 | down |
| EG240110      | 6.31E-05    | 2.760208845 | up   |
| Tmem66        | 6.31E-05    | 5.062771797 | down |
| Psmc13        | 0.000063331 | 7.706672669 | down |
| Tgfbr1        | 0.000063331 | 3.13123703  | down |
| D930020N02Rik | 6.34E-05    | 2.03296566  | up   |
| 9830115L13Rik | 6.37E-05    | 1.775632381 | up   |
| Ccdc115       | 6.37E-05    | 3.826667309 | down |
| Usp22         | 6.37E-05    | 2.396869659 | down |
| Rab24         | 6.41E-05    | 2.46876359  | down |
| Capns1        | 6.42E-05    | 2.023786545 | down |
| Fech          | 6.42E-05    | 2.261281252 | down |
| Gm1818        | 6.42E-05    | 2.02170682  | down |
| LOC637353     | 0.000064277 | 4.044147015 | down |
| A230057E24Rik | 6.46E-05    | 1.669480562 | up   |
| Gch1          | 6.55E-05    | 1.952455998 | up   |
| LOC100041502  | 6.55E-05    | 2.512696981 | up   |
| Ndufv2        | 6.55E-05    | 3.21805501  | up   |
| Zdhhc17       | 6.57E-05    | 2.077921391 | down |
| Dok1          | 6.58E-05    | 2.928308487 | down |
| 2610019A05Rik | 6.59E-05    | 1.767435074 | up   |
| LOC100046623  | 6.59E-05    | 6.133660793 | down |
| Usf1          | 6.60E-05    | 2.526470423 | down |
| Rab11a        | 6.62E-05    | 3.261560679 | down |
| Lhfp          | 0.000066398 | 3.460046768 | down |
| Rab3il1       | 6.64E-05    | 1.988007069 | down |
| 1810055E12Rik | 6.65E-05    | 2.839559555 | down |
| Aif1          | 6.65E-05    | 5.361550808 | up   |
| LOC385699     | 6.65E-05    | 2.278853893 | up   |
| Nfatc3        | 6.65E-05    | 2.160465241 | up   |
| Klf15         | 6.65E-05    | 1.65427351  | down |
| Lama2         | 6.65E-05    | 1.813099623 | down |
| Trim56        | 6.65E-05    | 2.105467081 | up   |
| EG432466      | 6.67E-05    | 1.7499125   | down |
| Cyp4f13       | 6.67E-05    | 3.060883999 | up   |
| Gm266         | 6.67E-05    | 1.854758859 | down |
| 2310051N18Rik | 6.70E-05    | 2.077365875 | up   |
| Cops4         | 6.71E-05    | 4.254882813 | down |
| Pgls          | 6.71E-05    | 2.099420548 | up   |
| LOC100046322  | 6.72E-05    | 2.145213366 | down |
| 2610200G18Rik | 6.72E-05    | 2.339172602 | down |
| 2900034E22Rik | 6.72E-05    | 2.418410778 | up   |
| lvns1abp      | 6.72E-05    | 5.763780594 | down |
| Cnot2         | 6.75E-05    | 4.808637142 | down |
| D130060L11Rik | 6.75E-05    | 1.572817087 | up   |
| 2700029L08Rik | 6.78E-05    | 2.538516045 | up   |
| Cyp20a1       | 6.78E-05    | 3.088886023 | down |



|               |             |             |      |
|---------------|-------------|-------------|------|
| H2-T23        | 6.78E-05    | 1.710852146 | up   |
| Lrmp          | 6.78E-05    | 2.638993025 | up   |
| Agtr1a        | 6.80E-05    | 2.726255655 | down |
| Prkd3         | 6.80E-05    | 2.267865658 | down |
| Sqle          | 6.80E-05    | 1.627150297 | down |
| Tmpo          | 0.000068042 | 4.569718361 | down |
| D430030F08Rik | 6.82E-05    | 2.404030085 | up   |
| Eif4ebp3      | 0.000068255 | 1.983619571 | up   |
| Mtch2         | 6.83E-05    | 6.156559944 | down |
| Sulf2         | 6.83E-05    | 2.373995304 | up   |
| P2ry6         | 6.85E-05    | 6.581582546 | up   |
| Kat2b         | 6.86E-05    | 1.971818686 | down |
| Jrkl          | 6.86E-05    | 1.58117497  | down |
| A930015N15Rik | 6.88E-05    | 1.846510887 | up   |
| Decr1         | 6.88E-05    | 1.583391547 | up   |
| Net1          | 6.88E-05    | 9.44861126  | down |
| Fnbp4         | 6.88E-05    | 1.621601224 | down |
| 5033430I15Rik | 6.88E-05    | 1.874239564 | down |
| Cyba          | 6.88E-05    | 2.135558605 | up   |
| Tspan18       | 6.88E-05    | 2.772142649 | down |
| AI597468      | 6.95E-05    | 5.438621998 | down |
| Tmem38a       | 6.95E-05    | 2.349522114 | up   |
| Tsyp12        | 6.95E-05    | 1.621193528 | up   |
| C030038J10Rik | 6.96E-05    | 2.040082216 | down |
| Gnb1          | 6.96E-05    | 3.277168274 | down |
| Wdr32         | 6.96E-05    | 2.933605433 | down |
| B3galnt2      | 7.02E-05    | 2.113152027 | down |
| Foxred1       | 7.04E-05    | 2.010187388 | down |
| Ttc3          | 7.04E-05    | 3.968136787 | down |
| Emb           | 7.07E-05    | 1.961876035 | down |
| 4833425P12Rik | 7.10E-05    | 2.14288187  | up   |
| LOC100046898  | 7.10E-05    | 2.59269166  | down |
| Col2a1        | 7.11E-05    | 8.106253624 | down |
| Oprs1         | 7.11E-05    | 2.871074438 | down |
| Cr1l          | 7.15E-05    | 2.998526335 | down |
| Ap2b1         | 7.18E-05    | 1.683663964 | down |
| Crtc1         | 7.18E-05    | 2.469668865 | up   |
| 1110008J03Rik | 7.19E-05    | 2.30757618  | down |
| Inpp5b        | 7.20E-05    | 1.838120103 | up   |
| Mageh1        | 7.20E-05    | 7.174389839 | down |
| Tspan6        | 7.20E-05    | 3.439257383 | down |
| Flnb          | 7.25E-05    | 2.532634735 | down |
| Gpsn2         | 7.25E-05    | 2.485758781 | up   |
| scl000972.1_0 | 7.25E-05    | 2.047077894 | up   |
| 2410091C18Rik | 7.26E-05    | 2.369493246 | down |
| EG433643      | 7.27E-05    | 2.151795864 | down |
| Helz          | 7.27E-05    | 2.861902237 | up   |
| Hps1          | 7.27E-05    | 1.93018949  | up   |
| Snrpa         | 7.27E-05    | 8.081143379 | down |
| Grk5          | 7.28E-05    | 1.805803418 | down |
| Bcl2l12       | 7.29E-05    | 2.280676603 | down |
| Srgn          | 7.29E-05    | 2.236761332 | up   |

|                |             |             |      |
|----------------|-------------|-------------|------|
| Zfp143         | 7.30E-05    | 1.934387803 | down |
| LOC435912      | 7.30E-05    | 2.963234901 | up   |
| Myo9b          | 7.30E-05    | 2.22285223  | up   |
| scl0002064.1_2 | 7.30E-05    | 1.912297845 | down |
| Ankrd27        | 7.31E-05    | 2.332244158 | down |
| Snx5           | 7.31E-05    | 3.003176451 | up   |
| Ptpla          | 7.32E-05    | 1.919571996 | down |
| 3830432E14Rik  | 7.34E-05    | 3.032339573 | down |
| 9630027A13Rik  | 7.34E-05    | 2.050425291 | up   |
| Arfgap2        | 7.34E-05    | 2.030695438 | down |
| Dap3           | 7.34E-05    | 2.927265406 | down |
| Rars2          | 7.34E-05    | 2.62176156  | down |
| C230053E11Rik  | 7.35E-05    | 3.408675194 | up   |
| 2810407C02Rik  | 7.36E-05    | 3.824454069 | down |
| Mccc2          | 7.39E-05    | 2.450114727 | down |
| Wdr37          | 7.39E-05    | 2.707296133 | down |
| LOC100044363   | 0.000073919 | 1.934279084 | down |
| EG629383       | 0.000073934 | 4.711193562 | down |
| Wipi1          | 7.45E-05    | 2.793698072 | down |
| 2410005O16Rik  | 7.46E-05    | 1.85773778  | up   |
| 5330431K02Rik  | 7.46E-05    | 2.714342833 | up   |
| Scp2           | 7.46E-05    | 1.973301888 | down |
| Gabt1          | 7.51E-05    | 1.565253496 | up   |
| 4631416L12Rik  | 7.52E-05    | 2.325555563 | down |
| Gtf2h4         | 7.52E-05    | 1.802882552 | up   |
| scl0003749.1_1 | 7.54E-05    | 1.678581595 | down |
| 2700078E11Rik  | 7.56E-05    | 3.013702393 | down |
| Acaa2          | 7.56E-05    | 3.110505104 | down |
| Acadl          | 7.56E-05    | 3.582536697 | down |
| LOC100046650   | 7.56E-05    | 1.857588172 | down |
| Chi3l1         | 7.56E-05    | 2.813188076 | down |
| B930066N23Rik  | 7.58E-05    | 1.934273124 | down |
| Vasn           | 7.58E-05    | 1.751005173 | down |
| 0610037L13Rik  | 7.59E-05    | 2.36140585  | down |
| Thsd7b         | 7.60E-05    | 1.682179809 | up   |
| 5930404A08Rik  | 7.61E-05    | 1.807741284 | up   |
| Acsf3          | 7.61E-05    | 1.777652144 | up   |
| Rbm5           | 7.62E-05    | 3.300074101 | up   |
| 1110038G02Rik  | 7.63E-05    | 2.559972048 | down |
| 4833418A01Rik  | 7.65E-05    | 2.12139225  | down |
| Capn6          | 7.65E-05    | 2.12635541  | down |
| Dync1h1        | 7.65E-05    | 2.999501467 | up   |
| EG235855       | 7.65E-05    | 2.109173298 | down |
| Parp1          | 7.65E-05    | 3.559139729 | down |
| Psat1          | 7.65E-05    | 2.637450457 | down |
| Tcf12          | 7.65E-05    | 1.968023896 | down |
| Tjap1          | 7.65E-05    | 1.920527577 | up   |
| Ncoa4          | 7.66E-05    | 2.128906727 | down |
| Fgfr3          | 7.67E-05    | 1.774785996 | down |
| Lass2          | 7.67E-05    | 6.449664116 | down |
| LOC384836      | 7.68E-05    | 2.756736517 | up   |
| Foxp2          | 7.70E-05    | 2.867068768 | down |

|               |             |             |      |
|---------------|-------------|-------------|------|
| 6330403E01Rik | 0.000077601 | 2.119986773 | up   |
| Fut8          | 7.76E-05    | 1.797354579 | down |
| Slc30a5       | 7.76E-05    | 3.024980068 | down |
| Aldoc         | 7.79E-05    | 2.084366083 | down |
| E030024L06Rik | 7.79E-05    | 1.86097908  | up   |
| Nola2         | 7.79E-05    | 3.155969381 | down |
| Txndc5        | 7.79E-05    | 3.610878468 | down |
| Ctdsp1        | 7.83E-05    | 2.078402042 | up   |
| Ap4m1         | 7.85E-05    | 3.282339096 | down |
| Asph          | 7.85E-05    | 4.216923714 | down |
| BC030046      | 7.85E-05    | 1.69511807  | up   |
| LOC386027     | 7.85E-05    | 1.682624698 | up   |
| Upf1          | 7.85E-05    | 2.72619462  | up   |
| Sirt6         | 7.86E-05    | 2.145502091 | down |
| Laptm4b       | 7.89E-05    | 2.49363327  | up   |
| Xpot          | 0.00007928  | 2.980075121 | down |
| Ubt2          | 7.93E-05    | 2.986867905 | down |
| Srpk1         | 7.96E-05    | 1.775823593 | up   |
| D430006A07Rik | 8.01E-05    | 3.021985769 | up   |
| Notch3        | 8.02E-05    | 2.79549861  | up   |
| Git1          | 8.04E-05    | 1.942364931 | up   |
| Rif1          | 8.04E-05    | 2.512672663 | down |
| Rnf213        | 8.04E-05    | 3.163559914 | up   |
| LOC100047393  | 8.07E-05    | 3.321138144 | down |
| Fzr1          | 8.08E-05    | 1.616291642 | down |
| Bmp5          | 8.10E-05    | 1.953491926 | down |
| Tm6sf1        | 8.10E-05    | 2.098410606 | down |
| Tmem219       | 8.10E-05    | 1.66725719  | up   |
| Slco2b1       | 8.12E-05    | 8.74333477  | up   |
| Mks1          | 8.17E-05    | 1.736744881 | up   |
| Car3          | 8.17E-05    | 2.797692776 | down |
| Cyb5r4        | 8.17E-05    | 2.823809862 | down |
| Hsp90ab1      | 8.19E-05    | 3.361030817 | down |
| Gtpbp10       | 8.23E-05    | 2.405654192 | down |
| 4Cyt1         | 8.26E-05    | 12.69908905 | down |
| Dkc1          | 8.26E-05    | 1.835830331 | up   |
| Emr1          | 8.26E-05    | 15.34803867 | up   |
| Fin15         | 8.26E-05    | 3.364711523 | down |
| Narfl         | 8.26E-05    | 1.778761506 | down |
| Zfp827        | 8.26E-05    | 2.582318783 | up   |
| Fam149b       | 8.26E-05    | 3.188904762 | down |
| LOC630401     | 8.30E-05    | 1.91366148  | up   |
| Metap1        | 8.30E-05    | 2.135079384 | up   |
| LOC100048622  | 8.35E-05    | 2.975434542 | down |
| C1qtnf3       | 8.35E-05    | 7.059156895 | down |
| Fzd9          | 8.35E-05    | 1.93507576  | down |
| Pmpcb         | 8.35E-05    | 1.697584868 | up   |
| Wbscr16       | 8.35E-05    | 1.689199805 | up   |
| Rp23-297j14.5 | 8.35E-05    | 2.089379311 | up   |
| Gramd3        | 8.37E-05    | 3.307068825 | down |
| Cdk2          | 8.44E-05    | 4.913955212 | down |
| Ddx39         | 8.44E-05    | 3.194382668 | up   |

|               |             |             |      |
|---------------|-------------|-------------|------|
| Eapp          | 8.44E-05    | 2.126230717 | up   |
| Scp2          | 8.51E-05    | 2.563202143 | down |
| Cnih          | 8.52E-05    | 5.531797886 | down |
| Pde7a         | 8.59E-05    | 4.084401608 | down |
| Eif3s8        | 8.68E-05    | 2.311022997 | up   |
| Erbp2ip       | 8.71E-05    | 2.336574078 | down |
| Adamts7       | 8.73E-05    | 2.246266842 | up   |
| 5730507N06Rik | 8.74E-05    | 1.706574917 | up   |
| Acaa2         | 8.75E-05    | 3.990022898 | down |
| E230029F23Rik | 8.75E-05    | 11.05878258 | up   |
| Kcnk1         | 8.77E-05    | 1.755455256 | down |
| Ing4          | 8.77E-05    | 1.853547335 | up   |
| Hmga1         | 8.79E-05    | 2.260566473 | up   |
| Snrpa         | 8.79E-05    | 8.390077591 | down |
| BC023835      | 8.81E-05    | 2.025957108 | down |
| Eya1          | 8.83E-05    | 3.289761305 | down |
| Ppig          | 8.84E-05    | 2.570088148 | down |
| Rrm2          | 8.86E-05    | 2.764849901 | down |
| E030003O11Rik | 8.87E-05    | 1.572151542 | up   |
| Mrc1          | 8.87E-05    | 9.513801575 | up   |
| Tuba3b        | 8.87E-05    | 1.886989355 | up   |
| D030044M21Rik | 0.00008907  | 1.873750329 | up   |
| Rfc5          | 8.92E-05    | 2.207399607 | down |
| Papd4         | 8.92E-05    | 5.102193356 | down |
| 4833442A19Rik | 8.99E-05    | 1.598705053 | up   |
| ldh3g         | 9.03E-05    | 3.431070328 | down |
| Muc1          | 9.03E-05    | 1.912362933 | up   |
| Pdzrn4        | 9.03E-05    | 1.600646615 | down |
| Zim1          | 9.03E-05    | 1.8288486   | down |
| LOC100044363  | 9.08E-05    | 3.248797894 | down |
| Rint1         | 9.13E-05    | 2.064455509 | down |
| LOC545332     | 9.15E-05    | 2.463353634 | down |
| A730050C11Rik | 9.16E-05    | 1.921604276 | down |
| LOC545369     | 9.16E-05    | 1.953592658 | up   |
| Vkorc1        | 9.17E-05    | 2.572053909 | down |
| Plekha1       | 9.24E-05    | 1.997643352 | down |
| AI413582      | 9.25E-05    | 1.682733178 | up   |
| Ppox          | 9.26E-05    | 2.119540691 | down |
| 1700052O22Rik | 9.27E-05    | 1.758883834 | up   |
| Kat2a         | 9.27E-05    | 2.078574419 | up   |
| Mgea5         | 9.27E-05    | 2.379073143 | up   |
| Wdr45l        | 9.27E-05    | 2.206906557 | down |
| Ccdc80        | 9.28E-05    | 5.633236885 | down |
| Stx18         | 9.28E-05    | 2.186121464 | down |
| Eif2ak1       | 9.30E-05    | 1.69184041  | up   |
| Gm166         | 9.30E-05    | 2.082437515 | up   |
| EG432681      | 9.32E-05    | 1.565901279 | down |
| EG628040      | 9.32E-05    | 2.528613329 | down |
| Gsk3b         | 9.32E-05    | 2.113789797 | up   |
| LOC382058     | 9.32E-05    | 1.553151608 | down |
| LOC100044190  | 0.000093329 | 2.144710779 | up   |
| Polr2a        | 0.000093329 | 2.61126256  | up   |

|               |             |             |      |
|---------------|-------------|-------------|------|
| Ofd1          | 9.42E-05    | 2.403941393 | up   |
| Tmed3         | 9.46E-05    | 2.500232935 | down |
| Il17d         | 9.48E-05    | 1.621251226 | down |
| Zfp248        | 9.48E-05    | 1.807385087 | down |
| 4933429E06Rik | 9.50E-05    | 1.78855896  | down |
| Hoxd13        | 9.53E-05    | 4.240774155 | down |
| Mdm1          | 9.53E-05    | 2.247829199 | down |
| Rsrc1         | 9.53E-05    | 1.90875876  | up   |
| A230106M20Rik | 9.54E-05    | 1.976191759 | up   |
| Igsf10        | 9.54E-05    | 1.765522003 | up   |
| Trspap1       | 9.54E-05    | 2.104293346 | up   |
| Fbxl18        | 0.000095595 | 1.78158164  | up   |
| Lbp           | 9.61E-05    | 1.747176886 | up   |
| Sphk1         | 9.66E-05    | 2.671342373 | down |
| 6720467C03Rik | 9.69E-05    | 3.01122117  | down |
| Il6st         | 9.69E-05    | 2.309660196 | up   |
| Map4k4        | 9.71E-05    | 1.717309713 | up   |
| Nfatc4        | 0.000097194 | 1.957414746 | up   |
| D730006F06Rik | 9.73E-05    | 1.686440945 | up   |
| 2310021P13Rik | 9.75E-05    | 5.131253719 | up   |
| Gpn1          | 0.000097552 | 1.874037266 | down |
| 2900073C17Rik | 9.76E-05    | 3.825241804 | up   |
| Dpp6          | 9.77E-05    | 2.66005373  | up   |
| Znhit6        | 9.77E-05    | 1.624250531 | down |
| Samd1         | 9.78E-05    | 2.003146172 | up   |
| D2Ertd173e    | 9.79E-05    | 2.240970135 | up   |
| 9130404D08Rik | 0.000098168 | 1.99350214  | up   |
| LOC100046080  | 0.000098168 | 2.327822924 | down |
| Vasp          | 9.84E-05    | 1.56875813  | up   |
| Wdr75         | 9.85E-05    | 1.607116222 | up   |
| Gstk1         | 9.85E-05    | 1.722786427 | up   |
| 8430426H19Rik | 9.88E-05    | 1.800400019 | down |
| Uncx          | 0.000099051 | 1.693639398 | up   |
| Zfp180        | 9.92E-05    | 1.61986649  | down |
| Rasa3         | 9.94E-05    | 1.797145128 | up   |
| Utrn          | 9.95E-05    | 3.522297144 | down |
| Elk3          | 9.97E-05    | 2.433782816 | down |
| Gulp1         | 9.98E-05    | 5.826993942 | down |
| LOC100043919  | 1.00E-04    | 1.813572764 | up   |
| Pvrl1         | 0.000100283 | 1.91716814  | up   |
| Tceal3        | 0.000100434 | 2.379035711 | down |
| 5730557L09Rik | 0.000100557 | 1.955601096 | up   |
| Nqo1          | 0.000100883 | 2.024753332 | down |
| Dyrk1a        | 0.000101054 | 1.69041121  | up   |
| 4833416I09Rik | 0.000101672 | 2.399401903 | down |
| Crebzf        | 0.000101672 | 1.833200216 | down |
| Cdc20         | 0.000101716 | 7.528128624 | down |
| Igtp          | 0.000101716 | 1.856918097 | up   |
| Saps3         | 0.000101716 | 1.866085053 | up   |
| Rcl1          | 0.000102074 | 3.034357309 | down |
| Ing4          | 0.000102202 | 2.246471405 | up   |
| Hspb8         | 0.000102357 | 1.629815936 | up   |

|                 |             |             |      |
|-----------------|-------------|-------------|------|
| Spnb1           | 0.000102357 | 2.270959854 | up   |
| Plac8           | 0.000102556 | 1.642151475 | up   |
| scl0002720.1_68 | 0.000102643 | 1.88692534  | down |
| Csf1r           | 0.000102652 | 10.13853359 | up   |
| Gusb            | 0.000102689 | 2.571530342 | down |
| Tmem129         | 0.000102839 | 2.046130419 | down |
| LOC100047868    | 0.000103024 | 1.61555779  | up   |
| Pcdhb22         | 0.000103211 | 1.942202568 | up   |
| Fzd8            | 0.000103266 | 1.892960548 | down |
| LOC631204       | 0.000103266 | 6.606936932 | down |
| Znrf1           | 0.000103266 | 2.471314669 | up   |
| 4930431J19Rik   | 0.00010399  | 2.594918966 | down |
| Mdm1            | 0.000104214 | 2.260356188 | down |
| Bach1           | 0.000104515 | 2.485815525 | up   |
| B930096F20Rik   | 0.000104582 | 2.659277678 | up   |
| Cd93            | 0.000104582 | 4.224112511 | up   |
| D130063H01Rik   | 0.000104582 | 2.494008064 | up   |
| E330024J20Rik   | 0.000104582 | 2.55798316  | up   |
| Edem2           | 0.000104582 | 3.526446343 | down |
| Igf2bp3         | 0.000104629 | 1.510372758 | up   |
| Idh1            | 0.000105065 | 4.234066963 | down |
| Prdx6           | 0.000105065 | 1.883167625 | up   |
| Isyna1          | 0.000105451 | 1.97421813  | up   |
| Lig1            | 0.000105451 | 2.572464228 | down |
| Nab1            | 0.00010555  | 2.304262161 | down |
| LOC100042952    | 0.000105608 | 2.865468979 | down |
| Zfp212          | 0.000105608 | 1.513079166 | down |
| Tnfrsf21        | 0.000105662 | 1.828891873 | down |
| Slc6a15         | 0.00010601  | 3.621177435 | down |
| Fut10           | 0.000106063 | 1.557229281 | up   |
| Rbm4            | 0.000106063 | 4.00559473  | down |
| D030041G16Rik   | 0.000106813 | 2.153964996 | down |
| Huwe1           | 0.000106906 | 2.23468709  | up   |
| Baz1a           | 0.000106921 | 2.711282492 | down |
| Ndufs2          | 0.000107273 | 2.680295229 | down |
| Chka            | 0.000107911 | 1.773676992 | up   |
| Mthfd1          | 0.000108067 | 2.853935003 | down |
| Pycr1           | 0.000108067 | 2.10672164  | down |
| Rps10           | 0.000108067 | 1.536292553 | down |
| Tubb5           | 0.000108141 | 9.476763725 | down |
| Nudt18          | 0.000108753 | 1.646762729 | up   |
| Mpdz            | 0.000108887 | 2.104254484 | down |
| Pcgef6          | 0.000109145 | 2.215099096 | down |
| Spc25           | 0.000109145 | 2.462505341 | down |
| Ccdc47          | 0.000109372 | 1.841088176 | down |
| Gemin4          | 0.000109372 | 2.239537478 | down |
| Zfp334          | 0.000109372 | 1.533767939 | up   |
| Tmem159         | 0.000110355 | 2.281646967 | down |
| scl0004175.1_57 | 0.000110532 | 3.330337286 | down |
| LOC333765       | 0.000111028 | 2.09265995  | up   |
| Rhod            | 0.000111028 | 2.27553916  | down |
| Srpk2           | 0.000111028 | 2.011079073 | down |

|                  |             |             |      |
|------------------|-------------|-------------|------|
| Zmynd11          | 0.000111028 | 1.851743341 | down |
| 5730437N04Rik    | 0.000111271 | 2.95377183  | down |
| Actn4            | 0.000111584 | 7.594707966 | down |
| Taf9b            | 0.000111718 | 2.151478767 | down |
| 9530039I19Rik    | 0.000111951 | 1.780998826 | up   |
| Atp5e            | 0.000111951 | 2.15704608  | up   |
| Cacna2d3         | 0.000111989 | 2.231243849 | up   |
| LOC100039623     | 0.000112217 | 1.747301102 | up   |
| LOC630936        | 0.000112217 | 5.00859642  | down |
| Rnf167           | 0.000112217 | 2.502700806 | down |
| Uchl5ip          | 0.00011241  | 2.136801243 | up   |
| Pxdn             | 0.000113226 | 3.044472218 | down |
| Atp2a1           | 0.000113394 | 1.950869799 | up   |
| Slc29a1          | 0.000113689 | 1.97650373  | down |
| Acp2             | 0.000113727 | 1.811573982 | up   |
| Spnb2            | 0.000113727 | 2.274885654 | down |
| Arl6ip5          | 0.000114638 | 5.241146088 | down |
| Gpr27            | 0.000114638 | 1.85830164  | down |
| Cdca8            | 0.000114789 | 3.678204536 | down |
| Asns             | 0.000114934 | 3.113725662 | down |
| Ireb2            | 0.000115267 | 2.222700357 | down |
| Pwp2             | 0.000115381 | 1.874183059 | down |
| Gcnt1            | 0.000115537 | 2.185174465 | down |
| Prpf3            | 0.000115537 | 2.416350603 | down |
| Scnm1            | 0.000115652 | 2.153906584 | up   |
| 2610319H10Rik    | 0.00011573  | 2.622207642 | up   |
| Ttyh2            | 0.000115826 | 2.502031326 | up   |
| Sfrs5            | 0.000115965 | 8.224294663 | down |
| Agfg1            | 0.000116049 | 4.517463207 | down |
| Chst5            | 0.000116142 | 1.624899149 | down |
| LOC194642        | 0.000116142 | 1.706556439 | down |
| Tmod3            | 0.000116142 | 1.510240793 | up   |
| LOC100039001     | 0.000116467 | 2.209457159 | up   |
| Aof1             | 0.000116602 | 1.677131534 | down |
| Stau2            | 0.000116672 | 3.744575501 | down |
| Hba-x            | 0.000116725 | 12.84805584 | up   |
| LOC330553        | 0.000116815 | 1.928778887 | up   |
| 2310003C23Rik    | 0.000117151 | 3.682601929 | down |
| Jmjd1b           | 0.000117151 | 2.84370327  | up   |
| Ppm2c            | 0.000117151 | 2.620201826 | down |
| Ubtf             | 0.000117151 | 3.054538012 | up   |
| Pnkd             | 0.000117877 | 1.650520682 | down |
| scl0002624.1_576 | 0.000117877 | 1.930971861 | down |
| Top3b            | 0.000117877 | 1.889467001 | up   |
| D130054E02Rik    | 0.000117917 | 2.106685638 | up   |
| Pitpnm1          | 0.000118036 | 2.619600058 | up   |
| Bdh2             | 0.000118334 | 1.987216711 | up   |
| Dus3l            | 0.000118334 | 1.818896174 | down |
| Leprel1          | 0.000118398 | 2.813713551 | down |
| Foxj3            | 0.000118839 | 1.898161292 | down |
| Sox11            | 0.000118951 | 3.148519754 | up   |
| Fgfr2            | 0.000120034 | 4.836047649 | down |

|                |             |             |      |
|----------------|-------------|-------------|------|
| Lcp2           | 0.000120034 | 3.685230255 | up   |
| Tbx15          | 0.000120034 | 2.563603878 | down |
| Mrpl3          | 0.000120142 | 4.859736443 | down |
| Larp7          | 0.000120165 | 1.845251441 | up   |
| Tmem158        | 0.000120514 | 1.71411705  | down |
| LOC100041504   | 0.000120518 | 2.635768414 | up   |
| scl000723.1_11 | 0.000120648 | 1.805446386 | down |
| C1qc           | 0.000120748 | 9.142455101 | up   |
| Rgs9           | 0.00012087  | 2.232816219 | up   |
| Ppp1r3b        | 0.000121018 | 2.058467388 | down |
| Serpinb6b      | 0.000121018 | 1.588743329 | up   |
| Kank1          | 0.000121201 | 5.633127213 | down |
| Ube2g1         | 0.000121229 | 9.651836395 | down |
| Pard3          | 0.000121242 | 1.597406507 | up   |
| Cxxc5          | 0.000121477 | 2.226545811 | down |
| Mcm4           | 0.000121712 | 4.931772709 | down |
| Eid2           | 0.000122241 | 3.099127054 | down |
| Ptprk          | 0.000122264 | 2.001463413 | down |
| Atp2b1         | 0.000122544 | 1.961512804 | down |
| Bcl2a1b        | 0.000122883 | 3.496189833 | up   |
| Pmaip1         | 0.000122983 | 1.64503336  | down |
| Gabbr1         | 0.00012307  | 2.014508009 | up   |
| Ap2b1          | 0.00012328  | 1.770541906 | down |
| B230317C12Rik  | 0.000125099 | 1.888229489 | down |
| B130020M22Rik  | 0.00012518  | 4.930659771 | up   |
| Ash2l          | 0.000125609 | 2.318566799 | up   |
| Arhgap28       | 0.000125647 | 2.059422255 | down |
| 4933401B06Rik  | 0.000125964 | 1.870440364 | down |
| Rnf122         | 0.000125964 | 2.002115727 | up   |
| LOC234081      | 0.000125983 | 2.682436228 | down |
| Sec14l1        | 0.000126182 | 1.908110738 | up   |
| Adfp           | 0.000126225 | 1.538419843 | down |
| Asph           | 0.000126393 | 3.164973259 | down |
| Snhg11         | 0.000126484 | 2.531388998 | up   |
| Ccbl2          | 0.00012685  | 2.05053997  | down |
| Sipa1l2        | 0.000126959 | 2.191265822 | up   |
| Nsl1           | 0.000127036 | 2.034730196 | down |
| Rpain          | 0.00012767  | 2.099730015 | up   |
| Zfp322a        | 0.00012767  | 1.960974693 | up   |
| Acad9          | 0.000127842 | 2.273583412 | down |
| Zcchc3         | 0.000127945 | 3.07166028  | down |
| Dcn            | 0.000128409 | 2.875388622 | down |
| Ubxn2b         | 0.000128829 | 1.952109337 | up   |
| 3110018C07Rik  | 0.00012913  | 2.153468847 | up   |
| Rps20          | 0.000129135 | 1.961827636 | up   |
| 2310007H09Rik  | 0.000129417 | 1.623962998 | down |
| Comt           | 0.000129417 | 1.879665375 | down |
| Gtf2h1         | 0.000129417 | 2.01801014  | down |
| Mrps18b        | 0.000129778 | 2.462709427 | down |
| Atp8b2         | 0.000129782 | 1.712896466 | down |
| Igfbp2         | 0.000129808 | 3.676183224 | down |
| LOC545339      | 0.000129833 | 1.719917774 | up   |



|                 |             |             |      |
|-----------------|-------------|-------------|------|
| MGC60742        | 0.000129833 | 3.174955845 | down |
| Sgk             | 0.000130024 | 5.802307606 | down |
| Ctdp1           | 0.000130309 | 1.903949857 | down |
| Mycbpap         | 0.000130832 | 2.147407293 | up   |
| LOC100048622    | 0.000131475 | 2.674855232 | down |
| Prpf3           | 0.000131475 | 2.690169573 | down |
| Fign            | 0.000131762 | 2.133958101 | down |
| Xpo5            | 0.000131762 | 1.980903268 | up   |
| 5730601F06Rik   | 0.000132154 | 1.877603173 | down |
| Gbl             | 0.000132154 | 1.988775134 | down |
| Dnase2a         | 0.000132285 | 1.547486782 | up   |
| A830080D01Rik   | 0.000132311 | 1.836452127 | down |
| Pitx2           | 0.000132311 | 2.135507107 | down |
| Tle1            | 0.000132311 | 1.573440909 | down |
| Vamp3           | 0.000132311 | 2.437590838 | down |
| Zfp462          | 0.000132311 | 3.295689821 | up   |
| Spsb4           | 0.000132742 | 1.836065888 | down |
| Ccdc115         | 0.000133376 | 3.600524664 | down |
| Sdccag3         | 0.000133376 | 3.617164373 | down |
| LOC215086       | 0.000133431 | 2.081698656 | up   |
| Ints10          | 0.000134131 | 1.54038012  | up   |
| Trim25          | 0.00013425  | 3.550846815 | up   |
| Bcl7c           | 0.000134265 | 1.579469085 | up   |
| Abhd13          | 0.000134479 | 2.573749781 | up   |
| Ptpn12          | 0.000134998 | 2.747475624 | down |
| 2810026P18Rik   | 0.000135788 | 3.114598513 | down |
| Tbc1d12         | 0.000135793 | 1.953297377 | down |
| C1qb            | 0.000136514 | 9.200699806 | up   |
| Ethe1           | 0.000137062 | 1.57309711  | up   |
| Atic            | 0.000137241 | 3.777183056 | down |
| Chd4            | 0.000137241 | 3.153283358 | down |
| Gyg             | 0.000137241 | 2.511395454 | down |
| Atp6v0b         | 0.000137245 | 1.995602369 | up   |
| LOC100046483    | 0.000137245 | 1.714792252 | up   |
| scl0002368.1_75 | 0.000137245 | 3.614784956 | down |
| 6030441I21Rik   | 0.000137664 | 2.237386704 | up   |
| Gdf10           | 0.000137664 | 2.198053122 | down |
| 2010209O12Rik   | 0.000137699 | 1.510862589 | down |
| Fbxw11          | 0.0001377   | 2.155486345 | up   |
| Haghl           | 0.00013786  | 1.854074359 | up   |
| 1190002H23Rik   | 0.000137999 | 2.61289382  | down |
| Mgp             | 0.000137999 | 1.884006143 | down |
| Tubgcp4         | 0.000137999 | 1.804013491 | down |
| eGFP            | 0.000138096 | 2.251048327 | down |
| LOC100039786    | 0.000138096 | 3.559148073 | down |
| Casp1           | 0.000138109 | 3.609135389 | up   |
| LOC384017       | 0.000138109 | 1.737968445 | up   |
| Nsun5           | 0.000138109 | 2.054802179 | down |
| Rwdd1           | 0.000138109 | 2.392724514 | down |
| Ubac1           | 0.000138109 | 1.838465571 | up   |
| Bmf             | 0.000138166 | 2.116255999 | up   |
| Ctnnd1          | 0.000138565 | 1.712701678 | up   |

|               |             |             |      |
|---------------|-------------|-------------|------|
| Cdc42ep3      | 0.000139151 | 2.477018833 | down |
| Gmcl1         | 0.000139791 | 2.46929431  | down |
| B230327D02Rik | 0.00013985  | 2.446418285 | up   |
| Bcas2         | 0.000140269 | 1.929402709 | up   |
| LOC100041500  | 0.0001403   | 1.77828598  | down |
| 5830408B19Rik | 0.000140538 | 2.067686796 | up   |
| Mrpl9         | 0.000140538 | 2.022320986 | down |
| Ppt1          | 0.000140538 | 2.951411963 | down |
| Tsr2          | 0.000140538 | 2.192851782 | down |
| Rer1          | 0.000140932 | 3.518359423 | down |
| A930001K02Rik | 0.00014106  | 1.60479939  | up   |
| Slc11a2       | 0.00014106  | 1.905745029 | up   |
| Amigo2        | 0.000141061 | 1.647422075 | up   |
| LOC386534     | 0.00014129  | 1.779201269 | down |
| Cacna1g       | 0.000141463 | 1.854526758 | up   |
| Tssc1         | 0.000141487 | 2.46271801  | down |
| LOC675228     | 0.000141645 | 1.539102912 | up   |
| Rasgef1b      | 0.000141645 | 1.734761953 | down |
| Rock1         | 0.000141645 | 3.036412716 | down |
| 4930579G24Rik | 0.000141816 | 2.567597628 | down |
| LOC224914     | 0.000142599 | 3.398641348 | down |
| Mib1          | 0.000142599 | 1.643849969 | down |
| Mkl1          | 0.000142599 | 3.165697575 | up   |
| Dtx3l         | 0.00014272  | 1.838681459 | up   |
| Rassf1        | 0.0001428   | 3.162237644 | down |
| Col2a1        | 0.00014311  | 4.782061577 | down |
| Galnt1        | 0.000143429 | 2.995471954 | down |
| Grrp1         | 0.000143429 | 1.624820709 | up   |
| Ssh1          | 0.000143528 | 1.837801218 | up   |
| Krr1          | 0.000143639 | 3.11702013  | down |
| 9830001H06Rik | 0.000143649 | 2.590276957 | up   |
| Nscn1         | 0.000144019 | 1.940010428 | up   |
| Pde1a         | 0.000144025 | 1.505442143 | up   |
| B230215E14Rik | 0.000144219 | 1.732112527 | down |
| Jarid1b       | 0.000144414 | 1.920661807 | up   |
| Tyrobp        | 0.000144967 | 8.94783783  | up   |
| Uros          | 0.000145046 | 3.017705441 | down |
| Ibtk          | 0.000145204 | 1.854676843 | down |
| Jund1         | 0.000145623 | 1.611979365 | up   |
| LOC382145     | 0.000145623 | 1.808943629 | up   |
| 1110019O10Rik | 0.000145743 | 2.559967995 | up   |
| D12Ert551e    | 0.000146949 | 1.897744536 | down |
| Gnai2         | 0.000146988 | 1.68414557  | up   |
| LOC100044363  | 0.000147572 | 2.188920975 | down |
| Mbtd1         | 0.000147572 | 2.307616949 | up   |
| Surf2         | 0.000147572 | 1.810287476 | down |
| Rbm8a         | 0.000147651 | 1.960102916 | up   |
| Lrrc59        | 0.000147744 | 2.17415309  | up   |
| 2610036L11Rik | 0.000148486 | 1.846237898 | down |
| Csnk1d        | 0.000149287 | 7.794163704 | down |
| Prmt5         | 0.000149678 | 4.670490742 | down |
| Clk2          | 0.000149894 | 2.464841843 | down |

|                  |             |             |      |
|------------------|-------------|-------------|------|
| CltA             | 0.000149894 | 2.785630941 | up   |
| Matn1            | 0.000149894 | 21.81431389 | down |
| Pik3c2a          | 0.000149894 | 2.614270687 | down |
| Rad23a           | 0.000149894 | 2.005789518 | up   |
| Ddah1            | 0.000150202 | 2.672152281 | down |
| Top2b            | 0.000150433 | 2.274976969 | up   |
| 2310061C15Rik    | 0.000150549 | 1.859614253 | up   |
| 6330548G22Rik    | 0.000150549 | 2.512672901 | down |
| D930017K21Rik    | 0.000150549 | 2.548394442 | down |
| Fam125a          | 0.000150549 | 1.557834983 | up   |
| Entpd6           | 0.000150742 | 1.803019047 | down |
| H2-Ke6           | 0.000150919 | 1.691312194 | up   |
| Nup54            | 0.000151071 | 2.283360004 | down |
| Mrrf             | 0.000151654 | 3.472204208 | down |
| LOC386537        | 0.000152253 | 2.130187035 | down |
| Tmco3            | 0.000152503 | 2.340826511 | down |
| Grin2a           | 0.000152565 | 1.686123848 | up   |
| Lptm5            | 0.000152566 | 14.41507435 | up   |
| Fbxo8            | 0.000153197 | 2.77720499  | down |
| Adrm1            | 0.000153259 | 1.780843496 | down |
| Gpx8             | 0.000153259 | 2.936581612 | down |
| Pelp1            | 0.000153259 | 1.933809876 | up   |
| Slc30a5          | 0.000153381 | 2.769304037 | down |
| H2-T23           | 0.000153863 | 1.792632103 | up   |
| Pwwp2b           | 0.00015419  | 1.613749385 | up   |
| Rbbp9            | 0.000154216 | 2.113550901 | down |
| Snurf            | 0.000154585 | 5.384869576 | down |
| C030015D21Rik    | 0.000154974 | 2.022259474 | up   |
| Gde1             | 0.00015503  | 2.987529039 | down |
| Prkg2            | 0.000155469 | 2.403168201 | down |
| 2810442O16Rik    | 0.000155825 | 2.647425175 | up   |
| Robo4            | 0.000155974 | 3.936722517 | up   |
| C530040B18Rik    | 0.00015612  | 2.233397722 | up   |
| Ddx10            | 0.000156189 | 3.112540722 | down |
| Kpna4            | 0.000156189 | 1.685567498 | up   |
| Ergic2           | 0.000156554 | 2.529469729 | down |
| scl0002443.1_418 | 0.000157052 | 1.671161413 | down |
| Tubg1            | 0.000157104 | 2.520186901 | up   |
| A930025D01Rik    | 0.000157548 | 1.654757142 | up   |
| Nup50            | 0.000157548 | 2.112403631 | down |
| AW120700         | 0.000157574 | 1.721542716 | up   |
| Cdca4            | 0.000157574 | 3.118937254 | down |
| Mib2             | 0.000157574 | 1.802290916 | up   |
| Nckap1l          | 0.000157574 | 6.819299221 | up   |
| Pcolce2          | 0.000157574 | 3.70184803  | down |
| Ptprs            | 0.000157574 | 1.818262696 | up   |
| Rpain            | 0.000157574 | 1.658653379 | up   |
| Sash3            | 0.000157574 | 5.23313427  | up   |
| Strn3            | 0.000157574 | 2.576465607 | up   |
| Plvap            | 0.000157636 | 2.057566881 | up   |
| LOC380706        | 0.000158041 | 1.573249698 | up   |
| 2810407C02Rik    | 0.000159031 | 2.07134819  | down |

|                  |             |             |      |
|------------------|-------------|-------------|------|
| Srpx             | 0.000159031 | 2.234292746 | down |
| Cox4nb           | 0.000159147 | 1.87360847  | up   |
| Ppp4r4           | 0.000159147 | 1.729207873 | down |
| 2410015M20Rik    | 0.000159297 | 1.890218139 | up   |
| Exod1            | 0.000159297 | 3.380065441 | down |
| Snhg11           | 0.000159297 | 2.141139031 | up   |
| Ilf3             | 0.000159389 | 1.76270628  | down |
| 6330575B07Rik    | 0.000159506 | 2.070081949 | up   |
| Aqp1             | 0.000159506 | 1.709627271 | down |
| scl0002791.1_134 | 0.000159506 | 4.224085331 | down |
| Nfya             | 0.000159534 | 2.474164963 | down |
| Nte              | 0.000159715 | 2.236660004 | up   |
| C920016K16Rik    | 0.000159936 | 1.780875325 | up   |
| LOC213480        | 0.000159936 | 6.108706951 | up   |
| Ikbkb            | 0.000160557 | 2.112020493 | up   |
| Hnrpm            | 0.000160579 | 3.236380577 | down |
| 9930105H17Rik    | 0.000160743 | 2.209055662 | up   |
| Fpgs             | 0.000160783 | 2.574602366 | down |
| Chad             | 0.000160975 | 3.34805131  | down |
| C130067A03Rik    | 0.000161369 | 1.89114964  | up   |
| Pomt1            | 0.000161649 | 2.218795538 | down |
| Crls1            | 0.000161767 | 1.603158593 | down |
| Alg14            | 0.000161813 | 1.762085676 | down |
| Cd320            | 0.000161848 | 1.627228022 | up   |
| Csda             | 0.000161948 | 2.968462229 | down |
| 5730526G10Rik    | 0.000162241 | 2.624038935 | up   |
| Actr10           | 0.000162241 | 3.908699751 | down |
| Stxbp2           | 0.000162241 | 2.303475142 | up   |
| Bcl2a1b          | 0.000162888 | 3.849477053 | up   |
| Sfxn2            | 0.000162888 | 1.936788321 | down |
| Ccl4             | 0.000163236 | 5.268384934 | up   |
| 2310014D11Rik    | 0.000163965 | 1.908103347 | up   |
| Ift20            | 0.000163965 | 2.595682383 | down |
| EG668831         | 0.000164093 | 2.309412956 | down |
| Phldb2           | 0.000164297 | 2.147843361 | up   |
| Smarcd2          | 0.000164297 | 2.058829784 | up   |
| Mcm6             | 0.000164502 | 2.807902575 | down |
| Mll1             | 0.000166815 | 2.228741407 | up   |
| Slc25a11         | 0.000166815 | 1.81892693  | down |
| Prpf4            | 0.000166852 | 1.911750555 | down |
| 4732418C07Rik    | 0.000167002 | 1.560702086 | down |
| Cdk6             | 0.000167002 | 1.7740798   | down |
| 4930418I18Rik    | 0.000167869 | 1.956115007 | up   |
| Adora2b          | 0.000167869 | 1.651929617 | down |
| Spred1           | 0.000167979 | 2.010764599 | down |
| Ak2              | 0.000168415 | 2.802975655 | down |
| LOC100040919     | 0.000168566 | 1.761731863 | down |
| LOC100044159     | 0.000168566 | 1.764511824 | up   |
| Osbpl11          | 0.00016901  | 1.661468267 | up   |
| 2610207I05Rik    | 0.000169109 | 1.543571949 | up   |
| Ect2             | 0.000169814 | 2.233487606 | down |
| EG237361         | 0.000169839 | 1.583426714 | down |

|                         |             |             |      |
|-------------------------|-------------|-------------|------|
| Acbd5                   | 0.000169853 | 1.699282169 | down |
| Zfp687                  | 0.000169853 | 2.247606039 | up   |
| Lamp2                   | 0.000170013 | 2.00801754  | down |
| Vars2l                  | 0.000170013 | 1.995289683 | up   |
| Csnk2a1-rs4             | 0.000170201 | 2.534597397 | up   |
| Aktip                   | 0.000170243 | 1.671546698 | up   |
| Nup85                   | 0.000170363 | 1.640829682 | up   |
| Entpd6                  | 0.000170728 | 1.828014612 | down |
| 4833439L19Rik           | 0.000171146 | 2.512944937 | down |
| LOC384593               | 0.000171146 | 2.057909966 | up   |
| 5830467E07Rik           | 0.000171257 | 1.807436705 | up   |
| scl0003237.1_21         | 0.000171297 | 1.786426902 | down |
| 7420700D11Rik           | 0.000171324 | 2.728879929 | down |
| Ccdc97                  | 0.000171358 | 1.901199222 | up   |
| Ube4b                   | 0.000171358 | 1.58241725  | up   |
| Creb3l4                 | 0.000172455 | 1.835996747 | up   |
| Pdzd8                   | 0.000173315 | 2.089199781 | down |
| mt-Nd6                  | 0.000173548 | 3.425084829 | up   |
| scl000034.1_162_REVCOMP | 0.000173548 | 1.862678766 | up   |
| Tubb2b                  | 0.000173548 | 9.238461494 | down |
| Dph3                    | 0.000173756 | 1.626571298 | down |
| Nfatc1                  | 0.000173756 | 3.104269505 | down |
| Slc35e3                 | 0.000173756 | 2.735560656 | down |
| Cyp4v3                  | 0.00017573  | 1.880655766 | up   |
| Ppil3                   | 0.00017573  | 3.462114334 | down |
| LOC225924               | 0.000176484 | 1.94114542  | down |
| Zhx1                    | 0.000176596 | 1.641436458 | down |
| C130078D09Rik           | 0.000176664 | 1.997104049 | up   |
| Plxnb2                  | 0.000176791 | 2.296969891 | up   |
| Nme7                    | 0.000176904 | 4.145028114 | down |
| Hoxb4                   | 0.000177079 | 3.129840374 | up   |
| 1700071K01Rik           | 0.000177333 | 1.771579504 | up   |
| Ctnn                    | 0.000177333 | 2.442151308 | down |
| Imp4                    | 0.000177333 | 2.244060278 | down |
| 2510042H12Rik           | 0.000177455 | 5.464388847 | up   |
| Rbms1                   | 0.000177455 | 1.956834078 | down |
| A430107O13Rik           | 0.000177985 | 1.644015312 | down |
| Esam                    | 0.000178354 | 3.492754221 | up   |
| Mak16                   | 0.000178354 | 2.69032526  | down |
| LOC381132               | 0.000178773 | 1.781636596 | up   |
| Setd1a                  | 0.000178989 | 2.38780117  | up   |
| Lyplal1                 | 0.000179372 | 2.084866047 | down |
| Swap70                  | 0.000179372 | 1.938699961 | down |
| Snx7                    | 0.00018032  | 2.196594715 | down |
| LOC100046918            | 0.000180627 | 6.357720852 | down |
| Minpp1                  | 0.000180671 | 2.846674681 | down |
| 2810449M09Rik           | 0.000180728 | 2.424717188 | up   |
| Snrpd3                  | 0.000180799 | 2.356797218 | down |
| Spryd4                  | 0.000180799 | 2.254445076 | down |
| Hel308                  | 0.00018097  | 1.657880664 | down |
| LOC669660               | 0.000181279 | 2.312144995 | down |
| Gm1673                  | 0.000181618 | 1.606569052 | up   |

|                  |             |             |      |
|------------------|-------------|-------------|------|
| Pcca             | 0.000181618 | 2.243657351 | down |
| Lmcd1            | 0.000181909 | 2.61991334  | down |
| Txndc11          | 0.000182272 | 1.925432921 | down |
| Mrpl18           | 0.000182329 | 2.529149294 | down |
| Pmp22            | 0.000182338 | 2.244052887 | down |
| 4933421O10Rik    | 0.000182614 | 1.599602699 | down |
| A630053N20Rik    | 0.000182614 | 1.542620421 | down |
| Actn4            | 0.000182614 | 1.867175221 | down |
| Ece1             | 0.000182614 | 2.585051537 | up   |
| Sgsh             | 0.000182614 | 2.196357012 | up   |
| Tor1aip1         | 0.000182614 | 2.358776569 | down |
| Uhrf2            | 0.000182614 | 3.120145798 | down |
| Ebag9            | 0.000182954 | 1.851425886 | down |
| Pde7a            | 0.000183294 | 2.622594118 | down |
| Slc39a1          | 0.000183908 | 1.91736424  | up   |
| LOC100044324     | 0.00018419  | 1.998746514 | down |
| LOC676974        | 0.000184285 | 4.909405708 | down |
| 2610208M17Rik    | 0.000184606 | 1.524551868 | down |
| 2610305D13Rik    | 0.000184869 | 2.489267111 | up   |
| Tulp3            | 0.000185298 | 1.678471685 | up   |
| B230209J16Rik    | 0.000185385 | 2.346597672 | down |
| Bms1             | 0.000185385 | 2.213126659 | up   |
| D430029G22Rik    | 0.000185385 | 1.726414561 | up   |
| Lrpprc           | 0.000185385 | 2.193031788 | down |
| Pawr             | 0.000185385 | 1.703588367 | down |
| Tbc1d25          | 0.000185385 | 1.577071071 | down |
| Col9a1           | 0.000185424 | 4.804460526 | down |
| Ebf3             | 0.000185925 | 2.323424101 | down |
| C730029F17Rik    | 0.000186285 | 1.750896812 | down |
| Angptl6          | 0.000186962 | 1.557759881 | up   |
| Cltc             | 0.000186962 | 3.606269836 | down |
| Shc1             | 0.000186962 | 2.020826817 | down |
| A630020I15Rik    | 0.000187293 | 1.850595832 | up   |
| Wdr82            | 0.000187929 | 2.318786383 | down |
| Anxa4            | 0.000188032 | 2.144967794 | up   |
| C630023I10Rik    | 0.000188347 | 1.626683354 | down |
| LOC625752        | 0.000188347 | 2.01060915  | up   |
| A430041B07Rik    | 0.000188614 | 1.926435471 | down |
| Kif15            | 0.000188614 | 2.141533852 | up   |
| LOC100048316     | 0.000188641 | 3.269137621 | down |
| 2810022L02Rik    | 0.000188716 | 1.928429723 | down |
| scl0001764.1_391 | 0.000189054 | 1.957418442 | up   |
| Creld1           | 0.000189229 | 1.6855793   | up   |
| Ndufs4           | 0.000189502 | 1.725573778 | down |
| Wif1             | 0.000189969 | 2.992610455 | down |
| Acsl3            | 0.000190071 | 1.660969496 | up   |
| LOC100043011     | 0.000190071 | 2.338733673 | down |
| Glis2            | 0.000190262 | 1.845925927 | down |
| Stra13           | 0.000190361 | 1.632276774 | down |
| St5              | 0.000190435 | 1.758947134 | up   |
| Pmm2             | 0.000190475 | 3.062105179 | down |
| LOC674214        | 0.000190546 | 1.774911046 | up   |

|                 |             |             |      |
|-----------------|-------------|-------------|------|
| Snx13           | 0.000190969 | 1.833219647 | down |
| A830081L15Rik   | 0.000191081 | 3.914179564 | up   |
| Rasl11b         | 0.000191642 | 4.432396889 | down |
| Bccip           | 0.000192184 | 2.060667515 | up   |
| 2610318N02Rik   | 0.000192478 | 2.004095316 | down |
| Coq6            | 0.000192779 | 2.683963537 | down |
| Ptgs1           | 0.000192952 | 2.401218891 | up   |
| Xist            | 0.000192952 | 2.453337431 | up   |
| 2010106G01Rik   | 0.000192957 | 2.00118947  | down |
| Txnrd1          | 0.000193271 | 2.221156359 | up   |
| 1700034H14Rik   | 0.00019368  | 5.542374134 | down |
| 5930404L04Rik   | 0.00019368  | 1.618393064 | up   |
| Papss1          | 0.00019368  | 2.286304712 | down |
| Pdzd11          | 0.00019368  | 2.356324673 | down |
| 4833426J09Rik   | 0.000194382 | 1.871853352 | up   |
| Elfn1           | 0.000194382 | 1.511797667 | up   |
| Fn1             | 0.000194382 | 4.103619576 | down |
| LOC100044774    | 0.000194382 | 1.791710377 | up   |
| LOC219145       | 0.000194382 | 5.261116028 | down |
| LOC385644       | 0.000194382 | 3.93204689  | down |
| Praf2           | 0.000194382 | 2.07302165  | down |
| Tgfbr2          | 0.000194418 | 2.211287975 | down |
| Kank4           | 0.000194497 | 3.309415579 | down |
| LOC621612       | 0.000195068 | 16.27458191 | down |
| D6Wsu163e       | 0.000195416 | 1.843824387 | down |
| 9030025P20Rik   | 0.000195492 | 1.611269712 | down |
| Gsn             | 0.000195492 | 3.569870949 | down |
| scl0002500.1_87 | 0.000195492 | 1.718197107 | down |
| Vamp8           | 0.000195685 | 1.792883992 | up   |
| Kifc2           | 0.000196762 | 2.367343187 | up   |
| E330018D03Rik   | 0.000197053 | 2.762667418 | up   |
| Fam120b         | 0.000197096 | 2.083258629 | down |
| 5730409K12Rik   | 0.000198304 | 1.716290116 | up   |
| Trim68          | 0.000198596 | 1.823496938 | up   |
| Nsdhl           | 0.000198772 | 3.438551664 | down |
| Bxdc1           | 0.000199054 | 1.746124148 | up   |
| D930028F11Rik   | 0.000199054 | 1.836795688 | down |
| LOC100043675    | 0.000199179 | 4.093404293 | down |
| Arid4a          | 0.000199289 | 2.117062807 | down |
| Twsg1           | 0.000199575 | 1.890249968 | down |
| Ttk             | 0.000200007 | 1.543180704 | down |
| Pcsk6           | 0.000200021 | 2.70586133  | down |
| Man1a           | 0.000200224 | 2.250897408 | down |
| Rfc2            | 0.000200268 | 3.2469244   | down |
| LOC635297       | 0.000200399 | 1.767178178 | down |
| Vkorc1          | 0.000200648 | 1.718533993 | down |
| Shox2           | 0.000200839 | 2.458697319 | up   |
| 2310066E14Rik   | 0.000201798 | 2.23844552  | up   |
| Wbscr27         | 0.000202149 | 1.81077075  | up   |
| Mccc1           | 0.000202952 | 1.944127798 | up   |
| zfp507          | 0.000203364 | 1.507071495 | up   |
| Cks1b           | 0.000203401 | 2.060446024 | up   |

|                |             |             |      |
|----------------|-------------|-------------|------|
| LOC385849      | 0.000203401 | 1.717190385 | up   |
| Rnf34          | 0.000203401 | 2.586604357 | down |
| Deb1           | 0.00020349  | 1.929145098 | down |
| Camk2a         | 0.000204044 | 1.617012858 | up   |
| Spg7           | 0.0002041   | 1.760671735 | up   |
| Ccdc109a       | 0.000204257 | 4.056745529 | down |
| Sema3e         | 0.000204257 | 1.784626603 | down |
| InsI3          | 0.000204376 | 2.253713846 | up   |
| Trrp2          | 0.000204376 | 1.530748129 | up   |
| Afg3l2         | 0.000204395 | 1.6511513   | down |
| Dhx16          | 0.000204395 | 1.649022222 | up   |
| Sav1           | 0.000204395 | 1.698193073 | down |
| BC057552       | 0.0002049   | 2.077195883 | up   |
| Eif2b1         | 0.0002049   | 2.284325838 | down |
| Rwdd3          | 0.000205164 | 1.748553515 | down |
| Lbr            | 0.000205577 | 3.998609781 | down |
| Klhl6          | 0.000205834 | 4.3796525   | up   |
| LOC100047260   | 0.000205935 | 2.021965265 | up   |
| LOC383860      | 0.000205935 | 2.06079936  | down |
| Stfa1          | 0.000205935 | 1.990672827 | up   |
| Hs3st6         | 0.000206971 | 1.50545454  | down |
| LOC630567      | 0.00020928  | 1.660908938 | up   |
| scl0002083.1_6 | 0.000209287 | 2.339989662 | down |
| BC031853       | 0.000209613 | 2.614721775 | up   |
| Nat12          | 0.000209928 | 2.433582544 | down |
| Tceal1         | 0.000210063 | 2.470224142 | down |
| Tmem201        | 0.000210115 | 1.929938436 | up   |
| LOC380771      | 0.000210973 | 1.569788575 | up   |
| Nit1           | 0.00021119  | 1.603829622 | up   |
| Mmrn2          | 0.000211225 | 2.364754677 | up   |
| Zfp512         | 0.000211225 | 1.506615281 | down |
| Vwf            | 0.000211269 | 3.012349367 | up   |
| Fbn1           | 0.000211383 | 1.988004923 | up   |
| Cx3cr1         | 0.000211409 | 9.247459412 | up   |
| BC017612       | 0.000211431 | 3.302004099 | down |
| LOC100044736   | 0.000212035 | 2.109254122 | up   |
| 1700123A16Rik  | 0.000212288 | 3.86538291  | down |
| Coq10a         | 0.000212379 | 1.652246952 | up   |
| Lyve1          | 0.000212481 | 5.489628315 | up   |
| Zc3h13         | 0.000212622 | 2.570641756 | down |
| Nt5c           | 0.000212699 | 2.678080082 | up   |
| Nkiras2        | 0.000212928 | 2.277071714 | up   |
| Rarb           | 0.000213139 | 2.624078751 | down |
| Tbp            | 0.000213929 | 2.356360912 | down |
| BC003993       | 0.000214197 | 2.68414855  | down |
| BC016423       | 0.000214197 | 3.991883993 | down |
| Nus1           | 0.000214197 | 3.011378527 | down |
| Il6st          | 0.000215054 | 1.585917234 | up   |
| Maob           | 0.000215054 | 2.211835861 | down |
| Elac2          | 0.000215058 | 1.903346419 | down |
| Sdccag8        | 0.000215058 | 1.983003497 | up   |
| Tbc1d2b        | 0.000215094 | 1.949914932 | up   |



|               |             |             |      |
|---------------|-------------|-------------|------|
| 5031439A09Rik | 0.00021512  | 1.599751711 | down |
| Fcgr3         | 0.00021512  | 9.903422356 | up   |
| Lrrc33        | 0.00021512  | 3.905851841 | up   |
| Pogk          | 0.00021512  | 1.748232365 | down |
| Saps1         | 0.00021512  | 2.94052577  | up   |
| Cxcl4         | 0.000215307 | 16.17577362 | up   |
| Ccdc111       | 0.000215316 | 1.945296645 | up   |
| Prdx3         | 0.000215316 | 2.87779212  | down |
| Hes6          | 0.00021544  | 3.088968277 | down |
| Anxa5         | 0.000216236 | 2.012839794 | down |
| Foxa3         | 0.000216565 | 2.651058435 | down |
| Plek          | 0.00021745  | 2.357760429 | up   |
| Fcna          | 0.000217756 | 4.94371748  | up   |
| LOC100045439  | 0.000217756 | 3.446047545 | down |
| Cirh1a        | 0.00021776  | 2.133444786 | up   |
| LOC626309     | 0.00021776  | 6.07749176  | down |
| Dlx6          | 0.000217916 | 2.094132662 | down |
| Freq          | 0.000217916 | 1.907877088 | up   |
| Glcci1        | 0.000217916 | 2.098738909 | down |
| Ngfrap1       | 0.000217916 | 1.671906591 | down |
| Nol5a         | 0.000217916 | 2.633870363 | down |
| Pcgf5         | 0.000217916 | 1.571983933 | down |
| 1500041N16Rik | 0.000218599 | 1.89926815  | up   |
| Ltbp3         | 0.000218781 | 2.40032959  | down |
| 1300013D05Rik | 0.00021886  | 1.626240134 | up   |
| Mthfd2l       | 0.00021886  | 1.65741992  | down |
| Endogl1       | 0.000219798 | 3.566064835 | down |
| EG268795      | 0.000219822 | 2.886470556 | down |
| Mrps26        | 0.000219822 | 2.316550255 | down |
| Timm9         | 0.000219822 | 1.986933231 | down |
| Akap1         | 0.000219944 | 2.098371983 | down |
| Stam          | 0.000221333 | 2.468398094 | down |
| Arhgef2       | 0.000223004 | 1.610099435 | down |
| Cd84          | 0.000223829 | 1.749578714 | up   |
| 9630013P03Rik | 0.000223866 | 3.472429276 | up   |
| Cacna1g       | 0.000224239 | 2.350675106 | up   |
| St6galnac4    | 0.000224306 | 1.634081125 | down |
| Wapal         | 0.000224306 | 2.071667671 | down |
| C230091E03Rik | 0.000224348 | 3.405141354 | down |
| Decr2         | 0.000225822 | 2.220481634 | down |
| Tk1           | 0.000225973 | 2.891421318 | down |
| 2810408P10Rik | 0.000226344 | 1.749534845 | down |
| 4933424B01Rik | 0.000226876 | 4.310250759 | down |
| Coil          | 0.000228256 | 2.063959837 | up   |
| Murr2         | 0.000228654 | 1.572029591 | down |
| Sfrs2         | 0.000228654 | 2.096890688 | down |
| 2310005L22Rik | 0.000229152 | 1.930631399 | down |
| Cbfa2t2       | 0.000229604 | 1.83970499  | up   |
| LOC100040961  | 0.000230951 | 2.51737237  | down |
| Nkx6-1        | 0.000232384 | 2.532574654 | up   |
| LOC638050     | 0.000232694 | 2.10479641  | up   |
| LOC628836     | 0.000232986 | 2.211776257 | down |

|                |             |             |      |
|----------------|-------------|-------------|------|
| Tle2           | 0.000232986 | 2.70662117  | up   |
| Sae1           | 0.000233036 | 4.142287254 | down |
| Rnaseh2a       | 0.000234629 | 2.288468123 | up   |
| R3hdm2         | 0.000235634 | 2.053689003 | up   |
| LOC100043181   | 0.000235882 | 1.797769785 | up   |
| EG432534       | 0.000236105 | 1.695041537 | up   |
| 4930426D05Rik  | 0.00023633  | 2.455380201 | up   |
| A430093A21Rik  | 0.00023633  | 1.889054894 | up   |
| Foxred1        | 0.00023633  | 2.407088518 | down |
| Rnf182         | 0.00023633  | 1.947802186 | down |
| Siah1b         | 0.00023633  | 1.509672284 | down |
| Wnk1           | 0.00023633  | 1.862841845 | down |
| Rbm14          | 0.000237297 | 2.344337225 | up   |
| scl0001757.1_1 | 0.000237422 | 3.968798876 | down |
| Zfp317         | 0.000237422 | 1.781011343 | down |
| C1qbp          | 0.000237723 | 2.832381725 | down |
| Ddx49          | 0.000237723 | 2.167202234 | up   |
| Kcnn3          | 0.000238409 | 26.12154007 | down |
| Ctsh           | 0.000238578 | 2.588484526 | up   |
| Golga7         | 0.000238578 | 2.295824051 | up   |
| 4921511K06Rik  | 0.000239266 | 2.137606382 | up   |
| Fam107a        | 0.000239267 | 2.543306351 | down |
| mtDNA_ND6      | 0.000239267 | 1.663390875 | up   |
| Snw1           | 0.000239267 | 1.627378225 | up   |
| Mcoln3         | 0.000239617 | 1.574297309 | down |
| Trmt2a         | 0.000239924 | 2.943390369 | down |
| A630097D09Rik  | 0.000240469 | 2.245725632 | up   |
| 5330403J18Rik  | 0.000240485 | 1.561487794 | up   |
| D930002L09Rik  | 0.000240485 | 2.907100201 | up   |
| Dnase1l1       | 0.000240485 | 1.636565328 | up   |
| EG667723       | 0.000240545 | 2.104596376 | up   |
| Orc4l          | 0.000240964 | 1.978468895 | up   |
| Arfrp1         | 0.000241076 | 1.721571922 | down |
| Fgd4           | 0.000241076 | 1.711675644 | down |
| Clspn          | 0.000241124 | 1.767380476 | down |
| ligp2          | 0.000241124 | 1.965031624 | up   |
| Fam101a        | 0.000241182 | 2.988392353 | down |
| LOC100048613   | 0.000241182 | 1.636793494 | down |
| Zfp629         | 0.000241182 | 1.707373023 | up   |
| Ggnbp1         | 0.000241256 | 1.772250533 | up   |
| C730040L01Rik  | 0.000241516 | 2.060833216 | up   |
| Kirrel3        | 0.000241724 | 1.939929843 | up   |
| scl000596.1_38 | 0.000242036 | 2.042620659 | down |
| Ddx23          | 0.000242341 | 1.651549459 | up   |
| LOC100038993   | 0.000242341 | 3.092079401 | down |
| Rnmt           | 0.000242341 | 2.56573391  | down |
| 0910001A06Rik  | 0.000242445 | 2.066383362 | down |
| Agpat3         | 0.000242445 | 1.554988265 | up   |
| Cobll1         | 0.000242445 | 1.6672225   | down |
| Iars           | 0.000242445 | 2.350120306 | down |
| Kdelr1         | 0.000243251 | 2.151457787 | up   |
| Caprin1        | 0.000243279 | 3.442944765 | down |

|               |             |             |      |
|---------------|-------------|-------------|------|
| Ikbkap        | 0.000243279 | 1.791815281 | down |
| Ddx47         | 0.000243584 | 2.545067549 | down |
| D130059P03Rik | 0.00024379  | 2.712814331 | up   |
| Gnl3          | 0.00024379  | 2.154230833 | down |
| Mrpl48        | 0.00024379  | 1.950306773 | down |
| Hpgd          | 0.000245896 | 2.150220156 | up   |
| Setx          | 0.000245971 | 1.906172633 | up   |
| Hmgcl         | 0.000246484 | 2.804630518 | down |
| Pdlim2        | 0.000246832 | 2.173926115 | down |
| A630064D23Rik | 0.000247049 | 1.939363336 | down |
| A230080D12Rik | 0.00024725  | 1.507227182 | down |
| Sh3kbp1       | 0.000247311 | 2.331632614 | down |
| Sri           | 0.000247342 | 1.731450319 | down |
| LOC384727     | 0.000247951 | 1.950770259 | up   |
| Ssbp3         | 0.000247951 | 2.159426451 | up   |
| Sufu          | 0.000248312 | 2.23089838  | up   |
| Nupl1         | 0.000249427 | 1.626747847 | down |
| 1500003E24Rik | 0.000251124 | 1.578021526 | up   |
| Slc24a2       | 0.000251124 | 1.623716593 | up   |
| Ankrd6        | 0.000252291 | 1.650712609 | down |
| Sec22a        | 0.0002528   | 4.064647198 | down |
| Eps8          | 0.000252871 | 2.723695993 | down |
| Gm1040        | 0.000252871 | 2.341539383 | down |
| Jak2          | 0.000252871 | 2.157834053 | down |
| Jazf1         | 0.000252871 | 2.499022245 | down |
| LOC100041219  | 0.000252871 | 4.021774769 | down |
| Mpv17         | 0.000252871 | 2.06839323  | down |
| Hist1h2be     | 0.000253722 | 1.672124267 | down |
| Acsl4         | 0.000254031 | 1.903488159 | up   |
| LOC385985     | 0.000254031 | 1.831303954 | up   |
| Rbm45         | 0.000254189 | 1.55312562  | down |
| D11Wsu47e     | 0.000254211 | 1.936860204 | up   |
| Ly86          | 0.000254331 | 4.478281021 | up   |
| Zfp422-rs1    | 0.000255321 | 3.085183382 | down |
| Ubxn11        | 0.000257367 | 1.5784688   | down |
| Lum           | 0.000257459 | 2.972158909 | down |
| Gak           | 0.000257655 | 1.94924736  | up   |
| BC039210      | 0.000258203 | 3.458497286 | up   |
| Eml4          | 0.000258222 | 1.754005194 | up   |
| Fxr2          | 0.000258222 | 2.355408669 | up   |
| Ube2k         | 0.000258488 | 1.606120706 | down |
| St3gal1       | 0.000259043 | 1.560395718 | down |
| Hook2         | 0.000259396 | 1.91838932  | up   |
| Taf5          | 0.000259582 | 2.115554094 | down |
| Zfp644        | 0.000260679 | 3.020000935 | down |
| Txn14b        | 0.000260862 | 1.848664045 | up   |
| Uck2          | 0.000260862 | 2.313199997 | down |
| Taf5          | 0.000260949 | 2.224843502 | down |
| Bex1          | 0.000261203 | 1.94656229  | up   |
| Smarca5       | 0.000261793 | 3.157713652 | up   |
| Sox6          | 0.000262698 | 3.285536766 | down |
| Clec4a1       | 0.000263176 | 2.431267738 | up   |

|                 |             |             |      |
|-----------------|-------------|-------------|------|
| C530044N13Rik   | 0.000263619 | 1.66377902  | up   |
| Pom121          | 0.000263619 | 2.041603327 | up   |
| Zcchc5          | 0.000264633 | 2.593349457 | down |
| 5730492I20Rik   | 0.000265424 | 1.92709291  | up   |
| Fcgrt           | 0.000265619 | 3.487201929 | up   |
| scl0001093.1_24 | 0.000266338 | 2.282047033 | up   |
| Crlf3           | 0.000266856 | 3.042374849 | down |
| Bcl11a          | 0.000267144 | 1.595377803 | up   |
| Gpam            | 0.00026768  | 1.720186472 | down |
| Col9a2          | 0.000268026 | 3.261986256 | down |
| LOC633945       | 0.000268913 | 2.131943941 | up   |
| 5430437P03Rik   | 0.000269799 | 2.609329939 | up   |
| Fyb             | 0.000270637 | 2.301314592 | up   |
| Mtfmt           | 0.000272081 | 1.839958429 | down |
| Snx9            | 0.000272313 | 1.786275148 | down |
| 2700038C09Rik   | 0.000272401 | 1.782839537 | down |
| Bat3            | 0.000272788 | 1.565569878 | up   |
| Ppcdc           | 0.000272913 | 1.588259459 | up   |
| Cat             | 0.000273567 | 1.666490912 | up   |
| Ddx42           | 0.000273856 | 2.100128412 | up   |
| Tmem111         | 0.000273856 | 2.115414381 | down |
| 6720401G13Rik   | 0.00027524  | 1.954547167 | up   |
| Ifnar2          | 0.00027524  | 1.985054493 | down |
| LOC384646       | 0.000275743 | 1.69972074  | down |
| Usp9x           | 0.000275795 | 1.864694238 | down |
| Cd200           | 0.000275905 | 2.098821878 | down |
| D930038M13Rik   | 0.00027737  | 2.106680632 | up   |
| Ddx49           | 0.000277921 | 2.63120532  | up   |
| Pctk1           | 0.000277921 | 2.52860713  | up   |
| LOC626785       | 0.000278169 | 3.180973053 | down |
| Ddx52           | 0.000278189 | 2.0785079   | down |
| Jph1            | 0.000278189 | 1.649755478 | down |
| Sh3pxd2b        | 0.000278246 | 1.652979255 | up   |
| A430099B18Rik   | 0.000278365 | 1.796834588 | down |
| Gnb2l1          | 0.000278365 | 1.892762184 | up   |
| Islr            | 0.000278365 | 2.281063557 | down |
| Slc44a2         | 0.000278365 | 4.12567997  | down |
| Asph            | 0.000279182 | 2.211745739 | down |
| Mapre3          | 0.000280988 | 2.583012819 | up   |
| Trim33          | 0.0002813   | 3.103994131 | down |
| Irf8            | 0.000282024 | 3.621077776 | up   |
| LOC100045252    | 0.000282309 | 1.658130646 | up   |
| 4832404P21Rik   | 0.000282339 | 2.251608133 | up   |
| Zfp825          | 0.000282339 | 1.752790809 | down |
| Snord22         | 0.000282763 | 1.71735704  | up   |
| Khdrbs1         | 0.000283197 | 2.394096375 | down |
| Tfpi            | 0.000283507 | 2.061903    | up   |
| Barx2           | 0.000284484 | 2.952434301 | down |
| Zfp821          | 0.000285377 | 2.140987158 | down |
| 3732409C05Rik   | 0.000285959 | 1.59789753  | up   |
| Alox12          | 0.000285959 | 3.394379854 | up   |
| Nup214          | 0.000285959 | 1.786797881 | up   |

|                 |             |             |      |
|-----------------|-------------|-------------|------|
| Runx1           | 0.000286338 | 2.467631817 | down |
| Etnk1           | 0.000286549 | 1.924120307 | down |
| Gppb1           | 0.000286549 | 1.781497479 | down |
| LOC675709       | 0.000286549 | 2.365521193 | down |
| Spast           | 0.000286549 | 1.944532991 | down |
| Tgif1           | 0.000286549 | 1.82399416  | down |
| Stab1           | 0.000286615 | 9.266456604 | up   |
| Sfxn4           | 0.000286682 | 1.678519487 | up   |
| LOC232745       | 0.000286706 | 2.384426355 | up   |
| Gemin6          | 0.000287222 | 3.889459848 | down |
| Pmm1            | 0.000287222 | 1.741164446 | down |
| 2810484G07Rik   | 0.000287373 | 5.494354725 | up   |
| Wdr92           | 0.000287373 | 1.929363251 | up   |
| 2610029G23Rik   | 0.000288029 | 2.353754759 | down |
| Col5a2          | 0.000288029 | 2.087709427 | up   |
| Cc2d1b          | 0.000289273 | 1.818840265 | up   |
| Tpp1            | 0.000289684 | 1.962062359 | up   |
| B4galt2         | 0.000289698 | 1.729569554 | up   |
| Myst4           | 0.000290586 | 1.949404359 | up   |
| Arf3            | 0.000290894 | 2.003899574 | up   |
| Mrps33          | 0.000291117 | 1.514313459 | down |
| LOC100045040    | 0.000291226 | 1.772936225 | up   |
| LOC675985       | 0.000291226 | 2.440829754 | up   |
| Slc22a5         | 0.000291932 | 2.293816567 | down |
| Actb            | 0.000292088 | 6.623762131 | up   |
| D430022A14Rik   | 0.000292088 | 3.880523205 | up   |
| Parp6           | 0.000292088 | 2.273993969 | down |
| scl0001060.1_67 | 0.000292088 | 3.482131958 | down |
| Wdr70           | 0.000292803 | 3.039543867 | down |
| Paqr3           | 0.000293801 | 2.051210642 | down |
| Gstt2           | 0.000293824 | 1.60252583  | up   |
| scl0001550.1_29 | 0.000294066 | 2.484349728 | down |
| Pdia3           | 0.000296423 | 1.618042231 | down |
| Gcnt1           | 0.000296742 | 1.885344744 | down |
| Siat5           | 0.000296742 | 2.272691727 | up   |
| Cul4a           | 0.000297025 | 2.384379625 | down |
| Psm11           | 0.000297283 | 1.839261055 | up   |
| Rc3h2           | 0.000297739 | 2.95428133  | up   |
| 2610019N13Rik   | 0.000297979 | 4.004569054 | up   |
| Aaas            | 0.000297979 | 2.296341658 | down |
| LOC629364       | 0.000298305 | 2.578338385 | down |
| 1110020N13Rik   | 0.00029939  | 1.830717802 | up   |
| 2410166I05Rik   | 0.000299859 | 2.43085599  | down |
| 5730589K01Rik   | 0.000299859 | 1.902543664 | down |
| Dusp28          | 0.000299859 | 2.033252239 | down |
| 1810027O10Rik   | 0.000300369 | 1.753481031 | up   |
| Smpd1           | 0.000301672 | 2.30628109  | down |
| 2410021H03Rik   | 0.000301779 | 1.730605006 | up   |
| A730063M14Rik   | 0.000301903 | 1.602953315 | up   |
| 6330505N24Rik   | 0.000302149 | 1.608774781 | down |
| Setd3           | 0.000302149 | 1.939419746 | up   |
| Wwc2            | 0.000302267 | 1.793375611 | up   |

|               |             |             |      |
|---------------|-------------|-------------|------|
| Nr1h3         | 0.00030255  | 2.166537046 | up   |
| Cryz          | 0.000302584 | 3.602022171 | down |
| Rbm38         | 0.000303073 | 2.121245146 | up   |
| Eif3e         | 0.000303773 | 1.82092607  | up   |
| Ccdc88b       | 0.000304919 | 3.740888596 | up   |
| 5033405K12Rik | 0.000305644 | 3.31189394  | down |
| Ccl21a        | 0.000305644 | 2.713562489 | up   |
| Psemb8        | 0.000306174 | 3.476734638 | up   |
| LOC545867     | 0.000307295 | 1.934822321 | up   |
| Kng1          | 0.000307299 | 2.542358398 | up   |
| Fpgs          | 0.000307358 | 1.864728093 | down |
| Mare          | 0.000307588 | 2.271430016 | down |
| Ttc8          | 0.000307588 | 2.469508648 | down |
| Zfp358        | 0.000307588 | 1.875130773 | up   |
| D330001D04Rik | 0.000308575 | 1.837897897 | up   |
| Aktip         | 0.000308636 | 1.555321574 | up   |
| LOC384338     | 0.000308636 | 1.64816618  | up   |
| B830012L14Rik | 0.000308922 | 2.830275536 | up   |
| LOC100045019  | 0.000309022 | 1.512602568 | up   |
| 5930412G12Rik | 0.000309617 | 1.563243985 | up   |
| ldb4          | 0.000309617 | 2.071163416 | down |
| Clec4d        | 0.000310218 | 1.903172255 | up   |
| A230005G17Rik | 0.00031238  | 1.538556814 | up   |
| Psen1         | 0.00031247  | 2.346565962 | down |
| Mterfd2       | 0.000312763 | 3.043126106 | down |
| ltpkb         | 0.000312936 | 1.975757837 | up   |
| Ing3          | 0.000313125 | 4.327756405 | down |
| Rab1          | 0.000313244 | 1.707597256 | down |
| Rbm47         | 0.000313907 | 1.734242201 | down |
| LOC668047     | 0.000314178 | 1.809623718 | up   |
| Agpat5        | 0.000314188 | 1.512766242 | up   |
| Ankrd46       | 0.000314889 | 1.752170563 | up   |
| LOC381470     | 0.000314892 | 2.462993622 | up   |
| Abi3          | 0.000314902 | 3.405496597 | up   |
| Srprb         | 0.000314902 | 1.796862006 | up   |
| Erbp2         | 0.00031517  | 2.214454889 | up   |
| Hs6st2        | 0.00031517  | 2.03786087  | down |
| 1500041J02Rik | 0.000315171 | 1.572867513 | down |
| Req           | 0.000315312 | 1.733262181 | up   |
| Zcchc9        | 0.000315404 | 2.166278601 | down |
| D930010H05Rik | 0.00031679  | 2.128490925 | up   |
| Txndc11       | 0.000316817 | 1.765415788 | down |
| Dact1         | 0.00031699  | 2.195098639 | down |
| Pitrm1        | 0.000317562 | 2.215159655 | up   |
| Toe1          | 0.000317562 | 1.666069746 | down |
| LOC383770     | 0.000317617 | 2.722924709 | up   |
| Tnip1         | 0.00031787  | 2.316067219 | up   |
| 2810408A11Rik | 0.000318744 | 1.566996336 | up   |
| Arl6          | 0.00031916  | 2.691647053 | down |
| Txlna         | 0.000320709 | 1.99551332  | up   |
| Ms4a7         | 0.000321043 | 1.795760512 | up   |
| 3200002M19Rik | 0.000321314 | 2.12908268  | down |

|               |             |             |      |
|---------------|-------------|-------------|------|
| D830019K05Rik | 0.000321314 | 4.014717102 | up   |
| Fmnl2         | 0.000321314 | 5.00082922  | down |
| Rtn4          | 0.000321314 | 3.269852638 | down |
| Ard1a         | 0.00032186  | 2.350543022 | down |
| Blk           | 0.000321874 | 3.010790348 | up   |
| Oip5          | 0.000321874 | 3.34657526  | down |
| Pma5          | 0.000321874 | 2.644881964 | up   |
| Ccna2         | 0.00032257  | 2.41788435  | up   |
| Gga2          | 0.00032257  | 3.426874638 | down |
| Pcdh17        | 0.000322609 | 1.968291402 | up   |
| Usp33         | 0.000322921 | 1.685209632 | up   |
| LOC100043040  | 0.000323462 | 1.877233267 | down |
| LOC100046895  | 0.000323913 | 2.854325295 | down |
| Mrps35        | 0.000324081 | 2.100426912 | down |
| Phtf1         | 0.000324164 | 1.711342931 | up   |
| Mcat          | 0.000324879 | 1.739663124 | down |
| Lef1          | 0.000325198 | 1.737193108 | down |
| Hbb-b1        | 0.000325283 | 6.985387325 | up   |
| Rnf11         | 0.000325283 | 3.21593833  | down |
| Selm          | 0.000325283 | 1.926374793 | up   |
| Cdc2a         | 0.000325948 | 2.363029003 | down |
| ORF19         | 0.000326039 | 1.760895491 | up   |
| Papss1        | 0.000326039 | 2.200952292 | down |
| Sla           | 0.000326039 | 2.832822084 | up   |
| Thsd4         | 0.000326175 | 2.296028614 | up   |
| Glcc1         | 0.000327833 | 1.538626552 | down |
| Apoc1         | 0.000328085 | 3.77295351  | up   |
| Mrps7         | 0.000328085 | 2.183539867 | up   |
| Tmem47        | 0.000328393 | 2.869865656 | down |
| Uba2          | 0.000328457 | 2.070644379 | down |
| 2010007H12Rik | 0.00032894  | 1.57797122  | down |
| Wee1          | 0.00032894  | 1.98002708  | up   |
| D030006P03Rik | 0.000329658 | 2.197467804 | up   |
| A230019I20Rik | 0.000331073 | 1.978691101 | down |
| Toe1          | 0.000333144 | 1.930790901 | down |
| 2900097C17Rik | 0.00033342  | 2.592229843 | down |
| Agxt2l2       | 0.00033342  | 1.594434738 | down |
| Zfp560        | 0.000334219 | 1.89592588  | down |
| Sbno1         | 0.000334322 | 2.26995492  | down |
| Ctdsp2        | 0.000334716 | 2.14193058  | up   |
| Atxn3         | 0.000335383 | 1.591643691 | down |
| Purg          | 0.000335532 | 2.246056318 | down |
| 9830144J08Rik | 0.000335736 | 1.751068831 | up   |
| Tnfrsf22      | 0.000335736 | 1.571352959 | down |
| Smarca3       | 0.000336221 | 1.585238218 | down |
| Znrf1         | 0.000336738 | 3.206128597 | up   |
| Mocs1         | 0.000337378 | 2.173587561 | down |
| Pak2          | 0.000337378 | 3.083403587 | down |
| LOC385959     | 0.00033758  | 2.97002697  | up   |
| Pnpt1         | 0.00033758  | 2.704342604 | up   |
| Stard9        | 0.00033758  | 2.727962017 | up   |
| Trmt1         | 0.000337874 | 2.112076044 | up   |

|               |             |             |      |
|---------------|-------------|-------------|------|
| 4930429O20Rik | 0.000337883 | 1.66469729  | up   |
| Map1lc3a      | 0.000338667 | 1.730258346 | down |
| Nipsnap3a     | 0.000340349 | 3.032202005 | down |
| Zbtb8os       | 0.000340349 | 2.307601929 | up   |
| 2210012G02Rik | 0.000340647 | 2.541077375 | down |
| Samhd1        | 0.000340859 | 2.077848673 | up   |
| Fndc3b        | 0.000340907 | 2.314380884 | down |
| Lman1         | 0.00034213  | 1.891891718 | down |
| Cd97          | 0.00034214  | 2.5883286   | up   |
| 2310061F22Rik | 0.000342434 | 2.166169643 | up   |
| Fkbp14        | 0.000342747 | 2.260330916 | down |
| LOC100046211  | 0.000342747 | 2.017640829 | up   |
| Mobkl2a       | 0.000342747 | 1.881973028 | down |
| Nin           | 0.000342747 | 2.095006704 | down |
| Ube2f         | 0.00034304  | 2.98213625  | down |
| Nola3         | 0.000343425 | 2.109806538 | down |
| Wdr89         | 0.000343493 | 1.835692406 | up   |
| Irf5          | 0.000343507 | 2.473683596 | up   |
| LOC100043040  | 0.000343507 | 1.890997648 | down |
| LOC100046781  | 0.000343507 | 3.458736897 | up   |
| Tcfec         | 0.000344668 | 1.795204163 | up   |
| 6330416L07Rik | 0.000344828 | 1.581730008 | up   |
| Flrt3         | 0.000344828 | 2.207974911 | up   |
| 6030400A10Rik | 0.000344987 | 1.872022748 | up   |
| LOC100040244  | 0.000345076 | 2.963864088 | down |
| Srp72         | 0.000345347 | 1.933482289 | up   |
| Pdgbp         | 0.000345525 | 2.834603071 | up   |
| Zfp566        | 0.00034575  | 1.770658374 | down |
| Nav1          | 0.00034588  | 1.721446514 | up   |
| Cxxc1         | 0.00034705  | 1.529542327 | down |
| Ptges3        | 0.000347749 | 2.520469666 | up   |
| A730017D01Rik | 0.00034777  | 2.564999819 | down |
| Zc3h8         | 0.000348173 | 1.666804075 | up   |
| Necap1        | 0.000348936 | 1.760411143 | down |
| LOC100048439  | 0.000349058 | 2.399495125 | up   |
| Kpna3         | 0.000349606 | 2.255650282 | up   |
| 9626984_5_rc  | 0.000349625 | 1.714767218 | up   |
| Tpd52l1       | 0.000349686 | 2.67099905  | down |
| A730063M14Rik | 0.000349741 | 1.726114869 | up   |
| Fkbp9         | 0.000350338 | 1.577763319 | down |
| 1500011H22Rik | 0.000350738 | 2.617086172 | down |
| 6130401L20Rik | 0.000350738 | 1.673751831 | down |
| Dncl2a        | 0.000350738 | 2.579734087 | up   |
| Hist1h2bh     | 0.000352486 | 1.928431273 | down |
| Stau1         | 0.000352537 | 1.507359505 | up   |
| D230048P18Rik | 0.000353629 | 2.699230909 | up   |
| 9030619K07Rik | 0.000353747 | 2.012353182 | up   |
| Prdm15        | 0.000353747 | 1.768582821 | up   |
| As3mt         | 0.000354043 | 2.722685814 | down |
| Cyp20a1       | 0.000354055 | 2.824159622 | down |
| Slc25a44      | 0.000354055 | 2.207317591 | up   |
| Nsun5         | 0.000354398 | 2.139414549 | down |



|                 |             |             |      |
|-----------------|-------------|-------------|------|
| Arrdc2          | 0.000355048 | 1.620995402 | up   |
| LOC100048556    | 0.000355191 | 2.948627234 | up   |
| 5031436O03Rik   | 0.000355273 | 1.886453629 | up   |
| Ednra           | 0.000355771 | 2.295722961 | up   |
| 2310007H09Rik   | 0.000356269 | 1.761750221 | down |
| Gmip            | 0.000356269 | 2.041738272 | up   |
| Gpx8            | 0.000356269 | 1.676222563 | down |
| Mybl2           | 0.000358396 | 1.677635551 | down |
| Fzd5            | 0.000360281 | 1.685383678 | down |
| Uba1            | 0.000361489 | 3.490824461 | down |
| LOC381891       | 0.000362076 | 3.267707586 | down |
| Pts             | 0.000362076 | 2.517258883 | down |
| Sfrs11          | 0.000362076 | 2.447832584 | down |
| 2810417H13Rik   | 0.000363187 | 2.476939917 | down |
| Isoc2b          | 0.000364313 | 1.540642738 | up   |
| 2210013K02Rik   | 0.000364466 | 1.75170207  | up   |
| A130065C13Rik   | 0.000364466 | 2.643453836 | up   |
| BC030307        | 0.000364466 | 1.571127296 | up   |
| Tecta           | 0.000365161 | 1.827583432 | down |
| A430070A22Rik   | 0.000366068 | 1.879307509 | up   |
| scl0001053.1_15 | 0.000366824 | 2.442828417 | down |
| Tmem119         | 0.000366824 | 1.790971875 | up   |
| D130059O18Rik   | 0.000367135 | 8.277261734 | down |
| Sf1             | 0.000367736 | 2.529525757 | up   |
| Smyd2           | 0.000367736 | 2.524350405 | down |
| Il1rap          | 0.0003678   | 1.749590874 | down |
| Slc29a3         | 0.000368532 | 1.676889062 | up   |
| F830002E14Rik   | 0.000369541 | 3.914186478 | down |
| LOC216036       | 0.000369541 | 1.957380533 | up   |
| LOC381151       | 0.000369541 | 1.694757104 | up   |
| Tshz2           | 0.000369541 | 3.209869623 | up   |
| 9130227C08Rik   | 0.000369815 | 1.924268603 | up   |
| A630001G21Rik   | 0.000369815 | 2.302196503 | up   |
| Ezh2            | 0.000369815 | 3.118177891 | down |
| Mier1           | 0.000369815 | 2.383575201 | up   |
| Plek            | 0.000369815 | 3.731998444 | up   |
| Ube2l6          | 0.000371137 | 1.839638829 | down |
| Ino80c          | 0.00037284  | 1.872328758 | down |
| Tlk2            | 0.00037284  | 2.544542074 | up   |
| Arpc1a          | 0.00037351  | 3.007030964 | down |
| Pan3            | 0.000374203 | 2.081888914 | up   |
| Birc6           | 0.000374442 | 1.661909223 | up   |
| Plekhf2         | 0.000374545 | 2.222766399 | down |
| Vkorc1l1        | 0.000374545 | 1.947618246 | down |
| Aabp3-pending   | 0.000375498 | 1.877115607 | down |
| LOC620678       | 0.000375737 | 2.31983304  | down |
| LOC668626       | 0.000375827 | 2.048596144 | up   |
| Slc25a15        | 0.000375827 | 1.543455362 | down |
| 9530031D18Rik   | 0.000375947 | 1.535835624 | up   |
| Fam118a         | 0.000376637 | 2.430905342 | down |
| Kif13b          | 0.000377855 | 1.614841342 | up   |
| scl0001069.1_12 | 0.00037857  | 1.65809226  | down |

|                |             |             |      |
|----------------|-------------|-------------|------|
| LOC226538      | 0.000379141 | 2.060730696 | up   |
| Nde1           | 0.000379148 | 3.057065487 | down |
| Trappc3        | 0.000379148 | 2.373871088 | down |
| Scn2b          | 0.000380628 | 1.706112981 | up   |
| LOC100047905   | 0.000380835 | 2.097543955 | down |
| Prune          | 0.000381357 | 1.892609477 | down |
| E130112L23Rik  | 0.000381582 | 1.7558707   | up   |
| Tom1l1         | 0.000383441 | 1.684084654 | down |
| A630007B06Rik  | 0.000383453 | 1.612574816 | down |
| Bmyc           | 0.00038349  | 2.091891527 | up   |
| Nipsnap3a      | 0.000383683 | 4.254371643 | down |
| Ctcf           | 0.000384234 | 1.702556372 | up   |
| Grasp          | 0.000384604 | 1.931490898 | down |
| Pmm2           | 0.000384758 | 2.495292187 | down |
| Ccdc56         | 0.000384759 | 1.600585938 | up   |
| Elmod3         | 0.000385016 | 1.647088766 | down |
| 6030408C04Rik  | 0.000385222 | 3.19098258  | down |
| AI428936       | 0.000385266 | 1.637246728 | up   |
| Bat3           | 0.000385266 | 1.502805352 | up   |
| Sec23ip        | 0.000385266 | 2.543583155 | down |
| Ung            | 0.000385266 | 2.298276901 | down |
| Zmynd11        | 0.000385266 | 2.895047188 | down |
| Opa1           | 0.00038522  | 1.844746113 | down |
| Shank3         | 0.000386231 | 1.616460085 | up   |
| EG434907       | 0.000386541 | 1.700354934 | down |
| Isca2          | 0.000386541 | 2.766831875 | up   |
| LOC380910      | 0.000386541 | 1.545938134 | up   |
| LOC433711      | 0.000386541 | 2.451876164 | up   |
| Plekhg4        | 0.000386565 | 1.922765732 | up   |
| Zwilch         | 0.000387038 | 2.094277859 | down |
| Sumo1          | 0.000387053 | 5.421569824 | down |
| Sumf2          | 0.000387338 | 2.313025951 | down |
| Xrcc3          | 0.000389536 | 1.766910553 | up   |
| LOC100043893   | 0.000389762 | 2.395801544 | up   |
| Fbxo18         | 0.000389923 | 2.492236137 | down |
| Prpf3          | 0.000389923 | 1.770958304 | down |
| EG232875       | 0.000390632 | 1.967683792 | down |
| Ube2b          | 0.000390632 | 1.630861521 | up   |
| Dlg2           | 0.000390814 | 1.835449576 | up   |
| Timd4          | 0.000392478 | 2.094157696 | up   |
| LOC384382      | 0.000392698 | 4.527099133 | down |
| Ndst1          | 0.000392698 | 1.803198338 | up   |
| Timeless       | 0.000392698 | 1.641578794 | up   |
| Mrpl4          | 0.000393372 | 1.661090493 | down |
| Camta1         | 0.000395935 | 2.402442694 | down |
| scl0003500.1_0 | 0.000395935 | 1.949169159 | down |
| Myo1b          | 0.000397132 | 1.891579628 | down |
| LOC100048863   | 0.000398189 | 2.380311966 | down |
| Men1           | 0.000399069 | 1.809636116 | down |
| Fech           | 0.000400261 | 1.962437391 | down |
| Ptk7           | 0.000400873 | 2.03581214  | up   |
| Nol3           | 0.000401117 | 1.623333931 | up   |

|               |             |             |      |
|---------------|-------------|-------------|------|
| A130090K04Rik | 0.000401921 | 1.913383007 | up   |
| 4121402D02Rik | 0.000403279 | 1.681304455 | up   |
| C330018D20Rik | 0.000404255 | 2.37067771  | down |
| Lamp1         | 0.000404255 | 2.232527018 | up   |
| Opa1          | 0.000404255 | 1.51439774  | down |
| Chd8          | 0.000404388 | 1.571517825 | up   |
| Cops7a        | 0.000406286 | 1.638715267 | down |
| 2900011O08Rik | 0.000406411 | 2.581374645 | down |
| Cct3          | 0.000406454 | 3.520785809 | down |
| Gtf3c5        | 0.000406454 | 1.52745831  | down |
| Ube2c         | 0.000406622 | 2.395749807 | up   |
| Tbc1d7        | 0.000407821 | 1.846446276 | down |
| Fuk           | 0.000407917 | 1.65690136  | up   |
| Pcdh12        | 0.000408667 | 2.061779022 | up   |
| Eif3i         | 0.00040888  | 2.786333084 | down |
| 9230104K21Rik | 0.000409006 | 1.534696221 | up   |
| LOC100041932  | 0.000409006 | 1.544524193 | down |
| Dnm2          | 0.000409715 | 2.15235734  | up   |
| Serf1         | 0.000409729 | 1.671014071 | up   |
| Zfp212        | 0.000409729 | 1.58041954  | down |
| Ift74         | 0.000409837 | 3.879684925 | down |
| Camkk2        | 0.000410125 | 1.752634645 | down |
| Psma1         | 0.000410134 | 6.278360844 | down |
| Bdh1          | 0.000410773 | 1.856939673 | down |
| 6530401P13    | 0.000411094 | 1.693964958 | up   |
| Slc4a8        | 0.000411607 | 1.800826907 | up   |
| EG434404      | 0.000411908 | 2.221384287 | up   |
| Mov10         | 0.000411908 | 2.067082405 | up   |
| Pofut2        | 0.000411908 | 1.859198332 | down |
| Golgb1        | 0.000412028 | 2.282741308 | up   |
| Chmp6         | 0.000412202 | 1.573580861 | up   |
| Fzd10         | 0.000415176 | 2.343730688 | down |
| Slc4a8        | 0.000415919 | 1.677034259 | up   |
| A130028M21Rik | 0.000416988 | 1.909258485 | up   |
| Zfp262        | 0.000417003 | 1.585245609 | up   |
| Rab5          | 0.00041758  | 1.91449523  | down |
| LOC100047966  | 0.000418305 | 1.591122031 | up   |
| Siah1b        | 0.000418305 | 2.295234442 | down |
| Myo1f         | 0.000419546 | 3.830625773 | up   |
| Smoc2         | 0.000420354 | 1.738443971 | down |
| 1110038H03Rik | 0.000420675 | 1.814168334 | up   |
| 6330416L11Rik | 0.000420675 | 1.954528451 | down |
| Ccdc45        | 0.000420675 | 1.977718353 | up   |
| Fam152a       | 0.000420675 | 1.883909464 | down |
| Selplg        | 0.000420675 | 3.762926102 | up   |
| Timm8b        | 0.000420675 | 2.266997099 | down |
| Wasf2         | 0.000420675 | 2.171854973 | up   |
| Ldb2          | 0.000420989 | 2.367152691 | down |
| 3830408P04Rik | 0.000422614 | 2.091636419 | up   |
| Snx25         | 0.000422689 | 1.836761713 | down |
| 2010003O02Rik | 0.000423396 | 1.794813275 | up   |
| 2210012G02Rik | 0.000423396 | 1.684122562 | down |

|                |             |             |      |
|----------------|-------------|-------------|------|
| Ankrd40        | 0.000423396 | 2.165974379 | up   |
| Hist1h2bn      | 0.000423396 | 1.608734846 | down |
| scl0003105.1_6 | 0.000423396 | 1.545620799 | down |
| Yeats4         | 0.000423396 | 3.189333439 | down |
| Rcn2           | 0.000424693 | 1.558866978 | down |
| Xpa            | 0.000425041 | 1.615720153 | down |
| D5Ert579e      | 0.000425123 | 1.683857203 | up   |
| 3010031K01Rik  | 0.000425963 | 1.666360259 | up   |
| A430106H13Rik  | 0.000426687 | 1.609847784 | up   |
| Cdr2l          | 0.000427207 | 3.26509285  | up   |
| Ubxn2a         | 0.000427329 | 1.950295568 | down |
| Akap11         | 0.000428687 | 2.361427307 | down |
| Csnk1g1        | 0.000429613 | 1.744198799 | up   |
| Msh6           | 0.000430945 | 2.01474762  | up   |
| Cd86           | 0.000431002 | 4.239417553 | up   |
| Commd6         | 0.000431002 | 1.578427196 | down |
| Rgs19          | 0.000432718 | 1.880624771 | up   |
| Nudc           | 0.000432851 | 2.195764303 | down |
| Nrsn2          | 0.000432871 | 1.524978161 | up   |
| Ptpn18         | 0.000432871 | 2.851409435 | up   |
| Slc38a9        | 0.00043348  | 2.155992031 | up   |
| LOC384538      | 0.00043566  | 2.258776188 | up   |
| Slc14a1        | 0.00043566  | 2.209163189 | down |
| Whsc1          | 0.000435845 | 1.546467185 | up   |
| Bbs12          | 0.000437551 | 1.699396372 | down |
| Dach1          | 0.000437551 | 1.550462127 | down |
| Sbsn           | 0.000437922 | 1.949364066 | up   |
| 2700084L06Rik  | 0.000438698 | 1.525933981 | up   |
| Hoxa2          | 0.000438698 | 1.682744145 | down |
| Tomm34         | 0.000439583 | 1.965200901 | down |
| Evi2a          | 0.000440276 | 2.567021608 | up   |
| Gng10          | 0.000440944 | 4.194810391 | down |
| Herpud2        | 0.000440944 | 2.4964993   | down |
| Spag4          | 0.000440944 | 1.775084257 | up   |
| Tcf25          | 0.000441012 | 2.250073195 | up   |
| Ppp1r9b        | 0.000441257 | 2.3627038   | up   |
| Zfp191         | 0.000441257 | 2.150001049 | down |
| Eif1           | 0.000441803 | 1.80425787  | up   |
| Cd34           | 0.000441876 | 1.728933096 | up   |
| Mdh2           | 0.000441876 | 2.134009838 | up   |
| Acadm          | 0.000441927 | 2.481151104 | down |
| BC059177       | 0.000441927 | 1.875171661 | up   |
| Eya1           | 0.000443308 | 4.272898674 | down |
| Npc1           | 0.000443308 | 1.648896575 | up   |
| Sra1           | 0.000443511 | 1.922546625 | down |
| 9630050P21Rik  | 0.000443675 | 1.524461627 | up   |
| Cdc25c         | 0.000443794 | 2.524695873 | down |
| Muc1           | 0.000443794 | 2.351823568 | up   |
| 4930452G13Rik  | 0.000444057 | 1.554724097 | down |
| Trip12         | 0.000445935 | 2.378634691 | up   |
| Mint-pending   | 0.00044594  | 1.67340982  | up   |
| 1110018J18Rik  | 0.000446379 | 2.577937365 | down |

|               |             |             |      |
|---------------|-------------|-------------|------|
| Ppm1g         | 0.000446845 | 1.966290712 | down |
| Mobk13        | 0.000448863 | 3.029410124 | down |
| Ms4a6d        | 0.000450948 | 2.168563128 | up   |
| 9430090101Rik | 0.000451253 | 1.704425693 | down |
| Spcs1         | 0.000451253 | 2.627771854 | down |
| Ensa          | 0.000451737 | 1.533009887 | down |
| Col24a1       | 0.00045244  | 1.953402638 | down |
| Exo1          | 0.000452637 | 1.9862535   | down |
| Acy1          | 0.000452779 | 1.847133756 | up   |
| Por           | 0.000452779 | 1.717088819 | up   |
| Lst1          | 0.000453598 | 5.938450337 | up   |
| Dhx40         | 0.00045389  | 1.63516438  | up   |
| Pk3           | 0.00045389  | 1.670704246 | up   |
| Pml           | 0.000454123 | 1.512720943 | up   |
| Clcc1         | 0.000455068 | 1.603530645 | down |
| LOC622655     | 0.000455206 | 2.985795975 | down |
| Kctd12b       | 0.000455634 | 2.037118673 | up   |
| Gprc5b        | 0.000456187 | 1.902659774 | down |
| Azi1          | 0.000456336 | 2.047650099 | up   |
| Mrpl48        | 0.000456426 | 2.831741333 | down |
| BC057627      | 0.000457896 | 1.659686327 | up   |
| Fam158a       | 0.000458866 | 2.143752337 | up   |
| LOC100045419  | 0.000458901 | 1.782004237 | up   |
| Inpp5d        | 0.000459037 | 2.931461573 | up   |
| 8030447N19Rik | 0.000459063 | 1.677915335 | up   |
| Hbb-y         | 0.000461594 | 16.54873848 | up   |
| Plat          | 0.000461744 | 1.612457633 | down |
| Slc8a1        | 0.000462082 | 1.785566211 | up   |
| Wbp11         | 0.000462082 | 1.851758361 | down |
| Jmjd2a        | 0.000462267 | 2.798635006 | down |
| 1200003C05Rik | 0.00046232  | 2.758332968 | down |
| Bcl11a        | 0.00046232  | 1.969925761 | up   |
| Fut8          | 0.00046232  | 2.135364533 | down |
| Gm1614        | 0.00046232  | 2.174597263 | up   |
| Asph          | 0.000462575 | 2.216856718 | down |
| Tns4          | 0.000464167 | 1.763277054 | up   |
| Bcl2a1a       | 0.000466046 | 2.184137106 | up   |
| Gabpb1        | 0.000466105 | 2.331307411 | down |
| E030022B18Rik | 0.000466169 | 1.974462867 | up   |
| 2700022B06Rik | 0.000466827 | 2.045573473 | up   |
| Plscr1        | 0.000467354 | 2.588473558 | down |
| Ccdc43        | 0.000467961 | 2.236897945 | up   |
| Susd5         | 0.000467961 | 1.583449841 | down |
| Zcchc8        | 0.000468027 | 1.764305949 | up   |
| Cox7b         | 0.00046855  | 1.761149645 | up   |
| Frm4b         | 0.00046855  | 1.907487989 | up   |
| Zmym3         | 0.00046855  | 1.802528262 | up   |
| Pbx3          | 0.000468928 | 2.450549364 | down |
| Ttc3          | 0.000469252 | 1.653300285 | down |
| Usp4          | 0.000469378 | 1.959793687 | up   |
| 1110004F10Rik | 0.000469478 | 1.886386275 | up   |
| Trmt6         | 0.000470666 | 1.822036982 | up   |

|               |             |             |      |
|---------------|-------------|-------------|------|
| 5430417J04Rik | 0.000471163 | 3.432449818 | down |
| Hdac11        | 0.000471379 | 1.870505929 | up   |
| Mageh1        | 0.000471379 | 3.569683075 | down |
| Kpnb1         | 0.000472081 | 2.2443676   | up   |
| Zfp429        | 0.00047331  | 1.911138058 | down |
| 2900022P04Rik | 0.000473574 | 2.956163406 | up   |
| 7330409M10Rik | 0.000473574 | 1.581189513 | up   |
| Ube1c         | 0.000475895 | 1.848529577 | down |
| C130007D14    | 0.000476283 | 1.629169345 | up   |
| Macf1         | 0.000477317 | 1.973552108 | up   |
| D11Wsu47e     | 0.000477433 | 2.241953373 | up   |
| 2900010J23Rik | 0.000477476 | 1.735701084 | up   |
| Gstm2         | 0.000477476 | 2.143873453 | down |
| Stat2         | 0.000477476 | 1.589756489 | up   |
| LOC278188     | 0.000477663 | 1.743216157 | up   |
| Ywhaz         | 0.000477663 | 2.80567503  | up   |
| Cdc123        | 0.000478586 | 2.016777039 | up   |
| Rfc3          | 0.000478586 | 1.708070159 | down |
| Tnni3         | 0.000479565 | 1.505256653 | up   |
| BC042423      | 0.000479943 | 2.574317217 | up   |
| Lgals3bp      | 0.000480158 | 3.041846037 | up   |
| Fbxl8         | 0.000480856 | 1.588386655 | up   |
| 4921537F17Rik | 0.000481722 | 1.505080462 | down |
| Fam178a       | 0.000481722 | 1.917191505 | up   |
| Mbtd1         | 0.000481722 | 1.966357231 | up   |
| Sox5          | 0.00048174  | 8.529214859 | down |
| EG384770      | 0.0004823   | 1.73527801  | down |
| 1810009O10Rik | 0.000482481 | 2.56532383  | down |
| Gas2l1        | 0.000483652 | 1.992506266 | up   |
| Clcn2         | 0.000484076 | 2.045736313 | up   |
| Zbtb5         | 0.000484076 | 1.578484535 | up   |
| Aars2         | 0.000484554 | 1.886784554 | up   |
| Al849286      | 0.000484554 | 1.696458578 | up   |
| 2410015N17Rik | 0.000485144 | 1.686324716 | up   |
| Emd           | 0.000485144 | 3.765258789 | down |
| Mettl4        | 0.000485144 | 1.590278506 | down |
| Tera-pending  | 0.000485144 | 3.131609917 | down |
| Uap1          | 0.000485548 | 1.807563782 | down |
| D16Bwg1494e   | 0.000485603 | 1.577403069 | up   |
| Cspg4         | 0.000486174 | 1.713827133 | down |
| Nudt9         | 0.00048646  | 1.657863975 | down |
| Rab8b         | 0.00048646  | 1.745767474 | down |
| 2210414L08Rik | 0.000488328 | 1.874861717 | up   |
| EG434078      | 0.000488693 | 1.517744184 | down |
| B230399E16Rik | 0.000489015 | 1.875124931 | up   |
| LOC236294     | 0.000490485 | 1.541718364 | down |
| Adam32        | 0.00049152  | 1.912282109 | up   |
| Bcr           | 0.000493116 | 2.038388491 | up   |
| Col27a1       | 0.000493116 | 2.459280014 | down |
| Pxn           | 0.000493116 | 1.854892135 | up   |
| Stk25         | 0.000493116 | 2.02084899  | down |
| Polr3gl       | 0.000493643 | 1.515915394 | down |

|                       |             |             |      |
|-----------------------|-------------|-------------|------|
| Col4a1                | 0.000494259 | 3.014300823 | up   |
| Nosip                 | 0.000494259 | 1.728900671 | down |
| Csmd3                 | 0.000496383 | 1.743965507 | up   |
| Gprc5c                | 0.00049804  | 1.778364897 | up   |
| E230024I19Rik         | 0.000498321 | 1.930791497 | up   |
| LOC381873             | 0.000498321 | 1.979355335 | down |
| Tsc2                  | 0.000498582 | 2.261884451 | up   |
| Ranbp10               | 0.000499091 | 1.830679178 | up   |
| LOC386002             | 0.000499099 | 1.59231317  | up   |
| scl000805.1_121       | 0.000499099 | 1.888085246 | up   |
| Glt25d2               | 0.000499923 | 1.897881746 | down |
| Stk36                 | 0.000499923 | 1.802004814 | up   |
| Vcan                  | 0.000500393 | 5.157835484 | down |
| Abhd11                | 0.0005006   | 2.076901913 | up   |
| Gstm4                 | 0.000501075 | 1.910265923 | up   |
| Ctnn                  | 0.000501494 | 3.115800142 | down |
| Tbc1d7                | 0.000501494 | 2.657574415 | down |
| Arpc1a                | 0.000502014 | 2.072750092 | down |
| 2700032M20Rik         | 0.000502038 | 1.524716735 | down |
| Nup98                 | 0.000502545 | 1.658284545 | down |
| D930029E11Rik         | 0.000502934 | 2.299012423 | up   |
| Cuta                  | 0.00050357  | 1.595215082 | up   |
| Trem2                 | 0.000504071 | 4.510470867 | up   |
| Fbxl6                 | 0.000504182 | 1.515978575 | up   |
| Rps6kb1               | 0.000504182 | 2.289428473 | down |
| Glt8d2                | 0.000504325 | 1.547719836 | down |
| Tmem33                | 0.000505915 | 1.679704547 | down |
| Gpnb                  | 0.000506459 | 2.243941784 | up   |
| Zmpste24              | 0.000508061 | 1.983035088 | down |
| Slc35f5               | 0.000508911 | 1.848781109 | up   |
| Rpl35                 | 0.000509108 | 1.512959957 | down |
| Hcfc2                 | 0.000510417 | 2.133659601 | down |
| Clock                 | 0.000510509 | 1.502933264 | down |
| Vti1b                 | 0.000510509 | 1.529601574 | down |
| 2410004L22Rik         | 0.000512562 | 1.53736639  | up   |
| 9030420J04Rik         | 0.000512911 | 1.744208098 | down |
| Zfp113                | 0.000512911 | 2.064691067 | up   |
| Dpm1                  | 0.000513191 | 1.527532697 | up   |
| N4wbp5-pending        | 0.000513191 | 1.814655066 | down |
| Rab28                 | 0.000513191 | 2.852120638 | down |
| Alg5                  | 0.00051503  | 1.831722021 | down |
| Antxr2                | 0.000516232 | 1.527885675 | up   |
| scl0001371.1_19       | 0.000516469 | 1.821559906 | down |
| LOC545396             | 0.000516702 | 1.68913734  | up   |
| Rpl27a                | 0.00051714  | 2.237522602 | down |
| Tpd52                 | 0.00051714  | 1.524386525 | up   |
| A630002D19Rik         | 0.000517243 | 1.903132081 | up   |
| scl000055.1_1_REVCOMP | 0.000517243 | 1.563292146 | up   |
| 4632427E13Rik         | 0.000517256 | 2.102860928 | down |
| Kat2b                 | 0.000517256 | 1.707809448 | down |
| Synpo                 | 0.000517528 | 1.684028506 | down |
| Ing4                  | 0.000517807 | 2.079653978 | up   |

|                 |             |             |      |
|-----------------|-------------|-------------|------|
| Impa1           | 0.000517891 | 2.390791893 | up   |
| 9430034F23Rik   | 0.000518372 | 1.673377633 | up   |
| A930009K04Rik   | 0.000518372 | 2.099366427 | up   |
| Oas1g           | 0.000518613 | 2.206003428 | up   |
| Sphk2           | 0.000518613 | 2.187416554 | up   |
| Agrp            | 0.000520047 | 1.536401153 | up   |
| Eef1b2          | 0.000520867 | 1.821775913 | down |
| 4732471D19Rik   | 0.000521111 | 1.845188737 | down |
| Cnih4           | 0.000521441 | 2.200380802 | up   |
| Cct7            | 0.000523201 | 1.712223649 | up   |
| Pon3            | 0.000523201 | 1.707502484 | up   |
| B930096H04Rik   | 0.000523222 | 1.654890776 | down |
| Zfp286          | 0.000524841 | 2.811438799 | up   |
| Vill            | 0.00052516  | 2.05437851  | down |
| 9530055J05Rik   | 0.000526206 | 1.589450836 | up   |
| 1500032P08Rik   | 0.000526668 | 2.218639612 | up   |
| Clpx            | 0.000526668 | 1.604758024 | down |
| Coasy           | 0.000526668 | 1.898323655 | up   |
| Zfc3h1          | 0.00052669  | 1.60190773  | down |
| Dctn3           | 0.000527164 | 2.503374577 | down |
| Aprt            | 0.000527486 | 1.606891871 | up   |
| Zfp711          | 0.000527675 | 1.90284586  | up   |
| Atp13a3         | 0.000529676 | 1.762229323 | down |
| Unc45a          | 0.000529981 | 2.227968216 | up   |
| BC023882        | 0.000532165 | 1.591169238 | up   |
| Mtap1b          | 0.000532165 | 4.394807816 | down |
| 6330503C17Rik   | 0.000534569 | 1.68778348  | down |
| Sf3b3           | 0.000535026 | 1.603064299 | up   |
| Map1lc3b        | 0.000535731 | 1.616287947 | up   |
| Mar-06          | 0.000535863 | 4.818675518 | down |
| A130096D14Rik   | 0.000535876 | 2.355529785 | up   |
| 1500032D16Rik   | 0.000537693 | 1.862724304 | down |
| Lect1           | 0.000537693 | 1.574525833 | down |
| E230027K01Rik   | 0.000537848 | 3.004428387 | down |
| Ncapg           | 0.000537848 | 1.624418378 | up   |
| Tbc1d8          | 0.000537848 | 2.058531761 | up   |
| BC023179        | 0.000538041 | 1.710401177 | down |
| Pcdhb21         | 0.000539031 | 1.847582459 | up   |
| Coq5            | 0.000539278 | 2.606654406 | down |
| Pik3cg          | 0.000539292 | 3.150170565 | up   |
| Aff1            | 0.000539391 | 2.008762598 | up   |
| Atic            | 0.000539391 | 1.716966033 | down |
| Dab2ip          | 0.000539391 | 1.777291298 | down |
| Gm1815          | 0.000539391 | 2.21323967  | up   |
| Tor2a           | 0.000539391 | 1.609770656 | down |
| 1600002O04Rik   | 0.000539945 | 1.53888607  | up   |
| Renbp           | 0.000539969 | 2.295560837 | up   |
| Birc5           | 0.000540201 | 3.050485134 | down |
| scl0003598.1_52 | 0.00054063  | 5.654876232 | down |
| Slc7a3          | 0.000540954 | 1.735735536 | down |
| Tbn-pending     | 0.000541055 | 1.63851428  | up   |
| C920004C08Rik   | 0.000541243 | 2.625163794 | up   |



|                 |             |             |      |
|-----------------|-------------|-------------|------|
| Trrap           | 0.000541243 | 2.362481117 | up   |
| 6430573F11Rik   | 0.000541806 | 1.823604465 | down |
| Rnf185          | 0.000543896 | 1.994016171 | down |
| LOC210245       | 0.000545277 | 1.577197075 | down |
| 2410013I23Rik   | 0.000545615 | 1.717621088 | down |
| Tbp             | 0.000545615 | 1.904569268 | down |
| Pde6d           | 0.000546345 | 2.121124744 | down |
| Slc10a7         | 0.000546345 | 1.822438002 | down |
| Ankrd54         | 0.000546354 | 2.007191658 | down |
| F11r            | 0.000546382 | 1.787222028 | up   |
| LOC241621       | 0.000546714 | 1.893705845 | down |
| 2210419D22Rik   | 0.000547091 | 1.778120875 | up   |
| Cdc14b          | 0.000547485 | 1.717513919 | down |
| Fahd2a          | 0.000547485 | 1.745841861 | down |
| Trim33          | 0.000547485 | 3.768191814 | down |
| 1700034H14Rik   | 0.000548186 | 2.242739677 | down |
| scl0001650.1_34 | 0.00054927  | 1.736213446 | up   |
| Ranbp9          | 0.000550257 | 3.332662821 | down |
| Fgfr1op2        | 0.000550402 | 1.916746616 | down |
| Gnpat           | 0.000550402 | 1.954355121 | up   |
| Tekt2           | 0.000550703 | 2.296439171 | up   |
| 3010015F07Rik   | 0.000553122 | 1.886523485 | down |
| Serp1           | 0.000553251 | 1.781548262 | up   |
| C230071H17Rik   | 0.000554144 | 2.311736822 | up   |
| Kif1b           | 0.000554409 | 1.772361517 | down |
| Pigc            | 0.000555064 | 1.735895395 | down |
| Srpx            | 0.000555064 | 2.520544291 | down |
| 4930522P08Rik   | 0.00055707  | 1.789220572 | up   |
| lpo4            | 0.000557698 | 1.585484743 | up   |
| EG666668        | 0.000558225 | 2.281493187 | up   |
| LOC100046670    | 0.000558225 | 1.762299061 | up   |
| Ndufs2          | 0.000558225 | 2.269294024 | down |
| Slc30a4         | 0.000558225 | 1.504087567 | up   |
| Ror1            | 0.000558413 | 1.958731175 | down |
| Stam2           | 0.000558413 | 1.636899948 | down |
| Zbtb25          | 0.000558413 | 1.616133094 | down |
| Cib2            | 0.000558458 | 1.576177001 | up   |
| Metap1          | 0.000558458 | 2.237871409 | up   |
| BC057893        | 0.000558675 | 1.822098255 | up   |
| Crls1           | 0.000558848 | 2.040552378 | down |
| Smc3            | 0.000559829 | 2.958533287 | down |
| LOC669168       | 0.000560017 | 1.767401695 | up   |
| Peg3            | 0.000560329 | 1.969079375 | down |
| scl0002154.1_16 | 0.000560732 | 2.049314022 | down |
| Adal            | 0.000562472 | 1.82520473  | down |
| Fam108b         | 0.000563209 | 2.886203051 | down |
| Sec24c          | 0.000564105 | 2.337723732 | up   |
| Psmb7           | 0.000564349 | 3.241960049 | down |
| Slc14a1         | 0.000564397 | 1.935239077 | down |
| Perld1          | 0.000564809 | 1.56216228  | up   |
| Csda            | 0.00056525  | 2.485371828 | down |
| C130015E15Rik   | 0.000565251 | 2.043146133 | up   |

|               |             |             |      |
|---------------|-------------|-------------|------|
| LOC100043313  | 0.000565251 | 3.332410812 | down |
| LOC384710     | 0.000565781 | 2.542629242 | up   |
| Tmem98        | 0.000565831 | 1.540804029 | down |
| B230339M05Rik | 0.000567234 | 1.886345983 | down |
| Hbb-bh1       | 0.000567234 | 8.627151489 | up   |
| Actb          | 0.000567758 | 3.328948975 | up   |
| A830007P12Rik | 0.000568515 | 3.081991673 | up   |
| Adamts19      | 0.000568515 | 1.678140163 | down |
| Clec2e        | 0.000568515 | 1.533934116 | up   |
| Rai12         | 0.000568515 | 1.985285997 | down |
| Slfn2         | 0.000568515 | 2.069435835 | up   |
| Tmed9         | 0.000568515 | 3.611918688 | down |
| Hdac4         | 0.000569221 | 1.829596639 | up   |
| Atg10         | 0.000569692 | 2.110445023 | down |
| Hoxb3         | 0.000569692 | 2.809591055 | up   |
| Pex6          | 0.000569692 | 1.702731133 | down |
| Lama5         | 0.000569816 | 1.521775484 | up   |
| LOC383916     | 0.00057024  | 1.8674016   | down |
| Asph          | 0.00057034  | 2.434479952 | down |
| C630012L17Rik | 0.00057034  | 1.680696011 | up   |
| Ccrl1         | 0.00057034  | 1.720517874 | down |
| Rpl29         | 0.00057034  | 2.101823807 | down |
| Zscan22       | 0.00057064  | 1.666167259 | down |
| Ramp3         | 0.000570835 | 1.764449358 | down |
| Xpc           | 0.000570835 | 2.508820295 | up   |
| LOC100045890  | 0.000571026 | 2.286283016 | down |
| Best1         | 0.000572491 | 1.885774732 | up   |
| Gfpt2         | 0.000573797 | 2.037197352 | down |
| Ttc8          | 0.000573839 | 2.16131115  | down |
| LOC676672     | 0.000573908 | 2.361418009 | down |
| Centd3        | 0.000577352 | 2.486511469 | up   |
| Asph          | 0.000579218 | 1.967881799 | down |
| Zfp703        | 0.000579218 | 1.959989905 | up   |
| Cant1         | 0.000579598 | 1.63429606  | down |
| Nthl1         | 0.000580107 | 1.620528221 | up   |
| Apoe          | 0.000580302 | 4.812194824 | up   |
| Tcfe3         | 0.000580302 | 2.148245335 | up   |
| Trappc3       | 0.000580302 | 3.298223019 | down |
| Rnf34         | 0.000580572 | 1.995469213 | down |
| Lonp2         | 0.00058146  | 1.659163117 | up   |
| LOC386330     | 0.000582638 | 2.845326424 | up   |
| Tspan2        | 0.000582638 | 2.072137594 | down |
| Rbm16         | 0.000583236 | 2.05564642  | up   |
| 3110079O15Rik | 0.000584793 | 4.763119698 | down |
| Gmfg          | 0.000584793 | 3.829207659 | up   |
| Sin3a         | 0.000584793 | 1.799347878 | up   |
| A330075M08Rik | 0.000584955 | 1.512390614 | up   |
| LOC218617     | 0.000585159 | 3.31820631  | up   |
| Dnhd1         | 0.000585403 | 1.560232639 | up   |
| Rbm18         | 0.000585403 | 2.138007641 | down |
| Cdc42ep3      | 0.00058608  | 1.739342928 | down |
| Sdccag1       | 0.000586433 | 1.543614745 | down |

|               |             |             |      |
|---------------|-------------|-------------|------|
| Ubx7          | 0.000586693 | 2.770376444 | down |
| Srrd          | 0.000587074 | 1.603800893 | up   |
| Mex3a         | 0.000588057 | 1.618872047 | down |
| LOC385461     | 0.00058834  | 1.75891304  | down |
| Mgl2          | 0.00058916  | 2.140232325 | up   |
| 4833420G17Rik | 0.000589681 | 1.845589399 | up   |
| Arhgap9       | 0.000589936 | 2.086451769 | up   |
| Chmp1a        | 0.000589936 | 1.654444218 | up   |
| Dph2          | 0.000589936 | 1.806661606 | down |
| Dnajc12       | 0.000591924 | 1.854585886 | down |
| Ankrd13a      | 0.00059268  | 2.379570961 | up   |
| Brca1         | 0.000593465 | 1.582286358 | up   |
| D130020G16Rik | 0.000593465 | 2.072193861 | up   |
| Gpld1         | 0.000594402 | 1.722920895 | up   |
| C230021P08Rik | 0.000598792 | 1.664154768 | up   |
| 5730427M17Rik | 0.000598802 | 2.054805994 | up   |
| Swap70        | 0.000599406 | 1.588020086 | down |
| Fam114a2      | 0.000599661 | 1.651664257 | up   |
| Fam152a       | 0.000599661 | 1.817336321 | down |
| Rabggtb       | 0.000599775 | 1.605100751 | down |
| Atp6v0e       | 0.000601465 | 1.697702408 | down |
| Ctsc          | 0.000601465 | 1.590392351 | up   |
| Lyz2          | 0.000602121 | 3.05488348  | up   |
| Brd8          | 0.000602371 | 1.986169934 | down |
| LOC100043126  | 0.000603692 | 1.935382366 | down |
| Lats2         | 0.000604515 | 1.704494596 | down |
| EG625917      | 0.000604595 | 1.551429033 | down |
| Csnk1a1       | 0.000605084 | 1.780482173 | up   |
| Txndc10       | 0.000605753 | 1.9602952   | down |
| Snf8          | 0.000606858 | 2.43382144  | up   |
| Rad21         | 0.000607144 | 3.052485943 | up   |
| Ccdc102a      | 0.000607423 | 1.641477823 | up   |
| 5930405F01Rik | 0.000608812 | 2.653104544 | up   |
| 6820427D17Rik | 0.000608812 | 2.838063955 | up   |
| Tln1          | 0.000610507 | 1.925719976 | up   |
| Abca1         | 0.00061226  | 2.23241663  | up   |
| 4933425L03Rik | 0.000612606 | 1.563069344 | up   |
| Ern1          | 0.000612606 | 2.340700626 | up   |
| Rad51         | 0.000614208 | 2.365881681 | down |
| B230361I03Rik | 0.000614938 | 2.100525856 | up   |
| D030035F05Rik | 0.000614938 | 2.997986794 | down |
| Angptl1       | 0.000615072 | 2.244338512 | down |
| Nol14         | 0.000615072 | 1.579216361 | up   |
| Hs3st3a1      | 0.000615345 | 1.850928664 | down |
| Scube1        | 0.000615345 | 2.461768389 | up   |
| Il15          | 0.000615866 | 2.160155296 | up   |
| 0610011F06Rik | 0.000616083 | 1.837564826 | down |
| Dhx15         | 0.000616083 | 1.696081638 | up   |
| Gca           | 0.000616083 | 1.895457029 | up   |
| LOC100040573  | 0.000616235 | 1.635168791 | down |
| Ap1s2         | 0.000616439 | 2.67610836  | down |
| Folr2         | 0.00061666  | 3.017388582 | up   |

|                |             |             |      |
|----------------|-------------|-------------|------|
| Lgr5           | 0.00061666  | 2.284122944 | down |
| LOC381330      | 0.00061666  | 1.626481056 | up   |
| Galnt1         | 0.000617264 | 2.181607246 | down |
| Kctd3          | 0.000617264 | 1.942064524 | up   |
| Tspan14        | 0.0006185   | 1.533150673 | down |
| Rffl           | 0.000618773 | 1.826322436 | down |
| E230017J10Rik  | 0.000619526 | 1.541134834 | down |
| scl0004166.1_8 | 0.000619758 | 2.012847185 | down |
| LOC100041504   | 0.000619839 | 2.407474518 | up   |
| LOC100046746   | 0.000619839 | 1.517947078 | down |
| Cacna1g        | 0.000620251 | 1.548339129 | up   |
| Tmem49         | 0.000621331 | 1.616242886 | down |
| Accn3          | 0.000622218 | 1.816321254 | up   |
| Trnt1          | 0.000622491 | 2.487767458 | down |
| Cth            | 0.000623099 | 1.798004508 | down |
| 2210010B09Rik  | 0.000623415 | 1.663601279 | down |
| BC019684       | 0.000623415 | 1.557382822 | up   |
| Sox5           | 0.000623415 | 4.999372006 | down |
| Stac2          | 0.000623545 | 1.764598489 | up   |
| 3830430K15Rik  | 0.000623805 | 2.569350004 | down |
| Abcg2          | 0.000623805 | 1.603134394 | up   |
| AI931714       | 0.000624735 | 1.926783204 | up   |
| Ccdc47         | 0.000624868 | 1.879818201 | down |
| Zfp367         | 0.000624887 | 3.066204786 | down |
| E430003J01Rik  | 0.000625443 | 2.550664425 | up   |
| Kctd6          | 0.000625443 | 1.924386501 | down |
| Lemd2          | 0.000625443 | 1.799606681 | up   |
| Hexa           | 0.000627026 | 2.404296875 | up   |
| Gja4           | 0.000627179 | 2.262559414 | up   |
| Irf1           | 0.000627179 | 1.529480338 | up   |
| 1700001C14Rik  | 0.000627567 | 3.176829815 | up   |
| 2810408M09Rik  | 0.000628598 | 1.580203891 | down |
| Fis1           | 0.000628598 | 2.051882505 | down |
| LOC100046500   | 0.000628598 | 2.027537346 | down |
| LOC668492      | 0.000628598 | 2.055921555 | down |
| Axot           | 0.000630219 | 1.821802855 | up   |
| Ech1           | 0.000631515 | 1.582007647 | up   |
| Eef1d          | 0.000632213 | 2.400441408 | down |
| LOC100045343   | 0.000632213 | 1.699151516 | down |
| Tac1           | 0.000632213 | 1.699343801 | down |
| Erlin2         | 0.000632276 | 2.231492758 | down |
| Tmem50b        | 0.000634792 | 1.701231003 | down |
| Tspan6         | 0.000635591 | 1.77331996  | down |
| 2410137F16Rik  | 0.000637119 | 1.593349218 | up   |
| Gng11          | 0.000638233 | 1.563430667 | up   |
| 4833438J18Rik  | 0.000639143 | 1.676720262 | up   |
| Glt28d1        | 0.000639308 | 2.084573746 | down |
| Slmap          | 0.000639734 | 2.174184561 | down |
| Uchl5          | 0.000639734 | 3.473177195 | down |
| Tmem33         | 0.000639923 | 4.580630302 | down |
| Ophn1          | 0.000640416 | 2.431102037 | up   |
| 4733401A01Rik  | 0.000640479 | 2.226837874 | up   |

|                 |             |             |      |
|-----------------|-------------|-------------|------|
| 6332415K15Rik   | 0.000640479 | 1.630011678 | up   |
| E4f1            | 0.000640479 | 1.672245145 | up   |
| Wins2           | 0.000640479 | 1.885013223 | down |
| Zfp521          | 0.000642601 | 2.007312298 | down |
| Tmcc2           | 0.000645878 | 1.511455655 | up   |
| Nudt5           | 0.000645977 | 2.207942009 | down |
| Rarb            | 0.000646429 | 2.411809683 | down |
| Syne2           | 0.000646429 | 1.566098332 | up   |
| 1110012L19Rik   | 0.000646612 | 1.992346644 | down |
| Smc1a           | 0.000646612 | 1.786191225 | down |
| Thap3           | 0.000646876 | 1.733524919 | up   |
| Hspa5           | 0.000647488 | 1.969208121 | up   |
| B130018F13Rik   | 0.0006493   | 2.053495407 | up   |
| Ctps            | 0.0006493   | 3.44703579  | down |
| Golim4          | 0.0006493   | 2.615051508 | down |
| LOC100045617    | 0.0006493   | 7.316029072 | down |
| Actc1           | 0.000650134 | 2.146131516 | up   |
| EG627352        | 0.000651345 | 2.949555397 | up   |
| Rcan1           | 0.000651345 | 3.088190079 | down |
| Dnajc24         | 0.000651594 | 2.561006069 | down |
| Rbm10           | 0.000652691 | 2.561630964 | down |
| Pigk            | 0.000653385 | 1.948712707 | down |
| Wbscr17         | 0.000653472 | 2.079356194 | up   |
| LOC100047226    | 0.000653816 | 2.728532791 | down |
| BC031575        | 0.00065393  | 2.428025723 | up   |
| Ptpn21          | 0.000654389 | 1.709312081 | up   |
| G430095P16Rik   | 0.000656061 | 1.753244758 | up   |
| Prkar2a         | 0.000656061 | 1.984657645 | up   |
| Rabif           | 0.000656061 | 2.122191668 | down |
| Trappc2         | 0.000658751 | 3.292268992 | down |
| Zfp78           | 0.000658751 | 1.636246562 | down |
| BC038156        | 0.000659578 | 1.909920931 | down |
| Lrp1            | 0.000661608 | 1.784999251 | up   |
| Braf            | 0.000663285 | 1.545936108 | up   |
| Zfp708          | 0.000663315 | 1.72842598  | down |
| Mapkapk2        | 0.000663693 | 1.712990046 | up   |
| Mrpl12          | 0.000663693 | 1.74193573  | up   |
| Zfp277          | 0.000663693 | 1.587198973 | down |
| Nup54           | 0.000664038 | 2.326942205 | down |
| LOC100045679    | 0.000664809 | 2.104789257 | up   |
| Chek1           | 0.000664872 | 1.873754978 | down |
| D17H6S56E-5     | 0.000664872 | 1.763670445 | down |
| F630047D10Rik   | 0.000664872 | 1.755932212 | up   |
| Pcyt2           | 0.000664872 | 1.778467178 | down |
| Pecr            | 0.000664872 | 1.713209152 | up   |
| scl0001055.1_43 | 0.000664872 | 1.618322372 | down |
| Ncf2            | 0.000665109 | 7.074065685 | up   |
| Scrg1           | 0.00066676  | 1.8617239   | down |
| Mrg1a           | 0.000667822 | 1.653525353 | down |
| BC006779        | 0.000668177 | 1.613143325 | up   |
| 1810011H11Rik   | 0.000668579 | 2.079060555 | up   |
| Rod1            | 0.000668589 | 1.775390625 | up   |

|                |             |             |      |
|----------------|-------------|-------------|------|
| Sec22b         | 0.00066919  | 1.934768319 | down |
| 9630045H20Rik  | 0.0006692   | 1.985624194 | up   |
| Sep-06         | 0.000669405 | 2.151334286 | up   |
| LOC100044636   | 0.000669405 | 1.563802123 | up   |
| LOC100047674   | 0.000669405 | 1.538498282 | down |
| Ntng1          | 0.000669405 | 1.566989303 | up   |
| Hdgf           | 0.000669933 | 1.980574608 | up   |
| Jak3           | 0.000669933 | 1.966042757 | up   |
| Galns          | 0.000670296 | 1.895004988 | up   |
| Idua           | 0.000671331 | 1.696261525 | down |
| A030007L17Rik  | 0.000671831 | 2.500057697 | down |
| 9630002P13Rik  | 0.000671835 | 1.65614593  | up   |
| Freq           | 0.000671835 | 2.150788784 | up   |
| Fahd2a         | 0.000673221 | 1.746775508 | down |
| St3gal2        | 0.000675474 | 1.535796166 | down |
| Cdh8           | 0.00067624  | 1.914093852 | up   |
| Tmem50a        | 0.00067624  | 2.049880028 | down |
| Fam110a        | 0.00067722  | 2.028334618 | down |
| Taf6           | 0.00067725  | 1.888170362 | up   |
| Ccl7           | 0.00067729  | 1.70767343  | up   |
| Ckap2          | 0.00067842  | 3.240898371 | down |
| LOC100047827   | 0.000678501 | 2.475079536 | down |
| Cla3           | 0.000678992 | 2.089560032 | down |
| Clcn4-2        | 0.000679773 | 1.675450325 | down |
| 5830417I10Rik  | 0.000679903 | 1.840769291 | up   |
| Dlc1           | 0.000679903 | 4.186814785 | down |
| Ndst2          | 0.000679903 | 1.901230216 | up   |
| BC033915       | 0.000681543 | 2.05995059  | down |
| Gss            | 0.000681543 | 1.652808785 | down |
| Dusp6          | 0.000682623 | 1.744878888 | down |
| Slc40a1        | 0.000682623 | 4.81821394  | up   |
| Rtkn2          | 0.000683112 | 1.535490871 | down |
| 1500015G18Rik  | 0.00068348  | 3.577381373 | down |
| LOC100046843   | 0.00068519  | 1.919487357 | down |
| LOC382096      | 0.000686397 | 2.223068237 | up   |
| Rarres2        | 0.000687092 | 2.231111765 | up   |
| Trp53          | 0.000688149 | 1.753153324 | up   |
| Zfp397         | 0.000688149 | 1.70320797  | down |
| Hs3st2         | 0.000688472 | 2.218337297 | up   |
| 2610528C06Rik  | 0.000690042 | 1.537838817 | down |
| Med24          | 0.000690969 | 1.740402103 | up   |
| Cherp          | 0.000691795 | 1.827370644 | up   |
| Ptpn23         | 0.000694328 | 2.744419813 | up   |
| 1110034O24Rik  | 0.000695082 | 1.801544547 | up   |
| Sharnin        | 0.000696829 | 2.31013298  | up   |
| Mff            | 0.000698425 | 2.018848181 | down |
| Opa1           | 0.000699747 | 1.719260216 | down |
| Gabpa          | 0.000700411 | 1.962973237 | down |
| Ncaph2         | 0.000700597 | 1.600748658 | up   |
| 9626984_125_rc | 0.000701742 | 2.524171829 | up   |
| Adrbk1         | 0.000702044 | 2.29949832  | up   |
| 5830448L21Rik  | 0.000704075 | 1.619936824 | up   |

|               |             |             |      |
|---------------|-------------|-------------|------|
| 8430434A19Rik | 0.000704075 | 1.912283301 | up   |
| LOC242025     | 0.000705257 | 2.713181973 | up   |
| Lgals3        | 0.000705312 | 4.222411156 | up   |
| Stom          | 0.000705312 | 3.041344881 | up   |
| Klhdc10       | 0.00070567  | 2.631810665 | down |
| 9330133O14Rik | 0.000705793 | 2.004089117 | up   |
| Vav1          | 0.000707719 | 3.812849522 | up   |
| B930085B11Rik | 0.00070827  | 1.577212215 | up   |
| Ssr1          | 0.000708679 | 1.73304832  | up   |
| Tnrc6b        | 0.000708679 | 1.602386117 | up   |
| Efcab2        | 0.0007104   | 1.514025807 | down |
| LOC100048153  | 0.000710657 | 1.982411385 | down |
| A930008G19Rik | 0.000711104 | 1.579950929 | up   |
| Itgb8         | 0.000711406 | 1.710262179 | up   |
| Dnajc16       | 0.000713669 | 1.691886663 | up   |
| AW551984      | 0.000715419 | 2.543210268 | down |
| Gfod2         | 0.000715606 | 1.715263486 | up   |
| Polq          | 0.00071707  | 1.578405619 | down |
| 2410129H14Rik | 0.000718316 | 6.096076965 | down |
| B3gnt9        | 0.000718316 | 1.882631064 | up   |
| Gcap3         | 0.000718316 | 1.740790725 | down |
| Terf2         | 0.000718316 | 1.540364385 | up   |
| D930007M16Rik | 0.000718318 | 2.343592644 | up   |
| Wipi2         | 0.000718403 | 1.976464033 | down |
| 2500002A22Rik | 0.000718457 | 2.26513195  | down |
| Camk4         | 0.0007186   | 1.705197811 | up   |
| Srr           | 0.0007186   | 2.932835341 | up   |
| 9830169E20Rik | 0.000719685 | 1.635277271 | up   |
| Srbd1         | 0.000721022 | 1.95819664  | up   |
| C130045F17Rik | 0.000723503 | 2.233765125 | up   |
| Npc2          | 0.000723503 | 1.726733923 | up   |
| LOC100046844  | 0.00072377  | 1.893467903 | down |
| Ints12        | 0.000725179 | 2.545965195 | down |
| A230050N15Rik | 0.00072519  | 1.636012793 | up   |
| Cpt2          | 0.00072519  | 1.654943228 | up   |
| Plce1         | 0.000725831 | 1.828465343 | down |
| 2900036G11Rik | 0.00072611  | 2.836765766 | up   |
| 9530081N05Rik | 0.00072611  | 2.689374924 | down |
| Hs1bp3        | 0.000726428 | 2.154220581 | down |
| Pabpc1        | 0.000726428 | 3.044068575 | down |
| LOC100047583  | 0.000726746 | 3.196999073 | down |
| Ankle2        | 0.000728044 | 2.289969921 | down |
| Tmem104       | 0.000729463 | 1.914024949 | up   |
| E030028L09Rik | 0.000730768 | 1.967088223 | up   |
| Cyhr1         | 0.00073125  | 1.674321652 | down |
| 2310047O13Rik | 0.000731476 | 1.608363509 | down |
| Cdh10         | 0.000731476 | 1.569518328 | down |
| Epdr1         | 0.000732092 | 1.641634941 | down |
| Frag1         | 0.000732222 | 1.891791701 | down |
| Mutyh         | 0.000732222 | 1.77733016  | down |
| Cdh5          | 0.000732399 | 2.503920078 | up   |
| Cyld          | 0.000732979 | 2.369335175 | up   |

|               |             |             |      |
|---------------|-------------|-------------|------|
| 1110049F12Rik | 0.000733457 | 1.650130272 | down |
| 4833441B18Rik | 0.000733457 | 2.662082672 | down |
| LOC100045044  | 0.000733457 | 1.982897759 | up   |
| 3300001G02Rik | 0.000734942 | 1.731248617 | up   |
| Rpap1         | 0.000734942 | 1.729886293 | up   |
| Stoml1        | 0.000734942 | 1.604362011 | down |
| Pomgnt1       | 0.000735941 | 1.608802795 | down |
| Nob1          | 0.000736164 | 1.675647736 | down |
| Tmem205       | 0.000737292 | 1.671764374 | up   |
| Rag1ap1       | 0.000737329 | 1.651530147 | up   |
| Hrsp12        | 0.000738137 | 2.312088728 | down |
| Sympk         | 0.000738137 | 2.12604928  | up   |
| 9430013L17Rik | 0.000739558 | 1.783599615 | up   |
| Hs1bp3        | 0.000739638 | 1.757426143 | down |
| Vps4b         | 0.00073964  | 2.351050854 | up   |
| Eme2          | 0.000739762 | 2.167007446 | up   |
| Zfp182        | 0.000739762 | 1.811989904 | down |
| E230022H04Rik | 0.000740394 | 2.508119106 | up   |
| Msto1         | 0.00074052  | 1.781065583 | down |
| Cpe           | 0.000740596 | 4.363157749 | down |
| Tmem41a       | 0.000740657 | 1.512106419 | down |
| Rhog          | 0.000741394 | 1.563458681 | up   |
| Kif1c         | 0.000741698 | 1.829589963 | up   |
| LOC381105     | 0.000742691 | 1.750582576 | up   |
| Map2k6        | 0.00074276  | 5.535485745 | down |
| Icam1         | 0.000743679 | 2.282441378 | up   |
| Rfwd3         | 0.000743679 | 2.023409605 | down |
| Wdr4          | 0.000743679 | 2.14149785  | down |
| Tead2         | 0.000744074 | 1.736636758 | up   |
| D230009O13Rik | 0.000745698 | 1.582300305 | up   |
| 5730536A07Rik | 0.000746194 | 1.508871079 | up   |
| EG384525      | 0.000746671 | 1.943549156 | up   |
| Slc30a7       | 0.000746709 | 1.592523933 | down |
| LOC672215     | 0.000746715 | 1.943286061 | up   |
| Gtf2i         | 0.000748198 | 3.137578249 | down |
| Heatr3        | 0.000751098 | 1.859936357 | down |
| Tardbp        | 0.000751154 | 2.20495677  | down |
| 9030425E11Rik | 0.000752192 | 1.83179903  | up   |
| Dok2          | 0.000752192 | 2.219880581 | up   |
| EG245190      | 0.000752533 | 2.060107231 | up   |
| Hopx          | 0.000752976 | 2.034017324 | down |
| Spg20         | 0.000752976 | 1.9073416   | down |
| Camk2g        | 0.000754634 | 1.535372615 | up   |
| Ccnd2         | 0.00075501  | 1.814499736 | up   |
| Plxnb1        | 0.00075501  | 1.677596808 | up   |
| Irf2          | 0.000755142 | 1.701186299 | up   |
| Sreb2         | 0.000755142 | 1.772209525 | up   |
| Zeb2          | 0.000755142 | 2.707919359 | up   |
| Zfyve1        | 0.000757591 | 1.554730058 | up   |
| Bivm          | 0.000758249 | 1.525905371 | up   |
| Efnb1         | 0.000761477 | 1.559745431 | down |
| LOC215879     | 0.000761874 | 1.899343014 | up   |



|                 |             |             |      |
|-----------------|-------------|-------------|------|
| Ncor1           | 0.000762308 | 1.541183472 | up   |
| Msi2            | 0.00076231  | 2.370386839 | down |
| A730098H14Rik   | 0.000762381 | 1.671996236 | up   |
| BC002199        | 0.000762381 | 1.78702569  | down |
| Recql5          | 0.000764417 | 1.615813375 | up   |
| EG383436        | 0.0007649   | 1.640600205 | up   |
| Slc6a9          | 0.0007649   | 1.532463551 | up   |
| Mdm1            | 0.00076503  | 1.770058394 | down |
| Pitx1           | 0.00076503  | 2.223091126 | up   |
| Stard3          | 0.000765827 | 1.97995615  | up   |
| Adal            | 0.000766144 | 1.734062195 | down |
| Ddost           | 0.000768321 | 1.645890832 | down |
| Hmgn3           | 0.000768321 | 2.996997595 | down |
| Fh1             | 0.000768748 | 1.836696744 | up   |
| Taz             | 0.000769761 | 1.56415391  | down |
| Ppp2r1a         | 0.000771649 | 1.922006249 | down |
| Klhdc1          | 0.000772018 | 1.991118908 | down |
| Tyms            | 0.000773483 | 2.97887826  | down |
| Inpp1           | 0.00077514  | 1.529582381 | down |
| Dncli2          | 0.000775258 | 1.980805397 | up   |
| S100b           | 0.000775716 | 1.687396884 | down |
| D330006C15Rik   | 0.000776156 | 3.314432383 | down |
| Cic             | 0.00077652  | 1.930728555 | up   |
| Glis2           | 0.00077652  | 1.50624013  | down |
| Nfe2l1          | 0.00077652  | 1.773530483 | up   |
| Hif1an          | 0.000776633 | 2.473073006 | up   |
| Hps5            | 0.000777358 | 1.956764102 | up   |
| Dhrs4           | 0.000778238 | 2.238277435 | down |
| Add1            | 0.000778502 | 2.061981916 | down |
| Dhrs7           | 0.000778877 | 2.326849461 | down |
| Ankrd40         | 0.000779186 | 2.072690725 | up   |
| 1110034A24Rik   | 0.000780336 | 1.730407715 | down |
| Mmp16           | 0.000780799 | 2.130325556 | up   |
| scl0003857.1_11 | 0.000780799 | 1.996368885 | down |
| Ard1a           | 0.000781101 | 2.358183146 | down |
| EG627624        | 0.000782946 | 2.25526166  | down |
| 1700029F09Rik   | 0.000785744 | 2.494041443 | down |
| 2810426N06Rik   | 0.000785875 | 1.513880968 | up   |
| Depdc5          | 0.000786341 | 1.928196073 | up   |
| EG434616        | 0.000786341 | 1.567974448 | down |
| Ogfod1          | 0.000786341 | 1.723189354 | up   |
| Rgs10           | 0.000787815 | 2.4998281   | up   |
| Minpp1          | 0.000787903 | 1.528426886 | down |
| Atrn            | 0.000789049 | 1.515519381 | down |
| Rps6ka1         | 0.000789049 | 1.815821052 | up   |
| Fbxl5           | 0.000789843 | 2.615464926 | down |
| 1200002N14Rik   | 0.000790316 | 1.671218038 | up   |
| BC050254        | 0.000790882 | 1.68426764  | down |
| Mpdz            | 0.000790882 | 1.670507431 | down |
| Zfp364          | 0.000790882 | 1.930966616 | up   |
| Slc25a37        | 0.000792096 | 1.658671856 | up   |
| Pabpc1          | 0.000792471 | 1.69429946  | down |

|               |             |             |      |
|---------------|-------------|-------------|------|
| Whsc111       | 0.000792471 | 2.135353565 | up   |
| Cetn3         | 0.000793806 | 1.552112699 | down |
| Chchd10       | 0.000793806 | 1.82547617  | up   |
| Senp6         | 0.000793806 | 1.505150318 | up   |
| Vezt          | 0.000793806 | 1.973753214 | up   |
| 7530408C15Rik | 0.000794091 | 2.154988527 | up   |
| Chic2         | 0.000794264 | 2.126761437 | down |
| Fbxo9         | 0.000794615 | 1.676539898 | down |
| Tcfap2b       | 0.000796086 | 1.707800388 | down |
| Ifitm3        | 0.000796482 | 2.425762177 | up   |
| Katnb1        | 0.000798825 | 2.002580404 | up   |
| Slc38a5       | 0.000799893 | 2.179512024 | up   |
| Psen1         | 0.000800288 | 2.081907511 | down |
| Tcp1          | 0.000800855 | 1.741256356 | down |
| Muted         | 0.000801829 | 1.613294721 | down |
| Rnf40         | 0.00080243  | 2.316283464 | up   |
| Atl2          | 0.000805787 | 2.101182938 | down |
| Tmem126a      | 0.00080744  | 1.742002964 | down |
| Usp39         | 0.000808532 | 1.534889579 | down |
| H47           | 0.000810973 | 1.856332779 | down |
| Nckap1        | 0.000810973 | 4.134448052 | down |
| C130039E17Rik | 0.000812266 | 2.067170858 | down |
| Diap2         | 0.000812738 | 1.756209016 | up   |
| Zfp335        | 0.000812913 | 2.123939514 | up   |
| Bicd2         | 0.000814141 | 1.517958641 | up   |
| Aldh1a3       | 0.000815524 | 1.922503591 | down |
| Zfp85-rs1     | 0.000818611 | 1.522624373 | down |
| Brp16         | 0.000818751 | 1.706869483 | down |
| LOC215999     | 0.000818751 | 1.535746932 | up   |
| Il17rb        | 0.000820101 | 1.540724754 | down |
| Papola        | 0.00082012  | 2.137450934 | down |
| 1110058L19Rik | 0.000821078 | 1.525534511 | down |
| C2            | 0.000821078 | 2.389507294 | up   |
| Fmr1          | 0.000822589 | 1.931776524 | up   |
| Ube2g2        | 0.000822858 | 1.798889637 | down |
| Pde7b         | 0.000823892 | 2.308328867 | down |
| Ak1           | 0.000824548 | 1.549378395 | up   |
| Rdh14         | 0.000824548 | 3.158828259 | down |
| Tsen15        | 0.000824548 | 2.167198658 | down |
| Mcm3ap        | 0.000825224 | 1.855196714 | up   |
| Crabp1        | 0.000825927 | 2.721472025 | up   |
| Slc12a5       | 0.000827682 | 1.775521398 | up   |
| Sox6          | 0.000827682 | 1.792667627 | down |
| Tmem59        | 0.000827682 | 1.704159975 | down |
| Ugt1a10       | 0.000827996 | 2.830978394 | up   |
| 9430032L10Rik | 0.000828083 | 1.667273998 | up   |
| Pscd1         | 0.000831053 | 1.6057266   | down |
| Tspan17       | 0.000831053 | 1.61040771  | down |
| D6Wsu176e     | 0.000833452 | 2.482609749 | down |
| 9630026C02Rik | 0.000834379 | 1.957079411 | up   |
| Gfpt2         | 0.000835337 | 1.507639051 | down |
| AI452372      | 0.000840292 | 1.674381852 | up   |

|                |             |             |      |
|----------------|-------------|-------------|------|
| LOC100041896   | 0.000844217 | 1.653958678 | down |
| Zkscan5        | 0.000844217 | 1.659579396 | up   |
| Efnb3          | 0.000844946 | 1.549831986 | up   |
| Epn2           | 0.000846182 | 1.793093205 | down |
| Art3           | 0.000847402 | 1.571328759 | down |
| Pld4           | 0.000847402 | 4.97877264  | up   |
| Slc25a3        | 0.000847699 | 1.657124519 | down |
| Nmi            | 0.0008498   | 2.010234594 | up   |
| Pygb           | 0.0008498   | 1.859453082 | up   |
| Rag1           | 0.000850037 | 1.618004084 | up   |
| LOC236371      | 0.000850748 | 2.055670023 | down |
| Myh10          | 0.000850748 | 1.793132901 | down |
| Pik3r3         | 0.000850748 | 2.169127703 | up   |
| scl0002533.1_1 | 0.000850748 | 1.86837697  | down |
| Nog            | 0.000850948 | 4.01401329  | down |
| EG243642       | 0.000852483 | 1.507992506 | down |
| D030022P06Rik  | 0.000854854 | 1.604402542 | up   |
| 9130011E15Rik  | 0.000855373 | 1.630361676 | down |
| Kcnu1          | 0.000855373 | 1.704715967 | up   |
| Rbm28          | 0.000856192 | 1.936598539 | up   |
| Snapin         | 0.000858904 | 2.041892767 | up   |
| Fez2           | 0.000860843 | 1.603789568 | down |
| Mbd6           | 0.000861344 | 1.573334336 | up   |
| LOC100048710   | 0.000863888 | 2.228545904 | up   |
| Ncrna00117     | 0.000863888 | 1.673356652 | down |
| LOC100047199   | 0.000865372 | 1.809193492 | down |
| Slc25a45       | 0.000865653 | 2.548929215 | up   |
| Uhrf2          | 0.000865653 | 2.204324007 | down |
| A930006A19Rik  | 0.000867047 | 2.320179939 | up   |
| Ndufb2         | 0.000872248 | 1.524328113 | up   |
| Zhx1           | 0.000873219 | 1.706879616 | down |
| Six6os1        | 0.000873456 | 1.76849699  | up   |
| Aplnr          | 0.000874723 | 1.825223804 | up   |
| Unc13c         | 0.000877608 | 1.754839301 | up   |
| Phf12          | 0.000878843 | 1.59600687  | up   |
| 8430419L09Rik  | 0.000879268 | 1.509615302 | down |
| LOC621824      | 0.000880059 | 1.693441272 | down |
| Vcl            | 0.000880315 | 1.886447668 | up   |
| LOC386298      | 0.000880532 | 1.645327568 | up   |
| Dctn2          | 0.00088103  | 1.706122041 | down |
| AK122525       | 0.000882149 | 1.713338494 | down |
| BC048355       | 0.000884383 | 2.263658047 | down |
| Cnot3          | 0.000884675 | 1.997102022 | up   |
| LOC100046781   | 0.000884787 | 3.487815142 | up   |
| Cdc14a         | 0.000885033 | 1.981531024 | down |
| LOC100040671   | 0.000885856 | 2.356873512 | up   |
| Tyms           | 0.000885856 | 2.210950136 | down |
| Crabp2         | 0.000886363 | 1.603922963 | up   |
| Trim28         | 0.000886363 | 1.84439528  | up   |
| 2610002M06Rik  | 0.000888345 | 2.476204872 | down |
| Zfp612         | 0.000888345 | 2.382030249 | up   |
| 0610007P08Rik  | 0.000892943 | 1.564627409 | down |

|                 |             |             |      |
|-----------------|-------------|-------------|------|
| B3galnt1        | 0.000893446 | 2.335953236 | down |
| Ptprz1          | 0.000894356 | 1.908211827 | down |
| Ifi30           | 0.000894615 | 1.624698877 | up   |
| 2310036D04Rik   | 0.000897974 | 1.517827272 | up   |
| Crebbp          | 0.000897974 | 1.812695622 | up   |
| Grik1           | 0.00090444  | 1.551676989 | up   |
| LOC100044576    | 0.00090476  | 2.048181295 | up   |
| LOC386164       | 0.000907189 | 2.17485261  | up   |
| Dph5            | 0.000907541 | 1.571827173 | up   |
| scl0002997.1_15 | 0.00090781  | 1.546576738 | down |
| Trerf1          | 0.000909732 | 1.797348023 | up   |
| Rbm15           | 0.000910276 | 2.360110521 | up   |
| Gripap1         | 0.000911517 | 1.921852946 | up   |
| Mbtps1          | 0.000912874 | 1.951483369 | up   |
| Hdac5           | 0.000916087 | 2.052684307 | up   |
| Ckap2l          | 0.000916513 | 2.170403004 | down |
| Crispld2        | 0.000916513 | 2.249298334 | up   |
| Jmjd2a          | 0.000916513 | 2.543379068 | down |
| Ddit4l          | 0.000917263 | 1.81448555  | up   |
| 1810020G14Rik   | 0.000917364 | 2.404939652 | down |
| 6530401I16Rik   | 0.00091805  | 1.822309375 | down |
| Arhgef18        | 0.000918659 | 1.762944222 | up   |
| Hspa9           | 0.000918659 | 1.570945978 | down |
| Kifap3          | 0.000918659 | 1.679756284 | down |
| Ets2            | 0.000920575 | 1.974570274 | down |
| Palm            | 0.000921832 | 2.137369633 | up   |
| EG432721        | 0.000922153 | 1.830411673 | down |
| Ptpre           | 0.000924508 | 1.759332657 | up   |
| A830042C15Rik   | 0.000924703 | 1.60347414  | up   |
| Gbas            | 0.000924703 | 1.902266145 | down |
| Hmga2           | 0.000924703 | 2.021983624 | up   |
| Misc12          | 0.000924703 | 2.155719996 | up   |
| D130066L18Rik   | 0.000928041 | 1.604323268 | up   |
| Kdelr3          | 0.000928076 | 1.755330801 | down |
| Phlda1          | 0.000928076 | 2.164865017 | down |
| LOC386199       | 0.000928797 | 2.699589014 | up   |
| 5730538E15Rik   | 0.000931173 | 1.607057929 | up   |
| Terf2ip         | 0.000931173 | 1.758431196 | down |
| A530092L01Rik   | 0.000931208 | 1.771546483 | up   |
| Psmf1           | 0.000933279 | 1.524743795 | up   |
| 2010309L07Rik   | 0.000935799 | 1.821907044 | up   |
| Cog8            | 0.000935799 | 1.515040636 | up   |
| LOC100046770    | 0.000935799 | 2.553110123 | down |
| Nip7            | 0.000935799 | 4.187808514 | down |
| Pitpnc1         | 0.000935799 | 2.315482378 | down |
| Tnfrsf13b       | 0.000935799 | 1.708664775 | up   |
| Zscan21         | 0.000935799 | 2.050704002 | down |
| Shmt2           | 0.000935829 | 3.164767742 | down |
| C030044C12Rik   | 0.000937239 | 2.230243206 | up   |
| Asph            | 0.000937887 | 1.685213924 | down |
| Ncf4            | 0.000937887 | 2.664585829 | up   |
| Ube2q2          | 0.000937887 | 2.607199192 | down |

|                   |             |             |      |
|-------------------|-------------|-------------|------|
| 4930535116Rik     | 0.000938402 | 1.566395164 | down |
| Msl2l1            | 0.000940063 | 1.755577087 | down |
| Dgcr8             | 0.000940667 | 2.143640995 | up   |
| Xab2              | 0.000940908 | 2.177684069 | up   |
| Edem1             | 0.000942904 | 1.67919004  | down |
| A230075M04Rik     | 0.00094338  | 1.660775423 | down |
| Lilrb4            | 0.00094342  | 1.830344677 | up   |
| Adck5             | 0.000945435 | 1.571097732 | up   |
| Nek8              | 0.000945435 | 1.720896721 | up   |
| LOC546133         | 0.000946278 | 1.652725697 | up   |
| Cmpk              | 0.000946831 | 1.773629785 | up   |
| Spc24             | 0.000946831 | 1.910340905 | down |
| Tmem161a          | 0.000946831 | 1.731407762 | down |
| Ddx47             | 0.000949328 | 2.307098389 | down |
| Rexo2             | 0.000949328 | 2.244694471 | down |
| Cd276             | 0.000949608 | 1.84107089  | up   |
| Arpc1a            | 0.000951765 | 2.271959782 | down |
| Gtdc1             | 0.000951861 | 2.286889792 | down |
| Clcn3             | 0.000953132 | 1.64994669  | up   |
| Mrps33            | 0.000953132 | 1.913109779 | down |
| Ccne1             | 0.000955471 | 1.816719413 | down |
| Snx1              | 0.000955471 | 1.925142765 | up   |
| D030028A08Rik     | 0.000956366 | 1.591829777 | up   |
| Zfp125            | 0.000956482 | 1.774166942 | up   |
| LOC668183         | 0.000963151 | 2.390392065 | down |
| Prdx2             | 0.000963151 | 2.261679411 | up   |
| Tmem100           | 0.00096354  | 1.629628658 | down |
| D630024O03Rik     | 0.000965172 | 5.263995171 | up   |
| Arl10c            | 0.000965403 | 1.75693357  | up   |
| Myo1g             | 0.000965757 | 2.697003603 | up   |
| LOC383850         | 0.000966677 | 1.89019084  | up   |
| LOC269515         | 0.000967978 | 1.556047678 | down |
| Whsc2             | 0.000968416 | 1.659742832 | up   |
| LOC100046008      | 0.00096893  | 1.54093504  | up   |
| Pmm2              | 0.00096893  | 2.219312668 | down |
| 6030438J01        | 0.00096953  | 2.103323221 | up   |
| Cldn10            | 0.00096953  | 1.68889761  | down |
| Ifitm1            | 0.000969837 | 2.014776468 | up   |
| Zmym6             | 0.000973584 | 2.57755208  | up   |
| Dok4              | 0.000974923 | 2.058350802 | up   |
| D2Ertd391e        | 0.000975583 | 2.232372046 | up   |
| Zfp61             | 0.000976345 | 1.989290118 | up   |
| Npm3-ps1          | 0.000976988 | 2.108114243 | down |
| Acta2             | 0.000979501 | 2.506484985 | down |
| Fam181b           | 0.000979501 | 1.706959963 | down |
| Gpx7              | 0.000979501 | 2.005330801 | down |
| scl0003476.1_2802 | 0.000982393 | 2.157479048 | up   |
| Slc39a9           | 0.000982393 | 1.837125421 | up   |
| Oxct1             | 0.000983893 | 2.150996447 | down |
| Nsmce2            | 0.000984079 | 4.732778072 | down |
| Plekhf1           | 0.000984974 | 1.727775216 | down |
| Dbt               | 0.000987097 | 1.782038689 | down |

|                |             |             |      |
|----------------|-------------|-------------|------|
| Rad51c         | 0.000988342 | 2.507941961 | down |
| Acad10         | 0.000988702 | 1.618595839 | up   |
| Rwdd4a         | 0.00099017  | 1.693397045 | up   |
| Yeats2         | 0.000994034 | 1.560504913 | up   |
| Lphn1          | 0.000994251 | 3.276886225 | up   |
| 2310022B05Rik  | 0.000994383 | 1.517957449 | up   |
| W91709         | 0.000994383 | 2.12598443  | up   |
| Mettl4         | 0.00099516  | 1.525905252 | down |
| Hist1h4d       | 0.000995451 | 1.672791123 | down |
| Crtc3          | 0.0009964   | 2.221070528 | up   |
| Otud7b         | 0.000997051 | 2.473006249 | up   |
| Stx6           | 0.000998389 | 1.746162176 | down |
| Rit2           | 0.000998491 | 2.271516562 | up   |
| 2210038L17Rik  | 0.000999456 | 1.976977468 | up   |
| 1600021P15Rik  | 0.001000329 | 2.081422806 | down |
| Dctn1          | 0.001004407 | 2.952730417 | up   |
| Xpo7           | 0.001004546 | 1.902608395 | down |
| Bbs9           | 0.001004716 | 1.631353974 | down |
| Camk1d         | 0.001004889 | 1.549100399 | up   |
| Mcart6         | 0.001007106 | 1.954837203 | down |
| Arl6ip5        | 0.001007404 | 1.767628431 | down |
| LOC382691      | 0.001007404 | 2.771187067 | down |
| Tsc22d3        | 0.001010016 | 1.754339337 | down |
| Ing4           | 0.001013749 | 1.919811487 | up   |
| 2010311D03Rik  | 0.001014041 | 2.806665421 | down |
| Arl11          | 0.001015426 | 2.136006832 | up   |
| Zfand2b        | 0.00101671  | 1.578392267 | down |
| Relb           | 0.00101733  | 1.525190473 | up   |
| scl0002493.1_0 | 0.001017962 | 1.553257108 | down |
| E130301L11Rik  | 0.00101824  | 2.675470829 | up   |
| scl000707.1_0  | 0.00101964  | 2.520102978 | up   |
| Gins4          | 0.001020148 | 1.642088294 | up   |
| Hira           | 0.00102057  | 1.93010962  | down |
| Adamts9        | 0.001022134 | 1.56271708  | up   |
| F3             | 0.001022134 | 1.758131027 | down |
| Prkd1          | 0.001024089 | 1.653883219 | down |
| Nudt3          | 0.001024555 | 2.070083618 | up   |
| C430045L21Rik  | 0.001025426 | 1.914214134 | up   |
| Cks2           | 0.001026336 | 1.945866227 | up   |
| 2700063G02Rik  | 0.001027303 | 1.717841029 | up   |
| Nfat5          | 0.001027303 | 1.673508048 | up   |
| Slc3a2         | 0.001027303 | 2.600226402 | up   |
| Naprt1         | 0.001027489 | 1.555171847 | down |
| Parp9          | 0.001028591 | 1.737879396 | up   |
| Siah2          | 0.001028778 | 1.570129395 | down |
| Reck           | 0.00103131  | 1.91040349  | down |
| Zfp317         | 0.001031421 | 1.669347167 | down |
| Hnrnpul1       | 0.001031442 | 1.750171661 | down |
| LOC622901      | 0.001031671 | 1.571720839 | up   |
| 5830427D03Rik  | 0.001035344 | 2.215423584 | up   |
| CKLF5          | 0.001035684 | 1.560355544 | up   |
| Trap1          | 0.001036756 | 1.591694832 | up   |

|                |             |             |      |
|----------------|-------------|-------------|------|
| Wdr37          | 0.001037843 | 1.907283664 | down |
| 4930513N10Rik  | 0.001038607 | 1.533799529 | up   |
| Hmbs           | 0.001039323 | 2.112030506 | up   |
| Rtn4ip1        | 0.00104094  | 1.805151105 | up   |
| Flrt1          | 0.00104106  | 1.882780433 | up   |
| Abcd4          | 0.001041508 | 1.616673231 | up   |
| Drg1           | 0.001041508 | 2.441031933 | down |
| Fam168a        | 0.001041508 | 1.668094993 | up   |
| Upf1           | 0.001041508 | 1.780835986 | up   |
| Myo9a          | 0.001043189 | 2.053853989 | up   |
| Gm106          | 0.001044875 | 2.287182808 | down |
| 1110018J18Rik  | 0.001045462 | 2.008842945 | down |
| Mfsd3          | 0.001045462 | 1.808592677 | up   |
| EG626841       | 0.001046873 | 1.532622218 | down |
| Cnot7          | 0.001048682 | 1.924594402 | down |
| Cd68           | 0.001050191 | 5.700698376 | up   |
| Fut10          | 0.001051545 | 1.734608173 | up   |
| Rpl21          | 0.001051545 | 1.564572334 | down |
| Them2          | 0.001053505 | 1.627916813 | up   |
| LOC100038887   | 0.001054136 | 2.23310113  | down |
| Cotl1          | 0.001056145 | 2.605662823 | up   |
| Nanos1         | 0.001056145 | 1.562861919 | down |
| Wrn            | 0.001056145 | 1.957185507 | up   |
| Gtl2           | 0.001056454 | 1.683142543 | up   |
| D4Wsu132e      | 0.001058019 | 1.664388657 | down |
| Lcmt1          | 0.001058587 | 2.248296022 | down |
| Tnnt2          | 0.001059862 | 1.675191402 | up   |
| E430003D02Rik  | 0.001060545 | 1.925400138 | down |
| Exosc10        | 0.001062018 | 1.675004721 | up   |
| Mylip          | 0.00106363  | 1.537615657 | up   |
| LOC100048530   | 0.001064473 | 2.146600485 | up   |
| BC065120       | 0.0010652   | 1.674632192 | down |
| Rab2b          | 0.001065661 | 1.590023994 | up   |
| Timm44         | 0.001065946 | 1.536224008 | up   |
| Bahcc1         | 0.001066029 | 1.527143121 | down |
| P2ry13         | 0.001066967 | 2.462240934 | up   |
| Nacc1          | 0.001067763 | 1.889197469 | up   |
| Hist1h2bf      | 0.001070402 | 1.827791691 | down |
| Adck4          | 0.001073073 | 2.188557625 | up   |
| 9626962_1_rc   | 0.001073401 | 3.024059534 | up   |
| Rpl23          | 0.001073897 | 1.558342934 | up   |
| Mier3          | 0.001074366 | 2.594699621 | down |
| A930019J01Rik  | 0.001074904 | 2.279903412 | down |
| Mrpl15         | 0.001074904 | 2.821289778 | down |
| Usp5           | 0.001076855 | 1.543330193 | up   |
| Snx33          | 0.001080176 | 1.719529152 | up   |
| scl0002275.1_1 | 0.001081781 | 2.36147666  | down |
| Tmem101        | 0.001082365 | 2.014776707 | up   |
| Eif3k          | 0.001082547 | 1.668414354 | up   |
| Insig2         | 0.001082784 | 2.227345228 | down |
| Postn          | 0.001082874 | 4.589205265 | down |
| LOC383153      | 0.001083232 | 1.526769042 | down |

|                  |             |             |      |
|------------------|-------------|-------------|------|
| Dgcr2            | 0.001083652 | 1.656951189 | down |
| D630030B22Rik    | 0.001084831 | 1.500329733 | up   |
| Tor1b            | 0.001085869 | 1.668402076 | up   |
| Dedd             | 0.001087353 | 1.941467285 | down |
| Etfa             | 0.001088822 | 2.289352417 | down |
| Wbp2             | 0.001088822 | 1.767673254 | down |
| Ctnbp2nl         | 0.001089024 | 1.536500096 | down |
| Aarsd1           | 0.001089184 | 1.993360043 | up   |
| B930097J01Rik    | 0.001089184 | 2.073749781 | up   |
| EG546052         | 0.001089184 | 1.985993862 | down |
| LOC666053        | 0.001089184 | 2.020558834 | down |
| Ttc28            | 0.001089596 | 2.133371592 | up   |
| Mmp11            | 0.001090527 | 2.097203016 | up   |
| LOC674195        | 0.001090818 | 1.927259088 | up   |
| Adamts10         | 0.001093751 | 2.813961983 | up   |
| Osr2             | 0.00109451  | 1.955943227 | down |
| Arpc1b           | 0.001095492 | 1.532239556 | up   |
| Cep27            | 0.001096554 | 1.760466456 | down |
| E330016A19Rik    | 0.001098942 | 1.755437613 | up   |
| Ppard            | 0.001098942 | 1.571586847 | down |
| 5830454D03Rik    | 0.001099095 | 1.808461785 | up   |
| E130118E17Rik    | 0.001103729 | 2.198096275 | up   |
| Tle3             | 0.001104039 | 1.855359912 | up   |
| Pacrgl           | 0.001104756 | 2.000694037 | down |
| 2610039C10Rik    | 0.001105036 | 3.718868494 | down |
| Eif4e            | 0.001106951 | 1.603933334 | up   |
| Rbmxrt           | 0.001108419 | 2.461699724 | up   |
| Pias3            | 0.001110806 | 2.097896099 | up   |
| Herc1            | 0.001112086 | 1.521829844 | up   |
| Tmub2            | 0.001112086 | 1.873716712 | up   |
| 2810410M20Rik    | 0.001113105 | 1.58388257  | down |
| Wwp2             | 0.001114356 | 1.589534521 | down |
| Grb10            | 0.001116259 | 2.013310194 | up   |
| Ryr1             | 0.001117471 | 1.881572962 | up   |
| Ragef6           | 0.001119049 | 1.578709483 | down |
| Sec16a           | 0.001119572 | 1.556519032 | up   |
| A730094H17Rik    | 0.001119986 | 1.957684398 | up   |
| C130090G16Rik    | 0.001119986 | 1.693909764 | up   |
| Zmpste24         | 0.001119986 | 2.255541563 | down |
| Igf1             | 0.001120033 | 1.768460631 | up   |
| Mpnd             | 0.001120451 | 1.708215952 | up   |
| scl000568.1_1444 | 0.001121015 | 1.57271421  | up   |
| Supt16h          | 0.001121015 | 1.628678083 | up   |
| LOC100046298     | 0.001122942 | 2.111520052 | down |
| Rab8a            | 0.001122942 | 1.560746551 | up   |
| LOC100048079     | 0.001122957 | 1.628016472 | down |
| LOC100039461     | 0.001123953 | 1.772439003 | up   |
| D930014E17Rik    | 0.001125041 | 1.504359603 | up   |
| Actr1b           | 0.00112538  | 1.696915984 | up   |
| Arfip2           | 0.001126039 | 2.38974452  | down |
| Stau2            | 0.001127039 | 1.965145826 | down |
| 2610507B11Rik    | 0.001127766 | 1.654443502 | up   |



|               |             |             |      |
|---------------|-------------|-------------|------|
| Add1          | 0.001127766 | 2.574988604 | down |
| Tmepai        | 0.001127766 | 1.643532395 | down |
| 9530018D06Rik | 0.001129034 | 3.243758917 | up   |
| Casp9         | 0.001129449 | 1.65629518  | up   |
| Cdc6          | 0.001129449 | 1.688206434 | down |
| Ctr9          | 0.001129449 | 2.080210924 | up   |
| Krt18         | 0.001129449 | 1.601678252 | up   |
| Lpgat1        | 0.001129449 | 1.891710401 | up   |
| Trmt2b        | 0.001129449 | 1.662264347 | down |
| Tubgcp5       | 0.001129449 | 1.500069141 | up   |
| LOC664892     | 0.001130711 | 1.676155567 | up   |
| Arl3          | 0.001134069 | 2.866230488 | down |
| Cyp39a1       | 0.001134069 | 2.22275424  | down |
| Slc35a3       | 0.001134286 | 1.659265637 | down |
| Ippk          | 0.00113465  | 1.510338426 | down |
| C920011G20Rik | 0.001135894 | 1.925225973 | up   |
| Uap1l1        | 0.001138886 | 2.030499697 | up   |
| Ptpn6         | 0.001140405 | 3.077181816 | up   |
| 6720463M24Rik | 0.001142289 | 1.882989645 | down |
| Ogdh          | 0.001142302 | 2.207346439 | up   |
| Ehd4          | 0.001142902 | 2.178522587 | up   |
| Kdelr3        | 0.001149642 | 2.137759924 | down |
| Hoxc10        | 0.001150567 | 1.764403105 | up   |
| Oraov1        | 0.001150842 | 2.207996607 | up   |
| Ptprm         | 0.001150842 | 1.623142839 | down |
| A130010C12Rik | 0.001151636 | 2.763610363 | up   |
| 1810046K07Rik | 0.001151771 | 2.342598677 | down |
| C1qtnf6       | 0.001151771 | 1.661123037 | up   |
| Smarcc1       | 0.001154293 | 2.587359428 | down |
| 9845300_4289  | 0.001156944 | 2.811022043 | down |
| Dock5         | 0.001156944 | 1.916880131 | up   |
| Luzp2         | 0.001159602 | 1.675012708 | down |
| Etfdh         | 0.001160579 | 1.693230391 | down |
| Gp5           | 0.00116249  | 2.846934319 | up   |
| A630036P20Rik | 0.001163716 | 2.148339748 | up   |
| Zfp101        | 0.001167731 | 1.873557925 | down |
| Al851790      | 0.001168923 | 2.56488204  | down |
| Rnf20         | 0.001169237 | 1.661683679 | up   |
| BC059842      | 0.00117052  | 1.788316131 | up   |
| Ndufa13       | 0.00117052  | 1.551068187 | up   |
| LOC100044190  | 0.001170721 | 1.664128423 | up   |
| Itfg3         | 0.001171949 | 1.844382405 | down |
| B230104P22Rik | 0.001173838 | 1.806749582 | up   |
| Rhou          | 0.001174149 | 2.100575924 | up   |
| Adnp          | 0.001178889 | 5.289130688 | down |
| Ms4a6b        | 0.001182045 | 2.225795984 | up   |
| Rnf4          | 0.001184763 | 2.401705504 | down |
| Stk39         | 0.001185332 | 1.816866875 | down |
| Bbs5          | 0.001185681 | 1.786554575 | down |
| Bxdc2         | 0.001186701 | 2.773817301 | down |
| 8030448K23Rik | 0.001187263 | 1.519899726 | up   |
| Dhx58         | 0.001187317 | 1.745324373 | up   |

|                 |             |             |      |
|-----------------|-------------|-------------|------|
| EG216185        | 0.001190561 | 1.577683449 | down |
| Eno2            | 0.00119091  | 2.091520786 | up   |
| C330046E03      | 0.001192985 | 2.761460543 | up   |
| Idi1            | 0.001192985 | 1.85785687  | up   |
| Mest            | 0.001193412 | 1.687818408 | down |
| Ppt2            | 0.001194181 | 1.515129924 | down |
| Ccl9            | 0.001197292 | 6.151591778 | up   |
| scl0003949.1_31 | 0.001197571 | 2.054114342 | down |
| Calca           | 0.001198601 | 1.879122376 | down |
| Hipk2           | 0.001198601 | 2.047196627 | up   |
| Hist1h3f        | 0.001201033 | 1.840523362 | down |
| Ccdc5           | 0.001202335 | 1.62722683  | up   |
| Zfp212          | 0.001205064 | 1.646409631 | down |
| Trf             | 0.001205189 | 2.72731328  | up   |
| Acpl2           | 0.001208577 | 2.482869387 | down |
| 0610010I05Rik   | 0.001208631 | 3.44824934  | down |
| 1110001C23Rik   | 0.001208801 | 1.932467699 | up   |
| Hlcs            | 0.001209013 | 1.634361148 | up   |
| 5031439G07Rik   | 0.001210541 | 1.632893682 | up   |
| 9430047G12Rik   | 0.001210779 | 3.430176973 | up   |
| D230045O07Rik   | 0.001211126 | 2.506356001 | up   |
| Ddx50           | 0.001211126 | 3.383285999 | down |
| LOC100047856    | 0.001211151 | 1.56641233  | down |
| D330037A04Rik   | 0.001214775 | 1.881937504 | up   |
| Mdm1            | 0.001215128 | 1.97629261  | down |
| 2310003L22Rik   | 0.00121827  | 1.681576014 | up   |
| Ankrd6          | 0.001220926 | 1.580711484 | down |
| 2810474O19Rik   | 0.001222105 | 2.274237633 | up   |
| E430012K20Rik   | 0.001225638 | 1.590662479 | down |
| Abca9           | 0.001226893 | 1.846090078 | up   |
| Cask            | 0.001228946 | 1.625333309 | up   |
| Smpd4           | 0.001229867 | 1.671432376 | down |
| Mtrr            | 0.001231021 | 1.812602162 | down |
| Phb2            | 0.001237359 | 1.5124048   | up   |
| Agfg1           | 0.00123762  | 1.679559112 | down |
| 2310010J17Rik   | 0.001238259 | 1.538585901 | up   |
| Fv1             | 0.001238294 | 1.607164264 | down |
| Ccl24           | 0.001239796 | 3.242741585 | up   |
| Arid3a          | 0.001240479 | 2.460443974 | up   |
| Dst             | 0.001240479 | 1.81259644  | up   |
| Polr2d          | 0.001240479 | 2.717124939 | down |
| AU019823        | 0.001243073 | 1.733773112 | down |
| Amy2-2          | 0.001245599 | 1.824177146 | up   |
| LOC386117       | 0.001245599 | 1.71206975  | up   |
| Prim2           | 0.001245599 | 1.800039053 | down |
| Parp3           | 0.001249813 | 1.874984503 | up   |
| Dtx2            | 0.001249833 | 2.078676939 | down |
| Sap130          | 0.001253148 | 1.744393587 | up   |
| Tfdp2           | 0.001253148 | 1.684639573 | down |
| 1600016N20Rik   | 0.001255958 | 1.926030755 | up   |
| scl0004020.1_31 | 0.001256218 | 2.505968809 | down |
| Atp13a1         | 0.001256327 | 2.145743609 | up   |

|                |             |             |      |
|----------------|-------------|-------------|------|
| Exoc8          | 0.001260483 | 1.648089409 | up   |
| scl0003749.1_1 | 0.001260986 | 1.539248109 | down |
| Abcd1          | 0.001261477 | 1.810402155 | up   |
| Hmgb2l1        | 0.001262462 | 1.711944699 | down |
| Impact         | 0.001262462 | 1.725575924 | down |
| Taf6           | 0.001262462 | 1.526983738 | up   |
| Hcls1          | 0.001266285 | 2.485381603 | up   |
| Lpp            | 0.001267126 | 2.138572931 | up   |
| Hist2h2be      | 0.001268526 | 1.951281548 | down |
| D030019N20Rik  | 0.00127181  | 2.69084692  | up   |
| Zfpm2          | 0.001274669 | 1.900486469 | down |
| LOC270589      | 0.001276972 | 2.150870085 | up   |
| Tlk1           | 0.001276972 | 1.675049186 | up   |
| 2810403A07Rik  | 0.001279505 | 1.580392003 | up   |
| 9630009A08Rik  | 0.001279794 | 2.443462372 | up   |
| Hras1          | 0.001280754 | 1.683243513 | up   |
| C130020C07Rik  | 0.001282111 | 1.997501731 | up   |
| P4ha3          | 0.001282111 | 1.80704093  | down |
| LOC631301      | 0.001284509 | 2.857666254 | down |
| Tcf20          | 0.00128461  | 1.644688368 | down |
| 2700078K13Rik  | 0.001288092 | 2.503597975 | up   |
| Fts            | 0.001288092 | 2.210709572 | up   |
| Pnrc2          | 0.001288215 | 2.147199392 | down |
| B3gntl1        | 0.001292241 | 1.502738714 | up   |
| Dnmt3a         | 0.001292241 | 1.655543208 | up   |
| 0610007J10Rik  | 0.001295532 | 2.341670752 | down |
| A930038D23Rik  | 0.001295744 | 1.629433036 | up   |
| Micall2        | 0.001295744 | 1.728844047 | up   |
| Spon2          | 0.001295895 | 2.381313324 | up   |
| Gstp1          | 0.001296265 | 1.726598024 | down |
| Ccdc15         | 0.00129693  | 1.529206395 | up   |
| Gnai3          | 0.001297163 | 1.576985478 | up   |
| 1810074P20Rik  | 0.001300037 | 1.614268303 | down |
| Mbp            | 0.001300037 | 1.633033872 | down |
| 6720417O19Rik  | 0.001302543 | 1.72094667  | up   |
| Ggnbp2         | 0.00130291  | 1.699626327 | up   |
| A230065H16Rik  | 0.001304143 | 1.683574081 | down |
| Cd93           | 0.001304143 | 2.563290358 | up   |
| Stx12          | 0.001304143 | 1.661991477 | up   |
| Prdm6          | 0.001309101 | 2.116293669 | down |
| Trim30         | 0.001309101 | 2.020578384 | up   |
| scl0001118.1_0 | 0.001311197 | 1.874174118 | down |
| Riok3          | 0.001313401 | 2.018571138 | down |
| Sfrs11         | 0.001313607 | 2.210344076 | down |
| Pik3r1         | 0.001316492 | 2.600860834 | down |
| 2510002J07Rik  | 0.001316965 | 1.505857825 | up   |
| LOC270017      | 0.001317781 | 3.687342405 | up   |
| Gltscr2        | 0.001317811 | 1.810175538 | up   |
| Psmb8          | 0.001318577 | 1.528303981 | up   |
| 2610202A04Rik  | 0.001318712 | 1.565314293 | up   |
| Gpc2           | 0.001318712 | 2.041071177 | up   |
| Plxnd1         | 0.001319153 | 2.83500123  | up   |

|               |             |             |      |
|---------------|-------------|-------------|------|
| Abcc10        | 0.001319443 | 1.871612191 | up   |
| Psmc6         | 0.001319443 | 2.030457735 | up   |
| BC004728      | 0.001321819 | 3.255896807 | up   |
| Sgk1          | 0.001322732 | 1.599029541 | down |
| 4933407C03Rik | 0.001322784 | 2.094254255 | up   |
| A630072J24Rik | 0.001322986 | 2.36232543  | up   |
| AI894139      | 0.001325015 | 1.693979979 | up   |
| Rnf181        | 0.001326282 | 1.852025271 | down |
| D630035D13Rik | 0.001332618 | 1.799160481 | up   |
| LOC100044133  | 0.001333982 | 1.77037251  | down |
| 6330575P09Rik | 0.00133553  | 1.683894873 | up   |
| Alx1          | 0.00133553  | 2.564602852 | down |
| Eng           | 0.00133553  | 2.155508757 | up   |
| Ephb4         | 0.00133553  | 1.960762024 | up   |
| B230312E02Rik | 0.001336744 | 1.554623842 | up   |
| Psme2         | 0.001338594 | 2.058163166 | down |
| 8430438I05Rik | 0.001338704 | 1.692926049 | up   |
| Flii          | 0.001338732 | 2.172633886 | up   |
| Ift74         | 0.001339297 | 1.976718903 | down |
| Thrap3        | 0.001345004 | 1.904495597 | up   |
| Cdc14b        | 0.001345496 | 1.703128696 | down |
| Ehd4          | 0.001345496 | 2.332180738 | up   |
| Hoxc9         | 0.001346065 | 2.073279381 | up   |
| Hba-a1        | 0.001350424 | 13.63499546 | up   |
| Gsto1         | 0.001353281 | 1.542165399 | down |
| Ndufb4        | 0.001353281 | 2.297720194 | up   |
| LOC386288     | 0.001358223 | 3.126948357 | up   |
| Slc11a1       | 0.00135934  | 2.419321537 | up   |
| Emg1          | 0.00136085  | 1.713222742 | down |
| Rsdrl-pending | 0.001363005 | 1.535302758 | down |
| LOC635253     | 0.001363536 | 1.58672297  | down |
| Myc           | 0.001363536 | 1.514363527 | down |
| Prkrip1       | 0.001364302 | 1.878593087 | down |
| Dgcr14        | 0.001364609 | 1.746639967 | up   |
| Syncrip       | 0.001365058 | 1.773158789 | down |
| LOC100047007  | 0.001365279 | 1.627414823 | up   |
| Smarcc2       | 0.001366583 | 3.076368332 | up   |
| Uhrf1         | 0.001366686 | 1.690306664 | down |
| Pcdhb16       | 0.001367903 | 1.891284585 | up   |
| Ptges2        | 0.001368286 | 1.518815756 | up   |
| Slc12a9       | 0.001368352 | 1.710175157 | up   |
| Yipf6         | 0.001372094 | 1.743624806 | down |
| D930030O05Rik | 0.001373269 | 3.18283844  | up   |
| 4930455F23Rik | 0.001373571 | 1.867770433 | up   |
| Dab1          | 0.001373571 | 1.782429457 | down |
| Madh1         | 0.001373571 | 1.813425064 | up   |
| Map3k3        | 0.001373571 | 2.210063934 | up   |
| 9330171B01Rik | 0.001373682 | 2.062614203 | up   |
| 2900062L11Rik | 0.001376657 | 1.796715021 | down |
| Cdkn2d        | 0.001376657 | 1.792257905 | down |
| Slc7a7        | 0.001377132 | 1.755987525 | up   |
| Cfb           | 0.001382249 | 1.619415164 | up   |

|               |             |             |      |
|---------------|-------------|-------------|------|
| Igf2as        | 0.001382283 | 1.710151911 | up   |
| Atpbd3        | 0.001384235 | 1.517065406 | down |
| Hdhd2         | 0.001384235 | 2.030791283 | down |
| Pcbp3         | 0.001384798 | 1.630687714 | up   |
| Fscn1         | 0.001384939 | 2.383372784 | up   |
| Cep350        | 0.001386702 | 1.842551589 | up   |
| A330017A19Rik | 0.001390259 | 1.877308846 | up   |
| Wwc2          | 0.001390259 | 1.583288193 | up   |
| D030016E14Rik | 0.001390404 | 1.644117117 | down |
| Xylb          | 0.001393348 | 1.574090004 | up   |
| Fig4          | 0.001394433 | 2.071825981 | up   |
| LOC100047369  | 0.00139817  | 1.643435121 | up   |
| Mgst1         | 0.00139817  | 2.017282248 | down |
| Gria3         | 0.001398645 | 1.739444256 | up   |
| 1810015C11Rik | 0.001400115 | 2.128852367 | up   |
| Gucy1a3       | 0.001400137 | 2.281820059 | up   |
| 2010204K13Rik | 0.001400432 | 2.177839518 | down |
| Btk           | 0.001400432 | 2.97397089  | up   |
| Lsr           | 0.001400432 | 1.549177051 | down |
| Pstpip2       | 0.001400432 | 1.54054749  | down |
| Rchy1         | 0.001400432 | 1.662866712 | down |
| Srp9          | 0.001400432 | 2.077630997 | down |
| Spty2d1       | 0.001401624 | 1.679500341 | down |
| Nrg1          | 0.001402922 | 1.833201647 | up   |
| Fus           | 0.001404416 | 3.304260731 | down |
| Nat11         | 0.00140502  | 1.606286287 | down |
| A930013F10Rik | 0.001405513 | 2.469285727 | up   |
| Actb          | 0.001405513 | 2.797592163 | up   |
| Col4a2        | 0.001405513 | 1.671015263 | up   |
| Trio          | 0.001406998 | 1.626712561 | down |
| Bcl11b        | 0.001408223 | 1.845429659 | down |
| 2310033P09Rik | 0.001409224 | 1.560455442 | up   |
| Cpa3          | 0.001410989 | 3.052464247 | up   |
| LOC380756     | 0.001410989 | 1.993102431 | down |
| Smox          | 0.001411792 | 1.739189863 | down |
| Thsd1         | 0.001411792 | 1.6396209   | up   |
| Hs3st3b1      | 0.001414025 | 1.865917325 | down |
| Fip1l1        | 0.001418474 | 1.568021417 | down |
| Nme4          | 0.001419213 | 1.616770983 | down |
| Med18         | 0.001424609 | 1.59346962  | up   |
| Nedd4l        | 0.00142604  | 1.516248822 | down |
| E430024E16Rik | 0.001428528 | 1.655447125 | up   |
| Rhpn1         | 0.001433004 | 2.106686354 | down |
| 4933400F03Rik | 0.001436777 | 1.712092638 | up   |
| Uck2          | 0.001437029 | 1.915061951 | down |
| Vdac2         | 0.001437398 | 1.665377498 | up   |
| Dock2         | 0.001439338 | 1.638944745 | up   |
| Fundc1        | 0.0014394   | 1.708661199 | down |
| Abhd1         | 0.001441544 | 1.55307734  | up   |
| Ptprb         | 0.001441753 | 2.290420294 | up   |
| Stard10       | 0.001442281 | 1.654127836 | down |
| Stxbp4        | 0.001442281 | 1.900921226 | down |

|               |             |             |      |
|---------------|-------------|-------------|------|
| Ankrd27       | 0.001443499 | 1.930335403 | down |
| Vwa2          | 0.001444164 | 1.516442657 | down |
| Tln2          | 0.001444437 | 1.781723261 | up   |
| Polr2d        | 0.001446054 | 2.792487383 | down |
| Fbxo25        | 0.001446564 | 1.952106476 | up   |
| Sncg          | 0.001448643 | 1.57569468  | down |
| Adpgk         | 0.001452042 | 1.868386626 | up   |
| 1110029I05Rik | 0.001452192 | 1.935266972 | up   |
| LOC385046     | 0.001453555 | 1.635743022 | down |
| 1200003I07Rik | 0.001456614 | 2.027455807 | up   |
| 1600010O03Rik | 0.001456614 | 1.922224522 | up   |
| Scnm1         | 0.001456614 | 1.573735237 | up   |
| Col12a1       | 0.001459592 | 1.992657542 | down |
| Hoxd9         | 0.001459709 | 1.69859314  | up   |
| Creld2        | 0.001460808 | 2.021269321 | down |
| Ankrd26       | 0.001461533 | 1.563565016 | down |
| Mpv17l        | 0.00146227  | 1.529810667 | up   |
| Rps3          | 0.001463545 | 1.836743236 | down |
| Usp12         | 0.001468573 | 1.608047366 | down |
| Fbp2          | 0.001468936 | 2.343615055 | down |
| Asb2          | 0.00147255  | 2.209375143 | up   |
| Uqcrh         | 0.00147255  | 1.941877365 | down |
| E130301F21Rik | 0.00147392  | 2.725469589 | down |
| Hint3         | 0.001475331 | 1.692176342 | down |
| Sash1         | 0.001479993 | 2.057686567 | up   |
| Dio2          | 0.00148066  | 2.13854003  | up   |
| Ddt           | 0.00148402  | 1.562228441 | up   |
| LOC624662     | 0.001485834 | 1.810651779 | down |
| A730095J18Rik | 0.001487465 | 1.938135266 | up   |
| Tsc1          | 0.001489082 | 2.129157066 | up   |
| 4732431J01Rik | 0.001490197 | 1.749461055 | up   |
| Dlgap4        | 0.001490197 | 1.550408244 | up   |
| LOC671399     | 0.001490197 | 1.963004947 | down |
| Ugt1a10       | 0.001490585 | 3.018768311 | up   |
| 2010009J12Rik | 0.001491783 | 1.550962091 | up   |
| Epc1          | 0.001492383 | 2.106541634 | down |
| 3110038B19Rik | 0.001495229 | 1.657213926 | down |
| lpas          | 0.001495229 | 1.907285929 | up   |
| 2310065K24Rik | 0.001496167 | 1.668307185 | up   |
| Tmem189       | 0.001496167 | 1.80518496  | down |
| Wbp7          | 0.001496209 | 2.01599741  | up   |
| Luzp1         | 0.001497659 | 2.358450651 | up   |
| 2810017I02Rik | 0.001497711 | 1.861921787 | down |
| H2afx         | 0.001497711 | 1.630644798 | up   |
| 0610010F05Rik | 0.001499229 | 2.255190849 | down |
| Aph1b         | 0.001500445 | 1.798661828 | down |
| Col4a5        | 0.001502058 | 2.163853407 | down |
| Ndufa1        | 0.001502058 | 1.57775116  | down |
| B230353O14Rik | 0.001507869 | 1.509917855 | up   |
| H2-T10        | 0.001509044 | 2.040434122 | down |
| Azi2          | 0.001511271 | 1.792396307 | down |
| Ahrr          | 0.001512735 | 1.562556505 | up   |

|                |             |             |      |
|----------------|-------------|-------------|------|
| Gmgs           | 0.001513188 | 1.810869336 | down |
| Atp8a1         | 0.001513474 | 1.579180002 | up   |
| LOC382776      | 0.001513474 | 1.595616579 | up   |
| LOC638031      | 0.001514276 | 1.805624962 | up   |
| Slc7a8         | 0.001515493 | 1.810862303 | up   |
| Tgfbr1         | 0.001516419 | 1.533280373 | down |
| Picalm         | 0.001519016 | 1.597013712 | up   |
| B830008M09Rik  | 0.001519308 | 1.869398952 | up   |
| LOC237459      | 0.001519308 | 2.144380093 | down |
| LOC666979      | 0.001519308 | 2.829375744 | up   |
| H3f3b          | 0.00152088  | 1.547369123 | up   |
| Parl           | 0.001524098 | 2.023743391 | down |
| Tulip1-pending | 0.001525456 | 1.561953783 | up   |
| Dlgap4         | 0.001525499 | 1.559213519 | up   |
| Tpcn2          | 0.001526689 | 1.936539292 | up   |
| Cdk5rap3       | 0.001527603 | 1.753373385 | up   |
| Klhl22         | 0.001530132 | 2.581550598 | down |
| 5330401P04Rik  | 0.001532777 | 1.76407373  | down |
| Atp9b          | 0.001533461 | 2.144056559 | up   |
| Bsg            | 0.001536872 | 2.248334885 | down |
| C330011F01Rik  | 0.001536872 | 1.511134982 | up   |
| Dgkh           | 0.001536872 | 1.762007713 | down |
| Gm70           | 0.001536872 | 1.702488422 | down |
| Tarbp2         | 0.001536872 | 1.884200335 | down |
| Gps1           | 0.00153846  | 1.877121568 | down |
| Doc2a          | 0.001543539 | 1.904206038 | up   |
| Eif2a          | 0.00154423  | 1.829097509 | down |
| Atp6v0e2       | 0.001550707 | 3.159582138 | down |
| Fbln2          | 0.001551942 | 2.287607193 | down |
| Fbxl7          | 0.001551942 | 2.45767808  | up   |
| Pax2           | 0.00155239  | 2.120502472 | down |
| Sox5           | 0.00155394  | 3.311142206 | down |
| 2610528E23Rik  | 0.001555066 | 1.52293396  | up   |
| Srd5a1         | 0.001557619 | 1.714048743 | down |
| Sdpr           | 0.001563412 | 2.12800312  | up   |
| Sdccag33l      | 0.001564027 | 1.521818161 | up   |
| Mtus1          | 0.001568072 | 1.660579801 | up   |
| 2310022M17Rik  | 0.001569734 | 1.829479933 | down |
| AI606181       | 0.001570328 | 1.844905257 | up   |
| 9330134C04Rik  | 0.001571285 | 2.420418739 | down |
| Psme4          | 0.001571285 | 2.324461222 | down |
| Ddx10          | 0.001571323 | 1.621686459 | down |
| LOC386124      | 0.001571323 | 3.609391689 | up   |
| Brwd3          | 0.00157639  | 1.557183862 | down |
| LOC100047369   | 0.001578806 | 1.73669529  | up   |
| Snx7           | 0.001579605 | 1.729214668 | down |
| Bub3           | 0.001580322 | 1.503022194 | up   |
| Slc25a36       | 0.001580945 | 2.071575403 | down |
| Ppcs           | 0.00158126  | 1.646772623 | down |
| LOC100042970   | 0.001585056 | 2.779963017 | down |
| Zfp251         | 0.001585056 | 1.50702095  | down |
| Dmrta1         | 0.001586785 | 2.103105068 | down |

|               |             |             |      |
|---------------|-------------|-------------|------|
| Tada1l        | 0.001586785 | 1.913601399 | down |
| Prrc1         | 0.001589601 | 1.73284173  | down |
| A130024K02Rik | 0.001589847 | 1.610862851 | up   |
| Stub1         | 0.001589847 | 1.555882931 | up   |
| Rnf41         | 0.001590438 | 1.687227964 | down |
| Tmem17        | 0.00159099  | 1.602697849 | down |
| A430010E21Rik | 0.001591117 | 1.846939087 | down |
| Arfgap2       | 0.001593373 | 1.901801586 | down |
| LOC385923     | 0.001595054 | 3.489911318 | up   |
| Scrn2         | 0.001599784 | 1.905384302 | up   |
| Pafah2        | 0.001600318 | 1.688534498 | down |
| Eef1b2        | 0.001600423 | 2.762474537 | down |
| Atxn2l        | 0.001602753 | 1.801717997 | up   |
| Sall2         | 0.001602753 | 1.735968947 | up   |
| 2410004N11Rik | 0.001604019 | 2.347200871 | down |
| Zfand1        | 0.001604603 | 1.753351569 | up   |
| LOC100042405  | 0.001605056 | 2.442533732 | down |
| Pdcd10        | 0.001605056 | 1.546079278 | up   |
| Atp1a2        | 0.00160584  | 1.724053264 | down |
| BC018507      | 0.001606414 | 2.608114958 | down |
| Gng12         | 0.001613297 | 1.896968961 | down |
| Jarid1a       | 0.001613297 | 2.408887625 | down |
| Gtf2ird2      | 0.001614828 | 1.557289839 | down |
| Taf6          | 0.001614828 | 1.530599833 | up   |
| Fv1           | 0.001618028 | 1.66173625  | down |
| LOC100043821  | 0.00161852  | 2.191907167 | down |
| Slit2         | 0.001618815 | 2.298761606 | up   |
| Zfp710        | 0.00161959  | 2.375598192 | up   |
| Sugt1         | 0.0016197   | 2.026542902 | up   |
| Marco         | 0.001620732 | 2.083778143 | up   |
| 1110003F10Rik | 0.001620799 | 1.544133306 | up   |
| BC020108      | 0.001620799 | 1.996539354 | down |
| 2410004P22Rik | 0.001621177 | 1.884745359 | up   |
| A130032P05Rik | 0.001621177 | 1.935186505 | down |
| Cytip         | 0.001621177 | 1.794008255 | up   |
| Dctn4         | 0.001621177 | 1.88503623  | down |
| Homer1        | 0.001621177 | 2.069010735 | down |
| Osr1          | 0.001621653 | 1.59414053  | up   |
| Pigq          | 0.001623747 | 1.809014201 | up   |
| Cav1          | 0.001625245 | 2.208571196 | up   |
| Pik3r4        | 0.001629403 | 1.725981116 | up   |
| Grn           | 0.001631639 | 1.720488429 | up   |
| Mrpl13        | 0.001635385 | 1.606062293 | up   |
| 2010320M18Rik | 0.001638621 | 1.842648506 | up   |
| LOC100036521  | 0.001638621 | 2.506390095 | down |
| Sema6a        | 0.001638621 | 1.69858098  | down |
| Vegfc         | 0.001640356 | 1.642066598 | up   |
| Pdha1         | 0.001641727 | 1.731289983 | down |
| Numa1         | 0.001642959 | 1.78566432  | up   |
| Tmem121       | 0.001643751 | 1.742707968 | up   |
| Chd1          | 0.001644403 | 2.344444752 | down |
| Mettl9        | 0.001644471 | 2.650498867 | down |



|               |             |             |      |
|---------------|-------------|-------------|------|
| Peg3          | 0.001648711 | 1.990690827 | down |
| D130027A21Rik | 0.001651892 | 1.68556881  | down |
| Tcf25         | 0.001659302 | 1.569068074 | up   |
| Rab10         | 0.001659577 | 1.990112066 | down |
| Dolpp1        | 0.001660539 | 1.761424422 | down |
| 1810063B07Rik | 0.001663115 | 1.734813452 | up   |
| Pdk3          | 0.001665692 | 1.569211483 | down |
| LOC211870     | 0.001668349 | 1.52379477  | down |
| Olfml2a       | 0.001669301 | 1.618049026 | up   |
| Gsdmdc1       | 0.001669409 | 1.638996959 | up   |
| Setd8         | 0.001671291 | 1.635463357 | up   |
| Nfkb2         | 0.001673096 | 1.831693173 | up   |
| 9630055A16Rik | 0.001673713 | 1.656186342 | up   |
| C230040D10Rik | 0.001677332 | 2.345288515 | up   |
| Cyfp2         | 0.001679672 | 2.030926466 | up   |
| Ano10         | 0.00168038  | 1.689085364 | up   |
| Med24         | 0.001681839 | 2.157135248 | up   |
| Entpd5        | 0.001684655 | 1.689548492 | up   |
| E030003F13Rik | 0.001690843 | 1.536672115 | up   |
| Nit2          | 0.001696434 | 1.530493498 | down |
| Bcl7b         | 0.001696552 | 1.55273211  | up   |
| LOC100045542  | 0.001697203 | 1.512580514 | down |
| Ntn2l         | 0.001697203 | 1.532775641 | up   |
| Dnajb6        | 0.001700736 | 2.975131273 | down |
| Tcof1         | 0.001700736 | 1.891676545 | up   |
| Dleu7         | 0.00170201  | 1.752730727 | down |
| Fpgt          | 0.00170201  | 2.187808037 | down |
| Hoxa9         | 0.001705041 | 1.513581157 | down |
| LOC100047226  | 0.001705268 | 6.351510525 | down |
| Hnrpll        | 0.001706767 | 1.927691698 | down |
| Tgfb1         | 0.001709419 | 2.340261459 | down |
| Nt5c3l        | 0.001714637 | 2.24591589  | down |
| Itch          | 0.001718073 | 2.403063536 | down |
| Cugbp1        | 0.001720298 | 1.709599137 | down |
| EG329521      | 0.001720472 | 1.981694102 | up   |
| Zfp292        | 0.001722273 | 1.720644236 | up   |
| Piasg-pending | 0.001723063 | 1.719383478 | up   |
| Basp1         | 0.00172614  | 1.86092639  | down |
| Gal3st1       | 0.001727437 | 2.106734753 | down |
| Trim23        | 0.001730253 | 1.913262248 | down |
| Tbkbp1        | 0.001732204 | 1.849165797 | up   |
| Caskin2       | 0.001732909 | 1.535313368 | up   |
| EG434402      | 0.001733374 | 1.599641442 | up   |
| Csgalnact1    | 0.001735196 | 1.569012284 | up   |
| Aurkb         | 0.001735869 | 1.863275528 | down |
| LOC677375     | 0.001735959 | 1.691161037 | up   |
| Nudt22        | 0.001735959 | 1.868268132 | up   |
| Mgat1         | 0.001736927 | 1.678864241 | up   |
| Sgk3          | 0.001737422 | 1.572519541 | down |
| Slc25a28      | 0.001737422 | 2.085822582 | up   |
| Txn1l         | 0.001738417 | 1.59683907  | up   |
| Ikzf2         | 0.001738703 | 1.786896586 | up   |

|               |             |             |      |
|---------------|-------------|-------------|------|
| Mme           | 0.001738753 | 1.818969607 | down |
| Mdm1          | 0.001739094 | 1.698763251 | down |
| Tug1          | 0.00174318  | 1.609519005 | down |
| Hoxa13        | 0.001744016 | 1.642590165 | down |
| Znfx1         | 0.001745367 | 1.606839299 | up   |
| Fam134c       | 0.001749054 | 1.92955792  | down |
| A730070K21Rik | 0.001749973 | 1.934476972 | up   |
| Pdia4         | 0.001750231 | 2.300646305 | down |
| Pex5          | 0.001750474 | 1.527123094 | down |
| EG666577      | 0.001751881 | 2.477158308 | down |
| Il10rb        | 0.001754641 | 1.542899132 | up   |
| LOC100047113  | 0.001754641 | 2.024441004 | up   |
| Zc3h14        | 0.001757435 | 2.326521874 | down |
| Spn           | 0.001758503 | 2.516223431 | up   |
| LOC100047369  | 0.0017602   | 1.506572962 | up   |
| Gbf1          | 0.001761413 | 1.788582444 | up   |
| Solh          | 0.001762503 | 1.840117693 | up   |
| Fndc4         | 0.001764954 | 1.521905541 | up   |
| Gna14         | 0.001769265 | 1.7251333   | down |
| Tipin         | 0.001770314 | 2.371179581 | down |
| LOC676912     | 0.001770897 | 1.785675168 | up   |
| LOC667475     | 0.001772246 | 1.634959698 | up   |
| 0610031J06Rik | 0.001773255 | 1.684084058 | up   |
| C030025P15Rik | 0.001781111 | 2.218602419 | down |
| Coro1a        | 0.001782953 | 3.400266171 | up   |
| B4galt4       | 0.00178407  | 1.505052447 | up   |
| Al225934      | 0.001786163 | 2.097738504 | up   |
| Lrfn5         | 0.00179439  | 2.241804123 | up   |
| LOC671434     | 0.001795169 | 1.62929523  | up   |
| LOC633238     | 0.001796207 | 1.585783958 | down |
| Al427122      | 0.001796627 | 1.602066994 | down |
| Cul2          | 0.001796627 | 1.710577726 | down |
| Slc36a1       | 0.001802321 | 1.776494861 | up   |
| Gnb5          | 0.001805841 | 2.050322056 | down |
| LOC100039636  | 0.001810243 | 1.9667418   | up   |
| LOC381684     | 0.001813858 | 1.768771052 | up   |
| Ccdc28b       | 0.001816701 | 1.578166843 | up   |
| Baz2a         | 0.001817902 | 1.747635245 | up   |
| Atox1         | 0.001820736 | 1.708862066 | up   |
| Plcg2         | 0.001820884 | 2.247225523 | up   |
| Rpp30         | 0.00182152  | 1.884821892 | down |
| Crim1         | 0.001823318 | 2.418887138 | down |
| LOC100046406  | 0.001823318 | 1.998743773 | down |
| Wdr24         | 0.001827229 | 1.558735728 | up   |
| 3000004C01Rik | 0.001827573 | 1.734568477 | up   |
| Gemin5        | 0.001827573 | 1.516962171 | up   |
| Tmtc2         | 0.001835532 | 1.787765741 | down |
| Mapkapk3      | 0.001835664 | 1.658428311 | up   |
| Chd7          | 0.001836177 | 1.861780882 | down |
| Atp5k         | 0.001837584 | 1.777037382 | up   |
| Tspan13       | 0.001837802 | 1.86756146  | up   |
| Cyp1b1        | 0.00183787  | 2.115233183 | down |

|                |             |             |      |
|----------------|-------------|-------------|------|
| Mar-07         | 0.001839083 | 3.636689901 | down |
| LOC327995      | 0.001847482 | 1.552106977 | down |
| Luzp1          | 0.001848537 | 1.670756698 | up   |
| Herpud1        | 0.001848892 | 2.375756979 | down |
| scl0004158.1_6 | 0.001849017 | 1.811247468 | down |
| Pfn2           | 0.001851165 | 2.781931877 | down |
| B230114H05Rik  | 0.001854865 | 2.035285711 | down |
| Rasgrp4        | 0.001855768 | 1.526313663 | up   |
| LOC100047028   | 0.001856763 | 1.797136545 | up   |
| Rnu65          | 0.001856888 | 1.699950337 | down |
| Pigu           | 0.001858055 | 2.101835489 | down |
| BC027231       | 0.001858352 | 1.573701859 | down |
| Evi1           | 0.001858352 | 2.445608139 | down |
| 0610007P22Rik  | 0.0018607   | 1.7022053   | up   |
| Iars           | 0.00186703  | 1.529809594 | down |
| Smc1a          | 0.001867339 | 2.085639    | down |
| Sh3tc2         | 0.001867906 | 1.793392062 | down |
| LOC100047264   | 0.001869478 | 1.626560092 | up   |
| Zc3h18         | 0.001872035 | 1.691239238 | up   |
| Rab32          | 0.001873077 | 1.738201737 | up   |
| Laptm4a        | 0.001875477 | 1.861602426 | down |
| Apobec1        | 0.001877209 | 2.472486019 | up   |
| C87860         | 0.001878563 | 1.643683076 | up   |
| Pole3          | 0.001878827 | 1.687413931 | down |
| 6530415P06Rik  | 0.001878876 | 1.596873164 | up   |
| LOC383099      | 0.001880546 | 1.546484113 | up   |
| A830033B12Rik  | 0.001881454 | 1.523454428 | up   |
| Ap1g1          | 0.001881454 | 1.656102896 | down |
| Tex2           | 0.001882752 | 1.597836733 | up   |
| Slc4a3         | 0.001883361 | 1.932770133 | up   |
| Alkbh7         | 0.001885851 | 1.698295236 | up   |
| LOC100044566   | 0.001885851 | 1.555592299 | up   |
| LOC100043257   | 0.001886637 | 6.89162159  | down |
| Rasgrp3        | 0.001886637 | 1.777761817 | up   |
| Spg7           | 0.001892713 | 1.784437299 | up   |
| Siat7b         | 0.0018955   | 1.969845414 | up   |
| A030011F13Rik  | 0.001895677 | 2.390878916 | up   |
| Col9a3         | 0.001897846 | 1.575743914 | down |
| A130052C08Rik  | 0.001900251 | 1.804756999 | up   |
| Pcm1           | 0.001900251 | 2.782887936 | up   |
| 1300010F03Rik  | 0.00190052  | 1.801385999 | up   |
| Lyl1           | 0.001901323 | 2.016277552 | up   |
| Ppbp           | 0.001901323 | 1.834048271 | up   |
| Rgp1           | 0.001903786 | 2.53849411  | up   |
| Mtmr7          | 0.001906075 | 1.851805091 | up   |
| Pdk2           | 0.001906501 | 1.658661246 | up   |
| Icosl          | 0.00190684  | 2.403559446 | up   |
| BC030336       | 0.001908229 | 1.722659946 | down |
| Mtap7d1        | 0.001908229 | 1.89144969  | up   |
| Nfkbil2        | 0.001912505 | 1.967721105 | up   |
| A430104N18Rik  | 0.001912525 | 1.602636814 | up   |
| 2610524H06Rik  | 0.001912558 | 2.231719017 | down |

|                 |             |             |      |
|-----------------|-------------|-------------|------|
| Vkorc1l1        | 0.001912565 | 1.789702892 | down |
| Ulk2            | 0.001915245 | 1.989941478 | down |
| Ppic            | 0.00191558  | 2.057356834 | down |
| Tm7sf2          | 0.00191558  | 1.531668782 | up   |
| Rps24           | 0.001915694 | 1.870081425 | down |
| Tuba3a          | 0.001919    | 2.150995016 | up   |
| Trim62          | 0.001922617 | 2.022188902 | up   |
| Fes             | 0.001927638 | 2.007770538 | up   |
| Fgd2            | 0.001927638 | 2.169153452 | up   |
| Smg5            | 0.001927959 | 1.648031116 | up   |
| Plekhg2         | 0.001931971 | 1.521012306 | up   |
| LOC100047323    | 0.001934442 | 1.564939857 | down |
| LOC636687       | 0.001935392 | 2.509327173 | up   |
| Cacna1h         | 0.001938712 | 1.579277396 | up   |
| BC046331        | 0.001940191 | 1.535637379 | down |
| Cspp1           | 0.001940311 | 1.543517828 | up   |
| LOC100047052    | 0.001940588 | 1.683980346 | down |
| Scoc            | 0.001940588 | 1.64788878  | up   |
| Frap1           | 0.001941006 | 1.817364335 | up   |
| Cpt1c           | 0.001942442 | 1.715048313 | up   |
| Snw1            | 0.001942691 | 1.60593462  | up   |
| 4930553M18Rik   | 0.001943397 | 1.963382483 | down |
| Emd             | 0.001943397 | 2.590956211 | down |
| Ing2            | 0.001943709 | 1.628379822 | up   |
| Ppp1r13b        | 0.001944209 | 1.653621316 | up   |
| Hel308          | 0.001945112 | 1.555132389 | down |
| Pcdh7           | 0.001945707 | 1.514340878 | up   |
| 9330132O05Rik   | 0.001956617 | 1.527526259 | up   |
| Rad51ap1        | 0.001956617 | 1.817406774 | down |
| Bre             | 0.00195725  | 1.52516079  | up   |
| Itga11          | 0.00195725  | 1.52748549  | down |
| Rspo2           | 0.00196096  | 1.641341209 | up   |
| Usf2            | 0.00196096  | 1.963961601 | down |
| Spcs2           | 0.001962723 | 1.929940462 | up   |
| Eif2s1          | 0.001963971 | 1.641513586 | down |
| Dnaja2          | 0.001964087 | 2.192937136 | up   |
| 2310007D09Rik   | 0.001965489 | 1.524571419 | down |
| Dock7           | 0.00196553  | 1.502476454 | down |
| Tmco1           | 0.001969233 | 1.563940764 | down |
| Tnfaip8         | 0.001973097 | 1.601357222 | down |
| Nup37           | 0.001979683 | 1.984605551 | down |
| 2610020H08Rik   | 0.001981164 | 1.668486714 | up   |
| Pex7            | 0.00198469  | 1.907020807 | down |
| Cblb            | 0.001985817 | 2.736266136 | up   |
| Qtrtd1          | 0.001986937 | 2.600658417 | down |
| Gtf2a1          | 0.001988764 | 1.520989418 | down |
| Mcm6            | 0.0019918   | 1.965644717 | down |
| Fam120a         | 0.001993029 | 3.189107657 | down |
| LOC633360       | 0.001994324 | 1.542422175 | up   |
| Nrf1            | 0.001994324 | 1.500810623 | up   |
| scl0003155.1_68 | 0.002003255 | 1.726139426 | up   |
| Eif3s3          | 0.002010128 | 3.195585966 | down |

|                   |             |             |      |
|-------------------|-------------|-------------|------|
| Foxf2             | 0.002010128 | 2.093223333 | up   |
| Mtf2              | 0.002010128 | 1.923413634 | down |
| 4833439L19Rik     | 0.002012783 | 2.039529562 | down |
| Znrd1             | 0.002026417 | 1.685640454 | down |
| LOC677317         | 0.002029461 | 1.87910068  | down |
| 5830461H18Rik     | 0.002029988 | 1.510795474 | up   |
| Cd200             | 0.002030281 | 1.843048215 | down |
| 4933415A04Rik     | 0.002032043 | 1.667817354 | up   |
| Usp28             | 0.002035776 | 2.089029074 | up   |
| 2310036O22Rik     | 0.00203688  | 1.892043948 | up   |
| Sfrp2             | 0.00203688  | 2.048348904 | down |
| Thnsl2            | 0.002038064 | 1.551214695 | up   |
| Agpat6            | 0.002039883 | 1.585151076 | up   |
| 1200003I07Rik     | 0.002040671 | 1.990882516 | up   |
| Glod4             | 0.002043503 | 1.803373098 | up   |
| Rab13             | 0.002050773 | 1.627658963 | down |
| Cux1              | 0.002050937 | 1.542415023 | up   |
| D630016P04Rik     | 0.002050937 | 1.516773701 | up   |
| Prickle3          | 0.002050967 | 1.527388811 | up   |
| Atg5              | 0.002055903 | 1.744779706 | down |
| 9330151E04Rik     | 0.002057609 | 1.65166688  | up   |
| Pabpc1            | 0.002057609 | 2.18592906  | down |
| LOC677248         | 0.002058981 | 1.753391981 | down |
| Dbc1              | 0.002059791 | 1.534218311 | up   |
| 1190007I07Rik     | 0.002060189 | 1.608626485 | up   |
| Hhex              | 0.002062186 | 1.857045531 | up   |
| scl0002194.1_2265 | 0.002071402 | 1.694530249 | up   |
| Afap1             | 0.00207586  | 2.008570194 | up   |
| Mapk12            | 0.002077594 | 1.643838286 | up   |
| Fchsd2            | 0.002079711 | 1.642267704 | down |
| Grik5             | 0.00208099  | 2.054666758 | up   |
| Thra              | 0.00208475  | 1.508067846 | up   |
| Wdr23             | 0.002086002 | 2.06183219  | up   |
| Gpr65             | 0.002094452 | 2.370083809 | up   |
| Lphn1             | 0.002094672 | 1.962758541 | up   |
| Synj2bp           | 0.002097165 | 2.245429277 | down |
| LOC100043703      | 0.002103693 | 2.17633009  | up   |
| Egfl7             | 0.002111255 | 1.795167565 | up   |
| Stard7            | 0.002111255 | 2.118120194 | down |
| Cd109             | 0.002116086 | 1.708335042 | down |
| Nmu               | 0.002116086 | 2.020240068 | down |
| LOC100041585      | 0.002117464 | 1.855309486 | up   |
| Napb              | 0.002120789 | 1.901234865 | up   |
| Klf8              | 0.002123433 | 1.52449286  | up   |
| 9430098F02Rik     | 0.002125027 | 1.514325261 | up   |
| Smtn              | 0.002125167 | 1.901681423 | up   |
| H2-K1             | 0.002125636 | 1.562729001 | up   |
| Olfr1513          | 0.002131261 | 1.558538675 | down |
| 1810073N04Rik     | 0.002131706 | 1.694420219 | up   |
| Clec16a           | 0.002132251 | 1.86718154  | up   |
| Cdkn2aip          | 0.002137565 | 1.746379733 | up   |
| Hook1             | 0.002137565 | 2.538444281 | down |

|                |             |             |      |
|----------------|-------------|-------------|------|
| Mrg1           | 0.002137565 | 1.852821708 | up   |
| 4632415L05Rik  | 0.002139082 | 1.767496824 | up   |
| ltgb5          | 0.00213987  | 1.791575909 | up   |
| Glul           | 0.00214331  | 2.251183271 | up   |
| Eya1           | 0.002144204 | 1.914695263 | down |
| Tlcd2          | 0.002146171 | 1.564034581 | down |
| 6330409N04Rik  | 0.002146994 | 1.826803684 | down |
| Ddx6           | 0.00214763  | 3.527591467 | up   |
| 2410018M08Rik  | 0.002147717 | 1.512026787 | up   |
| 9030203C11Rik  | 0.002147717 | 1.53328979  | up   |
| A230106D06Rik  | 0.002147717 | 1.654462457 | up   |
| Dpysl2         | 0.002147717 | 1.98444128  | up   |
| Dennd2a        | 0.002157983 | 1.606284261 | up   |
| Ercc4          | 0.002158399 | 1.557668924 | up   |
| Cpne3          | 0.002158849 | 1.571391106 | down |
| D930015E06Rik  | 0.00216051  | 1.57091701  | up   |
| Snx4           | 0.00216051  | 1.918561816 | up   |
| 2510049I19Rik  | 0.002166731 | 1.586477399 | up   |
| 9030607L17Rik  | 0.002166731 | 1.525445223 | down |
| 1700037H04Rik  | 0.002167488 | 1.740111709 | up   |
| LOC100044008   | 0.002171397 | 1.53608489  | down |
| scl0002215.1_2 | 0.002171397 | 1.878153324 | down |
| Cul1           | 0.002172185 | 1.637100816 | up   |
| Ncbp2          | 0.002172185 | 2.439580679 | down |
| Slc35f1        | 0.002172185 | 2.190327406 | down |
| B930008G09Rik  | 0.002178293 | 1.690303683 | up   |
| Map2k5         | 0.00218253  | 1.849451542 | up   |
| Ttc15          | 0.002184878 | 1.531815052 | up   |
| Taf13          | 0.002185647 | 1.507123232 | up   |
| Gmfg           | 0.002188983 | 2.311543703 | up   |
| Ormdl3         | 0.002189454 | 1.710891962 | up   |
| Synpo          | 0.002195345 | 1.866822839 | down |
| Tmem45a        | 0.002196654 | 4.09446907  | down |
| LOC244710      | 0.002196939 | 1.854791403 | up   |
| 0610007P08Rik  | 0.002201536 | 1.747234583 | down |
| 1110012D08Rik  | 0.002201536 | 1.561735511 | up   |
| Larp4          | 0.00220346  | 2.362384558 | down |
| A330049M08Rik  | 0.002205816 | 2.046452045 | down |
| Appbp2         | 0.00220862  | 1.773905993 | down |
| Galnt14        | 0.002208981 | 1.679883838 | up   |
| Raet1c         | 0.002215961 | 2.150902033 | down |
| Hist1h3h       | 0.002216293 | 1.736517668 | down |
| Sep-09         | 0.002218351 | 2.099341631 | up   |
| LOC100048616   | 0.00222248  | 1.53417325  | up   |
| Klhl24         | 0.00222349  | 1.923350453 | down |
| EG384179       | 0.002223998 | 1.954072833 | up   |
| Cdc5l          | 0.002229116 | 1.562691808 | down |
| LOC100044160   | 0.002229726 | 2.071153402 | down |
| Surf1          | 0.002235074 | 1.572135568 | down |
| 5630401D24Rik  | 0.002235957 | 1.859439254 | down |
| Mier2          | 0.002243793 | 1.528760314 | down |
| Mpp2           | 0.002244097 | 1.561196923 | up   |

|                |             |             |      |
|----------------|-------------|-------------|------|
| Gng4           | 0.002244691 | 1.594417691 | up   |
| Nbea           | 0.002247198 | 1.603463292 | down |
| Gpbp111        | 0.002249725 | 2.00600338  | down |
| Nfe2l2         | 0.002250218 | 2.164215803 | down |
| Ddx58          | 0.002253005 | 1.632380843 | down |
| Flt1           | 0.002254746 | 2.435525656 | up   |
| scl000260.1_64 | 0.002254746 | 1.689574122 | up   |
| Rnf31          | 0.002257364 | 1.935285211 | up   |
| Rac2           | 0.002257895 | 1.805455566 | up   |
| Msx1           | 0.002262195 | 1.988319874 | up   |
| Psmc6          | 0.002262195 | 2.036067009 | up   |
| Suv420h1       | 0.002262195 | 1.513921738 | down |
| Psmc5          | 0.002267337 | 1.573473096 | up   |
| 1500041N16Rik  | 0.002276686 | 1.863206625 | up   |
| S100a1         | 0.002282376 | 1.660141587 | down |
| 1700023F06Rik  | 0.002282755 | 1.644182205 | up   |
| Ipmk           | 0.002285496 | 1.674729943 | down |
| Ebi3           | 0.002286487 | 1.833338022 | up   |
| Lip1           | 0.002286487 | 2.74720335  | up   |
| Sin3a          | 0.002287821 | 1.715649724 | up   |
| LOC100047358   | 0.002291952 | 1.578546643 | up   |
| Vdac3          | 0.002292387 | 2.138645887 | up   |
| Dnaja2         | 0.0022962   | 1.603211403 | up   |
| Slitrk6        | 0.002297598 | 1.623122454 | down |
| Apoc1          | 0.002302005 | 2.393418551 | up   |
| Sorbs2         | 0.002308401 | 1.909857392 | down |
| Ube2a          | 0.002309647 | 1.672432542 | down |
| D430034A07Rik  | 0.002310419 | 3.2743752   | up   |
| Ube2q1         | 0.00231388  | 1.58532691  | down |
| C530028I08Rik  | 0.002320393 | 1.539510965 | down |
| Setd6          | 0.002320393 | 1.965571165 | up   |
| Palld          | 0.002321384 | 2.444493532 | up   |
| Ndufa10        | 0.00232256  | 1.53215611  | up   |
| Foxj3          | 0.002331779 | 1.773408651 | down |
| Anp32e         | 0.002335056 | 2.025931835 | down |
| Mbnl2          | 0.002335056 | 1.756134391 | down |
| 2810410M20Rik  | 0.002335154 | 1.631465673 | down |
| Asb7           | 0.002336466 | 1.655183196 | down |
| Zcchc6         | 0.002336466 | 2.124472618 | up   |
| Cd68           | 0.002339354 | 2.921685934 | up   |
| Hsf2           | 0.002339354 | 1.642094493 | up   |
| BC053749       | 0.002340072 | 1.623446345 | up   |
| Lsm1           | 0.002341598 | 1.744793415 | up   |
| LOC100045315   | 0.00234549  | 2.115972996 | up   |
| Tjp1           | 0.002347473 | 1.73206842  | up   |
| BC100530       | 0.002353143 | 1.717787862 | up   |
| Kifc1          | 0.002353143 | 1.527059317 | down |
| Oip5           | 0.002358764 | 1.800255418 | down |
| LOC215098      | 0.002365091 | 1.655896902 | up   |
| Iffo1          | 0.00237136  | 1.659404159 | up   |
| Yipf3          | 0.002376053 | 1.588621855 | down |
| Plcb3          | 0.002383994 | 1.559627295 | up   |

|                  |             |             |      |
|------------------|-------------|-------------|------|
| Gabpb1           | 0.002384795 | 2.433291197 | down |
| Ids              | 0.002390439 | 1.509627938 | down |
| Prei4            | 0.002401591 | 1.993774176 | down |
| Garnl1           | 0.002402388 | 2.193291664 | up   |
| Lysmd2           | 0.002402877 | 1.52040875  | down |
| Fzd4             | 0.002404447 | 2.080604315 | down |
| Anxa6            | 0.002406488 | 1.643139124 | up   |
| A530025E09Rik    | 0.002407322 | 2.522298098 | up   |
| Fbf1             | 0.002407322 | 2.009415865 | up   |
| Adat1            | 0.002407497 | 1.746153474 | up   |
| Ptn              | 0.002407497 | 1.975698113 | down |
| Sars             | 0.00241001  | 1.554883003 | up   |
| Irx3             | 0.002411333 | 1.500570893 | down |
| Pnkp             | 0.002411333 | 1.556210995 | up   |
| Atrn             | 0.002417642 | 1.609615684 | down |
| EG434077         | 0.002417642 | 1.663578391 | up   |
| 4932417H02Rik    | 0.00242601  | 1.55621779  | up   |
| 2810474O19Rik    | 0.002431129 | 1.64081192  | up   |
| Kif21a           | 0.002432398 | 2.268258572 | down |
| Cyr61            | 0.002435529 | 3.337931395 | down |
| C130020P16Rik    | 0.002435677 | 1.939721704 | up   |
| Tgoln1           | 0.002437156 | 1.883389592 | down |
| Dorz1            | 0.00243943  | 1.6090765   | up   |
| A930002F06Rik    | 0.00243982  | 1.862867117 | up   |
| Ptprf            | 0.00244168  | 1.939987421 | down |
| E430021A19Rik    | 0.002447014 | 1.878671646 | down |
| Mynn             | 0.002452383 | 1.664409757 | down |
| Pacs1            | 0.002460053 | 1.611176252 | up   |
| Lrrc1            | 0.002462651 | 1.585395694 | down |
| Scamp3           | 0.002462962 | 1.615253449 | up   |
| Zfp7             | 0.002473105 | 1.537599683 | up   |
| LOC218696        | 0.002476638 | 4.27033329  | down |
| Cryba4           | 0.002480959 | 2.113610029 | up   |
| 9626984_149_rc   | 0.002486456 | 3.164788723 | up   |
| Bat2             | 0.002486974 | 2.895119667 | up   |
| LOC100048413     | 0.002488584 | 1.756552696 | down |
| Mr1              | 0.002488584 | 1.554100752 | up   |
| Birc5            | 0.002491882 | 2.299828529 | down |
| D030049N18Rik    | 0.0024983   | 1.760187149 | up   |
| A830007N09Rik    | 0.002499007 | 1.578349233 | down |
| 2010106G01Rik    | 0.002499791 | 2.39048624  | down |
| scl0001248.1_219 | 0.00250389  | 1.583583832 | up   |
| Tssc4            | 0.002510635 | 1.620042682 | down |
| Top3a            | 0.002512422 | 1.544467807 | up   |
| Brp44            | 0.002512526 | 1.769845605 | down |
| Copz1            | 0.002512526 | 1.980276108 | up   |
| Pds5a            | 0.002512719 | 1.875946164 | down |
| Pcbp1            | 0.002517761 | 2.539755344 | down |
| Zubr1            | 0.002517834 | 1.615913987 | down |
| Ralgds           | 0.002520801 | 1.746110797 | down |
| 4921533J23Rik    | 0.002524715 | 1.653480768 | down |
| Tomm7            | 0.002532667 | 1.536461711 | down |



|                |             |             |      |
|----------------|-------------|-------------|------|
| Dhx36          | 0.00253662  | 1.817358971 | down |
| Zfp90          | 0.002537745 | 1.724294186 | up   |
| scl0003955.1_3 | 0.002538818 | 1.924738407 | down |
| Xylt2          | 0.002538818 | 1.902259708 | up   |
| 1700030K09Rik  | 0.002541271 | 1.665150762 | up   |
| Mfi2           | 0.002541271 | 2.146121979 | down |
| Eif3b          | 0.002542288 | 1.67359066  | down |
| Socs4          | 0.002542288 | 1.771161676 | down |
| Rere           | 0.002542503 | 1.924082041 | up   |
| A130028H19Rik  | 0.002544112 | 2.485955238 | up   |
| LOC100048873   | 0.002544112 | 1.638649702 | down |
| 2210408E11Rik  | 0.002546777 | 2.306398869 | up   |
| Tanc1          | 0.00254755  | 1.740174651 | up   |
| Cep78          | 0.002549191 | 1.997898817 | down |
| Rgs12          | 0.002549191 | 1.830780387 | up   |
| Zfp238         | 0.002551324 | 2.892208099 | down |
| E430033D06Rik  | 0.002558084 | 1.992217302 | down |
| Il13ra1        | 0.002558718 | 1.503205299 | down |
| Dnajb9         | 0.002566281 | 2.115036011 | up   |
| Rab8a          | 0.002570099 | 1.825872421 | up   |
| Arhgef19       | 0.002578699 | 1.560842991 | down |
| Fgfr2          | 0.002580701 | 1.686376214 | down |
| E330023A07Rik  | 0.002581904 | 1.624966502 | up   |
| 2610040L17Rik  | 0.002586816 | 1.903311849 | up   |
| Alkbh2         | 0.002589673 | 1.567934513 | up   |
| Chd6           | 0.002602232 | 1.612116575 | up   |
| Aqr            | 0.00260475  | 1.522784352 | up   |
| A830081I03Rik  | 0.002611067 | 1.919531226 | up   |
| Cpeb2          | 0.00261253  | 2.725927591 | up   |
| B930030B22Rik  | 0.002617911 | 1.634834886 | up   |
| Cebpa          | 0.002617911 | 1.874682903 | up   |
| Tacr1          | 0.002622459 | 1.609485507 | up   |
| Cd24a          | 0.00262282  | 1.825586438 | up   |
| 2510012J08Rik  | 0.002623608 | 1.865270853 | up   |
| Emp1           | 0.002623997 | 1.872230411 | down |
| 2010110K16Rik  | 0.002626244 | 1.875836492 | up   |
| Wnt11          | 0.002628996 | 1.79390502  | up   |
| Sox4           | 0.00264353  | 2.331992149 | up   |
| Hmox1          | 0.002646113 | 4.230695725 | up   |
| Mafb           | 0.002647133 | 1.670907617 | up   |
| Ncoa6ip        | 0.002648315 | 2.249891758 | down |
| Fads2          | 0.002649836 | 1.512167692 | down |
| Banf1          | 0.002650066 | 1.812149763 | down |
| Pla2g7         | 0.002650066 | 2.027091265 | up   |
| 0610025P10Rik  | 0.002663985 | 1.50643301  | up   |
| LOC667519      | 0.002663985 | 1.549097538 | up   |
| 2810035J02Rik  | 0.002668471 | 1.548156023 | down |
| LOC382461      | 0.002672095 | 1.692812443 | up   |
| 4632404B13Rik  | 0.002676508 | 1.557106257 | up   |
| Ndufa4         | 0.002681188 | 1.763020635 | down |
| Capg           | 0.002692421 | 2.358724833 | up   |
| Nploc4         | 0.002695672 | 1.832088232 | up   |

|                   |             |             |      |
|-------------------|-------------|-------------|------|
| Dnaja1            | 0.002699814 | 1.560367584 | down |
| Ttyh3             | 0.002708223 | 1.897138476 | up   |
| Arv1              | 0.002717935 | 1.637090802 | up   |
| Tor1aip2          | 0.00272261  | 1.568573952 | down |
| Mark1             | 0.002725736 | 2.202377558 | down |
| C130085D15Rik     | 0.00272787  | 3.126176596 | up   |
| 3110005L21Rik     | 0.002730418 | 1.762537122 | up   |
| Mgea5             | 0.002737651 | 2.561894417 | up   |
| Polb              | 0.00274035  | 2.14051652  | up   |
| Sfpi1             | 0.00274035  | 1.619255185 | up   |
| Ptgfrn            | 0.00274057  | 1.626416445 | up   |
| Slc44a1           | 0.002740736 | 1.844552755 | down |
| Rab43             | 0.002746571 | 1.902474165 | up   |
| 2310047K21Rik     | 0.002749248 | 1.717386007 | down |
| Rad51ap1          | 0.002753431 | 1.511897922 | down |
| Tirap             | 0.002754319 | 1.974227786 | up   |
| 5430439M09Rik     | 0.002754585 | 1.632367969 | up   |
| Atp5j             | 0.002763231 | 1.566173673 | up   |
| LOC100044294      | 0.002763231 | 1.602988362 | up   |
| Gripap1           | 0.002763337 | 1.705757141 | up   |
| Foxj3             | 0.002766586 | 1.661810517 | down |
| 3110001N23Rik     | 0.002771197 | 2.28801322  | up   |
| C430046P22Rik     | 0.002774326 | 1.611743212 | up   |
| Rnf11             | 0.00277471  | 1.990785837 | down |
| scl0002702.1_3805 | 0.00277471  | 2.788537741 | up   |
| Serping1          | 0.00277471  | 1.609072208 | up   |
| Lonrf1            | 0.00277823  | 2.00988245  | down |
| 2510002P07Rik     | 0.002780714 | 1.605831385 | up   |
| Ube2h             | 0.002780714 | 1.870797277 | up   |
| Zc3h13            | 0.002780714 | 2.074283838 | down |
| Ctsz              | 0.002787254 | 2.486199141 | up   |
| Btbd4             | 0.002790525 | 1.588028908 | up   |
| Ss18              | 0.002808195 | 1.854062438 | down |
| D230047F17Rik     | 0.002809201 | 1.766026139 | up   |
| Swap70            | 0.0028093   | 1.667887688 | down |
| Tmem161b          | 0.002810037 | 1.719977498 | up   |
| Ecm1              | 0.002811815 | 1.867858887 | up   |
| D430007A19Rik     | 0.002814274 | 2.307518244 | up   |
| Ywhae             | 0.002820566 | 1.634682298 | up   |
| Amotl2            | 0.002824668 | 1.523490906 | down |
| Pcdh10            | 0.002824668 | 1.62713182  | up   |
| Mepce             | 0.002825152 | 2.317586184 | up   |
| LOC100048733      | 0.002828371 | 1.577328682 | down |
| Med25             | 0.002828691 | 1.673347831 | down |
| 1110019N10Rik     | 0.002829903 | 1.651130676 | down |
| A430024B14Rik     | 0.002833771 | 1.698749542 | up   |
| 5630401D24Rik     | 0.002835221 | 1.60729599  | down |
| 2810031B20Rik     | 0.002837298 | 1.691209316 | down |
| C130092F19Rik     | 0.002838582 | 1.676192164 | up   |
| Zfp184            | 0.002842752 | 1.631226897 | up   |
| Stk32a            | 0.002842809 | 1.641725421 | down |
| Fbxo6             | 0.002843662 | 1.553890586 | up   |

|               |             |             |      |
|---------------|-------------|-------------|------|
| Mapre2        | 0.002843662 | 1.639342785 | up   |
| E130007O11Rik | 0.00284629  | 1.509031296 | down |
| 6720420G18Rik | 0.002850026 | 1.712918878 | up   |
| Eif3b         | 0.002854191 | 1.806540251 | down |
| Atpaf2        | 0.002855776 | 1.50365603  | up   |
| Tmem18        | 0.00285628  | 1.606968403 | up   |
| 2610524F24Rik | 0.002856288 | 1.626529932 | down |
| C230064E07Rik | 0.002857576 | 1.695591331 | up   |
| P2rx4         | 0.002862276 | 1.588501096 | down |
| Lime1         | 0.002862613 | 2.06583643  | up   |
| E130010O04Rik | 0.002871746 | 1.539424777 | up   |
| Coro1c        | 0.002875337 | 1.947839379 | up   |
| 8430403M15Rik | 0.002878809 | 1.831468344 | down |
| Cd79b         | 0.002887198 | 1.883948922 | up   |
| Arfip2        | 0.00290119  | 1.551674247 | down |
| Atp2c1        | 0.002903612 | 1.642340541 | down |
| Fbln1         | 0.002903612 | 2.065477371 | up   |
| Rnf25         | 0.00290968  | 1.781982064 | up   |
| Gnb2          | 0.002914946 | 1.623925328 | up   |
| Jmy           | 0.002924739 | 1.592119217 | down |
| Zbtb43        | 0.002925053 | 1.658994556 | up   |
| Pip4k2b       | 0.002929294 | 2.198315144 | up   |
| 1500010G04Rik | 0.002934441 | 2.523571014 | up   |
| Itgb3bp       | 0.002934441 | 2.053759575 | down |
| Lpxn          | 0.002936035 | 1.77714169  | up   |
| 4732423C17Rik | 0.002945351 | 1.73161602  | down |
| Rbm6          | 0.002948351 | 2.289750576 | down |
| Kcnn1         | 0.002959336 | 1.893638134 | up   |
| LOC100043402  | 0.002959336 | 3.02442193  | up   |
| Prpf40b       | 0.002964168 | 1.827224493 | up   |
| Rab22a        | 0.002964169 | 1.512351275 | up   |
| Sec61b        | 0.002964169 | 1.852417946 | down |
| Rasa1         | 0.002966602 | 1.986502409 | down |
| Papd4         | 0.002972011 | 1.622642875 | down |
| Slc8a1        | 0.002972388 | 1.83786571  | up   |
| LOC331511     | 0.002984675 | 1.938384652 | up   |
| Man2b1        | 0.002985806 | 1.862970471 | up   |
| Glrp          | 0.00299762  | 1.528977275 | down |
| Commd6        | 0.002998698 | 1.511464834 | down |
| Nfam1         | 0.002999326 | 2.417654753 | up   |
| Pou2f1        | 0.002999326 | 2.454018354 | up   |
| Stk18         | 0.002999326 | 1.515773654 | up   |
| Hira          | 0.003000919 | 1.590050817 | down |
| Map3k4        | 0.003000919 | 2.181895018 | up   |
| Nup160        | 0.003000919 | 2.067004204 | down |
| E130319N12Rik | 0.003009267 | 1.858166337 | down |
| A430110M15Rik | 0.003010085 | 2.050303698 | up   |
| Pard6a        | 0.003011633 | 1.696772218 | down |
| Psemb3        | 0.003013288 | 1.576965928 | down |
| Cetn2         | 0.003029562 | 2.201985121 | down |
| Plekhm1       | 0.003043939 | 2.258257389 | up   |
| Schip1        | 0.003047182 | 2.145208836 | down |

|               |             |             |      |
|---------------|-------------|-------------|------|
| LOC268602     | 0.003047623 | 1.63210392  | down |
| Hist1h3d      | 0.00305236  | 1.663193345 | down |
| 5930422O12Rik | 0.003059425 | 1.745453954 | up   |
| Sdhc          | 0.003059425 | 1.559278846 | up   |
| EG434401      | 0.003060069 | 1.665538073 | up   |
| 2310047M15Rik | 0.003065793 | 1.522659063 | up   |
| 9130213B05Rik | 0.003068462 | 1.736384034 | up   |
| E330018D03Rik | 0.003076962 | 1.631248593 | up   |
| Tsc22d4       | 0.003081192 | 1.689806819 | up   |
| LOC100044170  | 0.003082999 | 2.01610589  | down |
| Rbm19         | 0.003083176 | 1.841170669 | up   |
| Mfsd7a        | 0.003091416 | 1.598809719 | up   |
| Slc39a8       | 0.003093493 | 1.50484395  | down |
| 2410001C21Rik | 0.003093862 | 1.814378738 | up   |
| Ascc3         | 0.003098829 | 1.935636044 | down |
| LOC100046825  | 0.003102969 | 1.992267132 | up   |
| Serinc4       | 0.003104531 | 1.765221    | up   |
| Ndufa8        | 0.003104565 | 1.663775682 | down |
| 2900010M23Rik | 0.00310725  | 1.78678298  | down |
| 3202002H23Rik | 0.003109176 | 2.037961483 | down |
| Rab5c         | 0.003109176 | 1.578192949 | up   |
| Rhoa          | 0.0031095   | 1.559029698 | up   |
| Tasp1         | 0.003111075 | 1.752894998 | down |
| C230094A19Rik | 0.003117175 | 1.979426384 | down |
| Igsf6         | 0.003120444 | 1.535048485 | up   |
| Agpat2        | 0.003122466 | 1.915247798 | down |
| Asf1b         | 0.003125316 | 1.900204778 | down |
| Ssca1         | 0.00312981  | 1.511388063 | up   |
| A530064K17Rik | 0.003129953 | 1.564487696 | up   |
| LOC668837     | 0.003135693 | 2.497492075 | up   |
| LOC674195     | 0.003135693 | 1.66988349  | up   |
| Lin7a         | 0.003142472 | 1.767274857 | down |
| Snrk          | 0.00314481  | 1.829528213 | down |
| LOC100038993  | 0.003145736 | 2.192788839 | down |
| Ccnd1         | 0.003149318 | 1.749664187 | down |
| 0610009O20Rik | 0.003151571 | 1.54002142  | up   |
| Gadd45gip1    | 0.003151571 | 1.674926162 | up   |
| B230312A22Rik | 0.003156103 | 1.860005021 | up   |
| LOC665386     | 0.003156103 | 2.90452981  | down |
| 3300002A11Rik | 0.003159965 | 1.582831383 | up   |
| Pou3f3        | 0.003161661 | 1.736479521 | down |
| Clcn3         | 0.003162251 | 1.793439388 | up   |
| Tssc1         | 0.003166017 | 1.825648665 | down |
| 1200009F10Rik | 0.003168092 | 1.541766286 | up   |
| Gpr89         | 0.00317024  | 1.547614813 | up   |
| Th1l          | 0.003172688 | 1.537360549 | up   |
| LOC100045737  | 0.003174888 | 1.721607089 | down |
| Pigp          | 0.003176411 | 1.88066709  | down |
| Anapc2        | 0.00317806  | 1.506613612 | up   |
| Phrf1         | 0.00317806  | 1.806850314 | up   |
| Tgm2          | 0.003179314 | 1.988940001 | down |
| LOC100044059  | 0.003189047 | 1.543218732 | down |

|                        |             |             |      |
|------------------------|-------------|-------------|------|
| Slc35a3                | 0.003195917 | 1.9222188   | down |
| 2700069118Rik          | 0.003204139 | 2.096599817 | down |
| Cnot10                 | 0.003204139 | 1.703911781 | up   |
| E130112E08Rik          | 0.003209221 | 2.25476861  | up   |
| Igfbp4                 | 0.003218223 | 1.883373022 | up   |
| LOC381808              | 0.003220218 | 1.581240773 | down |
| Nup62                  | 0.0032256   | 1.546081662 | up   |
| Sec61b                 | 0.003229256 | 1.893554211 | down |
| Map2k5                 | 0.003229405 | 1.592213869 | up   |
| Inpp5k                 | 0.003233563 | 1.736221194 | up   |
| A630042L21Rik          | 0.003240851 | 1.652383089 | up   |
| Sqrdl                  | 0.003242426 | 1.655393481 | up   |
| D16Bwg1543e            | 0.003246188 | 1.532209992 | up   |
| Mobk1b                 | 0.003246188 | 1.725683808 | down |
| Galnt11                | 0.003246403 | 1.576024771 | down |
| Nudcd1                 | 0.003246403 | 1.789779425 | up   |
| Taf7l                  | 0.003246403 | 1.70212853  | up   |
| Galnt1                 | 0.003247299 | 1.853106022 | down |
| Lphn3                  | 0.003251161 | 1.831612229 | down |
| Zfp13                  | 0.003255191 | 1.69451499  | up   |
| Tyk2                   | 0.003257957 | 1.530283332 | up   |
| Ccnc                   | 0.003260711 | 1.893324256 | down |
| Pkn3                   | 0.003262583 | 1.941288948 | up   |
| D130076G13Rik          | 0.003275933 | 1.599083543 | up   |
| Sdf2l1                 | 0.003283825 | 1.867284298 | down |
| Nssr                   | 0.003286162 | 2.351471186 | up   |
| scl000032.1_60_REVCOMP | 0.003295364 | 1.78570807  | down |
| Faim                   | 0.003298329 | 2.021032572 | down |
| Fam171a2               | 0.003298804 | 1.624395967 | up   |
| Tlr7                   | 0.003299046 | 2.234384537 | up   |
| A230056P14Rik          | 0.003308681 | 1.557416081 | down |
| Pramel4                | 0.00330894  | 1.828261614 | up   |
| Spata5l1               | 0.003309147 | 2.046791792 | down |
| Ccnc                   | 0.00331095  | 2.818184137 | down |
| Zfp692                 | 0.003317443 | 1.805917025 | up   |
| Traf4                  | 0.003317867 | 1.84571135  | down |
| Atp6v1a                | 0.003325462 | 1.781631231 | down |
| Samhd1                 | 0.003332507 | 1.643926978 | up   |
| Fancc                  | 0.00333276  | 1.544645429 | up   |
| Gli2                   | 0.003332995 | 1.640829682 | down |
| Kras                   | 0.003338463 | 1.503148794 | up   |
| Rabif                  | 0.003357563 | 1.59619689  | down |
| Tmem85                 | 0.003357563 | 1.539951801 | down |
| Homer1                 | 0.003358704 | 1.683333278 | down |
| 9430015G10Rik          | 0.003360189 | 1.584702492 | down |
| LOC382972              | 0.003360856 | 1.65523243  | up   |
| 6720427H10Rik          | 0.00336579  | 2.302752972 | up   |
| Atf3                   | 0.003377152 | 1.884488821 | down |
| Mrps34                 | 0.003378016 | 1.93731761  | up   |
| Hmgcs2                 | 0.003378565 | 1.805868745 | down |
| Flcn                   | 0.003381534 | 1.822847724 | down |
| 4833408D11Rik          | 0.003387055 | 1.761781454 | up   |

|                |             |             |      |
|----------------|-------------|-------------|------|
| Ctage5         | 0.003387557 | 2.645906925 | down |
| G6pc3          | 0.003387557 | 1.757308245 | down |
| Top2a          | 0.003388263 | 1.654109836 | up   |
| 2310075M15Rik  | 0.003395082 | 1.735389829 | up   |
| Pcmttd1        | 0.003398648 | 1.791262388 | down |
| Mbtps2         | 0.003399971 | 1.629961491 | down |
| Sft2d3         | 0.003402125 | 1.729820132 | up   |
| Als2cr13       | 0.0034025   | 2.424989462 | down |
| B230208H17Rik  | 0.003403729 | 1.922761679 | up   |
| Slc2a8         | 0.003404644 | 1.66996932  | up   |
| scl000683.1_16 | 0.003409373 | 1.674127221 | down |
| Rffl           | 0.003423323 | 1.611961484 | down |
| Tuba1a         | 0.003432405 | 2.484294176 | up   |
| 6430706H07Rik  | 0.003439797 | 1.631825447 | up   |
| Gmfb           | 0.003448722 | 1.635286093 | up   |
| Gas2           | 0.003450006 | 2.430493116 | up   |
| Efnb2          | 0.003451626 | 2.006764174 | up   |
| Mylc2b         | 0.003451626 | 2.431245089 | down |
| Cbln1          | 0.003453856 | 2.384750605 | up   |
| E430025E21Rik  | 0.003470202 | 1.801285029 | up   |
| Chchd3         | 0.003471229 | 1.601028681 | up   |
| Fras1          | 0.003471311 | 2.030468226 | up   |
| Arhgap18       | 0.003473257 | 1.810097933 | up   |
| EG625514       | 0.003473298 | 1.849829316 | up   |
| Hmmr           | 0.003481232 | 1.599424243 | down |
| Crk            | 0.003492635 | 1.565510154 | up   |
| Dkk3           | 0.003493833 | 1.85215342  | down |
| LOC100047273   | 0.003507102 | 1.582581997 | up   |
| Chkb           | 0.003508322 | 1.602087975 | up   |
| Phka1          | 0.003508322 | 1.814004064 | down |
| Mrps31         | 0.003514801 | 1.877963662 | down |
| Adam33         | 0.003516111 | 1.6104846   | up   |
| Trappc6b       | 0.003516111 | 2.610994101 | down |
| D5Ertd689e     | 0.003519163 | 2.334233284 | up   |
| B230326O19Rik  | 0.003522195 | 1.611258864 | up   |
| BC008163       | 0.003524642 | 1.663258314 | down |
| Gls            | 0.003533307 | 3.115065575 | down |
| LOC100042074   | 0.003534356 | 1.642328501 | up   |
| Usp46          | 0.003535178 | 2.19336009  | down |
| 1810009A15Rik  | 0.003536369 | 1.642547131 | down |
| C030048B08Rik  | 0.003544892 | 1.677407146 | down |
| Matk           | 0.003546746 | 1.506923318 | up   |
| Syncrip        | 0.003556234 | 1.894646764 | down |
| A730069N07Rik  | 0.003561068 | 2.787984133 | up   |
| Rdm1           | 0.003565355 | 1.704985976 | up   |
| 2600010L24Rik  | 0.003571567 | 3.224089861 | up   |
| Ehmt1          | 0.003572499 | 1.750568152 | down |
| Arhgap20       | 0.003595054 | 1.637039781 | down |
| C230058N13Rik  | 0.00360525  | 1.530951381 | down |
| Pms1           | 0.003605627 | 1.542927265 | up   |
| Scap           | 0.003607507 | 1.572818518 | up   |
| Gadd45a        | 0.003609364 | 1.737415195 | down |

|                    |             |             |      |
|--------------------|-------------|-------------|------|
| ldb2               | 0.003614169 | 2.314078808 | down |
| D230014K01Rik      | 0.003616988 | 1.726168275 | up   |
| LOC100047419       | 0.003616988 | 1.821757913 | up   |
| Ahcyl2             | 0.003619385 | 1.82755959  | down |
| 1810056I18Rik      | 0.00361984  | 1.657168865 | up   |
| Ppp4r1             | 0.003621267 | 2.129499674 | down |
| Pomt2              | 0.003625459 | 1.540677428 | up   |
| Ube3a              | 0.003626595 | 1.832949758 | down |
| 0610009J05Rik      | 0.003626915 | 2.230975151 | up   |
| AF251705           | 0.003628265 | 1.610610485 | up   |
| Rtkn               | 0.003628265 | 1.949686885 | down |
| Rarg               | 0.003631985 | 1.786343336 | down |
| Stim1              | 0.003635292 | 1.953275561 | up   |
| 5133401N09Rik      | 0.003642849 | 1.737028003 | up   |
| B230315N10Rik      | 0.003642966 | 1.694989801 | up   |
| Polr2d             | 0.0036439   | 1.926323533 | down |
| Slu7               | 0.003655493 | 1.624868631 | down |
| Spata7             | 0.003658188 | 1.78457284  | down |
| Eif2c2             | 0.003668853 | 2.184803963 | up   |
| Armc7              | 0.003670684 | 1.605438232 | up   |
| Tbc1d9             | 0.003670884 | 1.64367342  | down |
| Arid4b             | 0.003670922 | 1.777226567 | up   |
| Dock10             | 0.00367329  | 1.666438103 | down |
| 5730414M22Rik      | 0.00367604  | 1.664072633 | up   |
| Osr1               | 0.003682738 | 2.1889112   | up   |
| Cnot4              | 0.003683566 | 1.604010463 | up   |
| 5830472F04Rik      | 0.003684557 | 1.51057303  | up   |
| Trappc2l           | 0.003691504 | 1.767647147 | up   |
| Pla2g4b            | 0.003701275 | 1.545077562 | up   |
| Ssh3               | 0.003703141 | 1.593223453 | up   |
| Dus2l              | 0.00371027  | 1.524039984 | up   |
| LOC632454          | 0.003716338 | 2.542020559 | down |
| Scrn1              | 0.003717026 | 1.52770114  | down |
| Was                | 0.003717987 | 3.320369482 | up   |
| Lmbr1l             | 0.003720194 | 1.618604183 | up   |
| Spag5              | 0.003724968 | 1.507095933 | down |
| Tlr13              | 0.00372603  | 1.988589168 | up   |
| Rpa2               | 0.003730835 | 2.399958134 | down |
| BC023892           | 0.003735123 | 2.652648926 | down |
| Prdx2              | 0.003738394 | 1.878647685 | up   |
| Scly               | 0.003738394 | 1.559446216 | up   |
| C77604             | 0.003739046 | 1.888645768 | up   |
| Col25a1            | 0.003739326 | 1.931287408 | down |
| Col8a1             | 0.00373976  | 2.177601099 | up   |
| LOC100044766       | 0.003741058 | 1.541253686 | down |
| Cad                | 0.003742848 | 1.964092374 | up   |
| ENSMUSG00000043795 | 0.003742848 | 2.344728231 | up   |
| 2610019N19Rik      | 0.003743986 | 2.018415451 | up   |
| Dync1i2            | 0.003748593 | 2.300271273 | down |
| 0610025P10Rik      | 0.003752044 | 2.05112958  | up   |
| Gp49a              | 0.003752044 | 1.830824614 | up   |
| Prps2              | 0.003754008 | 1.518619895 | up   |

|                  |             |             |      |
|------------------|-------------|-------------|------|
| Six2             | 0.003772785 | 2.700210095 | down |
| Lancl1           | 0.003775121 | 1.873844385 | up   |
| Camk2d           | 0.003790436 | 1.692703247 | down |
| Wdfy2            | 0.003791419 | 2.05040741  | up   |
| 3230401L03Rik    | 0.003792494 | 2.112091541 | up   |
| Sumf2            | 0.003805012 | 1.765727282 | down |
| 4931406C07Rik    | 0.003810988 | 1.631590962 | up   |
| Baz1a            | 0.003810988 | 1.765205741 | down |
| Gdap9            | 0.003817382 | 1.719667316 | up   |
| Slc25a4          | 0.003818135 | 2.12780714  | up   |
| Mknk1            | 0.003822201 | 1.511101246 | up   |
| Gin1             | 0.003823536 | 1.599875689 | down |
| Gnaq             | 0.003823536 | 1.843773246 | down |
| Adam12           | 0.003837272 | 1.832150936 | down |
| Sephs2           | 0.003840852 | 1.651383042 | down |
| Wbscr22          | 0.003841751 | 1.866551638 | down |
| Nde1             | 0.003845731 | 1.664103627 | down |
| Mtap7d2          | 0.003850864 | 1.639999032 | down |
| G630024G08Rik    | 0.003857253 | 1.723655582 | up   |
| Scamp1           | 0.003857253 | 1.853427053 | down |
| Cdyl             | 0.003861351 | 2.133082867 | down |
| Rab38            | 0.003870166 | 1.534332275 | down |
| B930053N05Rik    | 0.003880965 | 1.890425682 | up   |
| Lmtk2            | 0.003883419 | 1.658643127 | up   |
| Ftsj3            | 0.003884982 | 1.698146701 | up   |
| Tnrc6a           | 0.003884982 | 1.597840071 | up   |
| Nedl2            | 0.003889202 | 1.502337217 | up   |
| scl0002975.1_346 | 0.003889489 | 1.894325256 | up   |
| Cdadcl1          | 0.003889907 | 1.581121564 | down |
| Syde2            | 0.003889907 | 1.605773211 | down |
| E330033B04Rik    | 0.003895376 | 1.597389221 | up   |
| A630018P17Rik    | 0.003897273 | 1.58425498  | down |
| Top1mt           | 0.003897288 | 1.543007493 | up   |
| C030044O21Rik    | 0.003897868 | 1.944759607 | up   |
| Nufip2           | 0.003900053 | 1.756588578 | up   |
| Fcgr1            | 0.00391657  | 1.774687767 | up   |
| Cacng7           | 0.003917256 | 1.570699692 | down |
| 9030417F11Rik    | 0.003921093 | 1.957041144 | up   |
| Gsk3b            | 0.003928651 | 2.003126621 | up   |
| Atp2a3           | 0.003937052 | 2.465842247 | up   |
| Rac3             | 0.003939823 | 1.596728802 | down |
| Myh9             | 0.003945643 | 1.610285163 | up   |
| Zfp709           | 0.003953994 | 1.969297528 | up   |
| 2210010B09Rik    | 0.003959118 | 1.505251527 | down |
| 4930500L23Rik    | 0.003966129 | 1.663146734 | up   |
| Tmem14c          | 0.003966129 | 2.00219965  | down |
| Mt1              | 0.003977035 | 3.477302551 | up   |
| Cog2             | 0.003977235 | 1.681783676 | up   |
| Lims1            | 0.003984598 | 2.157703638 | up   |
| 2700081O15Rik    | 0.003993027 | 1.916437268 | up   |
| 9430085L16Rik    | 0.003993027 | 2.265917778 | up   |
| LOC385917        | 0.003993027 | 1.545158267 | up   |



|                 |             |             |      |
|-----------------|-------------|-------------|------|
| Phf2            | 0.003993027 | 1.750092745 | up   |
| Cyb5b           | 0.003997692 | 1.975117445 | up   |
| Kif26b          | 0.004011465 | 1.922086239 | down |
| Ppp3r1          | 0.004016906 | 1.757629156 | up   |
| LOC245676       | 0.004021084 | 1.651540637 | up   |
| Nrp2            | 0.004025776 | 1.683444738 | down |
| Gimap6          | 0.004028302 | 1.717622161 | up   |
| 2010005J08Rik   | 0.004041011 | 1.626974702 | up   |
| Tk2             | 0.004043707 | 1.934167385 | up   |
| Olfml3          | 0.004054398 | 1.811375737 | up   |
| scl0001912.1_11 | 0.004054634 | 2.468482018 | down |
| Hint1           | 0.004056152 | 1.908129334 | down |
| Tpd52l1         | 0.004058182 | 2.081928015 | down |
| Capn7           | 0.004077544 | 2.686601162 | down |
| Cog6            | 0.004077859 | 1.77967155  | down |
| 8030462N17Rik   | 0.004082752 | 1.581686139 | down |
| Sgtb            | 0.004083979 | 1.82006669  | down |
| 1110025M09Rik   | 0.004086502 | 1.628869534 | up   |
| Tnmd            | 0.004092014 | 2.280372143 | down |
| LOC100047339    | 0.004092972 | 1.777156591 | up   |
| Pcdha7          | 0.004092972 | 1.730584621 | up   |
| Car3            | 0.0040933   | 1.769499302 | down |
| Akap8           | 0.00409555  | 2.021672249 | up   |
| Gna15           | 0.00409555  | 1.639328718 | up   |
| E330027P06Rik   | 0.004101725 | 1.536995292 | up   |
| 6330419J24Rik   | 0.004101737 | 1.510502219 | down |
| 6530406A20Rik   | 0.004101737 | 1.60353291  | up   |
| LOC100046608    | 0.004104266 | 1.772329927 | down |
| LOC100048436    | 0.004104764 | 1.846209168 | down |
| Gata2           | 0.004106316 | 2.113579989 | down |
| Etv5            | 0.004108627 | 1.707441449 | down |
| 1700074L02Rik   | 0.004112186 | 1.500760675 | up   |
| Cdk2            | 0.004112186 | 1.78936398  | down |
| Arih1           | 0.004125446 | 2.044676065 | up   |
| Trpc2           | 0.004131077 | 1.676445723 | up   |
| Dnajc15         | 0.004141653 | 1.558027268 | up   |
| E130303B06Rik   | 0.004141653 | 1.669071436 | up   |
| Grf1            | 0.004148846 | 1.78775537  | up   |
| Prdm4           | 0.004149471 | 1.87024951  | down |
| A530020A01Rik   | 0.004153241 | 1.565151215 | up   |
| Gpiap1          | 0.004153773 | 1.73138237  | up   |
| LOC329506       | 0.004161408 | 1.698061347 | down |
| Dgkz            | 0.004162489 | 1.824741364 | up   |
| Hook3           | 0.004164313 | 2.14341569  | up   |
| Ccdc19          | 0.004167607 | 1.656460881 | up   |
| E030049G20Rik   | 0.004169922 | 1.982677817 | down |
| EG633570        | 0.004177476 | 1.793519974 | up   |
| Rtn3            | 0.004177476 | 1.636004448 | down |
| Zxdc            | 0.004179012 | 1.786723375 | down |
| Fbxl20          | 0.004180364 | 1.65792346  | up   |
| Wnt11           | 0.004180364 | 1.609444022 | up   |
| Eml3            | 0.004191109 | 1.538709998 | up   |

|                |             |             |      |
|----------------|-------------|-------------|------|
| Fuz            | 0.004195858 | 1.568669081 | down |
| Mkrn1          | 0.004195963 | 2.301561832 | up   |
| Gstm7          | 0.004196266 | 2.020983934 | down |
| Ino80          | 0.004196266 | 1.660962105 | up   |
| Sema4g         | 0.004196266 | 2.031868696 | up   |
| Clock          | 0.004198104 | 1.949470282 | down |
| Lrch1          | 0.004199246 | 1.604456425 | down |
| Med7           | 0.004224315 | 1.720327735 | down |
| LOC671523      | 0.004225403 | 1.978464365 | up   |
| Nono           | 0.004240745 | 2.056122541 | up   |
| Srrm1          | 0.004250319 | 1.615817308 | up   |
| Gm2a           | 0.004263536 | 1.636600494 | up   |
| Glipr1         | 0.004264311 | 2.391495943 | up   |
| Lrp1b          | 0.004283449 | 1.663841486 | up   |
| LOC381546      | 0.00428382  | 1.672085404 | up   |
| 2810409M01Rik  | 0.004286827 | 1.734881401 | up   |
| Isoc1          | 0.004294823 | 1.630795598 | down |
| EG245297       | 0.004297348 | 2.63060832  | down |
| Kcnab2         | 0.00429767  | 1.53936851  | up   |
| LOC100039514   | 0.004303507 | 1.510446429 | up   |
| Fv1            | 0.004326617 | 1.651861072 | down |
| Prickle1       | 0.004326617 | 3.681575537 | down |
| Supt6h         | 0.004326617 | 1.528852344 | up   |
| D330008I21Rik  | 0.004336954 | 1.646365404 | up   |
| Ccdc12         | 0.004345907 | 1.749685407 | up   |
| Bxdc5          | 0.004347988 | 1.857530832 | down |
| Elovl6         | 0.004349256 | 1.853826523 | up   |
| Slc14a1        | 0.004349256 | 1.719521284 | down |
| Tnnt1          | 0.004349305 | 1.736913204 | up   |
| Ankrd41        | 0.004356569 | 1.790842533 | up   |
| Brpf1          | 0.004359727 | 1.641768813 | up   |
| Gng10          | 0.004382062 | 1.805803299 | down |
| Lphn3          | 0.004382062 | 1.745946884 | down |
| Zc3hc1         | 0.004388328 | 1.506136537 | down |
| Stxbp3         | 0.004388961 | 1.62592721  | up   |
| Alg10b         | 0.004398928 | 1.51011014  | down |
| D230019K20Rik  | 0.004399319 | 1.542418957 | up   |
| Aco2           | 0.004403157 | 1.508116126 | up   |
| Raly           | 0.004403343 | 2.511213303 | down |
| LOC100040897   | 0.004409718 | 1.941003323 | up   |
| Akap13         | 0.004415554 | 1.573993444 | up   |
| Osbpl5         | 0.00442063  | 1.530594945 | up   |
| scl0002547.1_9 | 0.004421886 | 1.663756013 | down |
| D330035D07Rik  | 0.004421991 | 1.865784168 | up   |
| Gpr153         | 0.004452377 | 1.725471854 | up   |
| Alg8           | 0.004458599 | 2.290554285 | down |
| Sar1b          | 0.004464801 | 2.015235186 | down |
| Fermt3         | 0.004465505 | 2.080588341 | up   |
| Snrpd1         | 0.004472939 | 2.621015787 | down |
| Gnas           | 0.00447796  | 1.52675271  | down |
| Ptprd          | 0.00447796  | 1.835583448 | up   |
| Tug1           | 0.00447796  | 2.31597209  | down |

|                  |             |             |      |
|------------------|-------------|-------------|------|
| Wwtr1            | 0.004482235 | 1.507518649 | down |
| Ngfr             | 0.004483726 | 2.637902737 | up   |
| 9530014D17Rik    | 0.004487468 | 2.243878365 | up   |
| D230032H14Rik    | 0.004491247 | 1.522387147 | up   |
| Slc26a6          | 0.004506724 | 1.759891391 | up   |
| Erich1           | 0.004510757 | 1.613199472 | up   |
| Sumo1            | 0.004514331 | 2.395817041 | down |
| Lat              | 0.004519082 | 1.69903791  | up   |
| Paip2            | 0.004524263 | 1.548714042 | up   |
| Ugt1a10          | 0.004525196 | 1.916568518 | up   |
| 2610019E17Rik    | 0.004544528 | 1.589625716 | down |
| LOC100048721     | 0.004544528 | 1.810512781 | down |
| AI316807         | 0.004551012 | 1.565317392 | up   |
| Hoxb9            | 0.00455276  | 2.278700352 | up   |
| Bmp1             | 0.004553463 | 1.86990571  | up   |
| Anxa6            | 0.004558347 | 1.601871729 | up   |
| mtDNA_ND5        | 0.004561616 | 2.46696043  | down |
| Sgsm2            | 0.004561616 | 1.837571859 | up   |
| Wdr8             | 0.004562427 | 1.753470659 | down |
| Asph             | 0.004563694 | 1.963395834 | down |
| Neu1             | 0.004565391 | 1.840516925 | up   |
| 2210410D02Rik    | 0.004565694 | 1.851871014 | down |
| Tll12            | 0.004568313 | 1.524618149 | up   |
| Slc46a1          | 0.00456836  | 1.540046215 | up   |
| Tmem60           | 0.004575928 | 2.360965729 | down |
| Lmnb1            | 0.004585581 | 6.803228855 | down |
| Lrfn4            | 0.004586404 | 1.824934244 | up   |
| C530001D20Rik    | 0.004591937 | 1.573381424 | down |
| Ndufb10          | 0.004591937 | 1.756159306 | up   |
| Dbn1             | 0.004604195 | 1.925771713 | up   |
| Hsd17b11         | 0.004607201 | 3.419238806 | down |
| EG632248         | 0.004609945 | 4.16443634  | down |
| Adamts8          | 0.004615928 | 1.504394054 | up   |
| Mbtps2           | 0.004616031 | 1.571812153 | down |
| Zswim6           | 0.004623151 | 2.522022486 | down |
| Ercc5            | 0.00462606  | 1.680451274 | down |
| Ctsb             | 0.00463177  | 1.987621546 | up   |
| B230337C21Rik    | 0.004631903 | 2.546240091 | up   |
| A730029I18Rik    | 0.004631994 | 1.655958653 | up   |
| Rhbdd2           | 0.004631994 | 1.896586418 | up   |
| scl0001602.1_506 | 0.004631994 | 2.063677549 | down |
| Lsm14b           | 0.004633517 | 3.277315378 | down |
| Cbx6             | 0.004648326 | 1.631685615 | up   |
| Jup              | 0.004648326 | 1.872483373 | up   |
| Dlx5             | 0.004652189 | 1.559503198 | down |
| Ctsk             | 0.004652794 | 1.602247715 | down |
| Rexo1            | 0.004652794 | 1.53508544  | up   |
| Foxred1          | 0.004653975 | 1.834370732 | down |
| D15Ert528e       | 0.004654621 | 1.527486801 | up   |
| Ppm1l            | 0.004674154 | 1.582718134 | up   |
| Rcsd1            | 0.004674154 | 1.788772225 | up   |
| scl0003996.1_126 | 0.004691938 | 1.658458948 | down |

|               |             |             |      |
|---------------|-------------|-------------|------|
| Al875142      | 0.004707248 | 1.615317106 | up   |
| LOC545487     | 0.004707248 | 1.776695013 | up   |
| Bcl2l1        | 0.004709305 | 1.546980739 | down |
| Zbtb7a        | 0.004711114 | 1.884957552 | up   |
| Impdh1        | 0.004718251 | 1.510647774 | down |
| Nsbp1         | 0.004719961 | 3.795404673 | down |
| Nudt4         | 0.004723395 | 2.079841614 | down |
| Rnasen        | 0.004726149 | 2.084136725 | up   |
| 1110046J11Rik | 0.004740237 | 1.934075236 | up   |
| Nptn          | 0.004741892 | 2.036044359 | up   |
| Ggta1         | 0.004747286 | 1.871118188 | up   |
| C80913        | 0.004748617 | 1.696633697 | down |
| Rnf170        | 0.004752605 | 1.632795811 | down |
| 6030458C11Rik | 0.00476515  | 2.004194737 | up   |
| Scyl1bp1      | 0.004767763 | 1.622684956 | down |
| 2310022K11Rik | 0.004777185 | 1.69041431  | down |
| Ephb2         | 0.004777502 | 1.536585331 | down |
| D230023E14Rik | 0.004783107 | 1.550012827 | up   |
| Edf1          | 0.004790453 | 1.567381144 | up   |
| Lrrc14        | 0.004790453 | 1.656934977 | up   |
| Fmnl2         | 0.004807578 | 2.74194026  | down |
| HPBRII4       | 0.004817992 | 2.928853989 | up   |
| 2510022D24Rik | 0.004824178 | 2.407793284 | down |
| 6430511F03    | 0.004827902 | 1.602097392 | up   |
| Polr3f        | 0.004831156 | 1.607256055 | down |
| 5430433G21Rik | 0.004840155 | 2.294437885 | down |
| 5830411J07Rik | 0.004840155 | 1.540522099 | up   |
| Ict1          | 0.004840155 | 1.980940938 | up   |
| Dpp9          | 0.004868642 | 1.800584674 | up   |
| Naglu         | 0.004868642 | 1.592426539 | up   |
| Gtf3c4        | 0.004869718 | 2.05004859  | down |
| Rnf14         | 0.004875743 | 1.554387689 | down |
| 5630401D24Rik | 0.004882396 | 1.529340267 | down |
| Car15         | 0.00488762  | 1.580145598 | up   |
| 2810405K02Rik | 0.004890215 | 1.519294739 | up   |
| D12Erttd647e  | 0.004890215 | 1.83235085  | up   |
| Alg9          | 0.004895086 | 1.56601882  | down |
| Tmem192       | 0.004896346 | 1.616845727 | up   |
| Alg8          | 0.004903709 | 1.755251885 | down |
| Ankhd1        | 0.004907392 | 1.838685513 | up   |
| 4930402E16Rik | 0.004910303 | 1.959052205 | up   |
| Flnc          | 0.00491357  | 2.133637667 | up   |
| Chst8         | 0.004914698 | 1.671821713 | up   |
| Asph          | 0.004919082 | 1.98672688  | down |
| Frzb          | 0.004926147 | 1.579760313 | up   |
| LOC100046467  | 0.004935826 | 1.92604661  | up   |
| 4833428M15Rik | 0.004943388 | 1.650403261 | up   |
| A930014D08Rik | 0.004943388 | 1.985752583 | up   |
| E330024P20Rik | 0.004943388 | 1.625862241 | up   |
| Cdh13         | 0.00495666  | 1.615247726 | up   |
| EG665646      | 0.004964224 | 2.124993324 | down |
| D030064C08Rik | 0.00496564  | 1.701019168 | up   |

|               |             |             |      |
|---------------|-------------|-------------|------|
| C030010B13Rik | 0.004970646 | 1.57362318  | up   |
| D230035M11Rik | 0.004972111 | 1.536402702 | up   |
| Rhobtb3       | 0.004974162 | 1.504313469 | down |
| Peo1          | 0.004979413 | 1.660571098 | down |
| Cyp27a1       | 0.004982191 | 1.676168323 | up   |
| Sgol1         | 0.004995079 | 1.553628326 | up   |
| Mical1        | 0.005010033 | 1.592559576 | up   |
| 2510047L19Rik | 0.005012261 | 1.510557771 | down |
| Axl           | 0.0050198   | 1.648225427 | up   |
| Slc9a8        | 0.005031459 | 1.734564304 | up   |
| Ccnt1         | 0.005037142 | 1.690817475 | up   |
| Cenpt         | 0.005037142 | 1.8164258   | up   |
| Cars2         | 0.005040272 | 1.561414003 | up   |
| Lrrc16b       | 0.005049709 | 2.217592478 | up   |
| Mcts1         | 0.005049709 | 1.609264493 | down |
| Grik5         | 0.005062176 | 1.657815695 | up   |
| 2410018L13Rik | 0.00506219  | 2.196941376 | down |
| Hprt1         | 0.005075932 | 1.948389411 | down |
| Cse1l         | 0.005080655 | 1.519023299 | down |
| LOC331507     | 0.00509244  | 2.226765871 | down |
| Npepl1        | 0.005100557 | 1.711185455 | up   |
| A030007L17Rik | 0.005107491 | 1.544584394 | down |
| Epha4         | 0.005107491 | 1.665304303 | up   |
| Rab28         | 0.005108263 | 1.852225065 | down |
| Yipf5         | 0.005108263 | 1.63463676  | up   |
| Fam171a1      | 0.005114235 | 1.51014781  | up   |
| Hdac7         | 0.005132957 | 2.353862286 | up   |
| LOC100046401  | 0.005137407 | 1.946298957 | up   |
| Arhgef1       | 0.005138093 | 1.593886375 | up   |
| LOC268569     | 0.005141006 | 2.831551552 | down |
| Nfu1          | 0.005141006 | 1.652709723 | up   |
| Gphn          | 0.005141355 | 1.870468378 | up   |
| Eef1e1        | 0.005146779 | 2.135507345 | down |
| Asb7          | 0.005150687 | 1.532820225 | down |
| 1700034P14Rik | 0.00516316  | 1.519303322 | down |
| Bbox1         | 0.005170662 | 1.536293984 | down |
| Igsf11        | 0.005177238 | 1.629356027 | down |
| 2810417K24Rik | 0.005183023 | 2.255563021 | down |
| C130074O09Rik | 0.005186057 | 1.897568703 | up   |
| 3110082D06Rik | 0.005186502 | 1.806535721 | up   |
| Zic4          | 0.00519353  | 1.863726735 | up   |
| Acpl2         | 0.005205416 | 1.52359724  | down |
| Fam122b       | 0.005219139 | 1.527989864 | down |
| Adamtsl2      | 0.005224925 | 1.906339645 | up   |
| Cpne1         | 0.005230845 | 2.397340059 | up   |
| D530037H12Rik | 0.005237694 | 1.93134892  | up   |
| Trappc6b      | 0.005238731 | 2.099305868 | down |
| LOC626259     | 0.005245532 | 1.688784957 | up   |
| Tfip11        | 0.005251227 | 1.77641964  | up   |
| Blvra         | 0.005261303 | 1.72979033  | up   |
| A230057M07Rik | 0.005264175 | 1.823416829 | up   |
| Bbs10         | 0.005265005 | 1.563109994 | down |

|               |             |             |      |
|---------------|-------------|-------------|------|
| LOC100048372  | 0.0052724   | 1.545868874 | up   |
| 6720422M22Rik | 0.005276729 | 2.376379252 | up   |
| Atp5a1        | 0.005293693 | 1.523203969 | up   |
| D14Ert436e    | 0.005303757 | 1.558619976 | up   |
| Rab14         | 0.005303757 | 2.007956743 | down |
| Hprt1         | 0.005306407 | 1.744814515 | down |
| B930032P17Rik | 0.005307295 | 1.644609213 | up   |
| 1700020I14Rik | 0.005308216 | 1.623444915 | down |
| Traf2         | 0.005316884 | 1.579707861 | down |
| Ssbp1         | 0.005324197 | 1.722686291 | up   |
| A130021K16Rik | 0.005330659 | 1.829400778 | up   |
| Amigo1        | 0.005336412 | 1.659139276 | up   |
| LOC194905     | 0.005356513 | 1.711860538 | up   |
| C79267        | 0.005357334 | 2.197933912 | up   |
| LOC386112     | 0.005363497 | 2.618575096 | up   |
| LOC100040182  | 0.005370474 | 2.000064373 | up   |
| Cntfr         | 0.005375562 | 1.530892491 | down |
| Nadsyn1       | 0.00537588  | 1.519453049 | down |
| 9430020M11Rik | 0.00538238  | 1.60305202  | up   |
| Mtssk         | 0.00538238  | 1.718600035 | up   |
| Hsd17b11      | 0.005383089 | 2.970896244 | down |
| Zbtb12        | 0.005383089 | 1.870143294 | down |
| Rnase4        | 0.005383271 | 1.609344482 | up   |
| 9530048I18Rik | 0.005386025 | 1.995976567 | up   |
| Phf12         | 0.005388652 | 1.701747537 | up   |
| Tank          | 0.00540736  | 2.19803071  | down |
| Usp13         | 0.005408874 | 1.531322122 | up   |
| 6030455K13Rik | 0.005427571 | 1.761798143 | up   |
| Xkr5          | 0.005438238 | 1.539257407 | up   |
| Slmap         | 0.005438376 | 1.660367608 | down |
| Tmem86a       | 0.005438531 | 1.728254199 | up   |
| Cd44          | 0.005446337 | 2.069503546 | up   |
| 5330401F18Rik | 0.005458402 | 1.827988505 | up   |
| BC003993      | 0.005466017 | 1.627212644 | down |
| Ubfd1         | 0.00547539  | 1.661820293 | up   |
| 9530010C24Rik | 0.005478845 | 3.003012419 | up   |
| Fndc5         | 0.00547886  | 1.599969387 | up   |
| LOC547150     | 0.005492091 | 1.893796086 | up   |
| Senp1         | 0.005493636 | 1.832995772 | up   |
| Lpl           | 0.005504496 | 2.378626585 | up   |
| 6030422A11Rik | 0.005504545 | 1.707243204 | up   |
| Zfp319        | 0.005504545 | 1.673882365 | up   |
| 6820437F20Rik | 0.005507312 | 2.888751984 | up   |
| 2310047O13Rik | 0.005510776 | 1.553020954 | down |
| Gpr137b-ps    | 0.005512436 | 1.671805501 | up   |
| 2210401K01Rik | 0.005512649 | 2.492856503 | up   |
| Spg7          | 0.005519371 | 1.590421319 | up   |
| Bmp4          | 0.005522695 | 1.95533061  | down |
| Casp2         | 0.005523855 | 1.78456223  | up   |
| C430014K11Rik | 0.005543066 | 1.709342122 | up   |
| 5530401D11Rik | 0.005547452 | 1.576612711 | up   |
| 6720482D04    | 0.005550433 | 1.572695851 | up   |

|                  |             |             |      |
|------------------|-------------|-------------|------|
| lhpk1            | 0.005550883 | 2.123453856 | up   |
| 3830612M24       | 0.005551574 | 1.55578661  | down |
| Nrip1            | 0.005589256 | 1.901708245 | up   |
| Lats1            | 0.005634014 | 1.504541278 | down |
| Efna1            | 0.005654887 | 1.963816285 | up   |
| 5730588111Rik    | 0.00565875  | 2.230804205 | down |
| Meox1            | 0.005663541 | 1.516085982 | up   |
| Rybp             | 0.005663541 | 2.688875437 | down |
| Traf5            | 0.005663541 | 1.698015213 | up   |
| Coq10a           | 0.005675729 | 1.73787272  | up   |
| Klf12            | 0.00568846  | 1.634319186 | up   |
| Nkiras1          | 0.005691702 | 1.80529964  | up   |
| C130064E22Rik    | 0.005715569 | 1.67504251  | up   |
| Hbb-b1           | 0.005717211 | 11.01275826 | up   |
| Erc8             | 0.005717423 | 1.588830948 | down |
| G430046L24Rik    | 0.005726233 | 1.94635582  | up   |
| LOC270665        | 0.00572809  | 2.291697979 | down |
| 4930461P20Rik    | 0.005733859 | 1.505496025 | down |
| A230054D04Rik    | 0.005733859 | 1.724951625 | down |
| Tmem209          | 0.005734813 | 1.625501871 | up   |
| Nol8             | 0.005736833 | 1.943742633 | down |
| A930023F12Rik    | 0.005738542 | 2.036361933 | up   |
| scl0002917.1_537 | 0.00574402  | 2.392357349 | up   |
| 1700065A05Rik    | 0.005755828 | 1.54212153  | down |
| Ptges3           | 0.005755828 | 1.512616515 | up   |
| A930041H05Rik    | 0.005756887 | 2.0625844   | up   |
| Slc18a2          | 0.005756887 | 1.563637495 | down |
| Tbxa2r           | 0.005759698 | 1.522086501 | up   |
| Fat3             | 0.005762611 | 2.421111107 | up   |
| 2900086B20Rik    | 0.005776132 | 1.876333356 | up   |
| Neil3            | 0.005776764 | 1.662075877 | up   |
| Nrp1             | 0.005776764 | 2.144967794 | up   |
| Etfb             | 0.00580356  | 1.617002487 | up   |
| LOC100047199     | 0.005818188 | 1.692160964 | down |
| Tmem106a         | 0.005819449 | 1.815490961 | up   |
| Mis12            | 0.00582065  | 1.669887424 | up   |
| 9430011C21Rik    | 0.005828396 | 1.669133425 | up   |
| EG639396         | 0.005833225 | 2.0125916   | up   |
| Pomt1            | 0.005848301 | 1.609034896 | down |
| Gpt1             | 0.005856303 | 2.055529594 | up   |
| LOC632230        | 0.00585949  | 1.605922818 | up   |
| Polr2k           | 0.005861284 | 1.529259324 | down |
| 5832402A02Rik    | 0.005863638 | 2.08346343  | down |
| D130046C19Rik    | 0.005868259 | 1.791828394 | up   |
| Tmem138          | 0.005869458 | 1.766551733 | up   |
| Ltbp4            | 0.005875729 | 2.162314415 | up   |
| Cd248            | 0.005890566 | 1.979718924 | up   |
| Mzf1             | 0.005895618 | 1.586893082 | up   |
| Ift20            | 0.005898799 | 1.633449197 | down |
| Cdon             | 0.005925043 | 1.829356194 | down |
| Aldh16a1         | 0.00592869  | 1.529728532 | up   |
| BC024479         | 0.005941432 | 1.52166009  | up   |

|                |             |             |      |
|----------------|-------------|-------------|------|
| Msrb3          | 0.005945401 | 1.54449749  | down |
| Khk            | 0.005958943 | 1.667796016 | up   |
| 9130415E20Rik  | 0.005965845 | 1.927278638 | up   |
| Vav2           | 0.005965845 | 1.735313058 | up   |
| Prodh          | 0.005970187 | 1.555651903 | up   |
| Rhbdd3         | 0.005971105 | 1.788918138 | up   |
| Angptl2        | 0.005972808 | 1.522541285 | down |
| Samd4b         | 0.005972808 | 1.63491559  | up   |
| C430002D13Rik  | 0.00598027  | 1.831830621 | up   |
| Dchs1          | 0.005982289 | 1.511523962 | up   |
| Tgfb1          | 0.005983145 | 2.191161633 | up   |
| Adamts18       | 0.005984629 | 1.659858108 | down |
| Cd52           | 0.00600267  | 1.619703412 | up   |
| E130102H24Rik  | 0.006024243 | 1.527656674 | down |
| Rrs1           | 0.006045575 | 1.514943242 | up   |
| Dapk1          | 0.006055682 | 1.667805314 | up   |
| Gart           | 0.006068474 | 2.161578417 | up   |
| Tpk1           | 0.006078617 | 1.909199596 | down |
| Pdgfrb         | 0.006105201 | 1.742510676 | up   |
| Sp3            | 0.006109928 | 2.323744059 | up   |
| Serpinb6a      | 0.006120017 | 1.912746906 | up   |
| Ssu72          | 0.006122753 | 1.519582152 | up   |
| Mtap9          | 0.006129619 | 1.615566135 | up   |
| Nox4           | 0.006130789 | 1.560741186 | up   |
| scl0001546.1_9 | 0.006140406 | 1.5075804   | down |
| 5830431115Rik  | 0.006146356 | 1.506254196 | up   |
| Sall1          | 0.006147947 | 1.54611373  | down |
| Trex1          | 0.006147947 | 1.811471939 | up   |
| Tro            | 0.006147947 | 1.722679257 | up   |
| Usp21          | 0.006163162 | 1.599565387 | up   |
| Olf297         | 0.006167786 | 1.54493022  | down |
| Nit1           | 0.006177865 | 1.79923749  | up   |
| Zfp346         | 0.006177906 | 1.528286099 | up   |
| Rapgef2        | 0.006204609 | 1.643891573 | down |
| 2900076A13Rik  | 0.006206536 | 2.147435904 | up   |
| A630086P05Rik  | 0.006206536 | 1.728210688 | up   |
| LOC100040505   | 0.00620969  | 1.609685659 | down |
| Eif1ay         | 0.006212865 | 2.10759449  | down |
| 6030408C04Rik  | 0.006236507 | 1.538253665 | down |
| Lrp6           | 0.006256679 | 1.753937602 | down |
| Dnahc2         | 0.006257913 | 1.502902627 | up   |
| Tmpo           | 0.006257913 | 1.981946707 | down |
| Slc37a4        | 0.006259788 | 1.604335785 | up   |
| Ccdc124        | 0.00627255  | 1.611684561 | up   |
| H1fx           | 0.0062869   | 1.55358541  | up   |
| Mapk1ip1l      | 0.006291644 | 1.577905297 | down |
| Recql4         | 0.006291644 | 1.511767268 | up   |
| Tmem110        | 0.006291644 | 1.717358589 | up   |
| Slc6a17        | 0.006295051 | 1.5684551   | up   |
| Psm10          | 0.006296875 | 1.788839459 | down |
| Llph           | 0.006307926 | 1.501343131 | down |
| Acrbp          | 0.00631118  | 1.657830715 | up   |



|               |             |             |      |
|---------------|-------------|-------------|------|
| Zdhhc7        | 0.0063267   | 1.714392781 | up   |
| LOC638301     | 0.006376049 | 1.66268611  | up   |
| Myd88         | 0.006377279 | 1.865250111 | up   |
| Pam           | 0.006381533 | 1.759858728 | up   |
| LOC381739     | 0.006390806 | 1.53563726  | up   |
| Rgs4          | 0.006390806 | 1.52838552  | down |
| Usp40         | 0.006391777 | 1.582900286 | down |
| 8430438L13Rik | 0.006403898 | 1.507282257 | up   |
| Rps6ka5       | 0.006403898 | 1.908997893 | down |
| LOC384888     | 0.006409206 | 1.544514179 | down |
| Cchcr1        | 0.006434869 | 1.753664374 | up   |
| 2410187C16Rik | 0.006446272 | 1.716914654 | down |
| A430005L14Rik | 0.006446718 | 1.770915151 | down |
| Mrpl20        | 0.006460141 | 1.623801112 | up   |
| Crybg3        | 0.006462977 | 1.740251303 | up   |
| Ela1          | 0.006477522 | 1.761190891 | up   |
| LOC100048196  | 0.00648168  | 1.521303892 | down |
| Numbl         | 0.006511483 | 1.558754206 | up   |
| Gtf3c1        | 0.006511806 | 1.64692986  | up   |
| H2-Q5         | 0.006526819 | 1.563943863 | up   |
| LOC280487     | 0.006532069 | 4.341693878 | up   |
| A430110N23Rik | 0.006536723 | 1.611422777 | up   |
| 5730412F04Rik | 0.006545079 | 1.517970085 | up   |
| 6720484G13Rik | 0.006558534 | 2.16824007  | up   |
| Rai16         | 0.006558534 | 1.506459832 | down |
| Itpr3         | 0.006563694 | 1.780572414 | up   |
| A630075K04Rik | 0.00656485  | 2.342200518 | up   |
| mtDNA_ND3     | 0.006570143 | 2.006347656 | up   |
| B930095M22Rik | 0.00658334  | 1.835411072 | up   |
| Med20         | 0.006583931 | 1.579709888 | up   |
| Hnrpa0        | 0.006584297 | 3.883134604 | down |
| 9930016F01Rik | 0.006590848 | 1.582425952 | up   |
| Eif5          | 0.006590848 | 2.419942617 | down |
| Kat2a         | 0.006590848 | 1.551998138 | up   |
| LOC677528     | 0.006590848 | 2.240868807 | down |
| Orai1         | 0.006597783 | 1.714620352 | up   |
| Psme3         | 0.006612435 | 1.721612215 | up   |
| Cops5         | 0.006613039 | 1.533055544 | down |
| EG624187      | 0.006655193 | 1.574839473 | down |
| D630024O11Rik | 0.006657379 | 1.526559115 | down |
| Eif3m         | 0.006658135 | 1.769789219 | up   |
| LOC433225     | 0.006669584 | 1.571968675 | up   |
| Nlr1          | 0.006675617 | 1.595674872 | up   |
| Trpm3         | 0.006679846 | 1.53155458  | down |
| LOC280097     | 0.006684156 | 2.596028566 | up   |
| Pqlc2         | 0.006686962 | 1.507405043 | up   |
| Mapk11        | 0.006693395 | 1.957633734 | up   |
| Ppp3ca        | 0.006700583 | 1.671500087 | down |
| Cacnb1        | 0.006703834 | 1.914827824 | up   |
| Jdp2          | 0.006724594 | 1.564003229 | down |
| D930030O05Rik | 0.006726141 | 2.064258575 | up   |
| Ccdc21        | 0.00675559  | 1.608210802 | up   |

|               |             |             |      |
|---------------|-------------|-------------|------|
| Plekxb1       | 0.006772305 | 1.838961244 | down |
| B930083D07Rik | 0.006778633 | 1.546908021 | up   |
| 5330435L01Rik | 0.00678243  | 1.730686903 | up   |
| Crat          | 0.006789114 | 1.672328115 | up   |
| Wdhd1         | 0.006789337 | 1.890445948 | down |
| Rnf130        | 0.006796084 | 1.755230188 | down |
| LOC673251     | 0.006799945 | 2.023995638 | up   |
| Zbed4         | 0.006801098 | 1.814566135 | up   |
| 6430510B20Rik | 0.006827403 | 2.03238821  | up   |
| Plekhh3       | 0.006844669 | 1.506163836 | up   |
| Ero1l         | 0.006847903 | 2.254576683 | down |
| 9530082115Rik | 0.006858739 | 2.117924929 | up   |
| Dock7         | 0.006865747 | 1.701973796 | down |
| LOC667776     | 0.006874622 | 1.606609345 | down |
| Tbrg4         | 0.006875109 | 1.539784312 | up   |
| Eif3j         | 0.006879433 | 1.555539489 | up   |
| 4933412E12Rik | 0.006893668 | 1.587571621 | up   |
| Kif4          | 0.006901765 | 1.595390678 | down |
| D130056F09Rik | 0.006945476 | 1.519127488 | up   |
| BC028528      | 0.00694874  | 1.729522348 | up   |
| Yod1          | 0.006949807 | 1.717067719 | down |
| Hgf           | 0.006952351 | 2.11736989  | up   |
| Zfp768        | 0.006957803 | 1.780971408 | up   |
| Sgpl1         | 0.006958703 | 1.68122673  | up   |
| Sumf1         | 0.006966741 | 1.816872358 | up   |
| 1110001C20Rik | 0.006984963 | 1.970763207 | up   |
| A730059M13Rik | 0.006997832 | 1.756013632 | up   |
| Dynlt3        | 0.007013311 | 1.600622416 | up   |
| Hagh          | 0.007047785 | 1.698992133 | up   |
| Col23a1       | 0.007055892 | 1.654782653 | up   |
| 2900084I15Rik | 0.007061101 | 2.520194769 | up   |
| Topors        | 0.007063613 | 1.521262407 | down |
| Sfrs8         | 0.00706396  | 1.503165126 | down |
| Whsc111       | 0.007074345 | 1.747263551 | up   |
| LOC433955     | 0.007074375 | 1.823660255 | down |
| Rac1          | 0.007090396 | 1.570001602 | down |
| Tomm70a       | 0.007093607 | 1.830922127 | up   |
| Cit           | 0.007096448 | 1.884291768 | up   |
| Zbed3         | 0.007097998 | 1.952820301 | up   |
| Crocc         | 0.007107576 | 1.50797689  | up   |
| Heph          | 0.007113596 | 1.744532108 | down |
| Cugbp1        | 0.00711619  | 1.674615145 | down |
| 2610024G14Rik | 0.0071274   | 1.509647369 | down |
| BC031748      | 0.007128548 | 1.636994362 | down |
| Ccdc49        | 0.007146164 | 1.593333364 | up   |
| 9330154F10Rik | 0.007173993 | 1.729670644 | up   |
| Gzf1          | 0.007177319 | 2.20673728  | down |
| Nfatc1        | 0.007184153 | 2.426151514 | down |
| Sidt2         | 0.007212758 | 2.055463076 | up   |
| LOC100040413  | 0.007213186 | 1.538741589 | up   |
| Ccnt2         | 0.007242712 | 1.706705809 | down |
| Fgl1          | 0.007250884 | 1.56188643  | up   |

|               |             |             |      |
|---------------|-------------|-------------|------|
| 2610009E16Rik | 0.00726379  | 2.025816679 | up   |
| 9630027M13Rik | 0.007264113 | 1.78845489  | up   |
| Sema3d        | 0.007264698 | 2.825622559 | down |
| Bach2         | 0.007266089 | 1.610206008 | down |
| D3Ertd254e    | 0.007266806 | 1.725127697 | up   |
| Yipf1         | 0.007268749 | 1.664879918 | up   |
| Tsen54        | 0.00726983  | 1.732044101 | up   |
| Zdhhc20       | 0.00729516  | 1.697941423 | down |
| Stat3         | 0.007295576 | 1.71934104  | up   |
| C820018A03Rik | 0.00730188  | 1.824666023 | up   |
| Lbh           | 0.00730188  | 1.930043578 | down |
| Megf6         | 0.007306946 | 1.525348306 | up   |
| LOC385905     | 0.007320766 | 1.583931804 | down |
| 4432404P07Rik | 0.007321294 | 1.530806541 | up   |
| 6430540A14Rik | 0.007326144 | 2.133250475 | down |
| C030011O14Rik | 0.007326144 | 2.166157246 | down |
| LOC100045864  | 0.007334522 | 2.292016029 | up   |
| Sox18         | 0.007335377 | 1.547066927 | up   |
| LOC100047837  | 0.00733701  | 1.754850745 | down |
| Vgll4         | 0.00733701  | 1.723965287 | down |
| 0610037P05Rik | 0.007339487 | 2.161350489 | down |
| Papd1         | 0.007360063 | 1.592164397 | up   |
| Gas8          | 0.007370448 | 1.571739078 | up   |
| Il10ra        | 0.007370448 | 1.87403357  | up   |
| Tgfb2         | 0.007371847 | 2.04001236  | down |
| Pcf11         | 0.007406446 | 1.578695774 | down |
| Edil3         | 0.00742321  | 1.737264156 | down |
| A830094I09Rik | 0.007425921 | 1.538524389 | up   |
| Bcl2l1        | 0.007446119 | 1.568951726 | down |
| Ahi1          | 0.007457739 | 1.553654432 | up   |
| 1810006K21Rik | 0.007469793 | 1.502086163 | down |
| 3010015K02Rik | 0.007486884 | 1.568228602 | down |
| Csf3r         | 0.007486884 | 1.615186572 | up   |
| Mrv1          | 0.007510294 | 1.755532622 | up   |
| 6720411N02Rik | 0.007520549 | 1.959032178 | up   |
| P4ha1         | 0.007525927 | 3.943559647 | down |
| Cybb          | 0.007530027 | 2.103700638 | up   |
| Fgf10         | 0.007545813 | 1.955385685 | up   |
| Arhgap4       | 0.00755505  | 2.087489605 | up   |
| Slc2a6        | 0.00755505  | 1.614160061 | up   |
| Al426953      | 0.007559771 | 1.505065322 | up   |
| 6720406L13Rik | 0.007574352 | 1.58174026  | up   |
| Cpa2          | 0.007593787 | 1.565110564 | up   |
| Sertad4       | 0.007594778 | 1.795625091 | down |
| B230345P09Rik | 0.00760504  | 1.590972543 | up   |
| Cct5          | 0.007605317 | 1.723612666 | up   |
| Etnk1         | 0.007617883 | 1.760130048 | down |
| 1810011O10Rik | 0.007619218 | 1.849944472 | up   |
| Lemd2         | 0.007619218 | 1.64338541  | up   |
| Hnrpa3        | 0.007620641 | 1.7768327   | down |
| Eral1         | 0.007623511 | 1.71159935  | down |
| Mmrn2         | 0.007642384 | 1.707075596 | up   |

|                 |             |             |      |
|-----------------|-------------|-------------|------|
| Hcn3            | 0.007646611 | 1.596190691 | up   |
| 2810008M24Rik   | 0.007649352 | 1.763946772 | down |
| 9430068D24Rik   | 0.007649352 | 1.715135455 | up   |
| 1600027N09Rik   | 0.007653305 | 1.516192198 | up   |
| A130064M08Rik   | 0.007658593 | 1.746639609 | down |
| 2900057K09Rik   | 0.00765973  | 1.506816864 | up   |
| D430033H22Rik   | 0.00765973  | 1.917791724 | up   |
| Fkbp2           | 0.007661977 | 1.548802495 | down |
| A330081F11Rik   | 0.007665943 | 1.566189885 | up   |
| Zswim4          | 0.007668739 | 1.62197876  | up   |
| Snx16           | 0.007672016 | 1.689698577 | down |
| Snrpb           | 0.007672081 | 2.195340395 | down |
| Arrb2           | 0.007678956 | 2.324901342 | up   |
| AU022252        | 0.007708447 | 1.544862509 | down |
| Kif3a           | 0.007720362 | 1.583743095 | up   |
| Hddc3           | 0.007723078 | 1.602972627 | up   |
| LOC625074       | 0.007729635 | 2.159573317 | down |
| Timp3           | 0.007730238 | 1.953484774 | down |
| Strn4           | 0.00774313  | 1.579439163 | up   |
| Crlf1           | 0.007746725 | 2.248845816 | up   |
| 4930453J04Rik   | 0.007749501 | 1.777502894 | up   |
| Sparc           | 0.007753571 | 1.542048097 | up   |
| Gpt2            | 0.007764532 | 1.777121782 | up   |
| Setd4           | 0.007779322 | 1.624795914 | up   |
| Aco2            | 0.007783343 | 1.567709565 | up   |
| Mapbpip-pending | 0.007811056 | 1.863490582 | down |
| 2610204K14Rik   | 0.007815612 | 1.655524254 | down |
| Mnat1           | 0.007825735 | 1.589990497 | down |
| Spag9           | 0.007832808 | 1.92768085  | up   |
| Psemb10         | 0.00783932  | 1.606684089 | up   |
| B930001L07Rik   | 0.007888787 | 1.505724788 | up   |
| Malt1           | 0.00789234  | 1.50060451  | up   |
| Wipf1           | 0.007897073 | 1.531025767 | up   |
| Map3k14         | 0.007908676 | 1.595227003 | up   |
| Banf1           | 0.007919827 | 1.724830985 | down |
| D030067L12Rik   | 0.007938294 | 2.271827221 | up   |
| Abcd2           | 0.007941433 | 1.52710855  | down |
| Cenpa           | 0.007943437 | 1.62842083  | down |
| 9030420J04Rik   | 0.007950031 | 1.654085875 | down |
| Map3k12         | 0.007965604 | 1.673395276 | up   |
| Fxyd3           | 0.007980116 | 1.668602943 | down |
| Hoxa11          | 0.007983535 | 2.684180737 | up   |
| Igh-6           | 0.008019278 | 1.630828857 | up   |
| Dpagt1          | 0.008060529 | 1.541120768 | up   |
| A730085F06Rik   | 0.008060628 | 1.764216542 | up   |
| D7Ertd791e      | 0.008063247 | 1.951877713 | up   |
| Fam161b         | 0.008063247 | 1.623941183 | up   |
| Bbx             | 0.008063726 | 1.656403065 | up   |
| Trim45          | 0.008070354 | 1.506572127 | up   |
| A130036M01Rik   | 0.008071975 | 1.550291538 | up   |
| Lars            | 0.008085735 | 1.524615288 | down |
| LOC100043822    | 0.008118144 | 1.571355224 | up   |

|                 |             |             |      |
|-----------------|-------------|-------------|------|
| 5930436O19Rik   | 0.008123036 | 2.281885386 | up   |
| Irf3            | 0.008123036 | 1.772134185 | up   |
| Myo5a           | 0.008123604 | 1.863202572 | down |
| Dnalc1          | 0.008133831 | 2.035719633 | down |
| Itgb1           | 0.008136091 | 1.658383369 | down |
| Cenpp           | 0.008140866 | 1.542114377 | down |
| Dnmbp           | 0.008140866 | 1.532333851 | down |
| LOC676779       | 0.008163164 | 1.711494803 | up   |
| Apip            | 0.00816882  | 2.063208818 | down |
| Map2k2          | 0.008179583 | 1.528298974 | up   |
| 4733401H18Rik   | 0.008183    | 1.513824701 | up   |
| Adra1a, GPCR    | 0.008184932 | 1.502889156 | up   |
| Chuk            | 0.008186054 | 2.294175386 | down |
| 6430510B20Rik   | 0.008188204 | 1.551620007 | up   |
| Lrrc29          | 0.008195794 | 1.521802068 | down |
| Mtmr14          | 0.008195794 | 1.788615465 | down |
| Phf6            | 0.008199561 | 4.024706841 | down |
| H1f0            | 0.008201217 | 1.588948965 | up   |
| A830085I22Rik   | 0.008217461 | 1.662042499 | up   |
| LOC231869       | 0.00822289  | 1.6033746   | down |
| LOC632664       | 0.008223435 | 1.892603517 | down |
| Ltbp2           | 0.008226108 | 2.101990461 | up   |
| Zfyve16         | 0.0082346   | 1.587528944 | down |
| Tbc1d19         | 0.008238553 | 1.680420637 | up   |
| Cars            | 0.008244781 | 1.905957341 | up   |
| Rasa4           | 0.008248474 | 1.622083306 | down |
| scl0001987.1_16 | 0.00825443  | 2.794271469 | down |
| Hbb-b1          | 0.008257683 | 10.36927605 | up   |
| 1110067D22Rik   | 0.008272398 | 1.642856002 | down |
| A430005L14Rik   | 0.0082726   | 1.847074986 | down |
| Ndor1           | 0.0082726   | 2.366375923 | up   |
| LOC385653       | 0.008290377 | 1.7332021   | up   |
| 2810428I15Rik   | 0.008294058 | 1.82010591  | up   |
| 5730406M06Rik   | 0.008306185 | 2.215594053 | down |
| Heatr1          | 0.008311891 | 1.579590082 | up   |
| Vat1            | 0.008313851 | 2.656697989 | up   |
| A130056J21Rik   | 0.008329433 | 1.658133864 | up   |
| W91709          | 0.008335569 | 1.751603484 | up   |
| Mvp             | 0.008339453 | 2.110854149 | up   |
| Asph            | 0.008341668 | 1.670410752 | down |
| Gas6            | 0.008390803 | 2.446539879 | up   |
| A230061N24Rik   | 0.008395216 | 1.781887412 | up   |
| B9d2            | 0.008400626 | 1.663969159 | up   |
| Coq10b          | 0.008403073 | 2.124149323 | down |
| 9930031P18Rik   | 0.008403851 | 2.972957611 | up   |
| Ogn             | 0.008420856 | 2.050099611 | down |
| Ring1           | 0.008420856 | 1.561141014 | up   |
| Tmem175         | 0.008420856 | 1.527140856 | up   |
| Gpaa1           | 0.008434706 | 1.619491816 | up   |
| Cables2         | 0.008437568 | 1.5495435   | down |
| Lsm6            | 0.008448868 | 1.530593514 | up   |
| Odz2            | 0.008453477 | 1.597476363 | up   |

|               |             |             |      |
|---------------|-------------|-------------|------|
| Dck           | 0.008486369 | 2.230581284 | down |
| Lmf2          | 0.00848947  | 1.570897222 | up   |
| Samd9l        | 0.008507475 | 1.850743532 | up   |
| Cdk5rap1      | 0.008507537 | 1.920630217 | down |
| Lig3          | 0.008518401 | 1.570862413 | down |
| Abcc3         | 0.008541925 | 2.24664855  | up   |
| Myh8          | 0.008542935 | 1.840352058 | up   |
| Sobp          | 0.008555383 | 1.753223777 | down |
| Cnn2          | 0.008562737 | 2.338953495 | down |
| Notch4        | 0.008597329 | 1.774282813 | up   |
| Chic2         | 0.008601704 | 1.743302584 | down |
| D030038A19Rik | 0.00860244  | 1.560141683 | down |
| Ppa2          | 0.008621655 | 1.895563006 | down |
| B130047N10Rik | 0.008621679 | 1.734124184 | up   |
| 1110003P22Rik | 0.008646946 | 1.704634547 | up   |
| 6030432P03Rik | 0.008646946 | 2.691040039 | up   |
| Blcap         | 0.008646946 | 1.580827475 | up   |
| Pmepa1        | 0.008646946 | 1.68865335  | up   |
| 1810011H11Rik | 0.008665488 | 1.799540281 | up   |
| Nol3          | 0.008674676 | 1.744079709 | up   |
| Sp4           | 0.008695202 | 1.592820764 | up   |
| Hectd1        | 0.00869523  | 1.569911122 | up   |
| LOC385157     | 0.008707533 | 1.53238976  | down |
| Tspan9        | 0.008710968 | 1.64148283  | down |
| C230089D15Rik | 0.008739411 | 1.55996418  | up   |
| Shmt1         | 0.008742416 | 1.634525418 | down |
| Pcdhb17       | 0.008748099 | 2.34493041  | up   |
| 2900045G02Rik | 0.008761293 | 1.542642236 | up   |
| LOC634327     | 0.008770812 | 1.843144059 | up   |
| 2310047C21Rik | 0.008778505 | 1.908691526 | up   |
| Pik3cg        | 0.008778505 | 2.137208462 | up   |
| Elovl4        | 0.00878603  | 1.584355354 | up   |
| Stat3         | 0.008799612 | 1.732340813 | up   |
| Hbb-b1        | 0.008808971 | 11.68254185 | up   |
| Hist1h3c      | 0.008812988 | 1.704137564 | down |
| Lmo7          | 0.008819644 | 1.513558269 | up   |
| Set           | 0.008820343 | 1.526901245 | up   |
| Rad1          | 0.008826394 | 1.649336696 | down |
| Nfe2          | 0.008831919 | 1.718353748 | up   |
| Vldlr         | 0.008837847 | 1.6878438   | down |
| Hnrpa2b1      | 0.008863835 | 1.699638963 | down |
| Zfp618        | 0.008875394 | 1.567986131 | up   |
| Msh2          | 0.0088838   | 1.618874908 | up   |
| Egflam        | 0.008915268 | 1.92677033  | down |
| D630021H01Rik | 0.008946964 | 1.902314067 | up   |
| Hmcn1         | 0.008964982 | 3.694500208 | down |
| Cenpq         | 0.00896723  | 1.5536232   | down |
| Hs3st1        | 0.008971364 | 1.553391099 | down |
| Nrf1          | 0.008974687 | 1.678323507 | up   |
| E130203B14Rik | 0.008976108 | 1.60699892  | up   |
| Lrrc59        | 0.00902264  | 1.913923025 | up   |
| Hs3st3b1      | 0.00904921  | 2.216298819 | down |

|               |             |             |      |
|---------------|-------------|-------------|------|
| Spsb1         | 0.009068527 | 2.480366468 | down |
| LOC385019     | 0.009087567 | 1.952277184 | up   |
| Cd14          | 0.009090838 | 1.905990839 | up   |
| Fap           | 0.009111305 | 1.579413056 | up   |
| Chst11        | 0.00911522  | 1.705717921 | down |
| Fnbp1         | 0.009119293 | 1.915147185 | up   |
| LOC100041172  | 0.009156411 | 1.973166108 | down |
| LOC622994     | 0.009161793 | 1.529569268 | down |
| A630082K20Rik | 0.009162616 | 4.443362713 | down |
| 9130024F11Rik | 0.009164334 | 1.864141822 | down |
| Mad           | 0.009166428 | 1.920981526 | up   |
| Cdkn1b        | 0.009167351 | 1.725129128 | down |
| Jag1          | 0.009167351 | 2.487917185 | up   |
| LOC674960     | 0.009171879 | 1.702018976 | down |
| Irak1         | 0.009172902 | 1.520924449 | up   |
| 2810001G20Rik | 0.009178686 | 1.537947655 | down |
| EG633285      | 0.009201883 | 1.625074506 | down |
| LOC100042749  | 0.009208008 | 1.772324443 | down |
| Myl9          | 0.009212836 | 1.785691381 | down |
| 4930402H24Rik | 0.009220541 | 1.547660351 | up   |
| EG432649      | 0.009226141 | 1.652814984 | down |
| B230345P09Rik | 0.009262146 | 1.672502518 | up   |
| Psmc4         | 0.0092637   | 1.759011865 | down |
| A730008L03Rik | 0.00928941  | 1.506702185 | down |
| Ankrd39       | 0.009292291 | 1.502973676 | down |
| D030038I21Rik | 0.009300808 | 1.587367058 | down |
| Pvalb         | 0.009308955 | 1.763083696 | down |
| Esm1          | 0.009309885 | 1.808077216 | up   |
| Osbpl1a       | 0.009310634 | 1.561669827 | down |
| Unc5b         | 0.009335274 | 1.792660475 | down |
| Zfhx3         | 0.009338832 | 1.900578857 | up   |
| LOC671641     | 0.009343702 | 1.604619265 | down |
| Mon1b         | 0.009360699 | 1.941350937 | up   |
| Zfp740        | 0.009386306 | 1.75446856  | up   |
| Sesn3         | 0.009386758 | 2.475210667 | down |
| Btf3          | 0.00941287  | 1.503463268 | down |
| A630006E02Rik | 0.009424369 | 1.582386255 | up   |
| Smchd1        | 0.009428795 | 2.070747137 | down |
| Tmem39b       | 0.009433996 | 1.683129549 | up   |
| Gabarapl1     | 0.009434327 | 1.636587262 | up   |
| Comp          | 0.009446345 | 1.549821734 | down |
| Coro1a        | 0.009455524 | 1.964322329 | up   |
| 4930527B16Rik | 0.009458085 | 2.029313564 | up   |
| Fin14         | 0.009458085 | 1.638801456 | up   |
| Dbnl          | 0.009463659 | 1.51051414  | up   |
| Evl           | 0.009470629 | 1.865595222 | up   |
| 2900056P18Rik | 0.009481836 | 1.604686618 | up   |
| Pcdh7         | 0.009481836 | 1.887733936 | up   |
| 2010013I23Rik | 0.009509441 | 1.552217126 | up   |
| Tmem2         | 0.009520023 | 1.734024167 | down |
| B330002M01Rik | 0.009558775 | 1.855526209 | up   |
| Mgll          | 0.009578668 | 1.527316213 | down |

|               |             |             |      |
|---------------|-------------|-------------|------|
| Chd2          | 0.00958309  | 1.902526021 | down |
| Pcdh10        | 0.009588509 | 1.756918907 | up   |
| BC018101      | 0.009602986 | 2.036296606 | down |
| 1600002K03Rik | 0.009611566 | 1.805472732 | up   |
| Heatr5b       | 0.009611566 | 1.657566786 | down |
| Kpnb3         | 0.009611566 | 1.710688949 | up   |
| Psemb9        | 0.009641325 | 1.73197794  | up   |
| Lrp12         | 0.009658743 | 2.219601631 | down |
| 4932415A06Rik | 0.009660511 | 2.045112371 | up   |
| 5730427N09Rik | 0.00966764  | 1.687896848 | down |
| Pde3a         | 0.00966764  | 1.686952591 | down |
| Ncoa5         | 0.009678399 | 1.958404422 | up   |
| Ddx19b        | 0.009683654 | 1.612854123 | up   |
| 6820401H01Rik | 0.009695361 | 1.560216188 | up   |
| Abcg5         | 0.009718075 | 1.619966626 | down |
| 3110098I04Rik | 0.009726824 | 1.545076847 | up   |
| 2900064A13Rik | 0.009727925 | 1.531754255 | up   |
| Pcdhga2       | 0.009774162 | 1.580206633 | up   |
| LOC677216     | 0.00979091  | 1.531238794 | down |
| Ccdc123       | 0.009806793 | 1.604761481 | up   |
| Nt5dc1        | 0.009806793 | 1.52340281  | down |
| Acta1         | 0.009818102 | 2.08486104  | up   |
| Armc6         | 0.009818259 | 1.69775629  | up   |
| Mvd           | 0.009838119 | 1.836176395 | up   |
| Hbb-b1        | 0.00984496  | 10.18876648 | up   |
| Asna1         | 0.009863357 | 1.699867249 | up   |
| Rdx           | 0.009877494 | 1.53045404  | up   |
| Dact1         | 0.009898949 | 2.167698622 | down |
| 9230105E05Rik | 0.009901953 | 1.88351047  | up   |
| Acox1         | 0.009907384 | 1.558616877 | up   |
| Chic1         | 0.009909249 | 1.547627926 | up   |
| Opn3          | 0.009909249 | 1.521458864 | down |
| Myg1          | 0.009915611 | 1.672569156 | down |
| 9130023F12Rik | 0.00991959  | 1.746603489 | up   |
| E030022I16Rik | 0.009923281 | 1.870226026 | up   |
| Jun           | 0.009923281 | 1.758324981 | up   |
| Fam13b        | 0.009942399 | 1.568321943 | down |
| St6galnac6    | 0.009942576 | 1.544875264 | down |
| D630038D15Rik | 0.009942678 | 1.756213546 | up   |
| 5330423I11Rik | 0.009948895 | 2.764455319 | up   |
| Cntnap4       | 0.009966043 | 1.799120307 | up   |
| 3222402P14Rik | 0.009970452 | 1.777629852 | down |
| Zfp704        | 0.009976918 | 1.911498547 | up   |
| Fkbp10        | 0.009979163 | 1.802869082 | up   |
| Nov           | 0.009984454 | 1.56094873  | up   |
| LOC100046056  | 0.010037093 | 1.606394649 | up   |
| Col4a3bp      | 0.010038231 | 1.616967559 | down |
| LOC635455     | 0.01003891  | 1.614647269 | down |
| LOC667582     | 0.010053158 | 1.81360054  | up   |
| Mthfsd        | 0.010053158 | 1.535512686 | up   |
| Rnd3          | 0.010053158 | 2.658306122 | down |
| Zmynd17       | 0.010063926 | 1.522825241 | up   |



|                 |             |             |      |
|-----------------|-------------|-------------|------|
| Abi1            | 0.010065002 | 1.689291954 | up   |
| Cntn1           | 0.010065002 | 1.655365348 | down |
| LOC100044696    | 0.010082787 | 1.946960926 | down |
| Msl31           | 0.010085437 | 1.614193797 | up   |
| Zw10            | 0.010113312 | 1.505553246 | down |
| Abcb6           | 0.010119963 | 1.611995339 | up   |
| 2310043N10Rik   | 0.010135837 | 2.246186018 | up   |
| Foxp2           | 0.010155139 | 1.72091639  | down |
| Maml2           | 0.010211166 | 1.647469759 | down |
| Cald1           | 0.010219355 | 1.581065774 | down |
| Ccdc99          | 0.010219355 | 1.664839625 | down |
| Cpm             | 0.010219355 | 1.511164546 | up   |
| Camkv           | 0.01023847  | 1.606053829 | up   |
| Skil            | 0.010240001 | 1.675926328 | up   |
| Itga9           | 0.010271408 | 1.867954493 | up   |
| scl0001617.1_31 | 0.010274079 | 1.660932064 | down |
| Ptpv            | 0.010318783 | 2.217592716 | up   |
| C030039L03Rik   | 0.01037596  | 1.568364263 | up   |
| Hoxb7           | 0.010384735 | 2.053483725 | up   |
| Slc26a7         | 0.010403797 | 2.313343048 | down |
| Lrrc8d          | 0.010409291 | 1.506517887 | down |
| Phlpp           | 0.010411132 | 1.588183165 | up   |
| Nbl1            | 0.010422678 | 1.588342786 | up   |
| Hbb-b1          | 0.01045256  | 9.665819168 | up   |
| A730036E13Rik   | 0.010457528 | 1.947786808 | up   |
| Reps1           | 0.010457947 | 1.549705744 | down |
| Lca5            | 0.010472329 | 1.678013563 | down |
| Gins3           | 0.010476746 | 1.531025171 | up   |
| Gga3            | 0.010481935 | 1.60785532  | up   |
| LOC636450       | 0.010510104 | 1.676447988 | down |
| 9430088B20Rik   | 0.010548236 | 1.760051012 | up   |
| Eda2r           | 0.010548236 | 1.682371259 | up   |
| 5730406F04Rik   | 0.010549391 | 1.636396647 | down |
| S100pbp         | 0.010558038 | 1.701884747 | down |
| Soat1           | 0.010595559 | 1.511939764 | up   |
| Fbn2            | 0.010622274 | 1.77337563  | up   |
| C230066I17Rik   | 0.010624968 | 1.695573926 | up   |
| 2610207F23Rik   | 0.010653148 | 1.546695232 | up   |
| Ehd1            | 0.010679529 | 2.436515808 | up   |
| Cecr5           | 0.010699264 | 1.563346624 | up   |
| Nrp1            | 0.010715192 | 1.895717979 | up   |
| Acp1            | 0.010730736 | 2.355880022 | down |
| LOC100041388    | 0.01076128  | 2.183360577 | up   |
| Cfp             | 0.01076364  | 1.58499372  | up   |
| Artn            | 0.010781214 | 1.536741376 | up   |
| Zdhc13          | 0.010853731 | 1.505540013 | down |
| Ralb            | 0.010855238 | 1.575715542 | up   |
| Trpv4           | 0.010855238 | 1.773774862 | down |
| Fasn            | 0.010858424 | 1.66486764  | up   |
| Anln            | 0.010886479 | 1.848033309 | down |
| BC064033        | 0.010899816 | 1.728478193 | down |
| Kif16b          | 0.010904597 | 1.594723463 | down |

|                |             |             |      |
|----------------|-------------|-------------|------|
| 4833423F13Rik  | 0.010915371 | 2.081902742 | up   |
| 1110001M07Rik  | 0.010917298 | 2.313227892 | up   |
| Mark3          | 0.010927745 | 1.69706285  | up   |
| 9330156P08Rik  | 0.010928346 | 1.611035705 | up   |
| Alkbh          | 0.010984945 | 1.624966383 | up   |
| Zfp653         | 0.010986622 | 1.773642659 | up   |
| 1200008A14Rik  | 0.010992971 | 1.567101955 | up   |
| Wdr4           | 0.010999728 | 1.569469333 | down |
| Phka2          | 0.01100707  | 1.790020824 | up   |
| B330012G18Rik  | 0.011012007 | 1.605123282 | up   |
| 3110045I18Rik  | 0.011013804 | 1.723586798 | up   |
| Arpc1b         | 0.011061336 | 1.580965877 | up   |
| Prom           | 0.011063349 | 1.662183762 | down |
| Pot1b          | 0.011066101 | 1.578420997 | down |
| Cxcl16         | 0.011086034 | 1.836426139 | up   |
| Gns            | 0.011086935 | 1.522681952 | up   |
| Lrsam1         | 0.011139535 | 1.504536271 | up   |
| Csnk2a1-rs3    | 0.011209672 | 2.105276346 | up   |
| Lamb2          | 0.011247079 | 1.996034622 | up   |
| Ccdc77         | 0.011292923 | 1.5072577   | up   |
| B130019G13Rik  | 0.011344674 | 1.657706738 | up   |
| C2cd3          | 0.011358844 | 1.671829581 | up   |
| Unc5h3         | 0.011372172 | 1.823118329 | down |
| LOC100046255   | 0.011413404 | 1.509611607 | down |
| LOC675572      | 0.011435394 | 1.612324119 | up   |
| 9628654_317_rc | 0.011446441 | 1.686406612 | up   |
| C79407         | 0.011491498 | 1.526719928 | down |
| BC068157       | 0.0114932   | 2.052378893 | up   |
| Sdccag1        | 0.011508698 | 1.696965218 | down |
| 2810402E24Rik  | 0.011517732 | 1.576729059 | up   |
| LOC100046608   | 0.011533875 | 1.877640724 | down |
| Nras           | 0.011534634 | 1.556427956 | up   |
| Heph           | 0.011559189 | 1.967778206 | down |
| 8430408J07Rik  | 0.011616032 | 1.780914068 | up   |
| C230052J16Rik  | 0.011620862 | 1.656428814 | up   |
| Tspan8         | 0.011627425 | 1.740787864 | down |
| Msi1h          | 0.011630057 | 1.612006068 | up   |
| LOC624784      | 0.011654343 | 1.581131816 | up   |
| 6030416D17Rik  | 0.011659606 | 1.865470767 | up   |
| 9030016H15Rik  | 0.011662223 | 2.530107737 | up   |
| Dock11         | 0.011679944 | 2.097579002 | down |
| Ubr7           | 0.011711195 | 1.924065709 | down |
| Gria4          | 0.011712339 | 1.538630366 | up   |
| Ptprc          | 0.011712614 | 1.818335176 | up   |
| Ubp1           | 0.011738852 | 1.889035821 | up   |
| Pex16          | 0.011750234 | 1.522709847 | up   |
| Zcchc12        | 0.011750234 | 1.60396421  | down |
| Cpxm1          | 0.011757615 | 1.71546936  | up   |
| 2900041H08Rik  | 0.011760511 | 1.583551884 | up   |
| Stard7         | 0.01179724  | 1.598079443 | down |
| Gyk            | 0.01180856  | 1.568989754 | down |
| Rhot2          | 0.011814421 | 1.541172743 | down |

|               |             |             |      |
|---------------|-------------|-------------|------|
| Zfp276        | 0.011814421 | 1.911847115 | up   |
| B930093H17Rik | 0.011881809 | 2.131170034 | up   |
| Cxcl14        | 0.011881971 | 1.616492987 | up   |
| Rerg          | 0.011917487 | 1.511039853 | down |
| Zbtb26        | 0.011935135 | 1.621330738 | up   |
| Apbb1         | 0.011989108 | 1.633399963 | up   |
| Fus           | 0.01200068  | 6.871912479 | down |
| Med30         | 0.012007787 | 1.651039004 | down |
| Atp13a2       | 0.012010627 | 2.187206268 | up   |
| Myst4         | 0.012031172 | 1.982156515 | up   |
| Tmc6          | 0.012031257 | 1.52470541  | up   |
| Ash2l         | 0.012040528 | 1.797225118 | up   |
| A230058F20Rik | 0.012063143 | 1.628465414 | up   |
| Lsm14b        | 0.01207102  | 2.001784086 | down |
| Dtx1          | 0.012080779 | 1.650102973 | up   |
| Tfrc          | 0.012111018 | 1.880373597 | down |
| A430102J17Rik | 0.012149001 | 1.819042444 | up   |
| Prcc          | 0.012168446 | 1.59511435  | up   |
| Lmnb1         | 0.012203296 | 3.909193039 | down |
| Ndufa5        | 0.012214908 | 1.630812168 | down |
| Taldo1        | 0.012258549 | 1.577936173 | up   |
| Nudt14        | 0.012267709 | 1.560656071 | up   |
| Irgq          | 0.012273548 | 1.692682266 | up   |
| Dmd           | 0.012335468 | 2.247594595 | down |
| Eml2          | 0.012349854 | 1.567892671 | down |
| Arl2bp        | 0.012392052 | 1.914765835 | down |
| Faf1          | 0.012399633 | 1.815801978 | down |
| 9330177L23Rik | 0.012409487 | 1.593108177 | up   |
| D5Wsu152e     | 0.012420347 | 1.642475367 | up   |
| 5330439J01Rik | 0.01244428  | 1.93954742  | down |
| Hoxd10        | 0.012449063 | 1.923534751 | up   |
| Gata3         | 0.012506727 | 1.555933714 | down |
| Rtf1          | 0.012520847 | 2.416213274 | down |
| A130001G05Rik | 0.012542888 | 1.965363383 | up   |
| A630076E03Rik | 0.012573157 | 1.655741572 | up   |
| Ltc4s         | 0.012589843 | 1.979646564 | up   |
| Wdr40a        | 0.012628798 | 1.546823978 | up   |
| Snpc4         | 0.012650384 | 1.57585752  | up   |
| 1110003O08Rik | 0.012693488 | 1.83167994  | up   |
| Col2a1        | 0.012693488 | 1.865817666 | down |
| Mfap4         | 0.012701844 | 1.59489429  | up   |
| Ufd1l         | 0.012733715 | 1.587876201 | down |
| Fibp          | 0.012751528 | 1.517603874 | up   |
| B930036M14Rik | 0.012840894 | 1.731819034 | up   |
| Col11a1       | 0.012857841 | 2.09778595  | down |
| EG331392      | 0.012858728 | 1.573738456 | up   |
| Nrd1          | 0.012873653 | 1.569431424 | up   |
| Rian          | 0.012912843 | 2.022321224 | up   |
| Fgfr2         | 0.012926153 | 1.819450498 | down |
| Mprip         | 0.012952995 | 1.705515742 | up   |
| 6330417A16Rik | 0.012978165 | 2.263194799 | up   |
| LOC100044218  | 0.012995481 | 1.523691058 | down |

|               |             |             |      |
|---------------|-------------|-------------|------|
| mtDNA_ND2     | 0.012995481 | 3.769546986 | down |
| 6430550H21Rik | 0.013001067 | 1.71196413  | up   |
| Snx11         | 0.013001067 | 2.044929743 | up   |
| H2afv         | 0.013009328 | 1.559857607 | down |
| Hbb-b1        | 0.013027807 | 7.649670601 | up   |
| Igh-6         | 0.013027807 | 2.170885563 | up   |
| Asph          | 0.013073362 | 1.784584761 | down |
| Ttc14         | 0.013116311 | 1.560758829 | down |
| Eif5          | 0.013145986 | 2.975106716 | down |
| Tnfsf13b      | 0.013145986 | 1.688338518 | up   |
| Mtvr2         | 0.013153177 | 1.532585263 | up   |
| Traf1         | 0.01315827  | 1.850340962 | up   |
| 2610024E20Rik | 0.013176678 | 1.594546795 | up   |
| A530058L02Rik | 0.013177666 | 1.515235663 | up   |
| Hmha1         | 0.013179728 | 2.101531982 | up   |
| Slc9a3r1      | 0.013180432 | 1.859540224 | up   |
| Cyp26b1       | 0.013187064 | 2.649281502 | down |
| Col23a1       | 0.01324173  | 1.54298389  | up   |
| LOC100044692  | 0.013299187 | 1.716753483 | up   |
| Nub1          | 0.013317319 | 1.562164903 | up   |
| E330009F12Rik | 0.013334495 | 1.571594477 | up   |
| 2310047C04Rik | 0.013387998 | 1.62315023  | up   |
| Gja5          | 0.013416965 | 1.517576218 | up   |
| 2810404I24Rik | 0.013423672 | 1.618174672 | up   |
| Slamf9        | 0.013442528 | 1.585953236 | up   |
| Lrrc45        | 0.013449911 | 1.662959099 | up   |
| LOC100044395  | 0.013476202 | 1.634354711 | down |
| D930050H18Rik | 0.013528965 | 1.533668995 | up   |
| Prdm2         | 0.013548303 | 1.626281858 | up   |
| ARP2          | 0.013554718 | 1.637546659 | up   |
| Eef1a1        | 0.013558084 | 1.946922898 | up   |
| Msc           | 0.013558084 | 1.678006768 | down |
| Map2k6        | 0.013568964 | 1.549019337 | down |
| Angptl4       | 0.013587164 | 1.558562636 | down |
| Rlf           | 0.013608064 | 2.212370157 | down |
| Pthlh         | 0.013628989 | 1.747664928 | down |
| 9430012M22Rik | 0.013665223 | 2.129438877 | up   |
| Stk11         | 0.013702997 | 1.590244532 | up   |
| Pdgfra        | 0.01374491  | 1.625186443 | up   |
| Eif1ad        | 0.013753292 | 1.647574782 | up   |
| Sox21         | 0.013756869 | 1.585513711 | down |
| D930014N22Rik | 0.013772138 | 2.07677412  | up   |
| 9430008C03Rik | 0.01382012  | 1.500455737 | down |
| Cdk3          | 0.013884417 | 1.517178655 | up   |
| Tor1a         | 0.013889653 | 1.500824809 | up   |
| Hbb-b1        | 0.013909161 | 7.77823925  | up   |
| Parg          | 0.013909161 | 1.687676549 | down |
| Tle6          | 0.013939515 | 1.771229625 | up   |
| Dhcr24        | 0.013956518 | 1.919084787 | up   |
| Hddc2         | 0.013964236 | 1.652547717 | down |
| Lcorl         | 0.013981664 | 1.54573679  | up   |
| Nfkbid        | 0.014010639 | 1.532115459 | up   |

|                 |             |             |      |
|-----------------|-------------|-------------|------|
| Ccdc55          | 0.014074417 | 1.528902292 | down |
| Car13           | 0.014078152 | 1.591670752 | down |
| A530089A20Rik   | 0.014092034 | 2.047591209 | down |
| Unc5c           | 0.014135574 | 1.519138575 | down |
| 2700022J23Rik   | 0.01414173  | 1.541285753 | up   |
| Gpr17           | 0.014154808 | 1.712632537 | down |
| Sgcb            | 0.014166679 | 1.52116406  | down |
| Efemp1          | 0.014179253 | 1.692105413 | up   |
| Gins2           | 0.014184191 | 1.851901412 | down |
| Zwilch          | 0.014200673 | 1.548587799 | down |
| Phkb            | 0.014203393 | 1.51730001  | up   |
| Acbd4           | 0.014209136 | 1.532922506 | up   |
| Fubp1           | 0.014217254 | 2.243709564 | down |
| Dct             | 0.014221386 | 1.577306986 | down |
| 2810055F11Rik   | 0.01422507  | 1.637764573 | down |
| Dcc             | 0.014239829 | 1.609910727 | up   |
| Wbp1            | 0.01427663  | 1.587239981 | down |
| 1700029G01Rik   | 0.014286649 | 1.573672772 | up   |
| 2410006H16Rik   | 0.014286649 | 1.615646958 | down |
| Hist1h4f        | 0.014314462 | 1.525634289 | down |
| 4930570C03Rik   | 0.014324252 | 1.598093152 | up   |
| Hist2h2aa1      | 0.014331507 | 1.562488794 | up   |
| Akt1s1          | 0.014368234 | 1.919832826 | up   |
| Mmd2            | 0.014379609 | 1.693962097 | down |
| Vps29           | 0.014383988 | 1.745148897 | down |
| LOC381230       | 0.014404518 | 1.548574686 | up   |
| mt-Nd5          | 0.014421569 | 3.367965698 | up   |
| Polk            | 0.014422618 | 1.579787493 | down |
| 4930545L23Rik   | 0.014455425 | 1.59867847  | down |
| Ubxn8           | 0.014528827 | 1.529180646 | down |
| Utp23           | 0.014547062 | 1.532169223 | down |
| Crebzf          | 0.014557002 | 1.57626915  | down |
| Apobec3         | 0.014573689 | 1.500709653 | down |
| 2610202E01Rik   | 0.01457393  | 1.68234992  | up   |
| St7             | 0.014589873 | 1.763204098 | up   |
| Rars            | 0.014625328 | 1.694197536 | down |
| 2310067B10Rik   | 0.014727488 | 1.686938167 | up   |
| D830014B20Rik   | 0.014750568 | 2.099839687 | down |
| Adam15          | 0.014768669 | 1.615787506 | up   |
| Arrdc4          | 0.014774913 | 2.774963856 | up   |
| D930007M19Rik   | 0.014786349 | 1.95210731  | down |
| Zcchc7          | 0.014799102 | 1.628791809 | up   |
| C430005L07Rik   | 0.014812215 | 1.60780263  | down |
| scl0001464.1_61 | 0.014812215 | 1.60696435  | up   |
| Map3k7ip1       | 0.014823621 | 1.727927208 | down |
| 4833414E09Rik   | 0.014855902 | 3.011304617 | up   |
| 2610104F20Rik   | 0.014893767 | 1.694723845 | up   |
| Nup133          | 0.014899062 | 1.941984773 | up   |
| Lrrc16b         | 0.014913377 | 1.91657424  | up   |
| LOC100044275    | 0.014923816 | 1.643465161 | up   |
| Mta2            | 0.014930181 | 1.63879776  | up   |
| Elf1            | 0.014981337 | 1.564953923 | down |

|               |             |             |      |
|---------------|-------------|-------------|------|
| 4930503L19Rik | 0.015053246 | 1.898484469 | down |
| Nagk          | 0.015056096 | 1.611242652 | up   |
| Mif           | 0.015058579 | 1.607923269 | down |
| Arhgap8       | 0.015098507 | 1.659457803 | up   |
| C130048M12Rik | 0.015098507 | 1.698494554 | down |
| A330089M16Rik | 0.015143639 | 1.646604061 | up   |
| Hsd3b7        | 0.015161737 | 1.660743237 | up   |
| Tmem132a      | 0.015164442 | 1.537937641 | up   |
| LOC638275     | 0.015200235 | 1.821522355 | down |
| Ttc30b        | 0.015223199 | 1.529625416 | down |
| Jmjd1a        | 0.015234897 | 2.485238075 | down |
| 1700021K19Rik | 0.015259022 | 1.645505667 | up   |
| D430005F24Rik | 0.015279185 | 1.732679248 | up   |
| Plxna3        | 0.015290167 | 1.502586842 | down |
| Ttyh1         | 0.015290167 | 2.144072533 | down |
| A530020H22Rik | 0.015300924 | 1.763928652 | up   |
| Jam2          | 0.015325007 | 1.505161285 | down |
| Fn1           | 0.015341385 | 1.853502989 | down |
| LOC547380     | 0.015368923 | 1.820029497 | up   |
| LOC100048105  | 0.015415511 | 1.862961054 | up   |
| Wnt5a         | 0.015419887 | 1.516037941 | down |
| Lrrc50        | 0.015467605 | 1.622580171 | up   |
| 2410012M04Rik | 0.015473281 | 1.502745986 | up   |
| Tap2          | 0.015485013 | 1.890290976 | up   |
| Tbxas1        | 0.015493888 | 1.623475432 | up   |
| EG620119      | 0.015512404 | 2.267612696 | down |
| Eif2s2        | 0.015512404 | 2.120897293 | down |
| LOC674004     | 0.015542697 | 2.86631608  | down |
| Ccnc          | 0.015571334 | 1.713863611 | down |
| Pou6f1        | 0.015609437 | 1.708609581 | up   |
| 2810405F04Rik | 0.015615013 | 2.58091116  | down |
| 4932417I16Rik | 0.015626036 | 1.665560842 | down |
| Plekho2       | 0.015634831 | 1.590256214 | up   |
| Zfp414        | 0.01563769  | 1.552692771 | up   |
| Klc1          | 0.015643211 | 1.50708282  | down |
| Cald1         | 0.015649566 | 1.575563431 | down |
| Polr1e        | 0.015656458 | 1.607215285 | up   |
| Nip7          | 0.015658187 | 1.918694973 | down |
| Nrxn2         | 0.015658187 | 2.02223234  | up   |
| Nhlrc2        | 0.015691295 | 2.091707707 | down |
| LOC100046594  | 0.015709708 | 2.62715888  | down |
| Ppapdc1b      | 0.015752522 | 1.58837533  | down |
| Gp1bb         | 0.015761692 | 1.553402424 | up   |
| B930083E23Rik | 0.015785834 | 2.655101299 | up   |
| Pnpla7        | 0.015787069 | 1.557976604 | up   |
| C730010J01Rik | 0.015796756 | 1.575244904 | up   |
| B930001P03Rik | 0.015804652 | 2.427062988 | up   |
| Pax1          | 0.015903296 | 2.354618549 | up   |
| 6430407L02Rik | 0.015932487 | 1.752454042 | up   |
| Ppnr          | 0.015947174 | 2.886119366 | up   |
| 2610301N02Rik | 0.015954686 | 1.844610453 | down |
| E030026E10Rik | 0.015954686 | 1.524294138 | up   |

|                |             |             |      |
|----------------|-------------|-------------|------|
| Trib2          | 0.015954686 | 1.596457601 | up   |
| Abca7          | 0.015963128 | 1.73140645  | up   |
| Mtmr4          | 0.015986029 | 2.094404936 | up   |
| Mmp23          | 0.016031815 | 1.60755837  | up   |
| scl0003040.1_5 | 0.016046926 | 1.56754911  | down |
| A130076G11Rik  | 0.016089123 | 1.787539244 | up   |
| 5430404G13Rik  | 0.016122658 | 2.256258965 | up   |
| Arid1b         | 0.01616071  | 1.501429915 | up   |
| LOC380925      | 0.016233882 | 1.875408649 | up   |
| Brap           | 0.01624731  | 1.574795961 | up   |
| 2610044O15Rik  | 0.016247973 | 1.609202743 | up   |
| Rad51l3        | 0.016287977 | 1.614845514 | up   |
| A430103D13Rik  | 0.016318915 | 1.575238109 | up   |
| Rmnd5b         | 0.016318915 | 1.510534406 | down |
| Stmn4          | 0.016323222 | 1.638828397 | down |
| Slc39a3        | 0.016325425 | 1.562371969 | up   |
| Slc9a3r2       | 0.016325425 | 1.696235776 | up   |
| Mcf2l          | 0.016343722 | 2.186741591 | up   |
| Nfix           | 0.016355747 | 1.575346112 | down |
| Odz4           | 0.016355747 | 1.744203448 | up   |
| Zfp364         | 0.016362136 | 1.5711689   | up   |
| Hsd3b7         | 0.016396118 | 1.597201347 | up   |
| Bmp1           | 0.016406797 | 1.60881567  | up   |
| Il4ra          | 0.016408974 | 1.881296396 | up   |
| Pi4k2b         | 0.016434064 | 1.550752401 | down |
| 2900009C24Rik  | 0.016480325 | 1.56754005  | up   |
| 2810474O19Rik  | 0.016515521 | 1.764845729 | up   |
| Taf2           | 0.016587799 | 2.381062269 | down |
| D930050A07Rik  | 0.016611183 | 1.571659565 | up   |
| Hist3h2ba      | 0.016619289 | 1.522813439 | up   |
| C87436         | 0.016638862 | 1.850239635 | down |
| A630043I21Rik  | 0.016653638 | 1.529606819 | up   |
| Hprt1          | 0.016661359 | 1.646520376 | down |
| 5830431N17Rik  | 0.016698534 | 1.77746594  | down |
| Chst3          | 0.016758584 | 1.71955502  | down |
| BC022687       | 0.016782846 | 1.665683985 | up   |
| Grk5           | 0.016837573 | 1.684292436 | down |
| Lin54          | 0.016851082 | 1.594561577 | down |
| 1500003O22Rik  | 0.01685659  | 1.575522661 | up   |
| Nomo1          | 0.016863186 | 1.697021246 | up   |
| Nfatc1         | 0.016887963 | 1.625146389 | down |
| Zfp36l1        | 0.016965367 | 2.099901676 | down |
| Snx3           | 0.016969873 | 1.603039861 | down |
| Hoxc13         | 0.017006882 | 2.708408594 | up   |
| Pdzrn3         | 0.017043423 | 1.666963577 | up   |
| Mamdc4         | 0.017105119 | 1.536769629 | up   |
| 1810046J19Rik  | 0.017108837 | 1.519720912 | up   |
| Enpp2          | 0.017148748 | 1.58511591  | down |
| Evi1           | 0.017154278 | 2.067652702 | down |
| 3830431G21Rik  | 0.017192848 | 1.735956073 | up   |
| Hspa4          | 0.01729572  | 1.625148892 | up   |
| D330040H18Rik  | 0.017307824 | 1.860665917 | up   |

|               |             |             |      |
|---------------|-------------|-------------|------|
| Ddx24         | 0.017328613 | 1.511216998 | up   |
| Erg           | 0.017328613 | 1.973852038 | down |
| Pilra         | 0.017328613 | 1.545988321 | up   |
| Zmiz2         | 0.017328613 | 1.840798736 | up   |
| Gas7          | 0.017362045 | 1.776484132 | up   |
| A130020K16Rik | 0.017393217 | 2.07652092  | up   |
| Ercc1         | 0.017423546 | 1.502855539 | up   |
| Hace1         | 0.017443497 | 1.551439762 | down |
| 2900056M20Rik | 0.017461967 | 1.938312531 | up   |
| 6530415H11Rik | 0.017473679 | 1.649091125 | up   |
| 2410022L05Rik | 0.017544065 | 1.528789282 | up   |
| Mll3          | 0.017591413 | 1.502576351 | up   |
| Ptpn1         | 0.017605349 | 1.964437604 | up   |
| 9030223K07Rik | 0.01763395  | 1.717803478 | up   |
| Pigb          | 0.017642314 | 1.893906355 | down |
| Rps6ka4       | 0.01769172  | 1.525422692 | up   |
| Smc5l1        | 0.01769172  | 1.52446115  | up   |
| 9430023L20Rik | 0.017704897 | 1.620031238 | up   |
| Wdr79         | 0.017767321 | 1.513698936 | up   |
| 4932433N03Rik | 0.017805893 | 1.658770084 | up   |
| Wdr86         | 0.0178135   | 1.51345706  | up   |
| LOC100048812  | 0.017882092 | 1.629825354 | up   |
| D330050I23Rik | 0.017897118 | 1.730247259 | down |
| Rogdi         | 0.017897118 | 1.571779966 | up   |
| Fmn2          | 0.017901592 | 1.568500757 | down |
| Alg11         | 0.017913392 | 1.533117533 | down |
| 1500015O10Rik | 0.017942723 | 1.779098392 | down |
| Utx           | 0.017995914 | 1.50602603  | down |
| Mar-11        | 0.018000988 | 1.643353343 | up   |
| Ticam2        | 0.018007113 | 1.565997005 | up   |
| Cchcr1        | 0.018030645 | 1.518537641 | up   |
| 2310014H01Rik | 0.01808024  | 1.539948702 | up   |
| Ccdc66        | 0.01809505  | 1.524603486 | down |
| Mt3           | 0.018117914 | 1.519596338 | down |
| Ascc2         | 0.018134113 | 1.649891019 | down |
| Pfdn5         | 0.018134113 | 1.636819124 | down |
| Rhob          | 0.018134113 | 1.795479775 | up   |
| Nkx2-2        | 0.018138211 | 1.520688176 | up   |
| Ankrd12       | 0.018188709 | 1.690204263 | up   |
| Sh3rf1        | 0.0182072   | 1.549773216 | up   |
| Sgms1         | 0.01821428  | 1.556291699 | down |
| Rab33b        | 0.018244986 | 1.561764956 | up   |
| Zfp160        | 0.018254852 | 1.648348689 | up   |
| LOC100039888  | 0.018267162 | 1.818234801 | up   |
| End3          | 0.018367505 | 1.620908618 | up   |
| 9530083O12Rik | 0.018480251 | 1.879650474 | up   |
| Ctsb          | 0.018484259 | 1.804387212 | up   |
| 2700069A02Rik | 0.018492756 | 1.649939656 | down |
| D930031I08Rik | 0.018492756 | 1.604698181 | up   |
| 4930405A21Rik | 0.018524321 | 1.656266213 | down |
| Aplp1         | 0.018587796 | 1.950808525 | up   |
| Heph          | 0.018628702 | 1.680292487 | down |



|               |             |             |      |
|---------------|-------------|-------------|------|
| Syt5          | 0.018628702 | 1.609662056 | up   |
| Shox2         | 0.018677397 | 2.139605284 | up   |
| Casp6         | 0.018952517 | 1.554134369 | down |
| St8sia2       | 0.019010162 | 1.841214657 | up   |
| E130112N23Rik | 0.019019207 | 1.614276886 | up   |
| Fanca         | 0.019019207 | 1.565289617 | up   |
| 8430438D04Rik | 0.019031048 | 1.877628923 | up   |
| Hbb-b2        | 0.019067744 | 7.270130158 | up   |
| D130019H05Rik | 0.019103719 | 1.624179483 | down |
| Gtf2f1        | 0.019148465 | 1.803111672 | up   |
| Pcdhb6        | 0.019173428 | 1.576027632 | up   |
| Dab2          | 0.019258801 | 1.610951066 | up   |
| LOC238836     | 0.019271161 | 2.153017759 | down |
| EG665685      | 0.01930489  | 1.823449254 | down |
| Fusip1        | 0.01930489  | 1.946251035 | down |
| Arfgef1       | 0.019311925 | 2.161479712 | down |
| Ddx26         | 0.019317096 | 1.613991737 | up   |
| BC003498      | 0.0193453   | 1.520325422 | up   |
| Amigo2        | 0.019347727 | 1.50480473  | up   |
| Foxf1a        | 0.019437868 | 1.569296002 | down |
| Adap2         | 0.019468719 | 1.609261155 | up   |
| 8430436C05Rik | 0.019525684 | 1.844633222 | up   |
| Pcyt1a        | 0.019537203 | 1.650879741 | up   |
| Hbb-b1        | 0.01954609  | 8.318092346 | up   |
| Cfl1          | 0.019548684 | 1.53356874  | up   |
| Pou3f1        | 0.019551167 | 2.063205719 | up   |
| Ints1         | 0.019591827 | 1.566596627 | up   |
| Ddx3y         | 0.019655107 | 3.246217966 | up   |
| 9030607L20Rik | 0.019720452 | 1.899833679 | up   |
| Exosc6        | 0.019747123 | 2.058234215 | up   |
| Pot1b         | 0.019876078 | 2.112498522 | down |
| Syce1         | 0.019920012 | 1.86384666  | up   |
| 2610304O13Rik | 0.019936338 | 2.159354925 | up   |
| Lmo2          | 0.019993877 | 2.961601973 | up   |
| Hmgb1         | 0.02002883  | 2.085407734 | down |
| Dnm3os        | 0.020042723 | 2.063773394 | down |
| Tssc8         | 0.02005334  | 3.236780405 | up   |
| 4833420G11Rik | 0.020088904 | 1.604034543 | down |
| C430004E15Rik | 0.020146139 | 1.56531024  | up   |
| Ncl           | 0.020166822 | 1.689600945 | up   |
| 9430022A07Rik | 0.020187717 | 1.68251133  | up   |
| C230067O06Rik | 0.020236097 | 1.533300757 | down |
| Col1a1        | 0.020236097 | 1.851671577 | up   |
| A630076E03Rik | 0.020296967 | 2.192493677 | up   |
| Tnni2         | 0.020329716 | 1.586446285 | up   |
| 2410018I08Rik | 0.020339169 | 1.556555748 | up   |
| D630047N04Rik | 0.020410717 | 1.625984788 | up   |
| Neurl         | 0.020420333 | 1.822006226 | up   |
| Col25a1       | 0.020420678 | 1.570342064 | down |
| 2700024H10Rik | 0.020474836 | 1.514556646 | up   |
| Plekha2       | 0.020497326 | 2.480962277 | up   |
| Sox11         | 0.020497326 | 1.644564867 | up   |

|               |             |             |      |
|---------------|-------------|-------------|------|
| EG625835      | 0.020504223 | 1.709165573 | up   |
| Ntrk2         | 0.020534083 | 1.564655185 | up   |
| Sox8          | 0.020557594 | 1.502229095 | down |
| LOC236604     | 0.020571385 | 1.52287209  | down |
| 4833406M21Rik | 0.020616537 | 1.994479418 | up   |
| C920027I18Rik | 0.020624859 | 1.566333056 | down |
| B930069K15Rik | 0.020664822 | 1.807218313 | up   |
| Top3b         | 0.020697853 | 1.608972907 | up   |
| Gprasp1       | 0.020699658 | 1.506540656 | down |
| Calm2         | 0.020710791 | 1.700144887 | up   |
| Copg2         | 0.020787496 | 1.639634132 | down |
| 1200016E24Rik | 0.020792129 | 1.565907121 | up   |
| Ybx3          | 0.020792922 | 1.588572502 | up   |
| Arid3b        | 0.020807253 | 1.576095343 | up   |
| 9530007E02Rik | 0.020834299 | 1.500366688 | up   |
| Nol3          | 0.020856412 | 1.673335433 | up   |
| Sec22I3       | 0.020885751 | 1.526977897 | up   |
| B230343A10Rik | 0.020981461 | 1.780857801 | up   |
| Pawr          | 0.021021903 | 1.504055858 | down |
| 0610031J06Rik | 0.021027813 | 1.50747323  | up   |
| Gats          | 0.021061473 | 1.619213224 | up   |
| A530083M17Rik | 0.0211579   | 3.08627677  | up   |
| Hk3           | 0.021170015 | 1.712053299 | up   |
| Hbb-b1        | 0.021201024 | 6.973231792 | up   |
| A530030B07Rik | 0.021343874 | 1.752098799 | up   |
| Cdk5          | 0.021353282 | 1.550286531 | up   |
| Prpf19        | 0.021391664 | 1.56695044  | down |
| Zc3h15        | 0.02140856  | 1.564205051 | up   |
| Nfatc1        | 0.02144479  | 1.971214891 | down |
| Mpp3          | 0.021554269 | 1.537477493 | up   |
| Rnf3          | 0.021592744 | 1.587883592 | up   |
| Atg3          | 0.021593135 | 1.614169955 | down |
| Ift57         | 0.021595502 | 1.671165586 | up   |
| Kcnj2         | 0.021619201 | 2.289093971 | down |
| 4921514E18Rik | 0.021643112 | 1.5726825   | down |
| Lin7c         | 0.02166128  | 1.770914078 | up   |
| LOC637711     | 0.021746695 | 1.544100761 | down |
| Folr1         | 0.021769602 | 1.605981231 | down |
| Rala          | 0.021808939 | 1.733900785 | down |
| Donson        | 0.021835454 | 1.576853991 | down |
| D1Ertd396e    | 0.021948675 | 1.584858179 | up   |
| Il6ra         | 0.021968354 | 1.728919029 | up   |
| 9930033D15Rik | 0.021988338 | 1.518664122 | up   |
| Tnnc1         | 0.022033962 | 1.757799506 | up   |
| 3632413B07Rik | 0.022292096 | 1.672812343 | up   |
| 2810008D09Rik | 0.022395229 | 1.630763769 | up   |
| Tmbim6        | 0.02252706  | 1.648805022 | up   |
| Anapc7        | 0.022578396 | 1.560350776 | up   |
| Dusp5         | 0.022610087 | 1.514411569 | up   |
| 4632415K11Rik | 0.022809174 | 1.523635864 | up   |
| Tppp3         | 0.022973267 | 1.515937686 | up   |
| LOC100046608  | 0.022979464 | 1.908893704 | down |

|                   |             |             |      |
|-------------------|-------------|-------------|------|
| A730058G16Rik     | 0.022985704 | 1.822143912 | up   |
| 2810410A03Rik     | 0.023044504 | 1.518968225 | up   |
| H3f3b             | 0.023090782 | 1.533421636 | up   |
| Actn2             | 0.023095578 | 1.730810285 | up   |
| Arglu1            | 0.023095578 | 1.500149727 | up   |
| BC026590          | 0.023128154 | 1.706980825 | up   |
| Ints12            | 0.023156676 | 1.654516935 | down |
| Tcf20             | 0.023161488 | 1.50092411  | down |
| Cdk7              | 0.023165254 | 1.786380172 | up   |
| Narg3             | 0.023167392 | 1.578389168 | up   |
| Trp53inp2         | 0.023167392 | 1.553473353 | up   |
| Sipa1             | 0.023201779 | 1.59102416  | up   |
| Meis3             | 0.023320233 | 1.669393897 | up   |
| Il17rc            | 0.023322796 | 1.622000933 | up   |
| Serinc5           | 0.023345973 | 1.672164798 | up   |
| C430048L16Rik     | 0.023377892 | 1.643749237 | up   |
| Clec7a            | 0.023394242 | 1.532199383 | up   |
| Nfkb1             | 0.023435246 | 1.889028788 | up   |
| Ptprz1            | 0.023490856 | 2.008227348 | down |
| Rragb             | 0.023499509 | 1.565858841 | down |
| 3110056O03Rik     | 0.023512038 | 1.504541755 | up   |
| Gm784             | 0.023539327 | 1.975931406 | down |
| Seh1l             | 0.023612496 | 1.78618741  | down |
| Fat3              | 0.023772512 | 1.660501838 | up   |
| A330083M20Rik     | 0.023837352 | 1.585550785 | up   |
| LOC664956         | 0.023872476 | 1.618780375 | up   |
| LOC669660         | 0.023903126 | 1.801057577 | down |
| 9430091N11Rik     | 0.023923457 | 3.282517672 | up   |
| Neurog2           | 0.023983184 | 3.451078653 | down |
| D030073C20Rik     | 0.024037    | 1.635189056 | up   |
| Ttc13             | 0.024050135 | 1.60121882  | up   |
| Wnt9a             | 0.024064122 | 1.56685245  | up   |
| scl0001860.1_2694 | 0.024070205 | 1.572082043 | up   |
| Nfic              | 0.024165949 | 1.547176957 | up   |
| C030044B11Rik     | 0.024186941 | 1.757001281 | down |
| Myl9              | 0.024218453 | 1.544612289 | down |
| RbmX              | 0.024218453 | 1.797032952 | down |
| Tbx18             | 0.024300017 | 1.522234917 | up   |
| D230017C05Rik     | 0.024374018 | 2.547896147 | up   |
| Hexim1            | 0.024374289 | 1.911100388 | up   |
| Limd2             | 0.024429301 | 1.720597744 | up   |
| Nelf              | 0.024429301 | 1.501473069 | up   |
| Ncstn             | 0.024458835 | 1.723075628 | down |
| Lsamp             | 0.024467398 | 1.558461189 | down |
| Ube2e3            | 0.024551753 | 2.235800743 | up   |
| Gps2              | 0.024673687 | 1.501157522 | up   |
| C630030A18Rik     | 0.024702463 | 1.8217026   | up   |
| Myh3              | 0.024714334 | 1.999429107 | up   |
| Tmem166           | 0.024791537 | 1.628471971 | down |
| Pabpc4            | 0.024886003 | 1.559286594 | down |
| 5430431D22Rik     | 0.024960838 | 1.637160063 | up   |
| 9630005C17Rik     | 0.024963278 | 1.675758958 | up   |

|               |             |             |      |
|---------------|-------------|-------------|------|
| Gpr107        | 0.025039872 | 1.63171351  | up   |
| Ube2g1        | 0.025054282 | 1.639479637 | down |
| 2410004N09Rik | 0.025077798 | 1.639373064 | up   |
| 6430403C09Rik | 0.025133722 | 1.556881785 | up   |
| Arhgap24      | 0.025214126 | 1.706454039 | down |
| Rbm42         | 0.025283694 | 1.538809776 | up   |
| 2610028L16Rik | 0.025288999 | 2.36195302  | up   |
| 0610006I08Rik | 0.025402693 | 1.700408459 | down |
| A430103B12Rik | 0.025592184 | 2.176637173 | up   |
| Ankrd34a      | 0.025592184 | 1.72562778  | down |
| Dusp26        | 0.025719157 | 2.14577961  | up   |
| D830031G23Rik | 0.025781283 | 1.941155791 | up   |
| Gpm6a         | 0.025784677 | 2.084709644 | down |
| Nfic          | 0.025964795 | 1.620805621 | up   |
| mtDNA_COXI    | 0.026019203 | 2.043129921 | down |
| Ankra2        | 0.026019333 | 1.632736206 | down |
| P4ha2         | 0.026029255 | 1.98194623  | down |
| 4832408C21Rik | 0.026202362 | 3.687877655 | up   |
| Trpv2         | 0.02621866  | 1.634125352 | up   |
| 6720470G16Rik | 0.026288547 | 2.175667286 | up   |
| EG333830      | 0.026339775 | 1.512492538 | up   |
| Trio          | 0.026358793 | 1.6330235   | down |
| Trps1         | 0.026364725 | 2.25335002  | down |
| Arl5b         | 0.026375158 | 1.855834484 | up   |
| Snip1         | 0.026404629 | 1.606954336 | down |
| Frk           | 0.026437875 | 1.751980543 | up   |
| Tnfrsf12a     | 0.026474221 | 1.520322204 | down |
| Bcor          | 0.026485315 | 1.556888342 | down |
| Ncam1         | 0.026524995 | 1.675677061 | up   |
| Tbl3          | 0.026624341 | 1.593612194 | up   |
| D030074E01Rik | 0.026653454 | 1.585466862 | down |
| LOC433464     | 0.026796611 | 1.507876635 | down |
| Fnip1         | 0.026804889 | 1.518992543 | down |
| Sh3bgrl       | 0.026836412 | 2.048965693 | down |
| Fam20b        | 0.027013743 | 1.650509834 | down |
| E130014J05Rik | 0.027047353 | 1.601880193 | up   |
| MALT-1        | 0.027127458 | 1.655619621 | up   |
| EG277333      | 0.027219711 | 1.652448535 | up   |
| Slit2         | 0.027277453 | 2.072291613 | up   |
| Cldn4         | 0.027371962 | 1.552918911 | down |
| A830006J06Rik | 0.02738763  | 2.073411703 | up   |
| Rnd2          | 0.027398052 | 2.877049685 | down |
| Kcnma1        | 0.027493293 | 2.169963598 | up   |
| Cyfp2         | 0.027529674 | 1.96624136  | up   |
| Cap1          | 0.027537964 | 1.58344388  | up   |
| 6030436C20Rik | 0.027550042 | 1.823342323 | up   |
| 8030466E21Rik | 0.027557021 | 1.747817874 | up   |
| A530076E23Rik | 0.027641369 | 1.635259271 | up   |
| Diablo        | 0.027699878 | 1.572608233 | up   |
| Rev3l         | 0.027733464 | 1.678638935 | down |
| LOC100045054  | 0.027746508 | 1.642021298 | up   |
| Atp6v0c       | 0.027829561 | 1.907900691 | down |

|               |             |             |      |
|---------------|-------------|-------------|------|
| Hspa8         | 0.027860519 | 1.590014458 | up   |
| Panx3         | 0.02788059  | 2.619599581 | down |
| Slit3         | 0.02788059  | 2.003383637 | up   |
| A430073A17Rik | 0.02815743  | 1.623515129 | up   |
| Tmem63b       | 0.028199595 | 1.592990995 | up   |
| 8030479D07Rik | 0.028224614 | 2.156710148 | up   |
| 1810026B05Rik | 0.028257683 | 2.077821255 | up   |
| LOC238943     | 0.028294431 | 1.941467166 | down |
| 1110033K02Rik | 0.028332705 | 1.563651204 | up   |
| Ankrd10       | 0.028453095 | 1.543887615 | up   |
| Dlst          | 0.028590931 | 1.62280333  | up   |
| Usp47         | 0.028646117 | 1.575356126 | down |
| Ank3          | 0.028652705 | 1.608907938 | up   |
| Pak3          | 0.028678091 | 1.949670911 | down |
| Tbx5          | 0.028805319 | 1.863815188 | up   |
| Tmco3         | 0.028866852 | 1.513917327 | down |
| EG433923      | 0.028954901 | 1.783436179 | down |
| Fto           | 0.028977204 | 1.872379541 | up   |
| Star          | 0.029008696 | 1.60982573  | up   |
| Mkln1         | 0.02902166  | 1.524707913 | up   |
| Cndp2         | 0.029028013 | 1.714619279 | up   |
| Ncdn          | 0.029063145 | 1.599232435 | up   |
| Aebp2         | 0.029099127 | 1.500701666 | down |
| F730003H07Rik | 0.029329818 | 1.620857835 | up   |
| 2900040J22Rik | 0.029390939 | 1.792720914 | up   |
| A630098G22Rik | 0.029500375 | 1.568632245 | down |
| 6720464F23Rik | 0.029634349 | 2.279848814 | up   |
| Nasp          | 0.029696375 | 1.817962408 | down |
| Mll3          | 0.029732732 | 1.535362482 | up   |
| Mef2c         | 0.029764548 | 1.61142087  | down |
| Dct           | 0.029809175 | 1.660903931 | down |
| AW228700      | 0.029932546 | 1.543149471 | up   |
| 2410025L10Rik | 0.029970994 | 1.600186348 | up   |
| C330006P03Rik | 0.030145994 | 1.623881459 | up   |
| Csf1          | 0.030208422 | 1.510946751 | up   |
| LOC100047888  | 0.030216232 | 1.571417809 | up   |
| Thbs2         | 0.030375907 | 1.530437708 | down |
| Rbm3          | 0.030448498 | 1.754942536 | down |
| Atrnl1        | 0.030655773 | 1.593916178 | up   |
| Ncoa6         | 0.030689774 | 1.53946197  | down |
| 1110033F14Rik | 0.030838693 | 1.528321624 | up   |
| N6amt2        | 0.030867657 | 1.640986919 | up   |
| Robo2         | 0.031276278 | 1.660531163 | up   |
| 2810427C15Rik | 0.031342957 | 2.818995953 | up   |
| 2510006D16Rik | 0.031394586 | 1.582388759 | up   |
| Cntnap2       | 0.031414226 | 2.22788167  | down |
| Gria1         | 0.031559862 | 1.693127275 | up   |
| C230037E05Rik | 0.031613197 | 2.078089237 | up   |
| Birc1cl       | 0.031911936 | 2.208615303 | up   |
| Setd1b        | 0.03197594  | 1.561620235 | up   |
| A130022J21Rik | 0.032255564 | 1.541298509 | up   |
| 1810017N16Rik | 0.032534637 | 1.51070416  | up   |

|               |             |             |      |
|---------------|-------------|-------------|------|
| A630076G18Rik | 0.032597665 | 1.596131206 | up   |
| 0610030E20Rik | 0.032646209 | 1.60135591  | up   |
| Stub1         | 0.032783683 | 1.637759924 | up   |
| Abca8a        | 0.032802887 | 1.678803086 | down |
| 3110006E14Rik | 0.032907706 | 2.02323246  | up   |
| Tgfbrap1      | 0.032907706 | 1.606859326 | up   |
| E130202F10Rik | 0.032930646 | 2.224581003 | up   |
| E030040P03Rik | 0.032961104 | 2.07277298  | up   |
| 6720407G21Rik | 0.033149082 | 1.680956841 | up   |
| E230008O15Rik | 0.033264656 | 1.666207671 | up   |
| Serpini1      | 0.033286374 | 1.65614605  | down |
| Sep-07        | 0.033388555 | 1.666994572 | up   |
| 2610005M20Rik | 0.033453487 | 1.878376484 | up   |
| 3110073H01Rik | 0.03346042  | 1.632067561 | up   |
| 1810009N02Rik | 0.033490706 | 2.322052956 | down |
| Map4k3        | 0.033566035 | 1.625558496 | down |
| Pfdn2         | 0.033582468 | 1.515936256 | down |
| B230340J04Rik | 0.033624612 | 1.618609786 | up   |
| Cpt1b         | 0.033880871 | 1.549491048 | up   |
| D130032J17Rik | 0.034177993 | 2.362062454 | up   |
| 5730437P09Rik | 0.034241017 | 1.573449731 | up   |
| Neo1          | 0.034292344 | 1.652311444 | down |
| Errfi1        | 0.034536801 | 1.543256164 | down |
| lfrd1         | 0.034575649 | 1.517557621 | up   |
| Psmc1         | 0.034588281 | 3.174249888 | down |
| A930005G04Rik | 0.034599535 | 1.684175611 | up   |
| 2810405J23Rik | 0.034669712 | 1.725699186 | up   |
| Gadd45g       | 0.034689002 | 1.811520219 | down |
| Sema6d        | 0.034857102 | 1.505709171 | down |
| Egln1         | 0.034872085 | 1.570039034 | down |
| Prrx1         | 0.034901623 | 1.689611316 | up   |
| LOC100047082  | 0.034981057 | 1.764771342 | up   |
| Ptpn11        | 0.035001047 | 1.524289727 | up   |
| Tnfrsf25      | 0.035066426 | 1.600338817 | up   |
| LOC100047619  | 0.035223246 | 1.56867981  | up   |
| 6330439K17Rik | 0.035393234 | 1.524117827 | up   |
| Mylk          | 0.035394479 | 1.881766915 | up   |
| 5830474E16Rik | 0.035454564 | 1.558140993 | up   |
| Rplp0         | 0.035475109 | 1.567043781 | up   |
| Slc11a2       | 0.035735555 | 1.519895315 | up   |
| Ube2g1        | 0.03584398  | 1.518849611 | down |
| Barx2         | 0.035974573 | 1.63368845  | down |
| Rnf19a        | 0.036178503 | 1.57252264  | down |
| A130038M19Rik | 0.036188681 | 1.615169048 | up   |
| Nol5          | 0.036427368 | 2.087093353 | down |
| Irf3          | 0.036456235 | 1.624799252 | up   |
| Ccnb1         | 0.036632683 | 1.616141439 | down |
| Gs2na-pending | 0.036729287 | 1.814650774 | up   |
| Preb          | 0.036734916 | 1.568970919 | up   |
| 9430047F21Rik | 0.037352588 | 2.104152918 | up   |
| Metrn         | 0.037425973 | 1.586075902 | down |
| Dhx9          | 0.037614767 | 1.612222552 | down |

|               |             |             |      |
|---------------|-------------|-------------|------|
| 2900072G11Rik | 0.037677776 | 1.634542227 | up   |
| A130082N24Rik | 0.037837055 | 1.627068996 | down |
| LOC100043796  | 0.038071685 | 1.638041616 | down |
| A630006M12Rik | 0.03809797  | 1.618706346 | up   |
| Isoc2a        | 0.038104817 | 3.079586029 | down |
| Scamp5        | 0.038104817 | 1.893077731 | up   |
| LOC433886     | 0.038219925 | 1.539492965 | up   |
| Camk2n1       | 0.038539704 | 1.784862399 | up   |
| 4833431D13Rik | 0.038543578 | 1.724560738 | up   |
| 5430416B10Rik | 0.038580053 | 1.578135252 | up   |
| Foxp4         | 0.038634628 | 1.508641601 | up   |
| 4832406H04Rik | 0.038729668 | 1.837097764 | up   |
| Gne           | 0.038805187 | 1.598900795 | up   |
| E130001M03Rik | 0.038833767 | 1.500621676 | up   |
| Olig1         | 0.038884744 | 2.554029942 | down |
| Cpsf6         | 0.039143845 | 1.602885008 | up   |
| 2700017A04Rik | 0.039159138 | 1.956477404 | up   |
| Lman2         | 0.03927388  | 1.697033286 | up   |
| T             | 0.039372377 | 1.527101755 | down |
| Robo2         | 0.039584518 | 1.523898602 | up   |
| 2700023E23Rik | 0.039628856 | 1.67825532  | down |
| E030019B13Rik | 0.039729506 | 2.561062813 | up   |
| 4930549G23Rik | 0.039787475 | 1.924414992 | down |
| AA410130      | 0.039826572 | 2.39052105  | up   |
| Bmi1          | 0.039895792 | 1.615434647 | down |
| Vmn2r-ps14    | 0.040216472 | 1.522837281 | up   |
| mtDNA_ND1     | 0.040286411 | 2.364932776 | down |
| D930044I17Rik | 0.040380888 | 2.030469656 | up   |
| 6430519N07Rik | 0.040653825 | 2.722062349 | up   |
| Gjb6          | 0.040720016 | 1.630724073 | down |
| Cep70         | 0.040905979 | 1.532244563 | down |
| LOC674706     | 0.040905979 | 1.763733387 | down |
| Kif21a        | 0.040952981 | 2.176335573 | down |
| Prss12        | 0.040958647 | 1.692567229 | up   |
| Fbxo9         | 0.041259948 | 1.525456071 | down |
| C130002K18Rik | 0.041261639 | 1.730988503 | up   |
| 9430010O03Rik | 0.041395664 | 1.658296704 | up   |
| 9430076C15Rik | 0.041396719 | 1.569241166 | up   |
| A130086G11Rik | 0.041399073 | 1.527243018 | up   |
| Cyb561d1      | 0.041399073 | 1.718616605 | up   |
| Robo1         | 0.041551508 | 1.563209176 | down |
| 3110045A19Rik | 0.041559041 | 1.518151641 | up   |
| Copb1         | 0.041605596 | 1.720616341 | up   |
| Akap9         | 0.042103283 | 1.569421291 | up   |
| 2610008J04Rik | 0.042120453 | 1.675324678 | up   |
| 2310061A09Rik | 0.042130537 | 1.69962883  | up   |
| Kif21b        | 0.042145066 | 1.962554336 | up   |
| Znhit3        | 0.042183068 | 1.626163244 | down |
| C530050I23Rik | 0.042409398 | 1.620764375 | up   |
| Pik3r2        | 0.042504042 | 1.899691224 | up   |
| D230020C06Rik | 0.042762451 | 1.946179628 | up   |
| Antxr1        | 0.042907596 | 1.62461102  | up   |

|               |             |             |      |
|---------------|-------------|-------------|------|
| 6720477C19Rik | 0.043008782 | 2.319058657 | up   |
| Polr1a        | 0.043021828 | 1.573827148 | up   |
| Peg10         | 0.043026082 | 1.547018647 | down |
| Zfp330        | 0.043126062 | 1.561439037 | down |
| Rgmb          | 0.043142051 | 1.638943791 | down |
| Gga1          | 0.04315066  | 1.553385496 | up   |
| Crkl          | 0.043219473 | 1.66804862  | down |
| Hsph1         | 0.043262195 | 1.553467989 | up   |
| Tmeff1        | 0.043439072 | 1.516194105 | down |
| Cox5b         | 0.043531373 | 1.542535543 | down |
| Cplx2         | 0.043664724 | 1.727807164 | down |
| Atp5c1        | 0.043669101 | 1.586648583 | down |
| Klf6          | 0.04372691  | 1.667094708 | up   |
| C130092E12    | 0.043761618 | 2.08492446  | down |
| Npy           | 0.043897752 | 1.62522614  | up   |
| Lhx9          | 0.043975215 | 1.511396647 | down |
| Sfmbt2        | 0.044018816 | 1.556919575 | up   |
| Ube2j1        | 0.044270452 | 1.680078983 | up   |
| 9530009M10Rik | 0.044360209 | 1.612905264 | up   |
| Ust           | 0.044363979 | 1.561433435 | up   |
| 2510009E07Rik | 0.044492364 | 1.914743543 | down |
| Dhx9          | 0.044631109 | 1.802828074 | down |
| 2210410E06Rik | 0.044723138 | 1.522418141 | down |
| Mitd1         | 0.044723138 | 1.593602657 | down |
| E330020G21Rik | 0.044845425 | 2.537300825 | up   |
| Ankmy2        | 0.045014925 | 1.558947444 | up   |
| B130066H02Rik | 0.045014925 | 1.963836074 | up   |
| 9930013M16Rik | 0.045237709 | 1.518592596 | up   |
| D630050H08Rik | 0.045465723 | 1.550317645 | up   |
| Ahsa2         | 0.045551706 | 1.585852623 | up   |
| Hoxb2         | 0.045596853 | 1.554855585 | up   |
| E230012J19Rik | 0.045630492 | 2.144312143 | up   |
| E030017D19Rik | 0.045635484 | 1.569161058 | up   |
| Dnajc2        | 0.045722172 | 1.603770137 | down |
| Nktr          | 0.045890831 | 3.003704071 | up   |
| 5033413D16Rik | 0.045922305 | 2.17121315  | down |
| Nid1          | 0.045947753 | 1.646505833 | up   |
| Atad1         | 0.046240527 | 1.623005867 | down |
| Purb          | 0.046308126 | 1.584069729 | up   |
| Ky            | 0.046456207 | 1.654770613 | up   |
| D130062J21Rik | 0.04669074  | 1.523625374 | up   |
| Hoxd12        | 0.046815649 | 1.629961252 | up   |
| Gria2         | 0.04682434  | 1.619322181 | down |
| Atn1          | 0.046924945 | 1.50362432  | up   |
| 4930588G05Rik | 0.047056787 | 1.631296635 | up   |
| 9530019H20Rik | 0.047157411 | 1.544849038 | up   |
| Tbx4          | 0.047717989 | 1.557803273 | up   |
| Ubg           | 0.047785584 | 1.672635078 | up   |
| Samd8         | 0.04783364  | 1.525051951 | up   |
| A430090L17Rik | 0.047857635 | 2.162659884 | up   |
| Dyrk3         | 0.048358429 | 1.503773332 | down |
| LOC100048105  | 0.048589252 | 1.550920487 | up   |



|               |             |             |      |
|---------------|-------------|-------------|------|
| H2-D1         | 0.048720013 | 1.83630383  | up   |
| Olig2         | 0.048772559 | 1.505360365 | up   |
| 6230415M23Rik | 0.048825152 | 1.565640688 | up   |
| Ncdn          | 0.048962172 | 1.638199449 | up   |
| LOC100048020  | 0.049430102 | 1.550496936 | up   |
| St8sia4       | 0.049651053 | 2.122776032 | up   |
| Tns3          | 0.049662456 | 1.662731886 | down |
| 1110037P13Rik | 0.04981003  | 1.619341135 | up   |
| AI504432      | 0.049942296 | 1.520092845 | down |
|               |             |             |      |

Table 2 (5 pages)

| No. | Probe                | Expression Pattern Observed              |
|-----|----------------------|------------------------------------------|
| 1   | <i>Cytl1</i>         | 1. Fore Limb                             |
|     |                      | 2. Hind Limb                             |
|     |                      | 3. Snout (Follicles of Vibrissae)        |
|     |                      | 4. Basioccipital Bone                    |
|     |                      | 5. Ganglia                               |
|     |                      | 6. Nasal Cavity                          |
|     |                      | 7. Lungs                                 |
|     |                      | 8. Neural Tissue                         |
|     |                      | 9. Brain                                 |
|     |                      | 10. Eye                                  |
|     |                      | 11. Gut                                  |
|     |                      | 12. Liver                                |
| 2   | <i>Prelp</i>         | 1. Tail Cartilage                        |
|     |                      | 2. Mid, Hind Brain                       |
|     |                      | 3. Vertebra Cartilage                    |
|     |                      | 4. Lungs                                 |
|     |                      | 5. Fore Limb                             |
|     |                      | 6. Hind Limb                             |
|     |                      | 7. Humerus/Femur Primordia               |
|     |                      | 8. Rib Cartilage                         |
|     |                      | 9. Neural Tube                           |
|     |                      | 10. Meckel's Cartilage                   |
|     |                      | 11. Vertebral Disc                       |
|     |                      | 12. Surrounding Vertebrae                |
|     |                      | 13. Notochord                            |
| 3   | <i>3110079O15Rik</i> | 1. Basioccipital Bone (Clivus) Cartilage |
|     |                      | 2. Fore Limb Humerus Cartilage           |
|     |                      | 3. Vertebra Cartilage                    |
|     |                      | 4. Rib Cartilage                         |
|     |                      | 5. Hind Limb Femur Cartilage             |
|     |                      | 6. Eye                                   |
|     |                      | 7. Notochord                             |
| 4   | <i>Mia1</i>          | 1. Neural Tissue                         |
|     |                      | 2. Ganglia                               |
|     |                      | 3. Mid, Fore, Hind Brain                 |
|     |                      | 4. Lungs                                 |
|     |                      | 5. Rib Cartilage                         |
|     |                      | 6. Gut                                   |
|     |                      | 7. Follicles of Vibrissae                |
| 5   | <i>Hapln1</i>        | 1. Basioccipital Bone (Clivus) Cartilage |
|     |                      | 2. Nasal Cartilage                       |
|     |                      | 3. Vertebra Cartilage                    |
|     |                      | 4. Humerus                               |
|     |                      | 5. Meckel's Cartilage                    |
|     |                      | 6. Hyoid Bone                            |
|     |                      | 7. Temporal Bone                         |
|     |                      | 8. Ribs                                  |
|     |                      | 9. Femur                                 |

|    |                |                        |
|----|----------------|------------------------|
|    |                | 10. Fore, Hind Limb    |
|    |                | 11. Fore Brain         |
|    |                | 12. Neural Tube        |
|    |                | 13. Notochord          |
| 6  | <i>Hbb-bh1</i> | 1. Liver               |
|    |                | 2. Neural Tissue       |
|    |                | 3. Genitals            |
|    |                | 4. Tongue              |
|    |                | 5. Hind Limb           |
|    |                | 6. Ganglia             |
|    |                | 7. Gut                 |
|    |                | 8. Brain               |
|    |                | 9. Fore Limb           |
|    |                | 10. Eye                |
| 7  | <i>Cbln1</i>   | 1. Neural Tissue       |
|    |                | 2. Dorsal Root Ganglia |
|    |                | 3. Nasal Cavity        |
|    |                | 4. Tongue              |
|    |                | 5. Gonads              |
|    |                | 6. Genitals            |
|    |                | 7. Lungs               |
|    |                | 8. Liver               |
|    |                | 9. Gut                 |
| 8  | <i>Ms4a6d</i>  | 1. Non-localized       |
|    |                | 2. Clavicle            |
|    |                | 3. Brain               |
|    |                | 4. Gut                 |
|    |                | 5. Neural Tissue       |
|    |                | 6. Ganglia             |
|    |                | 7. Eye                 |
| 9  | <i>Mpeg1</i>   | 1. Interdigital        |
|    |                | 2. Non-specific        |
|    |                | 3. Liver               |
| 10 | <i>Csf1r</i>   | 1. Non-localized       |
|    |                | 2. Fore Brain          |
|    |                | 3. Interdigital        |
|    |                | 4. Genitals            |
|    |                | 5. Liver               |
| 11 | <i>Tyrobp</i>  | 1. Non-localized       |
|    |                | 2. Clavicle            |
| 12 | <i>Col10a1</i> | 1. Eye                 |
|    |                | 2. Fore, Hind Limb     |
|    |                | 3. Liver               |
|    |                | 4. Gut                 |
|    |                | 5. Humerus             |
|    |                | 6. Fore, Hind Brain    |
|    |                | 7. Ribs                |
|    |                | 8. Gonads              |
|    |                | 9. Genitals            |

|    |               |                               |
|----|---------------|-------------------------------|
|    |               | 10. Lungs                     |
|    |               | 11. Heart                     |
|    |               | 12. Ganglia                   |
|    |               | 13. Fore, Hind Limb Bones     |
| 13 | <i>St18</i>   | 1. Fore, Mid, Hind Brain      |
|    |               | 2. Dorsal Root Ganglia        |
|    |               | 3. Upper Palate               |
|    |               | 4. Neural Tissue              |
|    |               | 5. Trigeminal Ganglion        |
| 14 | <i>Shox2</i>  | 1. Upper Palate               |
|    |               | 2. Mid, Hind Brain            |
|    |               | 3. Neural Tissue              |
|    |               | 4. Vestibulocochlear Ganglion |
|    |               | 5. Trigeminal Ganglion        |
|    |               | 6. Dorsal Root Ganglion       |
|    |               | 7. Genitals                   |
|    |               | 8. Fore, Hind Limb            |
|    |               | 9. Inter-digital Region       |
|    |               | 10. Eye                       |
|    |               | 11. Nasal Cavity              |
| 15 | <i>Nfib</i>   | 1. Fore, Mid, Hind Brain      |
|    |               | 2. Genitals                   |
|    |               | 3. Neural Tissue              |
|    |               | 4. Lungs                      |
|    |               | 5. Upper Palate               |
| 16 | <i>Hoxb9</i>  | 1. Neural Tissue              |
|    |               | 2. Limbs                      |
|    |               | 3. Widespread                 |
| 17 | <i>Nfatc1</i> | 1. Fore, Mid, Hind Brain      |
|    |               | 2. Neural Tissue              |
|    |               | 3. Genitals                   |
| 18 | <i>E2f6</i>   | 1. Brain                      |
|    |               | 2. Vertebrae                  |
|    |               | 3. Tongue                     |
|    |               | 4. Gut                        |
|    |               | 5. Neural Tissue              |
|    |               | 6. Liver                      |
|    |               | 7. Lungs                      |
|    |               | 8. Genitals                   |
| 19 | <i>Pbx3</i>   | 1. Neural Tissue              |
|    |               | 2. Brain                      |
|    |               | 3. Ganglia                    |
|    |               | 4. Gut                        |
|    |               | 5. Nasal Cavity               |
|    |               | 6. Tongue                     |
|    |               | 7. Limbs                      |
|    |               | 8. Forelimb Bud               |
| 20 | <i>Sox6</i>   | 1. Temporal Bone              |
|    |               | 2. Brain                      |

|    |                |                                  |
|----|----------------|----------------------------------|
|    |                | 3. Genitals                      |
|    |                | 4. Lungs                         |
|    |                | 5. Humerus                       |
|    |                | 6. Femur                         |
|    |                | 7. Fore Limb                     |
|    |                | 8. Nasal Cavity                  |
|    |                | 9. Vertebrae                     |
|    |                | 10. Ribs                         |
|    |                | 11. Dorsal Root Ganglia          |
| 21 | <i>Sox5</i>    | 1. Nasal Cartilage               |
|    |                | 2. Vertebra Cartilage            |
|    |                | 3. Rib Cartilage                 |
|    |                | 4. Tail Cartilage                |
|    |                | 5. Meckel's/Tooth Cartilage      |
|    |                | 6. Ganglia                       |
|    |                | 7. Gut                           |
|    |                | 8. Fore, Mid, Hind Brain         |
|    |                | 9. Follicles of Vibrissae        |
|    |                | 10. Fore, Hind Limb              |
|    |                | 11. Lungs                        |
|    |                | 12. Neural Tube (Transverse)     |
| 22 | <i>Runx1</i>   | 1. Fore, Mid, Hind Brain         |
|    |                | 2. Lungs                         |
|    |                | 3. Dorsal Root Ganglia           |
|    |                | 4. Clavicle                      |
|    |                | 5. Neural Tissue                 |
|    |                | 6. Gut                           |
|    |                | 7. Tongue                        |
|    |                | 8. Liver                         |
|    |                | 9. Nasal Region                  |
|    |                | 10. Eye                          |
| 23 | <i>Tle1</i>    | 1. Brain                         |
|    |                | 2. Trigeminal Ganglion           |
|    |                | 3. Neural Tissue                 |
|    |                | 4. Limbs (Surrounding Cartilage) |
|    |                | 5. Eye                           |
|    |                | 6. Tail (Surrounding Cartilage)  |
|    |                | 7. Lungs                         |
|    |                | 8. Follicles of Vibrissae        |
|    |                | 9. Dorsal Root Ganglion          |
| 24 | <i>Matn4</i>   | 1. Hind Limb                     |
|    |                | 2. Meckel's Cartilage            |
|    |                | 3. Ribs                          |
|    |                | 4. Vertebrae                     |
|    |                | 5. Femur                         |
|    |                | 6. Temporal Bone                 |
|    |                | 7. Lungs                         |
|    |                | 8. Fore Brain                    |
| 25 | <i>Tsc22d1</i> | 1. Hind Limb                     |

|  |  |                           |
|--|--|---------------------------|
|  |  | 2. Fore Limb              |
|  |  | 3. Brain                  |
|  |  | 4. Neural Tissue          |
|  |  | 5. Lungs                  |
|  |  | 6. Cranio-facial Region   |
|  |  | 7. Follicles of Vibrissae |
|  |  | 8. Dorsal Root Ganglia    |
|  |  | 9. Trigeminal Ganglion    |
|  |  |                           |







Table S4 Sox5 (2 pages)

| Gene      | Microarray           |            | Chip-Seq            |                            |                        | Association |
|-----------|----------------------|------------|---------------------|----------------------------|------------------------|-------------|
|           | Fold Change Absolute | Regulation | Chip-Seq tags count | Fold enrichment over input | Distance from TSS (bp) |             |
| Ing4      | 1.6                  | up         | 39                  | 6.9                        | -41                    | TSS         |
| Ing4      | 1.8                  | up         | 39                  | 6.9                        | -41                    | TSS         |
| Magi1     | 1.9                  | up         | 56                  | 8.9                        | -72                    | TSS         |
| Mtf2      | 2.3                  | down       | 32                  | 9.0                        | -138                   | TSS         |
| Gipc1     | 1.6                  | up         | 30                  | 7.8                        | -154                   | TSS         |
| Pin4      | 3.6                  | down       | 44                  | 12.5                       | -181                   | TSS         |
| Chchd3    | 1.6                  | up         | 53                  | 18.5                       | 262                    | TSS         |
| Laptm4a   | 2.1                  | up         | 24                  | 8.4                        | 319                    | TSS         |
| Sox5      | 4.6                  | down       | 118                 | 35.6                       | 567                    | TSS         |
| Sox5      | 6.4                  | down       | 118                 | 35.6                       | 567                    | TSS         |
| Sox5      | 2.3                  | down       | 118                 | 35.6                       | 567                    | TSS         |
| Sox5      | 1.9                  | down       | 118                 | 35.6                       | 567                    | TSS         |
| Magi1     | 1.9                  | up         | 28                  | 9.4                        | -593                   | TSS         |
| Maf       | 1.7                  | up         | 31                  | 4.7                        | 1180                   | promoter    |
| Sort1     | 1.6                  | up         | 41                  | 10.9                       | -1504                  | promoter    |
| Sort1     | 1.6                  | up         | 41                  | 10.9                       | -1504                  | promoter    |
| Ccdc6     | 3.4                  | down       | 26                  | 6.2                        | -1807                  | promoter    |
| Gpsm3     | 1.5                  | up         | 179                 | 30.9                       | -2894                  | promoter    |
| Sorbs1    | 3.8                  | down       | 27                  | 8.9                        | 7871                   | proximal    |
| Reep5     | 1.6                  | up         | 29                  | 6.9                        | 9843                   | proximal    |
| Papss2    | 1.7                  | down       | 22                  | 8.4                        | 6343                   | intragenic  |
| Papss2    | 2.0                  | down       | 22                  | 8.4                        | 6343                   | intragenic  |
| Ntng1     | 2.3                  | up         | 24                  | 6.1                        | -7143                  | intragenic  |
| Papss2    | 1.7                  | down       | 30                  | 8.0                        | 10832                  | intragenic  |
| Papss2    | 2.0                  | down       | 30                  | 8.0                        | 10832                  | intragenic  |
| F2rl1     | 1.9                  | up         | 17                  | 6.1                        | -12615                 | intragenic  |
| Ednra     | 2.4                  | up         | 59                  | 12.7                       | -12940                 | intragenic  |
| 2610035D1 | 1.6                  | down       | 30                  | 6.9                        | -13207                 | intragenic  |
| Bach2     | 4.0                  | down       | 29                  | 8.4                        | 13796                  | intragenic  |
| Col9a1    | 1.6                  | down       | 23                  | 7.0                        | 18627                  | intragenic  |
| Col9a1    | 11.8                 | down       | 23                  | 7.0                        | 18627                  | intragenic  |
| Myo10     | 1.7                  | up         | 38                  | 8.4                        | 20188                  | intragenic  |
| Nfkb1     | 1.5                  | up         | 21                  | 6.6                        | -26534                 | intragenic  |
| Col22a1   | 1.7                  | up         | 21                  | 4.7                        | -29483                 | intragenic  |
| Nedd4     | 1.5                  | up         | 21                  | 6.5                        | 29752                  | intragenic  |
| Myo10     | 1.7                  | up         | 41                  | 10.8                       | 31284                  | intragenic  |
| Igsf3     | 2.1                  | down       | 19                  | 6.4                        | 33860                  | intragenic  |
| Slc24a3   | 1.6                  | up         | 26                  | 7.7                        | 50443                  | intragenic  |
| Rapgef4   | 1.7                  | up         | 18                  | 5.6                        | 56846                  | intragenic  |
| Adamts2   | 2.2                  | up         | 20                  | 4.8                        | 60853                  | intragenic  |
| Adamts2   | 2.8                  | up         | 20                  | 4.8                        | 60853                  | intragenic  |
| Tgfb2     | 4.1                  | down       | 27                  | 8.7                        | -64820                 | intragenic  |
| Parva     | 2.1                  | up         | 19                  | 5.2                        | 72679                  | intragenic  |
| Ccdc46    | 1.5                  | up         | 18                  | 6.1                        | 75647                  | intragenic  |
| Sox5      | 4.6                  | down       | 37                  | 5.2                        | -152627                | intragenic  |

|           |     |      |    |      |         |            |
|-----------|-----|------|----|------|---------|------------|
| Sox5      | 6.4 | down | 37 | 5.2  | -152627 | intragenic |
| Sox5      | 2.3 | down | 37 | 5.2  | -152627 | intragenic |
| Sox5      | 1.9 | down | 37 | 5.2  | -152627 | intragenic |
| Dnahc11   | 1.5 | up   | 44 | 5.0  | -154796 | intragenic |
| Unc5c     | 1.7 | down | 23 | 6.6  | 155903  | intragenic |
| Sox5      | 4.6 | down | 31 | 8.4  | -170168 | intragenic |
| Sox5      | 6.4 | down | 31 | 8.4  | -170168 | intragenic |
| Sox5      | 2.3 | down | 31 | 8.4  | -170168 | intragenic |
| Sox5      | 1.9 | down | 31 | 8.4  | -170168 | intragenic |
| Nfib      | 2.0 | down | 28 | 8.0  | -200639 | intragenic |
| Nfib      | 3.7 | down | 28 | 8.0  | -200639 | intragenic |
| Nfib      | 1.5 | down | 28 | 8.0  | -200639 | intragenic |
| Nfib      | 3.0 | down | 28 | 8.0  | -200639 | intragenic |
| Nfib      | 2.9 | down | 28 | 8.0  | -200639 | intragenic |
| Lrrc7     | 1.7 | up   | 20 | 7.0  | -209118 | intragenic |
| Sox6      | 2.4 | down | 25 | 8.0  | -379335 | intragenic |
| Sox6      | 2.4 | down | 21 | 8.0  | -414475 | intragenic |
| Arhgef16  | 1.7 | up   | 58 | 13.7 | 13560   | distal     |
| Frs2      | 1.6 | up   | 31 | 9.1  | 14405   | distal     |
| Krt7      | 1.6 | up   | 25 | 8.0  | -15748  | distal     |
| Slmo2     | 1.7 | down | 45 | 11.7 | 16675   | distal     |
| Col25a1   | 1.5 | up   | 45 | 8.6  | -19767  | distal     |
| Col25a1   | 1.7 | up   | 45 | 8.6  | -19767  | distal     |
| Ypel5     | 1.5 | down | 34 | 5.2  | 30324   | distal     |
| Mef2c     | 1.8 | down | 30 | 8.0  | -42186  | distal     |
| Mef2c     | 1.6 | down | 30 | 8.0  | -42186  | distal     |
| Krr1      | 1.6 | up   | 34 | 7.1  | -47067  | distal     |
| E130114P1 | 3.1 | down | 19 | 6.4  | 52207   | distal     |
| Sox5      | 4.6 | down | 43 | 14.5 | 55265   | distal     |
| Sox5      | 6.4 | down | 43 | 14.5 | 55265   | distal     |
| Sox5      | 2.3 | down | 43 | 14.5 | 55265   | distal     |
| Sox5      | 1.9 | down | 43 | 14.5 | 55265   | distal     |
| Rasl11b   | 1.5 | up   | 20 | 5.6  | 58943   | distal     |
| Rasl11b   | 2.1 | up   | 20 | 5.6  | 58943   | distal     |
| Mtx2      | 1.7 | up   | 23 | 7.0  | 62853   | distal     |
| Rnpc3     | 2.0 | down | 38 | 9.4  | 69125   | distal     |
| Rasl11b   | 1.5 | up   | 31 | 6.6  | 71025   | distal     |
| Rasl11b   | 2.1 | up   | 31 | 6.6  | 71025   | distal     |
| Foxo1     | 2.2 | up   | 36 | 9.0  | -71747  | distal     |
| Tmprss2   | 2.1 | up   | 21 | 6.1  | 72330   | distal     |
| Hs1bp3    | 1.6 | up   | 27 | 8.9  | 73098   | distal     |

Table S4 Sox6 (2 pages)

| Gene      | Microarray           |            | Chip-Seq            |                            |                        | Association |
|-----------|----------------------|------------|---------------------|----------------------------|------------------------|-------------|
|           | Fold Change Absolute | Regulation | Chip-Seq tags count | Fold enrichment over input | Distance from TSS (bp) |             |
| Ing4      | 1.6                  | up         | 39                  | 6.9                        | -41                    | TSS         |
| Ing4      | 1.8                  | up         | 39                  | 6.9                        | -41                    | TSS         |
| Magi1     | 1.9                  | up         | 56                  | 8.9                        | -72                    | TSS         |
| Mtf2      | 2.3                  | down       | 32                  | 9.0                        | -138                   | TSS         |
| Gipc1     | 1.6                  | up         | 30                  | 7.8                        | -154                   | TSS         |
| Pin4      | 3.6                  | down       | 44                  | 12.5                       | -181                   | TSS         |
| Chchd3    | 1.6                  | up         | 53                  | 18.5                       | 262                    | TSS         |
| Laptm4a   | 2.1                  | up         | 24                  | 8.4                        | 319                    | TSS         |
| Sox5      | 4.6                  | down       | 118                 | 35.6                       | 567                    | TSS         |
| Sox5      | 6.4                  | down       | 118                 | 35.6                       | 567                    | TSS         |
| Sox5      | 2.3                  | down       | 118                 | 35.6                       | 567                    | TSS         |
| Sox5      | 1.9                  | down       | 118                 | 35.6                       | 567                    | TSS         |
| Magi1     | 1.9                  | up         | 28                  | 9.4                        | -593                   | TSS         |
| Maf       | 1.7                  | up         | 31                  | 4.7                        | 1180                   | promoter    |
| Sort1     | 1.6                  | up         | 41                  | 10.9                       | -1504                  | promoter    |
| Sort1     | 1.6                  | up         | 41                  | 10.9                       | -1504                  | promoter    |
| Ccdc6     | 3.4                  | down       | 26                  | 6.2                        | -1807                  | promoter    |
| Gpsm3     | 1.5                  | up         | 179                 | 30.9                       | -2894                  | promoter    |
| Sorbs1    | 3.8                  | down       | 27                  | 8.9                        | 7871                   | proximal    |
| Reep5     | 1.6                  | up         | 29                  | 6.9                        | 9843                   | proximal    |
| Papss2    | 1.7                  | down       | 22                  | 8.4                        | 6343                   | intragenic  |
| Papss2    | 2.0                  | down       | 22                  | 8.4                        | 6343                   | intragenic  |
| Ntng1     | 2.3                  | up         | 24                  | 6.1                        | -7143                  | intragenic  |
| Papss2    | 1.7                  | down       | 30                  | 8.0                        | 10832                  | intragenic  |
| Papss2    | 2.0                  | down       | 30                  | 8.0                        | 10832                  | intragenic  |
| F2rl1     | 1.9                  | up         | 17                  | 6.1                        | -12615                 | intragenic  |
| Ednra     | 2.4                  | up         | 59                  | 12.7                       | -12940                 | intragenic  |
| 2610035D1 | 1.6                  | down       | 30                  | 6.9                        | -13207                 | intragenic  |
| Bach2     | 4.0                  | down       | 29                  | 8.4                        | 13796                  | intragenic  |
| Col9a1    | 1.6                  | down       | 23                  | 7.0                        | 18627                  | intragenic  |
| Col9a1    | 11.8                 | down       | 23                  | 7.0                        | 18627                  | intragenic  |
| Myo10     | 1.7                  | up         | 38                  | 8.4                        | 20188                  | intragenic  |
| Nfkb1     | 1.5                  | up         | 21                  | 6.6                        | -26534                 | intragenic  |
| Col22a1   | 1.7                  | up         | 21                  | 4.7                        | -29483                 | intragenic  |
| Nedd4     | 1.5                  | up         | 21                  | 6.5                        | 29752                  | intragenic  |
| Myo10     | 1.7                  | up         | 41                  | 10.8                       | 31284                  | intragenic  |
| Igsf3     | 2.1                  | down       | 19                  | 6.4                        | 33860                  | intragenic  |
| Slc24a3   | 1.6                  | up         | 26                  | 7.7                        | 50443                  | intragenic  |
| Rapgef4   | 1.7                  | up         | 18                  | 5.6                        | 56846                  | intragenic  |
| Adamts2   | 2.2                  | up         | 20                  | 4.8                        | 60853                  | intragenic  |
| Adamts2   | 2.8                  | up         | 20                  | 4.8                        | 60853                  | intragenic  |
| Tgfb2     | 4.1                  | down       | 27                  | 8.7                        | -64820                 | intragenic  |
| Parva     | 2.1                  | up         | 19                  | 5.2                        | 72679                  | intragenic  |
| Ccdc46    | 1.5                  | up         | 18                  | 6.1                        | 75647                  | intragenic  |
| Sox5      | 4.6                  | down       | 37                  | 5.2                        | -152627                | intragenic  |

|           |     |      |    |      |         |            |
|-----------|-----|------|----|------|---------|------------|
| Sox5      | 6.4 | down | 37 | 5.2  | -152627 | intragenic |
| Sox5      | 2.3 | down | 37 | 5.2  | -152627 | intragenic |
| Sox5      | 1.9 | down | 37 | 5.2  | -152627 | intragenic |
| Dnahc11   | 1.5 | up   | 44 | 5.0  | -154796 | intragenic |
| Unc5c     | 1.7 | down | 23 | 6.6  | 155903  | intragenic |
| Sox5      | 4.6 | down | 31 | 8.4  | -170168 | intragenic |
| Sox5      | 6.4 | down | 31 | 8.4  | -170168 | intragenic |
| Sox5      | 2.3 | down | 31 | 8.4  | -170168 | intragenic |
| Sox5      | 1.9 | down | 31 | 8.4  | -170168 | intragenic |
| Nfib      | 2.0 | down | 28 | 8.0  | -200639 | intragenic |
| Nfib      | 3.7 | down | 28 | 8.0  | -200639 | intragenic |
| Nfib      | 1.5 | down | 28 | 8.0  | -200639 | intragenic |
| Nfib      | 3.0 | down | 28 | 8.0  | -200639 | intragenic |
| Nfib      | 2.9 | down | 28 | 8.0  | -200639 | intragenic |
| Lrrc7     | 1.7 | up   | 20 | 7.0  | -209118 | intragenic |
| Sox6      | 2.4 | down | 25 | 8.0  | -379335 | intragenic |
| Sox6      | 2.4 | down | 21 | 8.0  | -414475 | intragenic |
| Arhgef16  | 1.7 | up   | 58 | 13.7 | 13560   | distal     |
| Frs2      | 1.6 | up   | 31 | 9.1  | 14405   | distal     |
| Krt7      | 1.6 | up   | 25 | 8.0  | -15748  | distal     |
| Slmo2     | 1.7 | down | 45 | 11.7 | 16675   | distal     |
| Col25a1   | 1.5 | up   | 45 | 8.6  | -19767  | distal     |
| Col25a1   | 1.7 | up   | 45 | 8.6  | -19767  | distal     |
| Ypel5     | 1.5 | down | 34 | 5.2  | 30324   | distal     |
| Mef2c     | 1.8 | down | 30 | 8.0  | -42186  | distal     |
| Mef2c     | 1.6 | down | 30 | 8.0  | -42186  | distal     |
| Krr1      | 1.6 | up   | 34 | 7.1  | -47067  | distal     |
| E130114P1 | 3.1 | down | 19 | 6.4  | 52207   | distal     |
| Sox5      | 4.6 | down | 43 | 14.5 | 55265   | distal     |
| Sox5      | 6.4 | down | 43 | 14.5 | 55265   | distal     |
| Sox5      | 2.3 | down | 43 | 14.5 | 55265   | distal     |
| Sox5      | 1.9 | down | 43 | 14.5 | 55265   | distal     |
| Rasl11b   | 1.5 | up   | 20 | 5.6  | 58943   | distal     |
| Rasl11b   | 2.1 | up   | 20 | 5.6  | 58943   | distal     |
| Mtx2      | 1.7 | up   | 23 | 7.0  | 62853   | distal     |
| Rnpc3     | 2.0 | down | 38 | 9.4  | 69125   | distal     |
| Rasl11b   | 1.5 | up   | 31 | 6.6  | 71025   | distal     |
| Rasl11b   | 2.1 | up   | 31 | 6.6  | 71025   | distal     |
| Foxo1     | 2.2 | up   | 36 | 9.0  | -71747  | distal     |
| Tmprss2   | 2.1 | up   | 21 | 6.1  | 72330   | distal     |
| Hs1bp3    | 1.6 | up   | 27 | 8.9  | 73098   | distal     |

Table S4 Sox9 (17 pages)

| Gene      | Microarray              |            | Chip-Seq               |                               |
|-----------|-------------------------|------------|------------------------|-------------------------------|
|           | Fold Change<br>Absolute | Regulation | Chip-Seq<br>tags count | Fold enrichment<br>over input |
| Sh3kbp1   | 2.3                     | down       | 18                     | 7.9                           |
| Tnrc6b    | 1.6                     | up         | 25                     | 10.9                          |
| Ncam1     | 1.7                     | up         | 22                     | 7.3                           |
| Zfp113    | 2.1                     | up         | 22                     | 9.1                           |
| Calcoco1  | 2.2                     | up         | 36                     | 15.8                          |
| Dnm3os    | 2.1                     | down       | 24                     | 7.9                           |
| Tssc4     | 1.6                     | down       | 35                     | 7.1                           |
| Zfp335    | 2.1                     | up         | 20                     | 7.3                           |
| Ppt1      | 3.0                     | down       | 25                     | 7.0                           |
| Bdh2      | 2.0                     | up         | 18                     | 8.5                           |
| Rtkn      | 1.9                     | down       | 66                     | 17.6                          |
| Ylpm1     | 1.9                     | up         | 20                     | 7.3                           |
| Tle3      | 1.9                     | up         | 42                     | 20.6                          |
| Rbbp9     | 2.1                     | down       | 72                     | 25.3                          |
| Mtf2      | 1.9                     | down       | 62                     | 24.9                          |
| Prelp     | 11.8                    | down       | 28                     | 10.9                          |
| Fgd4      | 1.7                     | down       | 101                    | 50.9                          |
| Cltc      | 3.6                     | down       | 27                     | 10.3                          |
| Zfp191    | 2.2                     | down       | 40                     | 14.8                          |
| Scamp3    | 1.6                     | up         | 26                     | 7.6                           |
| Ints10    | 1.5                     | up         | 21                     | 6.7                           |
| Rbm5      | 3.3                     | up         | 33                     | 13.6                          |
| Prmt5     | 4.7                     | down       | 25                     | 8.3                           |
| Angptl1   | 2.2                     | down       | 28                     | 9.1                           |
| Klhdc10   | 2.6                     | down       | 19                     | 6.1                           |
| Adpgk     | 1.9                     | up         | 23                     | 8.4                           |
| Dpagt1    | 1.5                     | up         | 18                     | 6.6                           |
| Zfp462    | 3.3                     | up         | 25                     | 9.7                           |
| Nosip     | 1.7                     | down       | 25                     | 6.7                           |
| Mia1      | 12.4                    | down       | 60                     | 17.8                          |
| Rhobtb3   | 1.5                     | down       | 31                     | 10.3                          |
| Slc35a3   | 1.7                     | down       | 31                     | 15.2                          |
| Slc35a3   | 1.9                     | down       | 31                     | 15.2                          |
| Pde6d     | 2.1                     | down       | 21                     | 6.7                           |
| Cmtm5     | 4.4                     | down       | 31                     | 9.4                           |
| Col5a2    | 2.1                     | up         | 18                     | 5.5                           |
| Brd2      | 1.9                     | down       | 50                     | 22.2                          |
| Col9a3    | 1.6                     | down       | 33                     | 17.0                          |
| Pafah2    | 1.7                     | down       | 24                     | 6.7                           |
| Hist1h2be | 1.7                     | down       | 27                     | 7.1                           |
| Ak1       | 1.5                     | up         | 52                     | 21.8                          |
| Gnal      | 2.4                     | down       | 19                     | 6.1                           |
| Gtf2i     | 3.1                     | down       | 20                     | 6.7                           |
| Cobll1    | 1.7                     | down       | 27                     | 13.3                          |

|               |      |      |    |      |       |          |
|---------------|------|------|----|------|-------|----------|
| Gabpb1        | 2.4  | down | 26 | 9.7  | 576   | TSS      |
| Sdccag8       | 2.0  | up   | 20 | 6.1  | -578  | TSS      |
| Sox5          | 3.3  | down | 51 | 17.6 | 591   | TSS      |
| Sox5          | 5.0  | down | 51 | 17.6 | 591   | TSS      |
| Sox5          | 8.5  | down | 51 | 17.6 | 591   | TSS      |
| 2010106G01Rik | 2.4  | down | 20 | 7.9  | 647   | TSS      |
| 2010106G01Rik | 2.0  | down | 20 | 7.9  | 647   | TSS      |
| Cyr61         | 3.3  | down | 21 | 6.7  | 668   | TSS      |
| Hoxa9         | 1.5  | down | 21 | 6.7  | -753  | TSS      |
| Mical1        | 2.1  | up   | 33 | 17.0 | 834   | TSS      |
| Mical1        | 1.6  | up   | 33 | 17.0 | 834   | TSS      |
| Gfpt2         | 2.0  | down | 17 | 5.5  | 881   | TSS      |
| Gfpt2         | 1.5  | down | 17 | 5.5  | 881   | TSS      |
| Tsc22d1       | 17.0 | down | 29 | 9.4  | 888   | TSS      |
| Tsc22d1       | 2.1  | down | 29 | 9.4  | 888   | TSS      |
| Gtf3c6        | 1.7  | up   | 24 | 7.9  | 889   | TSS      |
| Plekhf2       | 2.2  | down | 41 | 19.4 | -921  | TSS      |
| Sphk1         | 2.7  | down | 17 | 7.3  | -932  | TSS      |
| 4930452G13Rik | 1.6  | down | 27 | 8.5  | 946   | TSS      |
| Fxyd3         | 1.7  | down | 24 | 9.4  | 982   | TSS      |
| Cyr61         | 3.3  | down | 21 | 7.2  | -989  | TSS      |
| Mbnl2         | 1.8  | down | 77 | 40.6 | -1075 | promoter |
| Ppp2r1a       | 1.9  | down | 28 | 13.9 | -1284 | promoter |
| Mapk9         | 4.3  | down | 19 | 6.1  | -1521 | promoter |
| Cic           | 1.9  | up   | 27 | 9.7  | -2080 | promoter |
| Nfatc1        | 2.4  | down | 42 | 18.2 | 2142  | promoter |
| Nfatc1        | 2.0  | down | 42 | 18.2 | 2142  | promoter |
| Nfatc1        | 3.1  | down | 42 | 18.2 | 2142  | promoter |
| Nfatc1        | 1.6  | down | 42 | 18.2 | 2142  | promoter |
| Tgfbi         | 2.3  | down | 21 | 5.6  | -2619 | promoter |
| Slc14a1       | 2.2  | down | 35 | 9.8  | 2781  | promoter |
| Slc14a1       | 1.9  | down | 35 | 9.8  | 2781  | promoter |
| Slc14a1       | 1.7  | down | 35 | 9.8  | 2781  | promoter |
| Foxp2         | 1.7  | down | 92 | 45.4 | -3072 | promoter |
| Foxp2         | 2.9  | down | 92 | 45.4 | -3072 | promoter |
| Rab8a         | 1.6  | up   | 24 | 12.7 | -3102 | promoter |
| Rab8a         | 1.8  | up   | 24 | 12.7 | -3102 | promoter |
| Sphk1         | 2.7  | down | 47 | 14.8 | -3131 | promoter |
| Mbnl1         | 1.6  | down | 20 | 12.1 | -3236 | promoter |
| Maml2         | 1.6  | down | 35 | 6.2  | -3242 | promoter |
| Clasp2        | 2.5  | down | 68 | 38.2 | -3302 | promoter |
| Rarg          | 1.8  | down | 23 | 9.1  | 3308  | promoter |
| Taf13         | 1.5  | up   | 29 | 11.1 | -3506 | promoter |
| Slc39a3       | 1.6  | up   | 19 | 7.3  | 3563  | promoter |
| Stard3        | 2.0  | up   | 17 | 7.9  | -4294 | promoter |
| Glis2         | 1.5  | down | 19 | 8.1  | -4294 | promoter |
| Glis2         | 1.8  | down | 19 | 8.1  | -4294 | promoter |
| Efnb3         | 1.5  | up   | 28 | 13.3 | 4365  | promoter |
| Rgmb          | 1.6  | down | 24 | 9.7  | 4470  | promoter |
| Wrnip1        | 4.6  | down | 37 | 12.7 | -4567 | promoter |

|               |     |      |     |      |       |            |
|---------------|-----|------|-----|------|-------|------------|
| Prosc         | 4.1 | down | 18  | 8.5  | -4670 | promoter   |
| Mbp           | 1.6 | down | 18  | 7.8  | -4738 | promoter   |
| Ech1          | 1.6 | up   | 24  | 9.8  | -4806 | promoter   |
| Olfml3        | 1.8 | up   | 19  | 8.1  | -3735 | proximal   |
| Ttc30b        | 1.5 | down | 36  | 8.0  | -4642 | proximal   |
| Papss2        | 3.1 | down | 59  | 20.3 | -5055 | proximal   |
| Papss2        | 6.5 | down | 59  | 20.3 | -5055 | proximal   |
| Mycbpap       | 2.1 | up   | 47  | 18.3 | 5077  | proximal   |
| Tbx15         | 2.6 | down | 27  | 13.3 | -5156 | proximal   |
| Tspan8        | 1.7 | down | 36  | 12.7 | -5314 | proximal   |
| Aaas          | 2.3 | down | 28  | 7.9  | 5390  | proximal   |
| Cap1          | 1.6 | up   | 44  | 25.5 | 5870  | proximal   |
| Sec14l1       | 1.9 | up   | 27  | 4.6  | -6327 | proximal   |
| Fscn1         | 2.4 | up   | 23  | 10.3 | -6538 | proximal   |
| Tgm2          | 2.0 | down | 24  | 12.1 | 6691  | proximal   |
| Comp          | 1.5 | down | 24  | 8.5  | -6705 | proximal   |
| 9430023L20Rik | 1.6 | up   | 22  | 10.3 | -6717 | proximal   |
| Hipk2         | 2.0 | up   | 21  | 10.3 | 6719  | proximal   |
| 1810011O10Rik | 1.8 | up   | 21  | 6.1  | 6878  | proximal   |
| Mest          | 1.7 | down | 40  | 9.1  | -7357 | proximal   |
| Mest          | 8.6 | down | 40  | 9.1  | -7357 | proximal   |
| Fbp2          | 2.3 | down | 106 | 49.1 | 7536  | proximal   |
| Slc29a1       | 2.0 | down | 26  | 12.7 | -7838 | proximal   |
| Lef1          | 1.7 | down | 20  | 7.9  | -7994 | proximal   |
| Cttnbp2nl     | 1.5 | down | 46  | 21.8 | 8009  | proximal   |
| Sec14l1       | 1.9 | up   | 40  | 17.2 | -8053 | proximal   |
| Evl           | 1.9 | up   | 15  | 7.9  | -8417 | proximal   |
| Kras          | 1.5 | up   | 64  | 15.7 | 8757  | proximal   |
| Rasl11b       | 4.4 | down | 22  | 8.5  | -8809 | proximal   |
| Camk2d        | 1.7 | down | 18  | 8.4  | -9216 | proximal   |
| Txndc11       | 1.9 | down | 322 | 6.4  | 9410  | proximal   |
| Txndc11       | 1.8 | down | 322 | 6.4  | 9410  | proximal   |
| Nrip1         | 1.9 | up   | 17  | 9.7  | -1009 | intragenic |
| Lum           | 3.0 | down | 20  | 7.3  | 1022  | intragenic |
| Bdh1          | 1.9 | down | 18  | 6.6  | 1128  | intragenic |
| Bdh1          | 2.2 | down | 18  | 6.6  | 1128  | intragenic |
| Deb1          | 1.9 | down | 51  | 17.0 | 1248  | intragenic |
| Spnb2         | 2.3 | down | 18  | 7.3  | -1364 | intragenic |
| Zfp238        | 2.9 | down | 53  | 16.7 | 1464  | intragenic |
| Ets2          | 2.0 | down | 21  | 7.9  | 1578  | intragenic |
| Lect1         | 1.6 | down | 18  | 8.5  | -1607 | intragenic |
| Col9a2        | 3.3 | down | 52  | 7.2  | 1654  | intragenic |
| Cthrc1        | 7.4 | down | 19  | 6.7  | 1721  | intragenic |
| Rarg          | 1.8 | down | 84  | 40.6 | -1786 | intragenic |
| Akap2         | 5.3 | down | 17  | 5.5  | 1861  | intragenic |
| Slc35e3       | 2.7 | down | 39  | 15.8 | -2102 | intragenic |
| Arhgef19      | 1.6 | down | 34  | 15.8 | 2182  | intragenic |
| Bahcc1        | 1.5 | down | 25  | 9.7  | 2232  | intragenic |
| Dusp6         | 1.7 | down | 19  | 9.1  | 2323  | intragenic |
| Arid3b        | 1.6 | up   | 30  | 7.3  | -2456 | intragenic |

|               |     |      |    |      |        |            |
|---------------|-----|------|----|------|--------|------------|
| Col9a3        | 1.6 | down | 47 | 23.0 | 2631   | intragenic |
| P4ha3         | 1.8 | down | 28 | 7.0  | 2890   | intragenic |
| P4ha3         | 2.5 | down | 28 | 7.0  | 2890   | intragenic |
| Plekhb1       | 1.8 | down | 30 | 12.7 | -2901  | intragenic |
| Fmnl2         | 2.7 | down | 37 | 17.6 | 3227   | intragenic |
| Fmnl2         | 5.0 | down | 37 | 17.6 | 3227   | intragenic |
| Arhgef1       | 1.6 | up   | 41 | 18.8 | 3238   | intragenic |
| Plce1         | 1.8 | down | 19 | 6.0  | 3461   | intragenic |
| Tmem2         | 1.7 | down | 41 | 20.0 | 3870   | intragenic |
| Cap1          | 1.6 | up   | 25 | 10.3 | -4216  | intragenic |
| E330033B04Rik | 1.6 | up   | 17 | 7.9  | -4507  | intragenic |
| Fam107a       | 2.5 | down | 24 | 11.5 | -4534  | intragenic |
| Slc35e3       | 2.7 | down | 38 | 19.4 | -4701  | intragenic |
| Igsf6         | 1.5 | up   | 19 | 8.1  | -4714  | intragenic |
| Nfe2          | 1.7 | up   | 96 | 53.3 | -4850  | intragenic |
| Ptpre         | 1.8 | up   | 32 | 8.4  | 5391   | intragenic |
| Papss2        | 3.1 | down | 25 | 11.5 | 6296   | intragenic |
| Papss2        | 6.5 | down | 25 | 11.5 | 6296   | intragenic |
| Amotl2        | 1.5 | down | 68 | 28.5 | 6378   | intragenic |
| Bmp5          | 2.0 | down | 75 | 36.4 | 6452   | intragenic |
| Col9a3        | 1.6 | down | 35 | 15.8 | 6696   | intragenic |
| Rgs10         | 2.5 | up   | 26 | 9.1  | -6905  | intragenic |
| Extl1         | 3.8 | down | 65 | 31.5 | -7083  | intragenic |
| Ntng1         | 1.6 | up   | 25 | 12.1 | -7118  | intragenic |
| Csgalnact1    | 1.6 | up   | 23 | 7.9  | -7360  | intragenic |
| Dst           | 1.8 | up   | 18 | 7.3  | 7379   | intragenic |
| Lbh           | 1.9 | down | 28 | 5.6  | 7783   | intragenic |
| Glt25d2       | 1.9 | down | 36 | 13.9 | 7909   | intragenic |
| Snx9          | 1.8 | down | 17 | 6.1  | 8305   | intragenic |
| 1190002H23Rik | 2.6 | down | 18 | 9.7  | -8348  | intragenic |
| Flnb          | 2.5 | down | 40 | 4.8  | 8412   | intragenic |
| Mgll          | 1.5 | down | 28 | 10.6 | 8545   | intragenic |
| Acvr1b        | 2.2 | down | 37 | 9.7  | 8728   | intragenic |
| Klf15         | 1.7 | down | 30 | 12.1 | 8737   | intragenic |
| Cntn1         | 1.7 | down | 31 | 12.7 | 9086   | intragenic |
| Nt5c2         | 4.8 | down | 45 | 19.3 | -9232  | intragenic |
| Ptk7          | 2.0 | up   | 30 | 11.6 | -9792  | intragenic |
| Aspscr1       | 1.6 | down | 21 | 9.1  | 10156  | intragenic |
| Etv5          | 1.7 | down | 47 | 18.3 | -10594 | intragenic |
| Dab2ip        | 1.8 | down | 51 | 20.0 | 10704  | intragenic |
| Bahcc1        | 1.5 | down | 23 | 8.5  | 10763  | intragenic |
| Papss2        | 3.1 | down | 68 | 29.7 | 10766  | intragenic |
| Papss2        | 6.5 | down | 68 | 29.7 | 10766  | intragenic |
| Glis2         | 1.5 | down | 17 | 9.7  | 10949  | intragenic |
| Glis2         | 1.8 | down | 17 | 9.7  | 10949  | intragenic |
| Bcor          | 1.6 | down | 26 | 11.5 | -11013 | intragenic |
| Jmy           | 1.6 | down | 21 | 9.1  | -11090 | intragenic |
| Bcl2l1        | 1.6 | down | 23 | 7.9  | -11153 | intragenic |
| Bcl2l1        | 1.5 | down | 23 | 7.9  | -11153 | intragenic |
| Postn         | 4.6 | down | 40 | 15.9 | 11642  | intragenic |



|          |      |      |     |      |        |            |
|----------|------|------|-----|------|--------|------------|
| Tns3     | 1.7  | down | 20  | 5.5  | -11648 | intragenic |
| Eps8     | 2.7  | down | 21  | 9.7  | -11686 | intragenic |
| Sox5     | 3.3  | down | 19  | 7.3  | -11711 | intragenic |
| Sox5     | 5.0  | down | 19  | 7.3  | -11711 | intragenic |
| Sox5     | 8.5  | down | 19  | 7.3  | -11711 | intragenic |
| Scrn1    | 1.5  | down | 27  | 13.9 | -11834 | intragenic |
| Cdc42ep3 | 2.5  | down | 16  | 7.3  | -11904 | intragenic |
| Cdc42ep3 | 1.7  | down | 16  | 7.3  | -11904 | intragenic |
| Lrp1     | 1.8  | up   | 24  | 9.7  | -12051 | intragenic |
| Ppard    | 1.6  | down | 54  | 19.3 | 12153  | intragenic |
| Adam11   | 1.9  | up   | 43  | 12.7 | 12677  | intragenic |
| Wwtr1    | 1.5  | down | 17  | 6.1  | -12689 | intragenic |
| Sulf2    | 2.4  | up   | 26  | 8.3  | -12780 | intragenic |
| Mccc2    | 2.5  | down | 20  | 6.1  | -13598 | intragenic |
| Bach2    | 1.6  | down | 54  | 26.1 | 13802  | intragenic |
| Slc35f1  | 2.2  | down | 25  | 6.7  | 13814  | intragenic |
| Col9a3   | 1.6  | down | 41  | 12.1 | 13938  | intragenic |
| Nsmce2   | 4.7  | down | 17  | 9.1  | 14308  | intragenic |
| Fgfr1op  | 3.0  | down | 17  | 7.9  | 14619  | intragenic |
| Nrp2     | 1.7  | down | 25  | 10.3 | 14830  | intragenic |
| Ctnnd1   | 1.7  | up   | 20  | 9.7  | -14830 | intragenic |
| Smox     | 1.7  | down | 65  | 33.3 | 14835  | intragenic |
| Smox     | 4.0  | down | 65  | 33.3 | 14835  | intragenic |
| Camk2a   | 1.6  | up   | 27  | 8.7  | 15055  | intragenic |
| Eps8     | 2.7  | down | 51  | 20.0 | -15136 | intragenic |
| Lrrc8d   | 1.5  | down | 40  | 8.5  | 15192  | intragenic |
| Srrm1    | 1.6  | up   | 30  | 9.0  | -15466 | intragenic |
| Mcf2l    | 2.2  | up   | 22  | 11.5 | 15690  | intragenic |
| Tpd52    | 1.5  | up   | 32  | 15.8 | -15739 | intragenic |
| Ssh1     | 1.8  | up   | 27  | 8.8  | -15991 | intragenic |
| Chst3    | 1.7  | down | 58  | 19.4 | -16258 | intragenic |
| Entpd6   | 1.8  | down | 26  | 8.5  | 16639  | intragenic |
| Entpd6   | 1.8  | down | 26  | 8.5  | 16639  | intragenic |
| Cspg4    | 1.7  | down | 116 | 25.9 | 16653  | intragenic |
| Maea     | 4.9  | down | 28  | 9.1  | 17595  | intragenic |
| Rgmb     | 1.6  | down | 41  | 13.3 | -17714 | intragenic |
| Aff1     | 2.0  | up   | 29  | 8.6  | 17775  | intragenic |
| Cpe      | 4.4  | down | 27  | 8.3  | -17868 | intragenic |
| Ppap2b   | 4.1  | down | 29  | 11.1 | 18124  | intragenic |
| Mbnl2    | 1.8  | down | 45  | 21.9 | 18465  | intragenic |
| Col9a1   | 19.6 | down | 54  | 18.8 | 18482  | intragenic |
| Col9a1   | 4.8  | down | 54  | 18.8 | 18482  | intragenic |
| Prpf40b  | 1.8  | up   | 20  | 9.4  | 18928  | intragenic |
| Sep-09   | 2.1  | up   | 55  | 25.5 | 19229  | intragenic |
| Chst3    | 1.7  | down | 29  | 9.1  | -19566 | intragenic |
| Ppcdc    | 1.6  | up   | 26  | 11.5 | -19685 | intragenic |
| Gja5     | 1.5  | up   | 79  | 36.0 | 20205  | intragenic |
| Slc18a2  | 1.6  | down | 41  | 14.4 | 20214  | intragenic |
| Pdzd8    | 2.1  | down | 27  | 10.3 | -20779 | intragenic |
| Ddah1    | 2.7  | down | 47  | 9.0  | 20853  | intragenic |

|            |      |      |     |      |        |            |
|------------|------|------|-----|------|--------|------------|
| Scin       | 11.8 | down | 39  | 17.6 | -21077 | intragenic |
| Kif21a     | 2.2  | down | 18  | 7.3  | -21327 | intragenic |
| Kif21a     | 2.3  | down | 18  | 7.3  | -21327 | intragenic |
| Lrp1       | 1.8  | up   | 29  | 10.2 | -21446 | intragenic |
| Sgms1      | 1.6  | down | 29  | 12.7 | -21774 | intragenic |
| Wwp2       | 1.6  | down | 40  | 7.7  | 21902  | intragenic |
| Wwp2       | 5.1  | down | 40  | 7.7  | 21902  | intragenic |
| Snx3       | 1.6  | down | 29  | 11.5 | 22027  | intragenic |
| Robo1      | 1.6  | down | 29  | 10.5 | 23276  | intragenic |
| Chst3      | 1.7  | down | 47  | 14.2 | -23997 | intragenic |
| Lef1       | 1.7  | down | 24  | 12.1 | 25166  | intragenic |
| Thsd4      | 2.3  | up   | 58  | 15.5 | -25333 | intragenic |
| Cxxc5      | 2.2  | down | 34  | 12.8 | 25817  | intragenic |
| Ptn        | 2.0  | down | 27  | 8.5  | -26325 | intragenic |
| Mgll       | 1.5  | down | 21  | 6.6  | 26346  | intragenic |
| Cd9        | 2.9  | down | 18  | 6.7  | -26428 | intragenic |
| Lmnb1      | 6.8  | down | 21  | 8.5  | 26622  | intragenic |
| Lmnb1      | 3.9  | down | 21  | 8.5  | 26622  | intragenic |
| Mbnl1      | 1.6  | down | 41  | 11.1 | 26648  | intragenic |
| Acan       | 3.7  | down | 22  | 10.0 | 26941  | intragenic |
| Acan       | 6.2  | down | 22  | 10.0 | 26941  | intragenic |
| Cd9        | 2.9  | down | 37  | 14.4 | -27241 | intragenic |
| Gli2       | 1.6  | down | 26  | 6.7  | -27360 | intragenic |
| Acot7      | 4.6  | down | 27  | 10.3 | 27433  | intragenic |
| Tex2       | 1.6  | up   | 15  | 7.9  | -27980 | intragenic |
| Prkar2b    | 2.3  | down | 42  | 19.4 | -28129 | intragenic |
| Prkar2b    | 1.9  | down | 42  | 19.4 | -28129 | intragenic |
| Lrp6       | 1.8  | down | 33  | 14.5 | -28949 | intragenic |
| Csgalnact1 | 1.6  | up   | 27  | 12.7 | -29133 | intragenic |
| Arhgap28   | 2.1  | down | 46  | 21.1 | -29167 | intragenic |
| Wwp2       | 1.6  | down | 43  | 13.3 | 29170  | intragenic |
| Wwp2       | 5.1  | down | 43  | 13.3 | 29170  | intragenic |
| Nt5dc3     | 2.0  | down | 17  | 7.9  | 29175  | intragenic |
| Crim1      | 2.4  | down | 25  | 9.7  | 29271  | intragenic |
| Sec24d     | 3.0  | down | 19  | 7.3  | 29368  | intragenic |
| Ptprf      | 1.9  | down | 26  | 6.7  | -29427 | intragenic |
| Cdk8       | 1.9  | down | 257 | 9.5  | 29496  | intragenic |
| Sema3d     | 2.8  | down | 16  | 7.3  | 29560  | intragenic |
| Zfp521     | 2.0  | down | 21  | 6.7  | -29727 | intragenic |
| Clint1     | 3.6  | down | 100 | 49.1 | 29981  | intragenic |
| Nfix       | 1.6  | down | 150 | 76.1 | -30149 | intragenic |
| Pcmt1      | 1.8  | down | 22  | 9.1  | 30601  | intragenic |
| Rala       | 1.7  | down | 23  | 9.1  | -30988 | intragenic |
| Dab1       | 1.8  | down | 66  | 22.4 | 32085  | intragenic |
| Tbx5       | 1.9  | up   | 22  | 8.5  | 32424  | intragenic |
| Dlc1       | 4.2  | down | 45  | 14.8 | -32702 | intragenic |
| Wwp2       | 1.6  | down | 52  | 12.8 | 32761  | intragenic |
| Wwp2       | 5.1  | down | 52  | 12.8 | 32761  | intragenic |
| Tle3       | 1.9  | up   | 84  | 30.5 | 33093  | intragenic |
| Chic2      | 1.7  | down | 28  | 9.1  | -33604 | intragenic |

|               |      |      |     |       |        |            |
|---------------|------|------|-----|-------|--------|------------|
| Chic2         | 2.1  | down | 28  | 9.1   | -33604 | intragenic |
| Gulp1         | 5.8  | down | 43  | 13.2  | 33615  | intragenic |
| Zfc3h1        | 1.6  | down | 15  | 7.3   | 33686  | intragenic |
| Gas2          | 2.4  | up   | 40  | 21.2  | 35267  | intragenic |
| Gng12         | 1.9  | down | 21  | 7.9   | 35473  | intragenic |
| Nfix          | 1.6  | down | 23  | 10.9  | -35961 | intragenic |
| Ptn           | 2.0  | down | 19  | 8.5   | -35984 | intragenic |
| Gramd3        | 3.3  | down | 18  | 9.7   | 36251  | intragenic |
| Itga9         | 1.9  | up   | 29  | 11.1  | 36360  | intragenic |
| Wwp2          | 1.6  | down | 70  | 25.5  | 36561  | intragenic |
| Wwp2          | 5.1  | down | 70  | 25.5  | 36561  | intragenic |
| Lmcd1         | 2.6  | down | 29  | 7.6   | 37814  | intragenic |
| Cdadc1        | 1.6  | down | 36  | 14.8  | -37842 | intragenic |
| Myh9          | 1.6  | up   | 25  | 8.9   | -38139 | intragenic |
| Actn4         | 2.6  | down | 33  | 14.5  | -38228 | intragenic |
| Actn4         | 7.6  | down | 33  | 14.5  | -38228 | intragenic |
| Actn4         | 1.9  | down | 33  | 14.5  | -38228 | intragenic |
| Vgll4         | 1.7  | down | 75  | 33.2  | -38328 | intragenic |
| Sox5          | 3.3  | down | 21  | 7.3   | -39689 | intragenic |
| Sox5          | 5.0  | down | 21  | 7.3   | -39689 | intragenic |
| Sox5          | 8.5  | down | 21  | 7.3   | -39689 | intragenic |
| Ptprm         | 1.6  | down | 22  | 8.8   | -39808 | intragenic |
| A430107O13Rik | 1.6  | down | 27  | 8.2   | 40661  | intragenic |
| Spsb1         | 2.5  | down | 23  | 7.3   | -41019 | intragenic |
| Efnb2         | 2.0  | up   | 198 | 104.2 | -41035 | intragenic |
| Tasp1         | 1.8  | down | 21  | 8.9   | -41037 | intragenic |
| Zfhx3         | 1.9  | up   | 65  | 30.9  | 41132  | intragenic |
| Cdon          | 1.8  | down | 47  | 12.7  | 41577  | intragenic |
| Ddah1         | 2.7  | down | 27  | 12.7  | 42144  | intragenic |
| Gmds          | 1.8  | down | 18  | 9.1   | -42174 | intragenic |
| Stk39         | 1.8  | down | 32  | 13.3  | -42306 | intragenic |
| Wwp2          | 1.6  | down | 27  | 9.7   | 42636  | intragenic |
| Wwp2          | 5.1  | down | 27  | 9.7   | 42636  | intragenic |
| Tspan18       | 2.8  | down | 61  | 10.6  | -43174 | intragenic |
| Hmcn1         | 3.7  | down | 20  | 9.7   | -43258 | intragenic |
| Sox5          | 3.3  | down | 26  | 11.5  | -43317 | intragenic |
| Sox5          | 5.0  | down | 26  | 11.5  | -43317 | intragenic |
| Sox5          | 8.5  | down | 26  | 11.5  | -43317 | intragenic |
| Runx1         | 2.5  | down | 48  | 17.5  | -43376 | intragenic |
| Rgs3          | 1.9  | down | 37  | 12.2  | 43789  | intragenic |
| Syne2         | 1.6  | up   | 20  | 9.7   | 44048  | intragenic |
| Col9a1        | 19.6 | down | 32  | 11.5  | 44317  | intragenic |
| Col9a1        | 4.8  | down | 32  | 11.5  | 44317  | intragenic |
| Unc5c         | 1.5  | down | 99  | 44.8  | 44378  | intragenic |
| Nedd4l        | 1.5  | down | 34  | 8.9   | 45637  | intragenic |
| Map4k4        | 1.7  | up   | 25  | 7.3   | 47007  | intragenic |
| Cnot2         | 4.8  | down | 34  | 13.3  | -47081 | intragenic |
| Lrch1         | 1.6  | down | 30  | 11.7  | -48070 | intragenic |
| Ccdc109a      | 4.1  | down | 49  | 21.2  | -50376 | intragenic |
| Sox6          | 3.3  | down | 30  | 6.7   | -50461 | intragenic |

|          |      |      |     |      |        |            |
|----------|------|------|-----|------|--------|------------|
| Sox6     | 1.8  | down | 30  | 6.7  | -50461 | intragenic |
| Zfp827   | 2.6  | up   | 29  | 11.3 | 50988  | intragenic |
| Nedd4l   | 1.5  | down | 20  | 9.7  | 51011  | intragenic |
| Rbms1    | 2.0  | down | 19  | 8.5  | -51879 | intragenic |
| Frmd6    | 1.7  | up   | 19  | 7.8  | 52459  | intragenic |
| Col9a1   | 19.6 | down | 28  | 14.5 | 53031  | intragenic |
| Col9a1   | 4.8  | down | 28  | 14.5 | 53031  | intragenic |
| Tssc1    | 1.8  | down | 31  | 16.4 | 53576  | intragenic |
| Tssc1    | 2.5  | down | 31  | 16.4 | 53576  | intragenic |
| Tssc1    | 5.0  | down | 31  | 16.4 | 53576  | intragenic |
| Nfatc1   | 2.4  | down | 16  | 6.0  | -53853 | intragenic |
| Nfatc1   | 2.0  | down | 16  | 6.0  | -53853 | intragenic |
| Nfatc1   | 3.1  | down | 16  | 6.0  | -53853 | intragenic |
| Nfatc1   | 1.6  | down | 16  | 6.0  | -53853 | intragenic |
| Bbs9     | 1.6  | down | 27  | 8.5  | 54130  | intragenic |
| Ift57    | 1.7  | up   | 52  | 13.8 | 54188  | intragenic |
| Fbn1     | 2.0  | up   | 19  | 9.1  | -54534 | intragenic |
| Rgs3     | 1.9  | down | 39  | 19.7 | 54619  | intragenic |
| Wwp2     | 1.6  | down | 37  | 12.2 | 55153  | intragenic |
| Wwp2     | 5.1  | down | 37  | 12.2 | 55153  | intragenic |
| Glt25d2  | 1.9  | down | 28  | 12.1 | 55567  | intragenic |
| Cdk6     | 1.8  | down | 32  | 15.2 | 55999  | intragenic |
| Spsb4    | 1.8  | down | 123 | 55.7 | -56039 | intragenic |
| Sorbs2   | 1.9  | down | 36  | 9.2  | 57026  | intragenic |
| Pitpnc1  | 2.3  | down | 91  | 28.1 | -57228 | intragenic |
| Prickle1 | 3.7  | down | 26  | 10.5 | -58496 | intragenic |
| Sema3d   | 2.8  | down | 23  | 9.7  | 59279  | intragenic |
| Camk2d   | 1.7  | down | 18  | 9.1  | 59473  | intragenic |
| Etv1     | 4.3  | down | 29  | 7.3  | 60164  | intragenic |
| Etv1     | 3.9  | down | 29  | 7.3  | 60164  | intragenic |
| Sema6a   | 1.7  | down | 17  | 6.7  | -60268 | intragenic |
| Erg      | 2.0  | down | 27  | 7.3  | -60517 | intragenic |
| Akap9    | 1.6  | up   | 22  | 9.7  | 61567  | intragenic |
| Mef2c    | 1.6  | down | 22  | 8.5  | 62045  | intragenic |
| Myo1e    | 2.6  | up   | 29  | 14.5 | 62199  | intragenic |
| Col14a1  | 2.2  | down | 21  | 6.7  | 62479  | intragenic |
| Tgfb2    | 2.0  | down | 38  | 12.1 | -64650 | intragenic |
| Sema3e   | 1.8  | down | 16  | 7.9  | 65519  | intragenic |
| Pcca     | 2.2  | down | 45  | 20.6 | 65652  | intragenic |
| Runx1    | 2.5  | down | 32  | 15.2 | -66257 | intragenic |
| Nfatc1   | 2.4  | down | 72  | 32.3 | -67425 | intragenic |
| Nfatc1   | 2.0  | down | 72  | 32.3 | -67425 | intragenic |
| Nfatc1   | 3.1  | down | 72  | 32.3 | -67425 | intragenic |
| Nfatc1   | 1.6  | down | 72  | 32.3 | -67425 | intragenic |
| Tox      | 4.6  | down | 30  | 13.9 | -67933 | intragenic |
| Lgr5     | 2.3  | down | 40  | 20.0 | -68757 | intragenic |
| Kirrel3  | 1.9  | up   | 68  | 36.4 | 69351  | intragenic |
| Pdzn3    | 1.7  | up   | 30  | 12.7 | -69648 | intragenic |
| Flnb     | 2.5  | down | 36  | 10.9 | 71572  | intragenic |
| Vcan     | 5.2  | down | 28  | 12.7 | -73154 | intragenic |

|               |     |      |     |      |         |            |
|---------------|-----|------|-----|------|---------|------------|
| Myo1e         | 2.6 | up   | 16  | 8.5  | 74220   | intragenic |
| Zfpm2         | 1.9 | down | 33  | 8.5  | 75280   | intragenic |
| Nfatc1        | 2.4 | down | 42  | 9.1  | -76227  | intragenic |
| Nfatc1        | 2.0 | down | 42  | 9.1  | -76227  | intragenic |
| Nfatc1        | 3.1 | down | 42  | 9.1  | -76227  | intragenic |
| Nfatc1        | 1.6 | down | 42  | 9.1  | -76227  | intragenic |
| Prickle1      | 3.7 | down | 33  | 11.5 | -77139  | intragenic |
| Sh3rf1        | 1.5 | up   | 48  | 21.2 | 77693   | intragenic |
| Gmfs          | 1.8 | down | 17  | 7.9  | -77890  | intragenic |
| Flnb          | 2.5 | down | 93  | 47.3 | 78968   | intragenic |
| Il1rap        | 1.7 | down | 27  | 9.7  | 80907   | intragenic |
| Unc5c         | 1.5 | down | 22  | 9.1  | 81900   | intragenic |
| Fgfr2         | 4.8 | down | 100 | 39.4 | -82724  | intragenic |
| Fgfr2         | 1.8 | down | 100 | 39.4 | -82724  | intragenic |
| Fgfr2         | 1.7 | down | 100 | 39.4 | -82724  | intragenic |
| Slit3         | 2.0 | up   | 29  | 12.7 | 82904   | intragenic |
| 2900011O08Rik | 2.6 | down | 33  | 11.7 | 84070   | intragenic |
| Figf          | 2.1 | down | 24  | 7.8  | -85837  | intragenic |
| Fbn1          | 2.0 | up   | 26  | 13.9 | -86103  | intragenic |
| Tanc1         | 1.7 | up   | 40  | 21.2 | 86532   | intragenic |
| Pitpnc1       | 2.3 | down | 18  | 9.1  | -90267  | intragenic |
| Rere          | 1.9 | up   | 25  | 7.3  | 91065   | intragenic |
| Myo1b         | 1.9 | down | 23  | 9.1  | -93907  | intragenic |
| Myo1b         | 2.1 | down | 23  | 9.1  | -93907  | intragenic |
| Nedd4l        | 1.5 | down | 52  | 20.1 | 94600   | intragenic |
| Eps8          | 2.7 | down | 15  | 6.7  | -95043  | intragenic |
| Fbn2          | 1.8 | up   | 35  | 15.8 | -95091  | intragenic |
| Lrch1         | 1.6 | down | 36  | 15.2 | -95850  | intragenic |
| Arhgap28      | 2.1 | down | 24  | 8.4  | -96249  | intragenic |
| Gli3          | 3.2 | down | 25  | 10.9 | 96366   | intragenic |
| Camk2d        | 1.7 | down | 26  | 9.7  | 98645   | intragenic |
| Mef2c         | 1.6 | down | 32  | 10.3 | 100355  | intragenic |
| Mef2c         | 1.6 | down | 18  | 6.7  | 101322  | intragenic |
| Ldb2          | 2.4 | down | 22  | 6.7  | -101426 | intragenic |
| Eya1          | 1.9 | down | 53  | 23.6 | -101810 | intragenic |
| Eya1          | 3.3 | down | 53  | 23.6 | -101810 | intragenic |
| Eya1          | 4.3 | down | 53  | 23.6 | -101810 | intragenic |
| Trio          | 1.6 | down | 15  | 6.7  | -102087 | intragenic |
| Trio          | 1.6 | down | 15  | 6.7  | -102087 | intragenic |
| Chst11        | 1.7 | down | 25  | 10.9 | 103198  | intragenic |
| Thsd4         | 2.3 | up   | 65  | 26.0 | -103472 | intragenic |
| Fmnl2         | 2.7 | down | 25  | 7.9  | 106756  | intragenic |
| Fmnl2         | 5.0 | down | 25  | 7.9  | 106756  | intragenic |
| Mpdz          | 1.7 | down | 24  | 11.5 | -109328 | intragenic |
| Mpdz          | 2.1 | down | 24  | 11.5 | -109328 | intragenic |
| Epha4         | 1.7 | up   | 38  | 9.6  | -109909 | intragenic |
| Ldb2          | 2.4 | down | 28  | 10.7 | -110572 | intragenic |
| Pitpnc1       | 2.3 | down | 27  | 8.1  | -111854 | intragenic |
| Sema6a        | 1.7 | down | 40  | 9.1  | -112860 | intragenic |
| Pdzrn3        | 1.7 | up   | 29  | 12.1 | -114273 | intragenic |

|         |     |      |     |      |         |            |
|---------|-----|------|-----|------|---------|------------|
| Col23a1 | 1.7 | up   | 22  | 5.6  | 116729  | intragenic |
| Col23a1 | 1.5 | up   | 22  | 5.6  | 116729  | intragenic |
| Ror1    | 2.0 | down | 47  | 8.6  | 119057  | intragenic |
| Fmnl2   | 2.7 | down | 19  | 5.8  | 119242  | intragenic |
| Fmnl2   | 5.0 | down | 19  | 5.8  | 119242  | intragenic |
| Zfp521  | 2.0 | down | 20  | 8.5  | -119486 | intragenic |
| Akap13  | 1.6 | up   | 19  | 6.1  | 119844  | intragenic |
| Sobp    | 1.8 | down | 32  | 6.7  | -120499 | intragenic |
| Sorbs2  | 1.9 | down | 58  | 11.0 | 121177  | intragenic |
| Erg     | 2.0 | down | 41  | 15.2 | -121972 | intragenic |
| Gphn    | 1.9 | up   | 283 | 8.7  | 124349  | intragenic |
| Fmnl2   | 2.7 | down | 38  | 16.4 | 125210  | intragenic |
| Fmnl2   | 5.0 | down | 38  | 16.4 | 125210  | intragenic |
| Sox5    | 3.3 | down | 23  | 7.3  | -127104 | intragenic |
| Sox5    | 5.0 | down | 23  | 7.3  | -127104 | intragenic |
| Sox5    | 8.5 | down | 23  | 7.3  | -127104 | intragenic |
| Sox6    | 3.3 | down | 34  | 8.5  | -129108 | intragenic |
| Sox6    | 1.8 | down | 34  | 8.5  | -129108 | intragenic |
| Erg     | 2.0 | down | 51  | 19.4 | -131307 | intragenic |
| Lphn3   | 1.7 | down | 21  | 8.5  | 134615  | intragenic |
| Lphn3   | 1.8 | down | 21  | 8.5  | 134615  | intragenic |
| Unc5c   | 1.5 | down | 35  | 16.4 | 135888  | intragenic |
| Hlcs    | 1.6 | up   | 17  | 7.9  | -139481 | intragenic |
| Pbx3    | 2.5 | down | 28  | 13.3 | -142238 | intragenic |
| Chst11  | 1.7 | down | 98  | 42.8 | 145338  | intragenic |
| Chst11  | 1.7 | down | 22  | 10.3 | 149578  | intragenic |
| Fat3    | 2.4 | up   | 21  | 11.5 | -150058 | intragenic |
| Fat3    | 1.7 | up   | 21  | 11.5 | -150058 | intragenic |
| Tcf12   | 2.0 | down | 54  | 19.3 | -151951 | intragenic |
| Sox5    | 3.3 | down | 115 | 29.5 | -152701 | intragenic |
| Sox5    | 5.0 | down | 115 | 29.5 | -152701 | intragenic |
| Sox5    | 8.5 | down | 115 | 29.5 | -152701 | intragenic |
| Edil3   | 1.7 | down | 22  | 10.9 | 154815  | intragenic |
| Chst11  | 1.7 | down | 27  | 8.3  | 154951  | intragenic |
| Unc5c   | 1.5 | down | 34  | 9.7  | 156009  | intragenic |
| Gmids   | 1.8 | down | 101 | 36.6 | -158526 | intragenic |
| Chst11  | 1.7 | down | 71  | 28.5 | 160576  | intragenic |
| Tox     | 4.6 | down | 21  | 7.9  | -166430 | intragenic |
| Sox5    | 3.3 | down | 77  | 40.0 | -170170 | intragenic |
| Sox5    | 5.0 | down | 77  | 40.0 | -170170 | intragenic |
| Sox5    | 8.5 | down | 77  | 40.0 | -170170 | intragenic |
| Sox6    | 3.3 | down | 23  | 8.5  | -170347 | intragenic |
| Sox6    | 1.8 | down | 23  | 8.5  | -170347 | intragenic |
| Col25a1 | 1.6 | down | 27  | 11.7 | 179816  | intragenic |
| Col25a1 | 1.9 | down | 27  | 11.7 | 179816  | intragenic |
| Pcca    | 2.2 | down | 47  | 26.7 | 180695  | intragenic |
| Palld   | 2.4 | up   | 27  | 11.5 | -193471 | intragenic |
| Grid2   | 2.6 | up   | 20  | 7.9  | 195928  | intragenic |
| Lphn3   | 1.7 | down | 29  | 10.9 | 197334  | intragenic |
| Lphn3   | 1.8 | down | 29  | 10.9 | 197334  | intragenic |

|               |     |      |     |      |         |            |
|---------------|-----|------|-----|------|---------|------------|
| Lphn3         | 1.7 | down | 26  | 12.7 | 204022  | intragenic |
| Lphn3         | 1.8 | down | 26  | 12.7 | 204022  | intragenic |
| Kif26b        | 1.9 | down | 18  | 7.9  | 204050  | intragenic |
| Ptpm          | 1.6 | down | 36  | 4.8  | -220540 | intragenic |
| Sox5          | 3.3 | down | 77  | 38.8 | -228325 | intragenic |
| Sox5          | 5.0 | down | 77  | 38.8 | -228325 | intragenic |
| Sox5          | 8.5 | down | 77  | 38.8 | -228325 | intragenic |
| Robo1         | 1.6 | down | 27  | 12.1 | 234077  | intragenic |
| Odz2          | 1.6 | up   | 21  | 10.9 | -239964 | intragenic |
| Pcdh7         | 1.5 | up   | 20  | 9.1  | 245039  | intragenic |
| Pcdh7         | 1.9 | up   | 20  | 9.1  | 245039  | intragenic |
| Kif26b        | 1.9 | down | 99  | 34.4 | 292121  | intragenic |
| Lphn3         | 1.7 | down | 45  | 20.6 | 302955  | intragenic |
| Lphn3         | 1.8 | down | 45  | 20.6 | 302955  | intragenic |
| Utrn          | 3.5 | down | 30  | 14.5 | -307401 | intragenic |
| Sox6          | 3.3 | down | 19  | 7.3  | -325647 | intragenic |
| Sox6          | 1.8 | down | 19  | 7.3  | -325647 | intragenic |
| Sox6          | 3.3 | down | 104 | 26.1 | -370045 | intragenic |
| Sox6          | 1.8 | down | 104 | 26.1 | -370045 | intragenic |
| Sox6          | 3.3 | down | 67  | 15.2 | -379120 | intragenic |
| Sox6          | 1.8 | down | 67  | 15.2 | -379120 | intragenic |
| Diap2         | 1.8 | up   | 14  | 7.3  | 397199  | intragenic |
| Sox6          | 3.3 | down | 19  | 6.1  | -520829 | intragenic |
| Sox6          | 1.8 | down | 19  | 6.1  | -520829 | intragenic |
| Lrp1b         | 1.7 | up   | 22  | 9.1  | -645791 | intragenic |
| Bsdc1         | 2.2 | up   | 49  | 19.7 | -10008  | distal     |
| Rasl11b       | 4.4 | down | 35  | 15.7 | 10387   | distal     |
| Tuba3b        | 1.9 | up   | 20  | 8.5  | -10444  | distal     |
| Phlda1        | 2.2 | down | 20  | 7.3  | 10888   | distal     |
| Fam101a       | 3.0 | down | 24  | 11.1 | -10888  | distal     |
| Dkk3          | 1.9 | down | 22  | 10.3 | 11355   | distal     |
| Nup214        | 1.8 | up   | 37  | 12.2 | -11614  | distal     |
| Snx7          | 2.2 | down | 32  | 13.9 | 11654   | distal     |
| Snx7          | 1.7 | down | 32  | 13.9 | 11654   | distal     |
| Fbln2         | 2.3 | down | 42  | 11.4 | -11670  | distal     |
| 9230105E05Rik | 1.9 | up   | 25  | 10.3 | -12020  | distal     |
| Pabpc1        | 1.7 | down | 28  | 10.9 | 12058   | distal     |
| Pabpc1        | 2.2 | down | 28  | 10.9 | 12058   | distal     |
| Pabpc1        | 3.0 | down | 28  | 10.9 | 12058   | distal     |
| Vasn          | 1.8 | down | 52  | 22.4 | 12062   | distal     |
| 1110034A24Rik | 1.7 | down | 41  | 13.3 | 12222   | distal     |
| 4930402H24Rik | 1.5 | up   | 23  | 6.7  | 12223   | distal     |
| 2410004N09Rik | 1.6 | up   | 21  | 9.7  | 12228   | distal     |
| Zfp687        | 2.2 | up   | 18  | 8.5  | -12467  | distal     |
| Thbs1         | 5.5 | down | 20  | 10.9 | -12736  | distal     |
| Thbs1         | 5.3 | down | 20  | 10.9 | -12736  | distal     |
| Tanc1         | 1.7 | up   | 32  | 9.9  | -13091  | distal     |
| Fzd9          | 1.9 | down | 84  | 35.7 | 13312   | distal     |
| Ilf3          | 1.8 | down | 22  | 7.3  | -13328  | distal     |
| Sh3kbp1       | 2.3 | down | 31  | 17.0 | -13415  | distal     |

|               |     |      |     |       |        |        |
|---------------|-----|------|-----|-------|--------|--------|
| Gorasp2       | 3.2 | down | 18  | 6.7   | -13683 | distal |
| Gorasp2       | 5.7 | down | 18  | 6.7   | -13683 | distal |
| Por           | 1.7 | up   | 25  | 10.3  | -14218 | distal |
| Eapp          | 2.1 | up   | 65  | 8.1   | 14564  | distal |
| Susd5         | 1.6 | down | 22  | 8.5   | -14679 | distal |
| Ncf2          | 7.1 | up   | 38  | 11.2  | -14870 | distal |
| Il17d         | 1.6 | down | 38  | 12.4  | -15048 | distal |
| Ppic          | 2.1 | down | 20  | 7.2   | 15469  | distal |
| 1500015O10Rik | 1.8 | down | 20  | 10.3  | -15528 | distal |
| Tpp1          | 2.0 | up   | 23  | 8.5   | 15535  | distal |
| Spg20         | 1.9 | down | 22  | 7.9   | -15571 | distal |
| Lect1         | 1.6 | down | 48  | 15.8  | 16011  | distal |
| Rasl11b       | 4.4 | down | 20  | 4.9   | 16069  | distal |
| Bbs12         | 1.7 | down | 20  | 6.7   | 16124  | distal |
| Dab2          | 1.6 | up   | 28  | 12.7  | -16143 | distal |
| Amotl2        | 1.5 | down | 29  | 13.3  | -16618 | distal |
| Plce1         | 1.8 | down | 197 | 100.6 | -16793 | distal |
| Rbpjl         | 3.0 | down | 71  | 28.5  | -16878 | distal |
| Lrmp          | 2.6 | up   | 26  | 7.5   | -17370 | distal |
| Fam181b       | 1.7 | down | 44  | 18.8  | -17623 | distal |
| Zfp521        | 2.0 | down | 26  | 7.8   | 18394  | distal |
| Hapln1        | 6.7 | down | 27  | 9.7   | -19234 | distal |
| Lrrc8d        | 1.5 | down | 40  | 16.1  | -19358 | distal |
| Dusp6         | 1.7 | down | 17  | 7.9   | -19445 | distal |
| Dab2          | 1.6 | up   | 21  | 9.1   | -19473 | distal |
| Rasl11b       | 4.4 | down | 39  | 11.0  | -19654 | distal |
| Col25a1       | 1.6 | down | 29  | 10.9  | -19790 | distal |
| Col25a1       | 1.9 | down | 29  | 10.9  | -19790 | distal |
| Bmpr1a        | 4.2 | down | 17  | 7.6   | 20254  | distal |
| Tbx4          | 1.6 | up   | 107 | 59.4  | 20426  | distal |
| Kcns1         | 2.1 | down | 81  | 10.7  | -20446 | distal |
| Lonp2         | 1.7 | up   | 26  | 7.5   | -20578 | distal |
| Foxf1a        | 1.6 | down | 37  | 13.9  | -20658 | distal |
| Tle3          | 1.9 | up   | 25  | 8.5   | -21070 | distal |
| Capn6         | 2.1 | down | 22  | 8.5   | 21090  | distal |
| Gls           | 3.1 | down | 23  | 6.7   | 21295  | distal |
| Igf2bp3       | 1.5 | up   | 92  | 14.6  | 21558  | distal |
| Col2a1        | 8.1 | down | 18  | 7.3   | 22031  | distal |
| Col2a1        | 1.9 | down | 18  | 7.3   | 22031  | distal |
| Col2a1        | 4.8 | down | 18  | 7.3   | 22031  | distal |
| Fam20b        | 1.7 | down | 18  | 9.5   | 22289  | distal |
| Prdx6         | 1.9 | up   | 32  | 14.5  | 22460  | distal |
| Bcas2         | 1.9 | up   | 65  | 26.7  | 22574  | distal |
| Rarb          | 2.4 | down | 26  | 7.3   | 22706  | distal |
| Rarb          | 2.6 | down | 26  | 7.3   | 22706  | distal |
| Lmnb1         | 6.8 | down | 17  | 6.7   | -22886 | distal |
| Lmnb1         | 3.9 | down | 17  | 6.7   | -22886 | distal |
| Col2a1        | 8.1 | down | 41  | 14.5  | 22907  | distal |
| Col2a1        | 1.9 | down | 41  | 14.5  | 22907  | distal |
| Col2a1        | 4.8 | down | 41  | 14.5  | 22907  | distal |



|               |     |      |     |      |        |        |
|---------------|-----|------|-----|------|--------|--------|
| Dact1         | 2.2 | down | 16  | 7.9  | 22980  | distal |
| Dact1         | 2.2 | down | 16  | 7.9  | 22980  | distal |
| Hopx          | 2.0 | down | 37  | 17.6 | 23079  | distal |
| Ptpn23        | 2.7 | up   | 22  | 9.7  | -23485 | distal |
| Myst4         | 1.9 | up   | 44  | 15.2 | -23586 | distal |
| Myst4         | 2.0 | up   | 44  | 15.2 | -23586 | distal |
| Tns4          | 1.8 | up   | 130 | 50.7 | 23995  | distal |
| Synpo         | 1.9 | down | 25  | 9.7  | 24184  | distal |
| Synpo         | 1.7 | down | 25  | 9.7  | 24184  | distal |
| Rcl1          | 3.0 | down | 45  | 20.6 | -24507 | distal |
| Six2          | 2.7 | down | 16  | 6.6  | 24893  | distal |
| Gjb6          | 1.6 | down | 25  | 9.4  | 25047  | distal |
| Laptm4b       | 2.5 | up   | 37  | 13.3 | -25342 | distal |
| Fzd9          | 1.9 | down | 23  | 6.6  | 25544  | distal |
| Clic4         | 3.7 | down | 28  | 13.8 | 25613  | distal |
| Clic4         | 4.7 | down | 28  | 13.8 | 25613  | distal |
| Tnrc6a        | 1.6 | up   | 37  | 8.9  | -25653 | distal |
| Slc14a1       | 2.2 | down | 36  | 18.8 | -26052 | distal |
| Slc14a1       | 1.9 | down | 36  | 18.8 | -26052 | distal |
| Slc14a1       | 1.7 | down | 36  | 18.8 | -26052 | distal |
| Col2a1        | 8.1 | down | 25  | 8.3  | 26359  | distal |
| Col2a1        | 1.9 | down | 25  | 8.3  | 26359  | distal |
| Col2a1        | 4.8 | down | 25  | 8.3  | 26359  | distal |
| Olig1         | 2.6 | down | 31  | 12.7 | 26819  | distal |
| Lyl1          | 2.0 | up   | 22  | 8.5  | 27125  | distal |
| Tgfb1         | 2.3 | down | 49  | 22.1 | -27320 | distal |
| Dnajb6        | 3.0 | down | 33  | 11.1 | -27368 | distal |
| Tmbim6        | 1.6 | up   | 34  | 17.0 | 27441  | distal |
| 4930405A21Rik | 1.7 | down | 28  | 14.5 | -27509 | distal |
| 9230105E05Rik | 1.9 | up   | 32  | 9.7  | 27819  | distal |
| 3110079O15Rik | 4.8 | down | 21  | 8.5  | -27822 | distal |
| Cntn1         | 1.7 | down | 21  | 7.9  | -28201 | distal |
| Dct           | 1.6 | down | 41  | 20.0 | 28367  | distal |
| Dct           | 1.7 | down | 41  | 20.0 | 28367  | distal |
| 1110058L19Rik | 1.5 | down | 32  | 14.5 | 28546  | distal |
| Zfp825        | 1.8 | down | 19  | 6.1  | 28806  | distal |
| Kcns1         | 2.1 | down | 47  | 16.4 | -28806 | distal |
| Actr10        | 3.9 | down | 15  | 8.5  | -29105 | distal |
| Fgfr3         | 1.8 | down | 23  | 8.5  | -29252 | distal |
| Fgfr3         | 5.1 | down | 23  | 8.5  | -29252 | distal |
| Cdkn2aip      | 1.7 | up   | 41  | 9.7  | 29339  | distal |
| Gfpt2         | 2.0 | down | 25  | 9.1  | -29344 | distal |
| Gfpt2         | 1.5 | down | 25  | 9.1  | -29344 | distal |
| Bmf           | 2.1 | up   | 128 | 53.9 | -29412 | distal |
| Dnm3os        | 2.1 | down | 28  | 5.5  | -29737 | distal |
| Dact1         | 2.2 | down | 18  | 6.1  | -29891 | distal |
| Dact1         | 2.2 | down | 18  | 6.1  | -29891 | distal |
| Chst11        | 1.7 | down | 63  | 10.0 | -30180 | distal |
| Tmem17        | 1.6 | down | 22  | 7.3  | -30490 | distal |
| Angptl1       | 2.2 | down | 22  | 9.4  | -30500 | distal |

|         |      |      |     |      |        |        |
|---------|------|------|-----|------|--------|--------|
| Ndufb4  | 2.3  | up   | 30  | 10.0 | 30582  | distal |
| Tmed3   | 2.5  | down | 26  | 10.9 | -30705 | distal |
| Itgb1   | 1.7  | down | 28  | 7.9  | -30899 | distal |
| Plekha1 | 2.0  | down | 37  | 10.1 | -31372 | distal |
| Postn   | 4.6  | down | 26  | 11.5 | 31575  | distal |
| Sox11   | 3.1  | up   | 26  | 7.4  | -31706 | distal |
| Sox11   | 1.6  | up   | 26  | 7.4  | -31706 | distal |
| Acan    | 3.7  | down | 34  | 11.6 | -31905 | distal |
| Acan    | 6.2  | down | 34  | 11.6 | -31905 | distal |
| Lats2   | 1.7  | down | 37  | 18.8 | -32385 | distal |
| Isca2   | 2.8  | up   | 23  | 11.5 | 32474  | distal |
| Dok1    | 2.9  | down | 36  | 9.1  | -33186 | distal |
| Dok1    | 2.8  | down | 36  | 9.1  | -33186 | distal |
| Lonrf1  | 2.0  | down | 36  | 17.0 | 33744  | distal |
| Sars    | 1.6  | up   | 37  | 13.9 | 33828  | distal |
| Stmn4   | 1.6  | down | 91  | 38.2 | 34113  | distal |
| Dab2ip  | 1.8  | down | 24  | 9.7  | -34295 | distal |
| Acpl2   | 1.5  | down | 37  | 12.1 | 34327  | distal |
| Acpl2   | 2.5  | down | 37  | 12.1 | 34327  | distal |
| Dnajc24 | 2.6  | down | 34  | 10.9 | 34824  | distal |
| Slc4a3  | 1.9  | up   | 44  | 17.0 | 35828  | distal |
| Mylk    | 1.9  | up   | 18  | 7.3  | -35871 | distal |
| Rasl11b | 4.4  | down | 34  | 7.0  | -35998 | distal |
| Amotl2  | 1.5  | down | 30  | 10.3 | -36074 | distal |
| Erb2ip  | 2.3  | down | 23  | 9.4  | 36863  | distal |
| Vcan    | 5.2  | down | 56  | 15.4 | 36872  | distal |
| Myst4   | 1.9  | up   | 33  | 15.2 | -37108 | distal |
| Myst4   | 2.0  | up   | 33  | 15.2 | -37108 | distal |
| Unc13c  | 1.8  | up   | 36  | 15.5 | 37361  | distal |
| Maml2   | 1.6  | down | 23  | 10.3 | -38588 | distal |
| Fam101a | 3.0  | down | 121 | 57.6 | -39196 | distal |
| Mtus1   | 1.7  | up   | 17  | 6.7  | 39845  | distal |
| Papss2  | 3.1  | down | 33  | 11.5 | -40089 | distal |
| Papss2  | 6.5  | down | 33  | 11.5 | -40089 | distal |
| Slc25a4 | 2.1  | up   | 22  | 9.1  | 40226  | distal |
| Asns    | 3.1  | down | 35  | 12.7 | 40396  | distal |
| Runx1   | 2.5  | down | 51  | 24.1 | 41890  | distal |
| Vgll4   | 1.7  | down | 70  | 29.1 | 42065  | distal |
| Cpm     | 1.5  | up   | 33  | 4.6  | -42508 | distal |
| Sgk1    | 1.6  | down | 30  | 14.5 | -42661 | distal |
| Ndst1   | 1.8  | up   | 40  | 11.6 | -42708 | distal |
| Kcnj2   | 2.3  | down | 42  | 17.6 | -43067 | distal |
| Ndst1   | 1.8  | up   | 32  | 12.8 | -43661 | distal |
| Dab2ip  | 1.8  | down | 76  | 27.4 | -44242 | distal |
| Fstl1   | 30.5 | down | 27  | 8.6  | -44745 | distal |
| Plce1   | 1.8  | down | 46  | 14.2 | -45129 | distal |
| Cdon    | 1.8  | down | 41  | 13.3 | -46199 | distal |
| Zmynd11 | 2.9  | down | 19  | 8.5  | 46827  | distal |
| Zmynd11 | 1.9  | down | 19  | 8.5  | 46827  | distal |
| Zmynd11 | 3.2  | down | 19  | 8.5  | 46827  | distal |

|               |     |      |     |       |        |        |
|---------------|-----|------|-----|-------|--------|--------|
| Krr1          | 3.1 | down | 204 | 100.6 | -47067 | distal |
| Has2          | 2.1 | down | 22  | 9.7   | 47673  | distal |
| Tnfrsf21      | 1.8 | down | 26  | 8.5   | -47759 | distal |
| C030044B11Rik | 1.8 | down | 44  | 7.6   | 48295  | distal |
| Cdc42ep3      | 2.5 | down | 26  | 9.1   | -48950 | distal |
| Cdc42ep3      | 1.7 | down | 26  | 9.1   | -48950 | distal |
| Tlr13         | 2.0 | up   | 23  | 10.3  | -49440 | distal |
| Flrt1         | 1.9 | up   | 31  | 11.2  | 49692  | distal |
| Prrc1         | 1.7 | down | 58  | 27.4  | 50562  | distal |
| Foxp4         | 1.5 | up   | 47  | 21.2  | 51372  | distal |
| Tgif1         | 1.8 | down | 67  | 30.3  | -52307 | distal |
| Tgif1         | 3.4 | down | 67  | 30.3  | -52307 | distal |
| Cyr61         | 3.3 | down | 39  | 5.6   | 53748  | distal |
| Scrg1         | 1.9 | down | 24  | 10.3  | -54069 | distal |
| Jun           | 1.8 | up   | 19  | 8.5   | 54100  | distal |
| Jdp2          | 1.6 | down | 17  | 8.5   | -54199 | distal |
| Fzd5          | 1.7 | down | 28  | 7.9   | 54531  | distal |
| Sox5          | 3.3 | down | 94  | 28.3  | 54771  | distal |
| Sox5          | 5.0 | down | 94  | 28.3  | 54771  | distal |
| Sox5          | 8.5 | down | 94  | 28.3  | 54771  | distal |
| Dact1         | 2.2 | down | 24  | 7.3   | -54999 | distal |
| Dact1         | 2.2 | down | 24  | 7.3   | -54999 | distal |
| Susd5         | 1.6 | down | 21  | 6.1   | 55132  | distal |
| 1190002N15Rik | 4.5 | down | 53  | 25.5  | -55254 | distal |
| Nog           | 4.0 | down | 41  | 7.9   | 56284  | distal |
| Erg           | 2.0 | down | 23  | 9.1   | 56489  | distal |
| Spred1        | 2.0 | down | 26  | 10.9  | -56681 | distal |
| 9030625A04Rik | 2.3 | down | 25  | 7.7   | -57053 | distal |
| BC027231      | 1.6 | down | 29  | 9.1   | -57670 | distal |
| BC027231      | 1.6 | down | 34  | 7.8   | -58660 | distal |
| Rars          | 1.7 | down | 27  | 10.6  | 58733  | distal |
| Dlc1          | 4.2 | down | 29  | 11.5  | -58859 | distal |
| Psat1         | 2.6 | down | 31  | 15.5  | -58952 | distal |
| Usp47         | 1.6 | down | 21  | 9.7   | -60141 | distal |
| Psat1         | 2.6 | down | 23  | 8.3   | -60239 | distal |
| Spsb1         | 2.5 | down | 47  | 13.9  | -60925 | distal |
| Glul          | 2.3 | up   | 23  | 10.9  | 62421  | distal |
| Acan          | 3.7 | down | 43  | 11.5  | -62978 | distal |
| Acan          | 6.2 | down | 43  | 11.5  | -62978 | distal |
| 4930545L23Rik | 1.6 | down | 21  | 8.3   | -63572 | distal |
| Ppp2r2a       | 6.4 | down | 33  | 13.9  | 63710  | distal |
| Itga11        | 1.5 | down | 63  | 19.6  | -64624 | distal |
| Tgif1         | 1.8 | down | 20  | 7.9   | -65585 | distal |
| Tgif1         | 3.4 | down | 20  | 7.9   | -65585 | distal |
| Cep78         | 2.0 | down | 17  | 8.5   | 65815  | distal |
| Etv5          | 1.7 | down | 31  | 13.3  | -66594 | distal |
| Gcnt1         | 1.9 | down | 51  | 26.7  | -68102 | distal |
| Gcnt1         | 2.2 | down | 51  | 26.7  | -68102 | distal |
| Stk32a        | 1.6 | down | 24  | 6.7   | -68580 | distal |
| Prg4          | 1.6 | down | 20  | 7.3   | 68770  | distal |

|          |     |      |     |      |        |        |
|----------|-----|------|-----|------|--------|--------|
| Zmynd11  | 2.9 | down | 233 | 8.4  | 69026  | distal |
| Zmynd11  | 1.9 | down | 233 | 8.4  | 69026  | distal |
| Zmynd11  | 3.2 | down | 233 | 8.4  | 69026  | distal |
| Ppic     | 2.1 | down | 71  | 18.7 | -69736 | distal |
| Etv5     | 1.7 | down | 27  | 11.5 | 69776  | distal |
| Apip     | 2.1 | down | 31  | 12.1 | 70814  | distal |
| Rasl11b  | 4.4 | down | 48  | 15.8 | 70945  | distal |
| Cyp26b1  | 2.6 | down | 32  | 15.8 | 71307  | distal |
| Fndc3b   | 2.3 | down | 33  | 10.9 | 72010  | distal |
| Smyd2    | 2.5 | down | 25  | 7.8  | -72521 | distal |
| Ect2     | 2.2 | down | 29  | 13.3 | -72554 | distal |
| Map4k3   | 1.6 | down | 37  | 12.8 | 72891  | distal |
| Rab11a   | 3.3 | down | 63  | 24.4 | -73033 | distal |
| Hs1bp3   | 1.8 | down | 47  | 22.4 | 73080  | distal |
| Hs1bp3   | 2.2 | down | 47  | 22.4 | 73080  | distal |
| Frmd6    | 1.7 | up   | 23  | 9.9  | -73149 | distal |
| Bcor     | 1.6 | down | 49  | 27.9 | -73685 | distal |
| Fign     | 2.1 | down | 40  | 18.2 | 74487  | distal |
| Lbh      | 1.9 | down | 19  | 9.1  | 75475  | distal |
| Tmem17   | 1.6 | down | 20  | 6.7  | 75656  | distal |
| Uncx     | 1.7 | up   | 51  | 15.8 | 75869  | distal |
| Fndc3b   | 2.3 | down | 27  | 9.1  | 76291  | distal |
| Mrpl13   | 1.6 | up   | 25  | 10.1 | -77520 | distal |
| Kcnk1    | 1.8 | down | 70  | 35.7 | 78288  | distal |
| Glul     | 2.3 | up   | 42  | 17.0 | 78531  | distal |
| Lsm6     | 1.5 | up   | 47  | 21.8 | -78549 | distal |
| Snx2     | 6.8 | down | 20  | 7.9  | -78797 | distal |
| Snx2     | 5.2 | down | 20  | 7.9  | -78797 | distal |
| Elac2    | 1.9 | down | 27  | 8.3  | -79005 | distal |
| Col11a1  | 3.1 | down | 17  | 7.9  | -79864 | distal |
| Col11a1  | 2.1 | down | 17  | 7.9  | -79864 | distal |
| Ptprz1   | 1.9 | down | 24  | 8.5  | -80998 | distal |
| Ptprz1   | 2.0 | down | 24  | 8.5  | -80998 | distal |
| Micall2  | 1.7 | up   | 19  | 7.9  | -81594 | distal |
| Postn    | 4.6 | down | 52  | 22.7 | 82961  | distal |
| Sesn3    | 2.5 | down | 121 | 33.1 | -83392 | distal |
| Prrc1    | 1.7 | down | 56  | 29.7 | -83518 | distal |
| Fam114a2 | 1.7 | up   | 31  | 16.4 | -84294 | distal |
| Umps     | 7.8 | down | 29  | 12.7 | 84423  | distal |
| Foxf2    | 2.1 | up   | 30  | 12.1 | 85166  | distal |
| Trib2    | 1.6 | up   | 49  | 22.4 | -85308 | distal |
| St3gal1  | 1.6 | down | 28  | 8.5  | -86093 | distal |
| Phlda1   | 2.2 | down | 37  | 14.1 | 86708  | distal |
| Tle3     | 1.9 | up   | 24  | 9.4  | -87198 | distal |
| Glcci1   | 2.1 | down | 22  | 10.3 | 88205  | distal |
| Glcci1   | 1.5 | down | 22  | 10.3 | 88205  | distal |
| Gmds     | 1.8 | down | 23  | 6.7  | 88420  | distal |
| Snx2     | 6.8 | down | 19  | 7.5  | -88618 | distal |
| Snx2     | 5.2 | down | 19  | 7.5  | -88618 | distal |
| Dact1    | 2.2 | down | 22  | 5.9  | 88891  | distal |

|         |     |      |     |      |        |        |
|---------|-----|------|-----|------|--------|--------|
| Dact1   | 2.2 | down | 22  | 5.9  | 88891  | distal |
| Sep-10  | 1.9 | down | 18  | 6.1  | -89744 | distal |
| Dnm3os  | 2.1 | down | 79  | 12.0 | -90636 | distal |
| Yipf5   | 1.6 | up   | 27  | 12.7 | -91132 | distal |
| Tgif1   | 1.8 | down | 24  | 7.3  | -91154 | distal |
| Tgif1   | 3.4 | down | 24  | 7.3  | -91154 | distal |
| Kank1   | 5.6 | down | 27  | 8.5  | -91845 | distal |
| Jun     | 1.8 | up   | 30  | 8.1  | 92180  | distal |
| Ndufa10 | 1.5 | up   | 43  | 20.0 | -94319 | distal |
| Bbox1   | 1.5 | down | 17  | 7.3  | -94849 | distal |
| Pde7a   | 4.1 | down | 142 | 70.3 | 95057  | distal |
| Pde7a   | 2.6 | down | 142 | 70.3 | 95057  | distal |
| Pdzrn3  | 1.7 | up   | 24  | 8.1  | 95516  | distal |
| Robo2   | 1.7 | up   | 45  | 17.7 | 95606  | distal |
| Robo2   | 1.5 | up   | 45  | 17.7 | 95606  | distal |
| Cyld    | 2.4 | up   | 22  | 9.1  | 95809  | distal |
| Dach1   | 1.6 | down | 22  | 10.3 | 96131  | distal |
| Pxdn    | 3.0 | down | 43  | 15.9 | 96797  | distal |
| Psat1   | 2.6 | down | 44  | 9.1  | -97184 | distal |
| Tns3    | 1.7 | down | 44  | 15.0 | 97221  | distal |
| Gdf10   | 2.2 | down | 46  | 13.0 | -99068 | distal |
| Mrpl13  | 1.6 | up   | 48  | 22.4 | -99897 | distal |
| Dleu7   | 1.8 | down | 32  | 7.0  | -99973 | distal |
|         |     |      |     |      |        |        |
|         |     |      |     |      |        |        |

Table S5 Sox5 (4 pages)

| CHIPSeq_MACS_Peak_id | CHIPSeq_MACS_PeakTags | CHIPSeq_MACS_PeakFoldEnrichment | GenesSymbol   | AbsoluteDistanceFromPeakToGene | ProbeID | ExpressionFoldChangeAbsolute | ExpressionRegulationDirection |
|----------------------|-----------------------|---------------------------------|---------------|--------------------------------|---------|------------------------------|-------------------------------|
| MACS_Peak_10         | 38                    | 8.43                            | Stat4         | 11411                          | 5560066 | 2.192642212                  | up                            |
| MACS_Peak_79         | 51                    | 19.94                           | Trim16        | 672                            | 7550520 | 1.743749976                  | up                            |
| MACS_Peak_253        | 20                    | 6.65                            | Fam173a       | 2572                           | 2030181 | 1.778350115                  | up                            |
| MACS_Peak_201        | 18                    | 6.04                            | Myo10         | 20199                          | 1470035 | 1.700320125                  | up                            |
| MACS_Peak_112        | 23                    | 9.46                            | Rhob          | 113480                         | 1710538 | 2.576362133                  | down                          |
| MACS_Peak_98         | 33                    | 5.15                            | Etv4          | 52287                          | 270010  | 1.609756589                  | up                            |
| MACS_Peak_374        | 23                    | 9.06                            | Map3k7        | 39636                          | 6860736 | 1.872915387                  | down                          |
| MACS_Peak_375        | 19                    | 5.58                            | Map3k7        | 216594                         | 6860736 | 1.872915387                  | down                          |
| MACS_Peak_359        | 22                    | 8.71                            | Fmo5          | 3188                           | 5220477 | 1.681067348                  | up                            |
| MACS_Peak_223        | 20                    | 7.25                            | Txndc11       | 9554                           | 2030452 | 1.503304601                  | up                            |
| MACS_Peak_625        | 18                    | 6.65                            | Tgfb2         | 209210                         | 4200246 | 1.528139591                  | up                            |
| MACS_Peak_626        | 17                    | 7.86                            | Tgfb2         | 295670                         | 4200246 | 1.528139591                  | up                            |
| MACS_Peak_72         | 25                    | 5.91                            | Odz2          | 733896                         | 7050408 | 2.188945532                  | down                          |
| MACS_Peak_336        | 19                    | 6.04                            | Dok5          | 104465                         | 5270600 | 1.511301041                  | up                            |
| MACS_Peak_336        | 19                    | 6.04                            | Dok5          | 104465                         | 1230474 | 1.709348679                  | up                            |
| MACS_Peak_357        | 17                    | 6.65                            | Gatad2b       | 13973                          | 6400086 | 2.021556139                  | down                          |
| MACS_Peak_592        | 19                    | 7.86                            | Zfx3          | 120483                         | 3870068 | 2.569363832                  | down                          |
| MACS_Peak_592        | 19                    | 7.86                            | Zfx3          | 120483                         | 6580376 | 1.584697604                  | down                          |
| MACS_Peak_280        | 16                    | 6.58                            | Mapre2        | 189                            | 6860543 | 1.696675301                  | down                          |
| MACS_Peak_8          | 34                    | 14.5                            | Fhl2          | 194366                         | 2350019 | 1.584973693                  | up                            |
| MACS_Peak_459        | 22                    | 8.09                            | Piwil1        | 62382                          | 6270390 | 1.564337134                  | up                            |
| MACS_Peak_523        | 61                    | 10.11                           | Pde3a         | 276607                         | 4070168 | 1.607645631                  | up                            |
| MACS_Peak_22         | 20                    | 6.04                            | Twist2        | 182470                         | 6420739 | 1.793907762                  | up                            |
| MACS_Peak_404        | 21                    | 9.06                            | Ptpru         | 384315                         | 3170735 | 2.041645288                  | up                            |
| MACS_Peak_616        | 34                    | 6.74                            | Tie3          | 246209                         | 2710338 | 1.613103151                  | down                          |
| MACS_Peak_56         | 26                    | 5.81                            | Fam13c        | 27369                          | 4540474 | 1.620222092                  | up                            |
| MACS_Peak_499        | 16                    | 6.04                            | Tax1bp1       | 26636                          | 840475  | 1.91344583                   | down                          |
| MACS_Peak_500        | 19                    | 7.1                             | Tax1bp1       | 81665                          | 840475  | 1.91344583                   | down                          |
| MACS_Peak_236        | 30                    | 12.42                           | Robo1         | 570544                         | 2760343 | 1.873947024                  | down                          |
| MACS_Peak_506        | 34                    | 8.78                            | Dysf          | 115478                         | 1450068 | 1.529547811                  | up                            |
| MACS_Peak_506        | 34                    | 8.78                            | Dysf          | 115478                         | 7610398 | 1.574743271                  | up                            |
| MACS_Peak_263        | 30                    | 6.29                            | Rftn1         | 239810                         | 5560349 | 1.694047093                  | up                            |
| MACS_Peak_470        | 18                    | 6.04                            | Sdk1          | 505041                         | 380463  | 2.000249386                  | up                            |
| MACS_Peak_106        | 25                    | 6.04                            | 2610035D17Rik | 13238                          | 1090044 | 1.550805688                  | down                          |
| MACS_Peak_107        | 18                    | 6.04                            | 2610035D17Rik | 19825                          | 1090044 | 1.550805688                  | down                          |
| MACS_Peak_465        | 17                    | 5.44                            | Cux1          | 66960                          | 5820465 | 1.760463476                  | down                          |
| MACS_Peak_567        | 18                    | 5.85                            | Papadc1b      | 30489                          | 770746  | 1.798686862                  | up                            |
| MACS_Peak_619        | 18                    | 9.06                            | Cgln1         | 880                            | 5570736 | 1.691678286                  | up                            |
| MACS_Peak_112        | 23                    | 9.46                            | Hs1bp3        | 73072                          | 520711  | 1.551209569                  | up                            |
| MACS_Peak_334        | 26                    | 7.45                            | Bcas1         | 119591                         | 6560347 | 1.657806396                  | down                          |
| MACS_Peak_490        | 150                   | 6.87                            | Smo           | 13391                          | 2810440 | 1.552044272                  | up                            |
| MACS_Peak_401        | 20                    | 7.78                            | Gja4          | 4784                           | 770672  | 2.194069386                  | up                            |
| MACS_Peak_528        | 21                    | 8.46                            | Sox5          | 268126                         | 4880553 | 4.62940979                   | down                          |
| MACS_Peak_529        | 21                    | 7.25                            | Sox5          | 170042                         | 4880553 | 4.62940979                   | down                          |
| MACS_Peak_530        | 29                    | 12.69                           | Sox5          | 166366                         | 4880553 | 4.62940979                   | down                          |
| MACS_Peak_531        | 76                    | 28.21                           | Sox5          | 584                            | 4880553 | 4.62940979                   | down                          |
| MACS_Peak_532        | 38                    | 16.5                            | Sox5          | 55278                          | 4880553 | 4.62940979                   | down                          |
| MACS_Peak_533        | 23                    | 6.39                            | Sox5          | 250705                         | 4880553 | 4.62940979                   | down                          |
| MACS_Peak_528        | 21                    | 8.46                            | Sox5          | 268126                         | 5050082 | 6.362275124                  | down                          |
| MACS_Peak_529        | 21                    | 7.25                            | Sox5          | 170042                         | 5050082 | 6.362275124                  | down                          |
| MACS_Peak_530        | 29                    | 12.69                           | Sox5          | 166366                         | 5050082 | 6.362275124                  | down                          |
| MACS_Peak_531        | 76                    | 28.21                           | Sox5          | 584                            | 5050082 | 6.362275124                  | down                          |
| MACS_Peak_532        | 38                    | 16.5                            | Sox5          | 55278                          | 5050082 | 6.362275124                  | down                          |
| MACS_Peak_533        | 23                    | 6.39                            | Sox5          | 250705                         | 5050082 | 6.362275124                  | down                          |
| MACS_Peak_528        | 21                    | 8.46                            | Sox5          | 268126                         | 6020273 | 2.341292381                  | down                          |
| MACS_Peak_529        | 21                    | 7.25                            | Sox5          | 170042                         | 6020273 | 2.341292381                  | down                          |
| MACS_Peak_530        | 29                    | 12.69                           | Sox5          | 166366                         | 6020273 | 2.341292381                  | down                          |
| MACS_Peak_531        | 76                    | 28.21                           | Sox5          | 584                            | 6020273 | 2.341292381                  | down                          |
| MACS_Peak_532        | 38                    | 16.5                            | Sox5          | 55278                          | 6020273 | 2.341292381                  | down                          |
| MACS_Peak_533        | 23                    | 6.39                            | Sox5          | 250705                         | 6020273 | 2.341292381                  | down                          |
| MACS_Peak_189        | 17                    | 5.44                            | Iitm2b        | 61269                          | 2970286 | 1.63623178                   | up                            |
| MACS_Peak_611        | 20                    | 7.1                             | Sorl1         | 188534                         | 6960577 | 1.710558295                  | down                          |
| MACS_Peak_436        | 17                    | 6.65                            | Phox2b        | 19237                          | 6220736 | 1.636369348                  | up                            |
| MACS_Peak_34         | 24                    | 5.32                            | Dusp10        | 249166                         | 2000494 | 1.548292041                  | up                            |
| MACS_Peak_182        | 17                    | 7.25                            | Gjb6          | 28275                          | 610746  | 2.173983812                  | up                            |
| MACS_Peak_440        | 18                    | 6.65                            | Lphn3         | 1732                           | 4260348 | 1.501995325                  | up                            |
| MACS_Peak_441        | 18                    | 6.65                            | Lphn3         | 481084                         | 4260348 | 1.501995325                  | up                            |
| MACS_Peak_58         | 17                    | 6.04                            | Col18a1       | 2785                           | 3450066 | 2.501227617                  | up                            |
| MACS_Peak_58         | 17                    | 6.04                            | Col18a1       | 2785                           | 5690270 | 2.608283281                  | up                            |
| MACS_Peak_258        | 210                   | 5                               | Gpsm3         | 2898                           | 3850221 | 1.547520876                  | up                            |
| MACS_Peak_152        | 16                    | 6.04                            | Neurog1       | 185                            | 4610541 | 1.684467912                  | up                            |
| MACS_Peak_363        | 15                    | 8.46                            | Palmd         | 194182                         | 1440300 | 2.522102594                  | up                            |
| MACS_Peak_528        | 21                    | 8.46                            | Sox5          | 268126                         | 6200707 | 1.902192593                  | down                          |
| MACS_Peak_529        | 21                    | 7.25                            | Sox5          | 170042                         | 6200707 | 1.902192593                  | down                          |
| MACS_Peak_530        | 29                    | 12.69                           | Sox5          | 166366                         | 6200707 | 1.902192593                  | down                          |
| MACS_Peak_531        | 76                    | 28.21                           | Sox5          | 584                            | 6200707 | 1.902192593                  | down                          |
| MACS_Peak_532        | 38                    | 16.5                            | Sox5          | 55278                          | 6200707 | 1.902192593                  | down                          |
| MACS_Peak_533        | 23                    | 6.39                            | Sox5          | 250705                         | 6200707 | 1.902192593                  | down                          |
| MACS_Peak_387        | 18                    | 6.04                            | 4930473A06Rik | 244121                         | 7150079 | 1.749178767                  | up                            |
| MACS_Peak_164        | 21                    | 7.26                            | Cartpt        | 109674                         | 4050706 | 1.640872955                  | up                            |
| MACS_Peak_321        | 19                    | 9.06                            | Nat10         | 54876                          | 2120132 | 1.53066957                   | up                            |
| MACS_Peak_327        | 28                    | 12.42                           | Sic24a3       | 50414                          | 4280131 | 1.602561235                  | up                            |
| MACS_Peak_62         | 53                    | 15.71                           | Chst11        | 57359                          | 3390678 | 1.832973957                  | down                          |
| MACS_Peak_66         | 17                    | 5.92                            | Grip1         | 114771                         | 3460382 | 1.532074928                  | down                          |
| MACS_Peak_81         | 22                    | 6.29                            | Pmp22         | 46693                          | 2480129 | 1.897400498                  | up                            |
| MACS_Peak_402        | 18                    | 5.32                            | Zscan20       | 143775                         | 3170601 | 1.565991044                  | up                            |
| MACS_Peak_403        | 18                    | 5.44                            | Matn1         | 77913                          | 4280487 | 17.49271202                  | down                          |
| MACS_Peak_23         | 15                    | 7.86                            | Lypd1         | 73669                          | 6020358 | 2.41830349                   | up                            |
| MACS_Peak_55         | 21                    | 6.65                            | Ank3          | 17941                          | 6020176 | 2.969679832                  | down                          |
| MACS_Peak_54         | 17                    | 5.86                            | Ank3          | 134939                         | 6020176 | 2.969679832                  | down                          |
| MACS_Peak_407        | 24                    | 7.25                            | Clic4         | 50556                          | 3400491 | 1.885798573                  | down                          |
| MACS_Peak_394        | 17                    | 6.65                            | Ssbp3         | 45861                          | 1340349 | 1.716467619                  | down                          |
| MACS_Peak_492        | 39                    | 18.73                           | Chchd3        | 237                            | 7550743 | 1.594190598                  | up                            |
| MACS_Peak_522        | 26                    | 9.06                            | Atf7ip        | 48344                          | 5690451 | 1.804197907                  | down                          |
| MACS_Peak_269        | 17                    | 6.65                            | Dlgap1        | 72117                          | 6250102 | 1.693743587                  | up                            |
| MACS_Peak_42         | 19                    | 7.25                            | Map3k5        | 33465                          | 5550112 | 1.780693173                  | up                            |

|               |    |       |               |         |         |             |      |
|---------------|----|-------|---------------|---------|---------|-------------|------|
| MACS_PEAK_88  | 36 | 9.06  | Tbx2          | 153812  | 670367  | 1.751884937 | up   |
| MACS_PEAK_264 | 16 | 8.03  | Efna5         | 18358   | 6840577 | 1.599610806 | up   |
| MACS_PEAK_265 | 24 | 7.1   | Efna5         | 286000  | 6840577 | 1.599610806 | up   |
| MACS_PEAK_612 | 34 | 9.46  | Mil1          | 84      | 2100364 | 2.11644125  | down |
| MACS_PEAK_333 | 19 | 7.86  | Atp9a         | 28071   | 670414  | 1.946009755 | up   |
| MACS_PEAK_333 | 19 | 7.86  | Atp9a         | 28071   | 1510364 | 1.845288873 | up   |
| MACS_PEAK_212 | 18 | 6.51  | Mpped1        | 17542   | 430296  | 1.53749311  | up   |
| MACS_PEAK_117 | 39 | 15.71 | Rnf144a       | 1166967 | 5690609 | 1.957864404 | down |
| MACS_PEAK_277 | 16 | 7.25  | Arhgap12      | 696     | 5340156 | 1.598216772 | up   |
| MACS_PEAK_35  | 33 | 11.24 | Tgfb2         | 64805   | 770754  | 4.134972572 | down |
| MACS_PEAK_64  | 20 | 5.32  | Frs2          | 14371   | 7560195 | 1.629254341 | up   |
| MACS_PEAK_199 | 15 | 7.25  | Pdzd2         | 12273   | 6350241 | 1.697885036 | up   |
| MACS_PEAK_53  | 19 | 6.04  | Rtkn2         | 116971  | 1300438 | 1.669357896 | up   |
| MACS_PEAK_67  | 22 | 7.1   | Hmga2         | 979     | 160270  | 2.009763241 | down |
| MACS_PEAK_68  | 27 | 10.65 | Hmga2         | 76102   | 160270  | 2.009763241 | down |
| MACS_PEAK_443 | 32 | 5.7   | G3bp2         | 49      | 4230681 | 2.240312576 | down |
| MACS_PEAK_28  | 17 | 6.65  | Rgs16         | 80463   | 3890528 | 1.761289358 | up   |
| MACS_PEAK_508 | 26 | 8.71  | Tia1          | 377     | 3060544 | 1.673606753 | up   |
| MACS_PEAK_152 | 16 | 6.04  | Cxcl14        | 44573   | 3520349 | 1.843580723 | up   |
| MACS_PEAK_241 | 16 | 6.04  | Setd4         | 24083   | 3120605 | 1.749804497 | up   |
| MACS_PEAK_288 | 19 | 7.25  | Tcf4          | 367903  | 7550360 | 1.630245209 | down |
| MACS_PEAK_384 | 21 | 9.67  | Olfir267      | 62845   | 3780519 | 1.562190294 | up   |
| MACS_PEAK_349 | 20 | 6.78  | Foxo1         | 71776   | 6580682 | 2.203903913 | up   |
| MACS_PEAK_518 | 24 | 10.27 | Ing4          | 3       | 6550408 | 1.596772075 | up   |
| MACS_PEAK_548 | 22 | 7.76  | Sox6          | 623788  | 4070386 | 2.446631193 | down |
| MACS_PEAK_549 | 33 | 13.9  | Sox6          | 379306  | 4070386 | 2.446631193 | down |
| MACS_PEAK_377 | 18 | 6.51  | Glipr2        | 7471    | 4120687 | 1.686236024 | up   |
| MACS_PEAK_510 | 26 | 9.58  | Magi1         | 664     | 2760328 | 1.938788414 | up   |
| MACS_PEAK_511 | 19 | 5.12  | Magi1         | 100151  | 2760328 | 1.938788414 | up   |
| MACS_PEAK_512 | 37 | 10.65 | Magi1         | 90      | 2760328 | 1.938788414 | up   |
| MACS_PEAK_119 | 21 | 7.25  | Egln3         | 26981   | 2750326 | 1.56449306  | down |
| MACS_PEAK_41  | 22 | 6.87  | Cited2        | 648270  | 6020379 | 1.539243817 | down |
| MACS_PEAK_41  | 22 | 6.87  | Cited2        | 648270  | 5860538 | 1.61139214  | down |
| MACS_PEAK_158 | 18 | 7.86  | 201011101Rik  | 21044   | 3520092 | 1.647946477 | up   |
| MACS_PEAK_118 | 17 | 6.65  | Sox11         | 233059  | 990681  | 2.488309383 | down |
| MACS_PEAK_568 | 21 | 7.86  | Zfp703        | 202015  | 380717  | 1.685684443 | up   |
| MACS_PEAK_354 | 17 | 6.04  | Fstl5         | 20      | 2340192 | 4.335448742 | down |
| MACS_PEAK_214 | 21 | 7.1   | Pfhl2b        | 23918   | 5900551 | 1.757664919 | down |
| MACS_PEAK_223 | 20 | 7.25  | Tnxdc11       | 9554    | 3390343 | 1.518350482 | up   |
| MACS_PEAK_2   | 17 | 5.44  | B3gat2        | 40292   | 4920474 | 1.510452867 | up   |
| MACS_PEAK_273 | 24 | 7.02  | Ppm1b         | 9473    | 7650044 | 1.824744344 | up   |
| MACS_PEAK_87  | 17 | 5.44  | Rab34         | 630     | 1780025 | 1.829192758 | up   |
| MACS_PEAK_363 | 15 | 8.46  | Palmd         | 194182  | 5080279 | 2.123199224 | up   |
| MACS_PEAK_11  | 19 | 7.45  | Nab1          | 100     | 1300709 | 1.537516475 | up   |
| MACS_PEAK_11  | 19 | 7.45  | Nab1          | 100     | 730736  | 1.925327063 | up   |
| MACS_PEAK_175 | 33 | 9.45  | Zmiz1         | 81032   | 5670523 | 2.562799931 | down |
| MACS_PEAK_176 | 27 | 8.46  | Zmiz1         | 1556    | 5670523 | 2.562799931 | down |
| MACS_PEAK_174 | 23 | 5.44  | Zmiz1         | 572451  | 5670523 | 2.562799931 | down |
| MACS_PEAK_389 | 18 | 9.06  | Cdkn2b        | 179838  | 5550240 | 1.740302086 | up   |
| MACS_PEAK_159 | 46 | 4.45  | Irx2          | 67017   | 2970008 | 1.736776829 | up   |
| MACS_PEAK_109 | 24 | 6.37  | Tmc6          | 31304   | 7100300 | 2.330271721 | up   |
| MACS_PEAK_109 | 24 | 6.37  | Tmc6          | 31304   | 5490079 | 2.286953688 | up   |
| MACS_PEAK_109 | 24 | 6.37  | Tmc6          | 31304   | 7570475 | 2.202062845 | up   |
| MACS_PEAK_128 | 20 | 6.04  | Galc          | 1428224 | 1500201 | 1.791874766 | up   |
| MACS_PEAK_376 | 15 | 6.04  | Cnr1          | 132     | 1440647 | 1.51412046  | up   |
| MACS_PEAK_272 | 19 | 7.45  | Qpct          | 128797  | 990687  | 2.19092536  | up   |
| MACS_PEAK_518 | 24 | 10.27 | Ing4          | 3       | 4210168 | 1.761608839 | up   |
| MACS_PEAK_558 | 29 | 13.9  | Mgmt          | 551537  | 3890072 | 1.876641154 | up   |
| MACS_PEAK_94  | 35 | 12.42 | Rara          | 21130   | 2940561 | 1.639087081 | up   |
| MACS_PEAK_134 | 16 | 5.44  | Kif26a        | 18048   | 4070731 | 1.76064384  | up   |
| MACS_PEAK_152 | 16 | 6.04  | Cxcl14        | 44573   | 150746  | 1.5744313   | up   |
| MACS_PEAK_268 | 17 | 6.51  | Arhgap28      | 133     | 6100468 | 1.562302589 | up   |
| MACS_PEAK_43  | 22 | 9.06  | Hbs1l         | 37866   | 50279   | 1.552370071 | up   |
| MACS_PEAK_142 | 22 | 5.92  | Lyst          | 164966  | 4640102 | 1.550898194 | up   |
| MACS_PEAK_226 | 33 | 12.09 | Leprel1       | 17926   | 6330086 | 1.809220314 | up   |
| MACS_PEAK_577 | 47 | 12.87 | Ednra         | 12919   | 4040189 | 2.376912355 | up   |
| MACS_PEAK_453 | 35 | 9.06  | Ttc28         | 27266   | 2370762 | 3.188261271 | down |
| MACS_PEAK_279 | 18 | 7.25  | Asxl3         | 1110    | 4230167 | 3.112105608 | down |
| MACS_PEAK_422 | 33 | 12.62 | Arhgef16      | 13557   | 4850719 | 1.68380928  | up   |
| MACS_PEAK_113 | 16 | 4.83  | Laptn4a       | 77529   | 5560411 | 2.131327391 | up   |
| MACS_PEAK_388 | 27 | 8.52  | Milt3         | 112487  | 1110112 | 1.572801113 | down |
| MACS_PEAK_522 | 26 | 9.06  | Atf7ip        | 48344   | 4570709 | 3.180575371 | down |
| MACS_PEAK_471 | 21 | 5.13  | Foxk1         | 33563   | 1510273 | 1.6241889   | up   |
| MACS_PEAK_242 | 20 | 6.51  | Dscr3         | 16458   | 4280768 | 1.569319129 | up   |
| MACS_PEAK_7   | 27 | 6.29  | 2010300C02Rik | 32099   | 3370465 | 1.583681583 | up   |
| MACS_PEAK_90  | 22 | 8.46  | Rad51c        | 18675   | 3360253 | 1.950005174 | down |
| MACS_PEAK_91  | 24 | 5.77  | Rad51c        | 39159   | 3360253 | 1.950005174 | down |
| MACS_PEAK_127 | 17 | 7.86  | 1700020003Rik | 126525  | 5910056 | 2.101079941 | down |
| MACS_PEAK_497 | 25 | 7.86  | Nfe2l3        | 70786   | 2480204 | 1.547719479 | up   |
| MACS_PEAK_615 | 21 | 8.97  | Thsd4         | 70866   | 630608  | 2.118721247 | down |
| MACS_PEAK_615 | 21 | 8.97  | Thsd4         | 70866   | 1770086 | 3.020121813 | down |
| MACS_PEAK_123 | 56 | 6.16  | Syne2         | 14944   | 5090056 | 3.046834946 | down |
| MACS_PEAK_123 | 56 | 6.16  | Syne2         | 14944   | 5490386 | 1.561118126 | down |
| MACS_PEAK_141 | 30 | 6.09  | Actn2         | 44824   | 1050678 | 1.730874062 | up   |
| MACS_PEAK_38  | 21 | 7     | Hhat          | 76234   | 6400195 | 1.552055717 | up   |
| MACS_PEAK_462 | 17 | 5.92  | Auts2         | 115998  | 2340097 | 3.004128218 | down |
| MACS_PEAK_448 | 18 | 8.37  | Zfp326        | 49948   | 6510524 | 2.000721216 | down |
| MACS_PEAK_449 | 19 | 5.49  | Zfp326        | 201     | 6510524 | 2.000721216 | down |
| MACS_PEAK_448 | 18 | 8.37  | Zfp326        | 49948   | 4230735 | 2.138542891 | down |
| MACS_PEAK_449 | 19 | 5.49  | Zfp326        | 201     | 4230735 | 2.138542891 | down |
| MACS_PEAK_238 | 57 | 11.47 | D16Erttd472e  | 95      | 4780112 | 1.583073974 | down |
| MACS_PEAK_9   | 23 | 7.25  | Ercs5         | 587     | 4260296 | 1.576063037 | down |
| MACS_PEAK_205 | 21 | 7.25  | Oxr1          | 35      | 5220685 | 1.74464941  | up   |
| MACS_PEAK_56  | 26 | 5.81  | Phyhlpl       | 124533  | 3800035 | 3.186303616 | down |
| MACS_PEAK_143 | 23 | 5.32  | Sox4          | 544575  | 1850315 | 1.783293724 | down |
| MACS_PEAK_86  | 19 | 5.32  | Traf4         | 1439    | 1470632 | 1.509787679 | down |
| MACS_PEAK_105 | 23 | 8.46  | BC006965      | 448     | 780594  | 1.501077652 | up   |

|               |     |       |               |         |         |             |      |
|---------------|-----|-------|---------------|---------|---------|-------------|------|
| MACS_PEAK_184 | 17  | 6.04  | Scara5        | 37083   | 160377  | 2.956916332 | up   |
| MACS_PEAK_117 | 39  | 15.71 | Id2           | 152197  | 1030519 | 4.620919704 | down |
| MACS_PEAK_564 | 19  | 8.28  | Col4a1        | 147024  | 4060102 | 2.682374954 | up   |
| MACS_PEAK_381 | 21  | 7.25  | Slc44a1       | 5       | 7380195 | 1.802622199 | up   |
| MACS_PEAK_381 | 21  | 7.25  | Slc44a1       | 5       | 290360  | 2.06903863  | up   |
| MACS_PEAK_306 | 19  | 5.44  | Atrn1         | 315566  | 70356   | 3.97765851  | down |
| MACS_PEAK_323 | 18  | 5.92  | Tmco5         | 97281   | 7330520 | 1.612348199 | up   |
| MACS_PEAK_83  | 17  | 6.52  | Myh10         | 53356   | 7040608 | 1.665982604 | up   |
| MACS_PEAK_109 | 24  | 6.37  | Tnrc6c        | 95028   | 2370484 | 1.673379421 | down |
| MACS_PEAK_377 | 18  | 6.51  | Glpr2         | 7471    | 3940639 | 1.803641558 | up   |
| MACS_PEAK_75  | 21  | 6.58  | Ppp2ca        | 180     | 4590746 | 1.536321878 | up   |
| MACS_PEAK_136 | 16  | 8.46  | Dnahc11       | 154636  | 4220139 | 1.538279057 | up   |
| MACS_PEAK_573 | 18  | 7.32  | Gpm6a         | 160146  | 7400240 | 1.517501831 | up   |
| MACS_PEAK_150 | 20  | 9.06  | S1pr3         | 149321  | 4920349 | 1.749848127 | up   |
| MACS_PEAK_10  | 38  | 8.43  | Myo1b         | 80859   | 4920215 | 2.869684696 | down |
| MACS_PEAK_391 | 18  | 5.44  | Sgip1         | 32698   | 3310474 | 1.610694766 | up   |
| MACS_PEAK_164 | 21  | 7.26  | Mtap1b        | 274407  | 5810332 | 2.097805023 | down |
| MACS_PEAK_101 | 39  | 9.23  | Helz          | 373     | 6550270 | 2.738566616 | down |
| MACS_PEAK_351 | 18  | 7.25  | Mbnl1         | 234918  | 5090156 | 1.676026583 | down |
| MACS_PEAK_404 | 21  | 9.06  | Ptpu          | 384315  | 5270161 | 2.411968231 | up   |
| MACS_PEAK_438 | 22  | 7.86  | Rasl11b       | 70991   | 150372  | 1.523000121 | up   |
| MACS_PEAK_438 | 22  | 7.86  | Rasl11b       | 70991   | 290341  | 2.123251438 | up   |
| MACS_PEAK_44  | 17  | 6.04  | Epb4.1l2      | 45032   | 3870452 | 1.960246444 | down |
| MACS_PEAK_361 | 21  | 5.32  | Trim45        | 10480   | 4640719 | 1.639558554 | up   |
| MACS_PEAK_231 | 140 | 4.32  | Abi3bp        | 85059   | 4490730 | 2.414456606 | up   |
| MACS_PEAK_447 | 26  | 7.99  | Mapk10        | 197150  | 4610411 | 2.018272877 | down |
| MACS_PEAK_347 | 31  | 10.65 | Elf2          | 36691   | 1780050 | 1.779895663 | down |
| MACS_PEAK_347 | 31  | 10.65 | Elf2          | 36691   | 130386  | 1.971977711 | down |
| MACS_PEAK_15  | 22  | 5.86  | Klf7          | 893     | 4850367 | 2.45822978  | down |
| MACS_PEAK_27  | 26  | 8.46  | Hmnc1         | 177150  | 1450347 | 2.41880703  | up   |
| MACS_PEAK_26  | 16  | 7.86  | Hmnc1         | 340383  | 1450347 | 2.41880703  | up   |
| MACS_PEAK_293 | 20  | 7.99  | Tshz1         | 231497  | 5810184 | 2.919794083 | down |
| MACS_PEAK_579 | 30  | 10.06 | Gipc1         | 152     | 1090468 | 1.569516063 | up   |
| MACS_PEAK_42  | 19  | 7.25  | Map3k5        | 33465   | 6380068 | 1.551097274 | up   |
| MACS_PEAK_446 | 18  | 7.25  | Wdfy3         | 178678  | 1740220 | 1.845359206 | down |
| MACS_PEAK_61  | 19  | 9.06  | Matk          | 218     | 1940646 | 1.540915251 | up   |
| MACS_PEAK_556 | 21  | 6.65  | Zfp668        | 1063    | 5860280 | 1.656523585 | down |
| MACS_PEAK_332 | 19  | 7.86  | Eya2          | 2690    | 2100750 | 1.58567214  | up   |
| MACS_PEAK_316 | 20  | 6.16  | Gad1          | 99227   | 830437  | 4.026839256 | down |
| MACS_PEAK_624 | 18  | 7.25  | Osbpl10       | 140998  | 1690040 | 1.558575511 | up   |
| MACS_PEAK_605 | 51  | 12.1  | Fbxl12        | 475     | 2690437 | 1.704402566 | up   |
| MACS_PEAK_199 | 15  | 7.25  | 6030458C11Rik | 244374  | 6400136 | 2.476020098 | down |
| MACS_PEAK_316 | 20  | 6.16  | Gad1          | 99227   | 4920243 | 3.517460346 | down |
| MACS_PEAK_569 | 26  | 9.2   | Pdlim3        | 223673  | 650452  | 2.682033539 | up   |
| MACS_PEAK_523 | 61  | 10.11 | Aebp2         | 348364  | 610020  | 1.723865151 | up   |
| MACS_PEAK_335 | 25  | 9.05  | Pfdn4         | 52417   | 4590750 | 4.021124363 | down |
| MACS_PEAK_403 | 18  | 5.44  | Ptpu          | 815980  | 3170735 | 2.041645288 | up   |
| MACS_PEAK_429 | 18  | 5.45  | Nos3          | 39066   | 6290328 | 1.930089355 | up   |
| MACS_PEAK_429 | 18  | 5.45  | Nos3          | 39066   | 7570647 | 2.211401463 | up   |
| MACS_PEAK_563 | 30  | 7.74  | Tnfsf13b      | 401151  | 6840059 | 1.609321356 | up   |
| MACS_PEAK_390 | 17  | 6.65  | Nfia          | 331212  | 130544  | 1.942586541 | up   |
| MACS_PEAK_563 | 30  | 7.74  | Tnfsf13b      | 401151  | 610661  | 1.764905214 | up   |
| MACS_PEAK_619 | 18  | 9.06  | Tcf12         | 339337  | 5080356 | 4.621706009 | down |
| MACS_PEAK_258 | 210 | 5     | Notch4        | 22613   | 4250059 | 2.045795679 | up   |
| MACS_PEAK_202 | 18  | 9.67  | Stk3          | 233926  | 5270402 | 2.437416553 | up   |
| MACS_PEAK_204 | 19  | 7.86  | Grhl2         | 201175  | 5340731 | 1.951004982 | up   |
| MACS_PEAK_269 | 17  | 6.65  | Tgif1         | 212913  | 7050228 | 1.705920577 | up   |
| MACS_PEAK_269 | 17  | 6.65  | Tgif1         | 212913  | 1090100 | 2.285291433 | up   |
| MACS_PEAK_199 | 15  | 7.25  | 6030458C11Rik | 244374  | 2260148 | 2.817769766 | down |
| MACS_PEAK_471 | 21  | 5.13  | Sdk1          | 1126400 | 380463  | 2.000249386 | up   |
| MACS_PEAK_316 | 20  | 6.16  | Gad1          | 99227   | 7550053 | 3.400148869 | down |
| MACS_PEAK_292 | 21  | 6.04  | Nfatc1        | 135965  | 70392   | 2.159632921 | up   |
| MACS_PEAK_292 | 21  | 6.04  | Nfatc1        | 135965  | 7160220 | 2.385699749 | up   |
| MACS_PEAK_290 | 28  | 6.21  | Acaa2         | 112135  | 3310424 | 2.013747454 | up   |
| MACS_PEAK_210 | 33  | 5.32  | Sox10         | 28757   | 4260301 | 4.689880848 | up   |
| MACS_PEAK_602 | 20  | 6.51  | Birc2         | 71007   | 6040647 | 1.747507811 | up   |
| MACS_PEAK_614 | 18  | 6.04  | Stoml1        | 5870    | 5960014 | 1.722013474 | up   |
| MACS_PEAK_358 | 16  | 6.78  | Prpf3         | 36043   | 1440025 | 1.823522449 | up   |
| MACS_PEAK_543 | 30  | 10.88 | Iqgap1        | 57613   | 4830538 | 2.730445385 | down |
| MACS_PEAK_525 | 43  | 18.13 | Sox5          | 709796  | 4880553 | 4.62940979  | down |
| MACS_PEAK_526 | 25  | 7.25  | Sox5          | 678621  | 4880553 | 4.62940979  | down |
| MACS_PEAK_527 | 23  | 7.86  | Sox5          | 518337  | 4880553 | 4.62940979  | down |
| MACS_PEAK_525 | 43  | 18.13 | Sox5          | 709796  | 5050082 | 6.362275124 | down |
| MACS_PEAK_526 | 25  | 7.25  | Sox5          | 678621  | 5050082 | 6.362275124 | down |
| MACS_PEAK_527 | 23  | 7.86  | Sox5          | 518337  | 5050082 | 6.362275124 | down |
| MACS_PEAK_525 | 43  | 18.13 | Sox5          | 709796  | 6020273 | 2.341292381 | down |
| MACS_PEAK_526 | 25  | 7.25  | Sox5          | 678621  | 6020273 | 2.341292381 | down |
| MACS_PEAK_527 | 23  | 7.86  | Sox5          | 518337  | 6020273 | 2.341292381 | down |
| MACS_PEAK_606 | 41  | 6.47  | A230050P20Rik | 31347   | 2690091 | 1.616741896 | up   |
| MACS_PEAK_606 | 41  | 6.47  | A230050P20Rik | 31347   | 6940132 | 1.528307199 | up   |
| MACS_PEAK_589 | 20  | 6.65  | Cdh5          | 830811  | 1230129 | 2.108512402 | up   |
| MACS_PEAK_525 | 43  | 18.13 | Sox5          | 709796  | 6200707 | 1.902192593 | down |
| MACS_PEAK_526 | 25  | 7.25  | Sox5          | 678621  | 6200707 | 1.902192593 | down |
| MACS_PEAK_527 | 23  | 7.86  | Sox5          | 518337  | 6200707 | 1.902192593 | down |
| MACS_PEAK_582 | 18  | 5.49  | Trmt1         | 12123   | 7550240 | 1.576895714 | up   |
| MACS_PEAK_309 | 23  | 6.44  | Cdc123        | 277601  | 7560326 | 3.020993233 | down |
| MACS_PEAK_404 | 21  | 9.06  | Matn1         | 509578  | 4280487 | 17.49271202 | down |
| MACS_PEAK_406 | 29  | 9.05  | Clic4         | 106100  | 3400491 | 1.885798573 | down |
| MACS_PEAK_521 | 24  | 9.67  | Atf7ip        | 52786   | 5690451 | 1.804197907 | down |
| MACS_PEAK_421 | 16  | 7.1   | Ajap1         | 434847  | 2650731 | 1.863787413 | up   |
| MACS_PEAK_444 | 18  | 8.46  | Shroom3       | 81837   | 2370471 | 1.598723769 | up   |
| MACS_PEAK_523 | 61  | 10.11 | Aebp2         | 348364  | 6350767 | 1.849905491 | up   |
| MACS_PEAK_425 | 33  | 7.26  | Ski           | 27051   | 1940689 | 1.679907203 | down |
| MACS_PEAK_548 | 22  | 7.76  | Insc          | 625532  | 3520397 | 6.45871973  | up   |
| MACS_PEAK_192 | 17  | 7.25  | 1300010F03Rik | 285952  | 4670397 | 1.556489348 | up   |
| MACS_PEAK_574 | 22  | 9.67  | Mef2b         | 19556   | 6020243 | 1.606473804 | up   |
| MACS_PEAK_625 | 18  | 6.65  | Rbms3         | 867910  | 70497   | 2.295167208 | down |



|               |     |       |               |         |         |             |      |
|---------------|-----|-------|---------------|---------|---------|-------------|------|
| MACS_PEAK_626 | 17  | 7.86  | Rbms3         | 781450  | 70497   | 2.295167208 | down |
| MACS_PEAK_308 | 374 | 2.55  | Csf2ra        | 28660   | 5550437 | 1.566088319 | up   |
| MACS_PEAK_193 | 17  | 7.25  | Ndfip2        | 329701  | 2940196 | 3.606239796 | down |
| MACS_PEAK_282 | 26  | 7.1   | Yipf5         | 88836   | 7160402 | 2.609052896 | down |
| MACS_PEAK_197 | 16  | 6.04  | Lifr          | 194784  | 5360220 | 1.614066362 | up   |
| MACS_PEAK_198 | 21  | 9.06  | Lifr          | 152783  | 5360220 | 1.614066362 | up   |
| MACS_PEAK_197 | 16  | 6.04  | Lifr          | 194784  | 670634  | 1.600601077 | up   |
| MACS_PEAK_198 | 21  | 9.06  | Lifr          | 152783  | 670634  | 1.600601077 | up   |
| MACS_PEAK_283 | 25  | 6.3   | Ythdc2        | 731010  | 7650424 | 1.631167531 | up   |
| MACS_PEAK_312 | 40  | 9.25  | St6galnac6    | 14368   | 6180452 | 1.534910202 | up   |
| MACS_PEAK_473 | 23  | 7.73  | Fbxl18        | 77384   | 7210066 | 1.584769487 | down |
| MACS_PEAK_474 | 31  | 5.02  | Fbxl18        | 74819   | 7210066 | 1.584769487 | down |
| MACS_PEAK_475 | 31  | 7.78  | Fbxl18        | 71724   | 7210066 | 1.584769487 | down |
| MACS_PEAK_274 | 16  | 7.25  | Srbd1         | 290838  | 1500202 | 2.141215324 | down |
| MACS_PEAK_610 | 17  | 6.65  | Robo4         | 17373   | 2630333 | 1.980917573 | up   |
| MACS_PEAK_571 | 31  | 5.8   | D030016E14Rik | 244986  | 1030670 | 1.598960757 | up   |
| MACS_PEAK_266 | 29  | 8.87  | Ptprm         | 255587  | 1580484 | 1.672431231 | up   |
| MACS_PEAK_369 | 17  | 6.04  | Mcoln3        | 15056   | 50487   | 2.695793152 | up   |
| MACS_PEAK_226 | 33  | 12.09 | Clon1         | 283981  | 3450300 | 2.176027298 | up   |
| MACS_PEAK_479 | 22  | 8.46  | B3galtl       | 329495  | 5270315 | 1.861565471 | up   |
| MACS_PEAK_594 | 32  | 7.25  | Pfeg2         | 162431  | 1940255 | 1.661407828 | up   |
| MACS_PEAK_600 | 17  | 7.99  | Pard3         | 535145  | 3400343 | 1.587090254 | up   |
| MACS_PEAK_524 | 19  | 5.79  | St8sia1       | 89124   | 2340609 | 1.859755993 | down |
| MACS_PEAK_251 | 63  | 5.34  | Mlit4         | 152524  | 6940136 | 3.550232172 | down |
| MACS_PEAK_252 | 15  | 7.86  | Mlit4         | 151696  | 6940136 | 3.550232172 | down |
| MACS_PEAK_251 | 63  | 5.34  | Mlit4         | 152524  | 1260519 | 1.815965772 | down |
| MACS_PEAK_252 | 15  | 7.86  | Mlit4         | 151696  | 1260519 | 1.815965772 | down |
| MACS_PEAK_488 | 21  | 7.86  | Ptprz1        | 298115  | 1690239 | 1.955455542 | down |
| MACS_PEAK_222 | 57  | 5.81  | Snn           | 53570   | 6110750 | 1.511974692 | up   |
| MACS_PEAK_481 | 17  | 7.25  | Stard13       | 204236  | 4730079 | 1.853927612 | up   |
| MACS_PEAK_429 | 18  | 5.45  | Nos3          | 39066   | 4570066 | 2.049824476 | up   |
| MACS_PEAK_346 | 23  | 6.8   | Slc7a11       | 686106  | 5080369 | 1.922748923 | up   |
| MACS_PEAK_521 | 24  | 9.67  | Atf7ip        | 52786   | 4570709 | 3.180575371 | down |
| MACS_PEAK_470 | 18  | 6.04  | Foxk1         | 654922  | 1510273 | 1.6241889   | up   |
| MACS_PEAK_500 | 19  | 7.1   | Jazf1         | 114226  | 2070612 | 1.949540854 | up   |
| MACS_PEAK_513 | 16  | 6.65  | Frmtd4b       | 364260  | 5050403 | 2.866351604 | down |
| MACS_PEAK_206 | 23  | 7.86  | Nsmce2        | 246811  | 7400431 | 1.582140684 | down |
| MACS_PEAK_200 | 36  | 8.69  | Cdh6          | 2219237 | 520544  | 4.927514076 | up   |
| MACS_PEAK_388 | 27  | 8.52  | BC057079      | 173710  | 6840592 | 1.598837972 | up   |
| MACS_PEAK_374 | 23  | 9.06  | Epha7         | 3271151 | 4670148 | 2.36863327  | up   |
| MACS_PEAK_374 | 23  | 9.06  | Epha7         | 3271151 | 7050327 | 1.909336686 | up   |
| MACS_PEAK_446 | 18  | 7.25  | Arhgap24      | 232792  | 6550470 | 1.760208368 | up   |
| MACS_PEAK_383 | 17  | 9.06  | Svep1         | 98140   | 630292  | 1.949231148 | up   |
| MACS_PEAK_280 | 16  | 6.58  | Zfp397        | 150529  | 6560390 | 1.554591537 | up   |
| MACS_PEAK_290 | 28  | 6.21  | Acaa2         | 112135  | 4010398 | 2.12840867  | up   |
| MACS_PEAK_290 | 28  | 6.21  | Acaa2         | 112135  | 5090414 | 2.446219921 | up   |
| MACS_PEAK_460 | 21  | 6.1   | Auts2         | 831430  | 2340097 | 3.004128218 | down |
| MACS_PEAK_461 | 21  | 7.86  | Auts2         | 691283  | 2340097 | 3.004128218 | down |
| MACS_PEAK_523 | 61  | 10.11 | Aebp2         | 348364  | 4200086 | 1.62104094  | up   |
| MACS_PEAK_450 | 24  | 8.87  | Zfp326        | 384900  | 6510524 | 2.000721216 | down |
| MACS_PEAK_450 | 24  | 8.87  | Zfp326        | 384900  | 4230735 | 2.138542891 | down |
| MACS_PEAK_578 | 22  | 8.46  | Il15          | 634971  | 6940402 | 1.798205018 | up   |
| MACS_PEAK_578 | 22  | 8.46  | Il15          | 634971  | 4480735 | 1.629272938 | up   |
| MACS_PEAK_578 | 22  | 8.46  | Il15          | 634971  | 2690768 | 1.812394142 | up   |
| MACS_PEAK_266 | 29  | 8.87  | Ptprm         | 255587  | 2600367 | 1.611815929 | up   |
| MACS_PEAK_202 | 18  | 9.67  | Stk3          | 233926  | 6330408 | 2.009322882 | up   |
| MACS_PEAK_346 | 23  | 6.8   | Slc7a11       | 686106  | 520470  | 1.724648714 | up   |
| MACS_PEAK_569 | 26  | 9.2   | Pdlim3        | 223673  | 2000482 | 1.562441349 | up   |
| MACS_PEAK_618 | 18  | 4.83  | Rasl12        | 7942    | 1820037 | 1.698372841 | up   |
| MACS_PEAK_589 | 20  | 6.65  | Cdh5          | 830811  | 1030273 | 1.843039036 | up   |
| MACS_PEAK_622 | 20  | 7.86  | Epm2aip1      | 39821   | 1510176 | 5.14840889  | down |
| MACS_PEAK_303 | 17  | 6.65  | Sorcs1        | 1806464 | 4060273 | 1.559650183 | up   |
| MACS_PEAK_350 | 27  | 4.88  | Mbnl1         | 251385  | 5090156 | 1.676026583 | down |
| MACS_PEAK_375 | 19  | 5.58  | Bach2         | 236734  | 3460142 | 3.964662313 | down |
| MACS_PEAK_403 | 18  | 5.44  | Ptprm         | 815980  | 5270161 | 2.411968231 | up   |
| MACS_PEAK_495 | 17  | 7.86  | 1810058I24Rik | 31248   | 1440431 | 3.318252325 | down |
| MACS_PEAK_341 | 34  | 4.88  | Dnajc5b       | 197654  | 2690301 | 1.910481453 | up   |
| MACS_PEAK_459 | 22  | 8.09  | Rimbp2        | 154734  | 6270019 | 1.59570837  | up   |
| MACS_PEAK_558 | 29  | 13.9  | Mki67         | 626695  | 4490110 | 1.912924767 | down |
| MACS_PEAK_558 | 29  | 13.9  | Mki67         | 626695  | 5220553 | 2.990350723 | down |
| MACS_PEAK_514 | 20  | 5.32  | Shq1          | 275223  | 1410014 | 1.644196033 | up   |
| MACS_PEAK_344 | 26  | 6.65  | Skil          | 45044   | 3800274 | 1.511991978 | down |
| MACS_PEAK_496 | 16  | 5.92  | Rarres2       | 17488   | 6060367 | 2.030186653 | up   |
| MACS_PEAK_561 | 40  | 5.32  | Tpcn2         | 77364   | 2190364 | 2.939031839 | up   |
| MACS_PEAK_381 | 21  | 7.25  | Al427809      | 170186  | 2320564 | 1.684773922 | up   |
| MACS_PEAK_314 | 36  | 8.6   | Ggta1         | 52859   | 4250066 | 1.651818871 | up   |
| MACS_PEAK_619 | 18  | 9.06  | Tcf12         | 339337  | 3830647 | 1.750166893 | down |
| MACS_PEAK_619 | 18  | 9.06  | Tcf12         | 339337  | 2030274 | 2.977221966 | down |
| MACS_PEAK_326 | 19  | 6.65  | Sirpa         | 65087   | 3180368 | 1.617762208 | up   |
| MACS_PEAK_443 | 32  | 5.7   | Uso1          | 54154   | 4290746 | 1.944169879 | up   |

Table S5 Sox6 (8 pages)

| CHIPSeq_MACS_Peak_id | CHIPSeq_MACS_PeakTags | CHIPSeq_MACS_PeakFoldEnrichment | GenesSymbol   |
|----------------------|-----------------------|---------------------------------|---------------|
| MACS_Peak_188        | 28                    | 7.97                            | Nfib          |
| MACS_Peak_146        | 18                    | 5.62                            | Rapgef4       |
| MACS_Peak_109        | 21                    | 6.09                            | Ripk4         |
| MACS_Peak_95         | 38                    | 8.44                            | Myo10         |
| MACS_Peak_96         | 41                    | 10.78                           | Myo10         |
| MACS_Peak_53         | 18                    | 6.09                            | Ccdc46        |
| MACS_Peak_57         | 27                    | 8.91                            | Rhob          |
| MACS_Peak_288        | 73                    | 17.92                           | Fbxl12        |
| MACS_Peak_40         | 99                    | 27.19                           | Odz2          |
| MACS_Peak_120        | 29                    | 6.94                            | Reep5         |
| MACS_Peak_162        | 46                    | 3.64                            | Rap2b         |
| MACS_Peak_252        | 37                    | 11.72                           | Dbx1          |
| MACS_Peak_272        | 40                    | 12.66                           | Pdlim3        |
| MACS_Peak_136        | 27                    | 8.91                            | Sorbs1        |
| MACS_Peak_282        | 36                    | 13.12                           | Zfhx3         |
| MACS_Peak_282        | 36                    | 13.12                           | Zfhx3         |
| MACS_Peak_4          | 35                    | 11.48                           | Fhl2          |
| MACS_Peak_241        | 159                   | 24.57                           | Aebp2         |
| MACS_Peak_241        | 159                   | 24.57                           | Pde3a         |
| MACS_Peak_291        | 30                    | 5.58                            | Tle3          |
| MACS_Peak_192        | 25                    | 5.62                            | Nfia          |
| MACS_Peak_193        | 19                    | 6.36                            | Nfia          |
| MACS_Peak_194        | 31                    | 7.03                            | Nfia          |
| MACS_Peak_36         | 34                    | 7.1                             | Krr1          |
| MACS_Peak_102        | 20                    | 5.16                            | Tbx1          |
| MACS_Peak_114        | 179                   | 30.85                           | Notch4        |
| MACS_Peak_2          | 40                    | 5.73                            | Cpa6          |
| MACS_Peak_188        | 28                    | 7.97                            | Nfib          |
| MACS_Peak_184        | 19                    | 6.56                            | Tmem38b       |
| MACS_Peak_55         | 30                    | 6.94                            | 2610035D17Rik |
| MACS_Peak_130        | 20                    | 6.09                            | Trpm3         |
| MACS_Peak_131        | 22                    | 5.16                            | Trpm3         |
| MACS_Peak_299        | 44                    | 12.5                            | Pin4          |
| MACS_Peak_250        | 23                    | 6.07                            | Tshz3         |
| MACS_Peak_57         | 27                    | 8.91                            | Hs1bp3        |
| MACS_Peak_78         | 29                    | 6.09                            | Edil3         |
| MACS_Peak_294        | 17                    | 5.16                            | Fbxo9         |
| MACS_Peak_41         | 20                    | 4.77                            | Adamts2       |
| MACS_Peak_41         | 20                    | 4.77                            | Adamts2       |
| MACS_Peak_188        | 28                    | 7.97                            | Nfib          |
| MACS_Peak_258        | 19                    | 5.16                            | Parva         |
| MACS_Peak_3          | 23                    | 7.03                            | Col9a1        |
| MACS_Peak_244        | 31                    | 8.44                            | Sox5          |
| MACS_Peak_245        | 37                    | 5.16                            | Sox5          |
| MACS_Peak_246        | 118                   | 35.62                           | Sox5          |
| MACS_Peak_247        | 43                    | 14.53                           | Sox5          |
| MACS_Peak_242        | 54                    | 14.45                           | Sox5          |

|               |     |       |               |
|---------------|-----|-------|---------------|
| MACS_PEAK_243 | 22  | 5.77  | Sox5          |
| MACS_PEAK_244 | 31  | 8.44  | Sox5          |
| MACS_PEAK_245 | 37  | 5.16  | Sox5          |
| MACS_PEAK_246 | 118 | 35.62 | Sox5          |
| MACS_PEAK_247 | 43  | 14.53 | Sox5          |
| MACS_PEAK_242 | 54  | 14.45 | Sox5          |
| MACS_PEAK_243 | 22  | 5.77  | Sox5          |
| MACS_PEAK_244 | 31  | 8.44  | Sox5          |
| MACS_PEAK_245 | 37  | 5.16  | Sox5          |
| MACS_PEAK_246 | 118 | 35.62 | Sox5          |
| MACS_PEAK_247 | 43  | 14.53 | Sox5          |
| MACS_PEAK_242 | 54  | 14.45 | Sox5          |
| MACS_PEAK_243 | 22  | 5.77  | Sox5          |
| MACS_PEAK_290 | 32  | 7.46  | Sorl1         |
| MACS_PEAK_299 | 44  | 12.5  | Rgag4         |
| MACS_PEAK_204 | 24  | 8.44  | Phox2b        |
| MACS_PEAK_155 | 44  | 13.89 | Tshz2         |
| MACS_PEAK_114 | 179 | 30.85 | Gpsm3         |
| MACS_PEAK_191 | 30  | 8.91  | Cyp2j9        |
| MACS_PEAK_244 | 31  | 8.44  | Sox5          |
| MACS_PEAK_245 | 37  | 5.16  | Sox5          |
| MACS_PEAK_246 | 118 | 35.62 | Sox5          |
| MACS_PEAK_247 | 43  | 14.53 | Sox5          |
| MACS_PEAK_242 | 54  | 14.45 | Sox5          |
| MACS_PEAK_243 | 22  | 5.77  | Sox5          |
| MACS_PEAK_188 | 28  | 7.97  | Nfib          |
| MACS_PEAK_152 | 26  | 7.73  | Slc24a3       |
| MACS_PEAK_147 | 23  | 7.03  | Mtx2          |
| MACS_PEAK_31  | 26  | 6.21  | Ank3          |
| MACS_PEAK_79  | 17  | 6.09  | F2rl1         |
| MACS_PEAK_115 | 24  | 6.56  | Rab31         |
| MACS_PEAK_225 | 53  | 18.54 | Chchd3        |
| MACS_PEAK_240 | 34  | 9.11  | Atf7ip        |
| MACS_PEAK_199 | 26  | 7.1   | Ajap1         |
| MACS_PEAK_193 | 19  | 6.36  | E130114P18Rik |
| MACS_PEAK_241 | 159 | 24.57 | Aebp2         |
| MACS_PEAK_259 | 34  | 7.46  | Insc          |
| MACS_PEAK_21  | 27  | 8.73  | Tgfb2         |
| MACS_PEAK_37  | 31  | 9.07  | Frs2          |
| MACS_PEAK_109 | 21  | 6.09  | Tmprss2       |
| MACS_PEAK_15  | 25  | 8.44  | Rgs16         |
| MACS_PEAK_127 | 27  | 8.44  | Tcf4          |
| MACS_PEAK_97  | 21  | 4.69  | Col22a1       |
| MACS_PEAK_117 | 34  | 5.21  | Ypel5         |
| MACS_PEAK_161 | 36  | 8.98  | Foxo1         |
| MACS_PEAK_237 | 39  | 6.91  | Ing4          |
| MACS_PEAK_259 | 34  | 7.46  | Sox6          |
| MACS_PEAK_260 | 21  | 7.97  | Sox6          |

|               |    |       |            |
|---------------|----|-------|------------|
| MACS_PEAK_261 | 25 | 7.97  | Sox6       |
| MACS_PEAK_31  | 26 | 6.21  | Ccdc6      |
| MACS_PEAK_9   | 20 | 5.62  | Mtap2      |
| MACS_PEAK_231 | 28 | 9.37  | Magi1      |
| MACS_PEAK_232 | 56 | 8.85  | Magi1      |
| MACS_PEAK_283 | 21 | 6.56  | Gm1943     |
| MACS_PEAK_93  | 44 | 12.89 | Lifr       |
| MACS_PEAK_93  | 44 | 12.89 | Lifr       |
| MACS_PEAK_123 | 21 | 6.74  | Csnk1g3    |
| MACS_PEAK_144 | 53 | 5.3   | St6galnac6 |
| MACS_PEAK_284 | 31 | 4.69  | Maf        |
| MACS_PEAK_23  | 38 | 11.25 | Cited2     |
| MACS_PEAK_23  | 38 | 11.25 | Cited2     |
| MACS_PEAK_59  | 26 | 9.37  | Sox11      |
| MACS_PEAK_178 | 20 | 7.03  | Lrrc7      |
| MACS_PEAK_221 | 47 | 6.69  | Fbxl18     |
| MACS_PEAK_106 | 52 | 9.21  | Grik1      |
| MACS_PEAK_174 | 45 | 8.62  | Col25a1    |
| MACS_PEAK_174 | 45 | 8.62  | Col25a1    |
| MACS_PEAK_116 | 23 | 7.03  | Ptprm      |
| MACS_PEAK_188 | 28 | 7.97  | Nfib       |
| MACS_PEAK_3   | 23 | 7.03  | Col9a1     |
| MACS_PEAK_104 | 34 | 8.44  | Phldb2     |
| MACS_PEAK_286 | 23 | 6.56  | Pard3      |
| MACS_PEAK_171 | 24 | 6.09  | Prmt6      |
| MACS_PEAK_237 | 39 | 6.91  | Ing4       |
| MACS_PEAK_264 | 23 | 7.03  | Mgmt       |
| MACS_PEAK_89  | 28 | 4.97  | Gm1587     |
| MACS_PEAK_223 | 27 | 7.03  | Stard13    |
| MACS_PEAK_77  | 30 | 7.97  | Mef2c      |
| MACS_PEAK_160 | 22 | 6.09  | Slc7a11    |
| MACS_PEAK_9   | 20 | 5.62  | Mtap2      |
| MACS_PEAK_276 | 59 | 12.69 | Ednra      |
| MACS_PEAK_200 | 58 | 13.71 | Arhgef16   |
| MACS_PEAK_58  | 24 | 8.44  | Laptm4a    |
| MACS_PEAK_240 | 34 | 9.11  | Atf7ip     |
| MACS_PEAK_9   | 20 | 5.62  | Mtap2      |
| MACS_PEAK_207 | 25 | 5.96  | Cnot6l     |
| MACS_PEAK_176 | 23 | 6.56  | Unc5c      |
| MACS_PEAK_49  | 29 | 7.81  | Rad51c     |
| MACS_PEAK_77  | 30 | 7.97  | Mef2c      |
| MACS_PEAK_171 | 24 | 6.09  | Ntng1      |
| MACS_PEAK_143 | 22 | 5.62  | Thns1      |
| MACS_PEAK_143 | 22 | 5.62  | Thns1      |
| MACS_PEAK_190 | 25 | 5.47  | BC057079   |
| MACS_PEAK_109 | 21 | 6.09  | Ripk4      |
| MACS_PEAK_186 | 20 | 5.16  | Snx30      |
| MACS_PEAK_170 | 41 | 10.87 | Sort1      |

|               |     |       |               |
|---------------|-----|-------|---------------|
| MACS_PEAK_106 | 52  | 9.21  | Bach1         |
| MACS_PEAK_292 | 21  | 6.51  | Nedd4         |
| MACS_PEAK_172 | 38  | 9.37  | Col11a1       |
| MACS_PEAK_172 | 38  | 9.37  | Col11a1       |
| MACS_PEAK_130 | 20  | 6.09  | Tmem2         |
| MACS_PEAK_220 | 23  | 6.56  | Auts2         |
| MACS_PEAK_241 | 159 | 24.57 | Aebp2         |
| MACS_PEAK_116 | 23  | 7.03  | Ptprm         |
| MACS_PEAK_54  | 26  | 7.03  | BC006965      |
| MACS_PEAK_160 | 22  | 6.09  | Slc7a11       |
| MACS_PEAK_272 | 40  | 12.66 | Pdlim3        |
| MACS_PEAK_289 | 22  | 6.56  | Ets1          |
| MACS_PEAK_210 | 32  | 8.97  | Mtf2          |
| MACS_PEAK_163 | 22  | 6.56  | Mme           |
| MACS_PEAK_168 | 19  | 6.39  | Igsf3         |
| MACS_PEAK_67  | 44  | 5.02  | Dnahc11       |
| MACS_PEAK_66  | 22  | 6.56  | Dnahc11       |
| MACS_PEAK_175 | 21  | 6.56  | Nfkb1         |
| MACS_PEAK_132 | 22  | 8.44  | Papss2        |
| MACS_PEAK_133 | 30  | 7.97  | Papss2        |
| MACS_PEAK_132 | 22  | 8.44  | Papss2        |
| MACS_PEAK_133 | 30  | 7.97  | Papss2        |
| MACS_PEAK_224 | 31  | 12.19 | 2610001J05Rik |
| MACS_PEAK_11  | 17  | 7.03  | Epha4         |
| MACS_PEAK_106 | 52  | 9.21  | Grik1         |
| MACS_PEAK_181 | 29  | 8.44  | Bach2         |
| MACS_PEAK_170 | 41  | 10.87 | Sort1         |
| MACS_PEAK_205 | 20  | 5.62  | Rasl11b       |
| MACS_PEAK_206 | 31  | 6.64  | Rasl11b       |
| MACS_PEAK_205 | 20  | 5.62  | Rasl11b       |
| MACS_PEAK_206 | 31  | 6.64  | Rasl11b       |
| MACS_PEAK_188 | 28  | 7.97  | Zdhhc21       |
| MACS_PEAK_86  | 20  | 5.62  | Tnfrsf19      |
| MACS_PEAK_264 | 23  | 7.03  | Mki67         |
| MACS_PEAK_264 | 23  | 7.03  | Mki67         |
| MACS_PEAK_14  | 18  | 6.56  | Ube2t         |
| MACS_PEAK_233 | 19  | 5.62  | Shq1          |
| MACS_PEAK_156 | 45  | 11.65 | Slmo2         |
| MACS_PEAK_277 | 30  | 7.81  | Gipc1         |
| MACS_PEAK_184 | 19  | 6.56  | Zfp462        |
| MACS_PEAK_266 | 42  | 7.03  | Tpcn2         |
| MACS_PEAK_145 | 37  | 6.31  | Ggta1         |
| MACS_PEAK_216 | 29  | 4.23  | Mvk           |
| MACS_PEAK_99  | 25  | 7.97  | Krt7          |
| MACS_PEAK_172 | 38  | 9.37  | Rnpc3         |

| AbsoluteDistanceFromPeakToGene | ProbeID | ExpressionFoldChangeAbsolute | ExpressionRegulationDirection |
|--------------------------------|---------|------------------------------|-------------------------------|
| 200638                         | 4060075 | 2.002110958                  | down                          |
| 56846                          | 2450601 | 1.735148907                  | up                            |
| 80229                          | 1570598 | 1.717285275                  | up                            |
| 20188                          | 1470035 | 1.700320125                  | up                            |
| 31284                          | 1470035 | 1.700320125                  | up                            |
| 75647                          | 2260301 | 1.526793838                  | up                            |
| 113454                         | 1710538 | 2.576362133                  | down                          |
| 465                            | 2690437 | 1.704402566                  | up                            |
| 734148                         | 7050408 | 2.188945532                  | down                          |
| 9844                           | 730541  | 1.620755076                  | up                            |
| 836767                         | 2710189 | 1.678804159                  | up                            |
| 109201                         | 1710487 | 1.643950105                  | down                          |
| 223656                         | 650452  | 2.682033539                  | up                            |
| 7872                           | 4250373 | 3.83799386                   | down                          |
| 894067                         | 3870068 | 2.569363832                  | down                          |
| 894067                         | 6580376 | 1.584697604                  | down                          |
| 194368                         | 2350019 | 1.584973693                  | up                            |
| 348081                         | 610020  | 1.723865151                  | up                            |
| 276890                         | 4070168 | 1.607645631                  | up                            |
| 246190                         | 2710338 | 1.613103151                  | down                          |
| 115765                         | 130544  | 1.942586541                  | up                            |
| 54856                          | 130544  | 1.942586541                  | up                            |
| 331218                         | 130544  | 1.942586541                  | up                            |
| 47067                          | 730594  | 1.633091927                  | up                            |
| 73346                          | 2900239 | 1.628616214                  | up                            |
| 22617                          | 4250059 | 2.045795679                  | up                            |
| 274009                         | 510601  | 1.919758916                  | up                            |
| 200638                         | 2350162 | 3.720114231                  | down                          |
| 206387                         | 4540626 | 1.543681145                  | up                            |
| 13206                          | 1090044 | 1.550805688                  | down                          |
| 110562                         | 2260600 | 1.723128915                  | up                            |
| 212703                         | 2260600 | 1.723128915                  | up                            |
| 181                            | 5360615 | 3.598824739                  | down                          |
| 682715                         | 380438  | 1.775392175                  | up                            |
| 73098                          | 520711  | 1.551209569                  | up                            |
| 644986                         | 70050   | 1.579653502                  | up                            |
| 31532                          | 2140411 | 1.588924289                  | up                            |
| 60853                          | 7570563 | 2.20483923                   | up                            |
| 60853                          | 6520273 | 2.847491264                  | up                            |
| 200638                         | 540474  | 1.540476203                  | down                          |
| 72679                          | 290037  | 2.095227003                  | up                            |
| 18627                          | 7040373 | 1.630497336                  | down                          |
| 170157                         | 4880553 | 4.62940979                   | down                          |
| 152616                         | 4880553 | 4.62940979                   | down                          |
| 578                            | 4880553 | 4.62940979                   | down                          |
| 55276                          | 4880553 | 4.62940979                   | down                          |
| 709817                         | 4880553 | 4.62940979                   | down                          |

|        |         |             |      |
|--------|---------|-------------|------|
| 678583 | 4880553 | 4.62940979  | down |
| 170157 | 5050082 | 6.362275124 | down |
| 152616 | 5050082 | 6.362275124 | down |
| 578    | 5050082 | 6.362275124 | down |
| 55276  | 5050082 | 6.362275124 | down |
| 709817 | 5050082 | 6.362275124 | down |
| 678583 | 5050082 | 6.362275124 | down |
| 170157 | 6020273 | 2.341292381 | down |
| 152616 | 6020273 | 2.341292381 | down |
| 578    | 6020273 | 2.341292381 | down |
| 55276  | 6020273 | 2.341292381 | down |
| 709817 | 6020273 | 2.341292381 | down |
| 678583 | 6020273 | 2.341292381 | down |
| 388178 | 6960577 | 1.710558295 | down |
| 47977  | 360608  | 1.550311446 | up   |
| 130741 | 6220736 | 1.636369348 | up   |
| 296502 | 6270008 | 1.758626103 | down |
| 2894   | 3850221 | 1.547520876 | up   |
| 38997  | 4260746 | 1.525645852 | up   |
| 170157 | 6200707 | 1.902192593 | down |
| 152616 | 6200707 | 1.902192593 | down |
| 578    | 6200707 | 1.902192593 | down |
| 55276  | 6200707 | 1.902192593 | down |
| 709817 | 6200707 | 1.902192593 | down |
| 678583 | 6200707 | 1.902192593 | down |
| 200638 | 5290202 | 2.964277744 | down |
| 50443  | 4280131 | 1.602561235 | up   |
| 62853  | 6400204 | 1.664726734 | up   |
| 169782 | 6020176 | 2.969679832 | down |
| 12614  | 1410348 | 1.919010401 | up   |
| 70221  | 290315  | 1.548935175 | up   |
| 263    | 7550743 | 1.594190598 | up   |
| 52744  | 5690451 | 1.804197907 | down |
| 214466 | 2650731 | 1.863787413 | up   |
| 52208  | 4280184 | 3.115866661 | down |
| 348081 | 6350767 | 1.849905491 | up   |
| 625574 | 3520397 | 6.45871973  | up   |
| 64819  | 770754  | 4.134972572 | down |
| 14406  | 7560195 | 1.629254341 | up   |
| 72331  | 4070279 | 2.118969917 | up   |
| 80426  | 3890528 | 1.761289358 | up   |
| 367856 | 7550360 | 1.630245209 | down |
| 29482  | 5090348 | 1.713129163 | up   |
| 30324  | 6760008 | 1.505259752 | down |
| 71747  | 6580682 | 2.203903913 | up   |
| 41     | 6550408 | 1.596772075 | up   |
| 623746 | 4070386 | 2.446631193 | down |
| 414474 | 4070386 | 2.446631193 | down |

|        |         |             |      |
|--------|---------|-------------|------|
| 379334 | 4070386 | 2.446631193 | down |
| 1807   | 6550022 | 3.392610073 | down |
| 213551 | 3180593 | 2.897240162 | down |
| 592    | 2760328 | 1.938788414 | up   |
| 71     | 2760328 | 1.938788414 | up   |
| 154914 | 6760754 | 1.800988078 | down |
| 194812 | 5360220 | 1.614066362 | up   |
| 194812 | 670634  | 1.600601077 | up   |
| 512286 | 4880600 | 1.628932357 | down |
| 14410  | 6180452 | 1.534910202 | up   |
| 1181   | 4250450 | 1.702198863 | up   |
| 648262 | 6020379 | 1.539243817 | down |
| 648262 | 5860538 | 1.61139214  | down |
| 210302 | 990681  | 2.488309383 | down |
| 209117 | 7040129 | 1.692220926 | up   |
| 77487  | 7210066 | 1.584769487 | down |
| 453083 | 1190474 | 1.662040234 | up   |
| 19767  | 6020286 | 1.512342572 | up   |
| 19767  | 4760746 | 1.686721325 | up   |
| 694936 | 1580484 | 1.672431231 | up   |
| 200638 | 4180288 | 2.907538176 | down |
| 18627  | 3990167 | 11.82479382 | down |
| 92335  | 4280576 | 1.582591534 | up   |
| 201912 | 3400343 | 1.587090254 | up   |
| 114668 | 2650564 | 1.552326798 | up   |
| 41     | 4210168 | 1.761608839 | up   |
| 551466 | 3890072 | 1.876641154 | up   |
| 179396 | 1050338 | 1.520992517 | up   |
| 204269 | 4730079 | 1.853927612 | up   |
| 42186  | 5820369 | 1.849823236 | down |
| 193593 | 5080369 | 1.922748923 | up   |
| 213551 | 6100195 | 2.891719818 | down |
| 12939  | 4040189 | 2.376912355 | up   |
| 13561  | 4850719 | 1.68380928  | up   |
| 319    | 5560411 | 2.131327391 | up   |
| 52744  | 4570709 | 3.180575371 | down |
| 213551 | 6220632 | 1.541220665 | down |
| 48114  | 2900725 | 1.637559295 | down |
| 155903 | 2510291 | 1.731092215 | down |
| 39104  | 3360253 | 1.950005174 | down |
| 42186  | 2570427 | 1.64749217  | down |
| 7142   | 1990519 | 2.279101133 | up   |
| 320003 | 5490575 | 1.586515665 | up   |
| 320003 | 5360242 | 1.570795536 | up   |
| 32333  | 6840592 | 1.598837972 | up   |
| 80229  | 3850086 | 2.464329481 | up   |
| 21624  | 5270671 | 1.611051083 | down |
| 1504   | 5360706 | 1.571092129 | up   |



|        |         |             |      |
|--------|---------|-------------|------|
| 138221 | 1990487 | 3.790873051 | down |
| 29752  | 2760386 | 1.531288147 | up   |
| 331265 | 1170192 | 2.961684942 | down |
| 331265 | 6520184 | 2.004609585 | down |
| 559304 | 2570142 | 3.613222599 | down |
| 792675 | 2340097 | 3.004128218 | down |
| 348081 | 4200086 | 1.62104094  | up   |
| 694936 | 2600367 | 1.611815929 | up   |
| 336817 | 780594  | 1.501077652 | up   |
| 193593 | 520470  | 1.724648714 | up   |
| 223656 | 2000482 | 1.562441349 | up   |
| 130243 | 6020398 | 3.387423277 | up   |
| 138    | 630615  | 2.279771328 | down |
| 237870 | 7100259 | 2.044068336 | up   |
| 33860  | 2100201 | 2.070895195 | down |
| 154795 | 4220139 | 1.538279057 | up   |
| 308608 | 4220139 | 1.538279057 | up   |
| 26533  | 4180669 | 1.526234984 | up   |
| 6343   | 2710739 | 1.707736969 | down |
| 10832  | 2710739 | 1.707736969 | down |
| 6343   | 4260148 | 2.034782171 | down |
| 10832  | 4260148 | 2.034782171 | down |
| 760765 | 3890240 | 1.686969757 | up   |
| 590050 | 770148  | 1.533346653 | up   |
| 453083 | 3890370 | 1.907122612 | up   |
| 13796  | 3460142 | 3.964662313 | down |
| 1504   | 6370600 | 1.556075573 | up   |
| 58943  | 150372  | 1.523000121 | up   |
| 71025  | 150372  | 1.523000121 | up   |
| 58943  | 290341  | 2.123251438 | up   |
| 71025  | 290341  | 2.123251438 | up   |
| 554991 | 2650064 | 2.122733355 | down |
| 253421 | 2060546 | 1.982052088 | up   |
| 626766 | 4490110 | 1.912924767 | down |
| 626766 | 5220553 | 2.990350723 | down |
| 36258  | 3190403 | 2.584891558 | down |
| 162615 | 1410014 | 1.644196033 | up   |
| 16676  | 6660497 | 1.659236312 | down |
| 154    | 1090468 | 1.569516063 | up   |
| 915513 | 1570356 | 2.887309313 | down |
| 77474  | 2190364 | 2.939031839 | up   |
| 52800  | 4250066 | 1.651818871 | up   |
| 106156 | 1230561 | 1.720483065 | up   |
| 15748  | 7330477 | 1.59222734  | up   |
| 69126  | 2750315 | 1.966447353 | down |

Table S5 Sox9 (17 pages)

| ChIPSeq_MACS_Peak_id | ChIPSeq_MACS_PeakFol | ChIPSeq_MACS_PeakFolEnrichment | GeneSymbol   | AbsoluteDistanceFromPeakToGene | ProbeID   | ExpressionFoldChangeAbsolute | ExpressionRegulationDirection |
|----------------------|----------------------|--------------------------------|--------------|--------------------------------|-----------|------------------------------|-------------------------------|
| MACS_Peak_12         | 32                   | 14.54                          | 111005819Rik | 28547                          | 6770020   | 1.525534511                  | down                          |
| MACS_Peak_13         | 54                   | 18.78                          | Col9a1       | 18482                          | 7100446   | 19.59921646                  | down                          |
| MACS_Peak_14         | 32                   | 11.51                          | Col9a1       | 44317                          | 7100446   | 19.59921646                  | down                          |
| MACS_Peak_15         | 28                   | 14.54                          | Col9a1       | 53031                          | 7100446   | 19.59921646                  | down                          |
| MACS_Peak_16         | 18                   | 7.27                           | Dst          | 7379                           | 430026    | 1.81259644                   | up                            |
| MACS_Peak_18         | 25                   | 7.27                           | Map4k4       | 47007                          | 100610154 | 1.717389713                  | up                            |
| MACS_Peak_43         | 73                   | 6.65                           | Gli3         | 21206                          | 101588047 | 3.115655575                  | down                          |
| MACS_Peak_66         | 28                   | 7.88                           | Fzd5         | 54532                          | 620296    | 1.885383677                  | down                          |
| MACS_Peak_103        | 43                   | 19.99                          | Ndufa10      | 94118                          | 105390369 | 1.53215611                   | up                            |
| MACS_Peak_135        | 28                   | 10.91                          | Prefp        | 135                            | 5900390   | 11.8449877                   | down                          |
| MACS_Peak_150        | 36                   | 13.85                          | Glt25d2      | 7909                           | 540465    | 1.897881746                  | down                          |
| MACS_Peak_151        | 28                   | 12.12                          | Glt25d2      | 55567                          | 540465    | 1.897881746                  | down                          |
| MACS_Peak_155        | 28                   | 10.91                          | Gli3         | 62421                          | 6040253   | 2.251183271                  | up                            |
| MACS_Peak_156        | 42                   | 16.96                          | Gli3         | 78531                          | 6040253   | 2.251183271                  | up                            |
| MACS_Peak_185        | 20                   | 6.06                           | Sdcca8       | 578                            | 1780687   | 1.983003497                  | up                            |
| MACS_Peak_206        | 58                   | 12.12                          | Tgfb2        | 64649                          | 4920292   | 2.04001236                   | down                          |
| MACS_Peak_213        | 39                   | 16.72                          | Sertad4      | 28819                          | 130593    | 1.795625091                  | down                          |
| MACS_Peak_234        | 30                   | 14.54                          | Igk1         | 42661                          | 1400131   | 1.599029541                  | down                          |
| MACS_Peak_236        | 56                   | 29.69                          | Moxd1        | 157576                         | 2450301   | 3.239943504                  | down                          |
| MACS_Peak_237        | 33                   | 13.93                          | Ctcf         | 136662                         | 4540577   | 4.026652813                  | down                          |
| MACS_Peak_253        | 33                   | 16.96                          | Micr1        | 834                            | 6550048   | 2.097376823                  | up                            |
| MACS_Peak_253        | 33                   | 16.96                          | Micr1        | 834                            | 608013    | 1.59259576                   | up                            |
| MACS_Peak_258        | 29                   | 11.51                          | Snai3        | 23027                          | 2940484   | 1.603038861                  | down                          |
| MACS_Peak_261        | 42                   | 6.66                           | Snai3        | 120438                         | 2320136   | 1.753223777                  | down                          |
| MACS_Peak_272        | 33                   | 16.36                          | Hace1        | 314904                         | 4210348   | 1.551439762                  | down                          |
| MACS_Peak_273        | 184                  | 92.09                          | Hace1        | 316291                         | 4210348   | 1.551439762                  | down                          |
| MACS_Peak_274        | 34                   | 11.62                          | Hace1        | 1524947                        | 4210348   | 1.551439762                  | down                          |
| MACS_Peak_276        | 19                   | 6.66                           | Ancx3        | 392600                         | 6550132   | 1.935636044                  | down                          |
| MACS_Peak_286        | 47                   | 14.22                          | Chst3        | 23996                          | 2370131   | 1.71955502                   | down                          |
| MACS_Peak_287        | 29                   | 9.05                           | Chst3        | 19565                          | 2370131   | 1.71955502                   | down                          |
| MACS_Peak_288        | 58                   | 19.39                          | Chst3        | 16257                          | 2370131   | 1.71955502                   | down                          |
| MACS_Peak_308        | 19                   | 7.27                           | Sic3pa3      | 3564                           | 3990397   | 1.562371969                  | up                            |
| MACS_Peak_310        | 25                   | 10.91                          | Chst11       | 103198                         | 6760546   | 1.705717921                  | down                          |
| MACS_Peak_311        | 98                   | 42.79                          | Chst11       | 145338                         | 6760546   | 1.705717921                  | down                          |
| MACS_Peak_312        | 22                   | 10.3                           | Chst11       | 149578                         | 6760546   | 1.705717921                  | down                          |
| MACS_Peak_313        | 27                   | 8.41                           | Chst11       | 154951                         | 6760546   | 1.705717921                  | down                          |
| MACS_Peak_314        | 71                   | 28.47                          | Chst11       | 160576                         | 6760546   | 1.705717921                  | down                          |
| MACS_Peak_321        | 17                   | 7.88                           | Mt5a3        | 29175                          | 1091195   | 2.013053179                  | down                          |
| MACS_Peak_330        | 28                   | 5.08                           | Nucl4        | 165858                         | 6760689   | 2.079841614                  | down                          |
| MACS_Peak_332        | 72                   | 23.63                          | Btg1         | 218555                         | 6200133   | 16.80504227                  | down                          |
| MACS_Peak_333        | 18                   | 7.88                           | Btg1         | 209436                         | 6200133   | 16.80504227                  | down                          |
| MACS_Peak_334        | 19                   | 6.1                            | Dcn          | 165735                         | 5900711   | 6.7773633                    | down                          |
| MACS_Peak_334        | 19                   | 6.1                            | Dcn          | 165735                         | 6550092   | 2.875388622                  | down                          |
| MACS_Peak_346        | 204                  | 100.57                         | Krr1         | 47067                          | 6130504   | 3.11702013                   | down                          |
| MACS_Peak_352        | 34                   | 13.3                           | Cnot2        | 47080                          | 5550113   | 4.808637342                  | down                          |
| MACS_Peak_364        | 19                   | 7.88                           | Hmga2        | 109181                         | 5130279   | 2.021983624                  | up                            |
| MACS_Peak_378        | 29                   | 10.16                          | Lrp1         | 21445                          | 6270386   | 1.784999251                  | up                            |
| MACS_Peak_379        | 24                   | 9.74                           | Lrp1         | 12050                          | 6270386   | 1.784999251                  | up                            |
| MACS_Peak_386        | 21                   | 8.48                           | Tns3         | 239877                         | 6380242   | 1.662731886                  | down                          |
| MACS_Peak_387        | 30                   | 5.54                           | Tns3         | 31647                          | 6380242   | 1.662731886                  | down                          |
| MACS_Peak_388        | 44                   | 15.08                          | Tns3         | 97272                          | 6380242   | 1.662731886                  | down                          |
| MACS_Peak_400        | 22                   | 7.27                           | Tmem17       | 30490                          | 5900079   | 1.602697849                  | down                          |
| MACS_Peak_401        | 20                   | 6.66                           | Tmem17       | 75056                          | 5900079   | 1.602697849                  | down                          |
| MACS_Peak_402        | 25                   | 9.34                           | Bcl11a       | 227426                         | 6860369   | 1.595377803                  | up                            |
| MACS_Peak_414        | 21                   | 10.91                          | Odz2         | 239963                         | 430538    | 1.597476363                  | up                            |
| MACS_Peak_415        | 27                   | 8.48                           | Odz2         | 854680                         | 430538    | 1.597476363                  | up                            |
| MACS_Peak_420        | 55                   | 18.78                          | Clint1       | 595760                         | 7050242   | 3.635176659                  | down                          |
| MACS_Peak_421        | 28                   | 6.97                           | Clint1       | 462406                         | 7050242   | 3.635176659                  | down                          |
| MACS_Peak_422        | 46                   | 13.93                          | Clint1       | 213612                         | 7050242   | 3.635176659                  | down                          |
| MACS_Peak_423        | 21                   | 6.06                           | Clint1       | 181234                         | 7050242   | 3.635176659                  | down                          |
| MACS_Peak_424        | 100                  | 49.07                          | Clint1       | 29981                          | 7050242   | 3.635176659                  | down                          |
| MACS_Peak_425        | 35                   | 9.09                           | Gfp2         | 29344                          | 2370129   | 2.037397351                  | down                          |
| MACS_Peak_426        | 17                   | 5.45                           | Gfp2         | 881                            | 2370129   | 2.037397351                  | down                          |
| MACS_Peak_427        | 19                   | 6.1                            | Mapk9        | 1521                           | 4070397   | 4.267343521                  | down                          |
| MACS_Peak_428        | 22                   | 5.59                           | Col2a3       | 116729                         | 106620088 | 1.454796553                  | up                            |
| MACS_Peak_447        | 40                   | 16.36                          | Pmp22        | 332444                         | 6550072   | 12.38482176                  | down                          |
| MACS_Peak_447        | 40                   | 16.36                          | Pmp22        | 332444                         | 4010239   | 2.244052089                  | down                          |
| MACS_Peak_490        | 27                   | 10.3                           | Ctcf         | 141                            | 3130168   | 3.60626836                   | down                          |
| MACS_Peak_494        | 41                   | 7.86                           | Nag          | 56285                          | 2320609   | 4.01401329                   | down                          |
| MACS_Peak_507        | 17                   | 7.88                           | Star3        | 4784                           | 5720341   | 1.97995615                   | up                            |
| MACS_Peak_509        | 130                  | 50.63                          | Tns4         | 23996                          | 5890253   | 1.765277054                  | up                            |
| MACS_Peak_525        | 42                   | 17.57                          | Kcnj2        | 43067                          | 630019    | 2.289093971                  | down                          |
| MACS_Peak_526        | 20                   | 10.91                          | Kcnj2        | 257162                         | 630019    | 2.289093971                  | down                          |
| MACS_Peak_527        | 24                   | 12.12                          | Kcnj2        | 620315                         | 630019    | 2.289093971                  | down                          |
| MACS_Peak_528        | 28                   | 5.54                           | Kcnj2        | 73806                          | 630019    | 2.289093971                  | down                          |
| MACS_Peak_529        | 27                   | 11.64                          | Kcnj2        | 740766                         | 630019    | 2.289093971                  | down                          |
| MACS_Peak_530        | 22                   | 7.88                           | Kcnj2        | 762403                         | 630019    | 2.289093971                  | down                          |
| MACS_Peak_548        | 40                   | 17.18                          | Sec14l1      | 8053                           | 3610537   | 1.908110738                  | up                            |
| MACS_Peak_550        | 27                   | 4.57                           | Sec14l1      | 6327                           | 3610537   | 1.908110738                  | up                            |
| MACS_Peak_560        | 25                   | 9.69                           | Balhccl      | 2327                           | 5900305   | 1.527143321                  | down                          |
| MACS_Peak_561        | 23                   | 8.48                           | Balhccl      | 10763                          | 5900305   | 1.527143321                  | down                          |
| MACS_Peak_589        | 26                   | 8.48                           | Sox11        | 154973                         | 106400717 | 3.148519754                  | up                            |
| MACS_Peak_589        | 26                   | 8.48                           | Sox11        | 154973                         | 104010731 | 1.644564867                  | up                            |
| MACS_Peak_590        | 26                   | 7.4                            | Sox11        | 31705                          | 106400717 | 3.148519754                  | up                            |
| MACS_Peak_590        | 26                   | 7.4                            | Sox11        | 31705                          | 104010731 | 1.644564867                  | up                            |
| MACS_Peak_591        | 38                   | 16.96                          | Sox11        | 233088                         | 106400717 | 3.148519754                  | up                            |
| MACS_Peak_591        | 38                   | 16.96                          | Sox11        | 233088                         | 104010731 | 1.644564867                  | up                            |
| MACS_Peak_593        | 31                   | 16.36                          | Tssc1        | 53576                          | 6590112   | 1.823648665                  | down                          |
| MACS_Peak_593        | 31                   | 16.36                          | Tssc1        | 53576                          | 2940504   | 2.46271801                   | down                          |
| MACS_Peak_593        | 31                   | 16.36                          | Tssc1        | 53576                          | 130324    | 4.981088023                  | down                          |
| MACS_Peak_611        | 39                   | 17.57                          | Scin         | 21076                          | 5420180   | 11.84676552                  | down                          |
| MACS_Peak_633        | 24                   | 7.27                           | Dact1        | 54999                          | 1500050   | 2.195098639                  | down                          |
| MACS_Peak_633        | 24                   | 7.27                           | Dact1        | 54999                          | 100630088 | 2.167698622                  | down                          |
| MACS_Peak_634        | 18                   | 6.06                           | Dact1        | 29891                          | 1500050   | 2.195098639                  | down                          |
| MACS_Peak_634        | 18                   | 6.06                           | Dact1        | 29891                          | 100630088 | 2.167698622                  | down                          |
| MACS_Peak_635        | 16                   | 7.88                           | Dact1        | 22980                          | 1500050   | 2.195098639                  | down                          |
| MACS_Peak_635        | 16                   | 7.88                           | Dact1        | 22980                          | 100630088 | 2.167698622                  | down                          |
| MACS_Peak_636        | 22                   | 5.94                           | Dact1        | 88891                          | 1500050   | 2.195098639                  | down                          |
| MACS_Peak_636        | 22                   | 5.94                           | Dact1        | 88891                          | 100630088 | 2.167698622                  | down                          |
| MACS_Peak_637        | 92                   | 27.26                          | Dact1        | 260228                         | 1500050   | 2.195098639                  | down                          |
| MACS_Peak_637        | 92                   | 27.26                          | Dact1        | 260228                         | 100630088 | 2.167698622                  | down                          |
| MACS_Peak_649        | 25                   | 6.66                           | Gphn         | 137049                         | 3840121   | 1.870468378                  | up                            |
| MACS_Peak_650        | 289                  | 8.65                           | Gphn         | 124349                         | 3840121   | 1.870468378                  | up                            |
| MACS_Peak_653        | 17                   | 7.27                           | Zfp361l      | 403664                         | 2510138   | 2.099901676                  | down                          |
| MACS_Peak_654        | 30                   | 6.97                           | Zfp361l      | 393179                         | 2510138   | 2.099901676                  | down                          |
| MACS_Peak_655        | 25                   | 10.58                          | Zfp361l      | 380065                         | 2510138   | 2.099901676                  | down                          |
| MACS_Peak_656        | 21                   | 9.94                           | Zfp361l      | 268592                         | 2510138   | 2.099901676                  | down                          |
| MACS_Peak_657        | 36                   | 7.23                           | Zfp361l      | 176708                         | 2510138   | 2.099901676                  | down                          |
| MACS_Peak_658        | 25                   | 15.8                           | Zfp361l      | 147353                         | 2510138   | 2.099901676                  | down                          |
| MACS_Peak_659        | 20                   | 7.27                           | Zfp361l      | 143615                         | 2510138   | 2.099901676                  | down                          |
| MACS_Peak_660        | 49                   | 21.2                           | Zfp361l      | 123307                         | 2510138   | 2.099901676                  | down                          |
| MACS_Peak_668        | 20                   | 7.27                           | Ylm1         | 77                             | 3190148   | 1.854726048                  | up                            |
| MACS_Peak_682        | 104                  | 47.26                          | Ttc8         | 121168                         | 2760791   | 2.469506468                  | down                          |
| MACS_Peak_682        | 104                  | 47.26                          | Ttc8         | 121168                         | 2370528   | 2.161311115                  | down                          |
| MACS_Peak_715        | 19                   | 8.48                           | Zmynd11      | 46828                          | 5360040   | 2.895047188                  | down                          |
| MACS_Peak_716        | 333                  | 8.38                           | Zmynd11      | 69027                          | 5360040   | 2.895047188                  | down                          |
| MACS_Peak_749        | 30                   | 12.12                          | Foxf2        | 85166                          | 1240091   | 2.093223333                  | up                            |
| MACS_Peak_767        | 37                   | 12.72                          | Wrip1        | 4567                           | 5890725   | 4.550052166                  | down                          |
| MACS_Peak_811        | 49                   | 22.11                          | Tgfb1        | 27320                          | 2060446   | 2.340261459                  | down                          |
| MACS_Peak_812        | 21                   | 5.59                           | Tgfb1        | 2619                           | 2060446   | 2.340261459                  | down                          |
| MACS_Peak_817        | 106                  | 49.07                          | Fbp2         | 7537                           | 1580193   | 2.343615055                  | down                          |

|                |     |        |               |        |           |             |      |
|----------------|-----|--------|---------------|--------|-----------|-------------|------|
| MACS_PEAK_828  | 38  | 9.65   | 0610007P08Rik | 123110 | 105720600 | 1.747234583 | down |
| MACS_PEAK_828  | 38  | 9.65   | 0610007P08Rik | 123110 | 106840121 | 1.564627409 | down |
| MACS_PEAK_834  | 19  | 6.06   | Zfp825        | 28807  | 100620544 | 1.752790809 | down |
| MACS_PEAK_836  | 31  | 10.3   | Rhobtb3       | 335    | 4010687   | 1.504313469 | down |
| MACS_PEAK_850  | 22  | 10.91  | Edi13         | 154815 | 101940605 | 1.737264156 | down |
| MACS_PEAK_851  | 23  | 9.69   | Hap1n1        | 204198 | 580398    | 6.735909462 | down |
| MACS_PEAK_852  | 20  | 7.88   | Hap1n1        | 145555 | 580398    | 6.735909462 | down |
| MACS_PEAK_853  | 27  | 9.69   | Hap1n1        | 19234  | 580398    | 6.735909462 | down |
| MACS_PEAK_854  | 28  | 12.72  | Vcan          | 73153  | 5910053   | 5.157835484 | down |
| MACS_PEAK_855  | 56  | 15.42  | Vcan          | 36873  | 5910053   | 5.157835484 | down |
| MACS_PEAK_867  | 21  | 9.09   | Jmy           | 11089  | 3360242   | 1.592119217 | down |
| MACS_PEAK_881  | 20  | 6.06   | Mccc2         | 13597  | 6110168   | 2.450114727 | down |
| MACS_PEAK_883  | 59  | 20.03  | Slc30a5       | 155924 | 2970403   | 3.024980068 | down |
| MACS_PEAK_883  | 59  | 20.03  | Slc30a5       | 155924 | 2630288   | 2.769304037 | down |
| MACS_PEAK_884  | 29  | 13.93  | Slc30a5       | 330667 | 2970403   | 3.024980068 | down |
| MACS_PEAK_884  | 29  | 13.93  | Slc30a5       | 330667 | 2630288   | 2.769304037 | down |
| MACS_PEAK_885  | 21  | 9.69   | Slc30a5       | 382755 | 2970403   | 3.024980068 | down |
| MACS_PEAK_885  | 21  | 9.69   | Slc30a5       | 382755 | 2630288   | 2.769304037 | down |
| MACS_PEAK_886  | 30  | 7.88   | Pik3r1        | 264446 | 4730671   | 2.600860834 | down |
| MACS_PEAK_887  | 23  | 10.3   | Pik3r1        | 197724 | 4730671   | 2.600860834 | down |
| MACS_PEAK_888  | 22  | 12.72  | Pik3r1        | 364085 | 4730671   | 2.600860834 | down |
| MACS_PEAK_913  | 40  | 4.79   | Flnb          | 8412   | 103870397 | 2.532634735 | down |
| MACS_PEAK_914  | 36  | 10.91  | Flnb          | 71572  | 103870397 | 2.532634735 | down |
| MACS_PEAK_915  | 93  | 47.26  | Flnb          | 78968  | 103870397 | 2.532634735 | down |
| MACS_PEAK_922  | 26  | 7.27   | Rarb          | 22707  | 430139    | 2.411809683 | down |
| MACS_PEAK_922  | 26  | 7.27   | Rarb          | 22707  | 1410138   | 2.624078751 | down |
| MACS_PEAK_923  | 28  | 12.12  | Rarb          | 247517 | 430139    | 2.411809683 | down |
| MACS_PEAK_923  | 28  | 12.12  | Rarb          | 247517 | 1410138   | 2.624078751 | down |
| MACS_PEAK_924  | 19  | 9.09   | Rarb          | 306265 | 430139    | 2.411809683 | down |
| MACS_PEAK_924  | 19  | 9.09   | Rarb          | 306265 | 1410138   | 2.624078751 | down |
| MACS_PEAK_925  | 38  | 13.33  | Ube2e1        | 176349 | 1090440   | 3.91310215  | down |
| MACS_PEAK_928  | 33  | 15.15  | Myst4         | 37192  | 1400563   | 1.949404359 | up   |
| MACS_PEAK_928  | 33  | 15.15  | Myst4         | 37192  | 2570687   | 1.982156515 | up   |
| MACS_PEAK_929  | 44  | 15.24  | Myst4         | 23670  | 1400563   | 1.949404359 | up   |
| MACS_PEAK_929  | 44  | 15.24  | Myst4         | 23670  | 2570687   | 1.982156515 | up   |
| MACS_PEAK_934  | 46  | 9.75   | Rps24         | 351827 | 102690538 | 1.870081425 | down |
| MACS_PEAK_935  | 29  | 8.31   | Rps24         | 410376 | 102690538 | 1.870081425 | down |
| MACS_PEAK_936  | 65  | 18.72  | Rps24         | 426371 | 102690538 | 1.870081425 | down |
| MACS_PEAK_952  | 17  | 7.62   | Bmpr1a        | 20255  | 2190193   | 4.158643246 | down |
| MACS_PEAK_970  | 20  | 7.97   | Cmtm5         | 386    | 6130390   | 4.380111694 | down |
| MACS_PEAK_974  | 20  | 8.48   | Gjbe          | 25048  | 5390441   | 1.630724072 | down |
| MACS_PEAK_981  | 32  | 6.97   | Dleu7         | 258087 | 2320402   | 1.752730727 | down |
| MACS_PEAK_982  | 46  | 19.39  | Dleu7         | 99972  | 2320402   | 1.752730727 | down |
| MACS_PEAK_987  | 33  | 13.93  | Stmn4         | 34113  | 2900091   | 1.638828397 | down |
| MACS_PEAK_988  | 33  | 16.36  | Ppp2r2a       | 63753  | 2900014   | 6.375761509 | down |
| MACS_PEAK_1002 | 21  | 7.27   | Tsc22d1       | 888    | 6040181   | 16.97862816 | down |
| MACS_PEAK_1002 | 21  | 7.27   | Tsc22d1       | 888    | 1340739   | 2.117260933 | down |
| MACS_PEAK_1013 | 48  | 15.75  | Lect1         | 1606   | 2640528   | 1.574525833 | down |
| MACS_PEAK_1014 | 27  | 8.48   | Lect1         | 16012  | 2640528   | 1.574525833 | down |
| MACS_PEAK_1037 | 41  | 19.99  | Dct           | 557565 | 1090347   | 1.577306986 | down |
| MACS_PEAK_1037 | 41  | 19.99  | Dct           | 557565 | 3840494   | 1.660903931 | down |
| MACS_PEAK_1038 | 63  | 30.9   | Dct           | 28368  | 1090347   | 1.577306986 | down |
| MACS_PEAK_1038 | 63  | 30.9   | Dct           | 28368  | 3840494   | 1.660903931 | down |
| MACS_PEAK_1041 | 77  | 40.59  | Mbnl2         | 116497 | 3450707   | 1.756134391 | down |
| MACS_PEAK_1042 | 45  | 21.9   | Mbnl2         | 1075   | 3450707   | 1.756134391 | down |
| MACS_PEAK_1043 | 52  | 13.33  | Mbnl2         | 18465  | 3450707   | 1.756134391 | down |
| MACS_PEAK_1083 | 28  | 10.91  | Laptm4b       | 25342  | 4150398   | 2.49363327  | up   |
| MACS_PEAK_1084 | 21  | 9.69   | Pabpc1        | 12059  | 6020632   | 1.694299459 | down |
| MACS_PEAK_1084 | 21  | 9.69   | Pabpc1        | 12059  | 2650180   | 2.18592906  | down |
| MACS_PEAK_1084 | 21  | 9.69   | Pabpc1        | 12059  | 2690253   | 3.044068575 | down |
| MACS_PEAK_1102 | 48  | 22.42  | Col14a1       | 62479  | 1570398   | 2.242420435 | down |
| MACS_PEAK_1103 | 25  | 10.06  | Mrpl13        | 99896  | 2850551   | 1.606062293 | up   |
| MACS_PEAK_1104 | 23  | 7.76   | Mrpl13        | 77519  | 2850551   | 1.606062293 | up   |
| MACS_PEAK_1124 | 30  | 11.97  | St3gal1       | 86092  | 5420301   | 1.560395718 | down |
| MACS_PEAK_1141 | 26  | 13.33  | Tnrc6b        | 18     | 101190041 | 1.602386117 | up   |
| MACS_PEAK_1150 | 18  | 8.48   | Klf21a        | 21326  | 101340647 | 2.176335573 | down |
| MACS_PEAK_1158 | 41  | 14.54  | Col2a1        | 22032  | 3940550   | 8.106253624 | down |
| MACS_PEAK_1168 | 41  | 14.54  | Col2a1        | 22032  | 460446    | 1.865817666 | down |
| MACS_PEAK_1168 | 41  | 14.54  | Col2a1        | 22032  | 104610193 | 4.782061577 | down |
| MACS_PEAK_1169 | 25  | 8.31   | Col2a1        | 22908  | 3940500   | 8.106253624 | down |
| MACS_PEAK_1169 | 25  | 8.31   | Col2a1        | 22908  | 460446    | 1.865817666 | down |
| MACS_PEAK_1169 | 25  | 8.31   | Col2a1        | 22908  | 104610193 | 4.782061577 | down |
| MACS_PEAK_1170 | 18  | 7.27   | Col2a1        | 26360  | 3940500   | 8.106253624 | down |
| MACS_PEAK_1170 | 18  | 7.27   | Col2a1        | 26360  | 460446    | 1.865817666 | down |
| MACS_PEAK_1170 | 18  | 7.27   | Col2a1        | 26360  | 104610193 | 4.782061577 | down |
| MACS_PEAK_1175 | 22  | 10.3   | Acvr1b        | 8728   | 105670494 | 2.186805487 | down |
| MACS_PEAK_1179 | 84  | 40.59  | Rarg          | 3309   | 6760136   | 1.786343336 | down |
| MACS_PEAK_1180 | 28  | 7.88   | Rarg          | 1785   | 6760136   | 1.786343336 | down |
| MACS_PEAK_1184 | 31  | 13.93  | Calcoco1      | 45     | 2570452   | 2.164650917 | up   |
| MACS_PEAK_1188 | 47  | 19.99  | Nfe2          | 4849   | 3710373   | 1.718353748 | down |
| MACS_PEAK_1193 | 22  | 11.51  | Vasn          | 2062   | 1770722   | 1.751005173 | down |
| MACS_PEAK_1200 | 28  | 6.65   | Tnfrd11       | 9411   | 3610278   | 1.92543292  | down |
| MACS_PEAK_1200 | 28  | 6.65   | Tnfrd11       | 9411   | 6100110   | 1.765415788 | down |
| MACS_PEAK_1202 | 33  | 11.51  | 2900011Q08Rik | 84070  | 5050168   | 2.581374645 | down |
| MACS_PEAK_1225 | 20  | 9.69   | bdh1          | 1128   | 102470619 | 1.856939673 | down |
| MACS_PEAK_1239 | 27  | 8.64   | Ndufb4        | 30583  | 5690594   | 2.297720194 | up   |
| MACS_PEAK_1240 | 14  | 7.88   | Fst1          | 44745  | 100070746 | 30.46147919 | down |
| MACS_PEAK_1244 | 29  | 9.09   | BC027231      | 58658  | 6840609   | 1.573701859 | down |
| MACS_PEAK_1245 | 17  | 8.48   | BC027231      | 57668  | 6840609   | 1.573701859 | down |
| MACS_PEAK_1249 | 19  | 11.51  | Ift57         | 54188  | 1190541   | 1.671165586 | up   |
| MACS_PEAK_1256 | 25  | 10.91  | Col8a1        | 192761 | 106290072 | 2.177601099 | down |
| MACS_PEAK_1257 | 29  | 10.53  | Robo1         | 395086 | 2900528   | 1.563209176 | down |
| MACS_PEAK_1258 | 27  | 12.12  | Robo1         | 23276  | 2900528   | 1.563209176 | down |
| MACS_PEAK_1259 | 45  | 17.73  | Robo1         | 234077 | 2900528   | 1.563209176 | down |
| MACS_PEAK_1260 | 16  | 6.06   | Robo2         | 95607  | 450136    | 1.660531163 | up   |
| MACS_PEAK_1260 | 16  | 6.06   | Robo2         | 95607  | 100770373 | 1.523898602 | up   |
| MACS_PEAK_1285 | 26  | 14.51  | setd4         | 110075 | 3610047   | 1.624795914 | up   |
| MACS_PEAK_1292 | 41  | 15.15  | Erg           | 131306 | 1770739   | 1.973852038 | down |
| MACS_PEAK_1293 | 27  | 7.27   | Erg           | 121971 | 1770739   | 1.973852038 | down |
| MACS_PEAK_1294 | 23  | 9.09   | Erg           | 60516  | 1770739   | 1.973852038 | down |
| MACS_PEAK_1295 | 21  | 7.88   | Erg           | 56490  | 1770739   | 1.973852038 | down |
| MACS_PEAK_1304 | 17  | 6.06   | Snx9          | 70743  | 3290592   | 1.786275148 | down |
| MACS_PEAK_1305 | 21  | 9.69   | Snx9          | 8305   | 3290592   | 1.786275148 | down |
| MACS_PEAK_1310 | 316 | 164.79 | Fgfr1op       | 14619  | 3290433   | 3.044998169 | down |
| MACS_PEAK_1330 | 32  | 12.9   | Ppp2r1a       | 1284   | 2602079   | 1.922006249 | down |
| MACS_PEAK_1338 | 24  | 10.91  | Ppard         | 12153  | 104280632 | 1.571586847 | down |
| MACS_PEAK_1343 | 33  | 11.51  | Brd2          | 393    | 104760411 | 1.940654516 | down |
| MACS_PEAK_1348 | 18  | 7.27   | Tnfrst21      | 47759  | 6380100   | 1.828891873 | down |
| MACS_PEAK_1353 | 29  | 12.12  | Cdc5l         | 218142 | 3390025   | 1.562691808 | down |
| MACS_PEAK_1357 | 21  | 7.88   | PK7           | 9791   | 380315    | 2.03581214  | up   |
| MACS_PEAK_1361 | 26  | 11.18  | Foxp4         | 51373  | 6280022   | 1.50841601  | up   |
| MACS_PEAK_1388 | 20  | 7.94   | Tgfr1         | 91153  | 2640541   | 1.82399416  | down |
| MACS_PEAK_1388 | 20  | 7.94   | Tgfr1         | 91153  | 2850403   | 3.366029501 | down |
| MACS_PEAK_1389 | 67  | 30.29  | Tgfr1         | 65584  | 2640541   | 1.82399416  | down |
| MACS_PEAK_1389 | 67  | 30.29  | Tgfr1         | 65584  | 2850403   | 3.366029501 | down |
| MACS_PEAK_1390 | 85  | 8.6    | Tgfr1         | 52306  | 2640541   | 1.82399416  | down |
| MACS_PEAK_1390 | 85  | 8.6    | Tgfr1         | 52306  | 2850403   | 3.366029501 | down |
| MACS_PEAK_1395 | 19  | 9.09   | Lbh           | 7783   | 70093     | 1.930043578 | down |
| MACS_PEAK_1396 | 19  | 7.88   | Lbh           | 75475  | 70093     | 1.930043578 | down |
| MACS_PEAK_1401 | 27  | 12.12  | Crim1         | 29271  | 103360519 | 2.418887138 | down |
| MACS_PEAK_1402 | 26  | 9.09   | Cdc42ep3      | 148721 | 2480138   | 2.477018833 | down |
| MACS_PEAK_1402 | 26  | 9.09   | Cdc42ep3      | 148721 | 101450088 | 1.739342928 | down |

|                |     |        |               |         |           |             |      |
|----------------|-----|--------|---------------|---------|-----------|-------------|------|
| MACS_PEAK_1403 | 16  | 7.27   | Cdc42ep3      | 48949   | 2480138   | 2.477018833 | down |
| MACS_PEAK_1403 | 16  | 7.27   | Cdc42ep3      | 48949   | 101450088 | 1.739342928 | down |
| MACS_PEAK_1404 | 16  | 7.88   | Cdc42ep3      | 11903   | 2480138   | 2.477018833 | down |
| MACS_PEAK_1404 | 16  | 7.88   | Cdc42ep3      | 11903   | 101450088 | 1.739342928 | down |
| MACS_PEAK_1415 | 23  | 6.65   | Six2          | 24894   | 1450551   | 2.700210094 | down |
| MACS_PEAK_1416 | 34  | 12.12  | Six2          | 181268  | 1450551   | 2.700210094 | down |
| MACS_PEAK_1417 | 55  | 20.16  | Six2          | 182599  | 1450551   | 2.700210094 | down |
| MACS_PEAK_1418 | 55  | 20.69  | Six2          | 214535  | 1450551   | 2.700210094 | down |
| MACS_PEAK_1419 | 36  | 11.25  | Six2          | 226580  | 1450551   | 2.700210094 | down |
| MACS_PEAK_1435 | 39  | 9.09   | Fzd8          | 599354  | 1990053   | 1.892960548 | down |
| MACS_PEAK_1436 | 28  | 9.09   | Fzd8          | 568196  | 1990053   | 1.892960548 | down |
| MACS_PEAK_1437 | 34  | 17.57  | Fzd8          | 472575  | 1990053   | 1.892960548 | down |
| MACS_PEAK_1438 | 41  | 14.41  | Fzd8          | 344582  | 1990053   | 1.892960548 | down |
| MACS_PEAK_1466 | 17  | 7.88   | Coxc5         | 25817   | 100460601 | 2.226545811 | down |
| MACS_PEAK_1471 | 20  | 6.66   | Yipf5         | 91131   | 2940008   | 1.63463676  | up   |
| MACS_PEAK_1474 | 47  | 21.2   | Stk32a        | 68580   | 102510731 | 1.641725421 | down |
| MACS_PEAK_1493 | 20  | 7.88   | Snx2          | 88618   | 3360364   | 6.765829086 | down |
| MACS_PEAK_1494 | 71  | 18.7   | Snx2          | 78797   | 3360364   | 6.765829086 | down |
| MACS_PEAK_1504 | 20  | 6.04   | Gramd3        | 294752  | 6650546   | 3.307068825 | down |
| MACS_PEAK_1505 | 18  | 9.69   | Gramd3        | 189393  | 6650546   | 3.307068825 | down |
| MACS_PEAK_1506 | 17  | 6.66   | Gramd3        | 36251   | 6650546   | 3.307068825 | down |
| MACS_PEAK_1510 | 58  | 27.36  | Prrc1         | 83518   | 5870273   | 1.73284173  | down |
| MACS_PEAK_1511 | 19  | 9.09   | Prrc1         | 50562   | 5870273   | 1.73284173  | down |
| MACS_PEAK_1515 | 18  | 7.27   | Fbn2          | 95090   | 103830487 | 1.77373563  | up   |
| MACS_PEAK_1518 | 32  | 12.75  | Synpo         | 24185   | 102680377 | 1.866832839 | down |
| MACS_PEAK_1518 | 32  | 12.75  | Synpo         | 24185   | 104760168 | 1.684028506 | down |
| MACS_PEAK_1519 | 40  | 11.55  | Ndst1         | 43660   | 102060286 | 1.803198338 | up   |
| MACS_PEAK_1520 | 53  | 19.39  | Ndst1         | 42707   | 102060286 | 1.803198338 | up   |
| MACS_PEAK_1522 | 27  | 10.91  | Camk2a        | 15055   | 1940112   | 1.617012858 | up   |
| MACS_PEAK_1530 | 20  | 9.69   | Nedd4i        | 45637   | 6380368   | 1.516248822 | down |
| MACS_PEAK_1531 | 52  | 20.13  | Nedd4i        | 51011   | 6380368   | 1.516248822 | down |
| MACS_PEAK_1532 | 44  | 15.75  | Nedd4i        | 94600   | 6380368   | 1.516248822 | down |
| MACS_PEAK_1552 | 35  | 9.78   | Slc14a1       | 26051   | 5700154   | 2.209163189 | down |
| MACS_PEAK_1552 | 35  | 9.78   | Slc14a1       | 26051   | 106420044 | 1.935239077 | down |
| MACS_PEAK_1552 | 35  | 9.78   | Slc14a1       | 26051   | 1580458   | 1.719521284 | down |
| MACS_PEAK_1553 | 46  | 16.84  | Slc14a1       | 2782    | 5700154   | 2.209163189 | down |
| MACS_PEAK_1553 | 46  | 16.84  | Slc14a1       | 2782    | 106420044 | 1.935239077 | down |
| MACS_PEAK_1553 | 46  | 16.84  | Slc14a1       | 2782    | 1580458   | 1.719521284 | down |
| MACS_PEAK_1561 | 72  | 32.34  | Nfatc1        | 76226   | 2320348   | 2.426151514 | down |
| MACS_PEAK_1561 | 72  | 32.34  | Nfatc1        | 76226   | 6180161   | 1.97121489  | down |
| MACS_PEAK_1561 | 72  | 32.34  | Nfatc1        | 76226   | 510400    | 3.104269505 | down |
| MACS_PEAK_1561 | 72  | 32.34  | Nfatc1        | 76226   | 6290136   | 1.625146389 | down |
| MACS_PEAK_1562 | 16  | 5.98   | Nfatc1        | 67424   | 2320348   | 2.426151514 | down |
| MACS_PEAK_1562 | 16  | 5.98   | Nfatc1        | 67424   | 6180161   | 1.97121489  | down |
| MACS_PEAK_1562 | 16  | 5.98   | Nfatc1        | 67424   | 510400    | 3.104269505 | down |
| MACS_PEAK_1562 | 16  | 5.98   | Nfatc1        | 67424   | 6290136   | 1.625146389 | down |
| MACS_PEAK_1563 | 42  | 18.18  | Nfatc1        | 53852   | 2320348   | 2.426151514 | down |
| MACS_PEAK_1563 | 42  | 18.18  | Nfatc1        | 53852   | 6180161   | 1.97121489  | down |
| MACS_PEAK_1563 | 42  | 18.18  | Nfatc1        | 53852   | 510400    | 3.104269505 | down |
| MACS_PEAK_1563 | 42  | 18.18  | Nfatc1        | 53852   | 6290136   | 1.625146389 | down |
| MACS_PEAK_1564 | 29  | 13.93  | Nfatc1        | 2143    | 2320348   | 2.426151514 | down |
| MACS_PEAK_1564 | 29  | 13.93  | Nfatc1        | 2143    | 6180161   | 1.97121489  | down |
| MACS_PEAK_1564 | 29  | 13.93  | Nfatc1        | 2143    | 510400    | 3.104269505 | down |
| MACS_PEAK_1564 | 29  | 13.93  | Nfatc1        | 2143    | 6290136   | 1.625146389 | down |
| MACS_PEAK_1576 | 18  | 8.48   | Firt1         | 49693   | 4540348   | 1.882780433 | up   |
| MACS_PEAK_1581 | 23  | 8.27   | Psat1         | 97586   | 670446    | 2.637450457 | down |
| MACS_PEAK_1582 | 31  | 15.52  | Psat1         | 60641   | 670446    | 2.637450457 | down |
| MACS_PEAK_1583 | 17  | 8.48   | Psat1         | 59354   | 670446    | 2.637450457 | down |
| MACS_PEAK_1594 | 63  | 7.34   | Trpm3         | 132879  | 6400731   | 1.53155458  | down |
| MACS_PEAK_1612 | 197 | 100.57 | Pice1         | 45129   | 4780685   | 1.828465343 | down |
| MACS_PEAK_1613 | 19  | 6      | Pice1         | 16793   | 4780685   | 1.828465343 | down |
| MACS_PEAK_1614 | 106 | 6.83   | Pice1         | 3461    | 4780685   | 1.828465343 | down |
| MACS_PEAK_1694 | 20  | 7.4    | Ak1           | 441     | 130605    | 1.549378395 | up   |
| MACS_PEAK_1702 | 24  | 7.88   | Pbx3          | 142237  | 3710577   | 2.450549364 | down |
| MACS_PEAK_1715 | 18  | 5.45   | Zeb2          | 1330791 | 4150215   | 2.707919359 | up   |
| MACS_PEAK_1731 | 24  | 7.76   | Rbms1         | 51878   | 6400014   | 1.958834078 | down |
| MACS_PEAK_1732 | 40  | 18.18  | Fign          | 85836   | 7006001   | 2.133958101 | down |
| MACS_PEAK_1733 | 27  | 13.33  | Fign          | 74488   | 7006001   | 2.133958101 | down |
| MACS_PEAK_1734 | 23  | 10.3   | Cobll1        | 499     | 6370494   | 1.6672225   | down |
| MACS_PEAK_1749 | 73  | 22.86  | Ttc30b        | 4641    | 106650142 | 1.529625416 | down |
| MACS_PEAK_1752 | 19  | 8.48   | Ube2e3        | 150822  | 101980025 | 2.235800743 | up   |
| MACS_PEAK_1756 | 26  | 9.69   | Ctnnd1        | 14829   | 106400139 | 1.712701678 | up   |
| MACS_PEAK_1761 | 20  | 9.69   | Tspan18       | 43173   | 940435    | 2.772142649 | down |
| MACS_PEAK_1765 | 19  | 7.27   | Aplp          | 70814   | 2810471   | 2.063208818 | down |
| MACS_PEAK_1788 | 36  | 11.35  | Spred1        | 56681   | 6940706   | 2.010764599 | down |
| MACS_PEAK_1794 | 44  | 22.42  | Thbs1         | 330757  | 430288    | 5.464723587 | down |
| MACS_PEAK_1794 | 44  | 22.42  | Thbs1         | 330757  | 4560494   | 5.315876007 | down |
| MACS_PEAK_1795 | 20  | 10.91  | Thbs1         | 317041  | 430288    | 5.464723587 | down |
| MACS_PEAK_1795 | 20  | 10.91  | Thbs1         | 317041  | 4560494   | 5.315876007 | down |
| MACS_PEAK_1796 | 128 | 53.85  | Thbs1         | 12736   | 430288    | 5.464723587 | down |
| MACS_PEAK_1796 | 128 | 53.85  | Thbs1         | 12736   | 4560494   | 5.315876007 | down |
| MACS_PEAK_1804 | 56  | 23.88  | 2010106G01Rik | 648     | 6400541   | 2.33948524  | down |
| MACS_PEAK_1804 | 56  | 23.88  | 2010106G01Rik | 648     | 6550369   | 2.00118947  | down |
| MACS_PEAK_1808 | 66  | 17.21  | Anapc1        | 114060  | 100610463 | 1.925601721 | up   |
| MACS_PEAK_1814 | 65  | 33.32  | 4930402H24Rik | 12224   | 1190164   | 1.547660351 | up   |
| MACS_PEAK_1815 | 27  | 7.06   | Smox          | 14835   | 1940398   | 1.739189863 | down |
| MACS_PEAK_1815 | 27  | 7.06   | Smox          | 14835   | 3390164   | 4.023831844 | down |
| MACS_PEAK_1831 | 19  | 7.27   | Tasp1         | 41036   | 520403    | 1.752894998 | down |
| MACS_PEAK_1832 | 41  | 18.78  | Firt3         | 841962  | 70685     | 2.207974911 | up   |
| MACS_PEAK_1842 | 33  | 10.3   | Pax1          | 261082  | 3360253   | 2.354618549 | up   |
| MACS_PEAK_1844 | 30  | 10.32  | Entpd6        | 16639   | 6450546   | 1.803019047 | down |
| MACS_PEAK_1844 | 30  | 10.32  | Entpd6        | 16639   | 104050088 | 1.828014612 | down |
| MACS_PEAK_1851 | 27  | 10.3   | Bcl2l1        | 11152   | 1580452   | 1.568951726 | down |
| MACS_PEAK_1851 | 27  | 10.3   | Bcl2l1        | 11152   | 5420484   | 1.546980739 | down |
| MACS_PEAK_1863 | 24  | 12.12  | Tgm2          | 38976   | 5360452   | 1.988940001 | down |
| MACS_PEAK_1864 | 28  | 11.51  | Tgm2          | 6692    | 5360452   | 1.988940001 | down |
| MACS_PEAK_1869 | 41  | 8.48   | Chd6          | 149426  | 102480138 | 1.612116575 | up   |
| MACS_PEAK_1876 | 20  | 7.27   | Rbpjl         | 16878   | 5390019   | 2.951968431 | down |
| MACS_PEAK_1877 | 26  | 8.31   | Zfp335        | 55      | 3520181   | 2.12399514  | up   |
| MACS_PEAK_1878 | 17  | 6.06   | Sulf2         | 12779   | 106040113 | 2.373995304 | up   |
| MACS_PEAK_1913 | 23  | 7.5    | Tpd52         | 15738   | 4610541   | 1.524386525 | up   |
| MACS_PEAK_1922 | 44  | 13.6   | Pde7a         | 95058   | 2190041   | 4.084401608 | down |
| MACS_PEAK_1922 | 44  | 13.6   | Pde7a         | 95058   | 1690746   | 2.622594118 | down |
| MACS_PEAK_1929 | 31  | 13.93  | Ect2          | 72553   | 100630538 | 2.233487606 | down |
| MACS_PEAK_1934 | 27  | 9.14   | Fndc3b        | 72011   | 1050687   | 2.314380884 | down |
| MACS_PEAK_1935 | 25  | 9.65   | Fndc3b        | 76292   | 1050687   | 2.314380884 | down |
| MACS_PEAK_1950 | 32  | 12.12  | Bbs12         | 16124   | 106220114 | 1.699396372 | down |
| MACS_PEAK_1965 | 30  | 9.98   | Pcdh10        | 47754   | 3190204   | 1.756918907 | up   |
| MACS_PEAK_1965 | 30  | 9.98   | Pcdh10        | 47754   | 940014    | 1.62713182  | up   |
| MACS_PEAK_1974 | 26  | 11.51  | Postn         | 11642   | 450411    | 4.589205265 | down |
| MACS_PEAK_1975 | 52  | 22.66  | Postn         | 31575   | 450411    | 4.589205265 | down |
| MACS_PEAK_1976 | 22  | 7.88   | Postn         | 82961   | 450411    | 4.589205265 | down |
| MACS_PEAK_1985 | 17  | 7.27   | Pfn2          | 133591  | 5700026   | 2.781931877 | down |
| MACS_PEAK_1989 | 29  | 12.72  | P2y1          | 230684  | 6040121   | 2.169948816 | down |
| MACS_PEAK_2001 | 48  | 26.05  | Shox2         | 278757  | 101850632 | 2.139605284 | up   |
| MACS_PEAK_2002 | 19  | 7.24   | Shox2         | 183291  | 101850632 | 2.139605284 | up   |
| MACS_PEAK_2003 | 21  | 9.69   | B3galnt1      | 100977  | 3390746   | 2.335953236 | down |
| MACS_PEAK_2009 | 21  | 8.48   | Gria2         | 160900  | 5080088   | 1.619322181 | down |
| MACS_PEAK_2042 | 19  | 6.6    | Tbx15         | 5156    | 4610411   | 2.563603878 | down |
| MACS_PEAK_2058 | 29  | 11.08  | Sars          | 33829   | 7100278   | 1.554883003 | up   |
| MACS_PEAK_2084 | 26  | 8.31   | 5730508B09Rik | 451603  | 101980537 | 2.213041544 | down |
| MACS_PEAK_2090 | 24  | 12.12  | Lef1          | 7994    | 7100288   | 1.737193108 | down |

|                |     |       |          |         |           |             |      |
|----------------|-----|-------|----------|---------|-----------|-------------|------|
| MACS_PEAk_2091 | 18  | 8.48  | Lef1     | 25166   | 7100288   | 1.737193108 | down |
| MACS_PEAk_2092 | 42  | 21.81 | Bdh2     | 70      | 1770397   | 1.987216711 | up   |
| MACS_PEAk_2093 | 26  | 10.91 | Slc39a8  | 79658   | 6860537   | 1.50484395  | down |
| MACS_PEAk_2116 | 21  | 6.66  | Cyr61    | 988     | 5290026   | 3.337931395 | down |
| MACS_PEAk_2117 | 39  | 5.63  | Cyr61    | 669     | 5290026   | 3.337931395 | down |
| MACS_PEAk_2118 | 47  | 9.04  | Cyr61    | 53749   | 5290026   | 3.337931395 | down |
| MACS_PEAk_2119 | 27  | 12.72 | Ddah1    | 20853   | 6400750   | 2.672152281 | down |
| MACS_PEAk_2120 | 18  | 7.88  | Ddah1    | 42144   | 6400750   | 2.672152281 | down |
| MACS_PEAk_2131 | 30  | 13.93 | Tox      | 166429  | 3440053   | 4.584356308 | down |
| MACS_PEAk_2132 | 21  | 7.88  | Tox      | 67932   | 3440053   | 4.584356308 | down |
| MACS_PEAk_2133 | 35  | 7.62  | Tox      | 567709  | 3440053   | 4.584356308 | down |
| MACS_PEAk_2141 | 84  | 27.87 | Mmp16    | 316602  | 106290731 | 2.130325556 | up   |
| MACS_PEAk_2160 | 19  | 10.91 | Sec61b   | 265002  | 840113    | 1.852417946 | down |
| MACS_PEAk_2166 | 32  | 9.28  | Smc2     | 569641  | 4810133   | 2.254477501 | down |
| MACS_PEAk_2178 | 39  | 19.72 | Rgs3     | 43789   | 60670     | 1.874791026 | down |
| MACS_PEAk_2179 | 33  | 10.3  | Rgs3     | 54619   | 60670     | 1.874791026 | down |
| MACS_PEAk_2188 | 48  | 9.02  | Ptprd    | 2062221 | 3120097   | 1.835583448 | up   |
| MACS_PEAk_2191 | 24  | 11.51 | Mpdz     | 219854  | 4050577   | 1.670507431 | down |
| MACS_PEAk_2192 | 25  | 11.51 | Mpdz     | 219854  | 1990064   | 2.104254484 | down |
| MACS_PEAk_2192 | 25  | 9.87  | Mpdz     | 109327  | 4050577   | 1.670507431 | down |
| MACS_PEAk_2192 | 25  | 9.87  | Mpdz     | 109327  | 1990064   | 2.104254484 | down |
| MACS_PEAk_2193 | 37  | 9.98  | Mpdz     | 185853  | 4050577   | 1.670507431 | down |
| MACS_PEAk_2193 | 37  | 9.98  | Mpdz     | 185853  | 1990064   | 2.104254484 | down |
| MACS_PEAk_2194 | 22  | 9.09  | Mpdz     | 484008  | 4050577   | 1.670507431 | down |
| MACS_PEAk_2194 | 22  | 9.09  | Mpdz     | 484008  | 1990064   | 2.104254484 | down |
| MACS_PEAk_2234 | 48  | 24.84 | Ror1     | 119057  | 6220026   | 1.958731174 | down |
| MACS_PEAk_2274 | 43  | 19.39 | Bsd1     | 10008   | 4670484   | 2.169983625 | up   |
| MACS_PEAk_2282 | 65  | 25.4  | Pafah2   | 422     | 6510014   | 1.688534498 | down |
| MACS_PEAk_2286 | 30  | 8.96  | Clic4    | 25614   | 3290368   | 3.674860239 | down |
| MACS_PEAk_2286 | 30  | 8.96  | Clic4    | 25614   | 6450181   | 4.74880743  | down |
| MACS_PEAk_2287 | 32  | 11.84 | Srrm1    | 15465   | 6110025   | 1.615817308 | up   |
| MACS_PEAk_2298 | 28  | 12.19 | Arhgef19 | 2182    | 940102    | 1.560842991 | down |
| MACS_PEAk_2312 | 41  | 17.57 | Rere     | 91065   | 3940279   | 1.924082041 | up   |
| MACS_PEAk_2325 | 20  | 6.6   | Cdk6     | 55999   | 4920253   | 1.7740798   | down |
| MACS_PEAk_2336 | 29  | 11.51 | Sema3e   | 65519   | 3870707   | 1.784626603 | down |
| MACS_PEAk_2353 | 23  | 10.91 | Fgfr3    | 29252   | 6020021   | 1.774785995 | down |
| MACS_PEAk_2353 | 23  | 10.91 | Fgfr3    | 29252   | 5390632   | 5.08995192  | down |
| MACS_PEAk_2361 | 21  | 7.76  | Rab28    | 620331  | 103990458 | 2.852120628 | down |
| MACS_PEAk_2361 | 21  | 7.76  | Rab28    | 620331  | 100070053 | 1.852225065 | down |
| MACS_PEAk_2363 | 22  | 6.66  | Ltb2     | 110571  | 5670441   | 2.367152691 | down |
| MACS_PEAk_2364 | 24  | 11.51 | Ltb2     | 101425  | 5670441   | 2.367152691 | down |
| MACS_PEAk_2366 | 172 | 65.43 | Gpr125   | 63902   | 6380025   | 2.239007235 | down |
| MACS_PEAk_2367 | 20  | 7.76  | Gpr125   | 137712  | 6380025   | 2.239007235 | down |
| MACS_PEAk_2372 | 24  | 9.69  | Pcdh7    | 245039  | 104780333 | 1.514340878 | up   |
| MACS_PEAk_2399 | 22  | 9.98  | Chic2    | 33603   | 101980039 | 1.743302584 | down |
| MACS_PEAk_2404 | 21  | 8.48  | Lphn3    | 880742  | 106400315 | 1.745946884 | down |
| MACS_PEAk_2404 | 21  | 8.48  | Lphn3    | 880742  | 103060309 | 1.831612229 | down |
| MACS_PEAk_2405 | 29  | 10.85 | Lphn3    | 134615  | 106400315 | 1.745946884 | down |
| MACS_PEAk_2405 | 29  | 10.85 | Lphn3    | 134615  | 103060309 | 1.831612229 | down |
| MACS_PEAk_2406 | 26  | 12.72 | Lphn3    | 197334  | 106400315 | 1.745946884 | down |
| MACS_PEAk_2406 | 26  | 12.72 | Lphn3    | 197334  | 103060309 | 1.831612229 | down |
| MACS_PEAk_2407 | 45  | 20.6  | Lphn3    | 204022  | 106400315 | 1.745946884 | down |
| MACS_PEAk_2407 | 45  | 20.6  | Lphn3    | 204022  | 103060309 | 1.831612229 | down |
| MACS_PEAk_2408 | 41  | 17.57 | Lphn3    | 302955  | 106400315 | 1.745946884 | down |
| MACS_PEAk_2408 | 41  | 17.57 | Lphn3    | 302955  | 103060309 | 1.831612229 | down |
| MACS_PEAk_2420 | 49  | 21.81 | Aff1     | 17775   | 100780731 | 2.008762598 | up   |
| MACS_PEAk_2426 | 40  | 8.48  | Lrrc8d   | 19358   | 1780014   | 1.506517887 | down |
| MACS_PEAk_2427 | 32  | 13.93 | Lrrc8d   | 15192   | 1780014   | 1.506517887 | down |
| MACS_PEAk_2492 | 18  | 6.66  | Zfp113   | 29      | 1770193   | 2.064691067 | up   |
| MACS_PEAk_2495 | 19  | 7.88  | Uncx     | 75869   | 2060142   | 1.693639398 | up   |
| MACS_PEAk_2510 | 31  | 7.62  | Hmgb1    | 47816   | 102640685 | 2.085407734 | down |
| MACS_PEAk_2528 | 27  | 13.33 | Asns     | 40397   | 110368    | 3.113725662 | down |
| MACS_PEAk_2530 | 31  | 12.12 | Gilcc1   | 88205   | 3290070   | 2.098738909 | down |
| MACS_PEAk_2548 | 24  | 9.09  | Klhdc10  | 260     | 3870047   | 2.631810665 | down |
| MACS_PEAk_2558 | 49  | 23.02 | Pikna4   | 148501  | 102450484 | 4.854547024 | up   |
| MACS_PEAk_2564 | 27  | 8.48  | Ptn      | 35983   | 5910161   | 1.975698113 | down |
| MACS_PEAk_2565 | 30  | 6.1   | Ptn      | 26324   | 5910161   | 1.975698113 | up   |
| MACS_PEAk_2574 | 160 | 3.58  | Hipk2    | 6720    | 6350647   | 2.047196627 | down |
| MACS_PEAk_2576 | 29  | 14.54 | Igf2bp3  | 21559   | 2810161   | 1.510372758 | up   |
| MACS_PEAk_2585 | 77  | 35.14 | Hoxa9    | 752     | 4730040   | 1.513581157 | down |
| MACS_PEAk_2588 | 119 | 22.99 | Scrn1    | 11833   | 6580019   | 1.527701139 | down |
| MACS_PEAk_2594 | 70  | 34.53 | Gng12    | 35473   | 100060446 | 1.896968961 | down |
| MACS_PEAk_2598 | 36  | 11.51 | Tgolin1  | 69780   | 4920433   | 2.579447985 | down |
| MACS_PEAk_2598 | 36  | 11.51 | Tgolin1  | 69780   | 3060270   | 1.883389592 | down |
| MACS_PEAk_2606 | 31  | 12.75 | Rtkn     | 71      | 6380082   | 1.949686885 | down |
| MACS_PEAk_2614 | 21  | 6.64  | Mgll     | 8545    | 2030446   | 1.527316213 | down |
| MACS_PEAk_2615 | 46  | 8.94  | Mgll     | 26346   | 2030446   | 1.527316213 | down |
| MACS_PEAk_2618 | 28  | 8.53  | Fbln2    | 11670   | 3440215   | 2.287607193 | down |
| MACS_PEAk_2635 | 30  | 12.72 | Pdzrn3   | 114272  | 2340131   | 1.666963577 | up   |
| MACS_PEAk_2636 | 24  | 8.13  | Pdzrn3   | 69647   | 2340131   | 1.666963577 | up   |
| MACS_PEAk_2637 | 22  | 7.84  | Pdzrn3   | 95517   | 2340131   | 1.666963577 | up   |
| MACS_PEAk_2644 | 26  | 11.51 | Lmccl1   | 37814   | 1740484   | 2.61391334  | down |
| MACS_PEAk_2663 | 18  | 6.66  | Cd9      | 27240   | 4730041   | 2.94108367  | down |
| MACS_PEAk_2664 | 51  | 9.38  | Cd9      | 26427   | 4730041   | 2.94108367  | down |
| MACS_PEAk_2665 | 42  | 4.12  | Ccnd2    | 101100  | 102350114 | 1.814499736 | up   |
| MACS_PEAk_2679 | 51  | 19.99 | Eps8     | 95042   | 7050204   | 2.723695993 | down |
| MACS_PEAk_2680 | 21  | 9.69  | Eps8     | 15135   | 7050204   | 2.723695993 | down |
| MACS_PEAk_2681 | 22  | 10.45 | Eps8     | 11685   | 7050204   | 2.723695993 | down |
| MACS_PEAk_2684 | 39  | 18.78 | Pde3a    | 115022  | 105860180 | 1.686952591 | down |
| MACS_PEAk_2692 | 77  | 39.99 | Sox5     | 228314  | 3190128   | 3.311142206 | down |
| MACS_PEAk_2692 | 77  | 39.99 | Sox5     | 228314  | 2370576   | 4.999372005 | down |
| MACS_PEAk_2692 | 77  | 39.99 | Sox5     | 228314  | 2900167   | 8.529214859 | down |
| MACS_PEAk_2693 | 115 | 29.46 | Sox5     | 170159  | 3190128   | 3.311142206 | down |
| MACS_PEAk_2693 | 115 | 29.46 | Sox5     | 170159  | 2370576   | 4.999372005 | down |
| MACS_PEAk_2693 | 115 | 29.46 | Sox5     | 170159  | 2900167   | 8.529214859 | down |
| MACS_PEAk_2694 | 23  | 7.27  | Sox5     | 152690  | 3190128   | 3.311142206 | down |
| MACS_PEAk_2694 | 23  | 7.27  | Sox5     | 152690  | 2370576   | 4.999372005 | down |
| MACS_PEAk_2694 | 23  | 7.27  | Sox5     | 152690  | 2900167   | 8.529214859 | down |
| MACS_PEAk_2695 | 26  | 11.51 | Sox5     | 127093  | 3190128   | 3.311142206 | down |
| MACS_PEAk_2695 | 26  | 11.51 | Sox5     | 127093  | 2370576   | 4.999372005 | down |
| MACS_PEAk_2695 | 26  | 11.51 | Sox5     | 127093  | 2900167   | 8.529214859 | down |
| MACS_PEAk_2696 | 21  | 7.27  | Sox5     | 43306   | 3190128   | 3.311142206 | down |
| MACS_PEAk_2696 | 21  | 7.27  | Sox5     | 43306   | 2370576   | 4.999372005 | down |
| MACS_PEAk_2696 | 21  | 7.27  | Sox5     | 43306   | 2900167   | 8.529214859 | down |
| MACS_PEAk_2697 | 19  | 7.27  | Sox5     | 39678   | 3190128   | 3.311142206 | down |
| MACS_PEAk_2697 | 19  | 7.27  | Sox5     | 39678   | 2370576   | 4.999372005 | down |
| MACS_PEAk_2697 | 19  | 7.27  | Sox5     | 39678   | 2900167   | 8.529214859 | down |
| MACS_PEAk_2698 | 51  | 17.57 | Sox5     | 11700   | 3190128   | 3.311142206 | down |
| MACS_PEAk_2698 | 51  | 17.57 | Sox5     | 11700   | 2370576   | 4.999372005 | down |
| MACS_PEAk_2698 | 51  | 17.57 | Sox5     | 11700   | 2900167   | 8.529214859 | down |
| MACS_PEAk_2699 | 94  | 28.26 | Sox5     | 602     | 3190128   | 3.311142206 | down |
| MACS_PEAk_2699 | 94  | 28.26 | Sox5     | 602     | 2370576   | 4.999372005 | down |
| MACS_PEAk_2699 | 94  | 28.26 | Sox5     | 602     | 2900167   | 8.529214859 | down |
| MACS_PEAk_2700 | 39  | 12.12 | Sox5     | 54782   | 3190128   | 3.311142206 | down |
| MACS_PEAk_2700 | 39  | 12.12 | Sox5     | 54782   | 2370576   | 4.999372005 | down |
| MACS_PEAk_2700 | 39  | 12.12 | Sox5     | 54782   | 2900167   | 8.529214859 | down |
| MACS_PEAk_2701 | 41  | 12.12 | Sox5     | 103287  | 3190128   | 3.311142206 | down |
| MACS_PEAk_2701 | 41  | 12.12 | Sox5     | 103287  | 2370576   | 4.999372005 | down |
| MACS_PEAk_2701 | 41  | 12.12 | Sox5     | 103287  | 2900167   | 8.529214859 | down |
| MACS_PEAk_2707 | 20  | 8.48  | Kras     | 8758    | 1240026   | 1.503148794 | up   |
| MACS_PEAk_2708 | 29  | 9.85  | Tuba3b   | 10444   | 5290521   | 1.886989355 | up   |
| MACS_PEAk_2724 | 31  | 12.12 | Mia1     | 320     | 5700273   | 12.40242386 | down |

|                |     |        |               |         |           |             |      |
|----------------|-----|--------|---------------|---------|-----------|-------------|------|
| MACS_PEAk_2726 | 33  | 14.54  | Ech1          | 4806    | 4120746   | 1.582007647 | up   |
| MACS_PEAk_2727 | 17  | 6.06   | Actn4         | 38227   | 4590390   | 2.610746384 | down |
| MACS_PEAk_2727 | 17  | 6.06   | Actn4         | 38227   | 7050132   | 7.594707966 | down |
| MACS_PEAk_2727 | 17  | 6.06   | Actn4         | 38227   | 3840301   | 1.867175221 | down |
| MACS_PEAk_2762 | 15  | 7.88   | St8sia2       | 104938  | 2680082   | 1.841214657 | up   |
| MACS_PEAk_2763 | 18  | 6.66   | St8sia2       | 106884  | 2680082   | 1.841214657 | up   |
| MACS_PEAk_2767 | 19  | 8.48   | Akap13        | 119844  | 101450594 | 1.573993444 | up   |
| MACS_PEAk_2795 | 40  | 5.23   | Wnt11         | 138437  | 103840154 | 1.608444022 | up   |
| MACS_PEAk_2795 | 40  | 5.23   | Wnt11         | 138437  | 1230278   | 1.79390502  | up   |
| MACS_PEAk_2807 | 24  | 9.69   | Tpp1          | 15536   | 3990446   | 1.962062359 | up   |
| MACS_PEAk_2813 | 22  | 10.3   | Usp47         | 60141   | 105900047 | 1.575356126 | down |
| MACS_PEAk_2819 | 30  | 8.76   | Sox6          | 623750  | 6840717   | 3.285536766 | down |
| MACS_PEAk_2819 | 30  | 8.76   | Sox6          | 623750  | 4070601   | 1.792667627 | down |
| MACS_PEAk_2820 | 19  | 6.06   | Sox6          | 606397  | 6840717   | 3.285536766 | down |
| MACS_PEAk_2820 | 19  | 6.06   | Sox6          | 606397  | 4070601   | 1.792667627 | down |
| MACS_PEAk_2821 | 67  | 15.15  | Sox6          | 520828  | 6840717   | 3.285536766 | down |
| MACS_PEAk_2821 | 67  | 15.15  | Sox6          | 520828  | 4070601   | 1.792667627 | down |
| MACS_PEAk_2822 | 104 | 26.05  | Sox6          | 379119  | 6840717   | 3.285536766 | down |
| MACS_PEAk_2822 | 104 | 26.05  | Sox6          | 379119  | 4070601   | 1.792667627 | down |
| MACS_PEAk_2823 | 19  | 7.27   | Sox6          | 370044  | 6840717   | 3.285536766 | down |
| MACS_PEAk_2823 | 19  | 7.27   | Sox6          | 370044  | 4070601   | 1.792667627 | down |
| MACS_PEAk_2824 | 23  | 8.48   | Sox6          | 325646  | 6840717   | 3.285536766 | down |
| MACS_PEAk_2824 | 23  | 8.48   | Sox6          | 325646  | 4070601   | 1.792667627 | down |
| MACS_PEAk_2825 | 34  | 8.48   | Sox6          | 170346  | 6840717   | 3.285536766 | down |
| MACS_PEAk_2825 | 34  | 8.48   | Sox6          | 170346  | 4070601   | 1.792667627 | down |
| MACS_PEAk_2826 | 30  | 6.65   | Sox6          | 129107  | 6840717   | 3.285536766 | down |
| MACS_PEAk_2826 | 30  | 6.65   | Sox6          | 129107  | 4070601   | 1.792667627 | down |
| MACS_PEAk_2827 | 21  | 10.3   | Sox6          | 50460   | 6840717   | 3.285536766 | down |
| MACS_PEAk_2827 | 21  | 10.3   | Sox6          | 50460   | 4070601   | 1.792667627 | down |
| MACS_PEAk_2841 | 63  | 30.29  | Rgs10         | 6904    | 2340292   | 2.4998281   | up   |
| MACS_PEAk_2848 | 17  | 5.45   | Plekha1       | 31372   | 1780059   | 1.997643352 | down |
| MACS_PEAk_2867 | 21  | 9.09   | Tssc4         | 47      | 3140731   | 1.620042682 | down |
| MACS_PEAk_2878 | 27  | 13.33  | Efnb2         | 800417  | 5340136   | 2.006764174 | up   |
| MACS_PEAk_2879 | 198 | 104.21 | Efnb2         | 350258  | 5340136   | 2.006764174 | up   |
| MACS_PEAk_2880 | 52  | 23.02  | Efnb2         | 41034   | 5340136   | 2.006764174 | up   |
| MACS_PEAk_2889 | 48  | 6.81   | Xkr5          | 515     | 2230441   | 1.539257407 | up   |
| MACS_PEAk_2892 | 23  | 10.3   | 1810011010Rik | 6879    | 104670091 | 1.849844472 | up   |
| MACS_PEAk_2896 | 27  | 18.78  | Prosc         | 4670    | 380484    | 4.061861992 | down |
| MACS_PEAk_2899 | 29  | 11.51  | Lonrf1        | 33745   | 100670136 | 2.00988245  | down |
| MACS_PEAk_2905 | 17  | 6.06   | Mtus1         | 39846   | 780348    | 1.660579801 | up   |
| MACS_PEAk_2916 | 22  | 7.88   | Slc25a4       | 40227   | 2360519   | 2.12780714  | up   |
| MACS_PEAk_2926 | 19  | 6.66   | Scrg1         | 54069   | 2060541   | 1.8617239   | down |
| MACS_PEAk_2928 | 43  | 11.79  | Sh3rf1        | 77693   | 1190463   | 1.549773216 | up   |
| MACS_PEAk_2939 | 56  | 32.11  | Ints10        | 178     | 2126009   | 1.54038012  | up   |
| MACS_PEAk_2944 | 72  | 30.9   | Rab8a         | 3102    | 6020736   | 1.560746551 | up   |
| MACS_PEAk_2944 | 72  | 30.9   | Rab8a         | 3102    | 3610594   | 1.825872421 | up   |
| MACS_PEAk_2948 | 70  | 36.35  | Zfp827        | 50988   | 5670021   | 2.582318783 | up   |
| MACS_PEAk_2959 | 23  | 10.91  | Lyl1          | 27125   | 2900242   | 2.016277552 | up   |
| MACS_PEAk_2960 | 150 | 76.05  | Nfx           | 35960   | 2450152   | 1.575346112 | down |
| MACS_PEAk_2961 | 26  | 7.5    | Nfx           | 30148   | 2450152   | 1.575346112 | down |
| MACS_PEAk_2962 | 264 | 147.83 | Lomp2         | 20578   | 5290687   | 1.659163117 | up   |
| MACS_PEAk_2968 | 22  | 12.72  | Cytl          | 95809   | 104560066 | 2.36933175  | up   |
| MACS_PEAk_3000 | 22  | 10.91  | Zfh3          | 41132   | 700465    | 1.900578856 | up   |
| MACS_PEAk_3003 | 30  | 10.91  | Mon1b         | 245818  | 102480270 | 1.941350937 | up   |
| MACS_PEAk_3036 | 35  | 6.21   | Mami2         | 38588   | 102100093 | 1.647469759 | down |
| MACS_PEAk_3037 | 28  | 11.68  | Mami2         | 3242    | 102100093 | 1.647469759 | down |
| MACS_PEAk_3041 | 35  | 16.96  | Fat3          | 150057  | 105670446 | 2.421111107 | up   |
| MACS_PEAk_3047 | 37  | 15.1   | Bbs9          | 54130   | 4540368   | 1.631353974 | down |
| MACS_PEAk_3061 | 39  | 15.94  | Kirrel3       | 69351   | 2630195   | 1.939929843 | down |
| MACS_PEAk_3064 | 47  | 12.72  | Cdon          | 46199   | 104810102 | 1.829356194 | down |
| MACS_PEAk_3065 | 21  | 9.69   | Cdon          | 41577   | 104810102 | 1.829356194 | down |
| MACS_PEAk_3077 | 29  | 13.33  | Dpagt1        | 289     | 1850324   | 1.541120768 | up   |
| MACS_PEAk_3084 | 24  | 9.69   | Ncam1         | 19      | 105690114 | 1.675677061 | up   |
| MACS_PEAk_3090 | 64  | 8.94   | Ppcdc         | 19684   | 1410619   | 1.588259459 | up   |
| MACS_PEAk_3097 | 21  | 7.88   | Adpgk         | 285     | 4200164   | 1.868386626 | up   |
| MACS_PEAk_3101 | 25  | 8.48   | Tle3          | 87198   | 105270110 | 1.855359912 | up   |
| MACS_PEAk_3102 | 42  | 20.6   | Tle3          | 21070   | 105270110 | 1.855359912 | up   |
| MACS_PEAk_3103 | 84  | 30.48  | Tle3          | 93      | 105270110 | 1.855359912 | up   |
| MACS_PEAk_3104 | 19  | 9.69   | Tle3          | 33093   | 105270110 | 1.855359912 | up   |
| MACS_PEAk_3105 | 30  | 10.3   | Tle3          | 167042  | 105270110 | 1.855359912 | up   |
| MACS_PEAk_3106 | 22  | 10.91  | Tle3          | 177533  | 105270110 | 1.855359912 | up   |
| MACS_PEAk_3107 | 36  | 8.61   | Tle3          | 207365  | 105270110 | 1.855359912 | up   |
| MACS_PEAk_3108 | 27  | 7.32   | Tle3          | 246197  | 105270110 | 1.855359912 | up   |
| MACS_PEAk_3127 | 16  | 8.48   | Myo1e         | 62199   | 105890411 | 2.609994411 | up   |
| MACS_PEAk_3128 | 18  | 8.48   | Myo1e         | 74220   | 105890411 | 2.609994411 | up   |
| MACS_PEAk_3134 | 68  | 28.96  | Unc13c        | 37362   | 106350110 | 1.754839301 | up   |
| MACS_PEAk_3143 | 18  | 6.66   | Cd109         | 264886  | 130014    | 1.82360971  | down |
| MACS_PEAk_3143 | 18  | 6.66   | Cd109         | 264886  | 540152    | 1.708335042 | down |
| MACS_PEAk_3144 | 24  | 12.12  | Cd109         | 310704  | 130014    | 1.82360971  | down |
| MACS_PEAk_3144 | 24  | 12.12  | Cd109         | 310704  | 540152    | 1.708335042 | down |
| MACS_PEAk_3152 | 15  | 8.48   | Tmed3         | 30704   | 6904605   | 2.500233935 | down |
| MACS_PEAk_3159 | 123 | 55.74  | Acpl2         | 34328   | 1600736   | 1.52339724  | down |
| MACS_PEAk_3159 | 123 | 55.74  | Acpl2         | 34328   | 6200364   | 2.482869387 | down |
| MACS_PEAk_3160 | 23  | 10.3   | Spsb4         | 56038   | 4070673   | 1.836065888 | down |
| MACS_PEAk_3181 | 24  | 6.58   | Ptpn23        | 23484   | 130110    | 2.744419813 | up   |
| MACS_PEAk_3185 | 21  | 6.06   | Susd5         | 14679   | 103830014 | 1.583449841 | down |
| MACS_PEAk_3186 | 25  | 5.63   | Susd5         | 55132   | 103830014 | 1.583449841 | down |
| MACS_PEAk_3187 | 18  | 7.88   | Tgfr2         | 253205  | 6550398   | 2.211287975 | down |
| MACS_PEAk_3188 | 31  | 11.68  | Tgfr2         | 469272  | 6550398   | 2.211287975 | down |
| MACS_PEAk_3208 | 26  | 8.87   | Deb1          | 1248    | 5720082   | 1.929145098 | down |
| MACS_PEAk_3246 | 47  | 21.81  | Diap2         | 397199  | 100840398 | 1.756209016 | down |
| MACS_PEAk_3253 | 18  | 7.88   | Sh3kbp1       | 13415   | 2850458   | 2.331632614 | down |
| MACS_PEAk_3254 | 21  | 12.72  | Sh3kbp1       | 16      | 2850458   | 2.331632614 | down |
| MACS_PEAk_2    | 34  | 13.33  | Rrs1          | 19345   | 4560551   | 1.514943242 | up   |
| MACS_PEAk_7    | 23  | 9.47   | Stau2         | 269866  | 2810411   | 1.965145826 | down |
| MACS_PEAk_7    | 23  | 9.47   | Stau2         | 269866  | 100110041 | 3.7445775   | down |
| MACS_PEAk_48   | 27  | 11.51  | 913002AF11Rik | 124768  | 101980091 | 1.864141822 | down |
| MACS_PEAk_107  | 22  | 10.3   | St8sia4       | 633953  | 3060215   | 2.122776031 | up   |
| MACS_PEAk_113  | 21  | 6.1    | Vps4b         | 36738   | 3440332   | 2.351050854 | up   |
| MACS_PEAk_122  | 43  | 14.07  | Marco         | 147525  | 870056    | 2.083778143 | up   |
| MACS_PEAk_130  | 37  | 16.36  | Thsd7b        | 623626  | 2570750   | 1.682179809 | up   |
| MACS_PEAk_150  | 36  | 13.85  | Tsen15        | 21094   | 430270    | 2.167198658 | down |
| MACS_PEAk_151  | 28  | 12.12  | Tsen15        | 68752   | 430270    | 2.167198658 | down |
| MACS_PEAk_157  | 29  | 9.09   | Glul          | 290270  | 6040253   | 2.251183271 | up   |
| MACS_PEAk_190  | 18  | 7.88   | Efcab2        | 327294  | 3190358   | 1.514025807 | down |
| MACS_PEAk_191  | 99  | 34.4   | Efcab2        | 415365  | 3190358   | 1.514025807 | down |
| MACS_PEAk_195  | 14  | 7.88   | Itpkb         | 63135   | 102100373 | 1.975757837 | up   |
| MACS_PEAk_196  | 17  | 8.48   | Itpkb         | 73660   | 102100373 | 1.975757837 | up   |
| MACS_PEAk_212  | 34  | 13.33  | Sertad4       | 115060  | 130593    | 1.795625091 | down |
| MACS_PEAk_220  | 26  | 12.12  | Ust           | 431639  | 104660253 | 1.561433434 | up   |
| MACS_PEAk_236  | 56  | 29.69  | Ctgf          | 214349  | 4540577   | 4.026632813 | down |
| MACS_PEAk_237  | 33  | 13.93  | Mxd1          | 235263  | 2450301   | 3.239943504 | down |
| MACS_PEAk_238  | 76  | 35.74  | Ctgf          | 69465   | 4540577   | 4.026632813 | down |
| MACS_PEAk_275  | 14  | 8.48   | Ascc3         | 1138937 | 6550132   | 1.935636044 | down |
| MACS_PEAk_285  | 21  | 7.27   | Chst3         | 67957   | 2370131   | 1.71955502  | down |
| MACS_PEAk_305  | 39  | 15.75  | Bsg           | 8139    | 2900193   | 2.248334885 | down |
| MACS_PEAk_309  | 63  | 10.03  | Chst11        | 30180   | 6760546   | 1.705717921 | down |
| MACS_PEAk_321  | 17  | 7.88   | BC030307      | 95415   | 105050575 | 1.571127295 | up   |
| MACS_PEAk_323  | 26  | 7.27   | Tmpo          | 687637  | 102060411 | 4.569718361 | down |
| MACS_PEAk_323  | 26  | 7.27   | Tmpo          | 687637  | 105670161 | 1.981946707 | down |
| MACS_PEAk_323  | 26  | 7.27   | Tmpo          | 687637  | 102760300 | 5.473426819 | down |
| MACS_PEAk_324  | 24  | 8.53   | Tmpo          | 864763  | 102060411 | 4.569718361 | down |

|                |     |       |               |         |           |             |      |
|----------------|-----|-------|---------------|---------|-----------|-------------|------|
| MACS_PEAK_324  | 24  | 8.53  | Tmpo          | 864763  | 105670161 | 1.981946707 | down |
| MACS_PEAK_324  | 24  | 8.53  | Tmpo          | 864763  | 102760300 | 5.473426819 | down |
| MACS_PEAK_331  | 30  | 7.34  | Btg1          | 491001  | 6200133   | 16.80504227 | down |
| MACS_PEAK_333  | 18  | 7.88  | Dcn           | 653063  | 5900711   | 6.7773633   | down |
| MACS_PEAK_333  | 18  | 7.88  | Dcn           | 653063  | 6550092   | 2.875388622 | down |
| MACS_PEAK_334  | 19  | 6.1   | Btg1          | 696764  | 6200133   | 16.80504227 | down |
| MACS_PEAK_340  | 21  | 9.69  | Slc6a15       | 612724  | 6040017   | 3.621177435 | down |
| MACS_PEAK_344  | 20  | 7.27  | Krr1          | 455823  | 6130504   | 3.11702013  | down |
| MACS_PEAK_345  | 37  | 14.07 | Krr1          | 379701  | 6130504   | 3.11702013  | down |
| MACS_PEAK_351  | 19  | 8.31  | Ptprb         | 69936   | 5220053   | 2.290420294 | up   |
| MACS_PEAK_355  | 33  | 4.62  | Cpsf6         | 210019  | 100780500 | 1.602885008 | up   |
| MACS_PEAK_362  | 25  | 10.3  | Hmga2         | 99432   | 5130279   | 2.021983624 | up   |
| MACS_PEAK_363  | 32  | 9.65  | Hmga2         | 59593   | 5130279   | 2.021983624 | up   |
| MACS_PEAK_365  | 28  | 7.72  | Hmga2         | 275019  | 5130279   | 2.021983624 | up   |
| MACS_PEAK_367  | 20  | 6.28  | Wif1          | 172278  | 7100184   | 2.992610455 | down |
| MACS_PEAK_368  | 55  | 16.96 | Wif1          | 216755  | 7100184   | 2.992610455 | down |
| MACS_PEAK_385  | 17  | 8.48  | Zmiz2         | 10570   | 5700382   | 1.840798736 | up   |
| MACS_PEAK_389  | 22  | 9.09  | Tns3          | 285633  | 6380242   | 1.662731886 | down |
| MACS_PEAK_390  | 44  | 18.18 | Tns3          | 294179  | 6380242   | 1.662731886 | down |
| MACS_PEAK_411  | 29  | 12.72 | Ccdc99        | 370719  | 4210091   | 1.664839625 | down |
| MACS_PEAK_426  | 17  | 5.45  | Mapk9         | 51715   | 4070397   | 4.267343521 | down |
| MACS_PEAK_427  | 19  | 6.1   | Gfpt2         | 51075   | 2370129   | 2.037197351 | down |
| MACS_PEAK_428  | 19  | 6.66  | Mapk9         | 423010  | 4070397   | 4.267343521 | down |
| MACS_PEAK_435  | 48  | 26.05 | Gm2a          | 27079   | 430095    | 1.636600494 | up   |
| MACS_PEAK_436  | 31  | 16.36 | Gria1         | 422660  | 100580563 | 1.693127275 | up   |
| MACS_PEAK_446  | 46  | 12.12 | Pmp22         | 47213   | 6550072   | 12.38402176 | down |
| MACS_PEAK_446  | 46  | 12.12 | Pmp22         | 47213   | 4010239   | 2.244052887 | down |
| MACS_PEAK_447  | 40  | 16.36 | Hs3st3b1      | 458330  | 105550114 | 1.865917325 | down |
| MACS_PEAK_447  | 40  | 16.36 | Hs3st3b1      | 458330  | 101340047 | 2.216298819 | down |
| MACS_PEAK_470  | 189 | 96.98 | Evi2a         | 53854   | 6840110   | 2.567021608 | up   |
| MACS_PEAK_480  | 27  | 10.3  | Dhx40         | 50027   | 360672    | 1.63516438  | up   |
| MACS_PEAK_502  | 68  | 26.05 | Col1a1        | 19068   | 730020    | 1.851671576 | up   |
| MACS_PEAK_512  | 22  | 8.48  | Vat1          | 11272   | 1050040   | 2.656697989 | up   |
| MACS_PEAK_531  | 43  | 21.2  | Kcnj2         | 978397  | 630019    | 2.289093971 | down |
| MACS_PEAK_546  | 31  | 9.09  | Wbp2          | 17615   | 3170128   | 1.767673254 | down |
| MACS_PEAK_549  | 40  | 17.18 | 281000809Rik  | 30336   | 106220711 | 1.630763769 | up   |
| MACS_PEAK_550  | 27  | 4.57  | 281000809Rik  | 32062   | 106220711 | 1.630763769 | up   |
| MACS_PEAK_551  | 55  | 25.45 | Sec11l1       | 170309  | 3630537   | 1.908110738 | up   |
| MACS_PEAK_567  | 47  | 22.42 | Rhob          | 113472  | 1500309   | 1.795479774 | up   |
| MACS_PEAK_593  | 31  | 16.36 | Tct15         | 54951   | 106770341 | 1.531815052 | up   |
| MACS_PEAK_603  | 20  | 8.48  | Snx13         | 142816  | 102340142 | 1.833219647 | down |
| MACS_PEAK_638  | 21  | 7.88  | Dact1         | 319209  | 1500050   | 2.195098639 | down |
| MACS_PEAK_638  | 21  | 7.88  | Dact1         | 319209  | 100630088 | 2.167698622 | down |
| MACS_PEAK_649  | 25  | 6.66  | Fut8          | 850585  | 2340056   | 2.135364532 | down |
| MACS_PEAK_649  | 25  | 6.66  | Fut8          | 850585  | 1340068   | 1.797354579 | down |
| MACS_PEAK_750  | 26  | 11.51 | Foxf2         | 94237   | 1240091   | 2.093223333 | up   |
| MACS_PEAK_751  | 96  | 48.19 | Foxf2         | 139740  | 1240091   | 2.093223333 | up   |
| MACS_PEAK_752  | 48  | 19.95 | Foxf2         | 150135  | 1240091   | 2.093223333 | up   |
| MACS_PEAK_766  | 75  | 37.56 | Wrnip1        | 96580   | 5890725   | 4.550052166 | down |
| MACS_PEAK_768  | 22  | 5.98  | Tubb2b        | 18536   | 1230500   | 9.238461494 | down |
| MACS_PEAK_783  | 17  | 6.66  | Rif1b2        | 124078  | 3140537   | 1.947802186 | down |
| MACS_PEAK_797  | 32  | 12.12 | Barr1         | 56811   | 7050075   | 5.78196907  | down |
| MACS_PEAK_813  | 17  | 7.76  | Tgfb1         | 90954   | 2060446   | 2.340261459 | down |
| MACS_PEAK_814  | 24  | 9.6   | Zcchc6        | 276849  | 102450717 | 2.124472618 | up   |
| MACS_PEAK_815  | 27  | 7.84  | Dapk1         | 264368  | 101940079 | 1.667805314 | up   |
| MACS_PEAK_816  | 21  | 10.3  | Dapk1         | 200652  | 101940079 | 1.667805314 | up   |
| MACS_PEAK_825  | 19  | 8.24  | Fancc         | 107316  | 2060022   | 1.544645429 | up   |
| MACS_PEAK_826  | 20  | 7.27  | Fancc         | 125315  | 2060022   | 1.544645429 | up   |
| MACS_PEAK_827  | 22  | 4.69  | 0610007P08Rik | 172070  | 105720600 | 1.747234583 | down |
| MACS_PEAK_827  | 22  | 4.69  | 0610007P08Rik | 172070  | 106840121 | 1.564627409 | down |
| MACS_PEAK_847  | 24  | 9.69  | Tmem161b      | 480312  | 6590673   | 1.719977498 | up   |
| MACS_PEAK_848  | 20  | 9.69  | Tmem161b      | 349255  | 6590673   | 1.719977498 | up   |
| MACS_PEAK_849  | 22  | 9.69  | Rasa1         | 615817  | 104590722 | 1.986502409 | down |
| MACS_PEAK_850  | 22  | 10.91 | Hapln1        | 564349  | 580398    | 6.735909462 | down |
| MACS_PEAK_851  | 23  | 9.69  | Edil3         | 514966  | 101940605 | 1.737264156 | down |
| MACS_PEAK_852  | 20  | 7.88  | Edil3         | 573509  | 101940605 | 1.737264156 | down |
| MACS_PEAK_853  | 27  | 9.69  | Edil3         | 699930  | 101940605 | 1.737264156 | down |
| MACS_PEAK_854  | 28  | 12.72 | Hapln1        | 128723  | 580398    | 6.735909462 | down |
| MACS_PEAK_863  | 21  | 7.24  | Atg10         | 146993  | 2470066   | 2.110445023 | down |
| MACS_PEAK_864  | 21  | 7.27  | Atg10         | 207709  | 2470066   | 2.110445023 | down |
| MACS_PEAK_883  | 59  | 20.03 | Pik3r1        | 703296  | 4730671   | 2.600860834 | down |
| MACS_PEAK_884  | 29  | 13.93 | Pik3r1        | 528553  | 4730671   | 2.600860834 | down |
| MACS_PEAK_885  | 21  | 9.69  | Pik3r1        | 476465  | 4730671   | 2.600860834 | down |
| MACS_PEAK_886  | 30  | 7.88  | Slc30a5       | 594774  | 2970403   | 3.024980068 | down |
| MACS_PEAK_886  | 30  | 7.88  | Slc30a5       | 594774  | 2630288   | 2.769304037 | down |
| MACS_PEAK_887  | 23  | 10.3  | Slc30a5       | 661496  | 2970403   | 3.024980068 | down |
| MACS_PEAK_887  | 23  | 10.3  | Slc30a5       | 661496  | 2630288   | 2.769304037 | down |
| MACS_PEAK_928  | 33  | 15.15 | Adk           | 410029  | 380338    | 3.20015502  | down |
| MACS_PEAK_929  | 44  | 15.24 | Adk           | 423551  | 380338    | 3.20015502  | down |
| MACS_PEAK_933  | 18  | 7.27  | Kcnma1        | 625375  | 100110338 | 2.169965598 | up   |
| MACS_PEAK_937  | 31  | 9.91  | Rps24         | 508743  | 102690538 | 1.870081425 | down |
| MACS_PEAK_938  | 26  | 9.69  | Rps24         | 679395  | 102690538 | 1.870081425 | down |
| MACS_PEAK_939  | 18  | 9.09  | Rps24         | 816602  | 102690538 | 1.870081425 | down |
| MACS_PEAK_940  | 19  | 7.2   | Rps24         | 827770  | 102690538 | 1.870081425 | down |
| MACS_PEAK_941  | 32  | 15.75 | Rps24         | 881371  | 102690538 | 1.870081425 | down |
| MACS_PEAK_949  | 20  | 9.09  | Ccdc66        | 301597  | 5220270   | 1.524603486 | down |
| MACS_PEAK_960  | 28  | 7.88  | Bmp4          | 333370  | 100520100 | 1.95533061  | down |
| MACS_PEAK_961  | 36  | 17.57 | Gch1          | 137123  | 670364    | 1.952455997 | up   |
| MACS_PEAK_972  | 17  | 6.66  | Nfatc4        | 28318   | 2470735   | 1.957414746 | up   |
| MACS_PEAK_977  | 36  | 14.8  | Xpo4          | 37078   | 3840551   | 2.114598036 | down |
| MACS_PEAK_980  | 35  | 15.38 | Dleu7         | 418280  | 2320402   | 1.752730727 | down |
| MACS_PEAK_993  | 17  | 7.88  | Bmp1          | 48910   | 380594    | 1.86990571  | up   |
| MACS_PEAK_993  | 17  | 7.88  | Bmp1          | 48910   | 2940576   | 1.60881567  | up   |
| MACS_PEAK_1010 | 45  | 18.29 | 1300010F03Rik | 257933  | 4570253   | 1.801385999 | up   |
| MACS_PEAK_1011 | 18  | 9.69  | 1300010F03Rik | 286103  | 4570253   | 1.801385999 | up   |
| MACS_PEAK_1013 | 48  | 15.75 | Sugt1         | 72873   | 1690670   | 2.028542902 | up   |
| MACS_PEAK_1015 | 24  | 9.14  | Uct1          | 41696   | 2640528   | 1.574525823 | down |
| MACS_PEAK_1028 | 42  | 21.2  | Commd6        | 146195  | 105390717 | 1.578427196 | down |
| MACS_PEAK_1034 | 48  | 26.05 | Dct           | 1110518 | 1090347   | 1.577306986 | down |
| MACS_PEAK_1034 | 48  | 26.05 | Dct           | 1110518 | 3840494   | 1.660903931 | down |
| MACS_PEAK_1035 | 17  | 7.88  | Dct           | 1087133 | 1090347   | 1.577306986 | down |
| MACS_PEAK_1035 | 17  | 7.88  | Dct           | 1087133 | 3840494   | 1.660903931 | down |
| MACS_PEAK_1036 | 31  | 15.75 | Dct           | 1015957 | 1090347   | 1.577306986 | down |
| MACS_PEAK_1036 | 31  | 15.75 | Dct           | 1015957 | 3840494   | 1.660903931 | down |
| MACS_PEAK_1039 | 25  | 7.88  | Mbnl2         | 128403  | 3450707   | 1.756134391 | down |
| MACS_PEAK_1040 | 25  | 11.51 | Mbnl2         | 126588  | 3450707   | 1.756134391 | down |
| MACS_PEAK_1044 | 128 | 67.25 | Mbnl2         | 107761  | 3450707   | 1.756134391 | down |
| MACS_PEAK_1045 | 19  | 8.48  | Mbnl2         | 112849  | 3450707   | 1.756134391 | down |
| MACS_PEAK_1083 | 28  | 10.91 | Mtdh          | 129965  | 2510541   | 1.778023362 | down |
| MACS_PEAK_1084 | 21  | 9.69  | Ywhaz         | 173506  | 1230717   | 2.80567503  | up   |
| MACS_PEAK_1088 | 44  | 21.81 | Ywhaz         | 126997  | 1230717   | 2.80567503  | up   |
| MACS_PEAK_1095 | 19  | 6.66  | Trps1         | 224075  | 870100    | 2.253350019 | down |
| MACS_PEAK_1096 | 35  | 9.98  | Trps1         | 193354  | 870100    | 2.253350019 | down |
| MACS_PEAK_1097 | 64  | 29.69 | Trps1         | 612591  | 870100    | 2.253350019 | down |
| MACS_PEAK_1098 | 15  | 6.66  | Trps1         | 614923  | 870100    | 2.253350019 | down |
| MACS_PEAK_1099 | 38  | 10.63 | Trps1         | 778427  | 870100    | 2.253350019 | down |
| MACS_PEAK_1100 | 27  | 11.51 | Utp23         | 78619   | 60711     | 1.532169223 | down |
| MACS_PEAK_1102 | 48  | 22.42 | Mrlp13        | 187083  | 2850551   | 1.606062293 | up   |
| MACS_PEAK_1103 | 25  | 10.06 | Col14a1       | 149666  | 1570398   | 2.242420435 | down |
| MACS_PEAK_1104 | 23  | 7.76  | Col14a1       | 172043  | 1570398   | 2.242420435 | down |
| MACS_PEAK_1114 | 35  | 14.54 | E430025E21Rik | 14354   | 3060017   | 1.801285028 | up   |
| MACS_PEAK_1118 | 23  | 7.76  | Myc           | 800879  | 380541    | 1.514363527 | down |

|                |     |       |            |         |           |             |      |
|----------------|-----|-------|------------|---------|-----------|-------------|------|
| MACS_PEAK_1140 | 25  | 10.91 | Tnrc6b     | 31600   | 101190041 | 1.602386117 | up   |
| MACS_PEAK_1168 | 41  | 14.54 | Pfkm       | 65833   | 5720168   | 4.260520458 | down |
| MACS_PEAK_1169 | 25  | 8.31  | Pfkm       | 64957   | 5720168   | 4.260520458 | down |
| MACS_PEAK_1170 | 18  | 7.27  | Pfkm       | 61505   | 5720168   | 4.260520458 | down |
| MACS_PEAK_1171 | 20  | 9.42  | Lmbr1l     | 10658   | 2190403   | 1.618604183 | up   |
| MACS_PEAK_1175 | 22  | 10.3  | Grasp      | 41354   | 3940450   | 1.931490898 | down |
| MACS_PEAK_1208 | 227 | 7.15  | Tbx1       | 73353   | 6590121   | 2.809188366 | up   |
| MACS_PEAK_1209 | 44  | 13.93 | Tbx1       | 53697   | 6590121   | 2.809188366 | up   |
| MACS_PEAK_1222 | 26  | 9.09  | Opal1      | 314602  | 3520390   | 1.51439774  | down |
| MACS_PEAK_1222 | 26  | 9.09  | Opal1      | 314602  | 4730537   | 1.844746113 | down |
| MACS_PEAK_1222 | 26  | 9.09  | Opal1      | 314602  | 2030433   | 1.719260216 | down |
| MACS_PEAK_1226 | 26  | 12.72 | Lrrc33     | 34011   | 2510184   | 3.905851841 | up   |
| MACS_PEAK_1238 | 30  | 9.98  | Dtx3l      | 42696   | 1050168   | 1.838681459 | up   |
| MACS_PEAK_1239 | 27  | 8.64  | Fst1l      | 92104   | 100070746 | 30.46147919 | down |
| MACS_PEAK_1240 | 14  | 7.88  | Ndufb4     | 77942   | 5690594   | 2.297720194 | up   |
| MACS_PEAK_1243 | 34  | 7.84  | BC027231   | 108522  | 6840609   | 1.573701859 | down |
| MACS_PEAK_1261 | 35  | 14.54 | Robo2      | 601834  | 450136    | 1.660531163 | up   |
| MACS_PEAK_1261 | 35  | 14.54 | Robo2      | 601834  | 100770373 | 1.523898602 | up   |
| MACS_PEAK_1269 | 31  | 14.54 | Atp5j      | 206032  | 6900288   | 1.566173673 | up   |
| MACS_PEAK_1270 | 41  | 14.54 | Atp5j      | 210919  | 6900288   | 1.566173673 | up   |
| MACS_PEAK_1271 | 28  | 13.93 | Atp5j      | 292849  | 6900288   | 1.566173673 | up   |
| MACS_PEAK_1276 | 18  | 7.27  | Ifnar2     | 76195   | 7100484   | 1.98504493  | down |
| MACS_PEAK_1288 | 25  | 9.09  | Pfig       | 101700  | 5890440   | 1.88964709  | down |
| MACS_PEAK_1296 | 175 | 60.34 | Erg        | 173620  | 1770739   | 1.973852038 | down |
| MACS_PEAK_1306 | 34  | 12.75 | Snv9       | 123961  | 3290592   | 1.786275148 | down |
| MACS_PEAK_1322 | 30  | 9.85  | Thbs2      | 273668  | 2850136   | 1.530437708 | down |
| MACS_PEAK_1332 | 28  | 11.84 | Sox8       | 6810    | 580026    | 1.502229095 | down |
| MACS_PEAK_1333 | 21  | 10.91 | Sox8       | 38330   | 580026    | 1.502229095 | down |
| MACS_PEAK_1334 | 47  | 18.29 | Sox8       | 64859   | 580026    | 1.502229095 | down |
| MACS_PEAK_1344 | 26  | 13.93 | Notch4     | 22585   | 6370707   | 1.774282813 | up   |
| MACS_PEAK_1354 | 26  | 12.72 | Aars2      | 29720   | 102450609 | 1.886784554 | up   |
| MACS_PEAK_1355 | 31  | 7.03  | Hsp90ab1   | 11295   | 5390102   | 3.361030817 | down |
| MACS_PEAK_1355 | 31  | 7.03  | Hsp90ab1   | 11295   | 6040093   | 5.004231453 | down |
| MACS_PEAK_1360 | 47  | 21.2  | Foxp4      | 60972   | 6290022   | 1.508641601 | up   |
| MACS_PEAK_1362 | 92  | 38.1  | Foxp4      | 125431  | 6290022   | 1.508641601 | up   |
| MACS_PEAK_1368 | 22  | 9.69  | Kat2b      | 23051   | 6550451   | 1.971818686 | down |
| MACS_PEAK_1368 | 22  | 9.69  | Kat2b      | 23051   | 2570369   | 1.707039448 | down |
| MACS_PEAK_1377 | 24  | 12.72 | Ppp4r1     | 39514   | 5670088   | 2.129496774 | down |
| MACS_PEAK_1387 | 24  | 7.27  | Tgfr1      | 212864  | 2640541   | 1.82399416  | down |
| MACS_PEAK_1387 | 24  | 7.27  | Tgfr1      | 212864  | 2850403   | 3.366029501 | down |
| MACS_PEAK_1391 | 49  | 18.18 | Tgfr1      | 110178  | 2640541   | 1.82399416  | down |
| MACS_PEAK_1391 | 49  | 18.18 | Tgfr1      | 110178  | 2850403   | 3.366029501 | down |
| MACS_PEAK_1397 | 34  | 10.91 | Galnt14    | 101163  | 3990278   | 1.679883838 | up   |
| MACS_PEAK_1401 | 27  | 12.12 | Fez2       | 188584  | 5910181   | 1.603789568 | down |
| MACS_PEAK_1432 | 26  | 9.09  | Fzd8       | 1222458 | 1990053   | 1.892960548 | down |
| MACS_PEAK_1433 | 25  | 8.48  | Fzd8       | 885858  | 1990053   | 1.892960548 | down |
| MACS_PEAK_1434 | 33  | 17.57 | Fzd8       | 884747  | 1990053   | 1.892960548 | down |
| MACS_PEAK_1440 | 53  | 8.91  | Rock1      | 147212  | 130044    | 3.036412716 | down |
| MACS_PEAK_1446 | 40  | 15.47 | RioK3      | 102506  | 7040026   | 2.018571138 | down |
| MACS_PEAK_1496 | 22  | 7.88  | Prdm6      | 31069   | 101230070 | 2.116293669 | down |
| MACS_PEAK_1501 | 25  | 7.11  | Gramd3     | 1285174 | 6650546   | 3.307068825 | down |
| MACS_PEAK_1502 | 48  | 6.66  | Gramd3     | 936850  | 6650546   | 3.307068825 | down |
| MACS_PEAK_1503 | 56  | 24.74 | Gramd3     | 808360  | 6650546   | 3.307068825 | down |
| MACS_PEAK_1513 | 18  | 9.69  | Fbn2       | 234552  | 103830487 | 1.77337563  | up   |
| MACS_PEAK_1514 | 35  | 15.75 | Fbn2       | 224237  | 103830487 | 1.77337563  | up   |
| MACS_PEAK_1516 | 76  | 39.99 | Fbn2       | 177156  | 103830487 | 1.77337563  | up   |
| MACS_PEAK_1518 | 32  | 12.75 | Ndst1      | 64899   | 102060286 | 1.803198338 | up   |
| MACS_PEAK_1519 | 40  | 11.55 | Synpo      | 45424   | 102680377 | 1.866822839 | down |
| MACS_PEAK_1519 | 40  | 11.55 | Synpo      | 45424   | 104760168 | 1.684028506 | down |
| MACS_PEAK_1520 | 53  | 19.39 | Synpo      | 46377   | 102680377 | 1.866822839 | down |
| MACS_PEAK_1520 | 53  | 19.39 | Synpo      | 46377   | 104760168 | 1.684028506 | down |
| MACS_PEAK_1521 | 27  | 8.73  | Tcof1      | 56779   | 101340575 | 1.891676545 | up   |
| MACS_PEAK_1526 | 103 | 43.46 | Txnl1      | 198627  | 101400593 | 1.59683907  | up   |
| MACS_PEAK_1527 | 19  | 6.06  | Txnl1      | 178685  | 101400593 | 1.59683907  | up   |
| MACS_PEAK_1528 | 24  | 10.3  | Nedd4l     | 202619  | 6380368   | 1.516248822 | down |
| MACS_PEAK_1529 | 34  | 8.87  | Nedd4l     | 117533  | 6380368   | 1.516248822 | down |
| MACS_PEAK_1533 | 39  | 20.6  | Malt1      | 89686   | 4670292   | 1.50060451  | up   |
| MACS_PEAK_1534 | 29  | 9.69  | Malt1      | 92651   | 4670292   | 1.50060451  | up   |
| MACS_PEAK_1535 | 23  | 9.09  | Malt1      | 99581   | 4670292   | 1.50060451  | up   |
| MACS_PEAK_1559 | 35  | 8.24  | Nfatc1     | 159221  | 2320348   | 2.426151514 | down |
| MACS_PEAK_1559 | 35  | 8.24  | Nfatc1     | 159221  | 6180161   | 1.97121489  | down |
| MACS_PEAK_1559 | 35  | 8.24  | Nfatc1     | 159221  | 510400    | 3.104269505 | down |
| MACS_PEAK_1559 | 35  | 8.24  | Nfatc1     | 159221  | 6290136   | 1.625146389 | down |
| MACS_PEAK_1560 | 42  | 9.14  | Nfatc1     | 119935  | 2320348   | 2.426151514 | down |
| MACS_PEAK_1560 | 42  | 9.14  | Nfatc1     | 119935  | 6180161   | 1.97121489  | down |
| MACS_PEAK_1560 | 42  | 9.14  | Nfatc1     | 119935  | 510400    | 3.104269505 | down |
| MACS_PEAK_1560 | 42  | 9.14  | Nfatc1     | 119935  | 6290136   | 1.625146389 | down |
| MACS_PEAK_1564 | 29  | 13.93 | Atp9b      | 223742  | 3710494   | 2.144056559 | up   |
| MACS_PEAK_1580 | 44  | 9.09  | Psat1      | 776138  | 670446    | 2.637450457 | down |
| MACS_PEAK_1595 | 47  | 21.81 | Trpm3      | 159452  | 6400731   | 1.53155458  | down |
| MACS_PEAK_1607 | 25  | 11.51 | Minpp1     | 69857   | 5860736   | 2.846674681 | down |
| MACS_PEAK_1607 | 25  | 11.51 | Minpp1     | 69857   | 870301    | 7.255403996 | down |
| MACS_PEAK_1607 | 25  | 11.51 | Minpp1     | 69857   | 6110112   | 1.528426886 | down |
| MACS_PEAK_1608 | 68  | 29.69 | Minpp1     | 116242  | 5860736   | 2.846674681 | down |
| MACS_PEAK_1608 | 68  | 29.69 | Minpp1     | 116242  | 870301    | 7.255403996 | down |
| MACS_PEAK_1608 | 68  | 29.69 | Minpp1     | 116242  | 6110112   | 1.528426886 | down |
| MACS_PEAK_1609 | 59  | 20.32 | Minpp1     | 120712  | 5860736   | 2.846674681 | down |
| MACS_PEAK_1609 | 59  | 20.32 | Minpp1     | 120712  | 870301    | 7.255403996 | down |
| MACS_PEAK_1609 | 59  | 20.32 | Minpp1     | 120712  | 6110112   | 1.528426886 | down |
| MACS_PEAK_1610 | 35  | 11.51 | Minpp1     | 129181  | 5860736   | 2.846674681 | down |
| MACS_PEAK_1610 | 35  | 11.51 | Minpp1     | 129181  | 870301    | 7.255403996 | down |
| MACS_PEAK_1610 | 35  | 11.51 | Minpp1     | 129181  | 6110112   | 1.528426886 | down |
| MACS_PEAK_1655 | 65  | 26.05 | Camk1d     | 335342  | 101230692 | 1.549100399 | up   |
| MACS_PEAK_1659 | 31  | 11.29 | Gata3      | 2763121 | 6130068   | 1.555937174 | down |
| MACS_PEAK_1679 | 48  | 12.19 | Egfr7      | 47691   | 670170    | 1.795167565 | up   |
| MACS_PEAK_1680 | 29  | 11.25 | Egfr7      | 45257   | 670170    | 1.795167565 | up   |
| MACS_PEAK_1681 | 28  | 10.91 | Egfr7      | 40051   | 670170    | 1.795167565 | up   |
| MACS_PEAK_1694 | 20  | 7.4   | Stfgalnac6 | 14356   | 1230315   | 1.544875264 | down |
| MACS_PEAK_1700 | 25  | 12.12 | Pbx3       | 455307  | 3710577   | 2.450549364 | down |
| MACS_PEAK_1701 | 28  | 13.33 | Pbx3       | 429747  | 3710577   | 2.450549364 | down |
| MACS_PEAK_1704 | 24  | 9.69  | Ggta1      | 52791   | 1570292   | 1.871118188 | up   |
| MACS_PEAK_1705 | 51  | 19.95 | Ggta1      | 196274  | 1570292   | 1.871118188 | up   |
| MACS_PEAK_1706 | 27  | 9.34  | Ggta1      | 241273  | 1570292   | 1.871118188 | up   |
| MACS_PEAK_1717 | 25  | 7.88  | Stam2      | 118946  | 2120377   | 1.636899948 | down |
| MACS_PEAK_1718 | 19  | 5.78  | Stam2      | 222475  | 2120377   | 1.636899948 | down |
| MACS_PEAK_1730 | 19  | 8.48  | Rbms1      | 178150  | 6400014   | 1.956834078 | down |
| MACS_PEAK_1742 | 30  | 7.88  | Sp3        | 455854  | 104210341 | 2.323744059 | down |
| MACS_PEAK_1753 | 20  | 13.93 | Ube2e3     | 337903  | 101980025 | 2.235800743 | up   |
| MACS_PEAK_1760 | 61  | 10.57 | Ispan18    | 117664  | 940435    | 2.772142649 | down |
| MACS_PEAK_1762 | 44  | 19.95 | Ispan18    | 99243   | 940435    | 2.772142649 | down |
| MACS_PEAK_1763 | 42  | 21.2  | Cat        | 80037   | 4280152   | 1.666490912 | up   |
| MACS_PEAK_1768 | 24  | 11.08 | Cat        | 101456  | 4280152   | 1.666490912 | up   |
| MACS_PEAK_1787 | 26  | 10.91 | Spred1     | 145639  | 6940706   | 2.010764599 | down |
| MACS_PEAK_1789 | 22  | 10.91 | Thbs1      | 555435  | 430288    | 5.464723587 | down |
| MACS_PEAK_1789 | 22  | 10.91 | Thbs1      | 555435  | 4560494   | 5.315876007 | down |
| MACS_PEAK_1790 | 20  | 8.48  | Thbs1      | 553488  | 430288    | 5.464723587 | down |
| MACS_PEAK_1790 | 20  | 8.48  | Thbs1      | 553488  | 4560494   | 5.315876007 | down |
| MACS_PEAK_1791 | 30  | 13.93 | Thbs1      | 491918  | 430288    | 5.464723587 | down |
| MACS_PEAK_1791 | 30  | 13.93 | Thbs1      | 491918  | 4560494   | 5.315876007 | down |
| MACS_PEAK_1792 | 60  | 28.47 | Thbs1      | 432442  | 430288    | 5.464723587 | down |
| MACS_PEAK_1792 | 60  | 28.47 | Thbs1      | 432442  | 4560494   | 5.315876007 | down |
| MACS_PEAK_1793 | 24  | 8.7   | Thbs1      | 387701  | 430288    | 5.464723587 | down |



|                |     |       |               |         |           |              |      |
|----------------|-----|-------|---------------|---------|-----------|--------------|------|
| MACS_Peak_1793 | 24  | 8.7   | Thbs1         | 387701  | 4560494   | 5.315876007  | down |
| MACS_Peak_1809 | 26  | 5.46  | Anapc1        | 21991   | 100610463 | 1.925601721  | up   |
| MACS_Peak_1810 | 39  | 12.19 | Anapc1        | 26452   | 100610463 | 1.925601721  | up   |
| MACS_Peak_1813 | 23  | 6.66  | 4930402H24Rik | 20826   | 1190164   | 1.547660351  | up   |
| MACS_Peak_1829 | 36  | 15.75 | Tasp1         | 291427  | 520403    | 1.752894998  | down |
| MACS_Peak_1830 | 21  | 8.87  | Tasp1         | 262601  | 520403    | 1.752894998  | down |
| MACS_Peak_1850 | 23  | 7.88  | Bcl2l1        | 46037   | 1580452   | 1.568951726  | down |
| MACS_Peak_1850 | 23  | 7.88  | Bcl2l1        | 46037   | 5420484   | 1.546880739  | down |
| MACS_Peak_1859 | 47  | 19.99 | 2900097C17Rik | 14202   | 101580368 | 2.592229843  | down |
| MACS_Peak_1860 | 28  | 14.54 | 2900097C17Rik | 47323   | 101580368 | 2.592229843  | down |
| MACS_Peak_1873 | 47  | 16.41 | Tomm34        | 36945   | 5690102   | 1.965200901  | down |
| MACS_Peak_1896 | 22  | 9.09  | Npep1         | 90223   | 103870315 | 1.71185455   | up   |
| MACS_Peak_1923 | 53  | 23.83 | Pde7a         | 114807  | 2190041   | 4.084401608  | down |
| MACS_Peak_1923 | 53  | 23.83 | Pde7a         | 114807  | 1690746   | 2.622594118  | down |
| MACS_Peak_1931 | 87  | 27.26 | Fndc3b        | 116411  | 1050687   | 2.314380884  | down |
| MACS_Peak_1932 | 31  | 13.93 | Fndc3b        | 102788  | 1050687   | 2.314380884  | down |
| MACS_Peak_1933 | 33  | 10.91 | Fndc3b        | 96976   | 1050687   | 2.314380884  | down |
| MACS_Peak_1963 | 27  | 11.51 | Pcdh10        | 3371421 | 3190204   | 1.756918907  | up   |
| MACS_Peak_1963 | 27  | 11.51 | Pcdh10        | 3371421 | 940014    | 1.62713182   | up   |
| MACS_Peak_1964 | 22  | 8.48  | Pcdh10        | 3312848 | 3190204   | 1.756918907  | up   |
| MACS_Peak_1964 | 22  | 8.48  | Pcdh10        | 3312848 | 940014    | 1.62713182   | up   |
| MACS_Peak_1973 | 40  | 15.94 | Cog6          | 496720  | 3370601   | 1.77967155   | down |
| MACS_Peak_1982 | 23  | 9.09  | Nbs1          | 771884  | 106630717 | 1.603463292  | down |
| MACS_Peak_1990 | 17  | 9.69  | P2ry1         | 341034  | 6040121   | 2.169948816  | down |
| MACS_Peak_1993 | 53  | 22.42 | Dhx36         | 112530  | 2470465   | 1.817358971  | down |
| MACS_Peak_1994 | 18  | 6.06  | Dhx36         | 109212  | 2470465   | 1.817358971  | down |
| MACS_Peak_2003 | 21  | 9.69  | Ppm1l         | 180946  | 102570082 | 1.582718134  | up   |
| MACS_Peak_2020 | 26  | 7.62  | Arhgef2       | 25731   | 3360577   | 1.610099435  | down |
| MACS_Peak_2021 | 33  | 15.75 | Clk2          | 12503   | 510079    | 2.464841843  | down |
| MACS_Peak_2027 | 27  | 10.79 | Anp32e        | 43881   | 6510706   | 2.025931835  | down |
| MACS_Peak_2035 | 23  | 7.88  | Sec22b        | 33079   | 3190278   | 1.934768319  | down |
| MACS_Peak_2036 | 47  | 4.88  | Sec22b        | 40722   | 3190278   | 1.934768319  | down |
| MACS_Peak_2039 | 52  | 7.21  | Hmgcs2        | 36872   | 770725    | 1.805868745  | down |
| MACS_Peak_2043 | 23  | 8.48  | Tbx15         | 412700  | 4610411   | 2.563603878  | down |
| MACS_Peak_2048 | 17  | 8.48  | Trim33        | 85008   | 2230280   | 3.103994131  | down |
| MACS_Peak_2048 | 17  | 8.48  | Trim33        | 85008   | 580619    | 3.768191814  | down |
| MACS_Peak_2055 | 71  | 34.53 | Csf1          | 112349  | 3120469   | 1.510466751  | up   |
| MACS_Peak_2089 | 20  | 7.88  | Left1         | 243264  | 7100288   | 1.737193108  | down |
| MACS_Peak_2091 | 18  | 8.48  | Hadh          | 126400  | 3830465   | 5.792607307  | down |
| MACS_Peak_2116 | 21  | 6.66  | Znh16         | 72789   | 6510458   | 1.624250531  | down |
| MACS_Peak_2117 | 39  | 5.63  | Ddah1         | 108038  | 6400750   | 2.672152281  | down |
| MACS_Peak_2118 | 47  | 9.04  | Ddah1         | 54958   | 6400750   | 2.672152281  | down |
| MACS_Peak_2119 | 27  | 12.72 | Cyr61         | 129560  | 5290026   | 3.337931395  | down |
| MACS_Peak_2123 | 28  | 10.91 | Fubp1         | 17869   | 5390373   | 2.243709564  | down |
| MACS_Peak_2134 | 43  | 18.78 | Tox           | 987670  | 3440053   | 4.584356308  | down |
| MACS_Peak_2135 | 24  | 7.88  | Tox           | 1105272 | 3440053   | 4.584356308  | down |
| MACS_Peak_2137 | 23  | 10.81 | Chd7          | 84998   | 3870372   | 1.861780882  | down |
| MACS_Peak_2178 | 39  | 19.72 | Zfp618        | 302113  | 3290369   | 1.567986131  | up   |
| MACS_Peak_2179 | 33  | 10.3  | Zfp618        | 291283  | 3290369   | 1.567986131  | up   |
| MACS_Peak_2180 | 29  | 9.14  | Col27a1       | 28892   | 100130541 | 2.459280014  | down |
| MACS_Peak_2180 | 29  | 9.14  | Col27a1       | 28892   | 1740390   | 4.319157124  | down |
| MACS_Peak_2189 | 18  | 8.37  | Ptprd         | 1279714 | 3120097   | 1.835583448  | up   |
| MACS_Peak_2190 | 23  | 7.88  | Ptprd         | 3924561 | 3120097   | 1.835583448  | up   |
| MACS_Peak_2195 | 50  | 11.18 | Mpdz          | 840795  | 4050577   | 1.670507431  | down |
| MACS_Peak_2195 | 50  | 11.18 | Mpdz          | 840795  | 1990064   | 2.104254484  | down |
| MACS_Peak_2200 | 48  | 21.2  | Psp1          | 345310  | 5050594   | 5.23514986   | down |
| MACS_Peak_2215 | 26  | 11.08 | Dmrta1        | 218065  | 3190333   | 2.103105068  | down |
| MACS_Peak_2222 | 97  | 31.04 | Hook1         | 219600  | 2480500   | 2.538444281  | down |
| MACS_Peak_2235 | 18  | 6.66  | Ror1          | 259929  | 6220026   | 1.958731174  | down |
| MACS_Peak_2273 | 49  | 19.72 | Trim62        | 43768   | 4760451   | 2.022188902  | up   |
| MACS_Peak_2284 | 20  | 6.66  | Clic4         | 125866  | 3290368   | 3.674860239  | down |
| MACS_Peak_2284 | 20  | 6.66  | Clic4         | 125866  | 6450181   | 4.74880743   | down |
| MACS_Peak_2285 | 28  | 13.75 | Clic4         | 106057  | 3290368   | 3.674860239  | down |
| MACS_Peak_2285 | 28  | 13.75 | Clic4         | 106057  | 6450181   | 4.74880743   | down |
| MACS_Peak_2286 | 30  | 8.96  | Srrm1         | 54840   | 6110025   | 1.615817308  | up   |
| MACS_Peak_2287 | 32  | 11.84 | A330049H08Rik | 47923   | 430112    | 2.046452045  | down |
| MACS_Peak_2305 | 50  | 22.72 | Ube2b         | 18519   | 3610154   | 1.58241725   | up   |
| MACS_Peak_2313 | 18  | 7.11  | Erf1          | 35068   | 3450273   | 1.543256164  | down |
| MACS_Peak_2317 | 29  | 9.65  | Gpr153        | 47085   | 4120332   | 1.725471854  | up   |
| MACS_Peak_2347 | 15  | 7.27  | Srp2          | 55834   | 6380341   | 2.011079073  | down |
| MACS_Peak_2361 | 21  | 7.76  | Hs3t1         | 1443193 | 1850193   | 1.553391099  | down |
| MACS_Peak_2362 | 28  | 10.65 | Ldb2          | 450535  | 5670441   | 2.367152691  | down |
| MACS_Peak_2368 | 21  | 9.09  | Gpr125        | 981447  | 6380025   | 2.239007235  | down |
| MACS_Peak_2369 | 25  | 10.3  | Gpr125        | 1353556 | 6380025   | 2.239007235  | down |
| MACS_Peak_2370 | 34  | 13.85 | Tbc1d19       | 226075  | 4050170   | 1.680420637  | up   |
| MACS_Peak_2388 | 34  | 7.03  | Sgcb          | 29088   | 6370711   | 1.52116406   | down |
| MACS_Peak_2396 | 40  | 17.57 | Fip1l1        | 62236   | 6510333   | 1.568021417  | down |
| MACS_Peak_2397 | 32  | 15.15 | Fip1l1        | 23468   | 6510333   | 1.568021417  | down |
| MACS_Peak_2398 | 28  | 9.09  | Chic2         | 202833  | 101980039 | 1.743302584  | down |
| MACS_Peak_2412 | 15  | 8.48  | Art3          | 39733   | 2760348   | 1.571328759  | down |
| MACS_Peak_2418 | 29  | 12.12 | Nfox1         | 428063  | 6040731   | 2.532574054  | up   |
| MACS_Peak_2421 | 27  | 12.12 | Nfox1         | 25400   | 2480070   | 1.5617863975 | down |
| MACS_Peak_2425 | 16  | 16.07 | Lrrc8d        | 113825  | 1780014   | 1.506517887  | down |
| MACS_Peak_2443 | 29  | 8.27  | Ung           | 41975   | 6100364   | 2.298276901  | down |
| MACS_Peak_2447 | 33  | 11.38 | Hspb8         | 148252  | 540563    | 1.629815936  | up   |
| MACS_Peak_2468 | 27  | 9.09  | Gbas          | 37063   | 6760278   | 1.902266145  | down |
| MACS_Peak_2469 | 18  | 6.66  | Tyw1          | 366444  | 106650348 | 2.425904274  | up   |
| MACS_Peak_2496 | 17  | 8.48  | Uncx          | 110842  | 2060142   | 1.693639398  | down |
| MACS_Peak_2509 | 19  | 10.91 | Hmgb1         | 95754   | 102640685 | 2.085407734  | up   |
| MACS_Peak_2511 | 18  | 7.88  | Alox5ap       | 79352   | 3170440   | 2.468556643  | up   |
| MACS_Peak_2520 | 18  | 6.66  | Peg10         | 69939   | 104210161 | 1.547018647  | down |
| MACS_Peak_2521 | 49  | 17.18 | Peg10         | 212107  | 104210161 | 1.547018647  | down |
| MACS_Peak_2527 | 35  | 12.72 | Tac1          | 470491  | 7000195   | 1.699343801  | down |
| MACS_Peak_2531 | 34  | 19.99 | Glicc1        | 185717  | 3290070   | 2.098738909  | down |
| MACS_Peak_2537 | 33  | 11.64 | Pikna4        | 326715  | 102450484 | 4.854547024  | up   |
| MACS_Peak_2561 | 31  | 8.94  | Cald1         | 165741  | 104730707 | 1.581065974  | down |
| MACS_Peak_2561 | 31  | 8.94  | Cald1         | 165741  | 1770129   | 1.575563431  | down |
| MACS_Peak_2566 | 33  | 10.79 | Ptn           | 253256  | 5910161   | 1.975698113  | down |
| MACS_Peak_2567 | 35  | 16.96 | Ptn           | 286563  | 5910161   | 1.975698113  | down |
| MACS_Peak_2574 | 160 | 3.58  | Tbxas1        | 36076   | 5050053   | 6.862919331  | up   |
| MACS_Peak_2574 | 160 | 3.58  | Tbxas1        | 36076   | 6900286   | 1.623475432  | up   |
| MACS_Peak_2575 | 92  | 14.63 | Ezh2          | 54628   | 6130605   | 3.118177891  | down |
| MACS_Peak_2588 | 119 | 22.99 | Fkbp14        | 38579   | 6510601   | 2.260330915  | down |
| MACS_Peak_2599 | 74  | 12.07 | Tgolin1       | 105132  | 4920433   | 2.579447985  | down |
| MACS_Peak_2599 | 74  | 12.07 | Tgolin1       | 105132  | 3060270   | 1.883389592  | down |
| MACS_Peak_2610 | 22  | 9.95  | Npm3-ps1      | 200049  | 3610300   | 2.108114243  | down |
| MACS_Peak_2613 | 28  | 10.6  | Nfu1          | 31269   | 5700047   | 1.652709723  | up   |
| MACS_Peak_2633 | 46  | 11.81 | Pdzrn3        | 401962  | 2340131   | 1.666963577  | up   |
| MACS_Peak_2634 | 29  | 12.12 | Pdzrn3        | 400305  | 2340131   | 1.666963577  | up   |
| MACS_Peak_2641 | 72  | 29.97 | Sumt1         | 78510   | 730050    | 1.816872358  | up   |
| MACS_Peak_2657 | 20  | 7.88  | Wink1         | 34654   | 3170603   | 1.862841845  | down |
| MACS_Peak_2662 | 37  | 14.41 | Cd9           | 61445   | 4730041   | 2.94108367   | down |
| MACS_Peak_2663 | 18  | 6.66  | Vwf           | 85448   | 4670519   | 3.012349367  | up   |
| MACS_Peak_2664 | 51  | 9.38  | Vwf           | 84635   | 4670519   | 3.012349367  | up   |
| MACS_Peak_2677 | 21  | 7.27  | Eps8          | 215135  | 7050204   | 2.723695993  | down |
| MACS_Peak_2678 | 15  | 6.66  | Eps8          | 177724  | 7050204   | 2.723695993  | down |
| MACS_Peak_2682 | 35  | 14.54 | Mgst1         | 36155   | 6020605   | 2.017282248  | down |
| MACS_Peak_2684 | 39  | 18.78 | Aebp2         | 509949  | 106550154 | 1.500701666  | down |
| MACS_Peak_2688 | 67  | 15.15 | Sox5          | 830709  | 3190128   | 3.311142206  | down |
| MACS_Peak_2688 | 67  | 15.15 | Sox5          | 830709  | 2370576   | 4.999372005  | down |
| MACS_Peak_2688 | 67  | 15.15 | Sox5          | 830709  | 2900167   | 8.529214859  | down |
| MACS_Peak_2689 | 65  | 26.05 | Sox5          | 709819  | 3190128   | 3.311142206  | down |

|                |     |       |               |         |           |             |      |
|----------------|-----|-------|---------------|---------|-----------|-------------|------|
| MACS_PEAK_2689 | 65  | 26.05 | Sox5          | 709819  | 2370576   | 4.999372005 | down |
| MACS_PEAK_2689 | 65  | 26.05 | Sox5          | 709819  | 2900167   | 8.529214859 | down |
| MACS_PEAK_2690 | 45  | 10.3  | Sox5          | 678769  | 3190128   | 3.311142206 | down |
| MACS_PEAK_2690 | 45  | 10.3  | Sox5          | 678769  | 2370576   | 4.999372005 | down |
| MACS_PEAK_2690 | 45  | 10.3  | Sox5          | 678769  | 2900167   | 8.529214859 | down |
| MACS_PEAK_2691 | 77  | 38.77 | Sox5          | 650875  | 3190128   | 3.311142206 | down |
| MACS_PEAK_2691 | 77  | 38.77 | Sox5          | 650875  | 2370576   | 4.999372005 | down |
| MACS_PEAK_2691 | 77  | 38.77 | Sox5          | 650875  | 2900167   | 8.529214859 | down |
| MACS_PEAK_2702 | 24  | 9.69  | Sox5          | 710245  | 3190128   | 3.311142206 | down |
| MACS_PEAK_2702 | 24  | 9.69  | Sox5          | 710245  | 2370576   | 4.999372005 | down |
| MACS_PEAK_2702 | 24  | 9.69  | Sox5          | 710245  | 2900167   | 8.529214859 | down |
| MACS_PEAK_2703 | 148 | 59.09 | Sox5          | 729447  | 3190128   | 3.311142206 | down |
| MACS_PEAK_2703 | 148 | 59.09 | Sox5          | 729447  | 2370576   | 4.999372005 | down |
| MACS_PEAK_2703 | 148 | 59.09 | Sox5          | 729447  | 2900167   | 8.529214859 | down |
| MACS_PEAK_2704 | 32  | 14.54 | Sox5          | 735585  | 3190128   | 3.311142206 | down |
| MACS_PEAK_2704 | 32  | 14.54 | Sox5          | 735585  | 2370576   | 4.999372005 | down |
| MACS_PEAK_2704 | 32  | 14.54 | Sox5          | 735585  | 2900167   | 8.529214859 | down |
| MACS_PEAK_2705 | 26  | 7.5   | Sox5          | 752240  | 3190128   | 3.311142206 | down |
| MACS_PEAK_2705 | 26  | 7.5   | Sox5          | 752240  | 2370576   | 4.999372005 | down |
| MACS_PEAK_2705 | 26  | 7.5   | Sox5          | 752240  | 2900167   | 8.529214859 | down |
| MACS_PEAK_2709 | 25  | 9.09  | 4933424801Rik | 177710  | 4902239   | 4.310250759 | down |
| MACS_PEAK_2712 | 21  | 6.66  | Pih1h         | 163996  | 5290739   | 1.747664928 | down |
| MACS_PEAK_2724 | 31  | 12.12 | Sirra         | 14231   | 2570100   | 8.081143379 | down |
| MACS_PEAK_2724 | 31  | 12.12 | Sirra         | 14291   | 4150121   | 8.390077591 | down |
| MACS_PEAK_2734 | 66  | 36.35 | C80913        | 329164  | 2360458   | 1.696633697 | down |
| MACS_PEAK_2761 | 29  | 7.84  | Chd2          | 149558  | 102120066 | 1.902526021 | down |
| MACS_PEAK_2764 | 36  | 13.73 | St8sia2       | 299911  | 2680082   | 1.841214657 | up   |
| MACS_PEAK_2765 | 32  | 9.19  | St8sia2       | 332916  | 2680082   | 1.841214657 | up   |
| MACS_PEAK_2766 | 19  | 6.06  | Akap13        | 158613  | 101450594 | 1.573993444 | up   |
| MACS_PEAK_2787 | 22  | 9.69  | Picalm        | 70061   | 1940280   | 1.597013712 | up   |
| MACS_PEAK_2788 | 39  | 18.78 | Dlg2          | 1460362 | 107050452 | 1.835449576 | up   |
| MACS_PEAK_2798 | 36  | 9.35  | Spcc5         | 35455   | 360301    | 1.929940462 | up   |
| MACS_PEAK_2803 | 22  | 8.48  | P2ry6         | 40582   | 5290400   | 6.581582546 | up   |
| MACS_PEAK_2804 | 16  | 7.62  | Stard10       | 28737   | 4570170   | 1.654127836 | down |
| MACS_PEAK_2812 | 21  | 9.69  | Usp47         | 288128  | 105900047 | 1.575356126 | down |
| MACS_PEAK_2818 | 108 | 46.04 | Sox6          | 1003628 | 6840717   | 3.285536766 | down |
| MACS_PEAK_2818 | 108 | 46.04 | Sox6          | 1003628 | 4070601   | 1.792667627 | down |
| MACS_PEAK_2839 | 39  | 4.74  | Lat           | 7885    | 3170025   | 1.69903791  | up   |
| MACS_PEAK_2893 | 58  | 15.75 | Plekha2       | 92937   | 2850091   | 2.480962276 | up   |
| MACS_PEAK_2899 | 29  | 11.51 | 6430573F11Rik | 205930  | 7000347   | 1.823604465 | down |
| MACS_PEAK_2900 | 45  | 14.81 | 6430573F11Rik | 65894   | 7000347   | 1.823604465 | down |
| MACS_PEAK_2901 | 35  | 16.96 | 6430573F11Rik | 92051   | 7000347   | 1.823604465 | down |
| MACS_PEAK_2902 | 25  | 13.33 | A730069N07Rik | 34933   | 100360010 | 2.787984133 | up   |
| MACS_PEAK_2905 | 17  | 6.06  | Fgl1          | 41584   | 2350358   | 1.56188643  | up   |
| MACS_PEAK_2937 | 23  | 7.88  | Ints10        | 87944   | 2120609   | 1.54038012  | up   |
| MACS_PEAK_2938 | 21  | 6.65  | Ints10        | 66171   | 2120609   | 1.54038012  | up   |
| MACS_PEAK_2946 | 47  | 21.81 | Ednra         | 277426  | 106550204 | 2.295722961 | up   |
| MACS_PEAK_2947 | 29  | 11.25 | Sic10a7       | 233269  | 7320438   | 1.822488002 | down |
| MACS_PEAK_2959 | 23  | 10.91 | Nfx           | 45787   | 2450152   | 1.575346112 | down |
| MACS_PEAK_2960 | 150 | 76.05 | Lyl1          | 36952   | 2900242   | 2.016277552 | up   |
| MACS_PEAK_2961 | 26  | 7.5   | Lyl1          | 42764   | 2900242   | 2.016277552 | up   |
| MACS_PEAK_2989 | 43  | 13.33 | Nob1          | 33262   | 5700184   | 1.675647736 | down |
| MACS_PEAK_2990 | 52  | 12.75 | Nob1          | 40530   | 5700184   | 1.675647736 | down |
| MACS_PEAK_2991 | 70  | 25.45 | Nob1          | 44121   | 5700184   | 1.675647736 | down |
| MACS_PEAK_2992 | 27  | 9.69  | Nob1          | 47921   | 5700184   | 1.675647736 | down |
| MACS_PEAK_2993 | 37  | 12.19 | Nob1          | 53996   | 5700184   | 1.675647736 | down |
| MACS_PEAK_2999 | 65  | 30.9  | Zfhx3         | 686846  | 7040465   | 1.900578856 | up   |
| MACS_PEAK_3004 | 27  | 12.72 | Adamts18      | 150236  | 104070017 | 1.659858108 | down |
| MACS_PEAK_3010 | 22  | 6.6   | Irf8          | 32740   | 610161    | 3.621077776 | up   |
| MACS_PEAK_3042 | 19  | 8.48  | Fat3          | 1494738 | 105670446 | 2.421111107 | up   |
| MACS_PEAK_3048 | 33  | 12.19 | Bbs9          | 586852  | 4540368   | 1.631353974 | down |
| MACS_PEAK_3049 | 23  | 6.66  | Bbs9          | 758713  | 4540368   | 1.631353974 | down |
| MACS_PEAK_3060 | 68  | 36.35 | Kirrel3       | 1627971 | 2630195   | 1.939929843 | up   |
| MACS_PEAK_3063 | 41  | 13.33 | Cdon          | 120742  | 104810102 | 1.829356194 | down |
| MACS_PEAK_3066 | 19  | 6.66  | Cdon          | 56293   | 104810102 | 1.829356194 | down |
| MACS_PEAK_3085 | 26  | 7.76  | Ncam1         | 351304  | 105690114 | 1.675677061 | up   |
| MACS_PEAK_3090 | 64  | 8.94  | Scamp5        | 47594   | 6290021   | 1.89307731  | up   |
| MACS_PEAK_3096 | 23  | 8.42  | Adpgk         | 133183  | 4200164   | 1.868386626 | down |
| MACS_PEAK_3109 | 20  | 10.3  | Tle3          | 517662  | 105270110 | 1.855359912 | up   |
| MACS_PEAK_3110 | 32  | 12.72 | Tle3          | 531334  | 105270110 | 1.855359912 | up   |
| MACS_PEAK_3121 | 23  | 7.88  | Snx1          | 46185   | 3190670   | 1.925142765 | up   |
| MACS_PEAK_3135 | 25  | 11.51 | Gnb5          | 67394   | 6550722   | 2.050322056 | down |
| MACS_PEAK_3145 | 31  | 13.33 | Cd109         | 843966  | 130014    | 1.82360971  | down |
| MACS_PEAK_3145 | 31  | 13.33 | Cd109         | 843966  | 540152    | 1.708335042 | down |
| MACS_PEAK_3151 | 26  | 10.91 | Tmed3         | 84178   | 6946005   | 2.500232935 | down |
| MACS_PEAK_3153 | 37  | 16.36 | Tbc1d2b       | 760316  | 107100039 | 1.949914932 | up   |
| MACS_PEAK_3159 | 123 | 55.74 | Spsb4         | 94605   | 4070673   | 1.836065888 | down |
| MACS_PEAK_3160 | 23  | 10.3  | Acp2          | 72895   | 1690736   | 1.52359724  | down |
| MACS_PEAK_3160 | 23  | 10.3  | Acp2          | 72895   | 6200364   | 2.482869387 | down |
| MACS_PEAK_3173 | 88  | 44.83 | Rpl29         | 44979   | 1240075   | 2.101823807 | down |
| MACS_PEAK_3175 | 33  | 13.6  | Gnb2          | 22568   | 102700047 | 1.68414557  | up   |
| MACS_PEAK_3176 | 46  | 11.08 | Rbm6          | 101634  | 6020446   | 2.389750576 | down |
| MACS_PEAK_3176 | 46  | 11.08 | Rbm6          | 101634  | 3840563   | 2.153254986 | down |
| MACS_PEAK_3176 | 46  | 11.08 | Rbm6          | 101634  | 4780129   | 3.783868313 | down |
| MACS_PEAK_3181 | 24  | 6.58  | Scap          | 51433   | 3800706   | 1.572818518 | up   |
| MACS_PEAK_3189 | 38  | 21.81 | Tgfb2         | 632533  | 6550398   | 2.211287975 | down |
| MACS_PEAK_3190 | 22  | 8.48  | Tgfb2         | 889025  | 6550398   | 2.211287975 | down |
| MACS_PEAK_3223 | 53  | 12.19 | Usp9j         | 171677  | 3120338   | 1.864694238 | down |
| MACS_PEAK_3235 | 41  | 16.36 | Fam122b       | 103058  | 770050    | 1.527989864 | down |
| MACS_PEAK_3241 | 29  | 11.51 | Yipf6         | 82610   | 1850338   | 1.743624806 | up   |
| MACS_PEAK_3243 | 23  | 10.3  | Cox7b         | 60310   | 2340504   | 1.761149645 | down |
| MACS_PEAK_3253 | 18  | 7.88  | A830080D01Rik | 294385  | 101780402 | 1.836452127 | down |
| MACS_PEAK_3254 | 21  | 12.72 | A830080D01Rik | 307784  | 101780402 | 1.836452127 | down |
| MACS_PEAK_1    | 22  | 9.09  | Pcmd1         | 30601   | 1450603   | 1.791262388 | down |
| MACS_PEAK_5    | 53  | 23.63 | Eya1          | 101809  | 101580487 | 1.914695263 | down |
| MACS_PEAK_5    | 53  | 23.63 | Eya1          | 101809  | 1450278   | 3.289761305 | down |
| MACS_PEAK_5    | 53  | 23.63 | Eya1          | 101809  | 5220390   | 4.272898674 | down |
| MACS_PEAK_13   | 54  | 18.78 | Col9a1        | 18482   | 105860463 | 4.804460526 | down |
| MACS_PEAK_14   | 32  | 11.51 | Col9a1        | 44317   | 105860463 | 4.804460526 | down |
| MACS_PEAK_15   | 28  | 14.54 | Col9a1        | 53031   | 105860463 | 4.804460526 | down |
| MACS_PEAK_33   | 24  | 12.12 | 1500015010Rik | 114444  | 3130368   | 1.779098392 | down |
| MACS_PEAK_34   | 20  | 10.3  | 1500015010Rik | 15528   | 3130368   | 1.779098392 | down |
| MACS_PEAK_35   | 43  | 13.21 | Gulp1         | 33615   | 5570446   | 5.826993942 | down |
| MACS_PEAK_36   | 90  | 48.47 | Gulp1         | 169599  | 5570446   | 5.826993942 | down |
| MACS_PEAK_38   | 18  | 5.45  | Col5a2        | 389     | 104670129 | 2.087709427 | up   |
| MACS_PEAK_41   | 23  | 9.09  | Myo1b         | 93906   | 101410168 | 1.891579628 | down |
| MACS_PEAK_41   | 23  | 9.09  | Myo1b         | 93906   | 105910021 | 2.122879982 | down |
| MACS_PEAK_62   | 19  | 9.05  | Nrp2          | 390588  | 6650446   | 1.683444738 | down |
| MACS_PEAK_63   | 25  | 10.3  | Nrp2          | 14830   | 6650446   | 1.683444738 | down |
| MACS_PEAK_82   | 44  | 16.96 | Sic4a3        | 35828   | 360603    | 1.932770133 | up   |
| MACS_PEAK_86   | 38  | 9.58  | Epha4         | 109908  | 460750    | 1.665304303 | up   |
| MACS_PEAK_94   | 21  | 6.66  | Plehd         | 360     | 3390014   | 2.121124744 | down |
| MACS_PEAK_96   | 21  | 8.48  | 3110079015Rik | 27822   | 7100292   | 4.763119698 | down |
| MACS_PEAK_118  | 26  | 6.65  | Gli2          | 27359   | 3060632   | 1.640829682 | down |
| MACS_PEAK_144  | 20  | 7.27  | Prg4          | 68771   | 5860156   | 1.597024322 | down |
| MACS_PEAK_145  | 20  | 9.69  | Hmcn1         | 43257   | 104570670 | 3.694500208 | down |
| MACS_PEAK_152  | 38  | 11.18 | Ncf2          | 14870   | 2650133   | 7.074065685 | up   |
| MACS_PEAK_158  | 18  | 9.51  | Fam20b        | 22290   | 2030215   | 1.650509834 | down |
| MACS_PEAK_159  | 22  | 9.42  | Angpt1        | 30500   | 104920372 | 2.244338512 | down |
| MACS_PEAK_160  | 28  | 9.14  | Angpt1        | 252     | 104920372 | 2.244338512 | down |
| MACS_PEAK_163  | 32  | 14.54 | Prdx6         | 22461   | 6380601   | 1.883167624 | up   |
| MACS_PEAK_170  | 79  | 12.03 | Dnm3os        | 90636   | 102940671 | 2.063773394 | down |

|                |     |       |               |        |           |             |      |
|----------------|-----|-------|---------------|--------|-----------|-------------|------|
| MACS_PEAK_171  | 28  | 5.45  | Dnm3os        | 29737  | 102940671 | 2.063773394 | down |
| MACS_PEAK_172  | 24  | 7.88  | Dnm3os        | 46     | 102940671 | 2.063773394 | down |
| MACS_PEAK_188  | 53  | 16.71 | Zfp238        | 1464   | 5050537   | 2.892208099 | down |
| MACS_PEAK_190  | 18  | 7.88  | Klf26b        | 204050 | 1940288   | 1.922086239 | down |
| MACS_PEAK_191  | 99  | 34.4  | Klf26b        | 292121 | 1940288   | 1.922086239 | down |
| MACS_PEAK_192  | 20  | 7.88  | Klf26b        | 490685 | 1940288   | 1.922086239 | down |
| MACS_PEAK_205  | 18  | 7.88  | Lyp1a1        | 266598 | 5290717   | 2.084865047 | down |
| MACS_PEAK_211  | 25  | 7.82  | Smyd2         | 72520  | 5050026   | 2.534350405 | down |
| MACS_PEAK_222  | 30  | 14.54 | Utrn          | 307400 | 3390048   | 3.522297144 | down |
| MACS_PEAK_247  | 45  | 10.89 | Rev3l         | 59317  | 1090717   | 1.678638935 | down |
| MACS_PEAK_248  | 24  | 7.88  | Gtf3c6        | 890    | 360546    | 1.66050005  | up   |
| MACS_PEAK_278  | 25  | 6.66  | Slc35f1       | 13814  | 3850164   | 2.190327406 | down |
| MACS_PEAK_282  | 49  | 21.2  | Ccdc109a      | 50375  | 106520647 | 4.056745529 | down |
| MACS_PEAK_334  | 19  | 6.1   | Dcn           | 165735 | 510332    | 3.202011585 | down |
| MACS_PEAK_335  | 20  | 7.27  | Lum           | 1022   | 5420079   | 2.972158909 | down |
| MACS_PEAK_337  | 17  | 5.45  | Atp2b1        | 210481 | 104150181 | 1.961512804 | down |
| MACS_PEAK_338  | 17  | 7.88  | Dusp6         | 19445  | 7100070   | 1.744878888 | down |
| MACS_PEAK_339  | 19  | 9.09  | Dusp6         | 2323   | 7100070   | 1.744878888 | down |
| MACS_PEAK_344  | 20  | 7.27  | Phlda1        | 10888  | 2450020   | 2.164865017 | down |
| MACS_PEAK_345  | 37  | 14.07 | Phlda1        | 86708  | 2450020   | 2.164865017 | down |
| MACS_PEAK_348  | 15  | 7.27  | Zfc3h1        | 33866  | 4070706   | 1.60190773  | down |
| MACS_PEAK_349  | 40  | 19.99 | Lgr5          | 68756  | 6020400   | 2.284123944 | down |
| MACS_PEAK_350  | 36  | 12.72 | Tspan8        | 5314   | 1740538   | 1.740787864 | up   |
| MACS_PEAK_355  | 33  | 4.62  | Cpm           | 42508  | 103440025 | 1.511164546 | up   |
| MACS_PEAK_357  | 38  | 19.39 | Slc35e3       | 4700   | 6760707   | 2.735560656 | down |
| MACS_PEAK_358  | 39  | 15.75 | Slc35e3       | 2101   | 6760707   | 2.735560656 | down |
| MACS_PEAK_402  | 25  | 9.14  | Bcl11a        | 227426 | 106380398 | 1.969925761 | up   |
| MACS_PEAK_406  | 18  | 7.27  | Spnb2         | 1363   | 380091    | 2.274885654 | down |
| MACS_PEAK_411  | 29  | 12.72 | Slit3         | 82904  | 106650441 | 2.003383636 | up   |
| MACS_PEAK_413  | 27  | 10.61 | Rars          | 58734  | 380390    | 1.694197536 | down |
| MACS_PEAK_425  | 25  | 9.09  | Gfpt2         | 29344  | 102810242 | 1.50763905  | down |
| MACS_PEAK_426  | 17  | 5.45  | Gfpt2         | 881    | 102810242 | 1.50763905  | down |
| MACS_PEAK_429  | 22  | 5.59  | Col23a1       | 116729 | 2030358   | 1.54298389  | up   |
| MACS_PEAK_432  | 34  | 13.31 | Hspa4         | 194743 | 1050170   | 1.625148892 | up   |
| MACS_PEAK_436  | 31  | 16.36 | Fam114a2      | 84293  | 3610685   | 1.651664257 | up   |
| MACS_PEAK_449  | 63  | 29.08 | 2810001G2ORik | 131680 | 102320292 | 1.537947655 | down |
| MACS_PEAK_450  | 33  | 12.12 | Hs3st3a1      | 113112 | 2230467   | 1.850928664 | down |
| MACS_PEAK_452  | 22  | 7.27  | Elac2         | 145069 | 3440167   | 1.903346419 | down |
| MACS_PEAK_453  | 27  | 8.31  | Elac2         | 79005  | 3440167   | 1.903346419 | down |
| MACS_PEAK_459  | 28  | 13.33 | Efnb3         | 4366   | 5570594   | 1.549831986 | up   |
| MACS_PEAK_479  | 107 | 59.37 | Tbx4          | 20426  | 106370097 | 1.557803273 | up   |
| MACS_PEAK_499  | 49  | 26.05 | Tom1l1        | 294546 | 3190070   | 1.684084654 | down |
| MACS_PEAK_501  | 47  | 18.29 | Mycbpap       | 5078   | 4010022   | 2.147407293 | up   |
| MACS_PEAK_514  | 43  | 12.72 | Adam11        | 12677  | 104560019 | 1.94789505  | up   |
| MACS_PEAK_517  | 15  | 7.88  | Tex2          | 27979  | 3060494   | 1.597836733 | up   |
| MACS_PEAK_519  | 27  | 8.13  | Pitpnc1       | 111853 | 3990017   | 2.315482378 | down |
| MACS_PEAK_520  | 18  | 9.09  | Pitpnc1       | 90266  | 3990017   | 2.315482378 | down |
| MACS_PEAK_521  | 91  | 28.14 | Pitpnc1       | 57227  | 3990017   | 2.315482378 | down |
| MACS_PEAK_547  | 47  | 14.81 | Sphk1         | 3131   | 2470113   | 2.671342373 | down |
| MACS_PEAK_548  | 17  | 7.27  | Sphk1         | 932    | 2470113   | 2.671342373 | down |
| MACS_PEAK_563  | 21  | 9.09  | Aspscr1       | 10156  | 3990399   | 1.595929027 | down |
| MACS_PEAK_567  | 47  | 22.42 | Hs1bp3        | 73080  | 103940735 | 1.757426513 | down |
| MACS_PEAK_567  | 47  | 22.42 | Hs1bp3        | 73080  | 380524    | 2.154220581 | down |
| MACS_PEAK_571  | 26  | 6.06  | Osr1          | 235195 | 1500025   | 1.59414053  | up   |
| MACS_PEAK_571  | 26  | 6.06  | Osr1          | 235195 | 5270706   | 2.1889112   | up   |
| MACS_PEAK_578  | 23  | 9.09  | Tribe2        | 177440 | 4120605   | 1.596457601 | up   |
| MACS_PEAK_579  | 49  | 22.42 | Tribe2        | 85307  | 4120605   | 1.596457601 | up   |
| MACS_PEAK_580  | 27  | 11.51 | Tribe2        | 121219 | 4120605   | 1.596457601 | up   |
| MACS_PEAK_581  | 21  | 9.09  | 1700030C1ORik | 618556 | 103610020 | 2.162940025 | up   |
| MACS_PEAK_594  | 43  | 15.94 | Pxdn          | 96797  | 106760300 | 3.044472218 | down |
| MACS_PEAK_596  | 42  | 19.39 | Prkar2b       | 28128  | 3130593   | 2.270573378 | down |
| MACS_PEAK_596  | 42  | 19.39 | Prkar2b       | 28128  | 5220577   | 1.900593281 | down |
| MACS_PEAK_607  | 29  | 7.27  | Etv1          | 60164  | 70735     | 4.297760963 | down |
| MACS_PEAK_607  | 29  | 7.27  | Etv1          | 60164  | 5080463   | 3.938217402 | down |
| MACS_PEAK_608  | 18  | 7.27  | Etv1          | 145389 | 70735     | 4.297760963 | down |
| MACS_PEAK_608  | 18  | 7.27  | Etv1          | 145389 | 5080463   | 3.938217402 | down |
| MACS_PEAK_618  | 65  | 8.07  | Ewap          | 145455 | 4070575   | 2.126230717 | up   |
| MACS_PEAK_626  | 41  | 13.33 | 1110034A24Rik | 12223  | 6940280   | 1.730407715 | down |
| MACS_PEAK_630  | 23  | 9.89  | Frmf6         | 73149  | 4670019   | 1.692186475 | up   |
| MACS_PEAK_632  | 15  | 8.45  | Actr10        | 29105  | 5860458   | 3.908699751 | down |
| MACS_PEAK_646  | 20  | 9.69  | Syne2         | 44048  | 101980154 | 1.566098332 | up   |
| MACS_PEAK_667  | 23  | 11.53 | Isca2         | 32474  | 3990450   | 2.766831875 | up   |
| MACS_PEAK_669  | 17  | 8.48  | Jdp2          | 54199  | 2360500   | 1.564003229 | down |
| MACS_PEAK_696  | 15  | 7.88  | Evl           | 8417   | 1740113   | 1.865595222 | up   |
| MACS_PEAK_715  | 19  | 8.48  | Zmynd11       | 46828  | 630181    | 1.85174334  | down |
| MACS_PEAK_715  | 19  | 8.48  | Zmynd11       | 46828  | 2570019   | 3.239306688 | down |
| MACS_PEAK_716  | 233 | 8.38  | Zmynd11       | 69027  | 630181    | 1.85174334  | down |
| MACS_PEAK_716  | 233 | 8.38  | Zmynd11       | 69027  | 2570019   | 3.239306688 | down |
| MACS_PEAK_717  | 22  | 10.3  | Gli3          | 351493 | 5690148   | 3.173316717 | down |
| MACS_PEAK_718  | 22  | 8.87  | Gli3          | 165009 | 5690148   | 3.173316717 | down |
| MACS_PEAK_719  | 25  | 10.91 | Gli3          | 96366  | 5690148   | 3.173316717 | down |
| MACS_PEAK_721  | 23  | 9.09  | Rai1          | 30987  | 2680471   | 1.73390785  | down |
| MACS_PEAK_732  | 27  | 7.11  | Hist1h2be     | 427    | 3170168   | 1.672124267 | down |
| MACS_PEAK_741  | 45  | 18.29 | Sox4          | 321263 | 2260091   | 2.331992149 | up   |
| MACS_PEAK_742  | 65  | 26.66 | Sox4          | 262922 | 2260091   | 2.331992149 | up   |
| MACS_PEAK_743  | 21  | 7.76  | Sox4          | 114675 | 2260091   | 2.331992149 | up   |
| MACS_PEAK_744  | 33  | 10.89 | Sox4          | 108906 | 2260091   | 2.331992149 | up   |
| MACS_PEAK_760  | 101 | 36.58 | Gmds          | 158525 | 1050519   | 1.810869336 | down |
| MACS_PEAK_761  | 17  | 7.88  | Gmds          | 77889  | 1050519   | 1.810869336 | down |
| MACS_PEAK_762  | 18  | 9.09  | Gmds          | 42173  | 1050519   | 1.810869336 | down |
| MACS_PEAK_763  | 23  | 6.66  | Gmds          | 88421  | 1050519   | 1.810869336 | down |
| MACS_PEAK_764  | 56  | 29.08 | Gmds          | 154327 | 1050519   | 1.810869336 | down |
| MACS_PEAK_772  | 18  | 6.66  | Cdyl          | 158169 | 4730397   | 2.133082867 | down |
| MACS_PEAK_792  | 27  | 11.68 | Mylip         | 150484 | 50717     | 1.537615657 | up   |
| MACS_PEAK_798  | 44  | 7.58  | C030044811Rik | 48295  | 105890162 | 1.757001281 | down |
| MACS_PEAK_842  | 18  | 6.66  | Mef2c         | 360837 | 780338    | 1.61142087  | down |
| MACS_PEAK_843  | 33  | 15.75 | Mef2c         | 291254 | 780338    | 1.61142087  | down |
| MACS_PEAK_844  | 22  | 8.48  | Mef2c         | 62045  | 780338    | 1.61142087  | down |
| MACS_PEAK_845  | 32  | 10.3  | Mef2c         | 100355 | 780338    | 1.61142087  | down |
| MACS_PEAK_846  | 18  | 6.66  | Mef2c         | 101322 | 780338    | 1.61142087  | down |
| MACS_PEAK_892  | 23  | 9.42  | Erbf2ip       | 36864  | 580253    | 2.336574078 | down |
| MACS_PEAK_917  | 24  | 11.51 | Fam107a       | 4533   | 6180088   | 2.543306351 | down |
| MACS_PEAK_951  | 46  | 12.95 | Gdf10         | 99068  | 4850082   | 2.198053122 | down |
| MACS_PEAK_967  | 28  | 7.27  | Prmt5         | 235    | 4590072   | 4.670490742 | down |
| MACS_PEAK_976  | 37  | 18.78 | Il17d         | 15048  | 5900377   | 1.621251225 | down |
| MACS_PEAK_977  | 36  | 14.8  | Lats2         | 32384  | 6020494   | 1.704494596 | down |
| MACS_PEAK_978  | 28  | 9.98  | Cdadc1        | 37841  | 4120064   | 1.581121564 | down |
| MACS_PEAK_994  | 68  | 32.27 | Fndc3a        | 679522 | 2690097   | 3.297939777 | down |
| MACS_PEAK_996  | 30  | 11.72 | Lrch1         | 95849  | 103120008 | 1.604456425 | down |
| MACS_PEAK_997  | 60  | 28.26 | Lrch1         | 48069  | 103120008 | 1.604456425 | down |
| MACS_PEAK_1008 | 25  | 7.67  | 9030635A04Rik | 160934 | 2350441   | 2.277412415 | down |
| MACS_PEAK_1009 | 20  | 7.82  | 9030625A04Rik | 57052  | 2350441   | 2.277412415 | down |
| MACS_PEAK_1012 | 18  | 8.48  | 1190002H23Rik | 8347   | 4480128   | 2.61289382  | down |
| MACS_PEAK_1023 | 18  | 8.48  | Dach1         | 96132  | 2450593   | 1.550462127 | down |
| MACS_PEAK_1026 | 16  | 8.48  | Kif12         | 211742 | 1660095   | 1.634319186 | up   |
| MACS_PEAK_1057 | 47  | 26.66 | Pcca          | 65652  | 3390400   | 2.243657351 | down |
| MACS_PEAK_1058 | 45  | 20.6  | Pcca          | 180695 | 3390400   | 2.243657351 | down |
| MACS_PEAK_1061 | 28  | 12.72 | Dab2          | 19473  | 103130670 | 1.610951066 | up   |
| MACS_PEAK_1062 | 21  | 9.09  | Dab2          | 16143  | 103130670 | 1.610951066 | up   |
| MACS_PEAK_1078 | 22  | 7.88  | Trio          | 102086 | 102320605 | 1.6330235   | down |
| MACS_PEAK_1078 | 22  | 7.88  | Trio          | 102086 | 103360497 | 1.626712561 | down |
| MACS_PEAK_1091 | 26  | 7.2   | Cthrc1        | 1721   | 103850632 | 7.363954544 | down |

|                |     |       |               |        |           |             |      |
|----------------|-----|-------|---------------|--------|-----------|-------------|------|
| MACS_PEAk_1092 | 33  | 8.53  | Lrp12         | 171230 | 237014    | 2.219601631 | down |
| MACS_PEAk_1093 | 22  | 8.48  | Zfpm2         | 75280  | 460072    | 1.900486469 | down |
| MACS_PEAk_1109 | 33  | 13.93 | Has2          | 47674  | 5360181   | 2.12053895  | down |
| MACS_PEAk_1114 | 35  | 14.54 | Nsmce2        | 14308  | 1770168   | 4.732778072 | down |
| MACS_PEAk_1136 | 26  | 6.65  | Myh9          | 38138  | 4850292   | 1.610285163 | up   |
| MACS_PEAk_1150 | 18  | 8.48  | Klf21a        | 21326  | 2970338   | 2.268258572 | down |
| MACS_PEAk_1152 | 31  | 12.72 | Cntn1         | 28201  | 3800204   | 1.655365348 | down |
| MACS_PEAk_1153 | 28  | 12.72 | Cntn1         | 9086   | 3800204   | 1.655365348 | down |
| MACS_PEAk_1156 | 26  | 10.53 | Prickle1      | 77138  | 103190427 | 3.681575537 | down |
| MACS_PEAk_1157 | 21  | 7.27  | Prickle1      | 58495  | 103190427 | 3.681575537 | down |
| MACS_PEAk_1158 | 26  | 11.51 | Prickle1      | 178568 | 103190427 | 3.681575537 | down |
| MACS_PEAk_1159 | 28  | 13.93 | Prickle1      | 197204 | 103190427 | 3.681575537 | down |
| MACS_PEAk_1165 | 40  | 15.52 | E330033804Rik | 4506   | 101780592 | 1.597389221 | up   |
| MACS_PEAk_1172 | 34  | 16.96 | Prpf40b       | 18928  | 5390706   | 1.827224493 | up   |
| MACS_PEAk_1173 | 48  | 21.2  | Tmbim6        | 27441  | 1770538   | 1.648805022 | up   |
| MACS_PEAk_1176 | 90  | 36.35 | 9430023L20Rik | 6717   | 5670092   | 1.620031238 | up   |
| MACS_PEAk_1181 | 20  | 7.27  | Aaas          | 5391   | 6400528   | 2.296341658 | down |
| MACS_PEAk_1191 | 17  | 9.69  | Glis2         | 4294   | 4810170   | 1.506240129 | down |
| MACS_PEAk_1191 | 17  | 9.69  | Glis2         | 4294   | 4150471   | 1.845925927 | down |
| MACS_PEAk_1192 | 52  | 22.42 | Glis2         | 10949  | 4810170   | 1.506240129 | down |
| MACS_PEAk_1192 | 52  | 22.42 | Glis2         | 10949  | 4150471   | 1.845925927 | down |
| MACS_PEAk_1206 | 28  | 11.51 | Fgd4          | 43375  | 6550338   | 1.711675964 | down |
| MACS_PEAk_1214 | 47  | 18.29 | Etv5          | 66593  | 110017    | 1.707441449 | down |
| MACS_PEAk_1215 | 27  | 11.51 | Etv5          | 10593  | 110017    | 1.707441449 | down |
| MACS_PEAk_1216 | 17  | 6.66  | Etv5          | 69777  | 110017    | 1.707441449 | down |
| MACS_PEAk_1220 | 32  | 15.75 | Il1rap        | 80907  | 3940301   | 1.749590874 | down |
| MACS_PEAk_1225 | 20  | 9.69  | Bdh1          | 1128   | 2850390   | 2.179454565 | down |
| MACS_PEAk_1230 | 52  | 22.72 | Umps          | 84424  | 4730438   | 7.797474861 | down |
| MACS_PEAk_1231 | 21  | 7.88  | Umps          | 158868 | 4730438   | 7.797474861 | down |
| MACS_PEAk_1235 | 25  | 11.51 | Mylk          | 35871  | 7000364   | 1.881766915 | up   |
| MACS_PEAk_1241 | 23  | 12.3  | Igsf11        | 142191 | 60471     | 1.629356027 | down |
| MACS_PEAk_1263 | 108 | 50.29 | Nrip1         | 1008   | 3190039   | 1.901708245 | up   |
| MACS_PEAk_1265 | 31  | 12.12 | Cxadr         | 247955 | 106550400 | 2.025967121 | down |
| MACS_PEAk_1266 | 24  | 11.51 | Cxadr         | 243997 | 106550400 | 2.025967121 | down |
| MACS_PEAk_1276 | 18  | 7.27  | Olig1         | 26819  | 1660594   | 2.554029942 | down |
| MACS_PEAk_1281 | 48  | 17.5  | Runx1         | 66256  | 3840711   | 2.467631817 | down |
| MACS_PEAk_1282 | 51  | 24.14 | Runx1         | 43375  | 3840711   | 2.467631817 | down |
| MACS_PEAk_1283 | 27  | 13.93 | Runx1         | 41891  | 3840711   | 2.467631817 | down |
| MACS_PEAk_1284 | 48  | 14.54 | Runx1         | 217109 | 3840711   | 2.467631817 | down |
| MACS_PEAk_1287 | 36  | 13.3  | Hlcs          | 139480 | 2060537   | 1.634361148 | up   |
| MACS_PEAk_1289 | 24  | 7.62  | Dyrk1a        | 134971 | 102940021 | 1.69041121  | up   |
| MACS_PEAk_1296 | 175 | 60.34 | Ets2          | 1578   | 360451    | 1.974570274 | down |
| MACS_PEAk_1325 | 24  | 9.69  | Rgmb          | 17713  | 4570450   | 1.638943791 | down |
| MACS_PEAk_1326 | 24  | 10.3  | Rgmb          | 4471   | 4570450   | 1.638943791 | down |
| MACS_PEAk_1327 | 22  | 7.11  | Rgmb          | 167458 | 4570450   | 1.638943791 | down |
| MACS_PEAk_1355 | 31  | 7.03  | Sic29a1       | 7837   | 106860154 | 1.97650373  | down |
| MACS_PEAk_1381 | 22  | 8.78  | Ptprm         | 220539 | 6370136   | 1.623142838 | down |
| MACS_PEAk_1382 | 24  | 8.44  | Ptprm         | 39807  | 6370136   | 1.623142838 | down |
| MACS_PEAk_1383 | 46  | 21.08 | Arhgap28      | 96248  | 5890064   | 2.059422255 | down |
| MACS_PEAk_1384 | 19  | 9.69  | Arhgap28      | 29166  | 5890064   | 2.059422255 | down |
| MACS_PEAk_1385 | 23  | 10.79 | Arhgap28      | 107973 | 5890064   | 2.059422255 | down |
| MACS_PEAk_1406 | 34  | 7.28  | Majp4k3       | 72892  | 5390551   | 1.525558496 | down |
| MACS_PEAk_1449 | 21  | 6.66  | Zfp521        | 119485 | 540541    | 2.007312298 | down |
| MACS_PEAk_1450 | 26  | 7.84  | Zfp521        | 29726  | 540541    | 2.007312298 | down |
| MACS_PEAk_1451 | 52  | 24.23 | Zfp521        | 18395  | 540541    | 2.007312298 | down |
| MACS_PEAk_1456 | 25  | 9.66  | Zfp191        | 157    | 3830750   | 2.150001049 | down |
| MACS_PEAk_1477 | 29  | 8.71  | Sema6a        | 199719 | 3060021   | 1.69858098  | down |
| MACS_PEAk_1478 | 40  | 9.05  | Sema6a        | 191881 | 3060021   | 1.69858098  | down |
| MACS_PEAk_1479 | 17  | 6.66  | Sema6a        | 112859 | 3060021   | 1.69858098  | down |
| MACS_PEAk_1480 | 19  | 7.27  | Sema6a        | 60267  | 3060021   | 1.69858098  | down |
| MACS_PEAk_1493 | 20  | 7.88  | Snx2          | 88618  | 2470068   | 5.240269661 | down |
| MACS_PEAk_1494 | 71  | 18.7  | Snx2          | 78797  | 2470068   | 5.240269661 | down |
| MACS_PEAk_1495 | 20  | 7.2   | Ppic          | 69735  | 4570110   | 2.057356834 | down |
| MACS_PEAk_1496 | 22  | 7.88  | Ppic          | 15470  | 4570110   | 2.057356834 | down |
| MACS_PEAk_1507 | 21  | 8.48  | Lmb1          | 22886  | 6020008   | 6.803228855 | down |
| MACS_PEAk_1507 | 21  | 8.48  | Lmb1          | 22886  | 5890292   | 3.909193039 | down |
| MACS_PEAk_1508 | 21  | 6.66  | Lmb1          | 26622  | 6020008   | 6.803228855 | down |
| MACS_PEAk_1508 | 21  | 6.66  | Lmb1          | 26622  | 5890292   | 3.909193039 | down |
| MACS_PEAk_1509 | 56  | 29.69 | Lmb1          | 106432 | 6020008   | 6.803228855 | down |
| MACS_PEAk_1509 | 56  | 29.69 | Lmb1          | 106432 | 5890292   | 3.909193039 | down |
| MACS_PEAk_1538 | 19  | 6.17  | Gnal          | 446    | 5080364   | 2.386161327 | down |
| MACS_PEAk_1567 | 18  | 6.66  | Mbp           | 4738   | 5220369   | 1.633033872 | down |
| MACS_PEAk_1584 | 29  | 12.72 | Cep78         | 65816  | 103830086 | 1.997898817 | down |
| MACS_PEAk_1585 | 51  | 26.66 | Gcnt1         | 113609 | 940129    | 1.885344744 | down |
| MACS_PEAk_1585 | 51  | 26.66 | Gcnt1         | 113609 | 1780215   | 2.185174465 | down |
| MACS_PEAk_1586 | 39  | 17.78 | Gcnt1         | 68101  | 940129    | 1.885344744 | down |
| MACS_PEAk_1586 | 39  | 17.78 | Gcnt1         | 68101  | 1780215   | 2.185174465 | down |
| MACS_PEAk_1593 | 35  | 11.08 | Tmem2         | 3870   | 3290020   | 1.734024167 | down |
| MACS_PEAk_1598 | 60  | 18.18 | Kank1         | 91845  | 3450546   | 5.633127213 | down |
| MACS_PEAk_1603 | 28  | 11.18 | Rct1          | 24507  | 2680008   | 3.034357309 | down |
| MACS_PEAk_1606 | 33  | 11.47 | Sgms1         | 21773  | 4780195   | 1.556291699 | down |
| MACS_PEAk_1607 | 25  | 11.51 | Paps2         | 40089  | 107000132 | 3.08749795  | down |
| MACS_PEAk_1607 | 25  | 11.51 | Paps2         | 40089  | 870113    | 6.537036419 | down |
| MACS_PEAk_1608 | 68  | 29.69 | Paps2         | 6296   | 107000132 | 3.08749795  | down |
| MACS_PEAk_1608 | 68  | 29.69 | Paps2         | 6296   | 870113    | 6.537036419 | down |
| MACS_PEAk_1609 | 59  | 20.32 | Paps2         | 10766  | 107000132 | 3.08749795  | down |
| MACS_PEAk_1609 | 59  | 20.32 | Paps2         | 10766  | 870113    | 6.537036419 | down |
| MACS_PEAk_1610 | 35  | 11.51 | Paps2         | 5055   | 107000132 | 3.08749795  | down |
| MACS_PEAk_1610 | 35  | 11.51 | Paps2         | 5055   | 870113    | 6.537036419 | down |
| MACS_PEAk_1622 | 21  | 6.66  | Nt5c2         | 9231   | 4280735   | 4.751771927 | down |
| MACS_PEAk_1633 | 27  | 12.75 | Adra2a        | 266164 | 104780167 | 2.713639736 | up   |
| MACS_PEAk_1646 | 27  | 10.3  | Sic18a2       | 20214  | 6420541   | 1.563637495 | down |
| MACS_PEAk_1647 | 21  | 6.06  | Pdzd8         | 20778  | 104060162 | 2.089199781 | down |
| MACS_PEAk_1690 | 17  | 6.66  | Nup214        | 11614  | 105900524 | 1.786797881 | up   |
| MACS_PEAk_1704 | 24  | 9.69  | Dab2ip        | 44242  | 6200441   | 1.777291298 | down |
| MACS_PEAk_1705 | 51  | 19.95 | Dab2ip        | 34295  | 6200441   | 1.777291298 | down |
| MACS_PEAk_1706 | 27  | 9.34  | Dab2ip        | 10704  | 6200441   | 1.777291298 | down |
| MACS_PEAk_1714 | 58  | 27.26 | Lrp1b         | 645790 | 102470176 | 1.663841486 | up   |
| MACS_PEAk_1717 | 25  | 7.88  | Fmn12         | 3227   | 4060438   | 2.74194026  | down |
| MACS_PEAk_1717 | 25  | 7.88  | Fmn12         | 3227   | 104050215 | 5.00082922  | down |
| MACS_PEAk_1718 | 19  | 5.78  | Fmn12         | 106756 | 4060438   | 2.74194026  | down |
| MACS_PEAk_1718 | 19  | 5.78  | Fmn12         | 106756 | 104050215 | 5.00082922  | down |
| MACS_PEAk_1719 | 38  | 16.36 | Fmn12         | 119242 | 4060438   | 2.74194026  | down |
| MACS_PEAk_1719 | 38  | 16.36 | Fmn12         | 119242 | 104050215 | 5.00082922  | down |
| MACS_PEAk_1720 | 40  | 15.52 | Fmn12         | 125210 | 4060438   | 2.74194026  | down |
| MACS_PEAk_1720 | 40  | 15.52 | Fmn12         | 125210 | 104050215 | 5.00082922  | down |
| MACS_PEAk_1728 | 40  | 21.2  | Tanc1         | 13091  | 3450180   | 1.740174651 | up   |
| MACS_PEAk_1729 | 20  | 7.27  | Tanc1         | 86532  | 3450180   | 1.740174651 | up   |
| MACS_PEAk_1738 | 18  | 6.66  | Slk39         | 42305  | 50692     | 1.816866875 | down |
| MACS_PEAk_1739 | 14  | 7.27  | Gorasp2       | 13683  | 7040706   | 3.213990211 | down |
| MACS_PEAk_1739 | 14  | 7.27  | Gorasp2       | 13683  | 4060309   | 5.674937225 | down |
| MACS_PEAk_1774 | 45  | 21.81 | Dnajc24       | 34825  | 670095    | 2.561006069 | down |
| MACS_PEAk_1779 | 17  | 7.27  | Bbox1         | 128789 | 2030538   | 1.536293983 | down |
| MACS_PEAk_1780 | 31  | 6.6   | Bbox1         | 94848  | 2030538   | 1.536293983 | down |
| MACS_PEAk_1797 | 26  | 13.93 | Bmf           | 29411  | 102370026 | 2.116255999 | up   |
| MACS_PEAk_1798 | 19  | 9.09  | Fbn1          | 86102  | 3170181   | 1.988004923 | up   |
| MACS_PEAk_1799 | 51  | 16.76 | Fbn1          | 54533  | 3170181   | 1.988004923 | up   |
| MACS_PEAk_1803 | 20  | 7.88  | Gatpb1        | 577    | 730021    | 2.331307411 | down |
| MACS_PEAk_1803 | 20  | 7.88  | Gatpb1        | 577    | 6900037   | 2.433291197 | down |
| MACS_PEAk_1835 | 23  | 8.48  | Rbbp9         | 99     | 2480139   | 2.113550901 | down |
| MACS_PEAk_1861 | 112 | 56.95 | Dlgap4        | 27584  | 5690161   | 1.559213519 | up   |
| MACS_PEAk_1861 | 112 | 56.95 | Dlgap4        | 27584  | 105700670 | 1.550408244 | up   |

|                |    |       |               |         |           |             |      |
|----------------|----|-------|---------------|---------|-----------|-------------|------|
| MACS_PEAk_1874 | 81 | 10.67 | Kcns1         | 28805   | 2570195   | 2.092708826 | down |
| MACS_PEAk_1875 | 71 | 28.45 | Kcns1         | 20445   | 2570195   | 2.092708826 | down |
| MACS_PEAk_1903 | 47 | 23.02 | Col9a3        | 404     | 4050541   | 1.575743914 | down |
| MACS_PEAk_1904 | 35 | 15.75 | Col9a3        | 2631    | 4050541   | 1.575743914 | down |
| MACS_PEAk_1905 | 41 | 12.12 | Col9a3        | 6696    | 4050541   | 1.575743914 | down |
| MACS_PEAk_1906 | 41 | 17.57 | Col9a3        | 13938   | 4050541   | 1.575743914 | down |
| MACS_PEAk_1977 | 21 | 8.96  | Spp20         | 15571   | 3360202   | 1.907341599 | down |
| MACS_PEAk_1984 | 15 | 7.27  | Wnt1          | 12688   | 2570341   | 1.507518649 | down |
| MACS_PEAk_1987 | 41 | 11.12 | Mbn11         | 3236    | 7100048   | 1.567408085 | down |
| MACS_PEAk_1988 | 40 | 18.18 | Mbn11         | 26648   | 7100048   | 1.567408085 | down |
| MACS_PEAk_1995 | 89 | 46.65 | Mme           | 237623  | 6040673   | 1.819696607 | down |
| MACS_PEAk_2001 | 48 | 26.05 | Shox2         | 278757  | 6450059   | 2.458697319 | up   |
| MACS_PEAk_2002 | 19 | 7.24  | Shox2         | 183291  | 6450059   | 2.458697319 | up   |
| MACS_PEAk_2006 | 23 | 12.12 | Rappel2       | 1359623 | 105080278 | 1.643891573 | down |
| MACS_PEAk_2007 | 39 | 16.63 | Rappel2       | 252694  | 105080278 | 1.643891573 | down |
| MACS_PEAk_2021 | 33 | 15.75 | Scamp3        | 177     | 2360707   | 1.615253448 | up   |
| MACS_PEAk_2024 | 25 | 8.87  | Zfp687        | 12466   | 2360672   | 2.247606039 | up   |
| MACS_PEAk_2029 | 17 | 8.48  | Gja5          | 20205   | 1740026   | 1.517576218 | up   |
| MACS_PEAk_2048 | 17 | 8.48  | Bcas2         | 22574   | 2340494   | 1.929402709 | up   |
| MACS_PEAk_2050 | 22 | 7.27  | Ofml3         | 3734    | 7100463   | 1.811375737 | up   |
| MACS_PEAk_2053 | 24 | 9.98  | Cttbpb2nl     | 8010    | 510451    | 1.536500096 | down |
| MACS_PEAk_2054 | 17 | 8.48  | Cttbpb2nl     | 156219  | 510451    | 1.536500096 | down |
| MACS_PEAk_2059 | 67 | 19.05 | Taf13         | 3506    | 100360687 | 1.507123232 | up   |
| MACS_PEAk_2065 | 48 | 16.96 | Ntng1         | 7117    | 1410427   | 1.566899303 | up   |
| MACS_PEAk_2067 | 31 | 15.15 | Col11a1       | 79864   | 2100300   | 3.070882559 | down |
| MACS_PEAk_2067 | 31 | 15.15 | Col11a1       | 79864   | 4810524   | 2.097785955 | down |
| MACS_PEAk_2068 | 97 | 38.45 | Slc35a3       | 344     | 4760066   | 1.659265637 | down |
| MACS_PEAk_2068 | 97 | 38.45 | Slc35a3       | 344     | 100060278 | 1.9222188   | down |
| MACS_PEAk_2070 | 26 | 9.38  | Snx7          | 11655   | 1090446   | 2.196594715 | down |
| MACS_PEAk_2070 | 26 | 9.38  | Snx7          | 11655   | 6980600   | 1.729214668 | down |
| MACS_PEAk_2075 | 42 | 19.99 | Sec24d        | 29368   | 3060279   | 3.02913022  | down |
| MACS_PEAk_2077 | 18 | 9.09  | Camk2d        | 9216    | 2370685   | 1.692703247 | down |
| MACS_PEAk_2078 | 26 | 9.69  | Camk2d        | 59473   | 2370685   | 1.692703247 | down |
| MACS_PEAk_2079 | 23 | 9.69  | Camk2d        | 98645   | 2370685   | 1.692703247 | down |
| MACS_PEAk_2085 | 29 | 10.91 | Elovl6        | 107970  | 103120253 | 1.853826523 | up   |
| MACS_PEAk_2086 | 27 | 11.68 | Col25a1       | 19790   | 4480168   | 1.570342064 | down |
| MACS_PEAk_2086 | 27 | 11.68 | Col25a1       | 19790   | 1580072   | 1.931287408 | down |
| MACS_PEAk_2087 | 36 | 11.38 | Col25a1       | 179816  | 4480168   | 1.570342064 | down |
| MACS_PEAk_2087 | 36 | 11.38 | Col25a1       | 179816  | 1580072   | 1.931287408 | down |
| MACS_PEAk_2098 | 22 | 9.09  | Unc5c         | 44378   | 101090577 | 1.519138575 | down |
| MACS_PEAk_2099 | 35 | 16.39 | Unc5c         | 81900   | 101090577 | 1.519138575 | down |
| MACS_PEAk_2100 | 34 | 9.69  | Unc5c         | 135888  | 101090577 | 1.519138575 | down |
| MACS_PEAk_2101 | 38 | 12.72 | Unc5c         | 156009  | 101090577 | 1.519138575 | down |
| MACS_PEAk_2139 | 14 | 8.48  | Plekhf2       | 920     | 1850075   | 2.222766399 | down |
| MACS_PEAk_2148 | 24 | 7.11  | Bach2         | 119969  | 6760131   | 1.610206008 | down |
| MACS_PEAk_2149 | 54 | 26.05 | Bach2         | 112963  | 6760131   | 1.610206008 | down |
| MACS_PEAk_2150 | 17 | 8.48  | Bach2         | 13802   | 6760131   | 1.610206008 | down |
| MACS_PEAk_2160 | 19 | 10.91 | Sec61b        | 265002  | 4540687   | 1.893554211 | down |
| MACS_PEAk_2169 | 52 | 24.05 | Zfp462        | 308     | 6900100   | 3.295689821 | up   |
| MACS_PEAk_2174 | 22 | 7.27  | Akap2         | 1861    | 102470053 | 5.325752258 | down |
| MACS_PEAk_2183 | 16 | 9.69  | Tle1          | 711731  | 103440167 | 1.573440909 | down |
| MACS_PEAk_2184 | 94 | 8.92  | Tle1          | 399031  | 103440167 | 1.573440909 | down |
| MACS_PEAk_2185 | 29 | 9.09  | Tle1          | 172811  | 103440167 | 1.573440909 | down |
| MACS_PEAk_2218 | 30 | 8.13  | Jun           | 54210   | 840170    | 1.758324981 | up   |
| MACS_PEAk_2219 | 39 | 10.83 | Jun           | 92181   | 840170    | 1.758324981 | up   |
| MACS_PEAk_2220 | 16 | 7.27  | Jun           | 133359  | 840170    | 1.758324981 | up   |
| MACS_PEAk_2242 | 29 | 11.08 | Dab1          | 32085   | 7000605   | 1.782429457 | down |
| MACS_PEAk_2243 | 30 | 9.35  | Ppap2b        | 18124   | 4730280   | 4.089593887 | down |
| MACS_PEAk_2244 | 22 | 7.11  | Ppap2b        | 270580  | 4730280   | 4.089593887 | down |
| MACS_PEAk_2245 | 21 | 7.88  | Ppap2b        | 491797  | 4730280   | 4.089593887 | down |
| MACS_PEAk_2260 | 50 | 13.85 | Ptprf         | 29426   | 1770528   | 1.939987421 | down |
| MACS_PEAk_2262 | 52 | 7.24  | Col9a2        | 522     | 940670    | 3.261986256 | down |
| MACS_PEAk_2263 | 25 | 7.03  | Col9a2        | 1654    | 940670    | 3.261986256 | down |
| MACS_PEAk_2264 | 25 | 10.3  | Ppt1          | 68      | 6450440   | 2.951411963 | down |
| MACS_PEAk_2265 | 44 | 25.45 | Cap1          | 4215    | 2650278   | 1.58444388  | up   |
| MACS_PEAk_2266 | 20 | 7.88  | Cap1          | 5871    | 2650278   | 1.58444388  | up   |
| MACS_PEAk_2268 | 23 | 11.51 | Pou3f1        | 266568  | 3710022   | 2.063205719 | up   |
| MACS_PEAk_2269 | 24 | 7.08  | Pou3f1        | 206286  | 3710022   | 2.063205719 | up   |
| MACS_PEAk_2281 | 24 | 6.66  | Extl1         | 7082    | 2690136   | 3.756691933 | down |
| MACS_PEAk_2309 | 23 | 7.27  | Spsb1         | 60924   | 2850093   | 2.480366468 | down |
| MACS_PEAk_2310 | 21 | 8.48  | Spsb1         | 41018   | 2850093   | 2.480366468 | down |
| MACS_PEAk_2314 | 30 | 8.13  | Vamp3         | 297560  | 7100050   | 2.437590837 | down |
| MACS_PEAk_2317 | 29 | 9.65  | Acot7         | 27433   | 7050053   | 4.576246262 | down |
| MACS_PEAk_2327 | 19 | 6.66  | Akap9         | 61567   | 2060195   | 1.569421291 | up   |
| MACS_PEAk_2333 | 23 | 9.69  | Sema3d        | 29560   | 103060037 | 2.825622559 | down |
| MACS_PEAk_2334 | 21 | 7.88  | Sema3d        | 59279   | 103060037 | 2.825622559 | down |
| MACS_PEAk_2349 | 20 | 5.59  | Dnajb6        | 27368   | 2810309   | 2.975131273 | down |
| MACS_PEAk_2351 | 24 | 8.13  | Maea          | 17595   | 1170392   | 4.912212849 | down |
| MACS_PEAk_2365 | 19 | 6.66  | Lcorl         | 875111  | 730195    | 1.54573679  | up   |
| MACS_PEAk_2372 | 24 | 9.69  | Pcdh7         | 245039  | 103830706 | 1.887373936 | up   |
| MACS_PEAk_2389 | 39 | 10.95 | Rasl1b        | 35998   | 102680427 | 4.432396889 | down |
| MACS_PEAk_2390 | 22 | 8.48  | Rasl1b        | 19654   | 102680427 | 4.432396889 | down |
| MACS_PEAk_2391 | 35 | 15.66 | Rasl1b        | 8909    | 102680427 | 4.432396889 | down |
| MACS_PEAk_2392 | 20 | 4.88  | Rasl1b        | 10387   | 102680427 | 4.432396889 | down |
| MACS_PEAk_2393 | 48 | 15.75 | Rasl1b        | 16069   | 102680427 | 4.432396889 | down |
| MACS_PEAk_2394 | 18 | 7.27  | Rasl1b        | 70945   | 102680427 | 4.432396889 | down |
| MACS_PEAk_2395 | 59 | 21.84 | Rasl1b        | 148124  | 102680427 | 4.432396889 | down |
| MACS_PEAk_2399 | 22 | 9.98  | Chic2         | 33603   | 4540722   | 2.126761436 | down |
| MACS_PEAk_2403 | 25 | 11.51 | Hopx          | 23080   | 103850021 | 2.034017324 | down |
| MACS_PEAk_2430 | 38 | 14.07 | Mtf2          | 122     | 50333     | 1.923413634 | down |
| MACS_PEAk_2442 | 20 | 10.91 | Ssh1          | 15990   | 106650592 | 1.837801218 | up   |
| MACS_PEAk_2455 | 17 | 6.66  | Tbx5          | 32424   | 106840364 | 1.863815188 | down |
| MACS_PEAk_2460 | 24 | 11.14 | Fam101a       | 39196   | 5570040   | 2.988392353 | down |
| MACS_PEAk_2461 | 81 | 38.03 | Fam101a       | 10888   | 5570040   | 2.988392353 | down |
| MACS_PEAk_2470 | 35 | 13.3  | Wbscr17       | 219390  | 2630095   | 2.079356194 | up   |
| MACS_PEAk_2471 | 58 | 11.64 | Wbscr17       | 380446  | 2630095   | 2.079356194 | up   |
| MACS_PEAk_2472 | 31 | 6.66  | Wbscr17       | 403390  | 2630095   | 2.079356194 | up   |
| MACS_PEAk_2473 | 60 | 22.42 | Wbscr17       | 468352  | 2630095   | 2.079356194 | up   |
| MACS_PEAk_2479 | 23 | 10.91 | Gtf2i         | 461     | 106290711 | 3.137578249 | down |
| MACS_PEAk_2483 | 23 | 6.57  | Fzd9          | 13313   | 5360136   | 1.93507576  | down |
| MACS_PEAk_2484 | 25 | 10.3  | Fzd9          | 25545   | 5360136   | 1.93507576  | down |
| MACS_PEAk_2485 | 15 | 8.48  | Por           | 14218   | 6100093   | 1.717088819 | up   |
| MACS_PEAk_2496 | 17 | 8.48  | Mical2        | 81593   | 1050292   | 1.728844047 | up   |
| MACS_PEAk_2502 | 29 | 12.19 | Fscn1         | 6538    | 3450463   | 2.38372784  | up   |
| MACS_PEAk_2505 | 47 | 13.3  | Cdk8          | 29496   | 1050113   | 1.871616602 | down |
| MACS_PEAk_2530 | 31 | 12.12 | Glicl1        | 88205   | 2640082   | 1.538626552 | down |
| MACS_PEAk_2536 | 22 | 7.45  | Foxp2         | 3072    | 4760524   | 1.72091639  | down |
| MACS_PEAk_2536 | 22 | 7.45  | Foxp2         | 3072    | 4150372   | 2.867068768 | down |
| MACS_PEAk_2538 | 23 | 9.09  | Tcfec         | 345929  | 1170722   | 1.795204163 | up   |
| MACS_PEAk_2542 | 25 | 12.12 | A430107013Rik | 40661   | 329075    | 1.644015312 | down |
| MACS_PEAk_2544 | 24 | 8.48  | Ptprz1        | 132862  | 105900121 | 1.908211827 | down |
| MACS_PEAk_2544 | 24 | 8.48  | Ptprz1        | 132862  | 105900121 | 2.008227348 | down |
| MACS_PEAk_2545 | 26 | 10.3  | Ptprz1        | 80998   | 100780411 | 1.908211827 | down |
| MACS_PEAk_2545 | 26 | 10.3  | Ptprz1        | 80998   | 105900121 | 2.008227348 | down |
| MACS_PEAk_2555 | 44 | 15.15 | Mest          | 7357    | 6620292   | 1.687818408 | down |
| MACS_PEAk_2555 | 44 | 15.15 | Mest          | 7357    | 4780440   | 8.560221672 | down |
| MACS_PEAk_2593 | 21 | 7.88  | Grid2         | 195928  | 103190133 | 2.567212582 | up   |
| MACS_PEAk_2605 | 66 | 17.57 | Dok1          | 33185   | 2680112   | 2.928308487 | down |
| MACS_PEAk_2605 | 66 | 17.57 | Dok1          | 33185   | 5220273   | 2.811432123 | down |
| MACS_PEAk_2609 | 45 | 19.95 | Cyp26b1       | 71308   | 2630142   | 2.649281502 | down |
| MACS_PEAk_2617 | 42 | 11.43 | Klf15         | 8737    | 4230164   | 1.65427351  | down |
| MACS_PEAk_2650 | 54 | 18.72 | Vgll4         | 120974  | 6860463   | 1.723965287 | down |

|                |      |       |               |         |           |             |      |
|----------------|------|-------|---------------|---------|-----------|-------------|------|
| MACS_PEAK_2651 | 75   | 33.2  | Vgll4         | 117320  | 6860463   | 1.723965287 | down |
| MACS_PEAK_2652 | 70   | 29.13 | Vgll4         | 38327   | 6860463   | 1.723965287 | down |
| MACS_PEAK_2653 | 29   | 13.93 | Vgll4         | 42066   | 6860463   | 1.723965287 | down |
| MACS_PEAK_2670 | 23   | 7.97  | Lrp6          | 28948   | 5130064   | 1.753937602 | down |
| MACS_PEAK_2706 | 64   | 15.72 | Lrmp          | 17370   | 6290193   | 2.638993025 | up   |
| MACS_PEAK_2721 | 21   | 8.48  | Arhgef1       | 3238    | 100110544 | 1.593886375 | up   |
| MACS_PEAK_2732 | 60   | 17.78 | Cc            | 2080    | 6370161   | 1.936728555 | up   |
| MACS_PEAK_2730 | 36   | 6.1   | Fevh3         | 983     | 2320450   | 1.668603943 | down |
| MACS_PEAK_2732 | 30   | 12.72 | Zfp507        | 287468  | 103840497 | 1.507071495 | up   |
| MACS_PEAK_2738 | 18   | 7.27  | Nosip         | 312     | 6380064   | 1.728900671 | down |
| MACS_PEAK_2744 | 28   | 12.72 | Gas2          | 35267   | 1340082   | 2.430493116 | up   |
| MACS_PEAK_2757 | 20   | 7.27  | Arrdc4        | 307872  | 100870044 | 2.774963856 | up   |
| MACS_PEAK_2758 | 30   | 7.97  | Arrdc4        | 339174  | 100870044 | 2.774963856 | up   |
| MACS_PEAK_2769 | 34   | 11.64 | Acan          | 62978   | 430647    | 3.726875544 | down |
| MACS_PEAK_2769 | 34   | 11.64 | Acan          | 62978   | 4760092   | 6.213802338 | down |
| MACS_PEAK_2770 | 22   | 9.98  | Acan          | 31905   | 430647    | 3.726875544 | down |
| MACS_PEAK_2770 | 22   | 9.98  | Acan          | 31905   | 4760092   | 6.213802338 | down |
| MACS_PEAK_2771 | 57   | 30.29 | Acan          | 26941   | 430647    | 3.726875544 | down |
| MACS_PEAK_2771 | 57   | 30.29 | Acan          | 26941   | 4760092   | 6.213802338 | down |
| MACS_PEAK_2790 | 33   | 8.71  | Fam181b       | 17623   | 3120072   | 1.706959963 | down |
| MACS_PEAK_2800 | 22   | 9.69  | Pih3a         | 2890    | 100630484 | 1.80704093  | down |
| MACS_PEAK_2800 | 22   | 9.69  | Pih3a         | 2890    | 6520037   | 2.543177605 | down |
| MACS_PEAK_2802 | 40   | 14.54 | Plekhh1b      | 2900    | 8704653   | 1.838961244 | down |
| MACS_PEAK_2814 | 39   | 14.96 | Dkk3          | 11356   | 7050128   | 1.85215342  | down |
| MACS_PEAK_2835 | 37   | 8.91  | Igsf6         | 4713    | 5340348   | 1.535048485 | up   |
| MACS_PEAK_2836 | 20   | 6.66  | Tnrc6a        | 25653   | 1240537   | 1.597840071 | up   |
| MACS_PEAK_2846 | 35   | 11.51 | Fgfr2         | 82723   | 5570402   | 4.836047649 | down |
| MACS_PEAK_2846 | 35   | 11.51 | Fgfr2         | 82723   | 100780364 | 1.819450498 | down |
| MACS_PEAK_2846 | 35   | 11.51 | Fgfr2         | 82723   | 4670601   | 1.686376214 | down |
| MACS_PEAK_2854 | 40   | 21.2  | Ptprc         | 5391    | 1660286   | 1.759332657 | up   |
| MACS_PEAK_2881 | 30   | 8.61  | Arglu1        | 513967  | 6510398   | 1.500149727 | up   |
| MACS_PEAK_2883 | 26   | 9.98  | Col4a1        | 146999  | 1740575   | 3.014300823 | up   |
| MACS_PEAK_2887 | 24   | 9.69  | Mcf2l         | 15690   | 1570056   | 2.18674159  | up   |
| MACS_PEAK_2898 | 36   | 16.96 | Ppp1r3b       | 163560  | 6130253   | 2.058467388 | down |
| MACS_PEAK_2900 | 45   | 14.81 | Dlcl1         | 58858   | 1090632   | 4.186814785 | down |
| MACS_PEAK_2901 | 35   | 16.96 | Dlcl1         | 32701   | 1090632   | 4.186814785 | down |
| MACS_PEAK_2912 | 58   | 10.97 | Sorbs2        | 57019   | 6350112   | 1.905857392 | down |
| MACS_PEAK_2913 | 20   | 6.45  | Sorbs2        | 121170  | 6350112   | 1.905857392 | down |
| MACS_PEAK_2920 | 22   | 8.48  | Cdkn2aip      | 29340   | 3060670   | 1.746379733 | up   |
| MACS_PEAK_2930 | 22   | 10.3  | Palid         | 193470  | 102060332 | 2.444493532 | up   |
| MACS_PEAK_2932 | 24   | 6.45  | Cpe           | 17867   | 2940441   | 4.363157749 | down |
| MACS_PEAK_2937 | 23   | 7.88  | Csgalnact1    | 29132   | 5390746   | 1.569012284 | up   |
| MACS_PEAK_2938 | 21   | 6.65  | Csgalnact1    | 7359    | 5390746   | 1.569012284 | up   |
| MACS_PEAK_2941 | 39   | 19.99 | Comp          | 6705    | 3800273   | 1.549821734 | down |
| MACS_PEAK_2947 | 29   | 11.25 | Lsm6          | 78548   | 104050600 | 1.530593514 | up   |
| MACS_PEAK_2963 | 34   | 8.92  | Cbln1         | 122663  | 5670358   | 2.384750605 | up   |
| MACS_PEAK_2969 | 74   | 22.42 | Sall1         | 266519  | 5420020   | 1.546113729 | down |
| MACS_PEAK_2970 | 33   | 10.91 | Sall1         | 588255  | 5420020   | 1.546113729 | down |
| MACS_PEAK_2977 | 58   | 21.2  | Cdh8          | 1455340 | 2100348   | 1.914093852 | up   |
| MACS_PEAK_2986 | 18   | 6.66  | Cdh5          | 314638  | 5340487   | 2.503920078 | up   |
| MACS_PEAK_2989 | 43   | 13.33 | Wwp2          | 21902   | 6550079   | 1.589534521 | down |
| MACS_PEAK_2989 | 43   | 13.33 | Wwp2          | 21902   | 1090102   | 5.120452404 | down |
| MACS_PEAK_2990 | 52   | 12.75 | Wwp2          | 29170   | 6550079   | 1.589534521 | down |
| MACS_PEAK_2990 | 52   | 12.75 | Wwp2          | 29170   | 1090102   | 5.120452404 | down |
| MACS_PEAK_2991 | 70   | 25.45 | Wwp2          | 32761   | 6550079   | 1.589534521 | down |
| MACS_PEAK_2991 | 70   | 25.45 | Wwp2          | 32761   | 1090102   | 5.120452404 | down |
| MACS_PEAK_2992 | 27   | 9.69  | Wwp2          | 36561   | 6550079   | 1.589534521 | down |
| MACS_PEAK_2992 | 27   | 9.69  | Wwp2          | 36561   | 1090102   | 5.120452404 | down |
| MACS_PEAK_2993 | 37   | 12.19 | Wwp2          | 42636   | 6550079   | 1.589534521 | down |
| MACS_PEAK_2993 | 37   | 12.19 | Wwp2          | 42636   | 1090102   | 5.120452404 | down |
| MACS_PEAK_2994 | 36   | 10.91 | Wwp2          | 55153   | 6550079   | 1.589534521 | down |
| MACS_PEAK_2994 | 36   | 10.91 | Wwp2          | 55153   | 1090102   | 5.120452404 | down |
| MACS_PEAK_3010 | 22   | 6.6   | Foxf1a        | 20658   | 6180017   | 1.569296002 | down |
| MACS_PEAK_3025 | 34   | 12.72 | Kcnk1         | 78288   | 1050068   | 1.755455256 | down |
| MACS_PEAK_3031 | 2999 | 2.14  | Igfb1         | 30899   | 5800156   | 1.658383369 | down |
| MACS_PEAK_3039 | 29   | 13.93 | Sesn3         | 83392   | 110687    | 2.475210667 | down |
| MACS_PEAK_3041 | 35   | 16.96 | Fat3          | 150957  | 4670324   | 1.660501838 | up   |
| MACS_PEAK_3045 | 21   | 8.48  | Ifi3          | 13328   | 6520110   | 1.76270628  | down |
| MACS_PEAK_3054 | 43   | 14.54 | Banx2         | 189958  | 4480273   | 1.63368845  | down |
| MACS_PEAK_3054 | 43   | 14.54 | Banx2         | 189958  | 105360403 | 2.952434301 | down |
| MACS_PEAK_3086 | 20   | 10.3  | Ai593442      | 114517  | 6960605   | 2.21384573  | up   |
| MACS_PEAK_3089 | 26   | 11.51 | Cspg4         | 16653   | 2970270   | 1.713827133 | down |
| MACS_PEAK_3093 | 42   | 15.54 | Arid3b        | 2455    | 6650008   | 1.576095343 | up   |
| MACS_PEAK_3096 | 23   | 8.42  | Neo1          | 121948  | 100730537 | 1.652311444 | down |
| MACS_PEAK_3099 | 65   | 26.04 | Thsd4         | 25332   | 6040037   | 2.296028614 | up   |
| MACS_PEAK_3100 | 24   | 9.42  | Thsd4         | 103471  | 6040037   | 2.296028614 | up   |
| MACS_PEAK_3114 | 22   | 8.48  | Irga11        | 64624   | 1740112   | 1.52748549  | down |
| MACS_PEAK_3119 | 26   | 6.57  | Rab11a        | 73032   | 5360079   | 3.261560678 | down |
| MACS_PEAK_3131 | 30   | 6.06  | Tcf12         | 151950  | 3610324   | 1.968023896 | down |
| MACS_PEAK_3137 | 17   | 6.66  | Bmp5          | 6452    | 4670048   | 1.953491926 | down |
| MACS_PEAK_3145 | 31   | 13.33 | Col12a1       | 259166  | 100110731 | 1.992657542 | down |
| MACS_PEAK_3157 | 25   | 12.72 | 1190002N15Rik | 55253   | 4390040   | 4.486139829 | down |
| MACS_PEAK_3165 | 29   | 13.33 | Amotl2        | 36074   | 4730082   | 1.523490906 | down |
| MACS_PEAK_3166 | 68   | 28.47 | Amotl2        | 16618   | 4730082   | 1.523490906 | down |
| MACS_PEAK_3167 | 29   | 11.08 | Amotl2        | 6378    | 4730082   | 1.523490906 | down |
| MACS_PEAK_3176 | 46   | 11.08 | Rbm5          | 183     | 3520402   | 3.3000741   | up   |
| MACS_PEAK_3184 | 22   | 8.48  | Clasp2        | 3302    | 104070121 | 2.483433247 | down |
| MACS_PEAK_3192 | 22   | 6.97  | Irga9         | 36360   | 670180    | 1.867954493 | up   |
| MACS_PEAK_3220 | 26   | 11.51 | Bcor          | 73684   | 3940053   | 1.556888342 | down |
| MACS_PEAK_3221 | 36   | 16.96 | Bcor          | 11012   | 3940053   | 1.556888342 | down |
| MACS_PEAK_3222 | 27   | 10.3  | Atp6ap2       | 177637  | 4010059   | 6.724124908 | down |
| MACS_PEAK_3222 | 27   | 10.3  | Atp6ap2       | 177637  | 7100347   | 6.21543026  | down |
| MACS_PEAK_3244 | 33   | 6.66  | Tlr13         | 49440   | 4810546   | 1.988589168 | up   |
| MACS_PEAK_3249 | 28   | 13.93 | Capn6         | 21091   | 1740168   | 2.12635541  | down |
| MACS_PEAK_31   | 22   | 8.87  | 1500015010Rik | 181726  | 3130368   | 1.779098392 | down |
| MACS_PEAK_32   | 19   | 6.06  | 1500015010Rik | 146834  | 3130368   | 1.779098392 | down |
| MACS_PEAK_37   | 22   | 9.69  | Col5a2        | 108798  | 104670129 | 2.087709427 | down |
| MACS_PEAK_42   | 40   | 7.88  | Myo1b         | 81459   | 101410168 | 1.891579628 | down |
| MACS_PEAK_42   | 40   | 7.88  | Myo1b         | 81459   | 105910021 | 2.122879982 | down |
| MACS_PEAK_43   | 23   | 6.65  | Nab1          | 245920  | 6660056   | 2.304262161 | down |
| MACS_PEAK_44   | 20   | 6.9   | Pms1          | 94944   | 4540164   | 1.542927265 | up   |
| MACS_PEAK_60   | 25   | 12.12 | Nrp2          | 628174  | 6650446   | 1.683444738 | down |
| MACS_PEAK_61   | 30   | 11.08 | Nrp2          | 547985  | 6650446   | 1.683444738 | down |
| MACS_PEAK_71   | 22   | 6.66  | Atic          | 173058  | 6380463   | 3.777183056 | down |
| MACS_PEAK_71   | 22   | 6.66  | Atic          | 173058  | 4010593   | 1.716966033 | down |
| MACS_PEAK_72   | 28   | 9.85  | Fn1           | 232898  | 6220288   | 3.997449636 | down |
| MACS_PEAK_72   | 28   | 9.85  | Fn1           | 232898  | 2970647   | 4.103619576 | down |
| MACS_PEAK_72   | 28   | 9.85  | Fn1           | 232898  | 1170601   | 1.853502989 | down |
| MACS_PEAK_83   | 28   | 13.93 | Slc4a3        | 479997  | 360603    | 1.932770133 | up   |
| MACS_PEAK_84   | 23   | 9.09  | Slc4a3        | 544307  | 360603    | 1.932770133 | up   |
| MACS_PEAK_85   | 18   | 8.31  | Slc4a3        | 965059  | 360603    | 1.932770133 | up   |
| MACS_PEAK_87   | 23   | 10.91 | Epha4         | 501660  | 460750    | 1.665304303 | up   |
| MACS_PEAK_103  | 43   | 19.99 | Hdac4         | 231047  | 460079    | 1.829596639 | up   |
| MACS_PEAK_108  | 30   | 12.72 | Gin1          | 153499  | 104760605 | 1.599875689 | down |
| MACS_PEAK_116  | 51   | 16.26 | Gli2          | 335421  | 3060632   | 1.640829682 | down |
| MACS_PEAK_117  | 39   | 14.96 | Gli2          | 253774  | 3060632   | 1.640829682 | down |
| MACS_PEAK_119  | 16   | 6.66  | Ralb          | 67079   | 6130397   | 1.575715542 | up   |
| MACS_PEAK_134  | 33   | 16.96 | Tmcc2         | 28759   | 6900762   | 1.511455655 | up   |
| MACS_PEAK_144  | 20   | 7.27  | Hmnc1         | 458499  | 104570670 | 3.694500208 | down |
| MACS_PEAK_158  | 18   | 9.51  | Angptl1       | 97823   | 104920372 | 2.244338512 | down |
| MACS_PEAK_159  | 22   | 9.42  | Fam20b        | 89613   | 2030215   | 1.650509834 | down |
| MACS_PEAK_164  | 82   | 13    | Dnm3os        | 217321  | 102940671 | 2.063773394 | down |

|                |     |        |               |         |           |             |      |
|----------------|-----|--------|---------------|---------|-----------|-------------|------|
| MACS_PEAK_165  | 51  | 9.09   | Dnm3os        | 202855  | 102940671 | 2.063773394 | down |
| MACS_PEAK_166  | 66  | 22.42  | Dnm3os        | 200520  | 102940671 | 2.063773394 | down |
| MACS_PEAK_167  | 17  | 8.48   | Dnm3os        | 197067  | 102940671 | 2.063773394 | down |
| MACS_PEAK_168  | 172 | 67.85  | Dnm3os        | 180919  | 102940671 | 2.063773394 | down |
| MACS_PEAK_169  | 15  | 8.48   | Dnm3os        | 158916  | 102940671 | 2.063773394 | down |
| MACS_PEAK_183  | 36  | 13.72  | Atp1a2        | 10018   | 110278    | 1.724053264 | down |
| MACS_PEAK_184  | 20  | 7.27   | Slamf9        | 69024   | 3710800   | 1.585953236 | up   |
| MACS_PEAK_185  | 20  | 6.06   | Ccpi170       | 7110    | 4850575   | 2.83363231  | down |
| MACS_PEAK_186  | 22  | 12.12  | Zfp238        | 243515  | 5050537   | 2.892208099 | down |
| MACS_PEAK_187  | 15  | 7.27   | Zfp238        | 105552  | 5050537   | 2.892208099 | down |
| MACS_PEAK_200  | 66  | 18.29  | Lbr           | 307059  | 107040471 | 3.998609781 | down |
| MACS_PEAK_221  | 18  | 8.14   | Ultrn         | 1369568 | 3390048   | 3.522297144 | down |
| MACS_PEAK_225  | 24  | 9.69   | Pex3          | 161566  | 2760100   | 2.427631855 | down |
| MACS_PEAK_230  | 23  | 9.42   | Pex7          | 28911   | 6660270   | 1.907020807 | down |
| MACS_PEAK_231  | 25  | 9.65   | Ahi1          | 61357   | 460520    | 1.553654432 | up   |
| MACS_PEAK_232  | 23  | 10.3   | Ahi1          | 72399   | 460520    | 1.553654432 | up   |
| MACS_PEAK_240  | 20  | 9.09   | Tpd521i       | 146343  | 5570575   | 2.081928015 | down |
| MACS_PEAK_240  | 20  | 9.09   | Tpd521i       | 146343  | 4590711   | 2.67099905  | down |
| MACS_PEAK_265  | 21  | 8.48   | Cd24a         | 23266   | 1780091   | 1.825586438 | up   |
| MACS_PEAK_266  | 31  | 9.69   | Cd24a         | 42573   | 1780091   | 1.825586438 | up   |
| MACS_PEAK_279  | 60  | 21.34  | Hsf2          | 617053  | 1400465   | 1.642094493 | up   |
| MACS_PEAK_281  | 87  | 26.26  | Ccfc109a      | 154120  | 106530467 | 4.056745529 | down |
| MACS_PEAK_301  | 49  | 19.99  | Mitf          | 21401   | 105720132 | 1.607923269 | down |
| MACS_PEAK_302  | 28  | 13.33  | Pcmt          | 79479   | 4760053   | 1.886447549 | down |
| MACS_PEAK_303  | 38  | 14.96  | Pcbp3         | 231631  | 940332    | 1.630687714 | up   |
| MACS_PEAK_323  | 26  | 7.27   | Tmpo          | 687637  | 4050494   | 4.254616261 | down |
| MACS_PEAK_324  | 24  | 8.53   | Tmpo          | 864763  | 4050494   | 4.254616261 | down |
| MACS_PEAK_333  | 18  | 7.88   | Dcn           | 653063  | 510332    | 3.202011585 | down |
| MACS_PEAK_336  | 16  | 7.27   | Atp2b1        | 622796  | 104150181 | 1.961512804 | down |
| MACS_PEAK_343  | 31  | 9.65   | Zdhc17        | 79215   | 104050288 | 2.077921391 | down |
| MACS_PEAK_346  | 204 | 100.57 | Phlda1        | 419342  | 2450020   | 2.164865017 | down |
| MACS_PEAK_349  | 40  | 19.99  | Zfc3h1        | 134065  | 4070706   | 1.60190773  | down |
| MACS_PEAK_350  | 36  | 12.72  | Lgr5          | 224190  | 6020400   | 2.284122944 | down |
| MACS_PEAK_354  | 21  | 7.88   | Yeats4        | 61668   | 3130242   | 3.189333439 | down |
| MACS_PEAK_356  | 73  | 35.14  | Cpm           | 43602   | 103440025 | 1.511164546 | up   |
| MACS_PEAK_366  | 21  | 7.88   | MsrB3         | 26677   | 103140053 | 2.706700563 | down |
| MACS_PEAK_366  | 21  | 7.88   | MsrB3         | 26677   | 510014    | 1.54449749  | down |
| MACS_PEAK_386  | 21  | 8.48   | Igfbp3        | 1210735 | 2370500   | 5.452507973 | down |
| MACS_PEAK_393  | 21  | 8.48   | Grb10         | 397336  | 106110546 | 2.013310194 | up   |
| MACS_PEAK_407  | 22  | 6.1    | Spnb2         | 147853  | 380091    | 2.274885654 | down |
| MACS_PEAK_412  | 26  | 10.91  | Slit3         | 391394  | 106650441 | 2.003383636 | up   |
| MACS_PEAK_427  | 19  | 6.1    | Gfpt2         | 51075   | 102810242 | 1.50763905  | up   |
| MACS_PEAK_429  | 22  | 5.59   | Clk4          | 143478  | 3610156   | 11.9104557  | down |
| MACS_PEAK_431  | 15  | 7.88   | Hspa4         | 381116  | 1050170   | 1.625148892 | up   |
| MACS_PEAK_448  | 28  | 12.12  | 2810001G2ORik | 55190   | 102320292 | 1.537947655 | down |
| MACS_PEAK_449  | 63  | 29.08  | Hs3st3a1      | 224168  | 2230497   | 1.850928664 | down |
| MACS_PEAK_450  | 33  | 12.12  | 2810001G2ORik | 242736  | 102320292 | 1.537947655 | down |
| MACS_PEAK_451  | 29  | 9.69   | Elac2         | 429511  | 3440167   | 1.903346419 | down |
| MACS_PEAK_455  | 81  | 29.08  | Myh10         | 53448   | 2640673   | 1.793132901 | down |
| MACS_PEAK_483  | 41  | 13.3   | Rad51c        | 18716   | 3780592   | 2.507941961 | down |
| MACS_PEAK_484  | 25  | 6.66   | Rad51c        | 22434   | 3780592   | 2.507941961 | down |
| MACS_PEAK_485  | 89  | 7.86   | Rad51c        | 38837   | 3780592   | 2.507941961 | down |
| MACS_PEAK_486  | 16  | 5.45   | Rad51c        | 44328   | 3780592   | 2.507941961 | down |
| MACS_PEAK_487  | 17  | 5.45   | Rad51c        | 58031   | 3780592   | 2.507941961 | down |
| MACS_PEAK_491  | 26  | 8.44   | Msi2          | 409121  | 103140390 | 2.370386839 | down |
| MACS_PEAK_492  | 46  | 19.99  | Akap1         | 86193   | 2260019   | 2.008526325 | down |
| MACS_PEAK_492  | 46  | 19.99  | Akap1         | 86193   | 110148    | 2.098371983 | down |
| MACS_PEAK_493  | 33  | 10.3   | Akap1         | 80948   | 2260019   | 2.008526325 | down |
| MACS_PEAK_493  | 33  | 10.3   | Akap1         | 80948   | 110148    | 2.098371983 | down |
| MACS_PEAK_515  | 25  | 10.35  | Myi4          | 87658   | 6860288   | 2.878082514 | up   |
| MACS_PEAK_516  | 22  | 8.21   | Tlk2          | 104341  | 1170161   | 2.544542074 | up   |
| MACS_PEAK_518  | 42  | 13.93  | Pitpnc1       | 246585  | 3990017   | 2.315482378 | down |
| MACS_PEAK_570  | 18  | 7.03   | Osr1          | 407844  | 1500025   | 1.59414053  | up   |
| MACS_PEAK_570  | 18  | 7.03   | Osr1          | 407844  | 5270706   | 2.1889112   | up   |
| MACS_PEAK_582  | 18  | 4.7    | 2410018L13Rik | 1565775 | 103130193 | 2.196941376 | down |
| MACS_PEAK_583  | 23  | 9.69   | 2410018L13Rik | 904410  | 103130193 | 2.196941376 | down |
| MACS_PEAK_595  | 29  | 16.36  | Chil1         | 44694   | 103030487 | 2.064683437 | up   |
| MACS_PEAK_609  | 19  | 8.31   | Etv1          | 1159437 | 70735     | 4.297760963 | down |
| MACS_PEAK_609  | 19  | 8.31   | Etv1          | 1159437 | 5080463   | 3.938217402 | down |
| MACS_PEAK_610  | 25  | 9.79   | Etv1          | 1233296 | 70735     | 4.297760963 | down |
| MACS_PEAK_610  | 25  | 9.79   | Etv1          | 1233296 | 5080463   | 3.938217402 | down |
| MACS_PEAK_623  | 27  | 9.09   | Sec23a        | 581978  | 5860035   | 11.70175171 | down |
| MACS_PEAK_624  | 29  | 12.72  | Sec23a        | 460966  | 5860035   | 11.70175171 | down |
| MACS_PEAK_629  | 25  | 9.09   | Frdm6         | 292452  | 4670019   | 1.692186475 | up   |
| MACS_PEAK_631  | 19  | 7.76   | Actr10        | 59884   | 5860458   | 3.908699751 | down |
| MACS_PEAK_640  | 15  | 7.88   | Mnat1         | 100349  | 2350364   | 1.589990497 | down |
| MACS_PEAK_641  | 14  | 8.48   | Mnat1         | 131615  | 2350364   | 1.589990497 | down |
| MACS_PEAK_670  | 23  | 6.65   | 0610007P14Rik | 65930   | 6450273   | 8.547762871 | down |
| MACS_PEAK_692  | 34  | 8.64   | Papola        | 287146  | 4200286   | 2.137450933 | down |
| MACS_PEAK_693  | 47  | 19.39  | Bcl11b        | 1219588 | 106860278 | 1.845429659 | down |
| MACS_PEAK_694  | 28  | 11.14  | Bcl11b        | 1217871 | 106860278 | 1.845429659 | down |
| MACS_PEAK_695  | 102 | 49.07  | Bcl11b        | 1206516 | 106860278 | 1.845429659 | down |
| MACS_PEAK_710  | 31  | 11.18  | Igfb8         | 162951  | 105050025 | 1.710262179 | up   |
| MACS_PEAK_714  | 44  | 14.74  | Klff6         | 1089990 | 110541    | 1.667094707 | up   |
| MACS_PEAK_727  | 17  | 9.09   | Zfp184        | 46906   | 101770338 | 1.631226897 | up   |
| MACS_PEAK_728  | 19  | 6.66   | Zfp184        | 30011   | 101770338 | 1.631226897 | up   |
| MACS_PEAK_740  | 32  | 8.64   | Sox4          | 535687  | 2260091   | 2.331992149 | up   |
| MACS_PEAK_745  | 26  | 8.48   | Sox4          | 463494  | 2260091   | 2.331992149 | up   |
| MACS_PEAK_753  | 27  | 15.15  | Gmcs          | 374534  | 1050519   | 1.810869336 | down |
| MACS_PEAK_754  | 56  | 15.68  | Gmcs          | 367587  | 1050519   | 1.810869336 | down |
| MACS_PEAK_755  | 28  | 4.85   | Gmcs          | 345783  | 1050519   | 1.810869336 | down |
| MACS_PEAK_756  | 19  | 7.88   | Gmcs          | 329377  | 1050519   | 1.810869336 | down |
| MACS_PEAK_757  | 139 | 70.88  | Gmcs          | 301428  | 1050519   | 1.810869336 | down |
| MACS_PEAK_758  | 18  | 7.88   | Gmcs          | 298219  | 1050519   | 1.810869336 | down |
| MACS_PEAK_759  | 120 | 21.57  | Gmcs          | 289901  | 1050519   | 1.810869336 | down |
| MACS_PEAK_765  | 26  | 12.12  | Gmcs          | 228114  | 1050519   | 1.810869336 | down |
| MACS_PEAK_769  | 18  | 6.06   | 1300014I06Rik | 264417  | 3780673   | 2.328416109 | down |
| MACS_PEAK_770  | 20  | 8.48   | 1300014I06Rik | 173370  | 3780673   | 2.328416109 | down |
| MACS_PEAK_777  | 15  | 7.88   | Tmem14c       | 33378   | 670647    | 2.00219965  | down |
| MACS_PEAK_801  | 71  | 29.07  | Gadd45g       | 85237   | 2510142   | 1.811520219 | down |
| MACS_PEAK_842  | 18  | 6.66   | Cetn3         | 1360205 | 3170402   | 1.552112699 | down |
| MACS_PEAK_843  | 33  | 15.75  | Cetn3         | 1429488 | 3170402   | 1.552112699 | down |
| MACS_PEAK_868  | 23  | 11.51  | Zbed3         | 50413   | 3290040   | 1.952820301 | up   |
| MACS_PEAK_869  | 31  | 9.09   | Zbed3         | 7553    | 3290040   | 1.952820301 | up   |
| MACS_PEAK_879  | 23  | 10.91  | Mtap1b        | 68490   | 6040435   | 1.969672322 | down |
| MACS_PEAK_879  | 23  | 10.91  | Mtap1b        | 68490   | 2230332   | 4.394807816 | down |
| MACS_PEAK_880  | 30  | 9.09   | Mtap1b        | 299352  | 6040435   | 1.969672322 | down |
| MACS_PEAK_880  | 30  | 9.09   | Mtap1b        | 299352  | 2230332   | 4.394807816 | down |
| MACS_PEAK_882  | 24  | 12.72  | Cdk7          | 38207   | 102230128 | 1.786380172 | up   |
| MACS_PEAK_900  | 20  | 8.48   | Gbbp1         | 222517  | 2060162   | 1.781497478 | down |
| MACS_PEAK_901  | 33  | 11.76  | Gbbp1         | 197895  | 2060162   | 1.781497478 | down |
| MACS_PEAK_903  | 49  | 15.78  | Esm1          | 208498  | 1410594   | 1.808077216 | up   |
| MACS_PEAK_904  | 27  | 8.71   | Esm1          | 377861  | 1410594   | 1.808077216 | up   |
| MACS_PEAK_912  | 23  | 6.06   | Emb           | 247121  | 610270    | 1.961876035 | down |
| MACS_PEAK_927  | 78  | 27.94  | 2700060E02Rik | 96667   | 4150091   | 4.437078953 | down |
| MACS_PEAK_928  | 33  | 15.15  | Adk           | 410029  | 520180    | 6.292619705 | down |
| MACS_PEAK_929  | 44  | 15.24  | Adk           | 423551  | 520180    | 6.292619705 | down |
| MACS_PEAK_971  | 39  | 16.93  | Dhrs4         | 199071  | 630670    | 2.238277435 | down |
| MACS_PEAK_998  | 23  | 9.42   | sic25a30      | 18902   | 6840707   | 2.348610163 | down |
| MACS_PEAK_1006 | 86  | 25.45  | 9030625A04Rik | 348436  | 2350441   | 2.277412415 | down |
| MACS_PEAK_1007 | 48  | 9.69   | 9030625A04Rik | 237443  | 2350441   | 2.277412415 | down |
| MACS_PEAK_1016 | 19  | 8.48   | Pcdh17        | 4175124 | 103840008 | 1.968291402 | up   |

|                |     |       |               |         |           |             |      |
|----------------|-----|-------|---------------|---------|-----------|-------------|------|
| MACS_PEAK_1017 | 21  | 9.69  | Pcdh17        | 4155712 | 103840008 | 1.968291402 | up   |
| MACS_PEAK_1024 | 21  | 7.88  | Dach1         | 476018  | 2450593   | 1.550462127 | down |
| MACS_PEAK_1025 | 82  | 44.83 | Dach1         | 820064  | 2450593   | 1.550462127 | down |
| MACS_PEAK_1027 | 21  | 6.65  | Kif12         | 917167  | 1660095   | 1.634319186 | up   |
| MACS_PEAK_1028 | 42  | 21.2  | Comm6         | 146195  | 1660474   | 1.511464834 | down |
| MACS_PEAK_1059 | 23  | 9.09  | Pcca          | 341964  | 3390400   | 2.243657351 | down |
| MACS_PEAK_1075 | 22  | 6.66  | Trio          | 245832  | 102320605 | 1.6330235   | down |
| MACS_PEAK_1075 | 22  | 6.66  | Trio          | 245832  | 103360497 | 1.626712561 | down |
| MACS_PEAK_1076 | 31  | 11.51 | Trio          | 237467  | 102320605 | 1.6330235   | down |
| MACS_PEAK_1076 | 31  | 11.51 | Trio          | 237467  | 103360497 | 1.626712561 | down |
| MACS_PEAK_1077 | 15  | 6.66  | Trio          | 227925  | 102320605 | 1.6330235   | down |
| MACS_PEAK_1077 | 15  | 6.66  | Trio          | 227925  | 103360497 | 1.626712561 | down |
| MACS_PEAK_1090 | 19  | 6.66  | Cthrc1        | 58521   | 103850632 | 7.363954544 | down |
| MACS_PEAK_1092 | 33  | 8.53  | Zfpm2         | 540055  | 460072    | 1.900486469 | down |
| MACS_PEAK_1094 | 25  | 10.3  | Zfpm2         | 724924  | 460072    | 1.900486469 | down |
| MACS_PEAK_1105 | 29  | 15.75 | Mtbp          | 243202  | 50193     | 3.607527256 | down |
| MACS_PEAK_1106 | 20  | 8.48  | Mtbp          | 283089  | 50193     | 3.607527256 | down |
| MACS_PEAK_1110 | 37  | 5.23  | Has2          | 467970  | 5360181   | 2.12053895  | down |
| MACS_PEAK_1115 | 44  | 20.6  | Nsmce2        | 174822  | 1770168   | 4.732778072 | down |
| MACS_PEAK_1116 | 47  | 18.78 | Nsmce2        | 260869  | 1770168   | 4.732778072 | down |
| MACS_PEAK_1142 | 32  | 15.75 | Mki1          | 71920   | 101170039 | 3.165697575 | up   |
| MACS_PEAK_1143 | 21  | 7.88  | Rangap1       | 32548   | 2320593   | 3.907580376 | down |
| MACS_PEAK_1151 | 21  | 7.88  | Lrk1          | 162397  | 462397    | 1.63201201  | up   |
| MACS_PEAK_1154 | 28  | 12.72 | Pdzrn4        | 414213  | 102120746 | 1.600646615 | down |
| MACS_PEAK_1160 | 17  | 7.76  | Pricde1       | 599160  | 103190427 | 3.681575537 | down |
| MACS_PEAK_1207 | 24  | 7.88  | Comt          | 32833   | 360687    | 1.879665375 | down |
| MACS_PEAK_1212 | 17  | 6.06  | Etv5          | 172890  | 110017    | 1.707441449 | down |
| MACS_PEAK_1213 | 31  | 13.33 | Etv5          | 98088   | 110017    | 1.707441449 | down |
| MACS_PEAK_1227 | 16  | 7.88  | Pcyt1a        | 41212   | 1450619   | 1.650879741 | up   |
| MACS_PEAK_1229 | 29  | 12.72 | Snx4          | 74792   | 106520008 | 1.918561816 | up   |
| MACS_PEAK_1237 | 181 | 8.81  | Pdia5         | 94730   | 5550040   | 2.353853941 | down |
| MACS_PEAK_1241 | 23  | 12.3  | Lsamp         | 2488806 | 2810056   | 1.558461189 | down |
| MACS_PEAK_1247 | 21  | 10.3  | Phldb2        | 92384   | 6590685   | 2.147843361 | up   |
| MACS_PEAK_1250 | 18  | 7.88  | Cblb          | 1184868 | 106520066 | 2.736266136 | up   |
| MACS_PEAK_1251 | 39  | 14.54 | Cblb          | 913638  | 106520066 | 2.736266136 | up   |
| MACS_PEAK_1264 | 68  | 34.91 | Cxadr         | 387157  | 106550400 | 2.025967121 | down |
| MACS_PEAK_1290 | 40  | 21.2  | Dyrk1a        | 256293  | 102940021 | 1.69041121  | up   |
| MACS_PEAK_1295 | 21  | 7.88  | Ets2          | 115552  | 360451    | 1.974570274 | down |
| MACS_PEAK_1297 | 50  | 16.96 | Ets2          | 146293  | 360451    | 1.974570274 | down |
| MACS_PEAK_1298 | 41  | 13.5  | Ets2          | 220301  | 360451    | 1.974570274 | down |
| MACS_PEAK_1299 | 22  | 8.31  | Ets2          | 222681  | 360451    | 1.974570274 | down |
| MACS_PEAK_1312 | 19  | 7.27  | T             | 286933  | 6370164   | 1.527101755 | down |
| MACS_PEAK_1325 | 24  | 9.69  | Chd1          | 103906  | 4590048   | 2.344444752 | down |
| MACS_PEAK_1345 | 99  | 5.76  | H2-T23        | 11684   | 102340121 | 1.792632103 | up   |
| MACS_PEAK_1345 | 99  | 5.76  | H2-T23        | 11684   | 2856069   | 1.710852146 | up   |
| MACS_PEAK_1380 | 36  | 4.81  | Ptprm         | 695005  | 6370136   | 1.623142838 | down |
| MACS_PEAK_1407 | 33  | 14.54 | Slc8a1        | 1410190 | 3440717   | 1.785566211 | up   |
| MACS_PEAK_1407 | 33  | 14.54 | Slc8a1        | 1410190 | 106290288 | 1.83786571  | up   |
| MACS_PEAK_1408 | 28  | 8.48  | Slc8a1        | 1418498 | 3440717   | 1.785566211 | up   |
| MACS_PEAK_1408 | 28  | 8.48  | Slc8a1        | 1418498 | 106290288 | 1.83786571  | up   |
| MACS_PEAK_1415 | 23  | 6.65  | Srbd1         | 432027  | 6980750   | 1.95819664  | up   |
| MACS_PEAK_1416 | 34  | 12.12 | Srbd1         | 275653  | 6980750   | 1.95819664  | up   |
| MACS_PEAK_1417 | 55  | 20.16 | Srbd1         | 274322  | 6980750   | 1.95819664  | up   |
| MACS_PEAK_1418 | 55  | 29.69 | Srbd1         | 242386  | 6980750   | 1.95819664  | up   |
| MACS_PEAK_1419 | 36  | 11.25 | Srbd1         | 230341  | 6980750   | 1.95819664  | up   |
| MACS_PEAK_1427 | 21  | 7.88  | Cul2          | 126215  | 102190519 | 1.710577726 | down |
| MACS_PEAK_1447 | 23  | 9.09  | Zfp521        | 891151  | 540541    | 2.007312298 | down |
| MACS_PEAK_1448 | 20  | 8.48  | Zfp521        | 512522  | 540541    | 2.007312298 | down |
| MACS_PEAK_1449 | 21  | 6.66  | Ss18          | 829666  | 6900129   | 1.854062438 | down |
| MACS_PEAK_1450 | 26  | 7.84  | Ss18          | 739907  | 6900129   | 1.854062438 | down |
| MACS_PEAK_1451 | 52  | 24.23 | Ss18          | 691786  | 6900129   | 1.854062438 | down |
| MACS_PEAK_1452 | 42  | 23.02 | Ss18          | 22536   | 6900129   | 1.854062438 | down |
| MACS_PEAK_1456 | 25  | 9.66  | Ino80c        | 100891  | 2510632   | 1.872328758 | down |
| MACS_PEAK_1489 | 23  | 9.42  | Dmxi1         | 60281   | 101500465 | 2.709820271 | down |
| MACS_PEAK_1495 | 20  | 7.2   | Srx24         | 102610  | 5720398   | 1.611333132 | down |
| MACS_PEAK_1549 | 24  | 7.42  | Dcc           | 935633  | 101230170 | 1.609910727 | up   |
| MACS_PEAK_1570 | 20  | 7.88  | 1700034H14Rik | 746729  | 6100348   | 2.242739677 | down |
| MACS_PEAK_1570 | 20  | 7.88  | 1700034H14Rik | 746729  | 840021    | 5.542374134 | down |
| MACS_PEAK_1579 | 18  | 9.09  | Mpeg1         | 27580   | 103780671 | 12.81386948 | up   |
| MACS_PEAK_1584 | 29  | 12.72 | Gnaq          | 82026   | 430670    | 1.843773246 | up   |
| MACS_PEAK_1587 | 50  | 15.75 | Gcnt1         | 13749   | 940129    | 1.885344744 | down |
| MACS_PEAK_1587 | 50  | 15.75 | Gcnt1         | 13749   | 1780215   | 2.185174465 | down |
| MACS_PEAK_1593 | 35  | 11.08 | Fam108b       | 128903  | 6650487   | 2.886203051 | down |
| MACS_PEAK_1594 | 63  | 7.34  | Tmem2         | 536987  | 3290020   | 1.734024167 | down |
| MACS_PEAK_1599 | 84  | 28.3  | Kank1         | 158288  | 3450546   | 5.633127213 | down |
| MACS_PEAK_1600 | 47  | 18.78 | Kank1         | 164584  | 3450546   | 5.633127213 | down |
| MACS_PEAK_1604 | 28  | 9.09  | Ranbp6        | 121079  | 360164    | 2.431586504 | down |
| MACS_PEAK_1632 | 49  | 12.91 | Smc3          | 92211   | 870546    | 2.958533287 | down |
| MACS_PEAK_1633 | 27  | 12.75 | Gpam          | 788101  | 1740180   | 1.720186472 | down |
| MACS_PEAK_1647 | 21  | 6.06  | Slc18a2       | 64124   | 6420541   | 1.563637495 | down |
| MACS_PEAK_1661 | 34  | 8.13  | Atpsr1        | 90305   | 102630438 | 1.586645383 | down |
| MACS_PEAK_1666 | 21  | 6.66  | Aufs          | 1115709 | 3840059   | 1.855834844 | up   |
| MACS_PEAK_1677 | 33  | 10.02 | Sec16a        | 42148   | 5690280   | 1.556519032 | up   |
| MACS_PEAK_1678 | 25  | 8.78  | Sec16a        | 56595   | 5690280   | 1.556519032 | up   |
| MACS_PEAK_1688 | 14  | 7.27  | Crat          | 26178   | 540020    | 1.672328115 | up   |
| MACS_PEAK_1710 | 20  | 9.14  | Psmb7         | 128234  | 5890647   | 3.241960049 | down |
| MACS_PEAK_1711 | 83  | 42.41 | Psmb7         | 103450  | 5890647   | 3.241960049 | down |
| MACS_PEAK_1716 | 37  | 17.57 | Nmi           | 64809   | 520270    | 2.010234594 | up   |
| MACS_PEAK_1721 | 16  | 7.27  | Fmnl2         | 195942  | 4060438   | 2.74194026  | down |
| MACS_PEAK_1721 | 16  | 7.27  | Fmnl2         | 195942  | 104050215 | 5.00082922  | down |
| MACS_PEAK_1723 | 76  | 34.53 | Cytip         | 104466  | 1780408   | 1.794008255 | up   |
| MACS_PEAK_1754 | 25  | 13.33 | Pde1a         | 109544  | 1050458   | 1.505442142 | up   |
| MACS_PEAK_1775 | 16  | 8.48  | Dnajc24       | 412181  | 670095    | 2.561006069 | down |
| MACS_PEAK_1776 | 36  | 14.54 | Dnajc24       | 421568  | 670095    | 2.561006069 | down |
| MACS_PEAK_1781 | 47  | 15.75 | Bbox1         | 47773   | 2030538   | 1.536293983 | down |
| MACS_PEAK_1784 | 27  | 13.93 | Aqr           | 67659   | 106760358 | 1.522784352 | up   |
| MACS_PEAK_1803 | 20  | 7.88  | Usp9          | 91299   | 2640347   | 3.155760288 | down |
| MACS_PEAK_1825 | 24  | 9.98  | Mkks          | 16214   | 2760722   | 2.561979294 | down |
| MACS_PEAK_1826 | 58  | 28.47 | Jag1          | 1161889 | 3440390   | 2.487917185 | up   |
| MACS_PEAK_1844 | 30  | 10.32 | Pygb          | 21076   | 2510731   | 1.859453082 | up   |
| MACS_PEAK_1881 | 54  | 23.63 | Ube2v1        | 88415   | 2470093   | 3.053926945 | down |
| MACS_PEAK_1882 | 53  | 16.66 | Ptpn1         | 204998  | 104070408 | 1.964437604 | up   |
| MACS_PEAK_1895 | 36  | 9.87  | Pmepa1        | 143687  | 105910082 | 1.68865335  | up   |
| MACS_PEAK_1914 | 18  | 9.69  | Zfp704        | 141210  | 4120452   | 1.911498547 | up   |
| MACS_PEAK_1915 | 19  | 5.3   | Zfp704        | 185160  | 4120452   | 1.911498547 | up   |
| MACS_PEAK_1919 | 32  | 15.75 | Zfand1        | 30443   | 5080215   | 1.753351569 | up   |
| MACS_PEAK_1920 | 60  | 19.39 | Zfand1        | 36170   | 5080215   | 1.753351569 | up   |
| MACS_PEAK_1986 | 20  | 12.12 | Mbnl1         | 360935  | 7100048   | 1.567408085 | down |
| MACS_PEAK_1989 | 29  | 12.72 | Mbnl1         | 270859  | 7100048   | 1.567408085 | down |
| MACS_PEAK_2000 | 18  | 7.88  | Ptx3          | 72728   | 3520102   | 2.436686712 | down |
| MACS_PEAK_2000 | 18  | 7.88  | Ptx3          | 72728   | 870309    | 2.150045156 | down |
| MACS_PEAK_2008 | 28  | 12.72 | Rangel2       | 127676  | 105080278 | 1.643891573 | down |
| MACS_PEAK_2014 | 53  | 29.08 | Sfrp2         | 156778  | 4850097   | 2.048348904 | down |
| MACS_PEAK_2015 | 26  | 9.09  | Sfrp2         | 125690  | 4850097   | 2.048348904 | down |
| MACS_PEAK_2018 | 21  | 8.48  | Fcrs1         | 112687  | 60204     | 17.65731239 | up   |
| MACS_PEAK_2019 | 21  | 7.42  | Crabp2        | 11960   | 6940725   | 1.603922963 | up   |
| MACS_PEAK_2047 | 65  | 26.66 | Tspan2        | 25678   | 3940161   | 2.072137594 | down |
| MACS_PEAK_2049 | 19  | 8.05  | Olfml3        | 87355   | 7100463   | 1.811375737 | up   |
| MACS_PEAK_2052 | 46  | 21.81 | Cttnbp2nl     | 58965   | 510451    | 1.536500096 | down |
| MACS_PEAK_2057 | 37  | 13.93 | Psma5         | 49426   | 5390537   | 2.644881964 | up   |
| MACS_PEAK_2066 | 17  | 7.88  | Col11a1       | 331330  | 2100300   | 3.070882559 | down |
| MACS_PEAK_2066 | 17  | 7.88  | Col11a1       | 331330  | 4810524   | 2.09778595  | down |



|                |     |       |               |         |           |             |      |
|----------------|-----|-------|---------------|---------|-----------|-------------|------|
| MACS_PEAk_2071 | 39  | 15.64 | Alg14         | 98578   | 5390204   | 1.762085676 | down |
| MACS_PEAk_2084 | 26  | 8.31  | Pitx2         | 851992  | 870537    | 2.135507107 | down |
| MACS_PEAk_2088 | 48  | 16.36 | Col25a1       | 270105  | 4480168   | 1.570342064 | down |
| MACS_PEAk_2088 | 48  | 16.36 | Col25a1       | 270105  | 1580072   | 1.931287408 | down |
| MACS_PEAk_2094 | 25  | 9.65  | Ppp3ca        | 597210  | 4760332   | 1.671500087 | down |
| MACS_PEAk_2095 | 56  | 19.7  | Ppp3ca        | 619092  | 4760332   | 1.671500087 | down |
| MACS_PEAk_2138 | 41  | 19.39 | Asph          | 210125  | 2810064   | 2.211745739 | down |
| MACS_PEAk_2138 | 41  | 19.39 | Asph          | 210125  | 4280133   | 3.164897359 | down |
| MACS_PEAk_2138 | 41  | 19.39 | Asph          | 210125  | 3140040   | 1.784584761 | down |
| MACS_PEAk_2138 | 41  | 19.39 | Asph          | 210125  | 6370671   | 2.434479952 | down |
| MACS_PEAk_2138 | 41  | 19.39 | Asph          | 210125  | 6940338   | 1.963395834 | down |
| MACS_PEAk_2138 | 41  | 19.39 | Asph          | 210125  | 2100066   | 1.670410752 | down |
| MACS_PEAk_2138 | 41  | 19.39 | Asph          | 210125  | 2970008   | 2.169843674 | down |
| MACS_PEAk_2138 | 41  | 19.39 | Asph          | 210125  | 360722    | 1.685213923 | down |
| MACS_PEAk_2138 | 41  | 19.39 | Asph          | 210125  | 3800750   | 1.967881799 | down |
| MACS_PEAk_2138 | 41  | 19.39 | Asph          | 210125  | 4210014   | 4.216923714 | down |
| MACS_PEAk_2138 | 41  | 19.39 | Asph          | 210125  | 2340121   | 2.216856718 | down |
| MACS_PEAk_2138 | 41  | 19.39 | Asph          | 210125  | 2650113   | 1.98672688  | down |
| MACS_PEAk_2147 | 44  | 21.81 | Bach2         | 333981  | 6760131   | 1.610206008 | down |
| MACS_PEAk_2156 | 40  | 9.75  | Melk          | 76573   | 130022    | 3.728048325 | down |
| MACS_PEAk_2167 | 18  | 6.65  | Zfp462        | 915547  | 6900100   | 3.295689821 | up   |
| MACS_PEAk_2168 | 25  | 9.69  | Zfp462        | 829296  | 6900100   | 3.295689821 | up   |
| MACS_PEAk_2221 | 39  | 10.63 | Jur           | 431608  | 840170    | 1.758324981 | up   |
| MACS_PEAk_2242 | 29  | 11.08 | C8b           | 366661  | 6770687   | 3.325871229 | down |
| MACS_PEAk_2246 | 18  | 7.88  | Ppap2b        | 883189  | 4730280   | 4.089593887 | down |
| MACS_PEAk_2247 | 25  | 12.12 | Ppap2b        | 904542  | 4730280   | 4.089593887 | down |
| MACS_PEAk_2248 | 55  | 21.2  | Ppap2b        | 1075270 | 4730280   | 4.089593887 | down |
| MACS_PEAk_2250 | 25  | 8.29  | Yipf1         | 27047   | 6900300   | 1.664879918 | up   |
| MACS_PEAk_2265 | 44  | 25.45 | Ppt1          | 45439   | 6450440   | 2.951411963 | down |
| MACS_PEAk_2271 | 51  | 19.59 | Trappc3       | 16279   | 6026069   | 5.257313251 | down |
| MACS_PEAk_2271 | 51  | 19.59 | Trappc3       | 16279   | 2030176   | 2.373871088 | down |
| MACS_PEAk_2271 | 51  | 19.59 | Trappc3       | 16279   | 6590373   | 3.298223019 | down |
| MACS_PEAk_2282 | 65  | 25.4  | Extl1         | 23391   | 2690136   | 3.756691933 | down |
| MACS_PEAk_2289 | 20  | 7.27  | Ephb2         | 157267  | 2100541   | 1.536585331 | down |
| MACS_PEAk_2308 | 47  | 13.93 | Spsb1         | 111063  | 2850093   | 2.480366468 | down |
| MACS_PEAk_2314 | 30  | 8.13  | Camta1        | 506255  | 2630458   | 2.402442694 | down |
| MACS_PEAk_2326 | 22  | 9.69  | Akap9         | 34121   | 2080195   | 1.569421291 | up   |
| MACS_PEAk_2337 | 39  | 10.67 | Hgf           | 781542  | 102030184 | 2.11736989  | up   |
| MACS_PEAk_2342 | 30  | 13.33 | Ptpn12        | 120046  | 6290609   | 2.747475624 | down |
| MACS_PEAk_2342 | 30  | 13.33 | Ptpn12        | 120046  | 6020725   | 3.96179533  | down |
| MACS_PEAk_2342 | 30  | 13.33 | Ptpn12        | 120046  | 6130746   | 5.469593525 | down |
| MACS_PEAk_2352 | 23  | 8.48  | Maea          | 43107   | 1170392   | 4.912212849 | down |
| MACS_PEAk_2365 | 19  | 6.66  | Slit2         | 1250504 | 106400110 | 2.072291613 | up   |
| MACS_PEAk_2365 | 19  | 6.66  | Slit2         | 1250504 | 101190064 | 2.298761606 | up   |
| MACS_PEAk_2398 | 28  | 9.09  | Chic2         | 202833  | 4540722   | 2.126761436 | down |
| MACS_PEAk_2401 | 29  | 14.54 | Exoc1         | 83783   | 102810438 | 2.457518816 | down |
| MACS_PEAk_2409 | 30  | 13.33 | Dck           | 279153  | 6900411   | 2.230581284 | down |
| MACS_PEAk_2413 | 31  | 10.3  | Nup54         | 39858   | 4060278   | 2.283360004 | down |
| MACS_PEAk_2413 | 31  | 10.3  | Nup54         | 39858   | 2360156   | 2.326942205 | down |
| MACS_PEAk_2414 | 22  | 7.27  | Nup54         | 58350   | 4060278   | 2.283360004 | down |
| MACS_PEAk_2414 | 22  | 7.27  | Nup54         | 58350   | 2360156   | 2.326942205 | down |
| MACS_PEAk_2417 | 37  | 13.33 | Rasgef1b      | 299831  | 3670524   | 1.734761953 | up   |
| MACS_PEAk_2427 | 32  | 13.93 | Zfp326        | 160566  | 4010524   | 2.246153831 | up   |
| MACS_PEAk_2428 | 27  | 12.72 | Zfp326        | 329301  | 4010524   | 2.246153831 | up   |
| MACS_PEAk_2431 | 37  | 12.12 | Idua          | 8757    | 2690131   | 1.696261525 | down |
| MACS_PEAk_2446 | 26  | 8.16  | Pxn           | 17243   | 102370632 | 1.854892135 | up   |
| MACS_PEAk_2462 | 20  | 8.63  | Fam101a       | 131525  | 5570040   | 2.988392353 | down |
| MACS_PEAk_2463 | 27  | 9.69  | Fam101a       | 148629  | 5570040   | 2.988392353 | down |
| MACS_PEAk_2465 | 72  | 29.93 | 5930412G12Rik | 435713  | 106100670 | 1.563243985 | down |
| MACS_PEAk_2474 | 37  | 11.18 | Wbscr17       | 685840  | 2630095   | 2.079356194 | up   |
| MACS_PEAk_2475 | 31  | 8.48  | Wbscr17       | 878805  | 2630095   | 2.079356194 | up   |
| MACS_PEAk_2476 | 23  | 9.69  | Wbscr17       | 922192  | 2630095   | 2.079356194 | up   |
| MACS_PEAk_2480 | 21  | 7.76  | Gtf2i         | 80180   | 106290711 | 3.137578249 | down |
| MACS_PEAk_2485 | 15  | 8.48  | Rhbdd2        | 42342   | 870497    | 1.896586418 | up   |
| MACS_PEAk_2490 | 19  | 8.48  | Rab5          | 46848   | 770368    | 1.91449523  | down |
| MACS_PEAk_2495 | 19  | 7.88  | Mical2        | 116566  | 105029    | 1.728844047 | up   |
| MACS_PEAk_2500 | 21  | 8.48  | Fbxl18        | 81307   | 106100253 | 1.78158164  | up   |
| MACS_PEAk_2501 | 23  | 10.3  | Fbxl18        | 77454   | 106100253 | 1.78158164  | up   |
| MACS_PEAk_2502 | 29  | 12.19 | Actb          | 47093   | 5050047   | 3.328948975 | up   |
| MACS_PEAk_2502 | 29  | 12.19 | Actb          | 47093   | 2030204   | 2.797592163 | up   |
| MACS_PEAk_2502 | 29  | 12.19 | Actb          | 47093   | 2060215   | 6.623762131 | up   |
| MACS_PEAk_2506 | 21  | 9.09  | Cdk8          | 83823   | 1050113   | 1.871616602 | down |
| MACS_PEAk_2531 | 34  | 19.99 | Gilcc1        | 185717  | 2640082   | 1.538626552 | down |
| MACS_PEAk_2537 | 35  | 16.96 | Tcfec         | 811186  | 1170722   | 1.795204163 | up   |
| MACS_PEAk_2540 | 23  | 9.09  | Ing3          | 145711  | 2060390   | 4.327756405 | down |
| MACS_PEAk_2541 | 27  | 8.2   | Ing3          | 125946  | 2060390   | 4.327756405 | down |
| MACS_PEAk_2542 | 25  | 12.12 | Ing3          | 76956   | 2060390   | 4.327756405 | down |
| MACS_PEAk_2543 | 20  | 9.09  | Ptprz1        | 298049  | 100780411 | 1.908211827 | down |
| MACS_PEAk_2543 | 20  | 9.09  | Ptprz1        | 298049  | 105900121 | 2.008227348 | down |
| MACS_PEAk_2548 | 24  | 9.09  | Zc3hc1        | 10639   | 5720040   | 4.774459839 | down |
| MACS_PEAk_2548 | 24  | 9.09  | Zc3hc1        | 10639   | 3520541   | 1.506135337 | down |
| MACS_PEAk_2554 | 40  | 9.09  | Mest          | 43495   | 6620292   | 1.687818408 | down |
| MACS_PEAk_2554 | 40  | 9.09  | Mest          | 43495   | 4780440   | 8.560221672 | down |
| MACS_PEAk_2584 | 21  | 6.66  | Hoxa2         | 19368   | 2120121   | 1.682744145 | down |
| MACS_PEAk_2594 | 70  | 34.53 | Gadd45a       | 105043  | 2900717   | 1.737415195 | down |
| MACS_PEAk_2595 | 20  | 9.09  | Gadd45a       | 133041  | 2900717   | 1.737415195 | down |
| MACS_PEAk_2618 | 28  | 8.53  | Hdac11        | 44279   | 2510242   | 1.870505929 | up   |
| MACS_PEAk_2621 | 63  | 26.89 | Adams9        | 160778  | 101580446 | 1.56271708  | up   |
| MACS_PEAk_2622 | 30  | 13.93 | Adams9        | 165405  | 101580446 | 1.56271708  | up   |
| MACS_PEAk_2629 | 15  | 7.27  | Frmcd4b       | 329006  | 6770736   | 1.907487988 | up   |
| MACS_PEAk_2630 | 22  | 6.66  | Frmcd4b       | 266119  | 6770736   | 1.907487988 | up   |
| MACS_PEAk_2631 | 111 | 45.72 | Frmcd4b       | 333071  | 6770736   | 1.907487988 | up   |
| MACS_PEAk_2658 | 33  | 13.93 | Ccdc77        | 131299  | 780092    | 1.5072577   | up   |
| MACS_PEAk_2669 | 33  | 14.54 | Lrp6          | 126589  | 5130064   | 1.753937602 | down |
| MACS_PEAk_2687 | 45  | 14.22 | Etnk1         | 94220   | 100510161 | 3.267707677 | down |
| MACS_PEAk_2687 | 45  | 14.22 | Etnk1         | 94220   | 106420402 | 1.760330948 | down |
| MACS_PEAk_2687 | 45  | 14.22 | Etnk1         | 94220   | 103990484 | 1.924120307 | down |
| MACS_PEAk_2731 | 24  | 7.62  | Chst8         | 117433  | 1940050   | 1.671821713 | up   |
| MACS_PEAk_2749 | 25  | 11.51 | Tjp1          | 228888  | 6350184   | 1.732068419 | down |
| MACS_PEAk_2750 | 48  | 23.63 | Pcsk6         | 168560  | 520097    | 2.70586133  | down |
| MACS_PEAk_2751 | 22  | 6.36  | H47           | 56749   | 4070181   | 1.856332779 | down |
| MACS_PEAk_2801 | 30  | 12.72 | Mrpl48        | 27357   | 6100044   | 2.831741333 | down |
| MACS_PEAk_2801 | 30  | 12.72 | Mrpl48        | 27357   | 2260093   | 1.950306773 | down |
| MACS_PEAk_2802 | 40  | 14.54 | Mrpl48        | 46069   | 6100044   | 2.831741333 | down |
| MACS_PEAk_2802 | 40  | 14.54 | Mrpl48        | 46069   | 2260093   | 1.950306773 | down |
| MACS_PEAk_2806 | 23  | 8.48  | Stim1         | 166889  | 104810400 | 1.953275561 | up   |
| MACS_PEAk_2807 | 24  | 9.69  | Dchs1         | 19807   | 105890152 | 1.511523962 | up   |
| MACS_PEAk_2807 | 24  | 9.69  | Dchs1         | 19807   | 106510204 | 3.529207468 | up   |
| MACS_PEAk_2843 | 29  | 10.91 | Fgfr2         | 522411  | 5570402   | 4.836047649 | down |
| MACS_PEAk_2843 | 29  | 10.91 | Fgfr2         | 522411  | 100780364 | 1.819450498 | down |
| MACS_PEAk_2843 | 29  | 10.91 | Fgfr2         | 522411  | 4670601   | 1.686376214 | down |
| MACS_PEAk_2844 | 55  | 23.63 | Fgfr2         | 465147  | 5570402   | 4.836047649 | down |
| MACS_PEAk_2844 | 55  | 23.63 | Fgfr2         | 465147  | 100780364 | 1.819450498 | down |
| MACS_PEAk_2844 | 55  | 23.63 | Fgfr2         | 465147  | 4670601   | 1.686376214 | down |
| MACS_PEAk_2845 | 100 | 39.38 | Fgfr2         | 456515  | 5570402   | 4.836047649 | down |
| MACS_PEAk_2845 | 100 | 39.38 | Fgfr2         | 456515  | 100780364 | 1.819450498 | down |
| MACS_PEAk_2845 | 100 | 39.38 | Fgfr2         | 456515  | 4670601   | 1.686376214 | down |
| MACS_PEAk_2855 | 31  | 13.33 | Ptprc         | 49173   | 1660286   | 1.759332657 | up   |
| MACS_PEAk_2860 | 45  | 14.22 | Ebf3          | 228163  | 4200129   | 2.323424101 | down |
| MACS_PEAk_2861 | 38  | 11.18 | Glr3          | 33267   | 70563     | 1.531902909 | up   |
| MACS_PEAk_2873 | 24  | 10.98 | Ccnd1         | 162421  | 100380692 | 1.749664187 | down |
| MACS_PEAk_2874 | 84  | 24.38 | Ccnd1         | 254683  | 100380692 | 1.749664187 | down |

|                |     |       |               |         |           |             |      |
|----------------|-----|-------|---------------|---------|-----------|-------------|------|
| MACS_PEAk_2875 | 54  | 7.47  | Tpcn2         | 77672   | 1690603   | 1.936539292 | up   |
| MACS_PEAk_2880 | 52  | 23.02 | Arglu1        | 70798   | 6510398   | 1.500149727 | up   |
| MACS_PEAk_2882 | 88  | 30.01 | Col4a1        | 213559  | 1740575   | 3.014300823 | up   |
| MACS_PEAk_2896 | 37  | 18.78 | Erlin2        | 14026   | 5340603   | 2.231492758 | down |
| MACS_PEAk_2897 | 32  | 12.12 | Nrg1          | 786059  | 103060161 | 1.833201647 | up   |
| MACS_PEAk_2914 | 30  | 7.88  | Sorbs2        | 336865  | 6350112   | 1.909857392 | down |
| MACS_PEAk_2915 | 22  | 9.09  | Sorbs2        | 362267  | 6350112   | 1.909857392 | down |
| MACS_PEAk_2917 | 36  | 15.75 | Irf2          | 224012  | 5390044   | 1.701186299 | up   |
| MACS_PEAk_2918 | 25  | 12.12 | Irf2          | 257453  | 5390044   | 1.701186299 | up   |
| MACS_PEAk_2921 | 33  | 12.59 | Cdkn2aip      | 74090   | 3060670   | 1.746379733 | up   |
| MACS_PEAk_2922 | 17  | 9.09  | Cdkn2aip      | 97416   | 3060670   | 1.746379733 | up   |
| MACS_PEAk_2925 | 24  | 10.3  | Gpm6a         | 2101572 | 1660044   | 2.084709644 | down |
| MACS_PEAk_2929 | 27  | 11.51 | Palid         | 232156  | 102060332 | 2.444493532 | up   |
| MACS_PEAk_2939 | 56  | 32.11 | Csgalnact1    | 58634   | 5390746   | 1.569012284 | up   |
| MACS_PEAk_2941 | 39  | 19.99 | Upf1          | 13570   | 1190750   | 1.780835986 | up   |
| MACS_PEAk_2941 | 39  | 19.99 | Upf1          | 13570   | 430164    | 2.72619462  | up   |
| MACS_PEAk_2944 | 72  | 30.9  | Tpm4          | 22806   | 3850072   | 5.901847839 | down |
| MACS_PEAk_2944 | 72  | 30.9  | Tpm4          | 22806   | 4920162   | 11.63345242 | down |
| MACS_PEAk_2946 | 47  | 21.81 | Ednra         | 277426  | 6900133   | 1.612930536 | up   |
| MACS_PEAk_2952 | 26  | 13.33 | Smarca5       | 130599  | 6620050   | 3.157713652 | up   |
| MACS_PEAk_2955 | 23  | 8.44  | Il15          | 631723  | 4560332   | 2.160155296 | up   |
| MACS_PEAk_2956 | 16  | 9.09  | Zfp330        | 181502  | 1990504   | 1.561439037 | down |
| MACS_PEAk_2958 | 22  | 12.72 | Sall1         | 251309  | 5420020   | 1.546113729 | down |
| MACS_PEAk_2973 | 26  | 12.72 | Cdh8          | 2924032 | 2100348   | 1.914093852 | up   |
| MACS_PEAk_2974 | 22  | 10.3  | Cdh8          | 2917124 | 2100348   | 1.914093852 | up   |
| MACS_PEAk_2975 | 24  | 10.3  | Cdh8          | 2548126 | 2100348   | 1.914093852 | up   |
| MACS_PEAk_2976 | 20  | 7.88  | Cdh8          | 2386197 | 2100348   | 1.914093852 | up   |
| MACS_PEAk_2978 | 43  | 20.6  | Cdh8          | 3137195 | 2100348   | 1.914093852 | up   |
| MACS_PEAk_2979 | 17  | 7.27  | Cdh5          | 1296556 | 5340487   | 2.503920078 | up   |
| MACS_PEAk_2980 | 28  | 7.62  | Cdh5          | 1248705 | 5340487   | 2.503920078 | up   |
| MACS_PEAk_2981 | 19  | 7.27  | Cdh5          | 1117617 | 5340487   | 2.503920078 | up   |
| MACS_PEAk_2982 | 24  | 11.51 | Cdh5          | 1022979 | 5340487   | 2.503920078 | up   |
| MACS_PEAk_2983 | 49  | 14.1  | Cdh5          | 876964  | 5340487   | 2.503920078 | up   |
| MACS_PEAk_2984 | 44  | 13.01 | Cdh5          | 830726  | 5340487   | 2.503920078 | up   |
| MACS_PEAk_2985 | 57  | 27.87 | Cdh5          | 786795  | 5340487   | 2.503920078 | up   |
| MACS_PEAk_2988 | 40  | 7.66  | Slc12a4       | 14856   | 130731    | 1.859230638 | up   |
| MACS_PEAk_2995 | 19  | 10.3  | Wwp2          | 59248   | 6550079   | 1.589534521 | down |
| MACS_PEAk_2995 | 19  | 10.3  | Wwp2          | 59248   | 1090102   | 5.120452404 | down |
| MACS_PEAk_2996 | 39  | 10.16 | Wwp2          | 83603   | 6550079   | 1.589534521 | down |
| MACS_PEAk_2996 | 39  | 10.16 | Wwp2          | 83603   | 1090102   | 5.120452404 | down |
| MACS_PEAk_2997 | 77  | 25.49 | Wwp2          | 86312   | 6550079   | 1.589534521 | down |
| MACS_PEAk_2997 | 77  | 25.49 | Wwp2          | 86312   | 1090102   | 5.120452404 | down |
| MACS_PEAk_2998 | 36  | 13.93 | Wwp2          | 108451  | 6550079   | 1.589534521 | down |
| MACS_PEAk_2998 | 36  | 13.93 | Wwp2          | 108451  | 1090102   | 5.120452404 | down |
| MACS_PEAk_3007 | 21  | 6.66  | Plcg2         | 162287  | 5720008   | 2.247225523 | up   |
| MACS_PEAk_3009 | 37  | 13.93 | Gse1          | 165596  | 510273    | 1.679089785 | up   |
| MACS_PEAk_3021 | 60  | 29.69 | Rhou          | 99421   | 2470706   | 2.100575924 | up   |
| MACS_PEAk_3038 | 121 | 33.05 | Sesn3         | 386437  | 110687    | 2.475210667 | down |
| MACS_PEAk_3042 | 19  | 8.48  | Fat3          | 1494738 | 4670324   | 1.660501838 | up   |
| MACS_PEAk_3045 | 21  | 8.48  | Slc44a2       | 16847   | 4670020   | 2.969364405 | down |
| MACS_PEAk_3045 | 21  | 8.48  | Slc44a2       | 16847   | 6590347   | 4.12567997  | down |
| MACS_PEAk_3046 | 27  | 8.48  | Anln          | 22231   | 1780113   | 1.848033309 | down |
| MACS_PEAk_3088 | 116 | 25.88 | EtfA          | 105354  | 50347     | 2.289352417 | down |
| MACS_PEAk_3097 | 21  | 7.88  | Neo1          | 254846  | 100730537 | 1.652311444 | down |
| MACS_PEAk_3122 | 22  | 9.09  | Tln2          | 293960  | 100730390 | 1.781723261 | up   |
| MACS_PEAk_3123 | 17  | 7.88  | Tln2          | 151955  | 100730390 | 1.781723261 | up   |
| MACS_PEAk_3142 | 34  | 11.51 | Lrrc1         | 101001  | 6180746   | 1.585395694 | down |
| MACS_PEAk_3143 | 18  | 6.66  | Coll2a1       | 838246  | 100110731 | 1.992657542 | down |
| MACS_PEAk_3144 | 24  | 12.12 | Coll2a1       | 792428  | 100110731 | 1.992657542 | down |
| MACS_PEAk_3146 | 29  | 12.12 | Lca5          | 148784  | 106130102 | 1.678013563 | down |
| MACS_PEAk_3147 | 20  | 7.88  | Ttk           | 202759  | 105890725 | 1.543180704 | down |
| MACS_PEAk_3150 | 23  | 10.3  | Syncrip       | 40132   | 3140113   | 1.773158789 | down |
| MACS_PEAk_3150 | 23  | 10.3  | Syncrip       | 40132   | 1690195   | 1.894646764 | down |
| MACS_PEAk_3156 | 53  | 25.45 | 1190002N15Rik | 1661132 | 4390040   | 4.486179829 | down |
| MACS_PEAk_3163 | 30  | 7.27  | Cep70         | 73928   | 1780546   | 1.532244563 | down |
| MACS_PEAk_3179 | 50  | 8.49  | Smarc1        | 74177   | 7100047   | 2.387359428 | down |
| MACS_PEAk_3179 | 50  | 8.49  | Smarc1        | 74177   | 5080019   | 1.98176949  | down |
| MACS_PEAk_3191 | 29  | 11.08 | Aiz2          | 913267  | 2680463   | 1.792396307 | down |
| MACS_PEAk_3193 | 59  | 19.39 | Ilgap9        | 119407  | 670180    | 1.867954493 | up   |
| MACS_PEAk_3197 | 23  | 9.69  | Vill          | 20213   | 1980504   | 2.05437851  | down |
| MACS_PEAk_3198 | 21  | 9.69  | Vill          | 10572   | 1980504   | 2.05437851  | down |
| MACS_PEAk_3221 | 36  | 16.96 | Atp6ap2       | 518218  | 4010059   | 6.724124908 | down |
| MACS_PEAk_3221 | 36  | 16.96 | Atp6ap2       | 518218  | 7100347   | 6.21543026  | down |
| MACS_PEAk_3222 | 27  | 10.3  | Bcor          | 249767  | 3940053   | 1.556888342 | down |
| MACS_PEAk_3230 | 25  | 12.12 | 6720401G13Rik | 164663  | 106220215 | 1.954547167 | up   |
| MACS_PEAk_3248 | 22  | 8.48  | Pak3          | 113685  | 4210136   | 1.949670911 | down |

**Supplementary Table 6.** Number (No.) of zebrafish injected with the morpholinos and their respective phenotype.

|                   | <b>No. Injected</b> | <b>No. Alive at 24 hpf</b> | <b>Mild morphant</b> | <b>Severe morphant</b> | <b>Normal</b> | <b>Morpholino Sequence</b>         |
|-------------------|---------------------|----------------------------|----------------------|------------------------|---------------|------------------------------------|
| <i>Scrambled</i>  | 173                 | 155                        | 12                   | 0                      | 143           | 5'CCTCTTACCTCAGTTA<br>CAATTATA- 3' |
| <i>Tgfb2</i>      | 188                 | 140                        | 82                   | 45                     | 13            | 5'GGAGGCTCAAGACGT<br>ACAAGTTCAT3'  |
| <i>Fbxl18</i>     | 210                 | 187                        | 100                  | 68                     | 19            | 5'GTTTCGATTTGATTAT<br>TCATGGCGC3'  |
| <i>Tle3(Gro2)</i> | 188                 | 154                        | 77                   | 48                     | 29            | 5'CGGCCCTGTGGATACA<br>TCTTGAAT3'   |

**Note:** A p53 morpholino- 5'GACCTCCTCTCCACTAAACTACGAT3' was co-injected with all the morpholinos to reduce the off target effects.
